# Supplementary material for: Modular and stereoselective access to cis-diphosphinoalkenes
Source: Royal Society of Chemistry journal article supplement (doi:10.1039/d3qo00748k), 2023-01-01

## Content

|                                                                                  |            |
|----------------------------------------------------------------------------------|------------|
| <b>1. General Information.....</b>                                               | <b>S3</b>  |
| <b>2. Optimization of Reaction Conditions.....</b>                               | <b>S4</b>  |
| <b>3. Mechanism experiments.....</b>                                             | <b>S5</b>  |
| <b>4. General procedure for the synthesis of secondary phosphine oxides.....</b> | <b>S12</b> |
| <b>5. General procedure for the synthesis of alkynylphosphine oxides.....</b>    | <b>S12</b> |
| <b>6. General procedure for the synthesis of alkynylphosphine sulfides.....</b>  | <b>S13</b> |
| <b>7. Hydrophosphination of alkynylphosphine oxides/sulfides.....</b>            | <b>S14</b> |
| <b>8. Synthetic applications.....</b>                                            | <b>S15</b> |
| <b>9. Catalytic potential of the biphosphine ligands library.....</b>            | <b>S18</b> |
| <b>10. X-ray crystal structures.....</b>                                         | <b>S20</b> |
| <b>11. Characteristic data.....</b>                                              | <b>S27</b> |
| <b>12. DFT Calculation.....</b>                                                  | <b>S51</b> |
| <b>13. Reference.....</b>                                                        | <b>S58</b> |
| <b>14. NMR spectra.....</b>                                                      | <b>S59</b> |

## 1. General Information

Unless otherwise noted, materials were purchased from commercial suppliers and used without further purification. All reactions were carried out in sealed tubes filled with argon. All reactions were monitored by Thin Layer Chromatography (TLC) and visualized using UV light. Products were purified by column chromatography by 200-300 mesh silica. NMR spectra ( $^1\text{H}$ ,  $^{13}\text{C}$ ,  $^{31}\text{P}$ ,  $^{11}\text{B}$ ,  $^{19}\text{F}$ ) were recorded on 400 or 600 MHz spectrophotometers. Chemical shifts ( $\delta$ ) are reported in ppm from the resonance of the residual solvent peak or tetramethylsilane (TMS) as the internal standard.  $^1\text{H}$  NMR data are reported as follows: chemical shift ( $\delta$  ppm), multiplicity (s = singlet, d = doublet, t = triplet, q = quartet, m = multiplet), coupling constants (Hz) and integration. Data for  $^{13}\text{C}$ ,  $^{31}\text{P}$ ,  $^{11}\text{B}$  and  $^{19}\text{F}$  NMR are reported in terms of chemical shifts and multiplicity where appropriate. The high resolution mass spectra (HRMS) were measured on a Thermo-Fisher Scientific Q Exactive MS/MS System ESI spectrometer. X-ray diffraction data was collected on an Oxford Diffraction Xcalibur CCD (X-ray single-crystal diffractometer).

## 2. Optimization of Reaction Conditions

**Table S1. Screening of the solvents**<sup>a</sup>

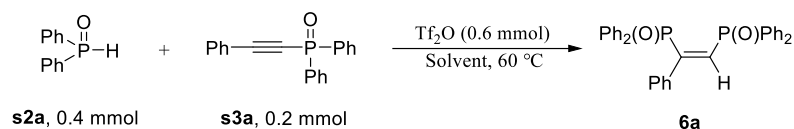

| Entry | Solvent            | Yield (%) <sup>b</sup> |
|-------|--------------------|------------------------|
| 1     | DCM                | 56                     |
| 2     | CH <sub>3</sub> CN | 60                     |
| 3     | toluene            | 62                     |
| 4     | DMSO               | N.R.                   |
| 5     | DMAC               | N.R.                   |
| 6     | DCE                | 67                     |
| 7     | THF                | N.D.                   |
| 8     | PhCF <sub>3</sub>  | 64                     |
| 9     | CHCl <sub>3</sub>  | 75                     |

<sup>a</sup>Reaction conditions: **s2a** (0.4 mmol, 2.0 equiv), **s3a** (0.2 mmol, 1.0 equiv) and Tf<sub>2</sub>O (0.6 mmol, 3.0 equiv) in Solvent (2.0 mL) at 60 °C under Ar for 3 h.<sup>b</sup>Isolated yield.

**Table S2. Screening of loading of Tf<sub>2</sub>O**<sup>a</sup>

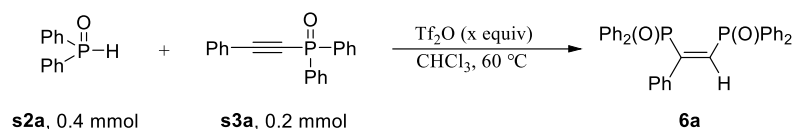

| Entry | Tf <sub>2</sub> O (x equiv) | Yield (%) <sup>b</sup> |
|-------|-----------------------------|------------------------|
| 1     | 2.0                         | 53                     |
| 2     | 3.0                         | 75                     |
| 3     | 4.0                         | 79                     |

<sup>a</sup>Reaction conditions: **s2a** (0.4 mmol, 2.0 equiv), **s3a** (0.2 mmol, 1.0 equiv) and Tf<sub>2</sub>O (x equiv) in Solvent (2.0 mL) at 60 °C under Ar for 3 h.<sup>b</sup>Isolated yield.

**Table S3. Screening of the mixed solvents**<sup>a</sup>

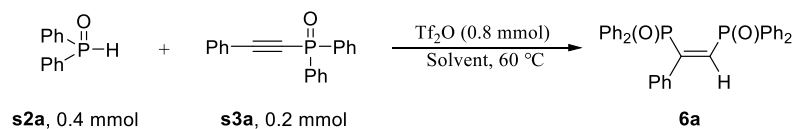

| Entry | Solvent                                      | Yield (%) <sup>b</sup> |
|-------|----------------------------------------------|------------------------|
| 1     | CHCl <sub>3</sub> :CH <sub>3</sub> CN (1:1)  | 71                     |
| 2     | CHCl <sub>3</sub> :CH <sub>3</sub> CN (3:1)  | 84                     |
| 3     | CHCl <sub>3</sub> :CH <sub>3</sub> CN (10:1) | 89                     |

<sup>a</sup>Reaction conditions: **s2a** (0.4 mmol, 2.0 equiv), **s3a** (0.2 mmol, 1.0 equiv) and Tf<sub>2</sub>O (0.8 mmol, 4.0 equiv) in Solvent (2.0 mL) at 60 °C under Ar for 3 h.<sup>b</sup>Isolated yield.

### 3. Mechanism experiments

#### 3.1 Control experiments with (3-methoxyprop-1-yn-1-yl)benzene

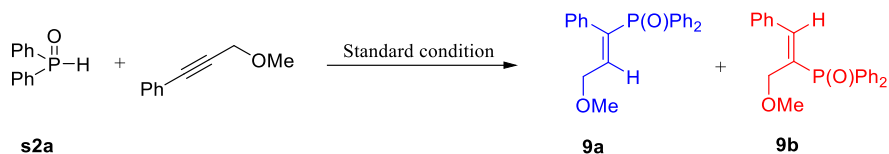

A 10 mL oven-dried sealed tube equipped with a magnetic stir bar was charged with **s2a** (80.8 mg, 0.4 mmol, 2.0 equiv), (3-methoxyprop-1-yn-1-yl)benzene (29.2 mg, 0.2 mmol, 1.0 equiv). The tube was evacuated and backfilled with argon (three times) and then  $\text{CHCl}_3$  (2.0 mL) and  $\text{CH}_3\text{CN}$  (0.2 mL) was added sequentially via a syringe. The resulting mixture was stirred until it became a homogeneous solution.  $\text{Tf}_2\text{O}$  (133  $\mu\text{L}$ , 0.8 mmol, 4.0 equiv) was then added by a syringe. The resulting mixture was stirred for 3 h at 60  $^\circ\text{C}$ . After cooled to ambient temperature, sat.  $\text{NaHCO}_3$  aq (5.0 mL) was added and the resulting mixture was extracted with DCM (3 x 10.0 mL). The organic layer was washed with brine, and dried over  $\text{MgSO}_4$  and volatiles were removed under reduced pressure. The residue was purified by flash column chromatography on silica gel to give the products **9a** and **9b**. The corresponding mixed products **9a** and **9b** was isolated, which indicated that the reaction proceeded through a three-membered phosphirenium cation process previously reported by Masahiro Miura group.<sup>40</sup>

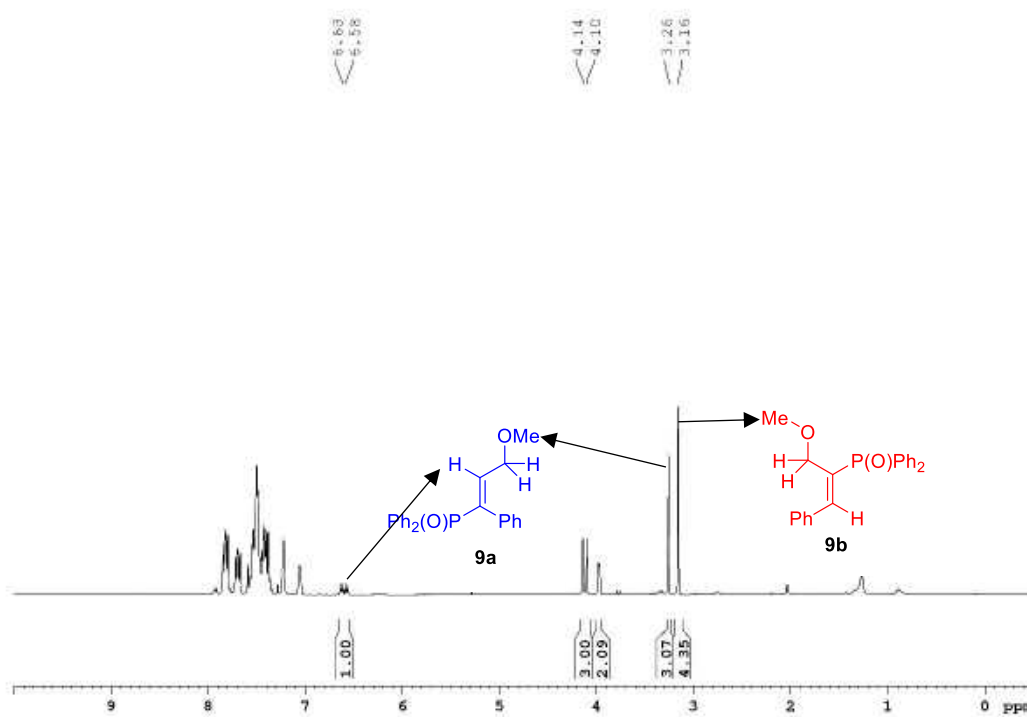

### 3.2 Control experiment using H<sub>2</sub>O or D<sub>2</sub>O

#### 3.2.1 Control experiment using H<sub>2</sub>O

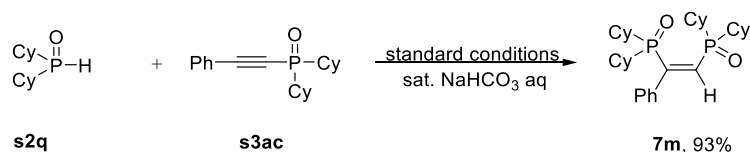

A 10 mL oven-dried sealed tube equipped with a magnetic stir bar was charged with **s2q** (85.6 mg, 0.4 mmol, 2.0 equiv), **s3ac** (62.8 mg, 0.2 mmol, 1.0 equiv). The tube was evacuated and backfilled with argon (three times) and then CHCl<sub>3</sub> (2.0 mL) and CH<sub>3</sub>CN (0.2 mL) was added sequentially via a syringe. The resulting mixture was stirred until it became a homogeneous solution. Tf<sub>2</sub>O (133 uL, 0.8 mmol, 4.0 equiv) was then added by a syringe. The resulting mixture was stirred for 3 h at 60 °C. After cooled to ambient temperature, sat. NaHCO<sub>3</sub> aq (5.0 mL) was added and the resulting mixture was extracted with DCM (3 x 10.0 mL). The organic layer was washed with brine, and dried over MgSO<sub>4</sub> and volatiles were removed under reduced pressure. The residue was purified by flash column chromatography on silica gel to give the desired product.

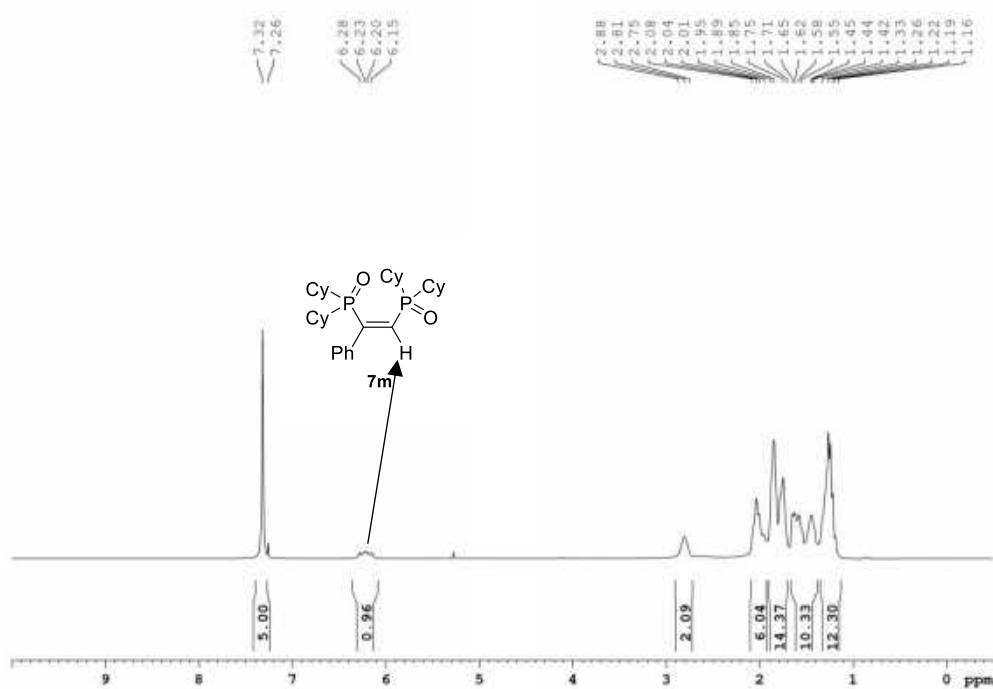

Figure S2. <sup>1</sup>H NMR Spectra of **7m** (quenched with H<sub>2</sub>O)

#### 3.2.2 Control experiment using D<sub>2</sub>O

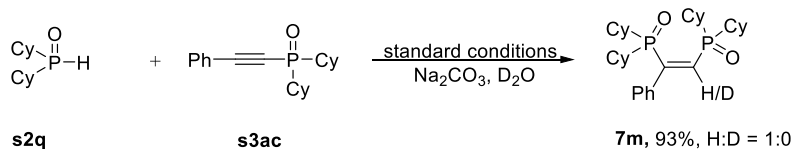

A 10 mL oven-dried sealed tube equipped with a magnetic stir bar was charged with **s2q** (85.6 mg, 0.4 mmol, 2.0 equiv), **s3ac** (62.8 mg, 0.2 mmol, 1.0 equiv). The tube was evacuated and backfilled with argon (three times) and then CHCl<sub>3</sub> (2.0 mL) and CH<sub>3</sub>CN (0.2 mL) was added sequentially via a syringe. The resulting mixture was stirred until it became a homogeneous solution. Tf<sub>2</sub>O (133 uL, 0.8 mmol, 4.0 equiv) was then added by a syringe. The resulting mixture was stirred for 3 h at 60 °C. After cooled to ambient temperature, D<sub>2</sub>O (1.0 mL) was added to the mixture and stirred for additional 30 min at room temperature. Na<sub>2</sub>CO<sub>3</sub> was added and the resulting mixture was extracted with DCM (3 x 10.0 mL). The organic layer was

dried over  $\text{MgSO}_4$  and volatiles were removed under reduced pressure. The residue was purified by flash column chromatography on silica gel to give the desired product. The corresponding products **7m** (0% D) was isolated, which indicated that the hydrogen didn't come from outside water.

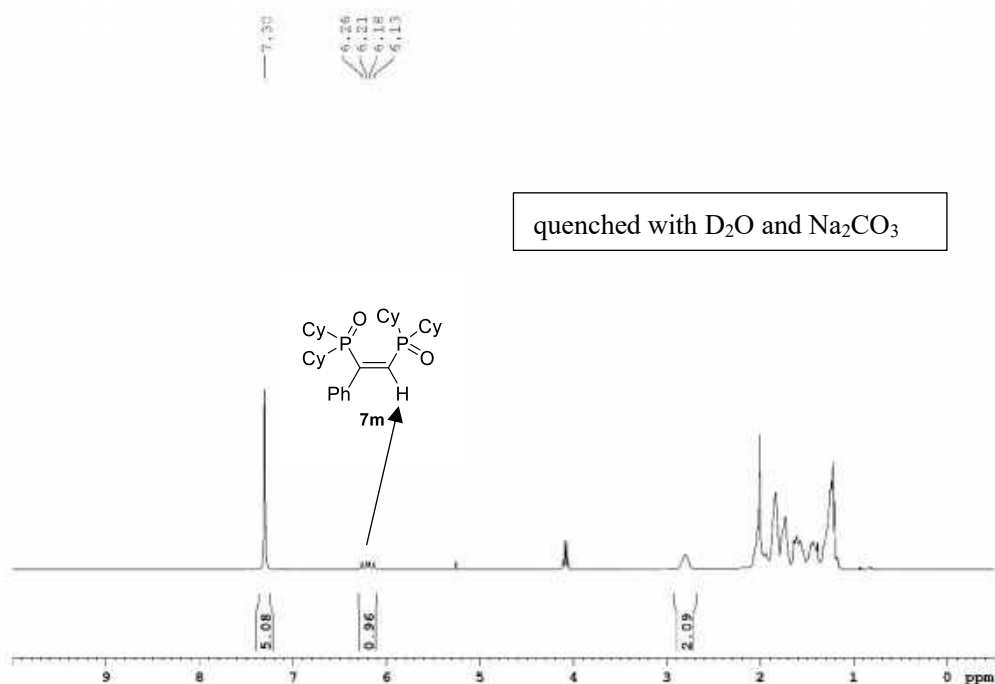

**Figure S3.**  $^1\text{H}$  NMR Spectra of **7m** (quenched with  $\text{D}_2\text{O}$ )

### 3.2.3 Control experiment using $\text{H}_2^{18}\text{O}$

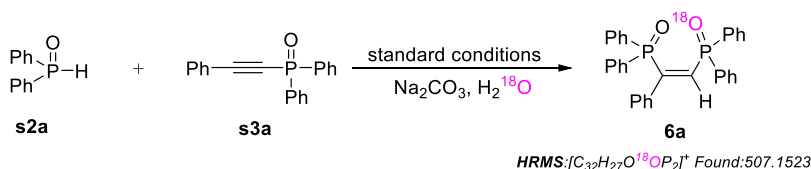

A 10 mL oven-dried sealed tube equipped with a magnetic stir bar was charged with **s2a** (80.8 mg, 0.4 mmol, 2.0 equiv), **s3a** (60.4 mg, 0.2 mmol, 1.0 equiv). The tube was evacuated and backfilled with argon (three times) and then  $\text{CHCl}_3$  (2.0 mL) and  $\text{CH}_3\text{CN}$  (0.2 mL) was added sequentially via a syringe. The resulting mixture was stirred until it became a homogeneous solution.  $\text{Ti}_2\text{O}$  (133  $\mu\text{L}$ , 0.8 mmol, 4.0 equiv) was then added by a syringe. The resulting mixture was stirred for 3 h at  $60^\circ\text{C}$ . After cooled to ambient temperature,  $\text{H}_2^{18}\text{O}$  (0.1 mL) was added to the mixture and stirred for additional 30 min at room temperature. Then sat.  $\text{NaHCO}_3$  aq (5.0 mL) was added and the resulting mixture was extracted with DCM (3 x 10.0 mL). The organic layer was dried over  $\text{MgSO}_4$  and volatiles were removed under reduced pressure. The residue was purified by flash column chromatography on silica gel to give the desired product. The corresponding products **6a** (HRMS:  $[\text{C}_{32}\text{H}_{27}\text{O}^{18}\text{P}_2]^+$ , calcd: 507.1523, Found 507.1525, labelled with single  $^{18}\text{O}$ ) was isolated, which indicated that one of the oxygens did come from outside water.

### 3.3 Control experiment using Ph<sub>2</sub>P(O)H or Ph<sub>2</sub>P(O)D

#### 3.3.1 Control experiment using Ph<sub>2</sub>P(O)H

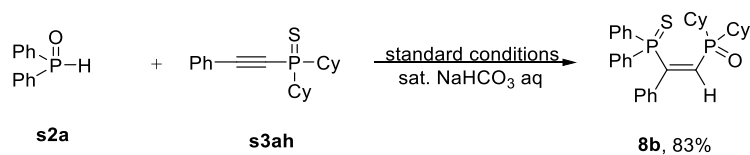

A 10 mL oven-dried sealed tube equipped with a magnetic stir bar was charged with **s2a** (80.8 mg, 0.4 mmol, 2.0 equiv), **s3ah** (66.0 mg, 0.2 mmol, 1.0 equiv). The tube was evacuated and backfilled with argon (three times) and then CHCl<sub>3</sub> (2.0 mL) and CH<sub>3</sub>CN (0.2 mL) was added sequentially via a syringe. The resulting mixture was stirred until it became a homogeneous solution. Tf<sub>2</sub>O (133 uL, 0.8 mmol, 4.0 equiv) was then added by a syringe. The resulting mixture was stirred for 3 h at 60 °C. After cooled to ambient temperature, sat. NaHCO<sub>3</sub> aq (5.0 mL) was added and the resulting mixture was extracted with DCM (3 x 10.0 mL). The organic layer was washed with brine, and dried over MgSO<sub>4</sub> and volatiles were removed under reduced pressure. The residue was purified by flash column chromatography on silica gel to give the desired product.

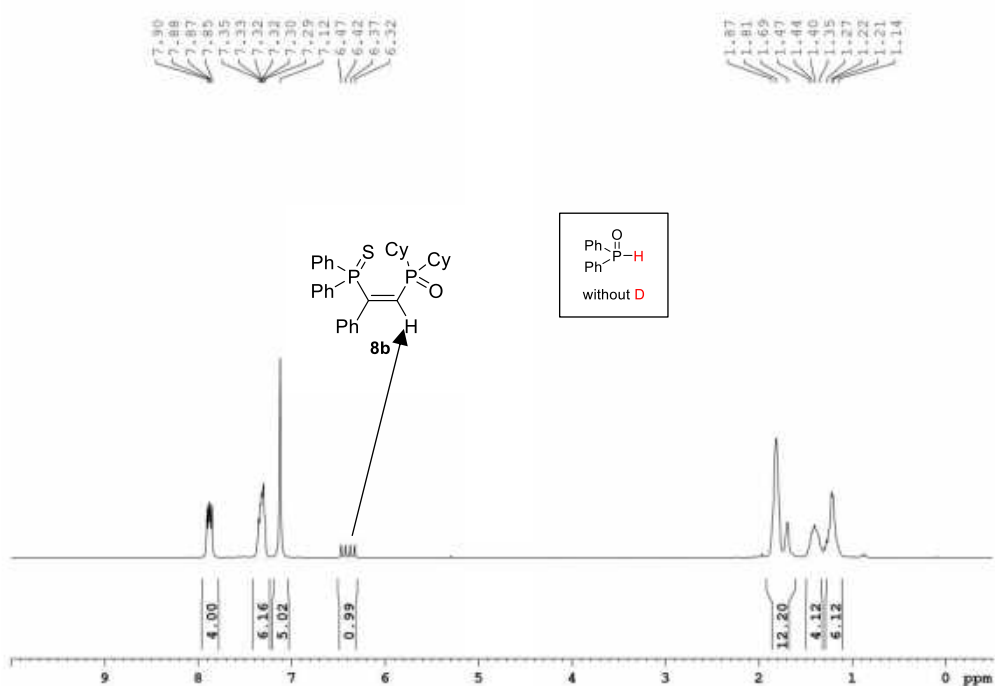

**Figure S4.** <sup>1</sup>H NMR Spectra of **8b** (using Ph<sub>2</sub>P(O)H)

### 3.3.2 Control experiment using Ph<sub>2</sub>P(O)D

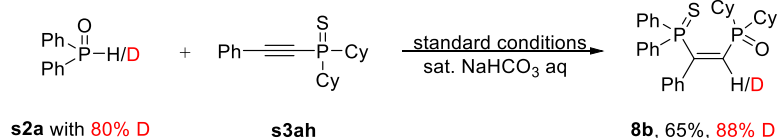

A 10 mL oven-dried sealed tube equipped with a magnetic stir bar was charged with **s2a** (80.8 mg, 0.4 mmol, 2.0 equiv), **s3ah** (66.0 mg, 0.2 mmol, 1.0 equiv). The tube was evacuated and backfilled with argon (three times) and then CHCl<sub>3</sub> (2.0 mL) and CH<sub>3</sub>CN (0.2 mL) was added sequentially via a syringe. The resulting mixture was stirred until it became a homogeneous solution. Tf<sub>2</sub>O (133 uL, 0.8 mmol, 4.0 equiv) was then added by a syringe. The resulting mixture was stirred for 3 h at 60 °C. After cooled to ambient temperature, sat. NaHCO<sub>3</sub> aq (5.0 mL) was added and the resulting mixture was extracted with DCM (3 x 10.0 mL). The organic layer was washed with brine, and dried over MgSO<sub>4</sub> and volatiles were removed under reduced pressure. The residue was purified by flash column chromatography on silica gel to give the desired product. The corresponding products **8b** (H/D = 12/88) was isolated, which indicated that the hydrogen did come from secondary phosphine oxide (**s2a**).

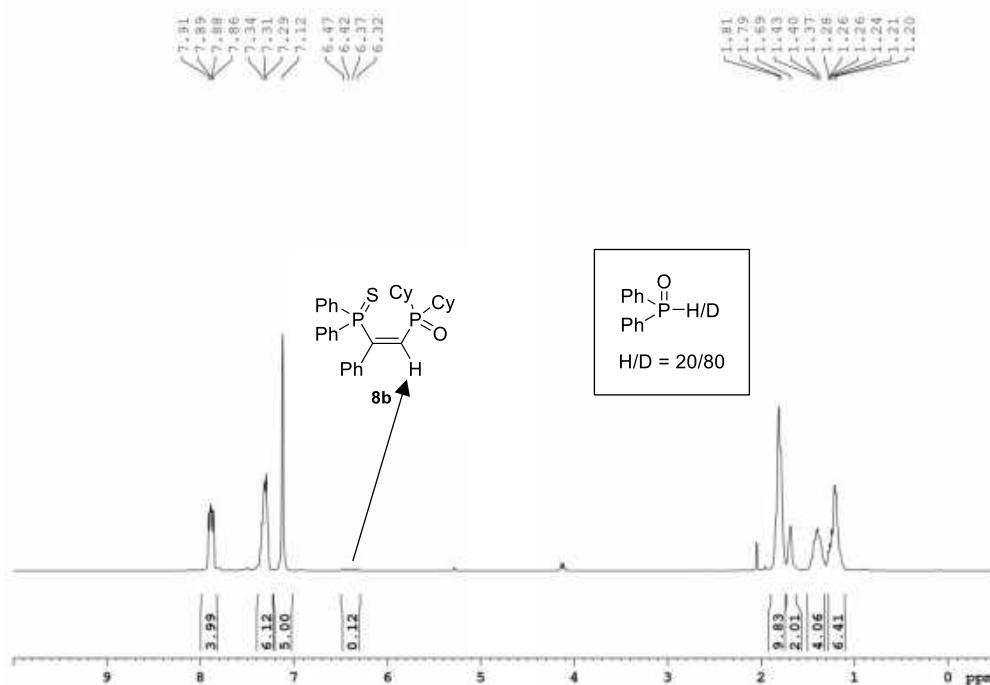

**Figure S5.** <sup>1</sup>H NMR Spectra of **8b** (using Ph<sub>2</sub>P(O)D)



### 3.4 *In situ* $^{31}\text{P}$ NMR and $^1\text{H}$ NMR spectra

#### 3.4.1 *In situ* $^{31}\text{P}$ NMR spectra

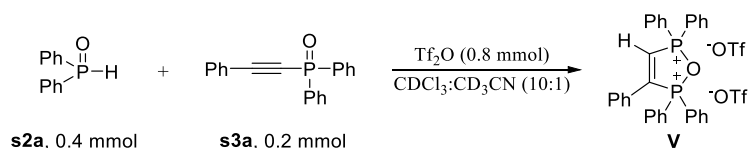

A 10 mL oven-dried sealed tube equipped with a magnetic stir bar was charged with **s2a** (80.8mg, 0.4 mmol, 2.0 equiv), **s3a** (60.4 mg, 0.2 mmol, 1.0 equiv). The tube was evacuated and backfilled with argon (three times) and then  $\text{CDCl}_3$  (2.0 mL) and  $\text{CD}_3\text{CN}$  (0.2 mL) was added sequentially via a syringe. The resulting mixture was stirred until it became a homogeneous solution.  $\text{Tf}_2\text{O}$  (133  $\mu\text{L}$ , 0.8 mmol, 4.0 equiv) was then added by a syringe. After 2.5 h at 60  $^\circ\text{C}$ , ca. 0.5 mL of this mixture was transferred to a NMR tube by a syringe. The resulting solution was monitored by  $^{31}\text{P}$  NMR (Figure S6). It showed three singlet signals ( $\delta$  89.0, 88.0 and 43.2) when the reaction was over. The third peak ( $\delta$  43.2) is corresponding to  $\text{Ph}_2\text{P}(\text{O})\text{Cl}$  that previously reported by Masahiro Miura group.<sup>40</sup> We speculated that the first two peaks belong to **V** according to the published paper.<sup>44</sup>

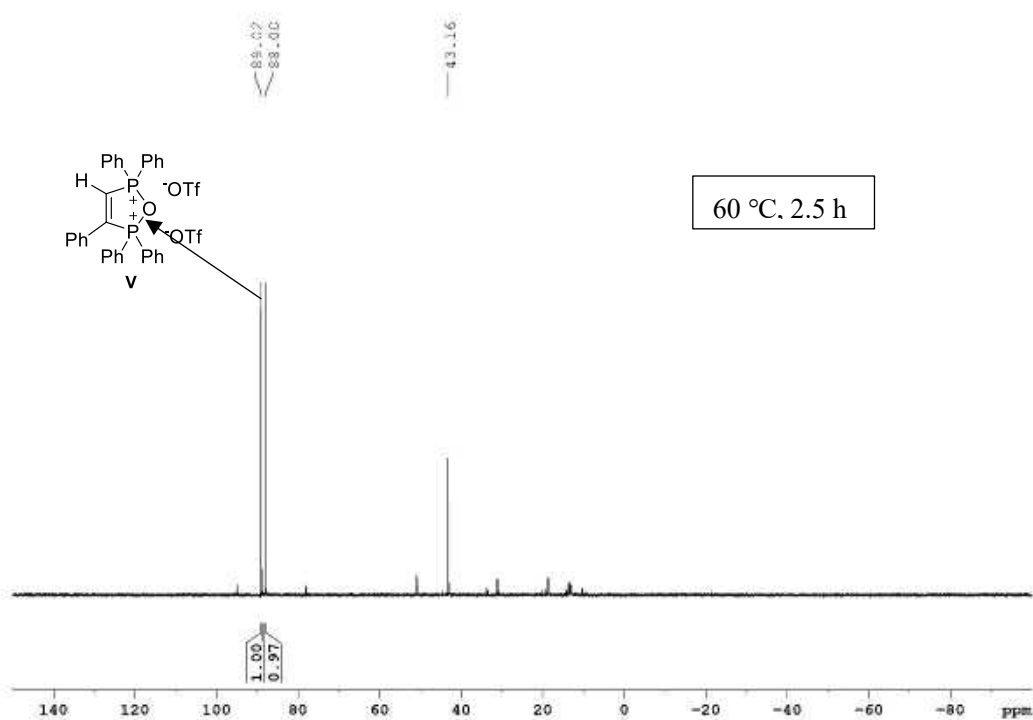

**Figure S6.** *In situ*  $^{31}\text{P}$  NMR spectra

### 3.4.2 *In situ* $^1\text{H}$ NMR spectra

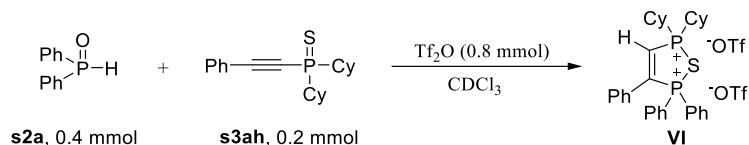

A 10 mL oven-dried sealed tube equipped with a magnetic stir bar was charged with **s2a** (80.8mg, 0.4 mmol, 2.0 equiv), **s3ah** (66.0 mg, 0.2 mmol, 1.0 equiv). The tube was evacuated and backfilled with argon (three times) and then  $\text{CDCl}_3$  (2.0 mL) was added sequentially via a syringe. The resulting mixture was stirred until it became a homogeneous solution.  $\text{Tf}_2\text{O}$  (133  $\mu\text{L}$ , 0.8 mmol, 4.0 equiv) was then added by a syringe. After 3.0 h at 60  $^\circ\text{C}$ , ca. 0.5 mL of this mixture was transferred to a NMR tube by a syringe. The resulting solution was monitored by  $^1\text{H}$  NMR (Figure S7). It showed one doublet of doublets at  $\delta$  8.78. This indicated that the hydrogen atom is added to the intermediate before quenching.

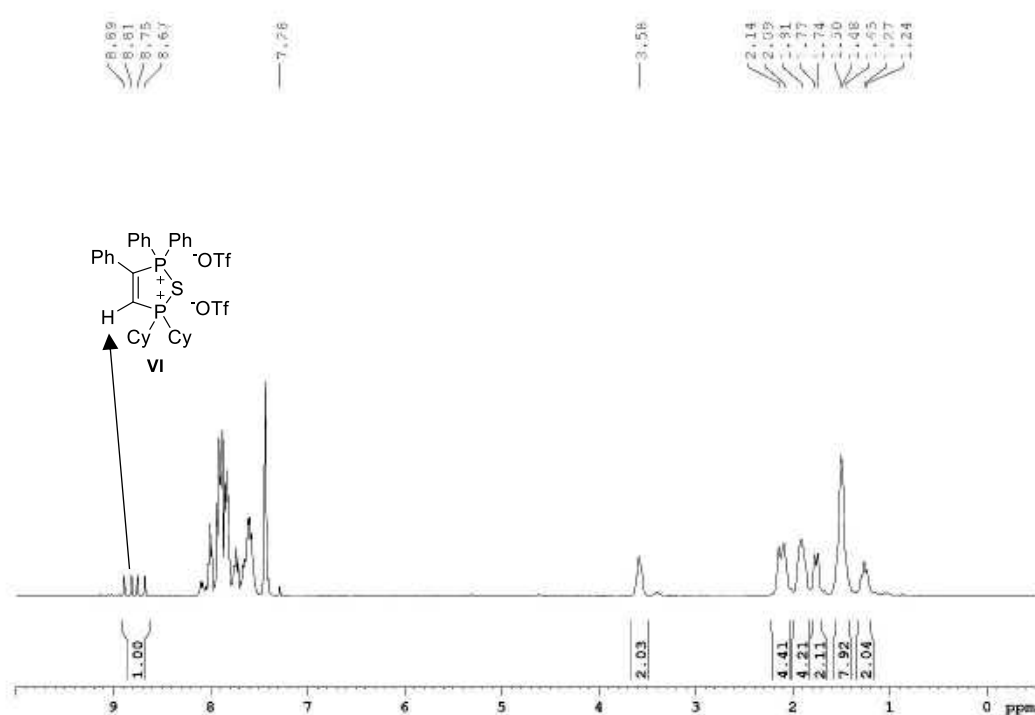

**Figure S7.** *In situ*  $^1\text{H}$  NMR spectra

#### 4. General procedure for the synthesis of secondary phosphine oxides

Diaryl secondary phosphine oxides (**s2b** – **s2r**, **s2v** and **s2x**) were synthesized according to the published procedure.<sup>45</sup> Phenyl-alkyl secondary phosphine oxides (**s2s** – **s2u** and **s2w**) were synthesized according to reference the published procedure.<sup>46</sup>

**Table S4. Substrates of secondary phosphine oxides**

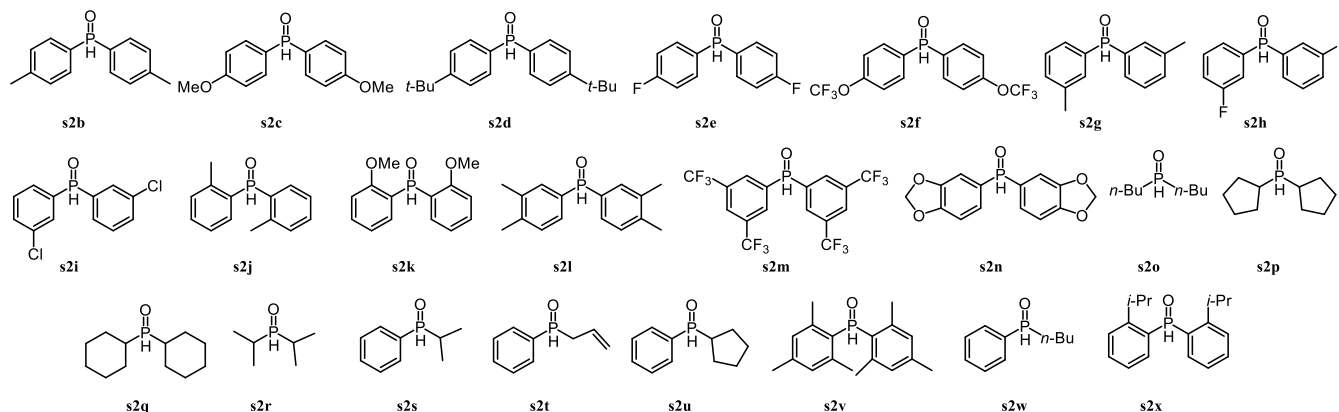

#### 5. General procedure for the synthesis of alkynylphosphine oxides

The alkynylphosphine oxides (**s3a** – **s3o** and **s3t**) were synthesized according to the following procedure (**GP1**).<sup>47</sup> The alkynylphosphine oxides (**s3p** – **s3s** and **s3ac**) were synthesized according to the published procedure.<sup>48</sup> The alkynylphosphine oxides (**s3u** – **s3ab** and **s3ad**) were synthesized according to the following procedure (**GP2**).<sup>49</sup>

**Table S5. Substrates of alkynylphosphine oxides**

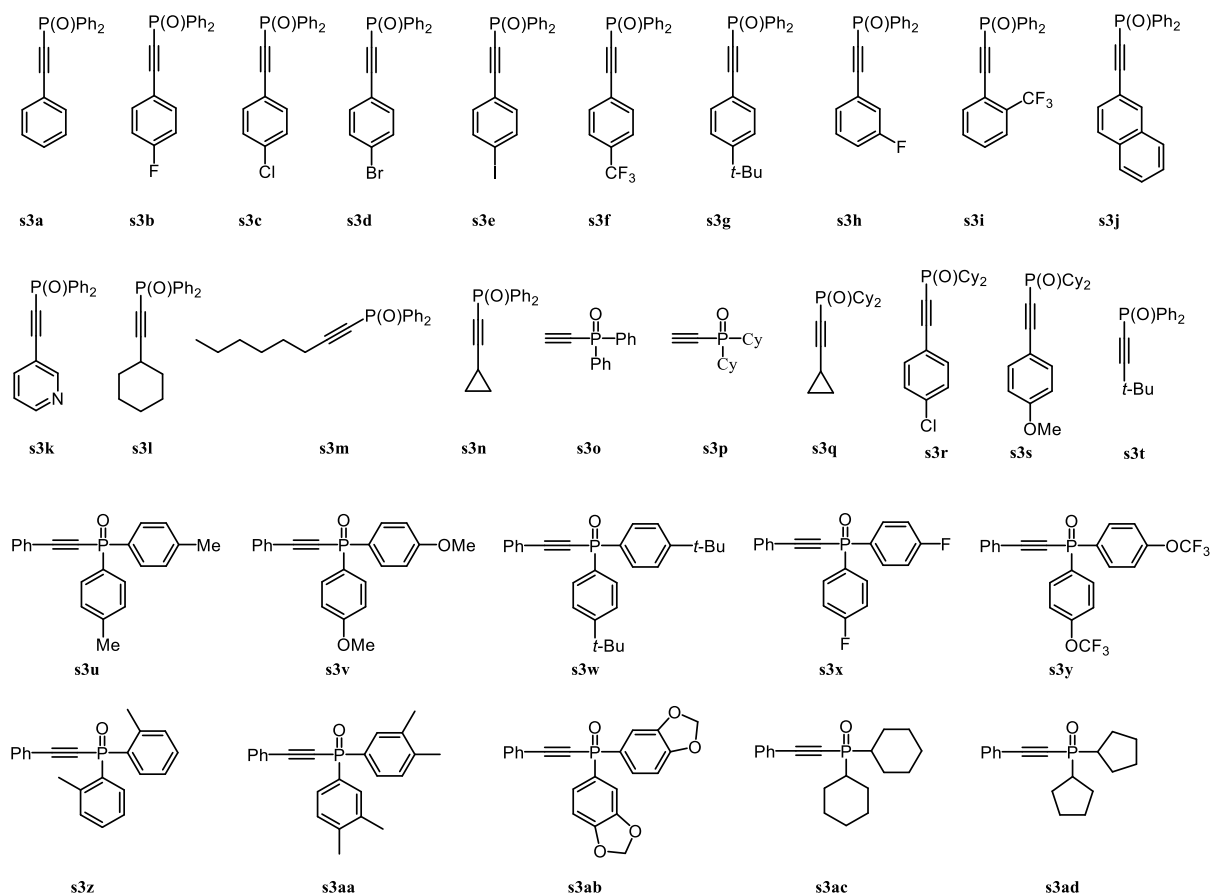

### General Procedure 1 (GP1)

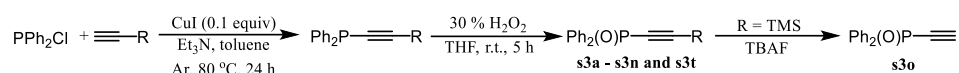

To a flask were added CuI (0.5 mmol, 0.1 equiv), Ph<sub>2</sub>PCl (5.0 mmol, 1.0 equiv), alkyne (6.0 mmol, 1.2 equiv), triethylamine (10.0 mmol, 2.0 equiv) and toluene (15.0 mL), and the mixture was stirred under Ar at 80 °C for 24 h. After workup with AcOEt/water, the organic layer was washed with aqueous NH<sub>4</sub>Cl and brine, and dried over MgSO<sub>4</sub>. After filtration, the volatiles were removed under reduced pressure. The crude product was used for next step without purification. To the crude product were added THF (20.0 mL) and then 30% H<sub>2</sub>O<sub>2</sub> (1.0 mL) at 0 °C, and the mixture was stirred under air at r.t. for 5 h. After workup with CH<sub>2</sub>Cl<sub>2</sub>/water, the organic layer was washed with brine, and dried over MgSO<sub>4</sub>. After filtration, the volatiles were removed under reduced pressure. For **s3o** the crude product was used for next step without purification. To the crude product were added water (0.25 mL) and THF (30.0 mL), and then TBAF (1.0 M in THF, 0.5 mL, 0.5 mmol) at 0 °C, and the mixture was stirred under air at r.t. for 5 h. After the volatiles were removed under reduced pressure, the residue was purified by flash column chromatography on silica gel to afford corresponding alkynylphosphine oxides (65% - 80% overall yield).

### General Procedure 2 (GP2)

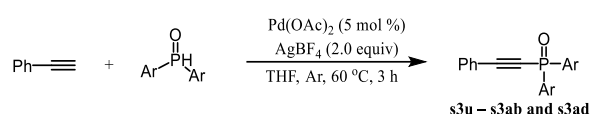

A 10 mL oven-dried sealed tube equipped with a magnetic stir bar was charged with secondary phosphine oxide (1.0 mmol, 1.0 equiv), phenylacetylene (1.0 mmol, 1.0 equiv), Pd(OAc)<sub>2</sub> (5 mol %), AgBF<sub>4</sub> (2.0 mmol, 2.0 equiv) and THF (3.0 mL). The mixture was stirred under Ar at 60 °C for 3 h. Then Et<sub>3</sub>N (5.0 mL) was added. After the volatiles were removed under reduced pressure, the residue was purified by flash column chromatography on silica gel to afford corresponding alkynylphosphine oxides (20% - 79% yield).

### 6. General procedure for the synthesis of alkynylphosphine sulfides

The alkynylphosphine sulfides (**s3ae**, **s3ag** and **s3ai**) were synthesized according to the following procedure (**GP3**). The alkynylphosphine sulfides (**s3af**, **s3ah** and **s3aj**) were synthesized according to the following procedure (**GP4**).

**Table S6. Substrates of alkynylphosphine sulfides**

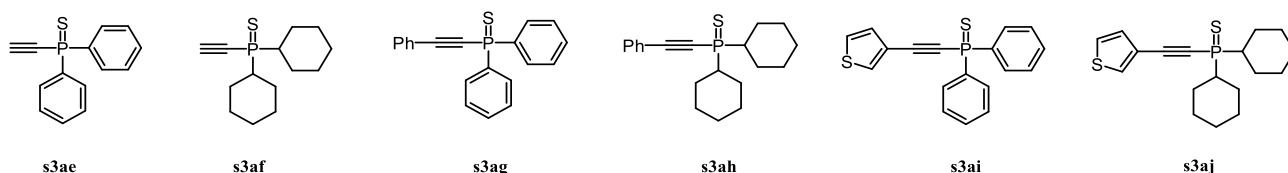

### General Procedure 3 (GP3)

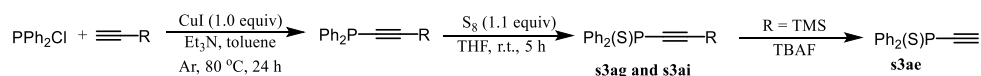

To a flask were added CuI (0.5 mmol, 0.1 equiv), Ph<sub>2</sub>PCl (5.0 mmol, 1.0 equiv), alkyne (6.0 mmol, 1.2 equiv), triethylamine (10.0 mmol, 2.0 equiv) and toluene (15.0 mL), and the mixture was stirred under Ar at 80 °C for 24 h. After workup with AcOEt/water, the organic layer was washed with aqueous NH<sub>4</sub>Cl and brine, and dried over MgSO<sub>4</sub>. After filtration, the volatiles were removed under reduced pressure. The crude product was used for next step without purification. To the crude product were added THF (20.0 mL) and then S<sub>8</sub> (5.5 mmol, 1.1 equiv) at 0 °C, and the mixture was stirred under Ar at r.t. for 5 h. After workup with CH<sub>2</sub>Cl<sub>2</sub>/water, the organic layer was washed with brine, and dried over MgSO<sub>4</sub>. After filtration, the volatiles were removed under reduced pressure. For **s3ae**, the crude product was used for next step without purification. To the crude product were added water (0.25 mL) and THF (30.0 mL), and then TBAF (1.0 M in THF, 0.5 mL, 0.5 mmol) at 0 °C, and the mixture was stirred under air at r.t. for 5 h. After the volatiles were removed under reduced pressure, the residue was purified by flash column chromatography on silica gel to afford corresponding alkynylphosphine sulfides (65% - 80% overall yield).

## General Procedure 4 (GP4)

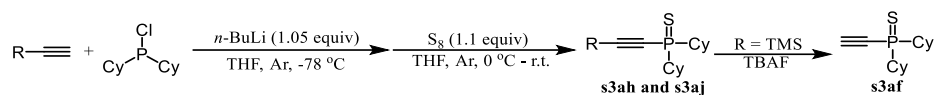

To a flask was added THF (40.0 mL) and alkyne (8.8 mmol, 1.05 equiv), cooled to  $-78\text{ }^\circ\text{C}$  and *n*-BuLi (8.8 mmol, 1.05 equiv) was added dropwise over 20 min under Ar. The resulting mixture was stirred and allowed to warm to  $0\text{ }^\circ\text{C}$  over 20 min, then cooled to  $-78\text{ }^\circ\text{C}$  and chlorodicyclohexylphosphine (8.4 mmol, 1.0 equiv) added dropwise over 10 min. The resulting mixture was allowed to warm to room temperature over 2 h then cooled to  $0\text{ }^\circ\text{C}$  and  $\text{S}_8$  (9.2 mmol, 1.1 equiv) was added under Ar. The reaction mixture was allowed to warm to room temperature and stirred for additional 4 h. The reaction was quenched with water (20.0 mL), and the aqueous phase was extracted with diethyl ether (3 x 40.0 mL). The combined organic layer was washed with brine, dried over  $\text{MgSO}_4$ , and the solvent removed under reduced pressure. For **s3af**, the crude product was used for next step without purification. To the crude product were added water (0.5 mL) and THF (40.0 mL), and then TBAF (1.0 M in THF, 1.0 mL, 1.0 mmol) at  $0\text{ }^\circ\text{C}$ , and the mixture was stirred under air at r.t. for 5 h. After the volatiles were removed under reduced pressure, the residue was purified by flash column chromatography on silica gel to afford corresponding alkynylphosphine sulfides (80% - 85% overall yield).

## 7. Hydrophosphination of alkynylphosphine oxides/sulfides

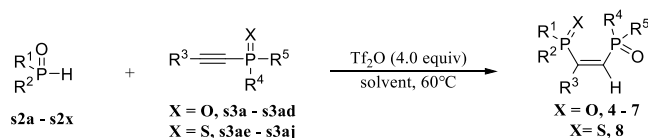

## General Procedure 5 (GP5)

A 10 mL oven-dried sealed tube equipped with a magnetic stir bar was charged with secondary phosphine oxide (0.4 mmol, 2.0 equiv), alkynylphosphine oxide/alkynylphosphine sulfide (0.2 mmol, 1.0 equiv). The tube was evacuated and backfilled with argon (three times) and then  $\text{CHCl}_3$  (2.0 mL) and  $\text{CH}_3\text{CN}$  (0.2 mL) was added sequentially via a syringe. The resulting mixture was stirred until it became a homogeneous solution.  $\text{Ti}_2\text{O}$  (0.8 mmol, 4.0 equiv) was then added by a syringe. The resulting mixture was stirred for 3 h at  $60\text{ }^\circ\text{C}$ . After cooled to ambient temperature, sat.  $\text{NaHCO}_3$  aq (5.0 mL) was added and the resulting mixture was extracted with DCM (3 x 10.0 mL). The organic layer was washed with brine, and dried over  $\text{MgSO}_4$  and volatiles were removed under reduced pressure. The residue was purified by flash column chromatography on silica gel to give the desired products.

## 8. Synthetic applications

### 8.1 Scale-up synthesis for 6n, 7m and 7at

A 50 mL oven-dried sealed tube equipped with a magnetic stir bar was charged with secondary phosphine oxide **s2q** (0.86 g, 4.0 mmol, 2.0 equiv). Alkynylphosphine oxide **s3a** (0.60 g, 2.0 mmol, 1.0 equiv), **s3ac** (0.63 g, 2.0 mmol, 1.0 equiv) or **s3p** (0.48 g, 2.0 mmol, 1.0 equiv) was added respectively. The tube was evacuated and backfilled with argon (three times) and then  $\text{CHCl}_3$  (10.0 mL) and  $\text{CH}_3\text{CN}$  (1.0 mL) was added sequentially via a syringe. The resulting mixture was stirred until it became a homogeneous solution.  $\text{Tf}_2\text{O}$  (1.33 mL, 8.0 mmol, 4.0 equiv) was then added by a syringe. The resulting mixture was stirred for 3 h at 60 °C. After cooled to ambient temperature, sat.  $\text{NaHCO}_3$  aq (20.0 mL) was added and the resulting mixture was extracted with DCM (3 x 30.0 mL). The organic layer was washed with brine, and dried over  $\text{MgSO}_4$  and volatiles were removed under reduced pressure. The residue was purified by flash column chromatography on silica gel to give the corresponding product **6n** (0.96 g, 93% yield), **7m** (0.85 g, 80% yield) or **7at** (0.63 g, 70% yield) respectively.

### 8.2 100 g Scale-up synthesis of 7o

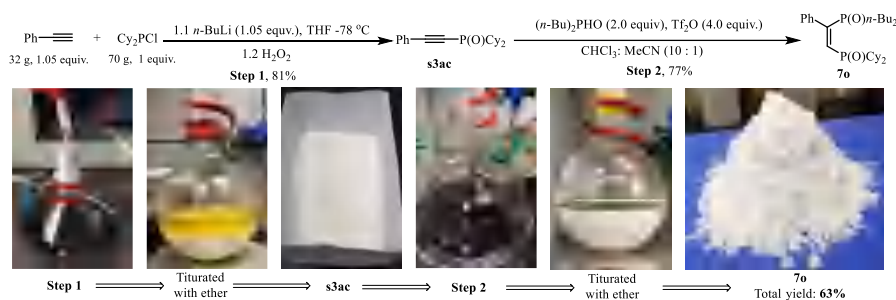

**Step 1 Synthesis of s3ac:** The product of **s3ac** were synthesized according to published procedure.<sup>48</sup> To a flask was added THF (600 mL) and alkyne (32.2 g, 315 mmol, 1.05 equiv), cooled to -78 °C and *n*-BuLi (315 mmol, 1.05 equiv) was added dropwise under Ar. The resulting mixture was stirred and allowed to warm to 0 °C over 20 min, then cooled to -78 °C and chlorodicyclohexylphosphine (69.8 g, 300 mmol, 1.0 equiv) added dropwise. The resulting mixture was allowed to warm to room temperature over 2 h then 30%  $\text{H}_2\text{O}_2$  (50 mL) at 0 °C, and the mixture was stirred under air at r.t. for 2 h. The reaction was quenched with water (200 mL), and the aqueous phase was extracted with ethyl acetate (3 x 200 mL). The combined organic layer was washed with sodium sulfite (50 g in 500 mL water), dried over  $\text{MgSO}_4$ , and the solvent removed under reduced pressure. The resulting mixture was triturated with ether, filtered and washed the filter cake with a minimum amount of ether afforded **s3ac** as white solid (56.6 g, 60% yield). The filtrate was concentrated under reduced pressure. The residue was purified by flash column chromatography on silica gel to give the desired product (76.3 g, 81% overall yield).

**Step 2 Synthesis of 7o:** To a flask equipped with a magnetic stir bar was charged with **s2o** (64.8 g, 400 mmol, 2.0 equiv), **s3ac** (62.8 g, 200 mmol, 1.0 equiv). The flask was evacuated and backfilled with argon (three times) and then  $\text{CHCl}_3$  (1000 mL) and  $\text{CH}_3\text{CN}$  (100 mL) was added sequentially via a syringe. The resulting mixture was stirred until it became a homogeneous solution.  $\text{Tf}_2\text{O}$  (133 mL, 800 mmol, 4.0 equiv) was then added by a syringe. The resulting mixture was stirred for 5 h at 60 °C. After cooled to ambient temperature, sat.  $\text{NaHCO}_3$  aq was added and the resulting mixture was extracted with DCM. The organic layer was washed with brine, and dried over  $\text{MgSO}_4$  and volatiles were removed under reduced pressure. The resulting mixture was triturated with ether, filtered and washed the filter cake with a minimum amount of ether afforded **7o** as white solid (44.7 g, 47% yield). The filtrate was concentrated under reduced pressure. The residue was purified by flash column chromatography on silica gel to give the desired product (73.3 g, 77% overall yield).

### 8.3 Synthesis of 10a – 10v

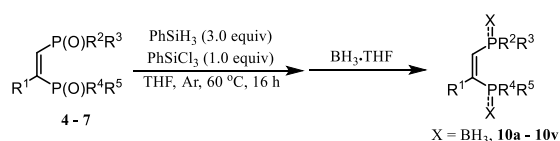

The product of **10a** – **10v** were synthesized according to published procedure.<sup>50</sup> A 10 mL oven-dried sealed tube equipped with a magnetic stir bar was charged with **4** - **7** (0.2 mmol, 1.0 equiv). The tube was evacuated and backfilled with argon (three times) and then THF (1.0 mL), PhSiH<sub>3</sub> (0.6 mmol, 3.0 equiv) and PhSiCl<sub>3</sub> (0.2 mmol, 1.0 equiv) was added sequentially via a syringe. The resulting mixture was stirred for 16 h at 60 °C. After that, the reaction was cooled to room temperature and BH<sub>3</sub> (1 M in THF, 1.1 equiv or 2.2 equiv) was added via syringe under Ar atmosphere. The resulting reaction mixture was stirred at room temperature for 4 h. The reaction was quenched with water (5.0 mL) and the resulting mixture was extracted with ethyl acetate (3 x 10.0 mL). The organic layer was washed with brine, and dried over MgSO<sub>4</sub> and volatiles were removed under reduced pressure. The residue was purified by flash column chromatography on silica gel to give the desired product (20% - 70% yield).

#### 8.4 Synthesis of **10w** and **10z**

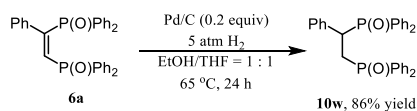

An autoclave equipped with a magnetic stir bar was charged with **6a** (0.2 mmol, 1.0 equiv), Pd/C (0.04 mmol, 0.2 equiv), EtOH (7.0 mL) and THF (7.0 mL). The autoclave was charged with 5 atm H<sub>2</sub>, and the resulting mixture was stirred for 24 h at 65 °C. After that, the reaction was cooled to room temperature and volatiles were removed under reduced pressure. The residue was purified by flash column chromatography on silica gel to give the desired product **10w**.

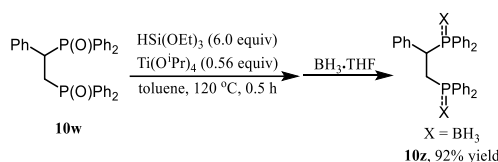

The product of **10z** was synthesized according to published procedure.<sup>51</sup> A 10 mL oven-dried sealed tube equipped with a magnetic stir bar was charged with **10w** (0.2 mmol, 1.0 equiv). The tube was evacuated and backfilled with argon (three times) and then toluene (4.0 mL), HSi(OEt)<sub>3</sub> (1.2 mmol, 6.0 equiv) and Ti(O<sup>*i*</sup>Pr)<sub>4</sub> (0.112 mmol, 0.56 equiv) was added sequentially via a syringe. The resulting mixture was stirred for 0.5 h at 120 °C. After that, the reaction was cooled to room temperature and BH<sub>3</sub> (0.6 mL 1 M in THF, 3.0 equiv) was added via syringe under Ar atmosphere. The resulting reaction mixture was stirred at room temperature for 4 h. After removal of the volatiles under reduced pressure, the residue was purified by flash column chromatography on silica gel to give the desired product **10z**.

#### 8.5 Synthesis of **10x** and **10aa**

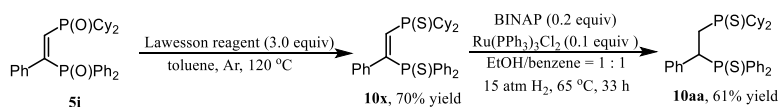

A 10 mL oven-dried sealed tube equipped with a magnetic stir bar was charged with **5i** (0.2 mmol, 1.0 equiv), Lawesson reagent (0.6 mmol, 3.0 equiv). The tube was evacuated and backfilled with argon (three times) and then toluene (1.0 mL) was added via a syringe. The resulting mixture was stirred for 4 h at 120 °C. After that, the reaction was cooled to room temperature and volatiles were removed under reduced pressure. The residue was purified by flash column chromatography on silica gel to give the desired product **10x**.

The product of **10aa** was synthesized according to published procedure.<sup>35</sup> An autoclave equipped with a magnetic stir bar was charged with **10x** (0.2 mmol, 1.0 equiv), BINAP (0.04 mmol, 0.2 equiv), Ru(PPh<sub>3</sub>)<sub>3</sub>Cl<sub>2</sub> (0.02 mmol, 0.1 equiv), EtOH (7.0 mL) and benzene (7.0 mL). The autoclave was charged with 15 atm H<sub>2</sub>, and the resulting mixture was stirred for 33 h at 65 °C. After that, the reaction was cooled to room temperature and volatiles were removed under reduced pressure. The residue was purified by flash column chromatography on silica gel to give the desired product **10aa**.

#### 8.6 Synthesis of **10y**

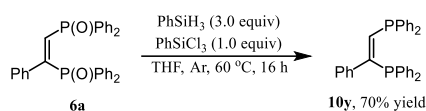

The product of **10y** was synthesized according to published procedure.<sup>50</sup> A 10 mL oven-dried sealed tube equipped with a magnetic stir bar was charged with **6a** (1.0 mmol, 1.0 equiv). The tube was evacuated and backfilled with argon (three times) and then THF (2.0 mL), PhSiH<sub>3</sub> (3.0 mmol, 3.0 equiv) and PhSiCl<sub>3</sub> (1.0 mmol, 1.0 equiv) was added sequentially via a syringe. The resulting mixture was stirred for 16 h at 60 °C. After cooled to room temperature, the reaction was quenched with water (10.0 mL) and the resulting mixture was extracted with ethyl acetate (3 x 15.0 mL). The organic layer was washed with brine, and dried over MgSO<sub>4</sub> and volatiles were removed under reduced pressure. The residue was purified by flash column chromatography on silica gel to give the desired product **10y**.

### 8.7 Synthesis of **10ab** and **10ac**

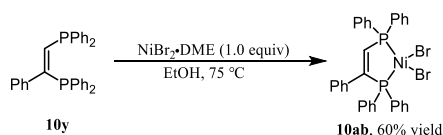

NiBr<sub>2</sub>·DME (0.20 mmol, 1.0 equiv) was placed in a 25 mL reaction flask under argon. Ethanol (5.0 mL) was charged to dissolve the nickel salt at 75 °C. Diphosphine **10y** (0.22 mmol, 1.1 equiv) in ethanol (15.0 mL) was added. Immediately, red precipitate appeared. The precipitate was washed with ether and dried in vacuo. The complex weighed 82.6 mg (60%, unoptimized).

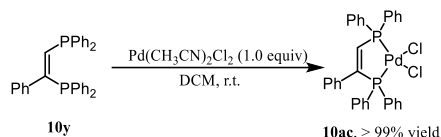

Pd(CH<sub>3</sub>CN)<sub>2</sub>Cl<sub>2</sub> (0.20 mmol, 1.0 equiv) was placed in a 25 mL reaction flask under argon. DCM (5.0 mL) was charged to dissolve the nickel salt. Diphosphine **10y** (0.20 mmol, 1.0 equiv) in DCM (10.0 mL) was added. Immediately, orange precipitate appeared. The resulting mixture was stirred for 30 min at r.t. and volatiles were removed under reduced pressure (> 99 %, unoptimized).



## 9. Catalytic potential of the biphosphine ligands library

To further prove the superiority of our methods, we utilized our disphosphine ligand library (DPPEN type) and currently reported phosphine ligands in optimizing the demanding functional group metathesis reaction which had been reported by Junichiro Yamaguchi group in 2020.<sup>52</sup>

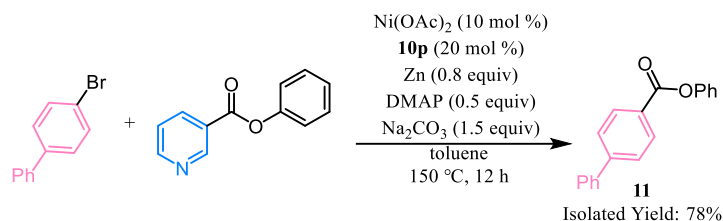

A 10 mL oven-dried sealed tube equipped with a magnetic stir bar, Ni(OAc)<sub>2</sub>·4H<sub>2</sub>O (5.0 mg, 0.020 mmol, 10 mol %) and Na<sub>2</sub>CO<sub>3</sub> (31.8 mg, 0.30 mmol, 1.5 equiv) were dried with a heat-gun in vacuo and filled with Ar after cooling to room temperature. To this vessel were added 4-bromobiphenyl (92.8 mg, 0.40 mmol, 2.0 equiv), phenyl nicotinate (39.8 mg, 0.20 mmol, 1.0 equiv), Zn powder (10.5 mg, 0.16 mmol, 80 mol %), N,N-dimethyl-4-aminopyridine (DMAP; 12.2 mg, 0.10 mmol, 1.0 equiv) and **10p** (0.040 mmol, 20 mol %). The vessel was vacuumed and refilled Ar gas three times. To this was added toluene (0.9 mL). The resulting mixture was stirred for 12 h at 150 °C. After cooling the reaction mixture to room temperature, the mixture was purified by flash column chromatography on silica gel to give the desired product.

## 9.1 Screening of DPPEN type and known phosphine ligands

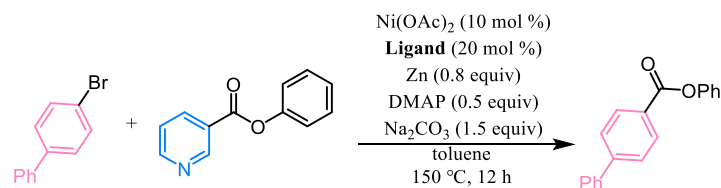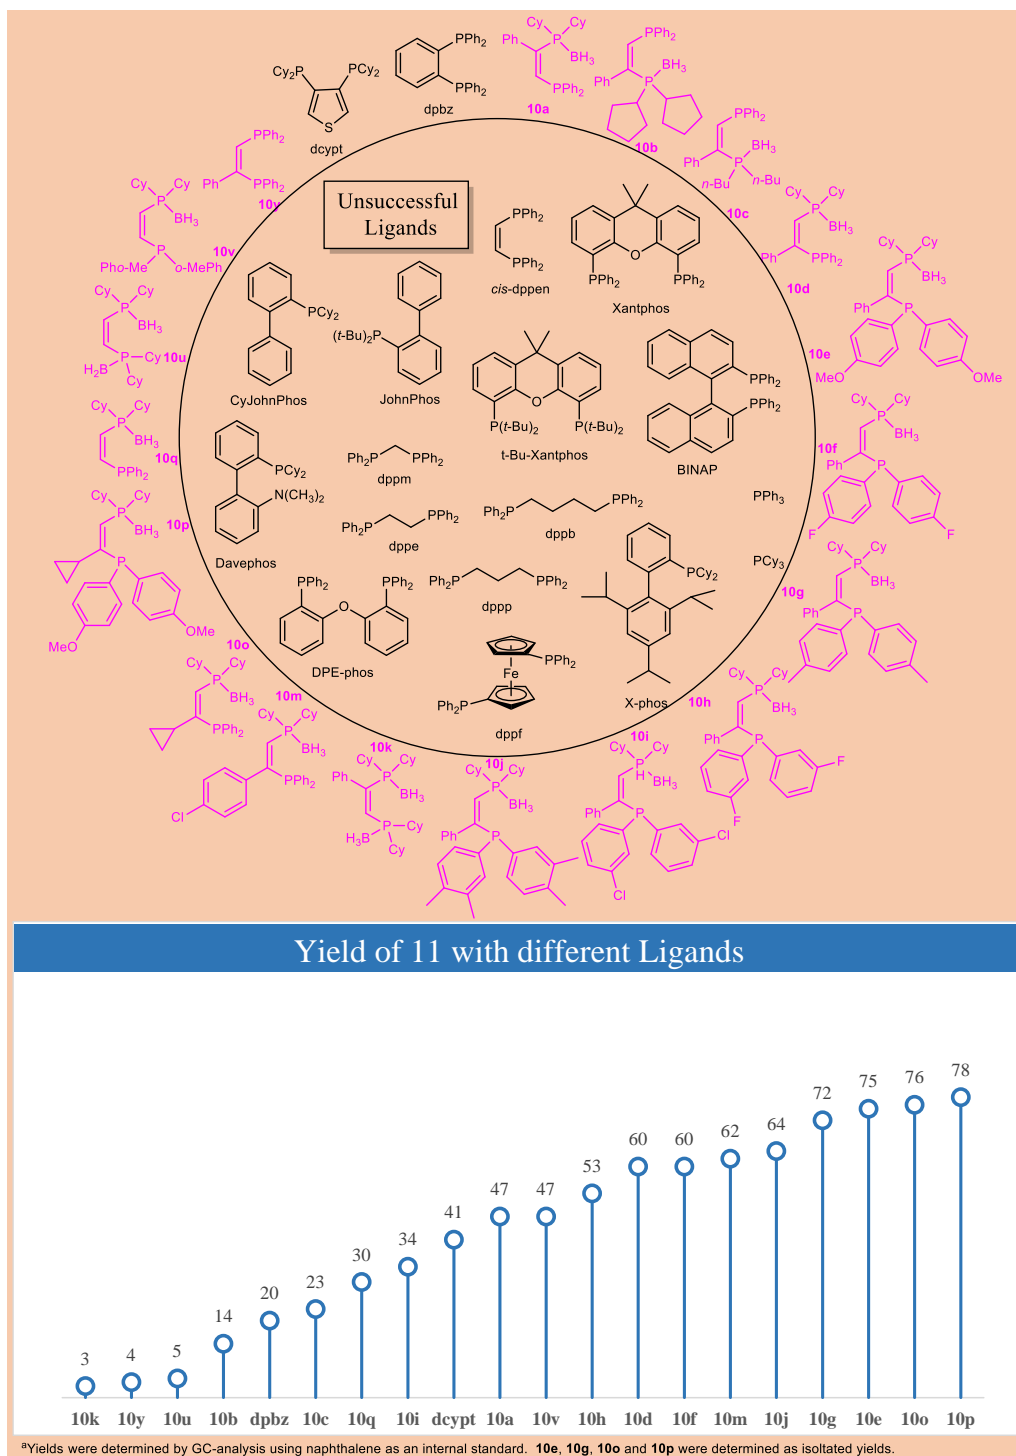

**Figure S8.** Screening of DPPEN type and known phosphine ligands

## 10. X-ray crystal structures

### 10.1 X-ray crystal structure analysis of **6m**

The structure of **6m** was confirmed X-ray analysis (Figure S9). The crystal data of compound **6m** was collected at 293 (2) K with graphite monochromatic Cu K $\alpha$  radiation ( $\lambda = 1.54184 \text{ \AA}$ ). The crystal structures were solved and refined by full matrix least-squares methods against  $F^2$  by using Olex2 programs. Crystallographic data for the structure has been deposited to the Cambridge Crystallographic Data Center (CCDC 2098758).

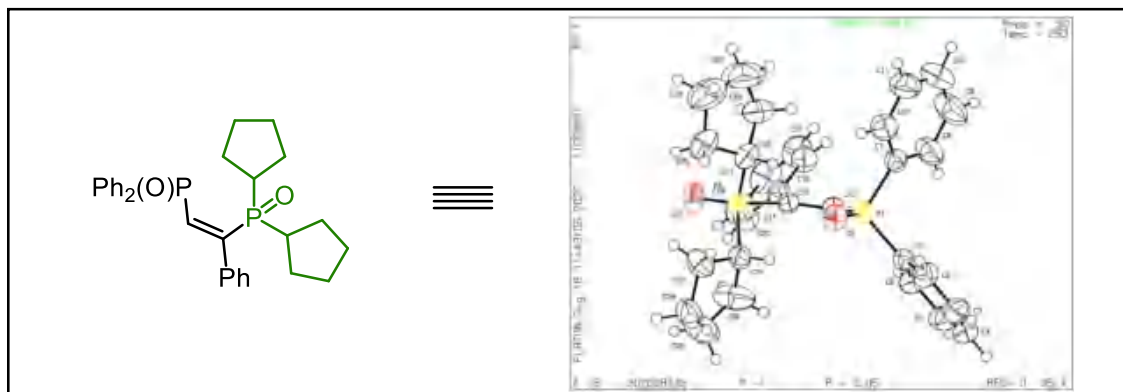

Figure 9. ORTEP drawing of **6m**

Table S7. Crystal data and structure refinement for **6m**

|                                             |                                                               |
|---------------------------------------------|---------------------------------------------------------------|
| Identification code                         | 202008135                                                     |
| Empirical formula                           | C <sub>30</sub> H <sub>34</sub> O <sub>2</sub> P <sub>2</sub> |
| Formula weight                              | 488.51                                                        |
| Temperature/K                               | 293(2)                                                        |
| Crystal system                              | triclinic                                                     |
| Space group                                 | P-1                                                           |
| a/Å                                         | 10.1908(5)                                                    |
| b/Å                                         | 10.8041(7)                                                    |
| c/Å                                         | 13.8826(7)                                                    |
| $\alpha$ /°                                 | 93.707(5)                                                     |
| $\beta$ /°                                  | 106.837(4)                                                    |
| $\gamma$ /°                                 | 111.227(5)                                                    |
| Volume/Å <sup>3</sup>                       | 1338.90(14)                                                   |
| Z                                           | 2                                                             |
| $\rho_{\text{calc}}/\text{cm}^3$            | 1.212                                                         |
| $\mu/\text{mm}^{-1}$                        | 1.656                                                         |
| F(000)                                      | 520.0                                                         |
| Crystal size/mm <sup>3</sup>                | 0.15 × 0.13 × 0.09                                            |
| Radiation                                   | CuK $\alpha$ ( $\lambda = 1.54184$ )                          |
| 2 $\theta$ range for data collection/°      | 8.944 to 134.15                                               |
| Index ranges                                | -12 ≤ h ≤ 12, -12 ≤ k ≤ 12, -14 ≤ l ≤ 16                      |
| Reflections collected                       | 9433                                                          |
| Independent reflections                     | 4768 [R <sub>int</sub> = 0.0320, R <sub>sigma</sub> = 0.0482] |
| Data/restraints/parameters                  | 4768/0/307                                                    |
| Goodness-of-fit on F <sup>2</sup>           | 1.020                                                         |
| Final R indexes [I > 2 $\sigma$ (I)]        | R <sub>1</sub> = 0.0527, wR <sub>2</sub> = 0.1364             |
| Final R indexes [all data]                  | R <sub>1</sub> = 0.0697, wR <sub>2</sub> = 0.1517             |
| Largest diff. peak/hole / e Å <sup>-3</sup> | 0.42/-0.30                                                    |

## 10.2 X-ray crystal structure analysis of 7aw

The structure of **7aw** was confirmed X-ray analysis (Figure S10). The crystal data of compound **7aw** was collected at 293 (2) K with graphite monochromatic Cu K $\alpha$  radiation ( $\lambda = 1.54184 \text{ \AA}$ ). The crystal structures were solved and refined by full matrix least-squares methods against  $F^2$  by using Olex2 programs. Crystallographic data for the structure has been deposited to the Cambridge Crystallographic Data Center (CCDC 2098742).

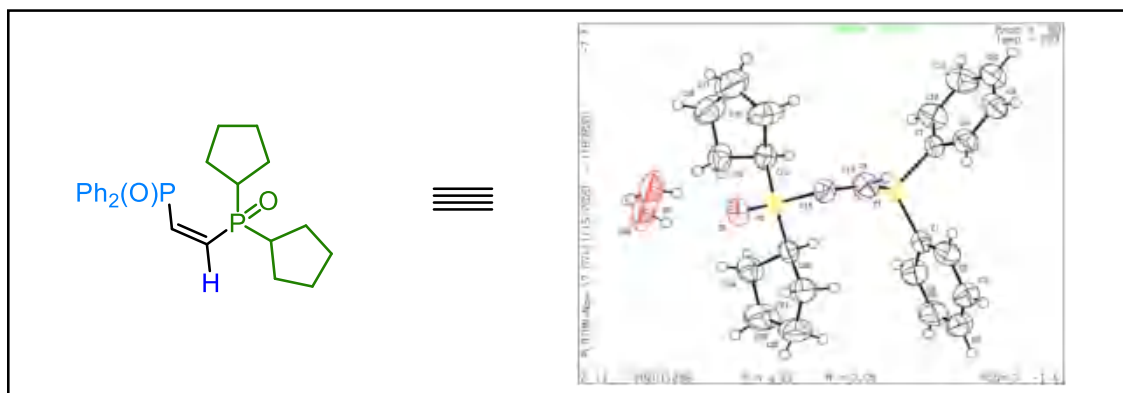

Figure S10. ORTEP drawing of **7aw**

Table S8. Crystal data and structure refinement for **7aw**

|                                                |                                                                  |
|------------------------------------------------|------------------------------------------------------------------|
| Identification code                            | 202011239                                                        |
| Empirical formula                              | C <sub>24</sub> H <sub>32</sub> O <sub>3</sub> P <sub>2</sub>    |
| Formula weight                                 | 430.43                                                           |
| Temperature/K                                  | 293(2)                                                           |
| Crystal system                                 | orthorhombic                                                     |
| Space group                                    | Pna2 <sub>1</sub>                                                |
| a/Å                                            | 22.8622(10)                                                      |
| b/Å                                            | 16.9970(9)                                                       |
| c/Å                                            | 5.9571(3)                                                        |
| $\alpha/^\circ$                                | 90                                                               |
| $\beta/^\circ$                                 | 90                                                               |
| $\gamma/^\circ$                                | 90                                                               |
| Volume/Å <sup>3</sup>                          | 2314.87(19)                                                      |
| Z                                              | 4                                                                |
| $\rho_{\text{calc}}/\text{cm}^3$               | 1.235                                                            |
| $\mu/\text{mm}^{-1}$                           | 1.875                                                            |
| F(000)                                         | 920.0                                                            |
| Crystal size/mm <sup>3</sup>                   | 0.2 × 0.14 × 0.1                                                 |
| Radiation                                      | CuK $\alpha$ ( $\lambda = 1.54184$ )                             |
| 2 $\theta$ range for data collection/ $^\circ$ | 7.734 to 134.15                                                  |
| Index ranges                                   | -27 ≤ h ≤ 27, -14 ≤ k ≤ 20, -5 ≤ l ≤ 7                           |
| Reflections collected                          | 8829                                                             |
| Independent reflections                        | 3106 [ $R_{\text{int}} = 0.0837$ , $R_{\text{sigma}} = 0.0744$ ] |
| Data/restraints/parameters                     | 3106/21/243                                                      |
| Goodness-of-fit on $F^2$                       | 1.089                                                            |
| Final R indexes [ $I > 2\sigma(I)$ ]           | $R_1 = 0.0514$ , $wR_2 = 0.1335$                                 |
| Final R indexes [all data]                     | $R_1 = 0.0791$ , $wR_2 = 0.1697$                                 |
| Largest diff. peak/hole / e Å <sup>-3</sup>    | 0.54/-0.41                                                       |
| Flack parameter                                | 0.02(3)                                                          |

### 10.3 X-ray crystal structure analysis of **8b**

The structure of **8b** was confirmed X-ray analysis (Figure S11). The crystal data of compound **8b** was collected at 293 (2) K with graphite monochromatic Cu K $\alpha$  radiation ( $\lambda = 1.54184 \text{ \AA}$ ). The crystal structures were solved and refined by full matrix least-squares methods against  $F^2$  by using Olex2 programs. Crystallographic data for the structure has been deposited to the Cambridge Crystallographic Data Center (CCDC 2098768).

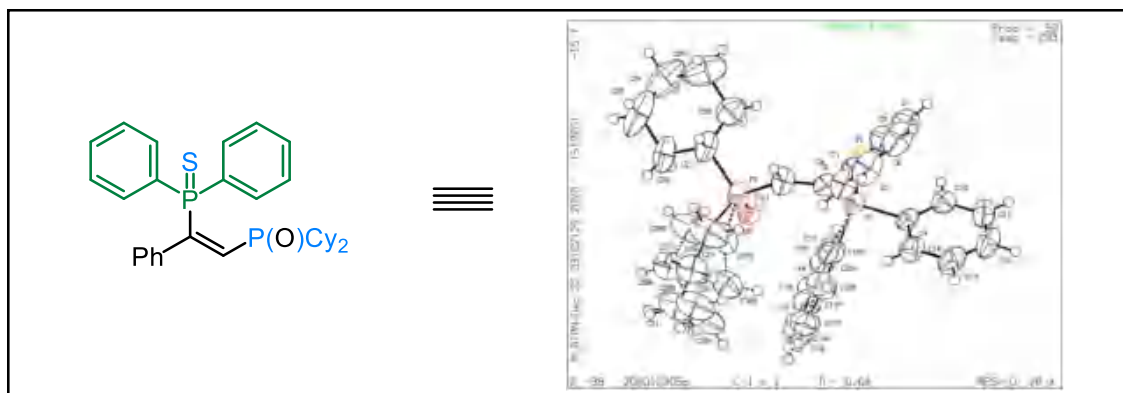

Figure S11. ORTEP drawing of **8b**

Table S9. Crystal data and structure refinement for **8b**

|                                             |                                                               |
|---------------------------------------------|---------------------------------------------------------------|
| Identification code                         | 202012305A                                                    |
| Empirical formula                           | C <sub>32</sub> H <sub>37</sub> OP <sub>2</sub> S             |
| Formula weight                              | 531.61                                                        |
| Temperature/K                               | 293(2)                                                        |
| Crystal system                              | monoclinic                                                    |
| Space group                                 | Cc                                                            |
| a/Å                                         | 11.5958(3)                                                    |
| b/Å                                         | 14.5589(3)                                                    |
| c/Å                                         | 18.0307(4)                                                    |
| $\alpha$ /°                                 | 90                                                            |
| $\beta$ /°                                  | 105.716(2)                                                    |
| $\gamma$ /°                                 | 90                                                            |
| Volume/Å <sup>3</sup>                       | 2930.20(12)                                                   |
| Z                                           | 4                                                             |
| $\rho_{\text{calc}}/\text{cm}^3$            | 1.205                                                         |
| $\mu/\text{mm}^{-1}$                        | 2.175                                                         |
| F(000)                                      | 1132.0                                                        |
| Crystal size/mm <sup>3</sup>                | 0.16 × 0.13 × 0.1                                             |
| Radiation                                   | CuK $\alpha$ ( $\lambda = 1.54184$ )                          |
| 2 $\theta$ range for data collection/°      | 9.986 to 141.742                                              |
| Index ranges                                | -14 ≤ h ≤ 14, -17 ≤ k ≤ 17, -22 ≤ l ≤ 18                      |
| Reflections collected                       | 11219                                                         |
| Independent reflections                     | 4341 [R <sub>int</sub> = 0.0296, R <sub>sigma</sub> = 0.0332] |
| Data/restraints/parameters                  | 4341/147/339                                                  |
| Goodness-of-fit on F <sup>2</sup>           | 1.029                                                         |
| Final R indexes [I > 2 $\sigma$ (I)]        | R <sub>1</sub> = 0.0426, wR <sub>2</sub> = 0.1132             |
| Final R indexes [all data]                  | R <sub>1</sub> = 0.0454, wR <sub>2</sub> = 0.1165             |
| Largest diff. peak/hole / e Å <sup>-3</sup> | 0.29/-0.21                                                    |
| Flack parameter                             | -0.024(14)                                                    |

#### 10.4 X-ray crystal structure analysis of **8j**

The structure of **8j** was confirmed X-ray analysis (Figure S12). The crystal data of compound **8j** was collected at 273.15 K with graphite monochromatic Mo K $\alpha$  radiation ( $\lambda = 0.71073 \text{ \AA}$ ). The crystal structures were solved and refined by full matrix least-squares methods against  $F^2$  by using Olex2 programs. Crystallographic data for the structure has been deposited to the Cambridge Crystallographic Data Center (CCDC 2100843).

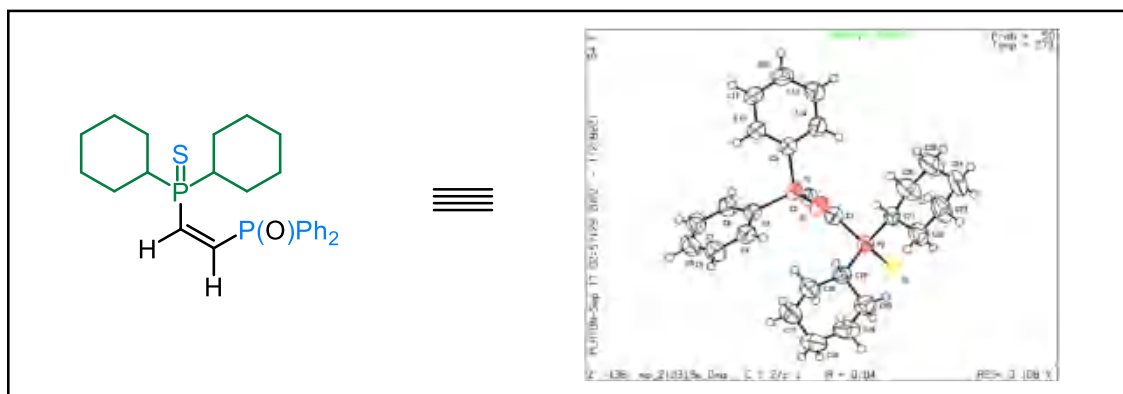

Figure S12. ORTEP drawing of **8j**

Table S10. Crystal data and structure refinement for **8j**

|                                             |                                                                  |
|---------------------------------------------|------------------------------------------------------------------|
| Identification code                         | mo_210313e_0ma                                                   |
| Empirical formula                           | C <sub>26</sub> H <sub>34</sub> OP <sub>2</sub> S                |
| Formula weight                              | 456.53                                                           |
| Temperature/K                               | 273.15                                                           |
| Crystal system                              | monoclinic                                                       |
| Space group                                 | C2/c                                                             |
| a/Å                                         | 22.1014(5)                                                       |
| b/Å                                         | 13.3847(5)                                                       |
| c/Å                                         | 19.0796(6)                                                       |
| $\alpha$ /°                                 | 90                                                               |
| $\beta$ /°                                  | 118.479(2)                                                       |
| $\gamma$ /°                                 | 90                                                               |
| Volume/Å <sup>3</sup>                       | 4961.2(3)                                                        |
| Z                                           | 8                                                                |
| $\rho_{\text{calc}}/\text{cm}^3$            | 1.222                                                            |
| $\mu/\text{mm}^{-1}$                        | 0.275                                                            |
| F(000)                                      | 1952.0                                                           |
| Crystal size/mm <sup>3</sup>                | 0.14 × 0.1 × 0.08                                                |
| Radiation                                   | MoK $\alpha$ ( $\lambda = 0.71073$ )                             |
| 2 $\theta$ range for data collection/°      | 6.088 to 52.744                                                  |
| Index ranges                                | -27 ≤ h ≤ 27, -15 ≤ k ≤ 16, -23 ≤ l ≤ 23                         |
| Reflections collected                       | 60625                                                            |
| Independent reflections                     | 5072 [ $R_{\text{int}} = 0.0728$ , $R_{\text{sigma}} = 0.0283$ ] |
| Data/restraints/parameters                  | 5072/0/271                                                       |
| Goodness-of-fit on $F^2$                    | 1.026                                                            |
| Final R indexes [ $I > 2\sigma(I)$ ]        | $R_1 = 0.0434$ , $wR_2 = 0.1078$                                 |
| Final R indexes [all data]                  | $R_1 = 0.0668$ , $wR_2 = 0.1211$                                 |
| Largest diff. peak/hole / e Å <sup>-3</sup> | 0.41/-0.24                                                       |

### 10.5 X-ray crystal structure analysis of 10d

The structure of **10d** was confirmed X-ray analysis (Figure S13). The crystal data of compound **10d** was collected at 293 (2) K with graphite monochromatic Cu K $\alpha$  radiation ( $\lambda = 1.54184 \text{ \AA}$ ). The crystal structures were solved and refined by full matrix least-squares methods against  $F^2$  by using Olex2 programs. Crystallographic data for the structure has been deposited to the Cambridge Crystallographic Data Center (CCDC 2098738).

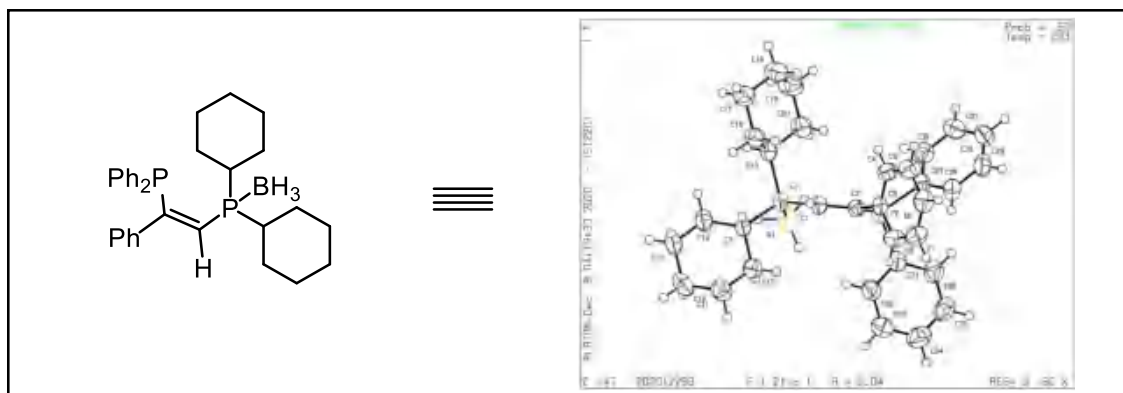

Figure S13. ORTEP drawing of **10d**

Table S11. Crystal data and structure refinement for **10d**

|                                             |                                                               |
|---------------------------------------------|---------------------------------------------------------------|
| Identification code                         | 202012293                                                     |
| Empirical formula                           | C <sub>32</sub> H <sub>41</sub> BP <sub>2</sub>               |
| Formula weight                              | 498.40                                                        |
| Temperature/K                               | 293(2)                                                        |
| Crystal system                              | monoclinic                                                    |
| Space group                                 | P2 <sub>1</sub> /c                                            |
| a/Å                                         | 10.7442(2)                                                    |
| b/Å                                         | 12.9675(3)                                                    |
| c/Å                                         | 20.7744(4)                                                    |
| $\alpha$ /°                                 | 90                                                            |
| $\beta$ /°                                  | 99.080(2)                                                     |
| $\gamma$ /°                                 | 90                                                            |
| Volume/Å <sup>3</sup>                       | 2858.13(11)                                                   |
| Z                                           | 4                                                             |
| $\rho_{\text{calc}}/\text{cm}^3$            | 1.158                                                         |
| $\mu/\text{mm}^{-1}$                        | 1.498                                                         |
| F(000)                                      | 1072.0                                                        |
| Crystal size/mm <sup>3</sup>                | 0.15 × 0.11 × 0.1                                             |
| Radiation                                   | CuK $\alpha$ ( $\lambda = 1.54184$ )                          |
| 2 $\theta$ range for data collection/°      | 8.066 to 134.14                                               |
| Index ranges                                | -12 ≤ h ≤ 8, -15 ≤ k ≤ 14, -24 ≤ l ≤ 24                       |
| Reflections collected                       | 11199                                                         |
| Independent reflections                     | 5089 [R <sub>int</sub> = 0.0345, R <sub>sigma</sub> = 0.0426] |
| Data/restraints/parameters                  | 5089/0/332                                                    |
| Goodness-of-fit on F <sup>2</sup>           | 1.023                                                         |
| Final R indexes [I > 2 $\sigma$ (I)]        | R <sub>1</sub> = 0.0442, wR <sub>2</sub> = 0.1113             |
| Final R indexes [all data]                  | R <sub>1</sub> = 0.0577, wR <sub>2</sub> = 0.1235             |
| Largest diff. peak/hole / e Å <sup>-3</sup> | 0.32/-0.18                                                    |

## 10.6 X-ray crystal structure analysis of 10ab

The structure of **10ab** was confirmed X-ray analysis (Figure S14). The crystal data of compound **10ab** was collected at 293 (2) K with graphite monochromatic Cu K $\alpha$  radiation ( $\lambda = 1.54184 \text{ \AA}$ ). The crystal structures were solved and refined by full matrix least-squares methods against  $F^2$  by using Olex2 programs. Crystallographic data for the structure has been deposited to the Cambridge Crystallographic Data Center (CCDC 2098743).

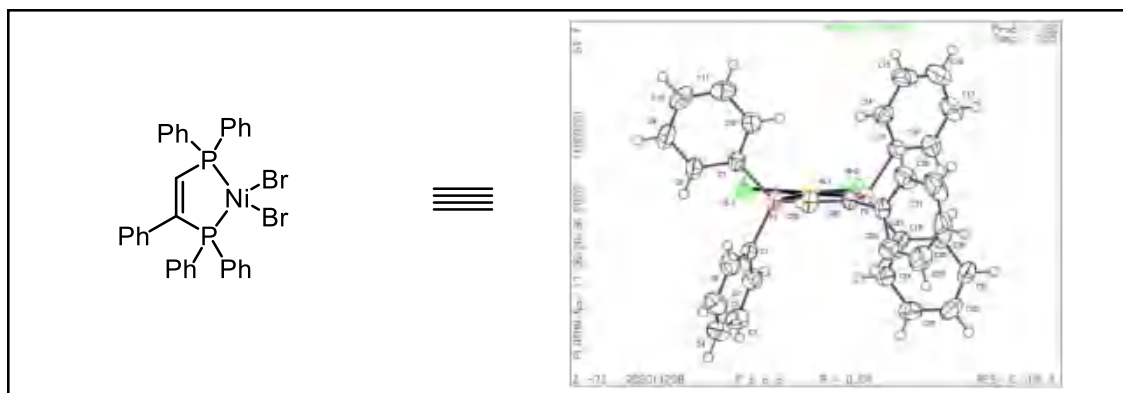

Figure S14. ORTEP drawing of **10ab**

Table S12. Crystal data and structure refinement for **10ab**

|                                                |                                                                    |
|------------------------------------------------|--------------------------------------------------------------------|
| Identification code                            | 202011238                                                          |
| Empirical formula                              | C <sub>32</sub> H <sub>26</sub> Br <sub>2</sub> NiP <sub>2</sub>   |
| Formula weight                                 | 691.00                                                             |
| Temperature/K                                  | 293(2)                                                             |
| Crystal system                                 | orthorhombic                                                       |
| Space group                                    | Pbca                                                               |
| a/ $\text{\AA}$                                | 15.3937(4)                                                         |
| b/ $\text{\AA}$                                | 16.9791(5)                                                         |
| c/ $\text{\AA}$                                | 22.1496(10)                                                        |
| $\alpha/^\circ$                                | 90                                                                 |
| $\beta/^\circ$                                 | 90                                                                 |
| $\gamma/^\circ$                                | 90                                                                 |
| Volume/ $\text{\AA}^3$                         | 5789.3(4)                                                          |
| Z                                              | 8                                                                  |
| $\rho_{\text{calc}}/\text{cm}^3$               | 1.586                                                              |
| $\mu/\text{mm}^{-1}$                           | 5.391                                                              |
| F(000)                                         | 2768.0                                                             |
| Crystal size/ $\text{mm}^3$                    | 0.15 $\times$ 0.1 $\times$ 0.09                                    |
| Radiation                                      | CuK $\alpha$ ( $\lambda = 1.54184$ )                               |
| 2 $\theta$ range for data collection/ $^\circ$ | 7.984 to 134.026                                                   |
| Index ranges                                   | -16 $\leq h \leq 18$ , -20 $\leq k \leq 12$ , -13 $\leq l \leq 26$ |
| Reflections collected                          | 14854                                                              |
| Independent reflections                        | 5159 [R <sub>int</sub> = 0.0368, R <sub>sigma</sub> = 0.0399]      |
| Data/restraints/parameters                     | 5159/0/334                                                         |
| Goodness-of-fit on F <sup>2</sup>              | 1.034                                                              |
| Final R indexes [ $I \geq 2\sigma(I)$ ]        | R <sub>1</sub> = 0.0355, wR <sub>2</sub> = 0.0857                  |
| Final R indexes [all data]                     | R <sub>1</sub> = 0.0490, wR <sub>2</sub> = 0.0951                  |
| Largest diff. peak/hole / e $\text{\AA}^{-3}$  | 0.36/-0.40                                                         |



### 10.7 X-ray crystal structure analysis of 10ac

The structure of **10ac** was confirmed X-ray analysis (Figure S15). The crystal data of compound **10ac** was collected at 273.15 K with graphite monochromatic Mo K $\alpha$  radiation ( $\lambda = 0.71073 \text{ \AA}$ ). The crystal structures were solved and refined by full matrix least-squares methods against  $F^2$  by using Olex2 programs. Crystallographic data for the structure has been deposited to the Cambridge Crystallographic Data Center (CCDC 2098780).

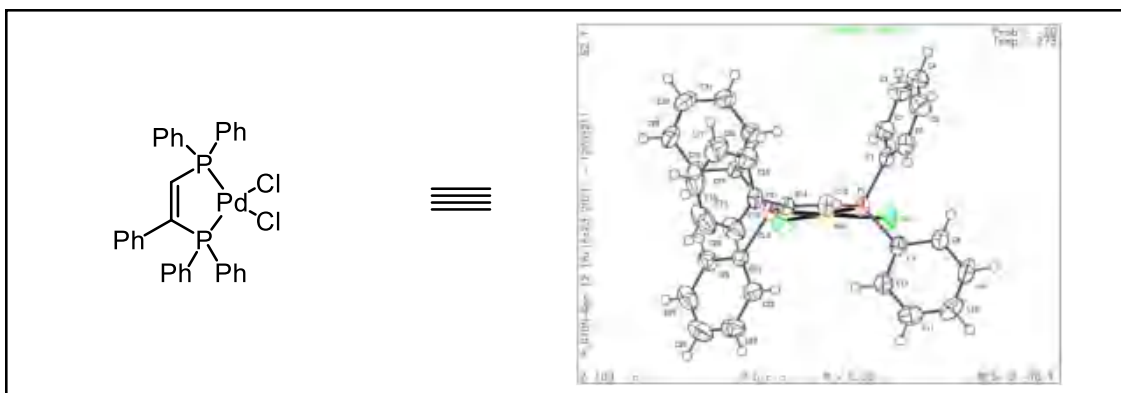

Figure S15. ORTEP drawing of **10ac**

Table S13. Crystal data and structure refinement for **10ac**

|                                                |                                                                   |
|------------------------------------------------|-------------------------------------------------------------------|
| Identification code                            | A                                                                 |
| Empirical formula                              | C <sub>32</sub> H <sub>26</sub> Cl <sub>2</sub> P <sub>2</sub> Pd |
| Formula weight                                 | 649.77                                                            |
| Temperature/K                                  | 273.15                                                            |
| Crystal system                                 | orthorhombic                                                      |
| Space group                                    | Pbca                                                              |
| a/Å                                            | 15.2106(3)                                                        |
| b/Å                                            | 16.9416(4)                                                        |
| c/Å                                            | 22.0596(6)                                                        |
| $\alpha/^\circ$                                | 90                                                                |
| $\beta/^\circ$                                 | 90                                                                |
| $\gamma/^\circ$                                | 90                                                                |
| Volume/Å <sup>3</sup>                          | 5684.6(2)                                                         |
| Z                                              | 8                                                                 |
| $\rho_{\text{calc}}/\text{cm}^3$               | 1.518                                                             |
| $\mu/\text{mm}^{-1}$                           | 0.974                                                             |
| F(000)                                         | 2624.0                                                            |
| Crystal size/mm <sup>3</sup>                   | 0.12 × 0.09 × 0.08                                                |
| Radiation                                      | MoK $\alpha$ ( $\lambda = 0.71073$ )                              |
| 2 $\theta$ range for data collection/ $^\circ$ | 4.044 to 54.948                                                   |
| Index ranges                                   | -16 ≤ h ≤ 19, -21 ≤ k ≤ 21, -28 ≤ l ≤ 28                          |
| Reflections collected                          | 125225                                                            |
| Independent reflections                        | 6503 [R <sub>int</sub> = 0.0605, R <sub>sigma</sub> = 0.0221]     |
| Data/restraints/parameters                     | 6503/0/334                                                        |
| Goodness-of-fit on F <sup>2</sup>              | 1.024                                                             |
| Final R indexes [I > 2 $\sigma$ (I)]           | R <sub>1</sub> = 0.0252, wR <sub>2</sub> = 0.0526                 |
| Final R indexes [all data]                     | R <sub>1</sub> = 0.0432, wR <sub>2</sub> = 0.0583                 |
| Largest diff. peak/hole / e Å <sup>-3</sup>    | 0.31/-0.30                                                        |

## 11. Characteristic data

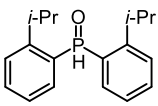 **(s2x)**  $^1\text{H NMR}$  (400 MHz,  $\text{CDCl}_3$ )  $\delta$  8.90 – 7.66 (m, 3H), 7.53 – 7.48 (m, 2H), 7.37 – 7.26 (m, 4H), 3.27 – 3.19 (m, 2H), 1.20 – 0.85 (m, 12H);  $^{13}\text{C NMR}$  (101 MHz,  $\text{CDCl}_3$ )  $\delta$  152.3 (d,  $J = 9.8$  Hz), 132.8 (d,  $J = 2.6$  Hz), 132.2 (d,  $J = 12.5$  Hz), 129.0 (d,  $J = 101.3$  Hz), 126.4 (d,  $J = 10.3$  Hz), 126.2 (d,  $J = 13.1$  Hz), 31.0 (d,  $J = 7.2$  Hz), 23.8, 23.6;  $^{31}\text{P NMR}$  (162 MHz,  $\text{CDCl}_3$ )  $\delta$  17.7. HRMS (ESI) calcd for  $\text{C}_{18}\text{H}_{24}\text{OP}^+$   $[\text{M}+\text{H}]^+$  287.1560, found 287.1553.

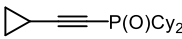 **(s3q)**  $^1\text{H NMR}$  (400 MHz,  $\text{CDCl}_3$ )  $\delta$  1.90 – 1.63 (m, 12H), 1.36 – 1.16 (m, 11H), 0.86 – 0.77 (m, 4H);  $^{13}\text{C NMR}$  (101 MHz,  $\text{CDCl}_3$ )  $\delta$  109.6 (d,  $J = 23.5$  Hz), 67.7 (d,  $J = 143.9$  Hz), 36.6 (d,  $J = 79.7$  Hz), 26.3 (d,  $J = 9.7$  Hz), 26.1 (d,  $J = 9.3$  Hz), 25.8, 25.6 (d,  $J = 3.0$  Hz), 24.6 (d,  $J = 3.1$  Hz), 9.1, 0.0 (d,  $J = 3.3$  Hz);  $^{31}\text{P NMR}$  (162 MHz,  $\text{CDCl}_3$ )  $\delta$  34.3. HRMS (ESI) calcd for  $\text{C}_{17}\text{H}_{28}\text{OP}^+$   $[\text{M}+\text{H}]^+$  279.1873, found 279.1870.

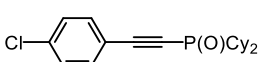 **(s3r)** White solid (m.p.: 143 - 145 °C); 75% yield;  $^1\text{H NMR}$  (400 MHz,  $\text{CDCl}_3$ )  $\delta$  7.45 (d,  $J = 8.4$  Hz, 2H), 7.32 (d,  $J = 8.5$  Hz, 2H), 2.06 – 1.71 (m, 12H), 1.57 – 1.45 (m, 4H), 1.35 – 1.18 (m, 6H);  $^{13}\text{C NMR}$  (101 MHz,  $\text{CDCl}_3$ )  $\delta$  136.5, 133.6 (d,  $J = 1.7$  Hz), 128.9, 118.9 (d,  $J = 3.5$  Hz), 101.8 (d,  $J = 21.0$  Hz), 82.6 (d,  $J = 133.4$  Hz), 36.8 (d,  $J = 79.0$  Hz), 26.3 (d,  $J = 9.7$  Hz), 26.2 (d,  $J = 9.3$  Hz), 25.84 – 25.79 (m), 24.7 (d,  $J = 3.3$  Hz);  $^{31}\text{P NMR}$  (162 MHz,  $\text{CDCl}_3$ )  $\delta$  35.7. HRMS (ESI) calcd for  $\text{C}_{20}\text{H}_{27}\text{ClOP}^+$   $[\text{M}+\text{H}]^+$  349.1483, found 349.1477.

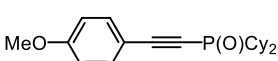 **(s3s)** White solid (m.p.: 86 - 88 °C); 73% yield;  $^1\text{H NMR}$  (400 MHz,  $\text{CDCl}_3$ )  $\delta$  7.46 (d,  $J = 8.8$  Hz, 2H), 6.85 (d,  $J = 8.8$  Hz, 2H), 3.81 (s, 3H), 2.05 – 1.82 (m, 10H), 1.72 – 1.69 (m, 2H), 1.58 – 1.46 (m, 4H), 1.34 – 1.21 (m, 6H);  $^{13}\text{C NMR}$  (101 MHz,  $\text{CDCl}_3$ )  $\delta$  161.0, 134.1 (d,  $J = 1.7$  Hz), 114.2, 112.4 (d,  $J = 3.5$  Hz), 103.6 (d,  $J = 22.4$  Hz), 80.2 (d,  $J = 138.9$  Hz), 55.4, 36.9 (d,  $J = 79.3$  Hz), 26.3 (d,  $J = 9.7$  Hz), 26.2 (d,  $J = 9.3$  Hz), 25.88, 25.87, 25.8 (d,  $J = 3.2$  Hz), 24.8 (d,  $J = 3.3$  Hz);  $^{31}\text{P NMR}$  (162 MHz,  $\text{CDCl}_3$ )  $\delta$  35.2. HRMS (ESI) calcd for  $\text{C}_{21}\text{H}_{30}\text{O}_2\text{P}^+$   $[\text{M}+\text{H}]^+$  345.1978, found 345.1981.

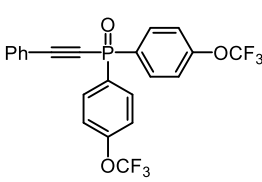 **(s3y)**  $^1\text{H NMR}$  (400 MHz,  $\text{CDCl}_3$ )  $\delta$  7.93 (dd,  $J = 13.2, 8.5$  Hz, 4H), 7.57 (d,  $J = 7.7$  Hz, 2H), 7.45 – 7.31 (m, 7H);  $^{13}\text{C NMR}$  (101 MHz,  $\text{CDCl}_3$ )  $\delta$  152.3 (dd,  $J = 3.2, 1.7$  Hz), 133.0 (d,  $J = 12.6$  Hz), 132.6 (d,  $J = 1.5$  Hz), 131.3 (d,  $J = 125.2$  Hz), 131.1, 128.7, 120.8 (d,  $J = 14.5$  Hz), 120.3 (q,  $J = 260.0$  Hz), 119.3 (d,  $J = 4.1$  Hz), 106.6 (d,  $J = 31.5$  Hz), 81.9 (d,  $J = 175.8$  Hz);  $^{31}\text{P NMR}$  (162 MHz,  $\text{CDCl}_3$ )  $\delta$  5.2;  $^{19}\text{F NMR}$  (376 MHz,  $\text{CDCl}_3$ )  $\delta$  -57.6. HRMS (ESI) calcd for  $\text{C}_{22}\text{H}_{14}\text{F}_6\text{O}_3\text{P}^+$   $[\text{M}+\text{H}]^+$  471.0579, found 471.0585.

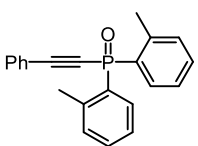 **(s3z)**  $^1\text{H NMR}$  (400 MHz,  $\text{CDCl}_3$ )  $\delta$  8.07 (dd,  $J = 15.6, 7.6$  Hz, 2H), 7.59 (d,  $J = 7.3$  Hz, 2H), 7.49 – 7.24 (m, 9H), 2.45 (s, 6H);  $^{13}\text{C NMR}$  (101 MHz,  $\text{CDCl}_3$ )  $\delta$  141.6 (d,  $J = 10.6$  Hz), 132.8 (d,  $J = 11.9$  Hz), 132.4, 131.7 (d,  $J = 11.8$  Hz), 130.61 (d,  $J = 119.5$  Hz), 130.59, 128.6, 125.8 (d,  $J = 13.5$  Hz), 120.2 (d,  $J = 3.9$  Hz), 104.9 (d,  $J = 29.5$  Hz), 83.2 (d,  $J = 167.9$  Hz), 21.3 (d,  $J = 5.3$  Hz);  $^{31}\text{P NMR}$  (162 MHz,  $\text{CDCl}_3$ )  $\delta$  8.6. HRMS (ESI) calcd for  $\text{C}_{22}\text{H}_{20}\text{OP}^+$   $[\text{M}+\text{H}]^+$  331.1246, found 331.1246.

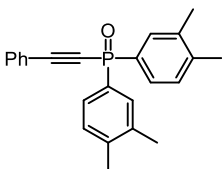 **(s3aa)**  $^1\text{H NMR}$  (400 MHz,  $\text{CDCl}_3$ )  $\delta$  7.71 – 7.59 (m, 6H), 7.44 (t,  $J = 7.6$  Hz, 1H), 7.37 (t,  $J = 7.1$  Hz, 2H), 7.28 – 7.24 (m, 2H), 2.31 (s, 12H);  $^{13}\text{C NMR}$  (101 MHz,  $\text{CDCl}_3$ )  $\delta$  141.5 (d,  $J = 2.9$  Hz), 137.2 (d,  $J = 13.7$  Hz), 132.5 (d,  $J = 1.7$  Hz), 131.9 (d,  $J = 11.4$  Hz), 130.5, 130.3 (d,  $J = 124.3$  Hz), 129.9 (d,  $J = 14.4$  Hz), 128.6 (d,  $J = 11.3$  Hz), 128.5, 120.3 (d,  $J = 3.9$  Hz), 104.7 (d,  $J = 29.7$  Hz), 83.6 (d,  $J = 167.9$  Hz), 20.1, 19.8;  $^{31}\text{P NMR}$  (162 MHz,  $\text{CDCl}_3$ )  $\delta$  8.8. HRMS (ESI) calcd for  $\text{C}_{24}\text{H}_{24}\text{OP}^+$   $[\text{M}+\text{H}]^+$  359.1559, found 359.1559.

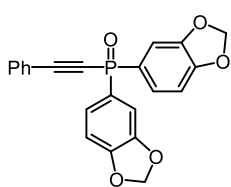

**(s3ab)**  $^1\text{H NMR}$  (400 MHz,  $\text{CDCl}_3$ )  $\delta$  7.56 (d,  $J = 7.3$  Hz, 2H), 7.46 – 7.41 (m, 3H), 7.34 (t,  $J = 7.5$  Hz, 2H), 7.23 (d,  $J = 13.3$  Hz, 2H), 6.89 (d,  $J = 7.6$  Hz, 2H), 5.99 (s, 4H);  $^{13}\text{C NMR}$  (101 MHz,  $\text{CDCl}_3$ )  $\delta$  151.2 (d,  $J = 3.0$  Hz), 148.1 (d,  $J = 20.5$  Hz), 132.5 (d,  $J = 1.4$  Hz), 130.7, 128.6, 126.5 (d,  $J = 12.3$  Hz), 126.2 (d,  $J = 128.6$  Hz), 119.9 (d,  $J = 3.9$  Hz), 110.4 (d,  $J = 14.7$  Hz), 108.8 (d,  $J = 17.0$  Hz), 105.0 (d,  $J = 30.6$  Hz), 101.8, 83.0 (d,  $J = 172.0$  Hz);  $^{31}\text{P NMR}$  (162 MHz,  $\text{CDCl}_3$ )  $\delta$  8.1. HRMS (ESI) calcd for  $\text{C}_{22}\text{H}_{16}\text{O}_5\text{P}^+$

$[\text{M}+\text{H}]^+$  391.0730, found 391.0730.

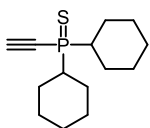

**(s3af)**  $^1\text{H NMR}$  (400 MHz,  $\text{CDCl}_3$ )  $\delta$  3.06 (d,  $J = 8.8$  Hz, 1H), 2.02 – 1.86 (m, 10H), 1.73 – 1.27 (m, 10H), 1.24 – 1.18 (m, 2H);  $^{13}\text{C NMR}$  (101 MHz,  $\text{CDCl}_3$ )  $\delta$  92.6 (d,  $J = 15.5$  Hz), 76.3 (d,  $J = 112.5$  Hz), 38.4 (d,  $J = 58.4$  Hz), 26.3 – 26.0 (m), 25.7 (d,  $J = 1.4$  Hz), 24.8 (d,  $J = 1.8$  Hz);  $^{31}\text{P NMR}$  (162 MHz,  $\text{CDCl}_3$ )  $\delta$  46.1. HRMS (ESI) calcd for  $\text{C}_{14}\text{H}_{24}\text{PS}^+$   $[\text{M}+\text{H}]^+$  255.1331, found 255.1331.

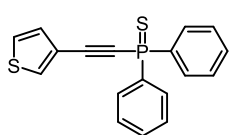

**(s3ai)**  $^1\text{H NMR}$  (400 MHz,  $\text{CDCl}_3$ )  $\delta$  8.02 – 7.95 (m, 4H), 7.74 (d,  $J = 2.8$  Hz, 1H), 7.54 – 7.45 (m, 6H), 7.32 (dd,  $J = 5.0, 3.0$  Hz, 1H), 7.24 (dd,  $J = 5.0, 0.8$  Hz, 1H);  $^{13}\text{C NMR}$  (101 MHz,  $\text{CDCl}_3$ )  $\delta$  133.7 (d,  $J = 99.1$  Hz), 133.1 (d,  $J = 2.5$  Hz), 131.9 (d,  $J = 3.3$  Hz), 130.9 (d,  $J = 12.2$  Hz), 129.9 (d,  $J = 1.3$  Hz), 128.7 (d,  $J = 13.9$  Hz), 126.1, 119.5 (d,  $J = 4.4$  Hz), 101.2 (d,  $J = 27.4$  Hz), 81.8 (d,  $J = 153.9$  Hz);  $^{31}\text{P NMR}$  (162

MHz,  $\text{CDCl}_3$ )  $\delta$  20.3. HRMS (ESI) calcd for  $\text{C}_{18}\text{H}_{14}\text{PS}_2^+$   $[\text{M}+\text{H}]^+$  325.0269, found 325.0266.

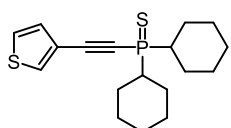

**(s3aj)**  $^1\text{H NMR}$  (400 MHz,  $\text{CDCl}_3$ )  $\delta$  7.65 (s, 1H), 7.31 – 7.29 (m, 1H), 7.17 (d,  $J = 4.7$  Hz, 1H), 2.08 – 1.88 (m, 10H), 1.76 – 1.71 (m, 2H), 1.61 – 1.45 (m, 5H), 1.37 – 1.26 (m, 5H);  $^{13}\text{C NMR}$  (101 MHz,  $\text{CDCl}_3$ )  $\delta$  132.4 (d,  $J = 2.1$  Hz), 130.0, 125.9, 119.8 (d,  $J = 3.8$  Hz), 99.3 (d,  $J = 18.6$  Hz), 79.9 (d,  $J = 121.9$  Hz), 38.9 (d,  $J = 59.2$  Hz), 26.5 – 26.1 (m), 25.8 (d,  $J = 0.9$  Hz), 25.1 (d,  $J = 1.3$  Hz);  $^{31}\text{P NMR}$  (162 MHz,  $\text{CDCl}_3$ )  $\delta$

45.1. HRMS (ESI) calcd for  $\text{C}_{18}\text{H}_{26}\text{PS}_2^+$   $[\text{M}+\text{H}]^+$  337.1208, found 337.1208.

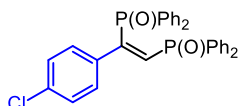

**(4a)** White solid (m.p.: 76 – 78 °C); 82% yield;  $^1\text{H NMR}$  (400 MHz,  $\text{CDCl}_3$ )  $\delta$  7.65 – 7.58 (m, 8H), 7.47 – 7.34 (m, 8H), 7.28 – 7.23 (m, 4H), 7.18 – 7.04 (m, 3H), 7.01 – 6.98 (m, 2H);  $^{13}\text{C NMR}$  (101 MHz,  $\text{CDCl}_3$ )  $\delta$  156.0 (d,  $J = 84.1$  Hz), 141.3 (dd,  $J = 92.2, 8.2$  Hz), 138.8 (dd,  $J = 16.8, 10.2$  Hz), 134.8 (d,  $J = 1.0$  Hz),

133.8 (d,  $J = 108.7$  Hz), 132.3 (d,  $J = 10.1$  Hz), 132.1 (d,  $J = 2.6$  Hz), 131.7 (d,  $J = 2.6$  Hz), 130.84 (d,  $J = 106.2$  Hz), 130.82 (d,  $J = 9.9$  Hz), 129.8 (d,  $J = 3.2$  Hz), 128.5 (d,  $J = 12.5$  Hz), 128.4, 128.2 (d,  $J = 12.7$  Hz);  $^{31}\text{P NMR}$  (162 MHz,  $\text{CDCl}_3$ )  $\delta$  25.6 (d,  $J = 13.3$  Hz), 18.5 (d,  $J = 13.9$  Hz). HRMS (ESI) calcd for  $\text{C}_{32}\text{H}_{26}\text{ClO}_2\text{P}_2^+$   $[\text{M}+\text{H}]^+$  539.1091, found 539.1091.

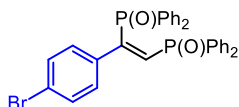

**(4b)** White solid (m.p.: 85 – 87 °C); 87% yield;  $^1\text{H NMR}$  (400 MHz,  $\text{CDCl}_3$ )  $\delta$  7.65 – 7.55 (m, 8H), 7.47 – 7.34 (m, 8H), 7.30 – 7.23 (m, 6H), 7.12 (dd,  $J = 35.6, 19.0$  Hz, 1H), 6.90 (d,  $J = 7.6$  Hz, 2H);  $^{13}\text{C NMR}$  (101 MHz,  $\text{CDCl}_3$ )  $\delta$  156.1 (d,  $J = 84.2$  Hz), 141.4 (dd,  $J = 92.0, 8.1$  Hz), 139.1 (dd,  $J = 16.8, 10.4$  Hz),

133.6 (d,  $J = 108.8$  Hz), 132.3 (d,  $J = 10.3$  Hz), 132.2 (overlap one peak of 132.3), 131.8 (d,  $J = 2.6$  Hz), 131.4, 130.8 (d,  $J = 9.7$  Hz), 130.7 (d,  $J = 106.3$  Hz), 130.0 (d,  $J = 3.2$  Hz), 128.6 (d,  $J = 12.5$  Hz), 128.2 (d,  $J = 12.6$  Hz), 123.0 (d,  $J = 1.1$  Hz);  $^{31}\text{P NMR}$  (162 MHz,  $\text{CDCl}_3$ )  $\delta$  25.6 (d,  $J = 13.8$  Hz), 18.7 (d,  $J = 13.9$  Hz). HRMS (ESI) calcd for  $\text{C}_{32}\text{H}_{26}\text{BrO}_2\text{P}_2^+$   $[\text{M}+\text{H}]^+$  583.0586, found 583.0583.

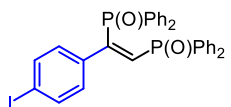

**(4c)** Light yellow solid (m.p.: 100 – 102 °C); 83% yield;  $^1\text{H NMR}$  (400 MHz,  $\text{CDCl}_3$ )  $\delta$  7.65 (dd,  $J = 12.1, 7.8$  Hz, 4H), 7.57 (dd,  $J = 12.2, 7.8$  Hz, 4H), 7.51 – 7.36 (m, 10H), 7.29 – 7.26 (m, 4H), 7.13 (dd,  $J = 35.6, 19.4$  Hz, 1H), 6.76 (d,  $J = 8.1$  Hz, 2H);  $^{13}\text{C NMR}$  (101 MHz,  $\text{CDCl}_3$ )  $\delta$  156.3 (d,  $J = 84.2$  Hz), 141.5 (dd,  $J = 92.0, 8.0$  Hz), 139.6 (dd,  $J = 16.6, 10.3$  Hz), 137.3, 133.5 (d,  $J = 109.0$  Hz), 132.3 – 132.2 (m), 131.8 (d,  $J = 2.3$  Hz), 130.8 (d,  $J = 9.9$  Hz), 130.6 (d,  $J = 104.6$  Hz) (overlap one peak of 130.1), 130.1 (d,  $J = 3.3$  Hz), 128.6 (d,  $J = 12.5$  Hz), 128.3 (d,  $J = 12.6$  Hz),

128.3 (d,  $J = 12.6$  Hz), 128.3 (d,  $J = 12.6$  Hz), 128.3 (d,  $J = 12.6$  Hz), 128.3 (d,  $J = 12.6$  Hz), 128.3 (d,  $J = 12.6$  Hz), 128.3 (d,  $J = 12.6$  Hz), 128.3 (d,  $J = 12.6$  Hz), 128.3 (d,  $J = 12.6$  Hz), 128.3 (d,  $J = 12.6$  Hz), 128.3 (d,  $J = 12.6$  Hz).

94.8;  $^{31}\text{P}$  NMR (162 MHz,  $\text{CDCl}_3$ )  $\delta$  25.6 (d,  $J = 13.9$  Hz), 18.8 (d,  $J = 13.9$  Hz). HRMS (ESI) calcd for  $\text{C}_{32}\text{H}_{26}\text{IO}_2\text{P}_2^+$   $[\text{M}+\text{H}]^+$  631.0447, found 631.0447.

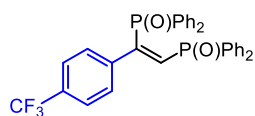

**(4d)** Colorless oil; 76% yield;  $^1\text{H}$  NMR (400 MHz,  $\text{CDCl}_3$ )  $\delta$  7.73 (dd,  $J = 12.4, 7.8$  Hz, 4H), 7.64 (dd,  $J = 12.1, 7.7$  Hz, 4H), 7.51 – 7.40 (m, 10H), 7.33 – 7.29 (m, 4H), 7.26 (d,  $J = 8.0$  Hz, 2H), 7.15 (dd,  $J = 35.6, 18.6$  Hz, 1H);  $^{13}\text{C}$  NMR (101 MHz,  $\text{CDCl}_3$ )  $\delta$  156.1 (d,  $J = 83.3$  Hz), 144.3 (dd,  $J = 16.6, 9.2$  Hz), 141.4 (dd,  $J = 91.8, 8.1$  Hz), 133.7 (d,  $J = 108.3$  Hz), 132.5 (d,  $J = 10.3$  Hz), 132.1 (d,  $J = 2.8$  Hz), 131.7 (d,  $J = 2.7$  Hz), 130.9 (d,  $J = 106.4$  Hz), 130.8 (d,  $J = 9.7$  Hz), 130.4 (q,  $J = 32.8$  Hz) (overlap one peak of 130.8), 128.8 (d,  $J = 2.9$  Hz), 128.5 (d,  $J = 12.4$  Hz), 128.1 (d,  $J = 12.9$  Hz), 125.1 (q,  $J = 3.7$  Hz), 123.8 (q,  $J = 273.2$  Hz);  $^{31}\text{P}$  NMR (162 MHz,  $\text{CDCl}_3$ )  $\delta$  25.7 (d,  $J = 13.8$  Hz), 17.7 (d,  $J = 14.0$  Hz);  $^{19}\text{F}$  NMR (376 MHz,  $\text{CDCl}_3$ )  $\delta$  -62.7. HRMS (ESI) calcd for  $\text{C}_{33}\text{H}_{26}\text{F}_3\text{O}_2\text{P}_2^+$   $[\text{M}+\text{H}]^+$  573.1355, found 573.1356.

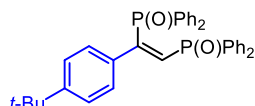

**(4e)** White solid (m.p.: 94 - 96 °C); 86% yield;  $^1\text{H}$  NMR (400 MHz,  $\text{CDCl}_3$ )  $\delta$  7.67 – 7.61 (m, 4H), 7.54 – 7.49 (m, 4H), 7.47 – 7.33 (m, 8H), 7.26 – 7.06 (m, 7H), 6.89 (d,  $J = 7.8$  Hz, 2H), 1.22 (s, 9H);  $^{13}\text{C}$  NMR (101 MHz,  $\text{CDCl}_3$ )  $\delta$  157.3 (d,  $J = 84.5$  Hz), 152.0, 140.6 (dd,  $J = 93.1, 8.2$  Hz), 137.1 (dd,  $J = 16.5, 10.8$  Hz), 133.9 (d,  $J = 108.9$  Hz), 132.2 (d,  $J = 9.9$  Hz), 132.1 (d,  $J = 2.6$  Hz), 131.7 (d,  $J = 2.4$  Hz), 130.9 (d,  $J = 106.1$  Hz), 130.8 (d,  $J = 9.8$  Hz), 128.6 (d,  $J = 12.4$  Hz), 128.2 (d,  $J = 12.5$  Hz), 128.1 (d,  $J = 3.5$  Hz), 125.2, 34.6, 31.2;  $^{31}\text{P}$  NMR (162 MHz,  $\text{CDCl}_3$ )  $\delta$  26.1 (d,  $J = 14.2$  Hz), 19.0 (d,  $J = 14.4$  Hz). HRMS (ESI) calcd for  $\text{C}_{36}\text{H}_{35}\text{O}_2\text{P}_2^+$   $[\text{M}+\text{H}]^+$  561.2107, found 561.2106.

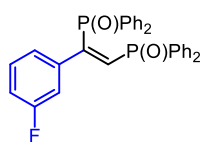

**(4f)** White solid (m.p.: 62 - 64 °C); 71% yield;  $^1\text{H}$  NMR (400 MHz,  $\text{CDCl}_3$ )  $\delta$  7.68 – 7.62 (m, 8H), 7.47 – 7.35 (m, 8H), 7.30 – 7.25 (m, 4H), 7.19 – 7.06 (m, 2H), 6.94 – 6.86 (m, 2H), 6.79 (d,  $J = 9.5$  Hz, 1H);  $^{13}\text{C}$  NMR (101 MHz,  $\text{CDCl}_3$ )  $\delta$  162.1 (d,  $J = 248.6$  Hz), 155.8 (d,  $J = 83.8$  Hz), 142.7 – 142.4 (m), 141.5 (dd,  $J = 92.3, 8.2$  Hz), 134.0 (d,  $J = 108.4$  Hz), 132.4 (d,  $J = 10.2$  Hz), 132.0 (d,  $J = 2.7$  Hz), 131.6 (d,  $J = 2.5$  Hz), 131.1 (d,  $J = 106.2$  Hz), 130.9 (d,  $J = 9.7$  Hz), 129.8 (d,  $J = 8.4$  Hz), 128.5 (d,  $J = 12.4$  Hz), 128.1 (d,  $J = 12.7$  Hz), 124.3 – 124.2 (m), 115.7 – 115.2 (m);  $^{31}\text{P}$  NMR (162 MHz,  $\text{CDCl}_3$ )  $\delta$  25.2 (d,  $J = 13.6$  Hz), 18.0 (d,  $J = 13.8$  Hz);  $^{19}\text{F}$  NMR (376 MHz,  $\text{CDCl}_3$ )  $\delta$  -112.3. HRMS (ESI) calcd for  $\text{C}_{32}\text{H}_{26}\text{FO}_2\text{P}_2^+$   $[\text{M}+\text{H}]^+$  523.1387, found 523.1384.

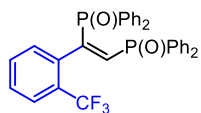

**(4g)** Colorless oil; 74% yield;  $^1\text{H}$  NMR (400 MHz,  $\text{CDCl}_3$ )  $\delta$  7.71 – 7.64 (m, 8H), 7.50 – 7.38 (m, 9H), 7.36 – 7.27 (m, 6H), 7.24 (s, 1H), 7.16 (dd,  $J = 35.3, 18.2$  Hz, 1H);  $^{13}\text{C}$  NMR (101 MHz,  $\text{CDCl}_3$ )  $\delta$  155.8 (d,  $J = 83.6$  Hz), 142.0 (dd,  $J = 91.6, 8.0$  Hz), 141.2 (dd,  $J = 16.8, 10.2$  Hz), 133.7 (d,  $J = 108.5$  Hz), 132.3 (d,  $J = 10.0$  Hz), 132.1 (d,  $J = 2.7$  Hz), 131.8, 131.7 (d,  $J = 2.7$  Hz), 130.93 (d,  $J = 106.3$  Hz), 130.91 (d,  $J = 9.9$  Hz), 130.4 (q,  $J = 32.7$  Hz) (overlap one peak of 130.91), 128.8, 128.5 (d,  $J = 12.5$  Hz), 128.2 (d,  $J = 12.7$  Hz), 125.2 - 125.1 (m), 123.6 (q,  $J = 273.6$  Hz);  $^{31}\text{P}$  NMR (162 MHz,  $\text{CDCl}_3$ )  $\delta$  25.2 (d,  $J = 13.9$  Hz), 18.3 (d,  $J = 13.9$  Hz);  $^{19}\text{F}$  NMR (376 MHz,  $\text{CDCl}_3$ )  $\delta$  -62.7. HRMS (ESI) calcd for  $\text{C}_{33}\text{H}_{26}\text{F}_3\text{O}_2\text{P}_2^+$   $[\text{M}+\text{H}]^+$  573.1355, found 573.1355.

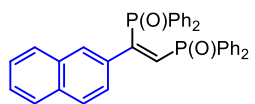

**(4h)** White solid (m.p.: 107 - 109 °C); 91% yield;  $^1\text{H}$  NMR (400 MHz,  $\text{CDCl}_3$ )  $\delta$  7.77 – 7.72 (m, 5H), 7.65 – 7.58 (m, 6H), 7.50 – 7.39 (m, 11H), 7.34 – 7.20 (m, 5H), 7.11 (d,  $J = 8.5$  Hz, 1H);  $^{13}\text{C}$  NMR (101 MHz,  $\text{CDCl}_3$ )  $\delta$  157.2 (d,  $J = 84.4$  Hz), 141.7 (dd,  $J = 92.7, 8.1$  Hz), 137.5 (dd,  $J = 16.4, 10.5$  Hz), 134.0 (d,  $J = 109.0$  Hz), 132.8, 132.5, 132.3 (d,  $J = 9.9$  Hz), 132.1 (d,  $J = 2.4$  Hz), 131.7 (d,  $J = 2.5$  Hz), 131.0 (d,  $J = 106.0$  Hz), 130.9 (d,  $J = 9.9$  Hz), 128.6 (d,  $J = 12.5$  Hz), 128.24 (d,  $J = 12.5$  Hz), 128.18 (overlap one peak of 128.24), 127.9, 127.8 (d,  $J = 4.1$  Hz), 127.6, 126.9, 126.7, 125.9 (d,  $J = 2.7$  Hz);  $^{31}\text{P}$  NMR (162 MHz,  $\text{CDCl}_3$ )  $\delta$  25.3 (d,  $J = 14.0$  Hz), 19.2 (d,  $J = 14.0$  Hz). HRMS (ESI) calcd for  $\text{C}_{36}\text{H}_{29}\text{O}_2\text{P}_2^+$   $[\text{M}+\text{H}]^+$  555.1637, found 555.1637.

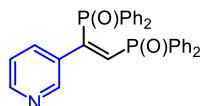

**(4i)** Yellow oil; 85% yield;  $^1\text{H}$  NMR (400 MHz,  $\text{CDCl}_3$ )  $\delta$  8.45 (d,  $J = 4.5$  Hz, 1H), 8.37 (s, 1H), 7.73 – 7.68 (m, 4H), 7.63 – 7.58 (m, 4H), 7.50 (d,  $J = 7.9$  Hz, 1H), 7.46 – 7.34 (m, 8H), 7.27 (td,  $J = 7.8, 3.3$  Hz, 4H), 7.21 – 7.07 (m, 2H);  $^{13}\text{C}$  NMR (101 MHz,  $\text{CDCl}_3$ )  $\delta$  153.6 (d,  $J = 84.0$  Hz), 149.4, 148.4 (d,  $J = 3.5$  Hz), 141.8 (dd,

$J = 91.5, 8.1$  Hz), 136.8 (dd,  $J = 16.7, 9.5$  Hz), 136.1 (d,  $J = 2.4$  Hz), 133.6 (d,  $J = 108.2$  Hz), 132.5 (d,  $J = 10.3$  Hz), 132.1 (d,  $J = 2.8$  Hz), 131.7 (d,  $J = 2.6$  Hz), 130.78 (d,  $J = 9.9$  Hz), 130.77 (d,  $J = 106.5$  Hz), 128.6 (d,  $J = 12.5$  Hz), 128.2 (d,  $J = 12.8$  Hz), 122.6;  $^{31}\text{P}$  NMR (162 MHz,  $\text{CDCl}_3$ )  $\delta$  26.0 (d,  $J = 13.9$  Hz), 17.7 (d,  $J = 13.5$  Hz). HRMS (ESI) calcd for  $\text{C}_{31}\text{H}_{26}\text{NO}_2\text{P}_2^+$   $[\text{M}+\text{H}]^+$  506.1433, found 506.1434.

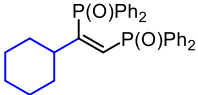 **(4j)** Colorless oil; 62% yield;  $^1\text{H}$  NMR (400 MHz,  $\text{CDCl}_3$ )  $\delta$  7.70 (dd,  $J = 12.3, 7.4$  Hz, 4H), 7.55 (dd,  $J = 12.0, 7.2$  Hz, 4H), 7.44 – 7.39 (m, 4H), 7.37 – 7.27 (m, 8H), 7.01 (dd,  $J = 40.2, 17.7$  Hz, 1H), 2.88 – 2.79 (m, 1H), 1.75 – 1.63 (m, 5H), 1.21 – 1.11 (m, 5H);  $^{13}\text{C}$  NMR (101 MHz,  $\text{CDCl}_3$ )  $\delta$  162.9 (d,  $J = 82.6$  Hz), 134.53 (dd,  $J = 107.8, 8.1$  Hz), 134.48 (d,  $J = 107.5$  Hz), 132.5 (d,  $J = 10.3$  Hz), 131.8 (d,  $J = 2.8$  Hz), 131.6 (d,  $J = 104.4$  Hz), 131.3 (d,  $J = 2.5$  Hz), 130.7 (d,  $J = 9.8$  Hz), 128.3 (d,  $J = 12.3$  Hz), 127.9 (d,  $J = 12.5$  Hz), 43.0 (dd,  $J = 13.4, 10.2$  Hz), 34.09, 34.07, 26.5, 25.8;  $^{31}\text{P}$  NMR (162 MHz,  $\text{CDCl}_3$ )  $\delta$  28.9 (d,  $J = 19.7$  Hz), 19.0 (d,  $J = 19.4$  Hz). HRMS (ESI) calcd for  $\text{C}_{32}\text{H}_{33}\text{O}_2\text{P}_2^+$   $[\text{M}+\text{H}]^+$  511.1950, found 511.1951.

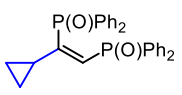 **(4k)** White solid (m.p.: 77 - 79 °C); 75% yield;  $^1\text{H}$  NMR (400 MHz,  $\text{CDCl}_3$ )  $\delta$  7.66 – 7.60 (m, 8H), 7.46 – 7.31 (m, 12H), 6.62 (dd,  $J = 37.6, 15.2$  Hz, 1H), 1.78 – 1.69 (m, 1H), 0.85 – 0.80 (m, 2H), 0.67 – 0.63 (m, 2H);  $^{13}\text{C}$  NMR (101 MHz,  $\text{CDCl}_3$ )  $\delta$  158.9 (d,  $J = 86.5$  Hz), 134.3 (d,  $J = 108.9$  Hz), 132.2 – 130.8 (m), 128.2 (d,  $J = 12.5$  Hz), 18.4 (t,  $J = 17.1$  Hz), 11.2 (d,  $J = 2.7$  Hz);  $^{31}\text{P}$  NMR (162 MHz,  $\text{CDCl}_3$ )  $\delta$  28.5 (d,  $J = 16.4$  Hz), 20.7 (d,  $J = 16.7$  Hz). HRMS (ESI) calcd for  $\text{C}_{29}\text{H}_{27}\text{O}_2\text{P}_2^+$   $[\text{M}+\text{H}]^+$  469.1481, found 469.1472.

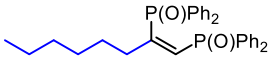 **(4l)** Colorless oil; 67% yield;  $^1\text{H}$  NMR (400 MHz,  $\text{CDCl}_3$ )  $\delta$  7.70 (dd,  $J = 12.4, 7.3$  Hz, 4H), 7.57 – 7.53 (m, 4H), 7.40 – 7.37 (m, 4H), 7.33 – 7.24 (m, 8H), 6.97 (dd,  $J = 38.9, 18.1$  Hz, 1H), 2.57 – 2.5 (m, 2H), 1.43 – 1.36 (m, 2H), 1.21 – 1.08 (m, 6H), 0.77 (t,  $J = 6.7$  Hz, 3H);  $^{13}\text{C}$  NMR (101 MHz,  $\text{CDCl}_3$ )  $\delta$  157.6 (d,  $J = 83.6$  Hz), 136.0 (dd,  $J = 98.1, 8.6$  Hz), 134.1 (d,  $J = 107.6$  Hz), 132.3 (d,  $J = 10.3$  Hz), 131.8 (d,  $J = 2.7$  Hz), 131.4 (d,  $J = 102.1$  Hz) (overlap one peak of 130.8), 131.3 (d,  $J = 2.5$  Hz), 130.8 (d,  $J = 9.8$  Hz), 128.3 (d,  $J = 12.3$  Hz), 128.0 (d,  $J = 12.6$  Hz), 37.9 (dd,  $J = 14.9, 10.4$  Hz), 31.4, 29.3 (d,  $J = 3.2$  Hz), 28.7, 22.5, 14.0;  $^{31}\text{P}$  NMR (162 MHz,  $\text{CDCl}_3$ )  $\delta$  28.1 (d,  $J = 17.2$  Hz), 18.7 (d,  $J = 17.7$  Hz). HRMS (ESI) calcd for  $\text{C}_{32}\text{H}_{35}\text{O}_2\text{P}_2^+$   $[\text{M}+\text{H}]^+$  513.2107, found 513.2107.

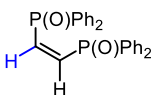 **(4m)** White solid (m.p.: 226 - 228 °C); 48% yield;  $^1\text{H}$  NMR (400 MHz,  $\text{CDCl}_3$ )  $\delta$  7.70 – 7.65 (m, 8H), 7.46 (t,  $J = 7.0$  Hz, 4H), 7.38 – 7.21 (m, 10H) (overlap one peak of 7.26);  $^{13}\text{C}$  NMR (101 MHz,  $\text{CDCl}_3$ )  $\delta$  143.1 (dd,  $J = 96.6, 4.1$  Hz), 133.0 – 131.2 (m), 128.6 – 128.2 (m);  $^{31}\text{P}$  NMR (162 MHz,  $\text{CDCl}_3$ )  $\delta$  20.7.

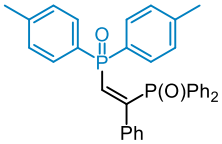 **(5a)** White solid (m.p.: 76 - 77 °C); 97% yield;  $^1\text{H}$  NMR (400 MHz,  $\text{CDCl}_3$ )  $\delta$  7.64 – 7.59 (m, 4H), 7.54 (dd,  $J = 12.0, 8.0$  Hz, 4H), 7.41 – 7.36 (m, 2H), 7.27 – 7.03 (m, 14H), 2.34 (s, 6H);  $^{13}\text{C}$  NMR (101 MHz,  $\text{CDCl}_3$ )  $\delta$  156.1 (d,  $J = 84.5$  Hz), 141.8 (d,  $J = 2.8$  Hz), 141.7 (dd,  $J = 92.4, 8.4$  Hz), 140.6 (dd,  $J = 16.3, 10.2$  Hz), 132.3 (d,  $J = 10.1$  Hz), 131.8 (d,  $J = 67.5$  Hz), 131.7 (d,  $J = 2.7$  Hz), 131.0 (d,  $J = 10.2$  Hz), 130.7 (d,  $J = 69.9$  Hz), 129.1 (d,  $J = 12.9$  Hz), 128.37 – 128.35 (m), 128.1, 128.0 (d,  $J = 12.7$  Hz), 21.6;  $^{31}\text{P}$  NMR (162 MHz,  $\text{CDCl}_3$ )  $\delta$  25.3 (d,  $J = 14.0$  Hz), 18.9 (d,  $J = 14.0$  Hz). HRMS (ESI) calcd for  $\text{C}_{34}\text{H}_{31}\text{O}_2\text{P}_2^+$   $[\text{M}+\text{H}]^+$  533.1794, found 533.1794.

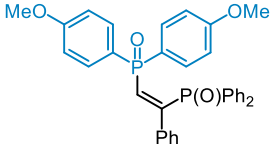 **(5b)** White solid (m.p.: 151 - 153 °C); 90% yield;  $^1\text{H}$  NMR (400 MHz,  $\text{CDCl}_3$ )  $\delta$  7.66 – 7.60 (m, 8H), 7.42 (t,  $J = 7.3$  Hz, 2H), 7.31 – 7.27 (m, 4H) (overlap one peak of 7.26), 7.25 – 7.06 (m, 6H), 6.89 (d,  $J = 8.5$  Hz, 4H), 3.83 (s, 6H);  $^{13}\text{C}$  NMR (101 MHz,  $\text{CDCl}_3$ )  $\delta$  162.1 (d,  $J = 2.8$  Hz), 155.3 (d,  $J = 84.9$  Hz), 142.3 (dd,  $J = 92.9, 8.5$  Hz), 140.8 (dd,  $J = 16.5, 10.3$  Hz), 133.0 (d,  $J = 11.2$  Hz), 132.3 (d,  $J = 10.0$  Hz), 131.9 (d,  $J = 105.7$  Hz), 131.7 (d,  $J = 2.6$  Hz), 128.4 (d,  $J = 3.3$  Hz), 128.2, 128.1, 127.9 (d,  $J = 12.6$  Hz), 125.3 (d,  $J = 114.8$  Hz), 113.9 (d,  $J = 13.4$  Hz), 55.3;  $^{31}\text{P}$  NMR (162 MHz,  $\text{CDCl}_3$ )  $\delta$  25.1 (d,  $J = 14.1$  Hz), 19.1 (d,  $J = 14.1$  Hz). HRMS (ESI) calcd for  $\text{C}_{34}\text{H}_{31}\text{O}_4\text{P}_2^+$   $[\text{M}+\text{H}]^+$  565.1692, found 565.1692.

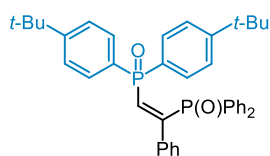

**(5c)** White solid (m.p.: 122 - 124 °C); 76% yield;  $^1\text{H NMR}$  (400 MHz,  $\text{CDCl}_3$ )  $\delta$  7.65 – 7.55 (m, 8H), 7.40 – 7.35 (m, 6H), 7.25 – 7.07 (m, 10H), 1.29 (s, 18H);  $^{13}\text{C NMR}$  (101 MHz,  $\text{CDCl}_3$ )  $\delta$  156.1 (d,  $J = 84.7$  Hz), 154.8 (d,  $J = 2.5$  Hz), 141.6 (dd,  $J = 92.4, 8.7$  Hz), 140.6 (dd,  $J = 16.4, 10.0$  Hz), 132.4 (d,  $J = 10.0$  Hz), 131.8 (d,  $J = 2.5$  Hz), 131.7 (d,  $J = 68.1$  Hz), 130.8 (d,  $J = 10.1$  Hz), 130.6 (d,  $J = 72.8$  Hz), 128.4 – 128.3 (m), 128.1, 128.0 (d,  $J = 12.6$  Hz), 125.4 (d,  $J = 12.7$  Hz), 35.0, 31.1;  $^{31}\text{P NMR}$  (162 MHz,  $\text{CDCl}_3$ )  $\delta$  25.6 (d,  $J = 14.1$  Hz), 18.1 (d,  $J = 14.2$  Hz). HRMS (ESI) calcd for  $\text{C}_{40}\text{H}_{43}\text{O}_2\text{P}_2^+$   $[\text{M}+\text{H}]^+$  617.2733, found 617.2730.

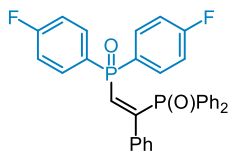

**(5d)** White solid (m.p.: 82 - 83 °C); 82% yield;  $^1\text{H NMR}$  (400 MHz,  $\text{CDCl}_3$ )  $\delta$  7.80 – 7.74 (m, 4H), 7.52 (dd,  $J = 12.1, 7.8$  Hz, 4H), 7.44 (t,  $J = 7.3$  Hz, 2H), 7.31 (t,  $J = 7.5$  Hz, 4H) (overlap one peak of 7.26), 7.23 (t,  $J = 7.5$  Hz, 1H), 7.19 – 7.06 (m, 7H), 6.97 (d,  $J = 7.5$  Hz, 2H);  $^{13}\text{C NMR}$  (101 MHz,  $\text{CDCl}_3$ )  $\delta$  164.8 (dd,  $J = 253.8, 3.3$  Hz), 157.0 (d,  $J = 83.8$  Hz), 141.7 (dd,  $J = 94.7, 7.8$  Hz), 140.0 (dd,  $J = 16.7, 10.7$  Hz), 133.7 (dd,  $J = 11.4, 8.8$  Hz), 132.2 (d,  $J = 9.8$  Hz), 132.0 (d,  $J = 2.7$  Hz), 131.1 (d,  $J = 105.4$  Hz), 129.9 (dd,  $J = 112.4, 3.2$  Hz), 128.6, 128.3 (d,  $J = 3.4$  Hz), 128.2, 128.2 (d,  $J = 8.7$  Hz), 115.6 (dd,  $J = 21.6, 13.8$  Hz);  $^{31}\text{P NMR}$  (162 MHz,  $\text{CDCl}_3$ )  $\delta$  24.6 (d,  $J = 14.1$  Hz), 18.9 (d,  $J = 14.2$  Hz);  $^{19}\text{F NMR}$  (376 MHz,  $\text{CDCl}_3$ )  $\delta$  -107.3. HRMS (ESI) calcd for  $\text{C}_{32}\text{H}_{25}\text{F}_2\text{O}_2\text{P}_2^+$   $[\text{M}+\text{H}]^+$  541.1292, found 541.1292.

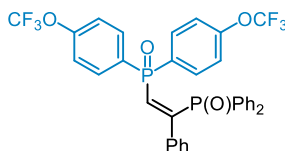

**(5e)** White solid (m.p.: 117 - 119 °C); 73% yield;  $^1\text{H NMR}$  (400 MHz,  $\text{CDCl}_3$ )  $\delta$  7.85 – 7.80 (m, 4H), 7.49 – 7.42 (m, 6H), 7.31 – 7.27 (m, 4H) (overlap one peak of 7.26), 7.23 – 7.05 (m, 8H), 6.94 (d,  $J = 7.5$  Hz, 2H);  $^{13}\text{C NMR}$  (101 MHz,  $\text{CDCl}_3$ )  $\delta$  157.7 (d,  $J = 83.4$  Hz), 151.61 – 151.57 (m), 141.2 (dd,  $J = 95.7, 7.6$  Hz), 139.7 (dd,  $J = 16.7, 10.7$  Hz), 133.3 – 132.1 (m), 130.8 (d,  $J = 105.3$  Hz), 128.7, 128.3 – 128.2 (m), 120.4 (d,  $J = 13.4$  Hz), 120.3 (q,  $J = 259.6$  Hz);  $^{31}\text{P NMR}$  (162 MHz,  $\text{CDCl}_3$ )  $\delta$  24.4 (d,  $J = 14.4$  Hz), 18.4 (d,  $J = 14.2$  Hz);  $^{19}\text{F NMR}$  (376 MHz,  $\text{CDCl}_3$ )  $\delta$  -57.6. HRMS (ESI) calcd for  $\text{C}_{34}\text{H}_{25}\text{F}_6\text{O}_4\text{P}_2^+$   $[\text{M}+\text{H}]^+$  673.1127, found 673.1129.

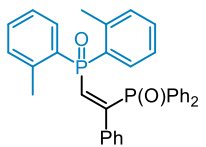

**(5f)** White solid (m.p.: 72 - 73 °C); 98% yield;  $^1\text{H NMR}$  (400 MHz,  $\text{CDCl}_3$ )  $\delta$  7.78 (dd,  $J = 12.4, 7.4$  Hz, 4H), 7.37 – 7.31 (m, 6H), 7.26 – 7.11 (m, 13H), 7.01 (dd,  $J = 36.6, 19.5$  Hz, 1H), 2.42 (s, 6H);  $^{13}\text{C NMR}$  (101 MHz,  $\text{CDCl}_3$ )  $\delta$  157.1 (d,  $J = 84.1$  Hz), 141.8 (d,  $J = 8.4$  Hz), 141.3 (dd,  $J = 69.4, 8.9$  Hz), 140.8 (dd,  $J = 9.5, 5.6$  Hz), 132.7 (d,  $J = 10.3$  Hz), 132.5 (d,  $J = 12.3$  Hz), 132.0 – 131.8 (m), 131.7 (d,  $J = 11.0$  Hz), 130.8 (d,  $J = 26.6$  Hz), 128.3, 128.23 – 128.20 (m), 127.8 (d,  $J = 12.7$  Hz), 125.5 (d,  $J = 12.9$  Hz), 21.9 (d,  $J = 4.1$  Hz);  $^{31}\text{P NMR}$  (162 MHz,  $\text{CDCl}_3$ )  $\delta$  26.0 (d,  $J = 14.2$  Hz), 23.7 (d,  $J = 14.1$  Hz). HRMS (ESI) calcd for  $\text{C}_{34}\text{H}_{31}\text{O}_2\text{P}_2^+$   $[\text{M}+\text{H}]^+$  533.1794, found 533.1795.

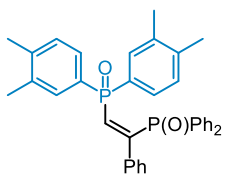

**(5g)** White solid (m.p.: 75 - 77 °C); 92% yield;  $^1\text{H NMR}$  (400 MHz,  $\text{CDCl}_3$ )  $\delta$  7.60 (dd,  $J = 12.2, 7.4$  Hz, 4H), 7.41 – 7.34 (m, 6H), 7.26 – 7.02 (m, 12H) (overlap one peak of 7.26), 2.25 (s, 6H), 2.20 (s, 6H);  $^{13}\text{C NMR}$  (101 MHz,  $\text{CDCl}_3$ )  $\delta$  156.0 (d,  $J = 84.8$  Hz), 141.9 (dd,  $J = 91.9, 8.6$  Hz), 140.7 (d,  $J = 2.8$  Hz) (overlap one peak of 140.6), 140.6 (dd,  $J = 16.5, 10.3$  Hz), 136.9 (d,  $J = 12.5$  Hz), 132.3 (d,  $J = 10.1$  Hz), 131.808 (d,  $J = 31.1$  Hz), 131.804 (d,  $J = 9.8$  Hz), 131.7 (d,  $J = 2.7$  Hz), 130.7 (d,  $J = 35.3$  Hz), 129.7 (d,  $J = 13.2$  Hz), 128.5, 128.39 – 128.36 (m), 128.1, 128.0 (d,  $J = 12.6$  Hz), 19.9, 19.8;  $^{31}\text{P NMR}$  (162 MHz,  $\text{CDCl}_3$ )  $\delta$  25.6 (d,  $J = 14.1$  Hz), 18.8 (d,  $J = 13.9$  Hz). HRMS (ESI) calcd for  $\text{C}_{36}\text{H}_{35}\text{O}_2\text{P}_2^+$   $[\text{M}+\text{H}]^+$  561.2107, found 561.2106.

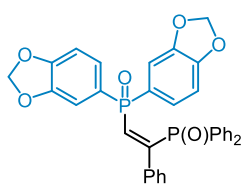

**(5h)** White solid (m.p.: 91 - 92 °C); 93% yield;  $^1\text{H NMR}$  (400 MHz,  $\text{CDCl}_3$ )  $\delta$  7.64 – 7.59 (m, 4H), 7.41 – 7.37 (m, 2H), 7.30 – 7.25 (m, 4H) (overlap one peak of 7.26), 7.22 – 6.98 (m, 10H), 6.79 (d,  $J = 2.5$  Hz, 1H), 6.77 (d,  $J = 2.5$  Hz, 1H), 5.95 – 5.94 (m, 4H);  $^{13}\text{C NMR}$  (101 MHz,  $\text{CDCl}_3$ )  $\delta$  156.3 (d,  $J = 84.2$  Hz), 150.5 (d,  $J = 2.8$  Hz), 147.7 (d,  $J = 18.7$  Hz), 141.5 (dd,  $J = 94.3, 8.4$  Hz), 140.6 (dd,  $J = 16.6, 10.1$  Hz), 132.3 (d,  $J = 10.0$  Hz), 131.8 (d,  $J = 2.6$  Hz), 131.6 (d,  $J = 105.7$  Hz), 128.4, 128.3 (d,  $J = 3.4$  Hz), 128.1, 128.0 (d,  $J = 12.6$  Hz), 127.1 (d,  $J = 113.5$  Hz), 126.4 (d,  $J = 11.0$  Hz), 110.7 (d,  $J = 12.7$  Hz), 108.5 (d,  $J = 15.6$  Hz), 101.5;  $^{31}\text{P}$

**NMR** (162 MHz, CDCl<sub>3</sub>) δ 25.3 (d, *J* = 14.3 Hz), 19.2 (d, *J* = 14.2 Hz). HRMS (ESI) calcd for C<sub>34</sub>H<sub>27</sub>O<sub>6</sub>P<sub>2</sub><sup>+</sup> [M+H]<sup>+</sup> 593.1277, found 593.1270.

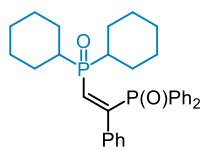

**(5i)** White solid (m.p.: 118 - 120 °C); 93% yield; **<sup>1</sup>H NMR** (400 MHz, CDCl<sub>3</sub>) δ 7.52 – 7.43 (m, 6H), 7.35 – 7.30 (m, 4H), 7.14 (t, *J* = 7.2 Hz, 1H), 7.05 (t, *J* = 7.8 Hz, 2H), 6.73 (d, *J* = 7.4 Hz, 2H), 6.60 (dd, *J* = 37.4, 9.6 Hz, 1H), 2.48 – 2.40 (m, 2H), 1.93 – 1.91 (m, 2H), 1.83 – 1.80 (m, 2H), 1.75 – 1.72 (m, 4H), 1.63 – 1.59 (m, 2H), 1.51 – 1.40 (m, 4H), 1.21 – 1.13 (m, 6H); **<sup>13</sup>C NMR** (101 MHz, CDCl<sub>3</sub>) δ 153.9 (d, *J* = 85.3 Hz), 145.5 (d, *J* = 68.8 Hz), 140.2 – 139.9 (m), 132.3 (d, *J* = 2.3 Hz), 132.0 (d, *J* = 9.8 Hz), 131.2 (d, *J* = 105.2 Hz), 128.5 – 128.4 (m), 128.1, 38.3 (d, *J* = 67.9 Hz), 26.7 (d, *J* = 3.3 Hz), 26.4 (d, *J* = 27.9 Hz), 26.4, 26.1 (d, *J* = 2.7 Hz), 25.8; **<sup>31</sup>P NMR** (162 MHz, CDCl<sub>3</sub>) δ 48.7, 25.0 (d, *J* = 11.2 Hz). HRMS (ESI) calcd for C<sub>32</sub>H<sub>39</sub>O<sub>2</sub>P<sub>2</sub><sup>+</sup> [M+H]<sup>+</sup> 517.2420, found 517.2420.

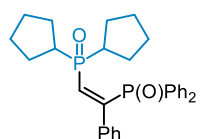

**(5j)** White solid (m.p.: 171 - 173 °C); 74% yield; **<sup>1</sup>H NMR** (400 MHz, CDCl<sub>3</sub>) δ 7.53 – 7.48 (m, 6H), 7.38 – 7.34 (m, 4H), 7.15 (t, *J* = 7.0 Hz, 1H), 7.04 (t, *J* = 7.7 Hz, 2H), 6.92 – 6.80 (m, 1H), 6.70 (d, *J* = 7.4 Hz, 2H), 3.16 – 3.08 (m, 2H), 1.94 – 1.46 (m, 16H); **<sup>13</sup>C NMR** (101 MHz, CDCl<sub>3</sub>) δ 151.1 (d, *J* = 87.4 Hz), 149.3 (d, *J* = 73.8 Hz), 140.0 – 139.7 (m), 132.4 (d, *J* = 2.6 Hz), 132.0 (d, *J* = 9.6 Hz), 131.0 (d, *J* = 104.6 Hz), 128.9 (d, *J* = 3.0 Hz), 128.5 (d, *J* = 12.3 Hz), 128.3, 128.1, 38.9 (d, *J* = 70.9 Hz), 27.8 (d, *J* = 1.3 Hz), 26.7 (d, *J* = 10.4 Hz), 26.6, 26.1 (d, *J* = 10.5 Hz); **<sup>31</sup>P NMR** (162 MHz, CDCl<sub>3</sub>) δ 49.1 (d, *J* = 12.0 Hz), 24.7 (d, *J* = 12.4 Hz). HRMS (ESI) calcd for C<sub>30</sub>H<sub>35</sub>O<sub>2</sub>P<sub>2</sub><sup>+</sup> [M+H]<sup>+</sup> 489.2107, found 489.2105.

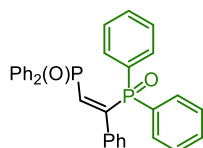

**(6a)** White solid (m.p.: 87 - 89 °C); 89% yield; **<sup>1</sup>H NMR** (400 MHz, CDCl<sub>3</sub>) δ 7.72 – 7.61 (m, 8H), 7.48 – 7.37 (m, 8H), 7.30 – 7.26 (m, 4H) (overlap one peak of 7.26), 7.25 – 7.06 (m, 6H); **<sup>13</sup>C NMR** (101 MHz, CDCl<sub>3</sub>) δ 157.1 (d, *J* = 84.2 Hz), 141.1 (dd, *J* = 92.9, 8.1 Hz), 140.4 (dd, *J* = 16.6, 10.4 Hz), 134.3 (d, *J* = 108.5 Hz), 132.4 (d, *J* = 10.1 Hz), 131.9 (d, *J* = 2.4 Hz), 131.5 (d, *J* = 2.1 Hz), 131.3 (d, *J* = 105.6 Hz), 130.9 (d, *J* = 9.7 Hz), 128.5 – 128.3 (m), 128.2, 128.1 (d, *J* = 12.6 Hz); **<sup>31</sup>P NMR** (162 MHz, CDCl<sub>3</sub>) δ 25.1 (d, *J* = 14.0 Hz), 18.4 (d, *J* = 14.0 Hz). HRMS (ESI) calcd for C<sub>32</sub>H<sub>27</sub>O<sub>2</sub>P<sub>2</sub><sup>+</sup> [M+H]<sup>+</sup> 505.1481, found 505.1480.

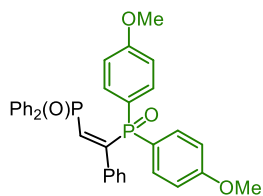

**(6b)** White solid (m.p.: 85 - 87 °C); 92% yield; **<sup>1</sup>H NMR** (400 MHz, CDCl<sub>3</sub>) δ 7.68 – 7.63 (m, 4H), 7.59 – 7.54 (m, 4H), 7.45 – 7.41 (m, 2H), 7.38 – 7.34 (m, 4H), 7.25 – 6.99 (m, 6H), 6.75 (dd, *J* = 8.8, 2.2 Hz, 4H), 3.76 (s, 6H); **<sup>13</sup>C NMR** (101 MHz, CDCl<sub>3</sub>) δ 162.4 (d, *J* = 2.8 Hz), 158.4 (d, *J* = 84.7 Hz), 140.8 (dd, *J* = 16.8, 9.9 Hz), 139.7 (dd, *J* = 94.1, 8.5 Hz), 134.8 (d, *J* = 108.3 Hz), 134.6 (d, *J* = 11.5 Hz), 131.3 (d, *J* = 2.4 Hz), 130.7 (d, *J* = 9.6 Hz), 128.4 – 128.3 (m), 128.1, 122.3 (d, *J* = 112.3 Hz), 113.6 (d, *J* = 13.6 Hz), 55.2; **<sup>31</sup>P NMR** (162 MHz, CDCl<sub>3</sub>) δ 25.0 (d, *J* = 13.8 Hz), 18.0 (d, *J* = 13.7 Hz). HRMS (ESI) calcd for C<sub>34</sub>H<sub>31</sub>O<sub>4</sub>P<sub>2</sub><sup>+</sup> [M+H]<sup>+</sup> 565.1692, found 565.1690.

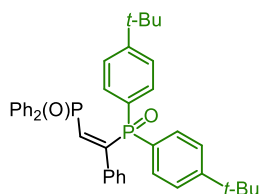

**(6c)** Colorless oil; 97% yield; **<sup>1</sup>H NMR** (400 MHz, CDCl<sub>3</sub>) δ 7.69 – 7.64 (m, 4H), 7.53 (dd, *J* = 12.0, 8.3 Hz, 4H), 7.45 – 7.41 (m, 2H), 7.38 – 7.33 (m, 4H), 7.28 – 7.25 (m, 4H) (overlap one peak of 7.26), 7.23 – 7.03 (m, 6H), 1.26 (s, 18H); **<sup>13</sup>C NMR** (101 MHz, CDCl<sub>3</sub>) δ 157.6 (d, *J* = 83.7 Hz), 155.1 (d, *J* = 2.7 Hz), 140.7 (dd, *J* = 16.6, 9.8 Hz) (overlap one peak of 140.4), 140.4 (dd, *J* = 93.7, 8.1 Hz), 134.4 (d, *J* = 108.4 Hz), 132.3 (d, *J* = 10.5 Hz), 131.4 (d, *J* = 2.4 Hz), 130.9 (d, *J* = 9.8 Hz), 128.4 - 128.3 (m), 128.1 (d, *J* = 108.1 Hz), 128.0, 125.0 (d, *J* = 12.8 Hz), 34.9, 31.1; **<sup>31</sup>P NMR** (162 MHz, CDCl<sub>3</sub>) δ 25.4 (d, *J* = 14.5 Hz), 18.6 (d, *J* = 13.3 Hz). HRMS (ESI) calcd for C<sub>40</sub>H<sub>43</sub>O<sub>2</sub>P<sub>2</sub><sup>+</sup> [M+H]<sup>+</sup> 617.2733, found 617.2730.

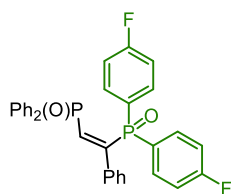

**(6d)** White solid (m.p.: 72 - 74 °C); 85% yield;  $^1\text{H NMR}$  (400 MHz,  $\text{CDCl}_3$ )  $\delta$  7.77 – 7.70 (m, 4H), 7.61 – 7.56 (m, 4H), 7.47 – 7.43 (m, 2H), 7.40 – 7.36 (m, 4H), 7.28 – 7.05 (m, 6H) (overlap one peak of 7.26), 6.94 (td,  $J = 8.8, 2.2$  Hz, 4H);  $^{13}\text{C NMR}$  (101 MHz,  $\text{CDCl}_3$ )  $\delta$  165.1 (dd,  $J = 254.6, 3.3$  Hz), 157.2 (d,  $J = 85.7$  Hz), 140.4 (dd,  $J = 16.5, 9.5$  Hz), 140.2 (dd,  $J = 92.5, 9.3$  Hz), 135.2 (dd,  $J = 11.7, 9.0$  Hz), 134.0 (d,  $J = 107.9$  Hz), 131.7 (d,  $J = 2.4$  Hz), 130.6 (d,  $J = 9.7$  Hz), 128.7, 128.6 (d,  $J = 12.4$  Hz), 128.3, 127.1 (dd,  $J = 109.4, 3.0$  Hz), 115.4 (dd,  $J = 21.5, 14.0$  Hz);  $^{31}\text{P NMR}$  (162 MHz,  $\text{CDCl}_3$ )  $\delta$  24.5 (d,  $J = 14.7$  Hz), 17.4 (d,  $J = 14.2$  Hz);  $^{19}\text{F NMR}$  (376 MHz,  $\text{CDCl}_3$ )  $\delta$  -106.5 (d,  $J = 9.1$  Hz). HRMS (ESI) calcd for  $\text{C}_{32}\text{H}_{25}\text{F}_2\text{O}_2\text{P}_2^+$   $[\text{M}+\text{H}]^+$  541.1292, found 541.1296.

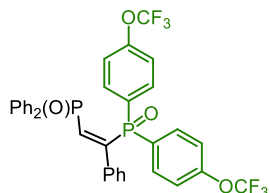

**(6e)** White solid (m.p.: 120 - 122 °C); 58% yield;  $^1\text{H NMR}$  (400 MHz,  $\text{CDCl}_3$ )  $\delta$  7.80 (dd,  $J = 11.8, 8.6$  Hz, 4H), 7.57 (dd,  $J = 12.1, 7.2$  Hz, 4H), 7.48 (t,  $J = 7.5$  Hz, 2H), 7.40 (td,  $J = 7.6, 3.0$  Hz, 4H), 7.30 – 7.14 (m, 6H) (overlap one peak of 7.26), 7.10 (d,  $J = 7.0$  Hz, 4H);  $^{13}\text{C NMR}$  (101 MHz,  $\text{CDCl}_3$ )  $\delta$  156.5 (d,  $J = 86.0$  Hz), 152.0 (q,  $J = 1.5$  Hz), 140.3 (dd,  $J = 91.8, 9.5$  Hz), 140.2 (dd,  $J = 16.4, 9.3$  Hz), 134.6 (d,  $J = 11.5$  Hz), 133.6 (d,  $J = 107.7$  Hz), 131.8 (d,  $J = 2.7$  Hz), 130.6 (d,  $J = 9.8$  Hz), 129.8 (d,  $J = 108.0$  Hz), 128.8, 128.6 (d,  $J = 12.4$  Hz), 128.4, 128.3 (d,  $J = 3.5$  Hz), 120.3 (q,  $J = 259.7$  Hz), 119.9 (d,  $J = 13.5$  Hz);  $^{31}\text{P NMR}$  (162 MHz,  $\text{CDCl}_3$ )  $\delta$  24.2 (d,  $J = 14.8$  Hz), 17.3 (d,  $J = 14.6$  Hz);  $^{19}\text{F NMR}$  (376 MHz,  $\text{CDCl}_3$ )  $\delta$  -57.5. HRMS (ESI) calcd for  $\text{C}_{34}\text{H}_{25}\text{F}_6\text{O}_4\text{P}_2^+$   $[\text{M}+\text{H}]^+$  673.1127, found 673.1128.

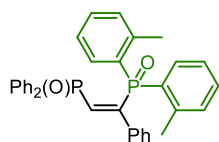

**(6f)** White solid (m.p.: 85 - 86 °C); 98% yield;  $^1\text{H NMR}$  (400 MHz,  $\text{CDCl}_3$ )  $\delta$  7.71 (dd,  $J = 12.1, 7.6$  Hz, 4H), 7.44 – 7.25 (m, 11H) (overlap one peak of 7.26), 7.19 – 7.10 (m, 7H), 6.97 (dd,  $J = 7.2, 4.2$  Hz, 2H), 2.36 (s, 6H);  $^{13}\text{C NMR}$  (101 MHz,  $\text{CDCl}_3$ )  $\delta$  155.7 (d,  $J = 82.8$  Hz), 143.2 (d,  $J = 7.7$  Hz), 142.2 (dd,  $J = 94.0, 7.8$  Hz), 140.4 (dd,  $J = 16.6, 9.8$  Hz), 133.8 (d,  $J = 13.8$  Hz), 132.9 (d,  $J = 108.0$  Hz), 132.0 (d,  $J = 2.6$  Hz), 131.5 – 131.4 (m), 129.7 (d,  $J = 104.3$  Hz), 128.5, 128.4 (d,  $J = 3.6$  Hz), 128.1 - 127.9 (m), 125.0 (d,  $J = 13.6$  Hz), 21.8 (d,  $J = 4.3$  Hz);  $^{31}\text{P NMR}$  (162 MHz,  $\text{CDCl}_3$ )  $\delta$  33.9 (d,  $J = 14.4$  Hz), 21.2 (d,  $J = 14.6$  Hz). HRMS (ESI) calcd for  $\text{C}_{34}\text{H}_{31}\text{O}_2\text{P}_2^+$   $[\text{M}+\text{H}]^+$  533.1794, found 533.1793.

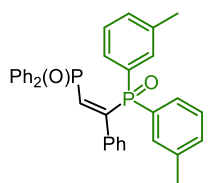

**(6g)** Colorless oil; 90% yield;  $^1\text{H NMR}$  (400 MHz,  $\text{CDCl}_3$ )  $\delta$  7.71 – 7.66 (m, 4H), 7.46 – 7.35 (m, 10H), 7.25 – 7.04 (m, 10H), 2.21 (s, 6H);  $^{13}\text{C NMR}$  (101 MHz,  $\text{CDCl}_3$ )  $\delta$  157.1 (d,  $J = 83.5$  Hz), 140.8 (dd,  $J = 101.7, 8.4$  Hz), 140.6 (dd,  $J = 16.7, 10.0$  Hz), 137.8 (d,  $J = 12.4$  Hz), 134.3 (d,  $J = 108.3$  Hz), 132.8 (d,  $J = 9.7$  Hz), 132.6 (d,  $J = 2.8$  Hz), 131.4 (d,  $J = 2.7$  Hz), 131.3 (d,  $J = 105.1$  Hz), 131.0 (d,  $J = 9.9$  Hz), 129.6 (d,  $J = 10.4$  Hz), 128.5 - 128.3 (m), 128.1, 127.9 (d,  $J = 13.4$  Hz), 21.4;  $^{31}\text{P NMR}$  (162 MHz,  $\text{CDCl}_3$ )  $\delta$  25.3 (d,  $J = 13.8$  Hz), 18.5 (d,  $J = 13.8$  Hz). HRMS (ESI) calcd for  $\text{C}_{34}\text{H}_{31}\text{O}_2\text{P}_2^+$   $[\text{M}+\text{H}]^+$  533.1794, found 533.1792.

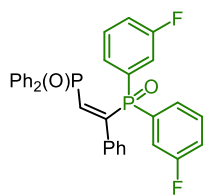

**(6h)** White solid (m.p.: 65 - 66 °C); 83% yield;  $^1\text{H NMR}$  (400 MHz,  $\text{CDCl}_3$ )  $\delta$  7.66 – 7.61 (m, 4H), 7.49 – 7.45 (m, 4H), 7.42 – 7.34 (m, 6H), 7.30 – 7.05 (m, 10H) (overlap one peak of 7.26);  $^{13}\text{C NMR}$  (101 MHz,  $\text{CDCl}_3$ )  $\delta$  162.1 (dd,  $J = 250.8, 17.9$  Hz), 155.7 (d,  $J = 86.3$  Hz), 141.4 (dd,  $J = 91.6, 9.0$  Hz), 140.1 (dd,  $J = 16.4, 9.9$  Hz), 134.0 (dd,  $J = 105.7, 5.8$  Hz), 133.6 (d,  $J = 108.2$  Hz), 131.8 (d,  $J = 2.6$  Hz), 130.8 (d,  $J = 9.7$  Hz), 130.0 (dd,  $J = 14.7, 7.3$  Hz), 128.8, 128.6 (d,  $J = 12.4$  Hz), 128.33, 128.25 (d,  $J = 3.5$  Hz), 128.1 (dd,  $J = 9.6, 3.1$  Hz), 119.3 – 119.0 (m);  $^{31}\text{P NMR}$  (162 MHz,  $\text{CDCl}_3$ )  $\delta$  23.3 (dt,  $J = 13.4, 6.7$  Hz), 17.9 (d,  $J = 14.9$  Hz);  $^{19}\text{F NMR}$  (376 MHz,  $\text{CDCl}_3$ )  $\delta$  -111.2 (d,  $J = 5.6$  Hz). HRMS (ESI) calcd for  $\text{C}_{32}\text{H}_{25}\text{F}_2\text{O}_2\text{P}_2^+$   $[\text{M}+\text{H}]^+$  541.1292, found 541.1292.

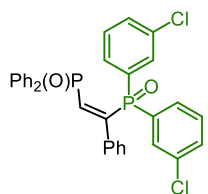

**(6i)** White solid (m.p.: 65 - 66 °C); 70% yield;  $^1\text{H NMR}$  (400 MHz,  $\text{CDCl}_3$ )  $\delta$  7.71 – 7.58 (m, 8H), 7.50 (td,  $J = 7.3, 1.1$  Hz, 2H), 7.45 – 7.37 (m, 6H), 7.31 – 7.12 (m, 8H) (overlap one peak of 7.26);  $^{13}\text{C NMR}$  (101 MHz,  $\text{CDCl}_3$ )  $\delta$  155.4 (d,  $J = 86.1$  Hz), 141.3 (dd,  $J = 91.3, 9.3$  Hz), 140.1 (dd,  $J = 16.6, 9.7$  Hz), 134.6 (d,  $J = 16.5$  Hz), 133.9 (d,  $J = 104.6$  Hz), 133.3 (d,  $J = 107.9$  Hz), 132.12, 132.08 (d,  $J = 14.0$  Hz), 131.9 (d,  $J = 2.7$  Hz), 130.8 (d,  $J = 9.7$  Hz), 130.5 (d,  $J = 9.9$  Hz), 129.5 (d,  $J = 13.8$  Hz), 128.8, 128.6 (d,  $J = 12.4$  Hz), 128.4, 128.3



(d,  $J = 3.8$  Hz);  $^{31}\text{P}$  NMR (162 MHz,  $\text{CDCl}_3$ )  $\delta$  23.6 (d,  $J = 14.8$  Hz), 17.9 (d,  $J = 14.9$  Hz). HRMS (ESI) calcd for  $\text{C}_{32}\text{H}_{25}\text{Cl}_2\text{O}_2\text{P}_2^+$   $[\text{M}+\text{H}]^+$  573.0701, found 573.0700.

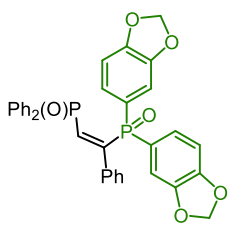

**(6j)** White solid (m.p.: 97 - 99 °C); 95% yield;  $^1\text{H}$  NMR (400 MHz,  $\text{CDCl}_3$ )  $\delta$  7.65 (dd,  $J = 12.1, 7.3$  Hz, 4H), 7.46 - 7.37 (m, 6H), 7.27 - 7.00 (m, 10H) (overlap one peak of 7.26), 6.69 (dd,  $J = 8.1, 2.4$  Hz, 2H), 5.92 (d,  $J = 1.7$  Hz, 4H);  $^{13}\text{C}$  NMR (101 MHz,  $\text{CDCl}_3$ )  $\delta$  157.8 (d,  $J = 85.8$  Hz), 150.9 (d,  $J = 2.9$  Hz), 147.5 (d,  $J = 19.1$  Hz), 140.5 (dd,  $J = 16.5, 9.9$  Hz), 140.2 (dd,  $J = 93.3, 8.6$  Hz), 134.3 (d,  $J = 108.4$  Hz), 131.5 (d,  $J = 2.5$  Hz), 130.7 (d,  $J = 9.8$  Hz), 128.6, 128.5 - 128.2 (m), 124.0 (d,  $J = 111.1$  Hz), 112.0 (d,  $J = 13.0$  Hz), 108.3 (d,  $J = 15.9$  Hz), 101.5;  $^{31}\text{P}$  NMR (162 MHz,  $\text{CDCl}_3$ )  $\delta$  25.8 (d,  $J = 14.2$  Hz), 18.2 (d,  $J = 14.3$

Hz). HRMS (ESI) calcd for  $\text{C}_{34}\text{H}_{27}\text{O}_6\text{P}_2^+$   $[\text{M}+\text{H}]^+$  593.1277, found 593.1278.

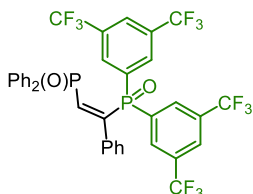

**(6k)** White solid (m.p.: 70 - 71 °C); 60% yield;  $^1\text{H}$  NMR (400 MHz,  $\text{CDCl}_3$ )  $\delta$  8.29 (d,  $J = 12.2$  Hz, 4H), 7.91 (s, 2H), 7.53 - 7.46 (m, 6H), 7.43 - 7.24 (m, 10H) (overlap one peak of 7.26);  $^{13}\text{C}$  NMR (101 MHz,  $\text{CDCl}_3$ )  $\delta$  153.6 (d,  $J = 88.9$  Hz), 142.4 (dd,  $J = 88.7, 9.9$  Hz), 139.1 (dd,  $J = 16.0, 9.5$  Hz), 135.3 (d,  $J = 107.4$  Hz), 132.5, - 132.4 (m), 131.8 (d,  $J = 107.6$  Hz), 131.7 (q,  $J = 34.2$  Hz), 131.5 (q,  $J = 34.2$  Hz), 130.5 (d,  $J = 10.0$  Hz), 129.5, 128.9 (d,  $J = 12.5$  Hz), 128.8, 128.3 (d,  $J = 3.8$  Hz), 125.9 (q,  $J = 3.1$  Hz), 122.7 (q,  $J = 274.2$  Hz);  $^{31}\text{P}$  NMR (162 MHz,  $\text{CDCl}_3$ )  $\delta$  23.8 (d,  $J = 15.9$  Hz), 18.6 (d,  $J = 15.1$  Hz);  $^{19}\text{F}$  NMR (376 MHz,  $\text{CDCl}_3$ )  $\delta$  -62.9. HRMS (ESI) calcd for  $\text{C}_{36}\text{H}_{23}\text{F}_{12}\text{O}_2\text{P}_2^+$   $[\text{M}+\text{H}]^+$  777.0976, found 777.0977.

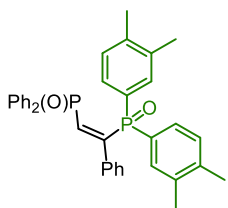

**(6l)** Colorless oil; 86% yield;  $^1\text{H}$  NMR (400 MHz,  $\text{CDCl}_3$ )  $\delta$  7.69 - 7.64 (m, 4H), 7.45 - 7.30 (m, 10H), 7.24 - 7.01 (m, 8H), 2.21 (s, 6H), 2.11 (s, 6H);  $^{13}\text{C}$  NMR (101 MHz,  $\text{CDCl}_3$ )  $\delta$  157.8 (d,  $J = 83.3$  Hz), 140.9 - 140.7 (m) (overlap one peak of 140.2), 140.2 (dd,  $J = 94.2, 8.3$  Hz), 136.4 (d,  $J = 12.9$  Hz), 134.6 (d,  $J = 108.4$  Hz), 133.4 (d,  $J = 10.1$  Hz), 131.2 (d,  $J = 2.7$  Hz), 130.9 (d,  $J = 9.8$  Hz), 130.3 (d,  $J = 10.5$  Hz), 129.2 (d,  $J = 13.5$  Hz), 128.5 (d,  $J = 3.2$  Hz), 128.36 (d,  $J = 107.3$  Hz), 128.35 128.2 (d,  $J = 12.4$  Hz), 128.0, 19.9, 19.7;  $^{31}\text{P}$  NMR (162 MHz,  $\text{CDCl}_3$ )  $\delta$  25.6 (d,  $J = 13.4$  Hz), 18.5 (d,  $J = 13.9$  Hz). HRMS (ESI) calcd for  $\text{C}_{36}\text{H}_{35}\text{O}_2\text{P}_2^+$   $[\text{M}+\text{H}]^+$  561.2107, found 561.2108.

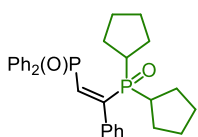

**(6m)** White solid (m.p.: 200 - 202 °C); 91% yield;  $^1\text{H}$  NMR (400 MHz,  $\text{CDCl}_3$ )  $\delta$  7.72 (dd,  $J = 11.9, 7.3$  Hz, 4H), 7.57 - 7.47 (m, 6H), 7.37 - 7.31 (m, 5H), 6.79 (dd,  $J = 31.9, 22.0$  Hz, 1H), 3.34 - 3.25 (m, 2H), 1.97 - 1.91 (m, 4H), 1.79 - 1.56 (m, 10H), 1.41 - 1.32 (m, 2H);  $^{13}\text{C}$  NMR (101 MHz,  $\text{CDCl}_3$ )  $\delta$  160.6 (dd,  $J = 65.2, 1.8$  Hz), 141.8 (dd,  $J = 18.0, 5.7$  Hz), 133.5 (dd,  $J = 95.3, 10.1$  Hz), 133.2 (d,  $J = 107.2$  Hz), 132.2 (d,  $J = 2.7$  Hz), 130.9 (d,  $J = 9.6$  Hz), 128.9 (d,  $J = 12.2$  Hz), 128.7 (d,  $J = 2.5$  Hz), 128.5, 127.9, 39.5 (d,  $J = 68.7$  Hz), 27.7 (d,  $J = 2.0$  Hz), 26.7 (d,  $J = 10.5$  Hz), 26.3, 25.8 (d,  $J = 11.4$  Hz);  $^{31}\text{P}$  NMR (162 MHz,  $\text{CDCl}_3$ )  $\delta$  46.9 (d,  $J = 13.0$  Hz), 18.6 (d,  $J = 12.1$  Hz). HRMS (ESI) calcd for  $\text{C}_{30}\text{H}_{35}\text{O}_2\text{P}_2^+$   $[\text{M}+\text{H}]^+$  489.2107, found 489.2105.

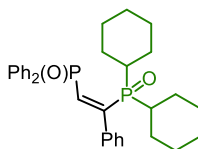

**(6n)** White solid (m.p.: 250 - 251 °C); 91% yield;  $^1\text{H}$  NMR (400 MHz,  $\text{CDCl}_3$ )  $\delta$  7.72 (dd,  $J = 11.9, 7.1$  Hz, 4H), 7.55 - 7.46 (m, 6H), 7.34 - 7.29 (m, 5H), 6.84 (dd,  $J = 31.2, 22.4$  Hz, 1H), 2.97 - 2.89 (m, 2H), 2.08 - 2.05 (m, 2H), 1.76 - 1.74 (m, 4H), 1.65 - 1.43 (m, 8H), 1.33 - 1.23 (m, 2H), 1.19 - 1.09 (m, 2H), 0.98 - 0.89 (m, 2H);  $^{13}\text{C}$  NMR (101 MHz,  $\text{CDCl}_3$ )  $\delta$  158.6 (dd,  $J = 61.5, 1.8$  Hz), 141.8 (dd,  $J = 18.0, 5.5$  Hz), 134.0 (dd,  $J = 95.5, 9.1$  Hz), 133.2 (d,  $J = 106.8$  Hz), 132.2 (d,  $J = 2.7$  Hz), 130.9 (d,  $J = 9.6$  Hz), 129.0 (d,  $J = 12.3$  Hz), 128.8 (d,  $J = 2.6$  Hz), 128.5, 127.9, 39.2 (d,  $J = 64.3$  Hz), 26.6 (d,  $J = 3.8$  Hz), 26.4 - 26.3 (m), 26.2 (d,  $J = 3.7$  Hz), 25.7;  $^{31}\text{P}$  NMR (162 MHz,  $\text{CDCl}_3$ )  $\delta$  50.7 (d,  $J = 11.8$  Hz), 18.3 (d,  $J = 11.9$  Hz). HRMS (ESI) calcd for  $\text{C}_{32}\text{H}_{39}\text{O}_2\text{P}_2^+$   $[\text{M}+\text{H}]^+$  517.2420, found 517.2416.

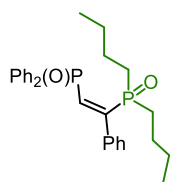

**(6o)** White solid (m.p.: 158 - 159 °C); 99% yield;  $^1\text{H NMR}$  (400 MHz,  $\text{CDCl}_3$ )  $\delta$  7.74 – 7.68 (m, 4H), 7.55 – 7.44 (m, 6H), 7.36 – 7.28 (m, 5H), 6.82 (dd,  $J = 32.7, 21.6$  Hz, 1H), 2.65 – 2.55 (m, 2H), 2.31 – 2.20 (m, 2H), 1.74 – 1.61 (m, 2H), 1.47 – 1.36 (m, 2H), 1.32 – 1.11 (m, 4H) (overlap one peak of 1.26), 0.77 (t,  $J = 7.3$  Hz, 6H);  $^{13}\text{C NMR}$  (101 MHz,  $\text{CDCl}_3$ )  $\delta$  159.0 (dd,  $J = 67.1, 1.3$  Hz), 141.4 (dd,  $J = 17.7, 6.3$  Hz), 134.6 (dd,  $J = 94.1, 9.9$  Hz), 133.1 (d,  $J = 107.2$  Hz), 132.2 (d,  $J = 2.7$  Hz), 130.9 (d,  $J = 9.6$  Hz), 128.9 (d,  $J = 12.2$  Hz), 128.6, 128.5 (d,  $J = 2.6$  Hz), 128.0, 31.0 (d,  $J = 66.9$  Hz), 24.1 (d,  $J = 16.1$  Hz), 23.9 (d,  $J = 4.7$  Hz), 13.6;  $^{31}\text{P NMR}$  (162 MHz,  $\text{CDCl}_3$ )  $\delta$  44.2 (d,  $J = 12.3$  Hz), 18.4 (d,  $J = 13.7$  Hz). HRMS (ESI) calcd for  $\text{C}_{28}\text{H}_{35}\text{O}_2\text{P}_2^+$   $[\text{M}+\text{H}]^+$  461.2107, found 461.2108.

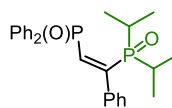

**(6p)** White solid (m.p.: 150 - 151 °C); 89% yield;  $^1\text{H NMR}$  (400 MHz,  $\text{CDCl}_3$ )  $\delta$  7.73 – 7.68 (m, 4H), 7.55 – 7.45 (m, 6H), 7.38 – 7.28 (m, 5H), 6.85 (dd,  $J = 31.5, 21.9$  Hz, 1H), 3.21 – 3.12 (m, 2H), 1.29 (dd,  $J = 15.6, 7.0$  Hz, 6H), 1.10 (dd,  $J = 16.8, 7.3$  Hz, 6H);  $^{13}\text{C NMR}$  (101 MHz,  $\text{CDCl}_3$ )  $\delta$  158.9 (d,  $J = 63.2$  Hz), 141.7 (dd,  $J = 18.0, 5.7$  Hz), 134.2 (dd,  $J = 94.9, 9.2$  Hz), 132.9 (d,  $J = 107.2$  Hz), 132.2 (d,  $J = 2.7$  Hz), 130.9 (d,  $J = 9.7$  Hz), 129.0 (d,  $J = 12.2$  Hz), 128.8 (d,  $J = 2.6$  Hz), 128.6, 128.0, 29.2 (d,  $J = 64.1$  Hz), 17.5 (d,  $J = 3.9$  Hz), 16.5 (d,  $J = 3.6$  Hz);  $^{31}\text{P NMR}$  (162 MHz,  $\text{CDCl}_3$ )  $\delta$  54.9, 19.0 (d,  $J = 11.5$  Hz). HRMS (ESI) calcd for  $\text{C}_{26}\text{H}_{31}\text{O}_2\text{P}_2^+$   $[\text{M}+\text{H}]^+$  437.1794, found 437.1796.

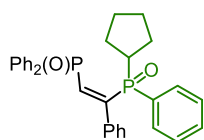

**(6q)** Colorless oil; 88% yield;  $^1\text{H NMR}$  (400 MHz,  $\text{CDCl}_3$ )  $\delta$  7.80 – 7.75 (m, 2H), 7.71 – 7.66 (m, 2H), 7.55 – 7.26 (m, 14H) (overlap one peak of 7.26), 7.16 – 7.14 (m, 2H), 6.86 (dd,  $J = 33.9, 20.1$  Hz, 1H), 3.45 – 3.37 (m, 1H), 2.05 – 1.91 (m, 1H), 1.89 – 1.77 (m, 3H), 1.66 – 1.60 (m, 2H), 1.58 – 1.51 (m, 2H);  $^{13}\text{C NMR}$  (101 MHz,  $\text{CDCl}_3$ )  $\delta$  158.9 (d,  $J = 74.6$  Hz), 140.8 (dd,  $J = 17.3, 8.8$  Hz), 138.4 (dd,  $J = 94.0, 8.6$  Hz), 134.5 (d,  $J = 107.9$  Hz), 134.2 (d,  $J = 108.7$  Hz), 132.7 (d,  $J = 96.5$  Hz), 132.1 (d,  $J = 9.5$  Hz), 131.6 (d,  $J = 2.5$  Hz), 131.5 (d,  $J = 2.3$  Hz), 131.4 (d,  $J = 2.4$  Hz), 131.0 (d,  $J = 9.7$  Hz), 130.7 (d,  $J = 9.8$  Hz), 128.6 (d,  $J = 12.3$  Hz), 128.5 – 128.1 (m), 128.0, 35.4 (d,  $J = 74.2$  Hz), 27.0 - 26.9 (m), 26.5, 26.4;  $^{31}\text{P NMR}$  (162 MHz,  $\text{CDCl}_3$ )  $\delta$  35.8 (d,  $J = 13.2$  Hz), 18.3 (d,  $J = 13.5$  Hz). HRMS (ESI) calcd for  $\text{C}_{31}\text{H}_{31}\text{O}_2\text{P}_2^+$   $[\text{M}+\text{H}]^+$  497.1794, found 497.1793.

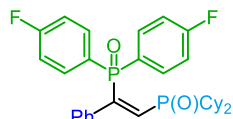

**(7a)** White solid (m.p.: 196 - 198 °C); 84% yield;  $^1\text{H NMR}$  (400 MHz,  $\text{CDCl}_3$ )  $\delta$  7.59 – 7.53 (m, 4H), 7.18 – 7.01 (m, 7H), 6.81 – 6.77 (m, 2H), 6.60 (dd,  $J = 38.3, 9.6$  Hz, 1H), 2.36 – 2.29 (m, 2H), 1.88 – 1.43 (m, 14H), 1.21 – 1.09 (m, 6H);  $^{13}\text{C NMR}$  (101 MHz,  $\text{CDCl}_3$ )  $\delta$  165.1 (dd,  $J = 255.3, 2.9$  Hz), 153.6 (d,  $J = 88.4$  Hz), 145.2 (d,  $J = 70.0$  Hz), 140.2 – 139.9 (m), 134.7 – 134.5 (m), 128.5, 128.2, 127.6 (dd,  $J = 108.6, 3.1$  Hz), 115.7 (dd,  $J = 21.5, 13.6$  Hz), 38.3 (d,  $J = 67.4$  Hz), 26.6 – 26.0 (m), 25.8;  $^{31}\text{P NMR}$  (162 MHz,  $\text{CDCl}_3$ )  $\delta$  47.6, 23.2 – 23.0 (m);  $^{19}\text{F NMR}$  (377 MHz,  $\text{CDCl}_3$ )  $\delta$  -105.8. HRMS (ESI) calcd for  $\text{C}_{32}\text{H}_{37}\text{F}_2\text{O}_2\text{P}_2^+$   $[\text{M}+\text{H}]^+$  553.2231, found 553.2235.

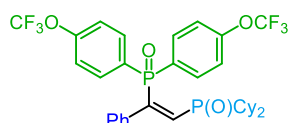

**(7b)** Colorless oil; 89% yield;  $^1\text{H NMR}$  (400 MHz,  $\text{CDCl}_3$ )  $\delta$  7.71 (dd,  $J = 11.4, 8.5$  Hz, 4H), 7.25 – 7.21 (m, 5H), 7.17 (t,  $J = 7.3$  Hz, 2H), 6.90 (d,  $J = 7.4$  Hz, 2H), 6.63 (dd,  $J = 38.4, 12.7$  Hz, 1H), 2.21 – 2.12 (m, 2H), 1.88 – 1.85 (m, 2H), 1.80 – 1.74 (m, 6H), 1.66 – 1.64 (m, 2H), 1.42 – 1.38 (m, 4H), 1.22 – 1.12 (m, 6H);  $^{13}\text{C NMR}$  (101 MHz,  $\text{CDCl}_3$ )  $\delta$  153.2 (d,  $J = 88.6$  Hz), 151.0 (q,  $J = 1.6$  Hz), 143.2 (dd,  $J = 72.3, 8.9$  Hz), 139.3 (dd,  $J = 13.9, 11.4$  Hz), 133.2 (d,  $J = 11.0$  Hz), 129.6 (d,  $J = 107.4$  Hz), 127.5, 127.4 (d,  $J = 3.3$  Hz), 127.3, 119.3 (q,  $J = 259.9$  Hz), 119.2 (d,  $J = 13.3$  Hz), 37.0 (d,  $J = 67.7$  Hz), 25.5 – 25.2 (m), 24.9 (d,  $J = 3.0$  Hz), 24.8;  $^{31}\text{P NMR}$  (162 MHz,  $\text{CDCl}_3$ )  $\delta$  45.6 (d,  $J = 9.1$  Hz), 22.7 (d,  $J = 12.1$  Hz);  $^{19}\text{F NMR}$  (377 MHz,  $\text{CDCl}_3$ )  $\delta$  -57.7. HRMS (ESI) calcd for  $\text{C}_{34}\text{H}_{37}\text{F}_6\text{O}_4\text{P}_2^+$   $[\text{M}+\text{H}]^+$  685.2066, found 685.2065.

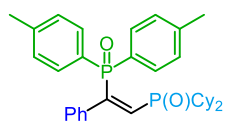

**(7c)** White solid (m.p.: 173 - 175 °C); 95% yield;  $^1\text{H NMR}$  (400 MHz,  $\text{CDCl}_3$ )  $\delta$  7.34 (dd,  $J = 11.7, 8.0$  Hz, 4H), 7.14 – 7.11 (m, 5H), 7.02 (t,  $J = 7.7$  Hz, 2H), 6.71 (d,  $J = 7.7$  Hz, 2H), 6.60 (dd,  $J = 37.6, 4.4$  Hz, 1H), 2.78 – 2.69 (m, 2H), 2.29 (s, 6H), 1.98 – 1.95 (m, 2H), 1.84 – 1.81 (m, 2H), 1.75 – 1.68 (m, 4H), 1.59 – 1.48 (m, 6H), 1.29 – 1.15 (m, 6H);  $^{13}\text{C NMR}$  (101 MHz,  $\text{CDCl}_3$ )  $\delta$  152.5 (d,  $J = 88.3$  Hz), 147.3 (d,  $J = 74.8$  Hz), 142.8 (d,  $J = 2.7$  Hz), 140.0 – 139.8 (m), 132.1 (d,  $J = 10.0$  Hz), 129.1 (d,  $J = 12.6$  Hz), 128.8 (d,  $J = 3.0$  Hz), 128.3, 128.0, 127.7 (d,  $J = 106.8$  Hz), 38.8

(d,  $J = 67.1$  Hz), 26.9 (d,  $J = 3.6$  Hz), 26.5 – 26.2 (m), 25.9, 21.6;  $^{31}\text{P}$  NMR (162 MHz,  $\text{CDCl}_3$ )  $\delta$  51.1, 24.4 (d,  $J = 10.3$  Hz). HRMS (ESI) calcd for  $\text{C}_{34}\text{H}_{43}\text{O}_2\text{P}_2^+$   $[\text{M}+\text{H}]^+$  545.2733, found 545.2730.

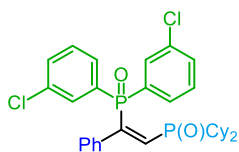

**(7d)** Colorless oil; 95% yield;  $^1\text{H}$  NMR (400 MHz,  $\text{CDCl}_3$ )  $\delta$  7.64 (d,  $J = 12.5$  Hz, 2H), 7.46 – 7.41 (m, 4H), 7.31 (td,  $J = 7.7, 3.5$  Hz, 2H), 7.23 (d,  $J = 7.1$  Hz, 1H), 7.18 (t,  $J = 7.4$  Hz, 2H), 6.91 (d,  $J = 7.4$  Hz, 2H), 6.65 (dd,  $J = 38.6, 13.1$  Hz, 1H), 2.22 – 2.14 (m, 2H), 1.92 – 1.89 (m, 2H), 1.82 – 1.76 (m, 6H), 1.69 – 1.66 (m, 2H), 1.48 – 1.39 (m, 4H), 1.27 – 1.17 (m, 6H);  $^{13}\text{C}$  NMR (101 MHz,  $\text{CDCl}_3$ )  $\delta$  153.9 (d,  $J = 88.2$  Hz), 144.5 (dd,  $J = 71.9, 8.7$  Hz), 140.0 (dd,  $J = 13.7, 11.7$  Hz), 134.8 (d,  $J = 16.4$  Hz), 134.1 (d,  $J = 104.4$  Hz), 132.3 (d,  $J = 2.3$  Hz), 131.8 (d,  $J = 10.8$  Hz), 130.0 (d,  $J = 9.3$  Hz), 129.8 (d,  $J = 13.5$  Hz), 128.6, 128.38 – 128.35 (m), 37.9 (d,  $J = 67.8$  Hz), 26.6 – 26.3 (m), 25.9 (d,  $J = 3.0$  Hz), 25.8;  $^{31}\text{P}$  NMR (162 MHz,  $\text{CDCl}_3$ )  $\delta$  46.1, 22.9 (d,  $J = 11.9$  Hz). HRMS (ESI) calcd for  $\text{C}_{32}\text{H}_{37}\text{Cl}_2\text{O}_2\text{P}_2^+$   $[\text{M}+\text{H}]^+$  585.1640, found 585.1641.

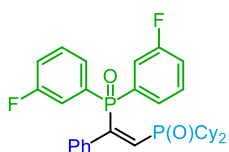

**(7e)** White solid (m.p.: 75 – 77 °C); 85% yield;  $^1\text{H}$  NMR (400 MHz,  $\text{CDCl}_3$ )  $\delta$  7.41 – 7.34 (m, 6H), 7.27 – 7.17 (m, 5H), 6.92 (d,  $J = 7.5$  Hz, 2H), 6.71 (dd,  $J = 38.6, 11.8$  Hz, 1H), 2.35 – 2.27 (m, 2H), 1.98 – 1.70 (m, 10H), 1.56 – 1.45 (m, 4H), 1.31 – 1.20 (m, 6H);  $^{13}\text{C}$  NMR (101 MHz,  $\text{CDCl}_3$ )  $\delta$  162.2 (dd,  $J = 251.3, 17.5$  Hz), 153.4 (d,  $J = 86.8$  Hz), 145.4 (d,  $J = 68.1$  Hz), 140.1 – 139.9 (m), 134.4 (dd,  $J = 105.1, 5.6$  Hz), 130.3 (dd,  $J = 14.5, 7.4$  Hz), 128.6, 128.4 – 128.3 (m), 127.7 (dd,  $J = 9.1, 2.9$  Hz), 119.3 (d,  $J = 21.2$  Hz), 118.8 (dd,  $J = 22.8, 10.6$  Hz), 38.0 (d,  $J = 67.9$  Hz), 26.6 – 26.3 (m), 25.9 (d,  $J = 2.4$  Hz), 25.8;  $^{31}\text{P}$  NMR (162 MHz,  $\text{CDCl}_3$ )  $\delta$  46.2, 22.4;  $^{19}\text{F}$  NMR (377 MHz,  $\text{CDCl}_3$ )  $\delta$  -110.9. HRMS (ESI) calcd for  $\text{C}_{32}\text{H}_{37}\text{F}_2\text{O}_2\text{P}_2^+$   $[\text{M}+\text{H}]^+$  553.2231, found 553.2232.

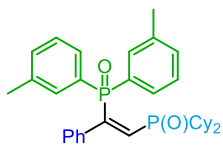

**(7f)** White solid (m.p.: 153 – 155 °C); 80% yield;  $^1\text{H}$  NMR (400 MHz,  $\text{CDCl}_3$ )  $\delta$  7.38 (d,  $J = 12.5$  Hz, 2H), 7.28 – 7.15 (m, 7H) (overlap one peak of 7.26), 7.07 (t,  $J = 6.8$  Hz, 2H), 6.75 – 6.73 (m, 2H), 6.70 – 6.60 (m, 1H), 2.75 – 2.70 (m, 2H), 2.27 (s, 6H), 2.02 – 1.98 (m, 2H), 1.84 – 1.53 (m, 12H), 1.32 – 1.14 (m, 6H);  $^{13}\text{C}$  NMR (101 MHz,  $\text{CDCl}_3$ )  $\delta$  152.4 (d,  $J = 87.2$  Hz), 147.5 (d,  $J = 73.2$  Hz), 140.1 – 139.8 (m), 138.3 (d,  $J = 12.2$  Hz), 133.0 (d,  $J = 2.8$  Hz), 132.6 (d,  $J = 9.5$  Hz), 130.9 (d,  $J = 103.9$  Hz), 129.2 (d,  $J = 9.8$  Hz), 128.9 (d,  $J = 3.2$  Hz), 128.3, 128.1, 128.0, 38.8 (d,  $J = 67.0$  Hz), 26.9 (d,  $J = 3.7$  Hz), 26.5 (d,  $J = 13.6$  Hz), 26.4, 26.3 (d,  $J = 8.9$  Hz), 25.9, 21.4;  $^{31}\text{P}$  NMR (162 MHz,  $\text{CDCl}_3$ )  $\delta$  50.4, 24.5 (d,  $J = 11.3$  Hz). HRMS (ESI) calcd for  $\text{C}_{34}\text{H}_{43}\text{O}_2\text{P}_2^+$   $[\text{M}+\text{H}]^+$  545.2733, found 545.2729.

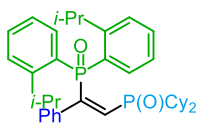

**(7g)** White solid (m.p.: 284 – 286 °C); 90% yield;  $^1\text{H}$  NMR (400 MHz,  $\text{CDCl}_3$ )  $\delta$  7.46 – 6.89 (m, 14H) (overlap one peak of 7.26), 3.67 – 3.59 (m, 2H), 2.59 – 2.47 (m, 2H), 1.94 – 0.76 (m, 32H);  $^{13}\text{C}$  NMR (101 MHz,  $\text{CDCl}_3$ )  $\delta$  154.5, 152.5 (d,  $J = 85.6$  Hz), 148.9 (dd,  $J = 73.0, 6.9$  Hz), 140.0 – 139.8 (m), 133.4 (d,  $J = 14.4$  Hz), 132.5, 130.2 (d,  $J = 103.3$  Hz), 128.6 (d,  $J = 3.7$  Hz), 128.2, 127.6, 127.1, 125.2, 38.1 (d,  $J = 66.5$  Hz), 31.8 (d,  $J = 4.8$  Hz), 26.6 – 22.9 (m);  $^{31}\text{P}$  NMR (162 MHz,  $\text{CDCl}_3$ )  $\delta$  50.9 (d,  $J = 6.1$  Hz), 35.1 (d,  $J = 10.6$  Hz). HRMS (ESI) calcd for  $\text{C}_{38}\text{H}_{51}\text{O}_2\text{P}_2^+$   $[\text{M}+\text{H}]^+$  601.3359, found 601.3369.

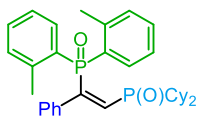

**(7h)** Colorless oil; 86% yield;  $^1\text{H}$  NMR (400 MHz,  $\text{CDCl}_3$ )  $\delta$  7.34 – 7.26 (m, 4H), 7.16 – 6.91 (m, 10H), 2.52 – 2.44 (m, 8H), 1.95 – 1.91 (m, 2H), 1.78 – 1.72 (m, 2H), 1.69 – 1.65 (m, 2H), 1.55 – 1.45 (m, 8H), 1.15 – 1.03 (m, 4H), 0.78 – 0.62 (m, 2H);  $^{13}\text{C}$  NMR (101 MHz,  $\text{CDCl}_3$ )  $\delta$  152.1 (d,  $J = 85.8$  Hz), 148.7 (d,  $J = 72.7$  Hz), 143.0 (d,  $J = 7.8$  Hz), 140.0 (dd,  $J = 13.5, 12.1$  Hz), 133.2 (d,  $J = 13.4$  Hz), 132.2 (d,  $J = 2.5$  Hz), 131.8 (d,  $J = 10.7$  Hz), 130.3 (d,  $J = 102.9$  Hz), 128.4 (d,  $J = 3.7$  Hz), 128.2, 127.8, 125.4 (d,  $J = 13.2$  Hz), 38.4 (d,  $J = 66.8$  Hz), 26.6 (d,  $J = 3.7$  Hz), 26.4 – 26.0 (m), 25.8, 21.7 (d,  $J = 4.2$  Hz);  $^{31}\text{P}$  NMR (162 MHz,  $\text{CDCl}_3$ )  $\delta$  49.7, 34.2 (d,  $J = 10.8$  Hz). HRMS (ESI) calcd for  $\text{C}_{34}\text{H}_{43}\text{O}_2\text{P}_2^+$   $[\text{M}+\text{H}]^+$  545.2733, found 545.2734.

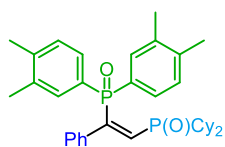

**(7i)** White solid (m.p.: 130 - 132 °C); 70% yield;  $^1\text{H NMR}$  (400 MHz,  $\text{CDCl}_3$ )  $\delta$  7.32 (d,  $J = 12.2$  Hz, 2H), 7.21 – 7.07 (m, 7H), 6.75 (d,  $J = 7.5$  Hz, 2H), 6.65 (dd,  $J = 37.5, 3.5$  Hz, 1H), 2.91 – 2.83 (m, 2H), 2.27 (s, 6H), 2.20 (s, 6H), 2.05 – 2.02 (m, 2H), 1.93 – 1.88 (m, 2H), 1.82 – 1.74 (m, 4H), 1.66 – 1.53 (m, 6H), 1.33 – 1.23 (m, 6H);  $^{13}\text{C NMR}$  (101 MHz,  $\text{CDCl}_3$ )  $\delta$  151.7 (d,  $J = 87.1$  Hz), 146.0 (dd,  $J = 72.4, 6.3$  Hz), 140.5 (d,  $J = 2.8$  Hz), 138.9 (t,  $J = 13.3$  Hz), 136.0 (d,  $J = 12.5$  Hz), 132.1 (d,  $J = 9.9$  Hz), 128.7 (d,  $J = 9.8$  Hz), 128.6 (d,  $J = 13.0$  Hz), 128.0 (d,  $J = 3.1$  Hz), 127.2, 126.91, 126.88 (d,  $J = 106.1$  Hz), 37.9 (d,  $J = 67.0$  Hz), 25.9 (d,  $J = 3.7$  Hz), 25.6 – 25.3 (m), 24.9, 19.0, 18.7;  $^{31}\text{P NMR}$  (162 MHz,  $\text{CDCl}_3$ )  $\delta$  52.3, 24.5 (d,  $J = 11.3$  Hz). HRMS (ESI) calcd for  $\text{C}_{36}\text{H}_{47}\text{O}_2\text{P}_2^+$   $[\text{M}+\text{H}]^+$  573.3046, found 573.3044.

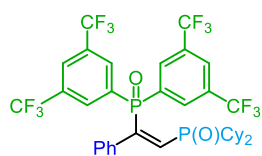

**(7j)** White solid (m.p.: 218 - 219 °C); 72% yield;  $^1\text{H NMR}$  (400 MHz,  $\text{CDCl}_3$ )  $\delta$  8.10 (d,  $J = 11.9$  Hz, 4H), 7.90 (s, 2H), 7.26 – 7.21 (m, 3H), 7.03 – 7.01 (m, 2H), 6.78 (dd,  $J = 39.4, 20.1$  Hz, 1H), 1.81 – 1.68 (m, 12H), 1.30 – 1.17 (m, 10H);  $^{13}\text{C NMR}$  (101 MHz,  $\text{CDCl}_3$ )  $\delta$  154.8 (d,  $J = 91.2$  Hz), 142.9 (dd,  $J = 70.4, 9.9$  Hz), 140.1 (dd,  $J = 13.9, 11.2$  Hz), 137.0 (d,  $J = 106.9$  Hz), 132.2 – 131.0 (m), 128.8 – 128.7 (m), 127.8 (d,  $J = 3.8$  Hz), 125.4 – 125.2 (m), 122.7 (q,  $J = 274.2$  Hz), 36.8 (d,  $J = 68.0$  Hz), 26.5 – 26.1 (m), 25.6, 25.3 (d,  $J = 2.9$  Hz);  $^{31}\text{P NMR}$  (162 MHz,  $\text{CDCl}_3$ )  $\delta$  42.6 (d,  $J = 9.0$  Hz), 20.4 (d,  $J = 12.6$  Hz);  $^{19}\text{F NMR}$  (377 MHz,  $\text{CDCl}_3$ )  $\delta$  -63.0. HRMS (ESI) calcd for  $\text{C}_{36}\text{H}_{35}\text{F}_{12}\text{O}_2\text{P}_2^+$   $[\text{M}+\text{H}]^+$  789.1915, found 789.1900.

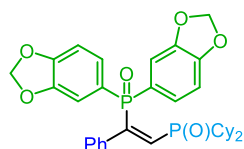

**(7k)** White solid (m.p.: 154 - 156 °C); 96% yield;  $^1\text{H NMR}$  (400 MHz,  $\text{CDCl}_3$ )  $\delta$  7.19 – 7.16 (m, 1H), 7.11 – 7.02 (m, 4H), 6.84 (dd,  $J = 11.4, 1.2$  Hz, 2H), 6.79 – 6.75 (m, 4H), 6.60 (dd,  $J = 38.0, 6.1$  Hz, 1H), 5.94 (s, 4H), 2.67 – 2.55 (m, 2H), 1.97 – 1.92 (m, 2H), 1.83 – 1.72 (m, 6H), 1.62 – 1.47 (m, 6H), 1.24 – 1.11 (m, 6H);  $^{13}\text{C NMR}$  (101 MHz,  $\text{CDCl}_3$ )  $\delta$  152.8 (d,  $J = 89.6$  Hz), 151.1 (d,  $J = 2.8$  Hz), 147.9 (d,  $J = 18.6$  Hz), 146.7 (d,  $J = 79.6$  Hz), 140.2 – 139.9 (m), 128.7 (d,  $J = 2.8$  Hz), 128.4, 128.1, 127.7 (d,  $J = 10.9$  Hz), 124.0 (d,  $J = 109.9$  Hz), 111.4 (d,  $J = 12.6$  Hz), 108.6 (d,  $J = 15.5$  Hz), 101.8, 38.6 (d,  $J = 67.2$  Hz), 26.8 (d,  $J = 3.5$  Hz), 26.5 – 26.3 (m), 25.8;  $^{31}\text{P NMR}$  (162 MHz,  $\text{CDCl}_3$ )  $\delta$  50.4, 24.4. HRMS (ESI) calcd for  $\text{C}_{34}\text{H}_{39}\text{O}_6\text{P}_2^+$   $[\text{M}+\text{H}]^+$  605.2217, found 605.2209.

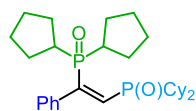

**(7l)** White solid (m.p.: 272 - 274 °C); 90% yield;  $^1\text{H NMR}$  (400 MHz,  $\text{CDCl}_3$ )  $\delta$  7.29 (s, 5H), 6.17 – 6.00 (m, 1H), 3.14 – 3.03 (m, 2H), 1.96 – 1.75 (m, 18H), 1.72 – 1.36 (m, 15H), 1.22 – 1.18 (m, 5H);  $^{13}\text{C NMR}$  (101 MHz,  $\text{CDCl}_3$ )  $\delta$  161.6 (d,  $J = 56.2$  Hz), 142.2, 133.6 (d,  $J = 73.2$  Hz), 128.4, 128.2, 127.9, 39.8 (d,  $J = 69.0$  Hz), 37.0 (d,  $J = 69.2$  Hz), 27.8 (d,  $J = 2.1$  Hz), 26.6 – 26.3 (m), 25.9 – 25.8 (m), 25.3 (d,  $J = 3.0$  Hz);  $^{31}\text{P NMR}$  (162 MHz,  $\text{CDCl}_3$ )  $\delta$  46.0, 43.1. HRMS (ESI) calcd for  $\text{C}_{30}\text{H}_{47}\text{O}_2\text{P}_2^+$   $[\text{M}+\text{H}]^+$  501.3046, found 501.3038.

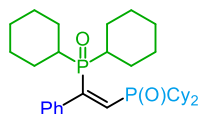

**(7m)** White solid (m.p.: 247 - 248 °C); 97% yield;  $^1\text{H NMR}$  (400 MHz,  $\text{CD}_3\text{OD}$ )  $\delta$  7.41 – 7.29 (m, 5H), 6.44 (dd,  $J = 33.8, 20.2$  Hz, 1H), 2.91 – 2.84 (m, 2H), 2.17 – 2.06 (m, 6H), 1.94 – 1.71 (m, 16H), 1.60 – 1.22 (m, 20H);  $^{13}\text{C NMR}$  (101 MHz,  $\text{CD}_3\text{OD}$ )  $\delta$  159.2 (d,  $J = 65.8$  Hz), 141.8 (dd,  $J = 15.8, 6.3$  Hz), 135.2 (d,  $J = 76.8$  Hz), 128.3 (d,  $J = 2.4$  Hz), 128.1, 127.8, 39.4 (d,  $J = 63.7$  Hz), 36.9 (d,  $J = 68.6$  Hz), 26.5 (d,  $J = 3.4$  Hz), 26.4 (d,  $J = 3.6$  Hz), 26.2 – 25.5 (m);  $^{31}\text{P NMR}$  (162 MHz,  $\text{CD}_3\text{OD}$ )  $\delta$  52.6 (d,  $J = 11.2$  Hz), 46.4 (d,  $J = 5.4$  Hz). HRMS (ESI) calcd for  $\text{C}_{32}\text{H}_{51}\text{O}_2\text{P}_2^+$   $[\text{M}+\text{H}]^+$  529.3359, found 529.3359.

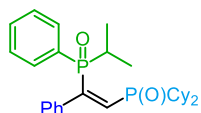

**(7n)** White solid (m.p.: 180 - 182 °C); 90% yield;  $^1\text{H NMR}$  (400 MHz,  $\text{CDCl}_3$ )  $\delta$  7.42 – 7.31 (m, 3H), 7.24 – 7.16 (m, 5H), 6.92 (d,  $J = 6.6$  Hz, 2H), 6.24 (dd,  $J = 35.9, 9.9$  Hz, 1H), 2.99 – 2.90 (m, 1H), 2.42 – 2.18 (m, 2H), 1.96 – 1.89 (m, 1H), 1.80 – 1.66 (m, 4H), 1.58 – 1.43 (m, 7H), 1.35 – 1.16 (m, 7H), 1.10 – 0.87 (m, 7H);  $^{13}\text{C NMR}$  (101 MHz,  $\text{CDCl}_3$ )  $\delta$  155.2 (d,  $J = 75.9$  Hz), 142.8 (d,  $J = 72.9$  Hz), 140.4 – 140.2 (m), 131.9 (d,  $J = 8.5$  Hz), 131.7 (d,  $J = 2.1$  Hz), 130.7 (d,  $J = 94.4$  Hz), 128.3, 128.1, 128.0 (d,  $J = 11.4$  Hz), 38.5 (d,  $J = 67.7$  Hz), 37.5 (d,  $J = 67.2$  Hz), 26.6 – 25.1 (m), 15.5 (d,  $J = 2.7$  Hz), 14.9 (d,  $J = 2.6$  Hz);  $^{31}\text{P NMR}$  (162 MHz,  $\text{CDCl}_3$ )  $\delta$  48.4, 37.6 (d,  $J = 10.5$  Hz). HRMS (ESI) calcd for  $\text{C}_{29}\text{H}_{41}\text{O}_2\text{P}_2^+$   $[\text{M}+\text{H}]^+$  483.2577, found 483.2570.

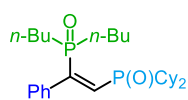

**(7o)** White solid (m.p.: 169 - 171 °C); 86% yield;  $^1\text{H NMR}$  (400 MHz,  $\text{CDCl}_3$ )  $\delta$  7.32 – 7.23 (m, 5H), 6.16 – 6.03 (m, 1H), 2.46 – 2.37 (m, 2H), 2.27 – 2.16 (m, 2H), 1.96 – 1.93 (m, 2H), 1.88 – 1.67 (m, 12H), 1.57 – 1.45 (m, 2H), 1.40 – 1.16 (m, 14H), 0.84 (t,  $J = 7.3$  Hz, 6H);  $^{13}\text{C NMR}$  (101 MHz,  $\text{CDCl}_3$ )  $\delta$  160.2 (d,  $J = 69.3$  Hz), 141.9 – 141.7 (m), 134.2 (d,  $J = 82.9$  Hz), 128.4, 128.3, 128.0, 36.3 (d,  $J = 68.8$  Hz), 31.0 (d,  $J = 66.8$  Hz), 26.5 – 26.2 (m), 25.8, 25.1 (d,  $J = 2.2$  Hz), 24.2 (d,  $J = 16.3$  Hz), 23.9 (d,  $J = 4.6$  Hz), 13.8;  $^{31}\text{P NMR}$  (162 MHz,  $\text{CDCl}_3$ )  $\delta$  43.4. HRMS (ESI) calcd for  $\text{C}_{28}\text{H}_{47}\text{O}_2\text{P}_2^+$   $[\text{M}+\text{H}]^+$  477.3046, found 477.3040.

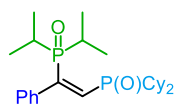

**(7p)** White solid (m.p.: 278 - 280 °C); 84% yield;  $^1\text{H NMR}$  (400 MHz,  $\text{CDCl}_3$ )  $\delta$  7.34 – 7.30 (m, 5H), 6.21 (dd,  $J = 31.7, 19.3$  Hz, 1H), 3.05 – 2.96 (m, 2H), 1.99 – 1.71 (m, 12H), 1.45 – 1.16 (m, 22H);  $^{13}\text{C NMR}$  (101 MHz,  $\text{CDCl}_3$ )  $\delta$  160.2 (d,  $J = 66.2$  Hz), 142.0, 134.8 (d,  $J = 86.9$  Hz), 128.6 (d,  $J = 2.5$  Hz), 128.4, 128.0, 37.3 (d,  $J = 68.9$  Hz), 29.3 (d,  $J = 64.1$  Hz), 26.6 – 26.4 (m), 25.8, 25.5 (d,  $J = 3.2$  Hz), 17.9 (d,  $J = 3.9$  Hz), 16.6 (d,  $J = 3.4$  Hz);  $^{31}\text{P NMR}$  (162 MHz,  $\text{CDCl}_3$ )  $\delta$  54.2, 43.4. HRMS (ESI) calcd for  $\text{C}_{26}\text{H}_{43}\text{O}_2\text{P}_2^+$   $[\text{M}+\text{H}]^+$  449.2733, found 449.2739.

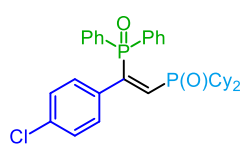

**(7q)** White solid (m.p.: 70 - 72 °C); 85% yield;  $^1\text{H NMR}$  (400 MHz,  $\text{CDCl}_3$ )  $\delta$  7.57 – 7.49 (m, 6H), 7.40 – 7.37 (m, 4H), 7.06 (d,  $J = 8.4$  Hz, 2H), 6.73 – 6.62 (m, 3H), 2.55 – 2.45 (m, 2H), 1.95 – 1.49 (m, 14H), 1.26 – 1.16 (m, 6H);  $^{13}\text{C NMR}$  (101 MHz,  $\text{CDCl}_3$ )  $\delta$  152.3 (d,  $J = 94.5$  Hz), 146.7 (d,  $J = 80.0$  Hz), 138.6 – 138.4 (m), 134.6, 132.5, 132.1 (d,  $J = 9.8$  Hz), 131.0 (d,  $J = 104.8$  Hz), 130.0 (d,  $J = 2.9$  Hz), 128.6, 128.4 (d,  $J = 13.4$  Hz), 38.5 (d,  $J = 67.5$  Hz), 26.7 – 26.2 (m), 25.8;  $^{31}\text{P NMR}$  (162 MHz,  $\text{CDCl}_3$ )  $\delta$  48.7, 24.6. HRMS (ESI) calcd for  $\text{C}_{32}\text{H}_{38}\text{ClO}_2\text{P}_2^+$   $[\text{M}+\text{H}]^+$  551.2031, found 551.2029.

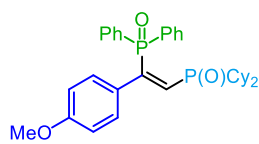

**(7r)** White solid (m.p.: 118 - 120 °C); 76% yield;  $^1\text{H NMR}$  (400 MHz,  $\text{CDCl}_3$ )  $\delta$  7.56 – 7.46 (m, 6H), 7.38 – 7.34 (m, 4H), 6.69 – 6.58 (m, 5H), 3.68 (s, 3H), 2.64 – 2.57 (m, 2H), 1.98 – 1.95 (m, 2H), 1.80 – 1.48 (m, 12H), 1.29 – 1.09 (m, 6H);  $^{13}\text{C NMR}$  (101 MHz,  $\text{CDCl}_3$ )  $\delta$  159.7, 152.0 (d,  $J = 87.7$  Hz), 146.7 (d,  $J = 79.3$  Hz), 132.2 – 131.0 (m), 130.1 (d,  $J = 3.3$  Hz), 128.4 (d,  $J = 12.2$  Hz), 113.5, 55.2, 38.7 (d,  $J = 67.4$  Hz), 26.8 (d,  $J = 3.5$  Hz), 26.5 – 26.3 (m), 25.9;  $^{31}\text{P NMR}$  (162 MHz,  $\text{CDCl}_3$ )  $\delta$  49.6, 24.4 (d,  $J = 8.6$  Hz). HRMS (ESI) calcd for  $\text{C}_{33}\text{H}_{41}\text{O}_3\text{P}_2^+$   $[\text{M}+\text{H}]^+$  547.2526, found 547.2521.

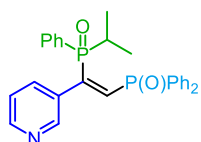

**(7s)** White solid (m.p.: 126 – 128 °C); 80% yield;  $^1\text{H NMR}$  (400 MHz,  $\text{CDCl}_3$ )  $\delta$  8.47 – 8.32 (m, 2H), 7.87 – 7.83 (m, 2H), 7.72 – 7.65 (m, 3H), 7.49 – 7.23 (m, 12H), 6.79 (dd,  $J = 33.3, 20.1$  Hz, 1H), 3.89 – 3.81 (m, 1H), 1.23 – 1.16 (m, 3H), 1.15 – 1.09 (m, 3H);  $^{13}\text{C NMR}$  (101 MHz,  $\text{CDCl}_3$ )  $\delta$  154.5 (d,  $J = 69.9$  Hz), 149.0, 147.8, 138.2 (dd,  $J = 92.3, 9.0$  Hz), 137.5, 137.0, 133.3 – 131.2 (m), 131.0 (d,  $J = 9.6$  Hz), 130.6 (d,  $J = 10.0$  Hz), 128.9 (d,  $J = 12.3$  Hz), 128.7 (d,  $J = 12.5$  Hz), 128.3 (d,  $J = 11.8$  Hz), 122.6, 26.3 (d,  $J = 70.4$  Hz), 15.6 (d,  $J = 3.2$  Hz), 15.3 (d,  $J = 3.2$  Hz);  $^{31}\text{P NMR}$  (162 MHz,  $\text{CDCl}_3$ )  $\delta$  38.8 (d,  $J = 13.0$  Hz), 18.3 (d,  $J = 13.0$  Hz). HRMS (ESI) calcd for  $\text{C}_{28}\text{H}_{28}\text{NO}_2\text{P}_2^+$   $[\text{M}+\text{H}]^+$  472.1590, found 472.1588.

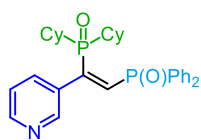

**(7t)** Yellow solid (m.p.: 267 - 269 °C); 80% yield;  $^1\text{H NMR}$  (400 MHz,  $\text{CDCl}_3$ )  $\delta$  8.50 – 8.43 (m, 2H), 7.83 (d,  $J = 7.9$  Hz, 1H), 7.73 – 7.68 (m, 4H), 7.57 – 7.46 (m, 6H), 7.25 – 7.22 (m, 1H), 6.89 (dd,  $J = 30.5, 21.9$  Hz, 1H), 2.99 – 2.91 (m, 2H), 2.06 – 2.03 (m, 2H), 1.76 – 1.69 (m, 4H), 1.60 – 1.55 (m, 6H), 1.49 – 1.39 (m, 2H), 1.32 – 1.22 (m, 2H), 1.18 – 1.08 (m, 2H), 0.98 – 0.88 (m, 2H);  $^{13}\text{C NMR}$  (101 MHz,  $\text{CDCl}_3$ )  $\delta$  154.9 (dd,  $J = 61.0, 2.6$  Hz), 149.2, 148.2, 137.9, 137.1, 135.4 (dd,  $J = 94.1, 8.4$  Hz), 132.6 (d,  $J = 107.0$  Hz), 132.4 (d,  $J = 2.5$  Hz), 130.8 (d,  $J = 9.6$  Hz), 129.1 (d,  $J = 12.1$  Hz), 122.3, 39.2 (d,  $J = 64.2$  Hz), 26.5 (d,  $J = 4.0$  Hz), 26.3 (d,  $J = 3.7$  Hz), 26.2 (d,  $J = 2.2$  Hz), 26.1 (d,  $J = 1.9$  Hz), 25.6;  $^{31}\text{P NMR}$  (162 MHz,  $\text{CDCl}_3$ )  $\delta$  51.4 (d,  $J = 10.8$  Hz), 18.3 (d,  $J = 10.1$  Hz). HRMS (ESI) calcd for  $\text{C}_{31}\text{H}_{38}\text{NO}_2\text{P}_2^+$   $[\text{M}+\text{H}]^+$  518.2372, found 518.2372.

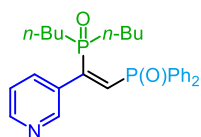

**(7u)** White solid (m.p.: 183 - 185 °C); 85% yield;  $^1\text{H NMR}$  (400 MHz,  $\text{CDCl}_3$ )  $\delta$  8.52 (d,  $J = 4.4$  Hz, 1H), 8.47 (s, 1H), 7.82 (d,  $J = 8.0$  Hz, 1H), 7.73 – 7.67 (m, 4H), 7.57 – 7.53 (m, 2H), 7.51 – 7.46 (m, 4H), 7.26 (dd,  $J = 7.9, 4.9$  Hz, 1H), 6.88 (dd,  $J = 32.0, 21.1$  Hz, 1H), 2.69 – 2.58 (m, 2H), 2.32 – 2.21 (m, 2H), 1.72 – 1.59 (m, 2H), 1.44 – 1.33 (m, 2H), 1.32 – 1.23 (m, 2H), 1.22 – 1.13 (m, 2H), 0.76 (t,  $J = 7.3$  Hz, 6H);  $^{13}\text{C NMR}$  (101 MHz,  $\text{CDCl}_3$ )  $\delta$  155.2 (dd,  $J = 66.6, 2.5$  Hz), 149.6, 148.1 (d,  $J = 2.9$  Hz), 137.5 (dd,  $J = 17.9, 6.3$  Hz), 136.7 (d,  $J = 1.3$  Hz), 136.1 (dd,  $J = 92.9, 9.3$  Hz), 132.53 (d,  $J = 107.5$  Hz), 132.46 (d,  $J = 2.7$  Hz), 130.9 (d,  $J = 9.6$  Hz), 129.1 (d,  $J = 12.3$  Hz), 122.4, 31.0 (d,  $J = 67.0$  Hz), 24.0 (d,  $J = 16.1$  Hz), 23.8 (d,  $J = 4.9$  Hz), 13.6;  $^{31}\text{P NMR}$  (162 MHz,  $\text{CDCl}_3$ )  $\delta$  45.1 (d,  $J = 12.1$  Hz), 18.4 (d,  $J = 12.1$  Hz). HRMS (ESI) calcd for  $\text{C}_{27}\text{H}_{34}\text{NO}_2\text{P}_2^+$   $[\text{M}+\text{H}]^+$  466.2059, found 466.2059.

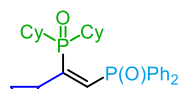

**(7v)** White solid (m.p.: 209 - 211 °C); 94% yield;  $^1\text{H NMR}$  (400 MHz,  $\text{CDCl}_3$ )  $\delta$  7.60 (dd,  $J = 11.9, 7.0$  Hz, 4H), 7.50 – 7.47 (m, 2H), 7.45 – 7.41 (m, 4H), 6.04 (dd,  $J = 33.1, 20.5$  Hz, 1H), 2.76 – 2.68 (m, 2H), 2.42 – 2.35 (m, 1H), 2.03 – 2.00 (m, 2H), 1.72 – 1.70 (m, 2H), 1.62 – 1.52 (m, 8H), 1.44 – 1.34 (m, 2H), 1.27 – 0.99 (m, 6H), 0.91 – 0.81 (m, 2H), 0.60 – 0.56 (m, 2H);  $^{13}\text{C NMR}$  (101 MHz,  $\text{CDCl}_3$ )  $\delta$  161.7 (d,  $J = 64.6$  Hz), 132.8 (d,  $J = 106.9$  Hz), 130.9 (d,  $J = 2.6$  Hz), 129.7 (d,  $J = 9.6$  Hz), 127.8 (d,  $J = 12.1$  Hz), 120.5 (d,  $J = 111.0$  Hz), 37.4 (d,  $J = 64.3$  Hz), 25.3 – 24.7 (m), 15.8 (dd,  $J = 18.4, 10.3$  Hz), 11.4;  $^{31}\text{P NMR}$  (162 MHz,  $\text{CDCl}_3$ )  $\delta$  52.7, 19.4. HRMS (ESI) calcd for  $\text{C}_{29}\text{H}_{38}\text{O}_2\text{P}_2\text{Na}^+$   $[\text{M}+\text{Na}]^+$  503.2240, found 503.2240.

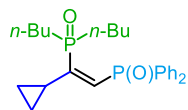

**(7w)** White solid (m.p.: 91 - 93 °C); 96% yield;  $^1\text{H NMR}$  (400 MHz,  $\text{CDCl}_3$ )  $\delta$  7.62 – 7.57 (m, 4H), 7.51 – 7.48 (m, 2H), 7.44 – 7.41 (m, 4H), 6.10 (dd,  $J = 34.7, 20.1$  Hz, 1H), 2.46 – 2.37 (m, 3H), 2.20 – 2.10 (m, 2H), 1.63 – 1.55 (m, 2H), 1.37 – 1.23 (m, 4H), 1.18 – 1.04 (m, 4H), 0.74 (t,  $J = 7.2$  Hz, 6H), 0.60 – 0.59 (m, 2H);  $^{13}\text{C NMR}$  (101 MHz,  $\text{CDCl}_3$ )  $\delta$  161.7 (d,  $J = 69.5$  Hz), 132.7 (d,  $J = 107.2$  Hz), 131.0 (d,  $J = 2.6$  Hz), 129.8 (d,  $J = 9.6$  Hz), 127.8 (d,  $J = 12.2$  Hz), 121.7 (d,  $J = 100.1$  Hz), 29.4 (d,  $J = 66.6$  Hz), 23.0 (d,  $J = 15.8$  Hz), 22.7 (d,  $J = 4.8$  Hz), 16.2 (dd,  $J = 18.3, 11.2$  Hz), 12.6, 10.8;  $^{31}\text{P NMR}$  (162 MHz,  $\text{CDCl}_3$ )  $\delta$  46.4 (d,  $J = 14.3$  Hz), 19.5 (d,  $J = 15.1$  Hz). HRMS (ESI) calcd for  $\text{C}_{25}\text{H}_{35}\text{O}_2\text{P}_2^+$   $[\text{M}+\text{H}]^+$  429.2107, found 429.2100.

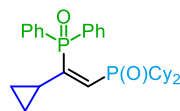

**(7x)** White solid (m.p.: 301 - 303 °C); 76% yield;  $^1\text{H NMR}$  (400 MHz,  $\text{CDCl}_3$ )  $\delta$  7.66 – 7.61 (m, 4H), 7.51 – 7.47 (m, 2H), 7.43 – 7.38 (m, 4H), 6.06 (d,  $J = 40.1$  Hz, 1H), 2.59 – 2.51 (m, 2H), 1.90 – 1.87 (m, 2H), 1.67 – 1.28 (m, 13H), 1.20 – 1.02 (m, 4H), 0.95 – 0.86 (m, 2H), 0.69 – 0.57 (m, 4H);  $^{13}\text{C NMR}$  (101 MHz,  $\text{CDCl}_3$ )  $\delta$  152.4 (d,  $J = 89.3$  Hz), 136.7 (d,  $J = 85.1$  Hz), 132.2 (d,  $J = 2.7$  Hz), 131.8 (d,  $J = 9.9$  Hz), 131.7 (d,  $J = 104.0$  Hz), 128.6 (d,  $J = 12.0$  Hz), 38.6 (d,  $J = 67.3$  Hz), 26.7 (d,  $J = 3.6$  Hz), 26.4 – 26.3 (m), 26.2 (d,  $J = 2.4$  Hz), 25.8, 17.6 (dd,  $J = 20.0, 14.0$  Hz), 11.6 (d,  $J = 2.4$  Hz);  $^{31}\text{P NMR}$  (162 MHz,  $\text{CDCl}_3$ )  $\delta$  51.7 (d,  $J = 10.9$  Hz), 28.3 (d,  $J = 13.8$  Hz). HRMS (ESI) calcd for  $\text{C}_{29}\text{H}_{39}\text{O}_2\text{P}_2^+$   $[\text{M}+\text{H}]^+$  481.2420, found 481.2413.

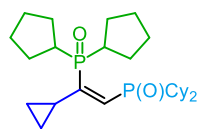

**(7y)** White solid (m.p.: 231 - 233 °C); 84% yield;  $^1\text{H NMR}$  (400 MHz,  $\text{CDCl}_3$ )  $\delta$  5.34 (dd,  $J = 34.0, 16.3$  Hz, 1H), 2.86 (brs, 2H), 2.20 (brs, 1H), 1.89 – 1.14 (m, 38H), 0.95 – 0.91 (m, 2H), 0.51 – 0.46 (m, 2H);  $^{13}\text{C NMR}$  (101 MHz,  $\text{CDCl}_3$ )  $\delta$  163.5, 120.6, 38.7 (d,  $J = 68.4$  Hz), 37.1 (d,  $J = 69.5$  Hz), 27.5 (d,  $J = 1.3$  Hz), 26.5 – 25.7 (m), 25.2, 16.8 – 16.6 (m), 11.4;  $^{31}\text{P NMR}$  (162 MHz,  $\text{CDCl}_3$ )  $\delta$  48.2 (d,  $J = 13.0$  Hz), 43.3. HRMS (ESI) calcd for  $\text{C}_{27}\text{H}_{47}\text{O}_2\text{P}_2^+$   $[\text{M}+\text{H}]^+$  465.3046, found 465.3051.

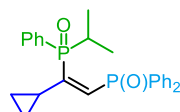

**(7z)** Colorless oil; 94% yield;  $^1\text{H NMR}$  (400 MHz,  $\text{CDCl}_3$ )  $\delta$  7.80 – 7.75 (m, 2H), 7.65 – 7.60 (m, 2H), 7.43 – 7.18 (m, 11H) (overlap one peak of 7.26), 6.20 (dd,  $J = 35.8, 17.8$  Hz, 1H), 3.51 – 3.42 (m, 1H), 2.33 – 2.16 (m, 1H), 1.14 – 1.05 (m, 6H), 0.96 – 0.86 (m, 2H), 0.54 – 0.45 (m, 2H);  $^{13}\text{C NMR}$  (101 MHz,  $\text{CDCl}_3$ )  $\delta$  159.8 (d,  $J = 74.0$  Hz), 133.1 (dd,  $J = 108.8, 8.4$  Hz), 131.4 – 130.3 (m), 129.9 (d,  $J = 9.6$  Hz), 129.5 (d,  $J = 9.9$  Hz), 127.5 (d,  $J = 12.3$  Hz), 127.3 (d,  $J = 12.4$  Hz), 127.1 (d,  $J = 11.5$  Hz), 125.8 (dd,  $J = 102.4, 9.5$  Hz), 24.6 (d,  $J = 70.4$  Hz), 16.1 (dd,  $J = 18.0, 13.3$  Hz), 14.4

(d,  $J = 2.7$  Hz), 14.2 (d,  $J = 3.2$  Hz), 10.0 (d,  $J = 2.2$  Hz), 9.5 (d,  $J = 2.4$  Hz);  $^{31}\text{P}$  NMR (162 MHz,  $\text{CDCl}_3$ )  $\delta$  40.1 (d,  $J = 15.8$  Hz), 20.1 (d,  $J = 15.7$  Hz). HRMS (ESI) calcd for  $\text{C}_{26}\text{H}_{29}\text{O}_2\text{P}_2^+ [\text{M}+\text{H}]^+$  435.1637, found 435.1635.

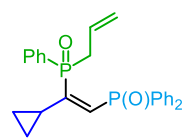

**(7aa)** White solid (m.p.: 125 - 127 °C); 51% yield;  $^1\text{H}$  NMR (400 MHz,  $\text{CDCl}_3$ )  $\delta$  7.80 (dd,  $J = 11.9, 7.2$  Hz, 2H), 7.66 - 7.61 (m, 2H), 7.52 - 7.48 (m, 1H), 7.45 - 7.26 (m, 10H) (overlap one peak of 7.26), 6.32 (dd,  $J = 37.4, 19.1$  Hz, 1H), 5.88 - 5.76 (m, 1H), 5.19 - 5.12 (m, 2H), 3.73 - 3.57 (m, 2H), 2.31 - 2.23 (m, 1H), 1.03 - 0.93 (m, 2H), 0.66 - 0.61 (m, 1H), 0.54 - 0.49 (m, 1H);  $^{13}\text{C}$  NMR (101 MHz,  $\text{CDCl}_3$ )  $\delta$  160.9 (d,  $J = 77.9$  Hz), 133.8 (d,  $J = 107.6$  Hz), 133.3 (d,  $J = 108.6$  Hz), 132.4 (d,  $J = 99.0$  Hz), 131.9 (d,  $J = 2.7$  Hz), 131.7 (d,  $J = 2.7$  Hz), 131.6 (d,  $J = 2.7$  Hz), 131.3 (d,  $J = 9.8$  Hz), 131.0 (d,  $J = 9.8$  Hz), 130.7 (d,  $J = 9.8$  Hz), 128.8 (d,  $J = 12.3$  Hz), 128.5 (d,  $J = 12.4$  Hz), 128.2 (d,  $J = 12.2$  Hz), 127.3 (d,  $J = 10.2$  Hz), 126.6 (dd,  $J = 101.8, 10.3$  Hz), 121.0 (d,  $J = 12.5$  Hz), 35.3 (d,  $J = 66.8$  Hz), 17.7 (dd,  $J = 17.9, 13.2$  Hz), 11.2 (d,  $J = 2.4$  Hz), 10.3 (d,  $J = 3.2$  Hz);  $^{31}\text{P}$  NMR (162 MHz,  $\text{CDCl}_3$ )  $\delta$  33.2 (d,  $J = 14.5$  Hz), 20.0. HRMS (ESI) calcd for  $\text{C}_{26}\text{H}_{27}\text{O}_2\text{P}_2^+ [\text{M}+\text{H}]^+$  433.1481, found 433.1480.

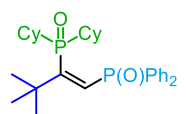

**(7ab)** White solid (m.p.: 173 - 175 °C); 80% yield;  $^1\text{H}$  NMR (400 MHz,  $\text{CDCl}_3$ )  $\delta$  7.69 - 7.63 (m, 4H), 7.54 - 7.44 (m, 6H), 6.68 (dd,  $J = 35.3, 19.6$  Hz, 1H), 2.84 - 2.76 (m, 2H), 2.03 - 2.00 (m, 2H), 1.75 - 1.71 (m, 2H), 1.55 - 1.07 (m, 23H), 0.90 - 0.78 (m, 2H);  $^{13}\text{C}$  NMR (101 MHz, Chloroform- $d$ )  $\delta$  167.2 (d,  $J = 56.7$  Hz), 133.9 (d,  $J = 106.6$  Hz), 131.9 (d,  $J = 2.6$  Hz), 130.7 (d,  $J = 9.2$  Hz), 128.9 (d,  $J = 12.0$  Hz), 126.7 (dd,  $J = 98.1, 10.4$  Hz), 42.4 (dd,  $J = 14.9, 6.3$  Hz), 39.6 (d,  $J = 63.8$  Hz), 30.3 (d,  $J = 2.1$  Hz), 27.2 (d,  $J = 3.7$  Hz), 26.7 (d,  $J = 3.7$  Hz), 26.4, 26.3, 25.9;  $^{31}\text{P}$  NMR (162 MHz, Chloroform- $d$ )  $\delta$  54.0 (d,  $J = 16.1$  Hz), 17.9 (d,  $J = 16.1$  Hz). HRMS (ESI) calcd for  $\text{C}_{30}\text{H}_{43}\text{O}_2\text{P}_2^+ [\text{M}+\text{H}]^+$  497.2733, found 497.2728.

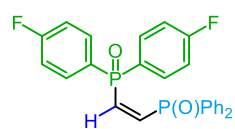

**(7ac)** White solid (m.p.: 192 - 194 °C); 63% yield;  $^1\text{H}$  NMR (400 MHz,  $\text{CDCl}_3$ )  $\delta$  7.77 - 7.71 (m, 4H), 7.58 - 7.53 (m, 4H), 7.48 - 7.44 (m, 2H), 7.38 - 7.19 (m, 6H) (overlap one peak of 7.26), 7.02 - 6.97 (m, 4H);  $^{13}\text{C}$  NMR (101 MHz,  $\text{CDCl}_3$ )  $\delta$  164.0 (dd,  $J = 254.5, 3.2$  Hz), 143.0 (d,  $J = 94.0$  Hz), 141.4 (d,  $J = 91.8$  Hz), 133.3 (dd,  $J = 11.7, 9.0$  Hz), 131.3 (d,  $J = 107.0$  Hz), 131.0 (d,  $J = 2.5$  Hz), 129.9 (d,  $J = 10.0$  Hz), 127.6 (d,  $J = 12.4$  Hz), 126.6 (d,  $J = 110.8$  Hz), 114.7 (dd,  $J = 21.5, 13.9$  Hz);  $^{31}\text{P}$  NMR (162 MHz,  $\text{CDCl}_3$ )  $\delta$  21.2 (d,  $J = 20.5$  Hz), 19.2 (d,  $J = 20.8$  Hz);  $^{19}\text{F}$  NMR (377 MHz,  $\text{CDCl}_3$ )  $\delta$  -106.5. HRMS (ESI) calcd for  $\text{C}_{26}\text{H}_{20}\text{F}_2\text{O}_2\text{P}_2\text{Na}^+ [\text{M}+\text{Na}]^+$  487.0799, found 487.0805.

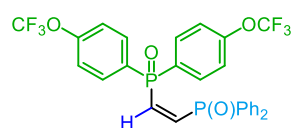

**(7ad)** White solid (m.p.: 136 - 138 °C); 50% yield;  $^1\text{H}$  NMR (400 MHz,  $\text{CDCl}_3$ )  $\delta$  7.82 (dd,  $J = 11.9, 8.7$  Hz, 4H), 7.57 - 7.46 (m, 6H), 7.44 - 7.24 (m, 6H), 7.17 (d,  $J = 7.9$  Hz, 4H);  $^{13}\text{C}$  NMR (101 MHz,  $\text{CDCl}_3$ )  $\delta$  152.1 - 152.0 (m), 143.4 (d,  $J = 94.4$  Hz), 143.0 (d,  $J = 91.0$  Hz), 133.8 (d,  $J = 11.6$  Hz), 132.2 (d,  $J = 2.6$  Hz), 132.0 (d,  $J = 107.3$  Hz), 130.9 (d,  $J = 10.0$  Hz), 130.2 (d,  $J = 109.6$  Hz), 128.7 (d,  $J = 12.5$  Hz), 120.29 (d,  $J = 13.5$  Hz), 120.28 (q,  $J = 258.9$  Hz);  $^{31}\text{P}$  NMR (162 MHz,  $\text{CDCl}_3$ )  $\delta$  21.0 (d,  $J = 21.0$  Hz), 19.2 (d,  $J = 20.0$  Hz). HRMS (ESI) calcd for  $\text{C}_{28}\text{H}_{21}\text{F}_6\text{O}_4\text{P}_2^+ [\text{M}+\text{H}]^+$  597.0814, found 597.0811.

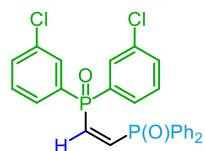

**(7ae)** White solid (m.p.: 148 - 150 °C); 74% yield;  $^1\text{H}$  NMR (400 MHz,  $\text{CDCl}_3$ )  $\delta$  7.62 - 7.50 (m, 8H), 7.43 - 7.39 (m, 2H), 7.35 - 7.06 (m, 10H);  $^{13}\text{C}$  NMR (101 MHz,  $\text{CDCl}_3$ )  $\delta$  144.5 (d,  $J = 90.4$  Hz), 141.9 (d,  $J = 94.4$  Hz), 134.9 (d,  $J = 16.4$  Hz), 134.6 (d,  $J = 105.7$  Hz), 132.3 - 131.1 (m), 130.0 (d,  $J = 13.7$  Hz), 129.4 (d,  $J = 9.8$  Hz), 128.6 (d,  $J = 12.5$  Hz);  $^{31}\text{P}$  NMR (162 MHz,  $\text{CDCl}_3$ )  $\delta$  20.0 (d,  $J = 20.9$  Hz), 18.9 (d,  $J = 20.9$  Hz). HRMS (ESI) calcd for  $\text{C}_{26}\text{H}_{21}\text{Cl}_2\text{O}_2\text{P}_2^+ [\text{M}+\text{H}]^+$  497.0388, found 497.0391.

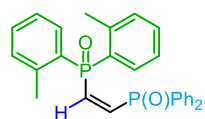

**(7af)** Oil; 80% yield;  $^1\text{H}$  NMR (400 MHz,  $\text{CDCl}_3$ )  $\delta$  7.75 - 7.70 (m, 4H), 7.43 - 7.09 (m, 16H), 2.29 (s, 6H);  $^{13}\text{C}$  NMR (101 MHz,  $\text{CDCl}_3$ )  $\delta$  144.0 (d,  $J = 92.5$  Hz), 143.0 (d,  $J = 91.1$  Hz), 141.8 (d,  $J = 8.6$  Hz), 132.7 (d,  $J = 12.3$  Hz), 132.1 (d,  $J = 2.3$  Hz), 131.9 (d,  $J = 107.4$  Hz), 131.8 (d,  $J = 2.5$  Hz), 131.7 - 131.6 (m), 130.3 (d,

$J = 104.8$  Hz), 128.2 (d,  $J = 12.6$  Hz), 125.6 (d,  $J = 13.0$  Hz), 21.7 (d,  $J = 4.3$  Hz);  $^{31}\text{P NMR}$  (162 MHz,  $\text{CDCl}_3$ )  $\delta$  24.6 (d,  $J = 20.4$  Hz), 22.0 (d,  $J = 20.4$  Hz). HRMS (ESI) calcd for  $\text{C}_{28}\text{H}_{27}\text{O}_2\text{P}_2^+$   $[\text{M}+\text{H}]^+$  457.1481, found 457.1485.

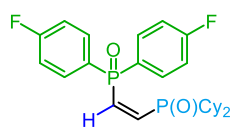

**(7ag)** White solid (m.p.: 213 – 215 °C); 80% yield;  $^1\text{H NMR}$  (400 MHz,  $\text{CDCl}_3$ )  $\delta$  7.77 – 7.71 (m, 4H), 7.17 – 6.99 (m, 5H), 6.84 – 6.67 (m, 1H), 2.23 – 2.15 (m, 2H), 1.86 – 1.83 (m, 2H), 1.74 – 1.72 (m, 2H), 1.67 – 1.58 (m, 6H), 1.41 – 1.30 (m, 3H), 1.25 – 1.00 (m, 7H);  $^{13}\text{C NMR}$  (101 MHz,  $\text{CDCl}_3$ )  $\delta$  165.1 (dd,  $J = 255.1$ , 3.2 Hz), 145.3 (d,  $J = 72.7$  Hz), 140.6 (d,  $J = 96.3$  Hz), 133.8 (dd,  $J = 11.4$ , 8.9 Hz), 128.5 (dd,  $J = 110.2$ , 3.0 Hz), 116.1 (dd,  $J = 21.5$ , 13.6 Hz), 37.4 (d,  $J = 66.8$  Hz), 26.3 – 26.1 (m), 25.7, 25.5 (d,  $J = 3.2$  Hz);  $^{31}\text{P NMR}$  (162 MHz,  $\text{CDCl}_3$ )  $\delta$  47.5 (d,  $J = 16.3$  Hz), 19.1 (d,  $J = 17.2$  Hz);  $^{19}\text{F NMR}$  (377 MHz,  $\text{CDCl}_3$ )  $\delta$  -106.0. HRMS (ESI) calcd for  $\text{C}_{26}\text{H}_{33}\text{F}_2\text{O}_2\text{P}_2^+$   $[\text{M}+\text{H}]^+$  477.1918, found 477.1921.

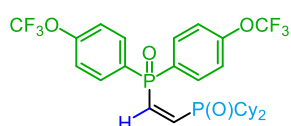

**(7ah)** White solid (m.p.: 156 - 158 °C); 65% yield;  $^1\text{H NMR}$  (400 MHz,  $\text{CDCl}_3$ )  $\delta$  7.85 (dd,  $J = 11.5$ , 8.6 Hz, 4H), 7.29 (d,  $J = 8.0$  Hz, 4H), 7.22 – 7.08 (m, 1H), 6.88 – 6.70 (m, 1H), 2.06 – 2.01 (m, 2H), 1.82 – 1.61 (m, 10H), 1.32 – 1.02 (m, 10H);  $^{13}\text{C NMR}$  (101 MHz,  $\text{CDCl}_3$ )  $\delta$  152.0, 145.0 (d,  $J = 72.9$  Hz), 141.5 (d,  $J = 96.7$  Hz), 133.5 (d,  $J = 11.2$  Hz), 131.1 (d,  $J = 108.9$  Hz), 120.6 (d,  $J = 13.3$  Hz), 120.3 (q,  $J = 259.9$  Hz), 37.0 (d,  $J = 67.2$  Hz), 26.3 – 26.1 (m), 25.7, 25.3 (d,  $J = 3.0$  Hz);  $^{31}\text{P NMR}$  (162 MHz,  $\text{CDCl}_3$ )  $\delta$  46.3 (d,  $J = 17.0$  Hz), 18.8 (d,  $J = 17.5$  Hz);  $^{19}\text{F NMR}$  (377 MHz,  $\text{CDCl}_3$ )  $\delta$  -57.7. HRMS (ESI) calcd for  $\text{C}_{28}\text{H}_{33}\text{F}_6\text{O}_4\text{P}_2^+$   $[\text{M}+\text{H}]^+$  609.1753, found 609.1745.

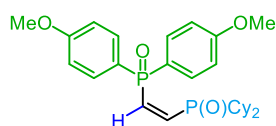

**(7ai)** White solid (m.p.: 121 - 123 °C); 60% yield;  $^1\text{H NMR}$  (400 MHz,  $\text{CDCl}_3$ )  $\delta$  7.58 (dd,  $J = 11.6$ , 8.7 Hz, 4H), 7.03 – 6.84 (m, 5H), 6.77 – 6.61 (m, 1H), 3.79 (s, 6H), 2.55 – 2.47 (m, 2H), 1.95 – 1.92 (m, 2H), 1.74 – 1.32 (m, 13H), 1.17 – 1.00 (m, 5H);  $^{13}\text{C NMR}$  (101 MHz,  $\text{CDCl}_3$ )  $\delta$  162.6 (d,  $J = 2.8$  Hz), 145.5 (d,  $J = 73.5$  Hz), 139.5 (d,  $J = 95.4$  Hz), 132.9 (d,  $J = 11.2$  Hz), 123.9 (d,  $J = 112.9$  Hz), 114.3 (d,  $J = 13.3$  Hz), 55.4, 38.0 (d,  $J = 66.2$  Hz), 26.5 (d,  $J = 3.5$  Hz), 26.3 (d,  $J = 5.1$  Hz), 26.2 (d,  $J = 4.8$  Hz), 25.9 (d,  $J = 3.5$  Hz), 25.8;  $^{31}\text{P NMR}$  (162 MHz,  $\text{CDCl}_3$ )  $\delta$  49.4 (d,  $J = 16.4$  Hz), 19.5 (d,  $J = 16.7$  Hz). HRMS (ESI) calcd for  $\text{C}_{28}\text{H}_{39}\text{O}_4\text{P}_2^+$   $[\text{M}+\text{H}]^+$  501.2319, found 501.2310.

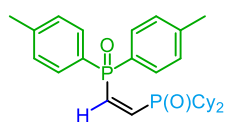

**(7aj)** White solid (m.p.: 107 - 109 °C); 72% yield;  $^1\text{H NMR}$  (400 MHz,  $\text{CDCl}_3$ )  $\delta$  7.55 (dd,  $J = 11.9$ , 8.0 Hz, 4H), 7.26 – 7.24 (m, 4H), 7.07 – 6.68 (m, 2H), 2.58 – 2.50 (m, 2H), 2.36 (s, 6H), 1.97 – 1.94 (m, 2H), 1.75 – 1.58 (m, 8H), 1.51 – 1.36 (m, 4H), 1.21 – 1.00 (m, 6H);  $^{13}\text{C NMR}$  (101 MHz,  $\text{CDCl}_3$ )  $\delta$  146.0 (d,  $J = 73.2$  Hz), 142.7 (d,  $J = 2.7$  Hz), 139.1 (d,  $J = 94.6$  Hz), 131.0 (d,  $J = 10.2$  Hz), 129.5 (d,  $J = 12.7$  Hz), 129.3 (d,  $J = 108.7$  Hz), 37.9 (d,  $J = 66.0$  Hz), 26.4 (d,  $J = 3.5$  Hz), 26.3, 26.2, 25.9 (d,  $J = 3.5$  Hz), 25.8, 21.6;  $^{31}\text{P NMR}$  (162 MHz,  $\text{CDCl}_3$ )  $\delta$  50.2, 19.9 (d,  $J = 15.7$  Hz). HRMS (ESI) calcd for  $\text{C}_{28}\text{H}_{39}\text{O}_2\text{P}_2^+$   $[\text{M}+\text{H}]^+$  469.2420, found 469.2415.

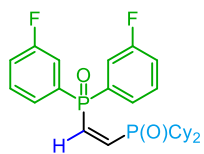

**(7ak)** White solid (m.p.: 152 - 154 °C); 78% yield;  $^1\text{H NMR}$  (400 MHz,  $\text{CDCl}_3$ )  $\delta$  7.53 – 7.41 (m, 6H), 7.21 – 7.03 (m, 3H), 6.93 – 6.75 (m, 1H), 2.21 – 2.13 (m, 2H), 1.88 – 1.58 (m, 10H), 1.42 – 1.02 (m, 10H);  $^{13}\text{C NMR}$  (101 MHz,  $\text{CDCl}_3$ )  $\delta$  162.5 (dd,  $J = 251.7$ , 17.4 Hz), 146.3 (d,  $J = 72.2$  Hz), 139.9 (d,  $J = 96.7$  Hz), 135.2 (d,  $J = 106.2$  Hz), 130.8 (dd,  $J = 14.4$ , 7.4 Hz), 126.8 (dd,  $J = 9.3$ , 2.9 Hz), 119.4 (d,  $J = 20.6$  Hz), 118.0 (dd,  $J = 22.7$ , 10.8 Hz), 37.2 (d,  $J = 66.9$  Hz), 26.3 – 26.1 (m), 25.7, 25.4 (d,  $J = 3.2$  Hz);  $^{31}\text{P NMR}$  (162 MHz,  $\text{CDCl}_3$ )  $\delta$  47.6 (d,  $J = 16.1$  Hz), 17.7 (d,  $J = 17.1$  Hz);  $^{19}\text{F NMR}$  (377 MHz,  $\text{CDCl}_3$ )  $\delta$  -110.5 (d,  $J = 5.1$  Hz). HRMS (ESI) calcd for  $\text{C}_{26}\text{H}_{32}\text{F}_2\text{O}_2\text{P}_2\text{Na}^+$   $[\text{M}+\text{Na}]^+$  499.1738, found 499.1739.



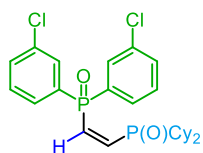

**(7al)** White solid (m.p.: 106 - 108 °C); 70% yield;  $^1\text{H NMR}$  (400 MHz,  $\text{CDCl}_3$ )  $\delta$  7.76 (d,  $J$  = 12.5 Hz, 2H), 7.62 (dd,  $J$  = 11.4, 7.6 Hz, 2H), 7.48 – 7.46 (m, 2H), 7.42 – 7.37 (m, 2H), 7.25 – 7.07 (m, 1H), 6.94 – 6.76 (m, 1H), 2.13 – 2.04 (m, 2H), 1.86 – 1.63 (m, 10H), 1.39 – 1.29 (m, 4H), 1.20 – 1.06 (m, 6H);  $^{13}\text{C NMR}$  (101 MHz,  $\text{CDCl}_3$ )  $\delta$  145.7 (d,  $J$  = 71.9 Hz), 140.9 (d,  $J$  = 96.3 Hz), 135.1 (d,  $J$  = 16.3 Hz), 134.9 (d,  $J$  = 106.0 Hz), 132.3, 131.0 (d,  $J$  = 11.0 Hz), 130.2 (d,  $J$  = 13.5 Hz), 129.2 (d,  $J$  = 9.4 Hz), 36.9 (d,  $J$  = 67.2 Hz), 26.4 – 26.2 (m), 25.7, 25.4 (d,  $J$  = 3.0 Hz);  $^{31}\text{P NMR}$  (162 MHz,  $\text{CDCl}_3$ )  $\delta$  47.1 (d,  $J$  = 14.2 Hz), 18.3 (d,  $J$  = 17.3 Hz). HRMS (ESI) calcd for  $\text{C}_{26}\text{H}_{33}\text{Cl}_2\text{O}_2\text{P}_2^+$   $[\text{M}+\text{H}]^+$  509.1327, found 509.1330.

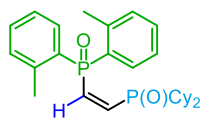

**(7am)** White solid (m.p.: 75 - 77 °C); 90% yield;  $^1\text{H NMR}$  (400 MHz,  $\text{CDCl}_3$ )  $\delta$  7.53 (dd,  $J$  = 13.8, 7.6 Hz, 2H), 7.39 (t,  $J$  = 7.4 Hz, 2H), 7.24 – 7.19 (m, 4H), 7.06 – 6.78 (m, 2H), 2.58 – 2.51 (m, 2H), 2.31 (s, 6H), 1.97 – 1.94 (m, 2H), 1.70 – 1.68 (m, 4H), 1.57 – 1.37 (m, 8H), 1.17 – 1.05 (m, 4H), 0.95 – 0.89 (m, 2H);  $^{13}\text{C NMR}$  (101 MHz,  $\text{CDCl}_3$ )  $\delta$  148.1 (d,  $J$  = 72.8 Hz), 141.5 (d,  $J$  = 8.9 Hz), 138.9 (d,  $J$  = 93.9 Hz), 132.3 (d,  $J$  = 2.5 Hz), 132.2 (d,  $J$  = 11.5 Hz), 132.0 (d,  $J$  = 10.9 Hz), 130.7 (d,  $J$  = 103.4 Hz), 125.9 (d,  $J$  = 12.5 Hz), 38.0 (d,  $J$  = 66.0 Hz), 26.4 – 25.9 (m), 25.7, 21.4 (d,  $J$  = 4.4 Hz);  $^{31}\text{P NMR}$  (162 MHz,  $\text{CDCl}_3$ )  $\delta$  50.5, 23.8 (d,  $J$  = 16.3 Hz). HRMS (ESI) calcd for  $\text{C}_{28}\text{H}_{38}\text{NaO}_2\text{P}_2^+$   $[\text{M}+\text{Na}]^+$  491.2240, found 491.2245.

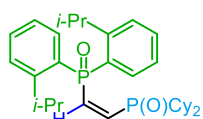

**(7an)** White solid (m.p.: 181 - 183 °C); 87% yield;  $^1\text{H NMR}$  (400 MHz,  $\text{CDCl}_3$ )  $\delta$  7.48 – 7.38 (m, 6H), 7.20 – 7.16 (m, 2H), 7.06 – 6.80 (m, 2H), 3.54 – 3.46 (m, 2H), 2.64 – 2.55 (m, 2H), 1.98 – 1.95 (m, 2H), 1.67 – 1.42 (m, 12H), 1.22 – 1.01 (m, 16H), 0.83 – 0.74 (m, 2H);  $^{13}\text{C NMR}$  (101 MHz,  $\text{CDCl}_3$ )  $\delta$  153.3 (d,  $J$  = 9.2 Hz), 148.3 (d,  $J$  = 68.3 Hz), 139.9 (d,  $J$  = 92.3 Hz), 132.6, 132.1 (d,  $J$  = 12.4 Hz), 130.4 (d,  $J$  = 104.3 Hz), 127.4 (d,  $J$  = 10.7 Hz), 125.8 (d,  $J$  = 12.7 Hz), 37.8 (d,  $J$  = 65.8 Hz), 31.4 (d,  $J$  = 4.7 Hz), 26.4 – 25.7 (m), 24.2, 24.0;  $^{31}\text{P NMR}$  (162 MHz,  $\text{CDCl}_3$ )  $\delta$  50.8, 24.6. HRMS (ESI) calcd for  $\text{C}_{32}\text{H}_{47}\text{O}_2\text{P}_2^+$   $[\text{M}+\text{H}]^+$  525.3046, found 525.3038.

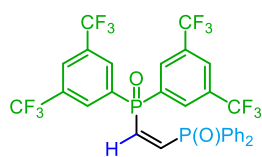

**(7ao)** White solid (m.p.: 166 - 168 °C); 41% yield;  $^1\text{H NMR}$  (400 MHz,  $\text{CDCl}_3$ )  $\delta$  8.36 (d,  $J$  = 12.1 Hz, 4H), 7.97 (s, 2H), 7.53 – 7.23 (m, 12H) (overlap one peak of 7.26);  $^{13}\text{C NMR}$  (101 MHz,  $\text{CDCl}_3$ )  $\delta$  146.0 (d,  $J$  = 87.0 Hz), 141.3 (d,  $J$  = 96.9 Hz), 135.2 (d,  $J$  = 107.8 Hz), 132.7 (d,  $J$  = 2.6 Hz), 132.5 – 131.4 (m), 130.8 (d,  $J$  = 10.0 Hz), 130.6 (d,  $J$  = 106.1 Hz), 129.0 (d,  $J$  = 12.4 Hz), 126.2 – 126.0 (m), 122.7 (q,  $J$  = 274.2 Hz);  $^{31}\text{P NMR}$  (162 MHz,  $\text{CDCl}_3$ )  $\delta$  20.7 (d,  $J$  = 21.3 Hz), 20.1 (d,  $J$  = 21.1 Hz);  $^{19}\text{F NMR}$  (377 MHz,  $\text{CDCl}_3$ )  $\delta$  -62.9. HRMS (ESI) calcd for  $\text{C}_{30}\text{H}_{19}\text{F}_{12}\text{O}_2\text{P}_2^+$   $[\text{M}+\text{H}]^+$  701.0664, found 701.0669.

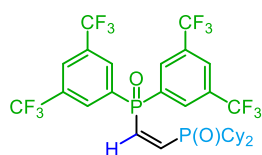

**(7ap)** White solid (m.p.: 192 - 194 °C); 39% yield;  $^1\text{H NMR}$  (400 MHz,  $\text{CDCl}_3$ )  $\delta$  8.32 (d,  $J$  = 12.0 Hz, 4H), 8.01 (s, 2H), 7.40 – 7.23 (m, 1H), 7.11 – 6.90 (m, 1H), 1.76 – 1.64 (m, 12H), 1.21 – 1.14 (m, 10H);  $^{13}\text{C NMR}$  (101 MHz,  $\text{CDCl}_3$ )  $\delta$  145.1 (d,  $J$  = 70.8 Hz), 141.7 (d,  $J$  = 99.3 Hz), 135.8 (d,  $J$  = 108.3 Hz), 131.0 (qd,  $J$  = 34.1, 12.8 Hz), 130.4 – 130.2 (m), 124.9 – 124.7 (m), 121.8 (q,  $J$  = 273.1 Hz), 34.9 (d,  $J$  = 67.6 Hz), 25.3 – 25.0 (m), 24.6, 23.9 (d,  $J$  = 3.2 Hz);  $^{31}\text{P NMR}$  (162 MHz,  $\text{CDCl}_3$ )  $\delta$  44.7 (d,  $J$  = 17.9 Hz), 17.7 (d,  $J$  = 18.1 Hz);  $^{19}\text{F NMR}$  (377 MHz,  $\text{CDCl}_3$ )  $\delta$  -62.9. HRMS (ESI) calcd for  $\text{C}_{30}\text{H}_{31}\text{F}_{12}\text{O}_2\text{P}_2^+$   $[\text{M}+\text{H}]^+$  713.1602, found 713.1603.

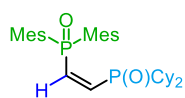

**(7aq)** White solid (m.p.: 177 - 179 °C); 63% yield;  $^1\text{H NMR}$  (400 MHz,  $\text{CDCl}_3$ )  $\delta$  7.16 – 6.97 (m, 1H), 6.77 (d,  $J$  = 3.6 Hz, 4H), 6.56 (ddd,  $J$  = 42.6, 16.3, 7.3 Hz, 1H), 2.46 – 2.31 (m, 14H), 2.19 (s, 6H), 1.93 – 1.91 (m, 2H), 1.68 – 1.39 (m, 12H), 1.21 – 1.00 (m, 6H);  $^{13}\text{C NMR}$  (101 MHz,  $\text{CDCl}_3$ )  $\delta$  144.6 – 141.4 (m), 131.2 (d,  $J$  = 11.4 Hz), 129.2 (d,  $J$  = 100.8 Hz), 38.1 (d,  $J$  = 66.4 Hz), 26.3 – 25.8 (m), 23.0 (d,  $J$  = 4.5 Hz), 20.9 (d,  $J$  = 0.9 Hz);  $^{31}\text{P NMR}$  (162 MHz,  $\text{CDCl}_3$ )  $\delta$  48.7, 24.0 (d,  $J$  = 11.9 Hz). HRMS (ESI) calcd for  $\text{C}_{32}\text{H}_{47}\text{O}_2\text{P}_2^+$   $[\text{M}+\text{H}]^+$  525.3046, found 525.3043.

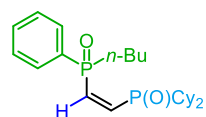

**(7ar)** Colorless oil; 52% yield;  $^1\text{H NMR}$  (400 MHz,  $\text{CDCl}_3$ )  $\delta$  7.83 (dd,  $J = 11.1, 7.7$  Hz, 2H), 7.42 – 7.35 (m, 3H), 7.05 – 6.89 (m, 1H), 6.44 – 6.26 (m, 1H), 2.53 – 2.46 (m, 2H), 1.94 – 1.87 (m, 2H), 1.73 – 1.63 (m, 7H), 1.53 – 1.31 (m, 9H), 1.16 – 0.99 (m, 8H), 0.80 (t,  $J = 7.2$  Hz, 3H);  $^{13}\text{C NMR}$  (101 MHz,  $\text{CDCl}_3$ )  $\delta$  146.4 (d,  $J = 86.4$  Hz), 139.2 (d,  $J = 75.7$  Hz), 132.9 (d,  $J = 100.4$  Hz), 131.6, 131.2 (d,  $J = 9.6$  Hz), 128.3 (d,  $J = 11.9$  Hz), 36.2 (dd,  $J = 67.9, 13.7$  Hz), 29.8 (d,  $J = 71.9$  Hz), 26.4 – 25.6 (m), 25.0 (d,  $J = 3.2$  Hz), 24.8 (d,  $J = 3.2$  Hz), 24.0 (d,  $J = 16.1$  Hz), 23.5 (d,  $J = 4.4$  Hz), 13.7;  $^{31}\text{P NMR}$  (162 MHz,  $\text{CDCl}_3$ )  $\delta$  45.5 (d,  $J = 13.3$  Hz), 31.2 (d,  $J = 15.8$  Hz). HRMS (ESI) calcd for  $\text{C}_{24}\text{H}_{39}\text{O}_2\text{P}_2^+$   $[\text{M}+\text{H}]^+$  421.2420, found 421.2423.

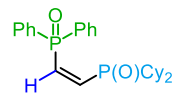

**(7as)** White solid (m.p.: 188 - 190 °C); 90% yield;  $^1\text{H NMR}$  (400 MHz,  $\text{CDCl}_3$ )  $\delta$  7.69 (dd,  $J = 12.1, 7.1$  Hz, 4H), 7.51 (t,  $J = 7.6$  Hz, 2H), 7.45 (td,  $J = 7.7, 2.8$  Hz, 4H), 7.13 – 6.72 (m, 2H), 2.52 – 2.44 (m, 2H), 1.96 – 1.92 (m, 2H), 1.75 – 1.71 (m, 2H), 1.67 – 1.56 (m, 6H), 1.52 – 1.31 (m, 4H), 1.29 – 0.96 (m, 6H);  $^{13}\text{C NMR}$  (101 MHz,  $\text{CDCl}_3$ )  $\delta$  146.7 (d,  $J = 72.6$  Hz), 138.9 (d,  $J = 94.6$  Hz), 132.5 (d,  $J = 106.2$  Hz), 132.2 (d,  $J = 2.6$  Hz), 131.0 (d,  $J = 9.7$  Hz), 128.8 (d,  $J = 12.2$  Hz), 37.9 (d,  $J = 66.2$  Hz), 26.4 (d,  $J = 3.5$  Hz), 26.2 (d,  $J = 13.3$  Hz), 25.82 – 25.77 (m);  $^{31}\text{P NMR}$  (162 MHz,  $\text{CDCl}_3$ )  $\delta$  49.6, 19.5 (d,  $J = 16.5$  Hz). HRMS (ESI) calcd for  $\text{C}_{26}\text{H}_{35}\text{O}_2\text{P}_2^+$   $[\text{M}+\text{H}]^+$  441.2107, found 441.2107.

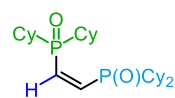

**(7at)** White solid (m.p.: 199 - 201 °C); 80% yield;  $^1\text{H NMR}$  (400 MHz,  $\text{CDCl}_3$ )  $\delta$  6.63 – 6.50 (m, 2H), 2.22 – 2.12 (m, 4H), 1.97 – 1.94 (m, 4H), 1.80 – 1.72 (m, 12H), 1.67 – 1.62 (m, 4H), 1.46 – 1.36 (m, 8H), 1.28 – 1.15 (m, 12H);  $^{13}\text{C NMR}$  (101 MHz,  $\text{CDCl}_3$ )  $\delta$  143.4 (d,  $J = 77.9$  Hz), 37.5 (d,  $J = 68.2$  Hz), 26.4 – 26.2 (m), 25.8, 25.7;  $^{31}\text{P NMR}$  (162 MHz,  $\text{CDCl}_3$ )  $\delta$  46.3. HRMS (ESI) calcd for  $\text{C}_{26}\text{H}_{47}\text{O}_2\text{P}_2^+$   $[\text{M}+\text{H}]^+$  453.3046, found 453.3044.

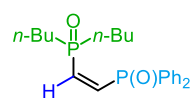

**(7au)** Colorless oil; 60% yield;  $^1\text{H NMR}$  (400 MHz,  $\text{CDCl}_3$ )  $\delta$  7.65 (dd,  $J = 12.0, 7.2$  Hz, 4H), 7.52 (t,  $J = 7.6$  Hz, 2H), 7.46 (td,  $J = 7.6, 2.8$  Hz, 4H), 7.02 – 6.88 (m, 2H), 2.42 – 2.31 (m, 2H), 2.18 – 2.07 (m, 2H), 1.67 – 1.54 (m, 2H), 1.46 – 1.34 (m, 2H), 1.33 – 1.15 (m, 4H), 0.76 (t,  $J = 7.3$  Hz, 6H);  $^{13}\text{C NMR}$  (101 MHz,  $\text{CDCl}_3$ )  $\delta$  148.2 (d,  $J = 77.2$  Hz), 138.0 (d,  $J = 94.1$  Hz), 132.33 (d,  $J = 2.6$  Hz), 132.32 (d,  $J = 106.2$  Hz), 130.9 (d,  $J = 9.9$  Hz), 128.9 (d,  $J = 12.1$  Hz), 30.3 (d,  $J = 68.0$  Hz), 24.1 (d,  $J = 15.4$  Hz), 23.8 (d,  $J = 4.8$  Hz), 13.6;  $^{31}\text{P NMR}$  (162 MHz,  $\text{CDCl}_3$ )  $\delta$  44.4 (d,  $J = 18.4$  Hz), 19.7 (d,  $J = 18.8$  Hz). HRMS (ESI) calcd for  $\text{C}_{22}\text{H}_{31}\text{O}_2\text{P}_2^+$   $[\text{M}+\text{H}]^+$  389.1794, found 389.1791.

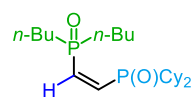

**(7av)** White solid (m.p.: 53 - 55 °C); 85% yield;  $^1\text{H NMR}$  (400 MHz,  $\text{CDCl}_3$ )  $\delta$  6.98 – 6.83 (m, 1H), 6.37 – 6.18 (m, 1H), 2.28 – 2.08 (m, 4H), 1.91 – 1.88 (m, 2H), 1.79 – 1.58 (m, 12H), 1.52 – 1.43 (m, 2H), 1.39 – 1.15 (m, 14H), 0.84 (t,  $J = 7.2$  Hz, 6H);  $^{13}\text{C NMR}$  (101 MHz,  $\text{CDCl}_3$ )  $\delta$  149.7 (d,  $J = 77.4$  Hz), 136.8 (dd,  $J = 74.8, 3.3$  Hz), 35.6 (d,  $J = 67.1$  Hz), 30.2 (d,  $J = 66.5$  Hz), 26.4 – 26.0 (m), 25.7, 24.7, 24.1 (d,  $J = 15.5$  Hz), 23.7 (d,  $J = 4.3$  Hz), 13.6;  $^{31}\text{P NMR}$  (162 MHz,  $\text{CDCl}_3$ )  $\delta$  44.2 (d,  $J = 16.7$  Hz), 43.8 (d,  $J = 14.1$  Hz). HRMS (ESI) calcd for  $\text{C}_{22}\text{H}_{43}\text{O}_2\text{P}_2^+$   $[\text{M}+\text{H}]^+$  401.2733, found 401.2730.

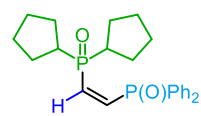

**(7aw)** White solid (m.p.: 175 - 177 °C); 83% yield;  $^1\text{H NMR}$  (400 MHz,  $\text{CDCl}_3$ )  $\delta$  7.67 – 7.62 (m, 4H), 7.54 – 7.50 (m, 2H), 7.48 – 7.43 (m, 4H), 7.15 – 6.83 (m, 2H), 3.04 – 2.95 (m, 2H), 1.92 – 1.83 (m, 4H), 1.74 – 1.62 (m, 4H), 1.60 – 1.47 (m, 6H), 1.42 – 1.34 (m, 2H);  $^{13}\text{C NMR}$  (101 MHz,  $\text{CDCl}_3$ )  $\delta$  149.0 (d,  $J = 76.0$  Hz), 136.9 (d,  $J = 94.8$  Hz), 132.3 (d,  $J = 2.5$  Hz), 132.3 (d,  $J = 106.3$  Hz), 130.9 (d,  $J = 9.8$  Hz), 128.9 (d,  $J = 12.3$  Hz), 38.6 (d,  $J = 69.7$  Hz), 27.5 (d,  $J = 1.9$  Hz), 26.8 (d,  $J = 10.1$  Hz), 26.2 (d,  $J = 0.9$  Hz), 26.0 (d,  $J = 10.4$  Hz);  $^{31}\text{P NMR}$  (162 MHz,  $\text{CDCl}_3$ )  $\delta$  48.8, 20.0 (d,  $J = 18.1$  Hz). HRMS (ESI) calcd for  $\text{C}_{24}\text{H}_{31}\text{O}_2\text{P}_2^+$   $[\text{M}+\text{H}]^+$  413.1794, found 413.1794.

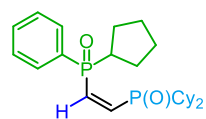

**(7ax)** White solid (m.p.: 77 - 79 °C); 82% yield;  $^1\text{H NMR}$  (400 MHz,  $\text{CDCl}_3$ )  $\delta$  7.86 – 7.81 (m, 2H), 7.48 – 7.40 (m, 3H), 6.97 (dt,  $J = 36.2, 14.8$  Hz, 1H), 6.46 (dt,  $J = 39.3, 15.3$  Hz, 1H), 3.16 – 3.09 (m, 1H), 2.62 (s, 1H), 2.19 – 2.10 (m, 1H), 2.02 – 1.86 (m, 4H), 1.82 – 1.77 (m, 3H), 1.74 – 1.52 (m, 10H), 1.48 – 1.32 (m, 4H), 1.24 – 1.19 (m, 2H), 1.15 – 0.84 (m, 5H);  $^{13}\text{C NMR}$  (101 MHz,  $\text{CDCl}_3$ )  $\delta$  144.2 (d,  $J = 86.0$  Hz), 141.5 (d,  $J = 75.5$  Hz), 132.8 (d,

$J = 97.4$  Hz), 131.6 (d,  $J = 2.1$  Hz), 131.3 (d,  $J = 9.2$  Hz), 128.3 (d,  $J = 11.6$  Hz), 37.8 – 36.4 (m), 27.0 (d,  $J = 8.7$  Hz), 26.6 (d,  $J = 8.7$  Hz), 26.5 – 26.1 (m), 25.9 (d,  $J = 3.1$  Hz), 25.8, 25.7, 25.4 (d,  $J = 3.1$  Hz), 25.1 (d,  $J = 3.3$  Hz);  $^{31}\text{P}$  NMR (162 MHz,  $\text{CDCl}_3$ )  $\delta$  46.9 (d,  $J = 14.0$  Hz), 33.5 (d,  $J = 13.7$  Hz). HRMS (ESI) calcd for  $\text{C}_{25}\text{H}_{39}\text{O}_2\text{P}_2^+$   $[\text{M}+\text{H}]^+$  433.2420, found 433.2419.

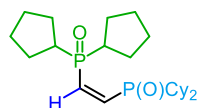

**(7ay)** White solid (m.p.: 160 - 162 °C); 70% yield;  $^1\text{H}$  NMR (400 MHz,  $\text{CDCl}_3$ )  $\delta$  6.95 – 6.81 (m, 1H), 6.35 – 6.16 (m, 1H), 2.83 – 2.73 (m, 2H), 1.87 – 1.27 (m, 32H), 1.21 – 1.12 (m, 6H);  $^{13}\text{C}$  NMR (101 MHz,  $\text{CDCl}_3$ )  $\delta$  149.7 (d,  $J = 77.4$  Hz), 136.9 (d,  $J = 77.3$  Hz), 38.8 (d,  $J = 69.8$  Hz), 36.4 (d,  $J = 68.2$  Hz), 27.6 (d,  $J = 2.2$  Hz), 26.5 – 25.9 (m), 25.7 (d,  $J = 0.9$  Hz), 25.0 (d,  $J = 3.2$  Hz);  $^{31}\text{P}$  NMR (162 MHz,  $\text{CDCl}_3$ )  $\delta$  46.9, 44.5. HRMS (ESI) calcd for  $\text{C}_{24}\text{H}_{43}\text{O}_2\text{P}_2^+$   $[\text{M}+\text{H}]^+$  425.2733, found 425.2740.

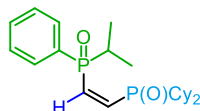

**(7az)** White solid (m.p.: 114 - 116 °C); 70% yield;  $^1\text{H}$  NMR (400 MHz,  $\text{CDCl}_3$ )  $\delta$  7.77 – 7.72 (m, 2H), 7.44 – 7.36 (m, 3H), 7.00 – 6.82 (m, 1H), 6.63 – 6.45 (m, 1H), 2.76 – 2.67 (m, 1H), 2.22 – 2.14 (m, 1H), 2.08 – 2.00 (m, 1H), 1.93 – 1.88 (m, 1H), 1.73 – 1.59 (m, 6H), 1.49 – 1.14 (m, 12H), 1.07 – 0.77 (m, 7H);  $^{13}\text{C}$  NMR (101 MHz,  $\text{CDCl}_3$ )  $\delta$  143.4 (d,  $J = 74.7$  Hz), 142.2 (d,  $J = 85.0$  Hz), 131.7 (d,  $J = 2.5$  Hz), 131.3 (d,  $J = 95.9$  Hz), 131.2 (d,  $J = 8.8$  Hz), 128.4 (d,  $J = 11.5$  Hz), 37.5 (d,  $J = 67.1$  Hz), 36.7 (d,  $J = 67.0$  Hz), 28.1 (d,  $J = 73.3$  Hz), 26.4 – 25.3 (m), 15.3 (d,  $J = 3.1$  Hz), 14.9 (d,  $J = 2.4$  Hz);  $^{31}\text{P}$  NMR (162 MHz,  $\text{CDCl}_3$ )  $\delta$  47.9, 35.3 (d,  $J = 11.8$  Hz). HRMS (ESI) calcd for  $\text{C}_{23}\text{H}_{37}\text{O}_2\text{P}_2^+$   $[\text{M}+\text{H}]^+$  407.2263, found 407.2257.

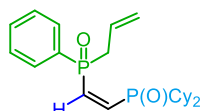

**(7ba)** White solid (m.p.: 74 - 76 °C); 37% yield;  $^1\text{H}$  NMR (400 MHz,  $\text{CDCl}_3$ )  $\delta$  7.90 – 7.85 (m, 2H), 7.47 – 7.39 (m, 3H), 7.14 – 6.97 (m, 1H), 6.54 – 6.35 (m, 1H), 5.80 – 5.68 (m, 1H), 5.19 – 5.11 (m, 2H), 3.63 – 3.54 (m, 1H), 3.40 – 3.30 (m, 1H), 1.96 – 1.90 (m, 2H), 1.81 – 1.24 (m, 14H), 1.16 – 1.01 (m, 6H);  $^{13}\text{C}$  NMR (101 MHz,  $\text{CDCl}_3$ )  $\delta$  145.9 (d,  $J = 87.8$  Hz), 139.6 (d,  $J = 75.2$  Hz), 132.3 (d,  $J = 104.4$  Hz) (overlap one peak of 131.8), 131.8, 131.3 (d,  $J = 9.5$  Hz), 128.3 (d,  $J = 12.1$  Hz), 127.0 (d,  $J = 10.1$  Hz), 121.1 (d,  $J = 12.6$  Hz), 36.5 (d,  $J = 68.6$  Hz), 36.21 (d,  $J = 67.9$  Hz), 36.18 (d,  $J = 68.3$  Hz), 26.4 – 25.7 (m), 25.1 (d,  $J = 3.2$  Hz), 24.8 (d,  $J = 3.2$  Hz);  $^{31}\text{P}$  NMR (162 MHz,  $\text{CDCl}_3$ )  $\delta$  45.9, 27.6 (d,  $J = 14.5$  Hz). HRMS (ESI) calcd for  $\text{C}_{23}\text{H}_{35}\text{O}_2\text{P}_2^+$   $[\text{M}+\text{H}]^+$  405.2107, found 405.2109.

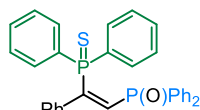

**(8a)** White solid (m.p.: 176 - 178 °C); 70% yield;  $^1\text{H}$  NMR (400 MHz,  $\text{CDCl}_3$ )  $\delta$  7.85 (dd,  $J = 13.7, 7.5$  Hz, 4H), 7.58 (dd,  $J = 12.0, 7.3$  Hz, 4H), 7.46 (t,  $J = 7.5$  Hz, 2H), 7.39 (td,  $J = 7.6, 2.8$  Hz, 4H), 7.31 – 7.09 (m, 11H) (overlap one peak of 7.26), 6.97 (dd,  $J = 38.0, 19.3$  Hz, 1H);  $^{13}\text{C}$  NMR (101 MHz,  $\text{CDCl}_3$ )  $\delta$  157.3 (d,  $J = 66.8$  Hz), 141.7 (dd,  $J = 16.2, 10.4$  Hz), 137.2 (dd,  $J = 92.5, 8.8$  Hz), 133.6 (d,  $J = 107.8$  Hz), 132.6 (d,  $J = 86.2$  Hz), 132.4 (d,  $J = 10.8$  Hz), 131.7 (d,  $J = 2.6$  Hz), 131.0 – 130.9 (m), 128.6 (d,  $J = 12.3$  Hz), 128.1, 128.0 (d,  $J = 3.7$  Hz), 127.9 – 127.7 (m);  $^{31}\text{P}$  NMR (162 MHz,  $\text{CDCl}_3$ )  $\delta$  40.5 (d,  $J = 13.0$  Hz), 16.2 (d,  $J = 13.6$  Hz). HRMS (ESI) calcd for  $\text{C}_{32}\text{H}_{27}\text{OP}_2\text{S}^+$   $[\text{M}+\text{H}]^+$  521.1252, found 521.1252.

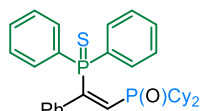

**(8b)** White solid (m.p.: 242 - 243 °C); 83% yield;  $^1\text{H}$  NMR (400 MHz,  $\text{CDCl}_3$ )  $\delta$  7.88 (dd,  $J = 13.4, 7.4$  Hz, 4H), 7.35 – 7.29 (m, 6H), 7.12 (s, 5H), 6.40 (dd,  $J = 39.2, 19.2$  Hz, 1H), 1.87 – 1.69 (m, 12H), 1.47 – 1.35 (m, 4H), 1.27 – 1.14 (m, 6H);  $^{13}\text{C}$  NMR (101 MHz,  $\text{CDCl}_3$ )  $\delta$  158.3 (d,  $J = 68.0$  Hz), 142.3 (dd,  $J = 14.1, 10.8$  Hz), 137.8 (dd,  $J = 73.9, 10.3$  Hz), 133.6 (d,  $J = 86.1$  Hz), 132.2 (d,  $J = 10.4$  Hz), 130.9 (d,  $J = 2.8$  Hz), 127.9 – 127.7 (m), 37.6 (d,  $J = 68.7$  Hz), 26.7 – 26.4 (m), 25.9, 25.8 (d,  $J = 2.2$  Hz);  $^{31}\text{P}$  NMR (162 MHz,  $\text{CDCl}_3$ )  $\delta$  40.2, 39.4 (d,  $J = 11.6$  Hz). HRMS (ESI) calcd for  $\text{C}_{32}\text{H}_{39}\text{OP}_2\text{S}^+$   $[\text{M}+\text{H}]^+$  533.2191, found 533.2189.

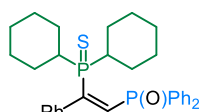

**(8c)** White solid (m.p.: 253 - 255 °C); 68% yield;  $^1\text{H}$  NMR (400 MHz,  $\text{CDCl}_3$ )  $\delta$  7.77 – 7.72 (m, 4H), 7.59 – 7.49 (m, 6H), 7.34 – 7.30 (m, 3H), 7.21 – 7.19 (m, 2H), 6.94 (dd,  $J = 31.5, 21.6$  Hz, 1H), 3.56 – 3.46 (m, 2H), 1.96 – 1.93 (m, 2H), 1.78 – 1.48 (m, 12H), 1.42 – 1.32 (m, 2H), 1.20 – 1.10 (m, 2H), 1.01 – 0.92 (m, 2H);  $^{13}\text{C}$  NMR (101 MHz,  $\text{CDCl}_3$ )  $\delta$  156.8 (d,  $J = 44.4$  Hz), 142.7 (dd,  $J = 17.2, 8.1$  Hz), 133.8 (dd,  $J = 92.7, 7.8$  Hz), 133.5, 132.4 (d,  $J =$

2.6 Hz), 130.9 (d,  $J = 9.5$  Hz), 129.1 (d,  $J = 12.2$  Hz), 128.7 (d,  $J = 2.9$  Hz), 128.0, 127.3, 40.5 (d,  $J = 45.9$  Hz), 27.8 (d,  $J = 2.3$  Hz), 27.3 (d,  $J = 3.0$  Hz), 26.2 – 26.0 (m), 25.6;  $^{31}\text{P NMR}$  (162 MHz,  $\text{CDCl}_3$ )  $\delta$  67.8 (d,  $J = 9.8$  Hz), 18.1 (d,  $J = 8.9$  Hz). HRMS (ESI) calcd for  $\text{C}_{32}\text{H}_{39}\text{OP}_2\text{S}^+ [\text{M}+\text{H}]^+$  533.2191, found 533.2190.

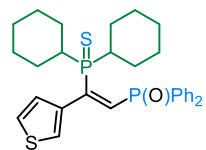

**(8d)** Yellow solid (m.p.: 212 - 214 °C); 89% yield;  $^1\text{H NMR}$  (400 MHz,  $\text{CDCl}_3$ )  $\delta$  7.78 – 7.73 (m, 4H), 7.60 – 7.50 (m, 6H), 7.28 (d,  $J = 1.4$  Hz, 1H), 7.21 (dd,  $J = 4.9, 3.1$  Hz, 1H), 7.10 (d,  $J = 5.0$  Hz, 1H), 6.98 (dd,  $J = 31.3, 21.1$  Hz, 1H), 3.56 – 3.48 (m, 2H), 1.95 (d,  $J = 12.4$  Hz, 2H), 1.78 – 1.76 (m, 2H), 1.72 – 1.49 (m, 10H), 1.42 – 1.32 (m, 2H), 1.20 – 1.10 (m, 2H), 0.98 – 0.88 (m, 2H);  $^{13}\text{C NMR}$  (101 MHz,  $\text{CDCl}_3$ )  $\delta$  151.9 (d,  $J = 45.9$  Hz), 142.9 (dd,  $J = 18.1, 8.8$  Hz), 133.4 – 132.4 (m), 130.9 (d,  $J = 9.6$  Hz), 129.1 (d,  $J = 12.2$  Hz), 129.0, 124.84 (d,  $J = 4.4$  Hz), 123.9, 40.4 (d,  $J = 46.0$  Hz), 27.6 (d,  $J = 2.3$  Hz), 27.0 (d,  $J = 3.0$  Hz), 26.1 (d,  $J = 9.9$  Hz), 26.0 (d,  $J = 10.1$  Hz), 25.6;  $^{31}\text{P NMR}$  (162 MHz,  $\text{CDCl}_3$ )  $\delta$  67.8 (d,  $J = 8.3$  Hz), 18.4 (d,  $J = 8.7$  Hz). HRMS (ESI) calcd for  $\text{C}_{30}\text{H}_{37}\text{OP}_2\text{S}_2 [\text{M}+\text{H}]^+$  539.1756, found 539.1749.

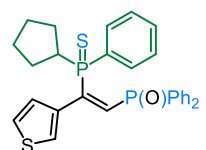

**(8e)** Yellow oil; 75% yield;  $^1\text{H NMR}$  (400 MHz,  $\text{CDCl}_3$ )  $\delta$  7.99 – 7.94 (m, 2H), 7.71 – 7.66 (m, 2H), 7.54 – 7.42 (m, 6H), 7.37 – 7.26 (m, 6H) (overlap one peak of 7.26), 7.21 (dd,  $J = 4.9, 3.1$  Hz, 1H), 7.07 (d,  $J = 4.9$  Hz, 1H), 6.85 (dd,  $J = 35.2, 19.2$  Hz, 1H), 4.32 – 4.22 (m, 1H), 1.85 – 1.74 (m, 2H), 1.69 – 1.65 (m, 1H), 1.59 – 1.45 (m, 5H);  $^{13}\text{C NMR}$  (101 MHz,  $\text{CDCl}_3$ )  $\delta$  153.0 (d,  $J = 57.7$  Hz), 142.2 (dd,  $J = 17.9, 10.7$  Hz), 134.6 (dd,  $J = 93.0, 8.9$  Hz), 134.1 – 132.5 (m) (overlap one peak of 134.6), 132.1 – 132.0 (m), 131.8 (d,  $J = 2.6$  Hz), 131.1 (d,  $J = 2.9$  Hz), 130.9 (d,  $J = 9.7$  Hz), 130.7 (d,  $J = 9.8$  Hz), 128.9 (d,  $J = 12.2$  Hz), 128.8 (d,  $J = 2.3$  Hz), 128.6 (d,  $J = 12.4$  Hz), 128.0 (d,  $J = 12.1$  Hz), 124.7, 124.6 (d,  $J = 4.5$  Hz), 38.7 (d,  $J = 53.9$  Hz), 28.3, 27.6, 26.7 (d,  $J = 10.9$  Hz), 26.6 (d,  $J = 10.3$  Hz);  $^{31}\text{P NMR}$  (162 MHz,  $\text{CDCl}_3$ )  $\delta$  54.2 (d,  $J = 11.9$  Hz), 17.8 (d,  $J = 12.0$  Hz). HRMS (ESI) calcd for  $\text{C}_{29}\text{H}_{29}\text{OP}_2\text{S}_2^+ [\text{M}+\text{H}]^+$  519.1130, found 519.1129.

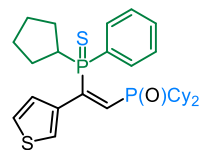

**(8f)** Yellow solid (m.p.: 164 - 166 °C); 76% yield;  $^1\text{H NMR}$  (400 MHz,  $\text{CDCl}_3$ )  $\delta$  7.94 (dd,  $J = 12.5, 7.6$  Hz, 2H), 7.41 – 7.38 (m, 3H), 7.26 – 7.25 (m, 1H) (overlap one peak of 7.26), 7.17 (s, 1H), 7.08 (d,  $J = 4.8$  Hz, 1H), 6.20 (dd,  $J = 35.9, 18.5$  Hz, 1H), 4.44 – 4.35 (m, 1H), 1.98 – 1.79 (m, 9H), 1.72 – 1.61 (m, 8H), 1.50 – 1.41 (m, 5H), 1.25 (s, 3H), 1.09 – 0.97 (m, 5H);  $^{13}\text{C NMR}$  (101 MHz,  $\text{CDCl}_3$ )  $\delta$  154.0 (d,  $J = 57.7$  Hz), 142.8 (dd,  $J = 15.4, 11.3$  Hz), 135.0 (d,  $J = 78.9$  Hz), 134.5 (dd,  $J = 74.8, 10.3$  Hz), 132.3 (d,  $J = 10.1$  Hz), 130.8 (d,  $J = 2.8$  Hz), 129.0 (d,  $J = 1.7$  Hz), 127.8 (d,  $J = 12.1$  Hz), 124.3, 124.0 (d,  $J = 4.5$  Hz), 38.0 (d,  $J = 53.4$  Hz), 37.2 (dd,  $J = 69.1, 2.8$  Hz), 28.1, 27.9, 26.9 – 25.7 (m), 25.4 (d,  $J = 2.8$  Hz), 25.1 (d,  $J = 2.7$  Hz);  $^{31}\text{P NMR}$  (162 MHz,  $\text{CDCl}_3$ )  $\delta$  54.2 (d,  $J = 10.3$  Hz), 41.8 (d,  $J = 8.9$  Hz). HRMS (ESI) calcd for  $\text{C}_{29}\text{H}_{41}\text{OP}_2\text{S}_2^+ [\text{M}+\text{H}]^+$  531.2069, found 531.2067.

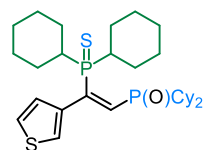

**(8g)** Yellow solid (m.p.: 215 - 217 °C); 88% yield;  $^1\text{H NMR}$  (400 MHz,  $\text{CDCl}_3$ )  $\delta$  7.22 – 7.20 (m, 2H), 7.06 – 7.05 (m, 1H), 6.28 (dd,  $J = 31.9, 20.3$  Hz, 1H), 3.41 (s, 2H), 2.04 – 1.87 (m, 12H), 1.75 – 1.63 (m, 14H), 1.47 – 1.36 (m, 6H), 1.26 – 1.15 (m, 10H);  $^{13}\text{C NMR}$  (101 MHz,  $\text{CDCl}_3$ )  $\delta$  153.3 (d,  $J = 47.0$  Hz), 142.4 (dd,  $J = 15.7, 8.8$  Hz), 131.2 (d,  $J = 71.3$  Hz), 128.0 (d,  $J = 1.9$  Hz), 123.3 (d,  $J = 4.3$  Hz), 122.8, 39.8 (d,  $J = 45.7$  Hz), 36.4 (d,  $J = 69.2$  Hz), 26.4 (d,  $J = 2.7$  Hz), 26.1 (d,  $J = 2.9$  Hz), 25.7 – 25.4 (m), 25.1 (d,  $J = 2.6$  Hz), 24.9 (d,  $J = 2.5$  Hz), 24.8, 24.8 (d,  $J = 3.0$  Hz), 24.6;  $^{31}\text{P NMR}$  (162 MHz,  $\text{CDCl}_3$ )  $\delta$  68.1, 42.1. HRMS (ESI) calcd for  $\text{C}_{30}\text{H}_{49}\text{OP}_2\text{S}_2^+ [\text{M}+\text{H}]^+$  551.2695, found 551.2691.

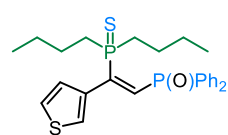

**(8h)** Yellow solid (m.p.: 91 - 93 °C); 75% yield;  $^1\text{H NMR}$  (400 MHz,  $\text{CDCl}_3$ )  $\delta$  7.76 – 7.71 (m, 4H), 7.57 – 7.47 (m, 6H), 7.41 – 7.40 (m, 1H), 7.25 (dd,  $J = 5.0, 3.1$  Hz, 1H), 7.16 (d,  $J = 4.9$  Hz, 1H), 6.92 (dd,  $J = 33.3, 20.1$  Hz, 1H), 2.90 – 2.79 (m, 2H), 2.39 – 2.29 (m, 2H), 1.73 – 1.60 (m, 2H), 1.46 – 1.35 (m, 2H), 1.33 – 1.24 (m, 2H), 1.20 – 1.13 (m, 2H), 0.78 (t,  $J = 7.3$  Hz, 6H);  $^{13}\text{C NMR}$  (101 MHz,  $\text{CDCl}_3$ )  $\delta$  151.8 (d,  $J = 52.0$  Hz), 142.3 (dd,  $J = 18.0, 10.1$  Hz), 133.9 (dd,  $J = 92.8, 8.6$  Hz), 133.1 (d,  $J = 107.8$  Hz), 132.3 (d,  $J = 2.7$  Hz), 130.9 (d,  $J = 9.6$  Hz), 129.0 (d,  $J = 12.3$  Hz), 128.8 (d,  $J = 2.2$  Hz), 125.0 (d,  $J = 4.5$  Hz), 124.6, 33.8 (d,  $J = 50.9$  Hz), 24.7 (d,  $J = 4.1$  Hz), 23.7

(d,  $J = 17.5$  Hz), 13.7;  $^{31}\text{P}$  NMR (162 MHz,  $\text{CDCl}_3$ )  $\delta$  51.9 (d,  $J = 11.8$  Hz), 18.6 (d,  $J = 10.6$  Hz). HRMS (ESI) calcd for  $\text{C}_{26}\text{H}_{33}\text{OP}_2\text{S}_2^+$   $[\text{M}+\text{H}]^+$  487.1433, found 487.1433.

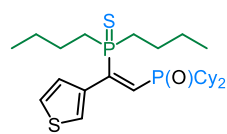

**(8i)** White solid (m.p.: 174 - 176 °C); 73% yield;  $^1\text{H}$  NMR (400 MHz,  $\text{CDCl}_3$ )  $\delta$  7.24 – 7.23 (m, 2H), 7.08 – 7.06 (m, 1H), 6.19 (dd,  $J = 33.6, 20.1$  Hz, 1H), 2.83 – 2.73 (m, 2H), 2.45 – 2.34 (m, 2H), 2.01 – 1.98 (m, 2H), 1.87 – 1.73 (m, 12H), 1.57 – 1.30 (m, 12H), 1.25 – 1.17 (m, 4H), 0.90 (t,  $J = 7.2$  Hz, 6H);  $^{13}\text{C}$  NMR (101 MHz,  $\text{CDCl}_3$ )  $\delta$  153.4 (d,  $J = 51.8$  Hz), 143.0 (dd,  $J = 15.5, 10.4$  Hz), 132.8 (dd,  $J = 74.3, 9.4$  Hz), 128.9 (d,  $J = 1.9$  Hz), 124.2 – 124.1 (m), 36.5 (d,  $J = 69.7$  Hz), 34.1 (d,  $J = 50.9$  Hz), 26.6 – 26.2 (m), 25.8, 25.2 (d,  $J = 3.0$  Hz), 24.9 (d,  $J = 4.0$  Hz), 23.9 (d,  $J = 18.2$  Hz), 13.9;  $^{31}\text{P}$  NMR (162 MHz,  $\text{CDCl}_3$ )  $\delta$  51.3 (d,  $J = 10.0$  Hz), 42.4 (d,  $J = 7.3$  Hz). HRMS (ESI) calcd for  $\text{C}_{26}\text{H}_{45}\text{OP}_2\text{S}_2^+$   $[\text{M}+\text{H}]^+$  499.2382, found 499.2372.

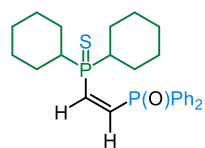

**(8j)** White solid (m.p.: 199 - 201 °C); 59% yield;  $^1\text{H}$  NMR (400 MHz,  $\text{CDCl}_3$ )  $\delta$  7.71 – 7.66 (m, 4H), 7.58 – 7.54 (m, 2H), 7.50 – 7.46 (m, 4H), 6.99 – 6.74 (m, 2H), 3.13 – 3.04 (m, 2H), 1.91 – 1.88 (m, 2H), 1.78 – 1.75 (m, 2H), 1.59 – 1.41 (m, 10H), 1.38 – 1.27 (m, 2H), 1.18 – 0.97 (m, 4H);  $^{13}\text{C}$  NMR (101 MHz,  $\text{CDCl}_3$ )  $\delta$  148.6 (d,  $J = 56.1$  Hz), 135.8 (dd,  $J = 94.1, 2.3$  Hz), 132.4 (d,  $J = 2.6$  Hz), 132.2 (d,  $J = 106.7$  Hz), 130.9 (d,  $J = 9.7$  Hz), 129.0 (d,  $J = 12.3$  Hz), 39.0 (d,  $J = 46.8$  Hz), 27.1 (d,  $J = 3.3$  Hz), 27.0 (d,  $J = 2.3$  Hz), 26.1 (d,  $J = 5.0$  Hz), 26.0 (d,  $J = 4.7$  Hz), 25.6 (d,  $J = 1.2$  Hz);  $^{31}\text{P}$  NMR (162 MHz,  $\text{CDCl}_3$ )  $\delta$  60.7 (d,  $J = 18.0$  Hz), 18.8 (d,  $J = 18.0$  Hz). HRMS (ESI) calcd for  $\text{C}_{26}\text{H}_{35}\text{OP}_2\text{S}^+$   $[\text{M}+\text{H}]^+$  457.1878, found 457.1877.

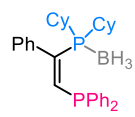

**(10a)** White solid (m.p.: 160 - 162 °C); 60% yield;  $^1\text{H}$  NMR (400 MHz,  $\text{CDCl}_3$ )  $\delta$  7.35 – 7.12 (m, 16H), 2.84 – 2.73 (m, 2H), 1.90 – 1.87 (m, 2H), 1.76 – 1.69 (m, 4H), 1.60 – 1.36 (m, 8H), 1.20 – 1.04 (m, 4H), 0.93 – 0.83 (m, 2H), 0.54 – -0.22 (m, 3H);  $^{13}\text{C}$  NMR (101 MHz,  $\text{CDCl}_3$ )  $\delta$  150.4 (dd,  $J = 34.4, 26.1$  Hz), 147.2 (d,  $J = 18.8$  Hz), 143.7 (dd,  $J = 13.4, 10.7$  Hz), 137.9 (d,  $J = 8.8$  Hz), 132.7 (d,  $J = 19.1$  Hz), 129.2, 128.9 (d,  $J = 6.9$  Hz), 128.3 (d,  $J = 3.1$  Hz), 127.61, 127.59, 36.5 (dd,  $J = 29.8, 15.0$  Hz), 28.5, 28.0, 26.9 (d,  $J = 11.9$  Hz), 26.7 (d,  $J = 11.5$  Hz), 25.8 (d,  $J = 1.1$  Hz);  $^{31}\text{P}$  NMR (162 MHz,  $\text{CDCl}_3$ )  $\delta$  35.0, -30.2;  $^{11}\text{B}$  NMR (128 MHz,  $\text{CDCl}_3$ )  $\delta$  -42.0. HRMS (ESI) calcd for  $\text{C}_{32}\text{H}_{42}\text{BP}_2^+$   $[\text{M}+\text{H}]^+$  499.2849, found 499.2846.

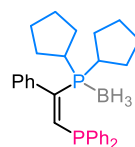

**(10b)** White solid (m.p.: 100 - 102 °C); 70% yield;  $^1\text{H}$  NMR (400 MHz,  $\text{CDCl}_3$ )  $\delta$  7.32 – 7.17 (m, 13H), 7.13 – 7.05 (m, 3H), 3.17 – 3.04 (m, 2H), 1.87 – 1.77 (m, 4H), 1.70 – 1.42 (m, 10H), 1.34 – 1.26 (m, 2H), 0.69 – -0.09 (m, 3H);  $^{13}\text{C}$  NMR (101 MHz,  $\text{CDCl}_3$ )  $\delta$  151.1 (dd,  $J = 36.5, 25.0$  Hz), 146.0 (dd,  $J = 19.8, 1.5$  Hz), 142.5 (dd,  $J = 13.0, 10.6$  Hz), 137.1 (d,  $J = 9.0$  Hz), 131.5 (d,  $J = 18.9$  Hz), 128.0, 127.8 (d,  $J = 6.7$  Hz), 127.2 (d,  $J = 2.9$  Hz), 126.55, 126.50, 35.5 (dd,  $J = 33.1, 15.2$  Hz), 28.3 (d,  $J = 2.5$  Hz), 27.4 (d,  $J = 3.9$  Hz), 25.7 (d,  $J = 9.8$  Hz), 24.7 (d,  $J = 10.1$  Hz);  $^{31}\text{P}$  NMR (162 MHz,  $\text{CDCl}_3$ )  $\delta$  35.0, -30.1;  $^{11}\text{B}$  NMR (128 MHz,  $\text{CDCl}_3$ )  $\delta$  -43.9. HRMS (ESI) calcd for  $\text{C}_{30}\text{H}_{38}\text{BP}_2^+$   $[\text{M}+\text{H}]^+$  471.2536, found 471.2535.

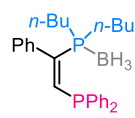

**(10c)** Colorless oil; 64% yield;  $^1\text{H}$  NMR (400 MHz,  $\text{CDCl}_3$ )  $\delta$  7.52 – 7.48 (m, 4H), 7.42 – 7.31 (m, 11H), 7.18 (dd,  $J = 30.0, 3.7$  Hz, 1H), 2.12 – 2.05 (m, 4H), 1.54 – 1.45 (m, 4H), 1.34 – 1.25 (m, 4H), 1.06 – 0.27 (m, 9H);  $^{13}\text{C}$  NMR (101 MHz,  $\text{CDCl}_3$ )  $\delta$  150.2 (dd,  $J = 37.7, 27.1$  Hz), 146.7 (dd,  $J = 20.8, 7.3$  Hz), 142.6 – 142.4 (m), 138.2 (d,  $J = 9.7$  Hz), 132.8 (d,  $J = 19.0$  Hz), 129.0, 128.8 (d,  $J = 6.6$  Hz), 128.2, 128.0, 127.8 (d,  $J = 2.7$  Hz), 25.6 (dd,  $J = 34.2, 12.0$  Hz), 25.2 (d,  $J = 2.2$  Hz), 24.3 (d,  $J = 13.7$  Hz), 13.6;  $^{31}\text{P}$  NMR (162 MHz,  $\text{CDCl}_3$ )  $\delta$  20.6, -29.6 (d,  $J = 5.7$  Hz);  $^{11}\text{B}$  NMR (128 MHz,  $\text{CDCl}_3$ )  $\delta$  -36.6. HRMS (ESI) calcd for  $\text{C}_{28}\text{H}_{38}\text{BP}_2^+$   $[\text{M}+\text{H}]^+$  447.2536, found 447.2531.

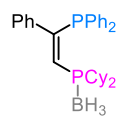

**(10d)** White solid (m.p.: 158 - 160 °C); 60% yield;  $^1\text{H}$  NMR (400 MHz,  $\text{CDCl}_3$ )  $\delta$  7.36 – 7.27 (m, 10H), 7.12 (t,  $J = 7.2$  Hz, 1H), 7.04 (t,  $J = 7.4$  Hz, 2H), 6.80 (d,  $J = 7.4$  Hz, 2H), 6.53 (dd,  $J = 36.7, 12.8$  Hz, 1H), 2.38 – 2.29 (m, 2H), 2.06 – 1.96 (m, 4H), 1.88 – 1.82 (m, 4H), 1.76 – 1.71 (m, 2H), 1.61 – 1.52 (m, 4H), 1.31 – 1.21 (m, 6H), 0.91 – 0.61 (m, 3H);  $^{13}\text{C}$  NMR (101 MHz,  $\text{CDCl}_3$ )  $\delta$  160.1 (d,  $J = 32.7$  Hz), 142.8 (dd,  $J = 12.8, 4.3$  Hz), 136.8 (dd,  $J = 42.9, 39.7$  Hz), 135.4

(d,  $J = 13.1$  Hz), 133.4 (d,  $J = 19.3$  Hz), 128.6, 128.2 (d,  $J = 6.4$  Hz), 127.8, 127.5, 127.4, 34.7 (dd,  $J = 32.9, 6.3$  Hz), 27.4 (d,  $J = 9.7$  Hz), 26.9 (d,  $J = 11.3$  Hz), 26.0;  $^{31}\text{P}$  NMR (162 MHz,  $\text{CDCl}_3$ )  $\delta$  21.7, -5.7 (d,  $J = 13.8$  Hz);  $^{11}\text{B}$  NMR (128 MHz,  $\text{CDCl}_3$ )  $\delta$  -39.6. HRMS (ESI) calcd for  $\text{C}_{32}\text{H}_{42}\text{BP}_2^+$   $[\text{M}+\text{H}]^+$  499.2849, found 499.2838.

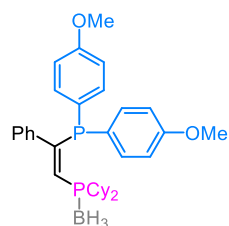

**(10e)** White solid (m.p.: 133 - 135 °C); 45% yield;  $^1\text{H}$  NMR (400 MHz,  $\text{CDCl}_3$ )  $\delta$  7.22 (t,  $J = 15.4$  Hz, 4H), 7.12 (t,  $J = 7.3$  Hz, 1H), 7.04 (t,  $J = 7.6$  Hz, 2H), 6.79 (d,  $J = 8.1$  Hz, 4H), 6.74 (d,  $J = 7.3$  Hz, 2H), 6.40 (dd,  $J = 36.5, 13.6$  Hz, 1H), 3.78 (s, 6H), 2.39 - 2.30 (m, 2H), 2.04 - 1.94 (m, 4H), 1.87 - 1.80 (m, 4H), 1.74 - 1.69 (m, 2H), 1.55 - 1.52 (m, 4H), 1.30 - 1.21 (m, 6H), 0.98 - 0.33 (m, 3H);  $^{13}\text{C}$  NMR (101 MHz,  $\text{CDCl}_3$ )  $\delta$  161.2 (d,  $J = 33.5$  Hz), 160.2, 143.2 (dd,  $J = 13.0, 4.6$  Hz), 135.8 (dd,  $J = 43.2, 40.1$  Hz), 135.0 (d,  $J = 20.9$  Hz), 127.8, 127.5, 127.3, 126.4 (d,  $J = 10.2$  Hz), 113.9 (d,  $J = 7.4$  Hz), 55.2, 34.7 (dd,  $J = 32.9, 6.9$  Hz), 27.6, 27.4, 27.0, 26.9, 26.0;  $^{31}\text{P}$  NMR (162 MHz,  $\text{CDCl}_3$ )  $\delta$  21.6, -8.9 (d,  $J = 13.8$  Hz);  $^{11}\text{B}$  NMR (128 MHz,  $\text{CDCl}_3$ )  $\delta$  -39.6. HRMS (ESI) calcd for  $\text{C}_{34}\text{H}_{46}\text{BO}_2\text{P}_2^+$   $[\text{M}+\text{H}]^+$  559.3061, found 559.3053.

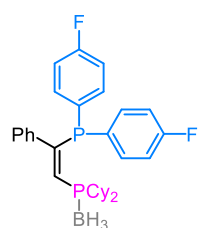

**(10f)** White solid (m.p.: 128 - 130 °C); 63% yield;  $^1\text{H}$  NMR (400 MHz,  $\text{CDCl}_3$ )  $\delta$  7.29 - 7.23 (m, 4H) (overlap one peak of 7.26), 7.12 (t,  $J = 7.4$  Hz, 1H), 7.04 (t,  $J = 7.8$  Hz, 2H), 6.96 - 6.92 (m, 4H), 6.69 (d,  $J = 7.2$  Hz, 2H), 6.47 (dd,  $J = 36.1, 10.1$  Hz, 1H), 2.24 - 2.16 (m, 2H), 2.05 - 1.73 (m, 10H), 1.57 - 1.47 (m, 4H), 1.30 - 1.21 (m, 6H), 0.94 - 0.34 (m, 3H);  $^{13}\text{C}$  NMR (101 MHz,  $\text{CDCl}_3$ )  $\delta$  163.3 (d,  $J = 250.2$  Hz), 160.4 (dd,  $J = 33.4, 2.9$  Hz), 142.7 (dd,  $J = 12.9, 4.5$  Hz), 137.1 - 136.3 (m), 135.4 (dd,  $J = 21.1, 8.0$  Hz), 130.9 (dd,  $J = 13.6, 3.4$  Hz), 127.7, 127.58, 127.55, 115.5 (dd,  $J = 21.0, 7.0$  Hz), 34.6 (dd,  $J = 33.2, 4.8$  Hz), 27.34, 27.28, 27.0 (d,  $J = 4.3$  Hz), 26.9 (d,  $J = 5.1$  Hz), 26.0;  $^{31}\text{P}$  NMR (162 MHz,  $\text{CDCl}_3$ )  $\delta$  21.6, -7.53 - -7.69 (m);  $^{19}\text{F}$  NMR (376 MHz,  $\text{CDCl}_3$ )  $\delta$  -112.0 (d,  $J = 4.9$  Hz);  $^{11}\text{B}$  NMR (128 MHz,  $\text{CDCl}_3$ )  $\delta$  -39.4. HRMS (ESI) calcd for  $\text{C}_{32}\text{H}_{40}\text{BF}_2\text{P}_2^+$   $[\text{M}-\text{BH}_2]^+$  521.2334, found 521.2329.

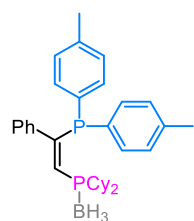

**(10g)** White solid (m.p.: 148 - 150 °C); 56% yield;  $^1\text{H}$  NMR (400 MHz,  $\text{CDCl}_3$ )  $\delta$  7.21 - 7.00 (m, 11H), 6.77 (d,  $J = 7.4$  Hz, 2H), 6.45 (dd,  $J = 36.8, 13.9$  Hz, 1H), 2.39 - 2.31 (m, 8H), 2.03 - 1.93 (m, 4H), 1.84 - 1.79 (m, 4H), 1.73 - 1.68 (m, 2H), 1.57 - 1.50 (m, 4H), 1.29 - 1.22 (m, 6H), 0.84 - 0.23 (m, 3H);  $^{13}\text{C}$  NMR (101 MHz,  $\text{CDCl}_3$ )  $\delta$  160.5 (d,  $J = 32.9$  Hz), 143.0 (dd,  $J = 12.7, 4.5$  Hz), 138.5, 136.5 (dd,  $J = 43.2, 40.0$  Hz), 133.5 (d,  $J = 19.6$  Hz), 131.9 (d,  $J = 11.7$  Hz), 129.0 (d,  $J = 6.6$  Hz), 127.8, 127.5, 127.3, 34.7 (dd,  $J = 32.9, 6.9$  Hz), 27.5 (d,  $J = 13.0$  Hz), 26.9 (d,  $J = 11.3$  Hz), 26.0, 21.3;  $^{31}\text{P}$  NMR (162 MHz,  $\text{CDCl}_3$ )  $\delta$  21.8, -7.1 (d,  $J = 13.2$  Hz);  $^{11}\text{B}$  NMR (128 MHz,  $\text{CDCl}_3$ )  $\delta$  -40.1. HRMS (ESI) calcd for  $\text{C}_{34}\text{H}_{46}\text{BP}_2^+$   $[\text{M}-\text{BH}_2]^+$  513.2835, found 513.2844.

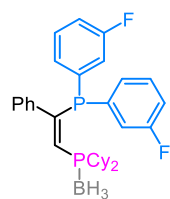

**(10h)** White solid (m.p.: 155 - 156 °C); 57% yield;  $^1\text{H}$  NMR (400 MHz,  $\text{CDCl}_3$ )  $\delta$  7.27 - 7.21 (m, 2H), 7.15 - 7.11 (m, 3H), 7.07 - 7.03 (m, 2H), 7.01 - 6.94 (m, 4H), 6.77 (d,  $J = 7.2$  Hz, 2H), 6.57 (dd,  $J = 36.5, 9.4$  Hz, 1H), 2.23 - 2.14 (m, 2H), 2.06 - 1.74 (m, 10H), 1.58 - 1.49 (m, 4H), 1.34 - 1.20 (m, 6H), 1.01 - 0.25 (m, 3H);  $^{13}\text{C}$  NMR (101 MHz,  $\text{CDCl}_3$ )  $\delta$  162.5 (dd,  $J = 249.8, 7.3$  Hz), 159.4 (dd,  $J = 33.3, 2.9$  Hz), 142.4 (dd,  $J = 12.6, 4.3$  Hz), 138.1 - 137.1 (m), 130.0 - 129.8 (m), 129.2 (dd,  $J = 21.6, 2.9$  Hz), 127.8, 127.5, 119.8 (dd,  $J = 21.8, 18.2$  Hz), 115.8 (d,  $J = 21.3$  Hz), 34.6 (dd,  $J = 33.2, 4.4$  Hz), 27.31, 27.25, 27.0 (d,  $J = 4.9$  Hz), 26.9 (d,  $J = 5.8$  Hz), 26.0;  $^{31}\text{P}$  NMR (162 MHz,  $\text{CDCl}_3$ )  $\delta$  21.9, -5.0 (d,  $J = 15.4$  Hz);  $^{19}\text{F}$  NMR (376 MHz,  $\text{CDCl}_3$ )  $\delta$  -112.3;  $^{11}\text{B}$  NMR (128 MHz,  $\text{CDCl}_3$ )  $\delta$  -39.4. HRMS (ESI) calcd for  $\text{C}_{32}\text{H}_{40}\text{BF}_2\text{P}_2^+$   $[\text{M}+\text{H}]^+$  535.2661, found 535.2671.

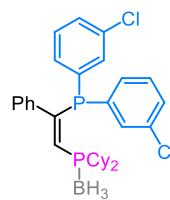

**(10i)** White solid (m.p.: 161 - 163 °C); 54% yield;  $^1\text{H}$  NMR (400 MHz,  $\text{CDCl}_3$ )  $\delta$  7.25 - 7.03 (m, 11H), 6.73 - 6.71 (m, 2H), 6.55 (dd,  $J = 36.1, 9.2$  Hz, 1H), 2.20 - 2.11 (m, 2H), 2.04 - 1.73 (m, 10H), 1.56 - 1.47 (m, 4H), 1.33 - 1.20 (m, 6H), 1.09 - 0.20 (m, 3H);  $^{13}\text{C}$  NMR (101 MHz,  $\text{CDCl}_3$ )  $\delta$  159.4 (dd,  $J = 33.4, 3.1$  Hz), 142.3 (dd,  $J = 12.8, 4.3$  Hz), 137.6 (d,  $J = 17.5$  Hz), 137.8 - 137.0 (m), 134.5 (d,  $J = 6.3$  Hz), 132.9 (d,  $J = 18.9$  Hz), 131.5 (d,  $J = 21.1$  Hz), 129.6 (d,  $J = 7.0$  Hz), 128.9, 127.8, 127.5, 34.5 (dd,  $J = 33.4, 4.3$  Hz), 27.3, 27.2, 27.0 (d,  $J =$

5.8 Hz), 26.9 (d,  $J = 6.9$  Hz), 26.0;  $^{31}\text{P}$  NMR (162 MHz,  $\text{CDCl}_3$ )  $\delta$  21.9, -4.8 (d,  $J = 15.0$  Hz);  $^{11}\text{B}$  NMR (128 MHz,  $\text{CDCl}_3$ )  $\delta$  -39.7. HRMS (ESI) calcd for  $\text{C}_{32}\text{H}_{40}\text{BCl}_2\text{P}_2^+$   $[\text{M}+\text{H}]^+$  567.2070, found 567.2072.

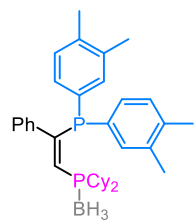

**(10j)** White solid (m.p.: 115 - 117 °C); 61% yield;  $^1\text{H}$  NMR (400 MHz,  $\text{CDCl}_3$ )  $\delta$  7.12 - 6.98 (m, 9H), 6.78 - 6.76 (m, 2H), 6.43 (dd,  $J = 37.1, 15.4$  Hz, 1H), 2.46 - 2.37 (m, 2H), 2.23 (s, 6H), 2.15 (s, 6H), 2.06 - 1.95 (m, 4H), 1.86 - 1.72 (m, 4H), 1.72 - 1.70 (m, 2H), 1.60 - 1.49 (m, 4H), 1.30 - 1.24 (m, 6H), 0.98 - 0.31 (m, 3H);  $^{13}\text{C}$  NMR (101 MHz,  $\text{CDCl}_3$ )  $\delta$  160.8 (d,  $J = 32.8$  Hz), 143.2 (dd,  $J = 12.8, 4.5$  Hz), 137.2, 136.8 - 136.0 (m), 134.7 (d,  $J = 20.5$  Hz), 132.2 (d,  $J = 11.0$  Hz), 131.0 (d,  $J = 18.6$  Hz), 129.5 (d,  $J = 6.7$  Hz), 127.9, 127.4, 127.3, 34.8 (dd,  $J = 32.8, 7.8$  Hz), 27.6 (d,  $J = 17.0$  Hz), 26.9 (d,  $J = 11.4$  Hz), 26.0, 19.7, 19.6;  $^{31}\text{P}$  NMR (162 MHz,  $\text{CDCl}_3$ )  $\delta$  21.8, -7.2 (d,  $J = 12.9$  Hz);  $^{11}\text{B}$  NMR (128 MHz,  $\text{CDCl}_3$ )  $\delta$  -40.4. HRMS (ESI) calcd for  $\text{C}_{36}\text{H}_{50}\text{BP}_2^+$   $[\text{M}-\text{BH}_2]^+$  541.3148, found 541.3138.

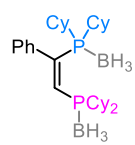

**(10k)** White solid (m.p.: 173 - 175 °C); 40% yield;  $^1\text{H}$  NMR (400 MHz,  $\text{CDCl}_3$ )  $\delta$  7.34 - 7.26 (m, 3H), 7.12 (d,  $J = 6.1$  Hz, 2H), 6.48 (d,  $J = 24.8$  Hz, 1H), 3.12 - 3.03 (m, 2H), 2.01 - 1.44 (m, 29H), 1.38 - -0.20 (m, 19H);  $^{13}\text{C}$  NMR (101 MHz,  $\text{CDCl}_3$ )  $\delta$  157.9 (dd,  $J = 30.5, 2.4$  Hz), 145.0 (t,  $J = 13.0$  Hz), 135.5 (d,  $J = 32.8$  Hz), 127.9, 127.7, 35.2 (d,  $J = 29.3$  Hz), 35.1 (d,  $J = 35.7$  Hz), 28.23, 28.16, 27.2, 27.0 - 26.8 (m), 26.4 - 26.2 (m), 26.0, 25.7;  $^{31}\text{P}$  NMR (162 MHz,  $\text{CDCl}_3$ )  $\delta$  33.7, 19.1,  $^{11}\text{B}$  NMR (128 MHz,  $\text{CDCl}_3$ )  $\delta$  -39.1, -42.9. HRMS (ESI) calcd for  $\text{C}_{32}\text{H}_{54}\text{BP}_2^+$   $[\text{M}-\text{BH}_2]^+$  511.3789, found 511.3782.

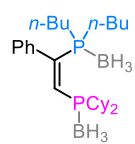

**(10l)** White solid (m.p.: 120 - 122 °C); 65% yield;  $^1\text{H}$  NMR (400 MHz,  $\text{CDCl}_3$ )  $\delta$  7.39 - 7.34 (m, 3H), 7.16 - 7.14 (m, 2H), 6.38 (d,  $J = 28.6$  Hz, 1H), 2.14 - 1.72 (m, 16H), 1.47 - 1.38 (m, 8H), 1.34 - 1.21 (m, 10H), 0.93 - 0.17 (m, 12H);  $^{13}\text{C}$  NMR (101 MHz,  $\text{CDCl}_3$ )  $\delta$  156.0 (dd,  $J = 32.8, 1.9$  Hz), 143.8 (dd,  $J = 12.4, 9.7$  Hz), 136.7 (dd,  $J = 33.8, 4.7$  Hz), 128.2, 128.1, 127.3 (d,  $J = 1.9$  Hz), 34.7 (d,  $J = 34.8$  Hz), 27.1 - 26.7 (m), 26.0, 25.30, 25.28, 25.0, 24.2 (d,  $J = 14.5$  Hz), 13.7;  $^{31}\text{P}$  NMR (162 MHz,  $\text{CDCl}_3$ )  $\delta$  19.7, 19.0;  $^{11}\text{B}$  NMR (128 MHz,  $\text{CDCl}_3$ )  $\delta$  -37.4, -39.3. HRMS (ESI) calcd for  $\text{C}_{28}\text{H}_{50}\text{BP}_2^+$   $[\text{M}-\text{BH}_2]^+$  459.3476, found 459.3470.

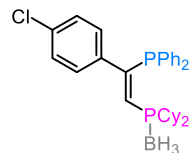

**(10m)** White solid (m.p.: 160 - 162 °C); 65% yield;  $^1\text{H}$  NMR (400 MHz,  $\text{CDCl}_3$ )  $\delta$  7.32 - 7.22 (m, 10H), 6.97 (d,  $J = 8.6$  Hz, 2H), 6.69 (d,  $J = 8.5$  Hz, 2H), 6.48 (dd,  $J = 36.5, 12.7$  Hz, 1H), 2.35 - 2.26 (m, 2H), 2.02 - 1.69 (m, 10H), 1.57 - 1.47 (m, 4H), 1.26 - 1.15 (m, 6H), 0.95 - 0.40 (m, 3H);  $^{13}\text{C}$  NMR (101 MHz,  $\text{CDCl}_3$ )  $\delta$  158.8 (d,  $J = 33.5$  Hz), 141.1 (dd,  $J = 12.9, 4.6$  Hz), 137.6 (dd,  $J = 41.9, 39.7$  Hz), 135.0 (d,  $J = 13.3$  Hz), 133.5 - 133.2 (m), 129.1, 128.8, 128.4 (d,  $J = 6.4$  Hz), 127.7, 34.7 (dd,  $J = 32.7, 6.5$  Hz), 27.53, 27.45, 27.0, 26.9, 26.0;  $^{31}\text{P}$  NMR (162 MHz,  $\text{CDCl}_3$ )  $\delta$  22.6, -6.2 (d,  $J = 13.6$  Hz);  $^{11}\text{B}$  NMR (128 MHz,  $\text{CDCl}_3$ )  $\delta$  -39.8. HRMS (ESI) calcd for  $\text{C}_{32}\text{H}_{41}\text{BClP}_2^+$   $[\text{M}-\text{BH}_2]^+$  519.2132, found 519.2127.

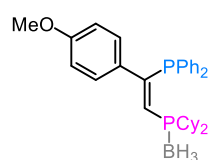

**(10n)** Colorless oil; 63% yield;  $^1\text{H}$  NMR (400 MHz,  $\text{CDCl}_3$ )  $\delta$  7.27 - 7.23 (m, 4H), 7.19 - 7.15 (m, 6H), 6.70 (d,  $J = 8.7$  Hz, 2H), 6.49 - 6.35 (m, 3H), 3.60 (s, 3H), 2.29 - 2.20 (m, 2H), 1.93 - 1.83 (m, 4H), 1.74 - 1.68 (m, 4H), 1.61 - 1.60 (m, 2H), 1.49 - 1.39 (m, 4H), 1.17 - 1.03 (m, 6H), 0.80 - 0.33 (m, 3H);  $^{13}\text{C}$  NMR (101 MHz,  $\text{CDCl}_3$ )  $\delta$  159.18, 159.15 (d,  $J = 31.6$  Hz), 136.0 (dd,  $J = 43.5, 40.3$  Hz), 135.5 (d,  $J = 13.2$  Hz), 135.1 (dd,  $J = 13.0, 4.3$  Hz), 133.2 (d,  $J = 19.2$  Hz), 129.3, 128.5, 128.2 (d,  $J = 6.4$  Hz), 113.0, 55.2, 34.8 (dd,  $J = 32.9, 7.0$  Hz), 27.6, 27.5, 27.0, 26.8, 26.0;  $^{31}\text{P}$  NMR (162 MHz,  $\text{CDCl}_3$ )  $\delta$  21.9, -5.8 (d,  $J = 14.6$  Hz);  $^{11}\text{B}$  NMR (128 MHz,  $\text{CDCl}_3$ )  $\delta$  -39.9. HRMS (ESI) calcd for  $\text{C}_{33}\text{H}_{44}\text{BOP}_2^+$   $[\text{M}+\text{H}]^+$  529.2955, found 529.2953.

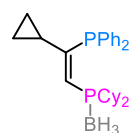

**(10o)** White solid (m.p.: 136 - 138 °C); 64% yield;  $^1\text{H}$  NMR (400 MHz,  $\text{CDCl}_3$ )  $\delta$  7.44 - 7.39 (m, 4H), 7.38 - 7.34 (m, 6H), 5.82 (dd,  $J = 39.1, 15.8$  Hz, 1H), 2.39 - 2.30 (m, 2H), 1.92 - 1.89 (m, 2H), 1.76 - 1.62 (m, 8H), 1.54 - 1.34 (m, 5H), 1.22 - 1.00 (m, 6H), 0.87 - 0.18 (m, 7H);  $^{13}\text{C}$  NMR (101 MHz,  $\text{CDCl}_3$ )  $\delta$  162.5 (d,  $J = 24.9$  Hz), 136.0 (d,

$J = 12.8$  Hz), 133.3 (d,  $J = 18.7$  Hz), 128.6, 128.5 (d,  $J = 6.4$  Hz), 125.3 (dd,  $J = 49.8, 36.6$  Hz), 34.6 (dd,  $J = 33.0, 8.9$  Hz), 27.7–25.9 (m), 18.9 (dd,  $J = 13.0, 3.2$  Hz), 11.1;  $^{31}\text{P NMR}$  (162 MHz,  $\text{CDCl}_3$ )  $\delta$  20.9, -6.7 (d,  $J = 13.2$  Hz);  $^{11}\text{B NMR}$  (128 MHz,  $\text{CDCl}_3$ )  $\delta$  -40.7. HRMS (ESI) calcd for  $\text{C}_{29}\text{H}_{42}\text{BP}_2^+ [\text{M}+\text{H}]^+$  463.2849, found 463.2842.

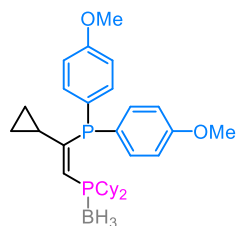

**(10p)** White solid (m.p.: 130 - 132 °C); 55% yield;  $^1\text{H NMR}$  (400 MHz,  $\text{CDCl}_3$ )  $\delta$  7.32 (dd,  $J = 8.7, 6.9$  Hz, 4H), 6.89 (d,  $J = 7.9$  Hz, 4H), 5.73 (dd,  $J = 38.6, 16.5$  Hz, 1H), 3.80 (s, 6H), 2.40 – 2.31 (m, 2H), 1.91 – 1.87 (m, 2H), 1.76 – 1.61 (m, 8H), 1.54 – 1.31 (m, 5H), 1.21 – 1.00 (m, 6H), 0.85 – 0.29 (m, 7H);  $^{13}\text{C NMR}$  (101 MHz,  $\text{CDCl}_3$ )  $\delta$  163.5 (d,  $J = 25.3$  Hz), 160.2, 134.7 (d,  $J = 20.2$  Hz), 127.1 (d,  $J = 10.0$  Hz), 124.2 (dd,  $J = 50.5, 36.5$  Hz), 114.2 (d,  $J = 7.2$  Hz), 55.2, 34.6 (dd,  $J = 33.2, 9.6$  Hz), 27.7, 27.4, 26.8 (d,  $J = 12.1$  Hz), 26.7 (d,  $J = 11.0$  Hz), 25.9, 18.6 (dd,  $J = 13.2, 3.3$  Hz), 11.0;  $^{31}\text{P NMR}$  (162 MHz,  $\text{CDCl}_3$ )  $\delta$  20.5, -9.5 (d,  $J = 12.1$  Hz);  $^{11}\text{B NMR}$  (128 MHz,  $\text{CDCl}_3$ )  $\delta$  -40.7. HRMS (ESI) calcd for  $\text{C}_{31}\text{H}_{46}\text{BO}_2\text{P}_2^+ [\text{M}+\text{H}]^+$  523.3061, found 523.3057.

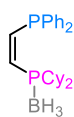

**(10q)** White solid (m.p.: 93 - 95 °C); 64% yield;  $^1\text{H NMR}$  (400 MHz,  $\text{CDCl}_3$ )  $\delta$  7.45 – 7.26 (m, 11H), 6.51 (dt,  $J = 31.8, 14.6$  Hz, 1H), 2.25 – 2.17 (m, 2H), 1.94 – 1.68 (m, 10H), 1.42 – 1.34 (m, 4H), 1.26 – 1.14 (m, 6H), 0.89 – 0.22 (m, 3H);  $^{13}\text{C NMR}$  (101 MHz,  $\text{CDCl}_3$ )  $\delta$  150.7 (d,  $J = 20.4$  Hz), 138.4 (d,  $J = 10.7$  Hz), 135.3 (dd,  $J = 42.9, 27.6$  Hz), 132.8 (d,  $J = 18.9$  Hz), 128.9, 128.7 (d,  $J = 6.6$  Hz), 33.4 (dd,  $J = 32.9, 6.2$  Hz), 27.1 – 26.7 (m), 25.9;  $^{31}\text{P NMR}$  (162 MHz,  $\text{CDCl}_3$ )  $\delta$  24.0 (d,  $J = 57.0$  Hz), -26.5 (d,  $J = 2.5$  Hz);  $^{11}\text{B NMR}$  (193 MHz,  $\text{CDCl}_3$ )  $\delta$  -41.1. HRMS (ESI) calcd for  $\text{C}_{26}\text{H}_{38}\text{BP}_2^+ [\text{M}+\text{H}]^+$  423.2536, found 423.2528.

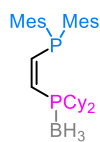

**(10r)** White solid (m.p.: 98 - 100 °C); 20% yield;  $^1\text{H NMR}$  (400 MHz,  $\text{CDCl}_3$ )  $\delta$  7.64 (dd,  $J = 35.2, 14.2$  Hz, 1H), 6.80 (d,  $J = 2.7$  Hz, 4H), 6.23 (ddd,  $J = 31.2, 14.2, 11.4$  Hz, 1H), 2.30 (s, 12H), 2.24 (s, 6H), 1.97 – 1.89 (m, 2H), 1.82 – 1.64 (m, 10H), 1.31 – 1.27 (m, 4H), 1.18 – 1.11 (m, 6H), 0.88 – 0.44 (m, 3H);  $^{13}\text{C NMR}$  (101 MHz,  $\text{CDCl}_3$ )  $\delta$  154.4 (d,  $J = 23.1$  Hz), 142.5 (d,  $J = 15.2$  Hz), 138.2, 132.4 (d,  $J = 19.1$  Hz), 130.7 - 129.9 (m), 33.2 (dd,  $J = 33.5, 3.8$  Hz), 27.0, 26.9, 26.8, 26.7, 25.9, 23.6, 23.5, 20.8;  $^{31}\text{P NMR}$  (162 MHz,  $\text{CDCl}_3$ )  $\delta$  22.5, -36.7;  $^{11}\text{B NMR}$  (128 MHz,  $\text{CDCl}_3$ )  $\delta$  -41.7. HRMS (ESI) calcd for  $\text{C}_{32}\text{H}_{47}\text{P}_2^+ [\text{M}-\text{BH}_2]^+$  493.3148, found 493.3158.

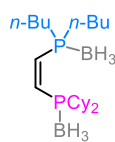

**(10s)** White solid (m.p.: 121 - 123 °C); 70% yield;  $^1\text{H NMR}$  (400 MHz,  $\text{CDCl}_3$ )  $\delta$  6.88 – 6.51 (m, 2H), 2.10 – 1.70 (m, 16H), 1.60 – 1.33 (m, 12H), 1.28 – 1.16 (m, 6H), 0.92 – 0.16 (m, 12H);  $^{13}\text{C NMR}$  (101 MHz,  $\text{CDCl}_3$ )  $\delta$  143.0 (d,  $J = 40.6$  Hz), 138.8 (dd,  $J = 38.2, 3.7$  Hz), 33.8 (d,  $J = 34.4$  Hz), 26.9 – 26.6 (m), 25.9 (d,  $J = 1.1$  Hz), 25.2 (d,  $J = 1.5$  Hz), 25.2 (d,  $J = 35.4$  Hz), 24.2 (d,  $J = 14.1$  Hz), 13.7;  $^{31}\text{P NMR}$  (162 MHz,  $\text{CDCl}_3$ )  $\delta$  21.1, 10.5 (d,  $J = 59.0$  Hz);  $^{11}\text{B NMR}$  (193 MHz,  $\text{CDCl}_3$ )  $\delta$  -38.3, -40.9. HRMS (ESI) calcd for  $\text{C}_{22}\text{H}_{49}\text{B}_2\text{P}_2^+ [\text{M}+\text{Na}]^+$  419.3310, found 419.3331.

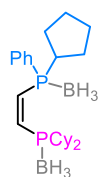

**(10t)** White solid (m.p.: 149 - 151 °C); 60% yield;  $^1\text{H NMR}$  (400 MHz,  $\text{CDCl}_3$ )  $\delta$  7.73 (t,  $J = 8.9$  Hz, 2H), 7.49 (t,  $J = 7.1$  Hz, 1H), 7.43 (t,  $J = 7.5$  Hz, 2H), 7.12 – 6.98 (m, 1H), 6.78 – 6.62 (m, 1H), 2.67 – 2.58 (m, 1H), 2.41 – 2.32 (m, 1H), 2.06 – 1.97 (m, 1H), 1.93 – 1.86 (m, 1H), 1.76 – 1.54 (m, 14H), 1.49 – 1.17 (m, 11H), 1.13 – 0.00 (m, 8H);  $^{13}\text{C NMR}$  (101 MHz,  $\text{CDCl}_3$ )  $\delta$  141.5 (d,  $J = 39.5$  Hz), 139.5 (dd,  $J = 45.0, 3.5$  Hz), 132.7 (d,  $J = 8.7$  Hz), 131.6 (d,  $J = 2.4$  Hz), 129.0 (d,  $J = 53.1$  Hz), 128.8 (d,  $J = 9.9$  Hz), 37.2 (d,  $J = 40.5$  Hz), 33.1 (dd,  $J = 32.0, 29.4$  Hz), 27.8 (d,  $J = 2.2$  Hz), 27.7, 27.54 (d,  $J = 1.9$  Hz), 27.45 (d,  $J = 1.5$  Hz), 27.3, 27.0, 26.7 – 26.3 (m), 25.9 – 25.6 (m);  $^{31}\text{P NMR}$  (162 MHz,  $\text{CDCl}_3$ )  $\delta$  23.8 (d,  $J = 41.9$  Hz), 15.0;  $^{11}\text{B NMR}$  (193 MHz,  $\text{CDCl}_3$ )  $\delta$  -40.2, -42.1. HRMS (ESI) calcd for  $\text{C}_{25}\text{H}_{42}\text{BP}_2^+ [\text{M}+\text{H}]^+$  415.2849, found 415.2841.

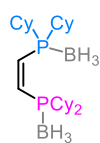

**(10u)** White solid (m.p.: 106 - 108 °C); 62% yield;  $^1\text{H NMR}$  (400 MHz,  $\text{CDCl}_3$ )  $\delta$  6.74 – 6.63 (m, 2H), 2.33 – 2.24 (m, 4H), 1.89 – 1.70 (m, 20H), 1.44 – 1.15 (m, 20H), 0.87 – 0.44 (m, 6H);  $^{13}\text{C NMR}$  (101 MHz,  $\text{CDCl}_3$ )  $\delta$  140.1 (d,  $J = 37.6$  Hz), 33.8 (d,  $J = 32.9$  Hz), 27.4, 27.3, 26.7 – 26.5 (m), 25.8;  $^{31}\text{P NMR}$  (162 MHz,  $\text{CDCl}_3$ )  $\delta$  21.6;  $^{11}\text{B NMR}$  (128 MHz,  $\text{CDCl}_3$ )  $\delta$  -41.0. HRMS (ESI) calcd for  $\text{C}_{26}\text{H}_{50}\text{BP}_2^+ [\text{M}-\text{BH}_2]^+$  435.3476, found 435.3480.



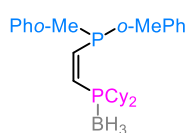

**(10v)** White solid (m.p.: 97 - 99 °C); 57% yield;  $^1\text{H NMR}$  (400 MHz,  $\text{CDCl}_3$ )  $\delta$  7.38 – 7.15 (m, 9H), 6.56 (dt,  $J = 30.6, 13.8$  Hz, 1H), 2.47 (s, 6H), 2.18 – 2.09 (m, 2H), 1.93 – 1.66 (m, 10H), 1.45 – 1.09 (m, 10H), 0.97 – 0.24 (m, 3H);  $^{13}\text{C NMR}$  (101 MHz,  $\text{CDCl}_3$ )  $\delta$  151.4 (d,  $J = 20.8$  Hz), 142.2 (d,  $J = 26.5$  Hz), 136.7 (d,  $J = 11.6$  Hz), 135.3 (dd,  $J = 43.1, 27.4$  Hz), 132.3, 130.3 (d,  $J = 4.8$  Hz), 128.9, 126.2 (d,  $J = 0.7$  Hz), 33.5 (dd,  $J = 33.2, 5.4$  Hz), 27.1 – 26.7 (m), 25.9 (d,  $J = 1.1$  Hz), 21.5 (d,  $J = 20.9$  Hz);  $^{31}\text{P NMR}$  (162 MHz,  $\text{CDCl}_3$ )  $\delta$  23.8, -43.3;  $^{11}\text{B NMR}$  (128 MHz,  $\text{CDCl}_3$ )  $\delta$  -41.4. HRMS (ESI) calcd for  $\text{C}_{28}\text{H}_{42}\text{BP}_2^+$   $[\text{M}+\text{H}]^+$  451.2849, found 451.2847.

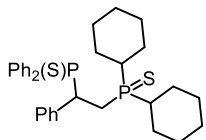

**(10aa)** White solid (m.p.: 220 - 222 °C); 61% yield;  $^1\text{H NMR}$  (400 MHz,  $\text{CDCl}_3$ )  $\delta$  8.37 – 8.33 (m, 2H), 7.57 (s, 3H), 7.47 – 7.15 (m, 10H), 5.01 – 4.92 (m, 1H), 2.61 – 2.55 (m, 1H), 2.17 – 2.07 (m, 1H), 1.73 – 1.43 (m, 10H), 1.28 – 1.11 (m, 6H), 1.02 – 0.82 (m, 3H), 0.73 – 0.56 (m, 3H);  $^{13}\text{C NMR}$  (101 MHz,  $\text{CDCl}_3$ )  $\delta$  134.6 (d,  $J = 4.0$  Hz), 132.7 (d,  $J = 9.2$  Hz), 131.9 (d,  $J = 2.8$  Hz), 131.5 (d,  $J = 80.0$  Hz), 131.3 (d,  $J = 9.7$  Hz), 131.1 (d,  $J = 2.8$  Hz), 130.6 (br), 130.4 (d,  $J = 76.9$  Hz), 128.9 (d,  $J = 11.7$  Hz), 128.0 – 127.8 (m), 127.8 (d,  $J = 3.0$  Hz), 40.2 (d,  $J = 50.4$  Hz), 39.0 (d,  $J = 45.2$  Hz), 37.1 (d,  $J = 47.8$  Hz), 26.9 (d,  $J = 13.5$  Hz), 26.5 (d,  $J = 13.2$  Hz), 26.3 – 26.1 (m), 25.6 (d,  $J = 14.1$  Hz), 25.3 (d,  $J = 3.3$  Hz), 24.6 (dd,  $J = 41.4, 2.8$  Hz);  $^{31}\text{P NMR}$  (162 MHz,  $\text{CDCl}_3$ )  $\delta$  64.0 (d,  $J = 50.6$  Hz), 53.9 (d,  $J = 50.5$  Hz). HRMS (ESI) calcd for  $\text{C}_{32}\text{H}_{41}\text{P}_2\text{S}_2^+$   $[\text{M}+\text{H}]^+$  551.2119, found 551.2127.

## 12. DFT calculation

### 12.1 Computational details

All calculations were implemented in Gaussian 16C. Geometries are optimized in implicit IEFPCM(CHCl<sub>3</sub>) solvent at M06-2X/def2-SVP level of theory. Minima and transition structures on the potential energy surface (PES) were confirmed as such by harmonic frequency analysis, showing respectively zero or one imaginary frequency at the same level of theory. The Gibbs energies were further corrected with IEFPCM(CHCl<sub>3</sub>)-M06-2X/def2-TZVP single-point energy evaluations. The final IEFPCM (CHCl<sub>3</sub>)-M06-2X/def2- TZVP// IEFPCM (CHCl<sub>3</sub>)-M06-2X/def2-SVP free energies are used for discussion of reaction mechanisms throughout the main text and these supplementary materials. The molecular structures were visualized using PyMOL software.

### 12.2 Cartesian coordinates of optimized structures.

#### Ph<sub>2</sub>PHO

|   |             |             |             |
|---|-------------|-------------|-------------|
| P | -0.03139300 | 1.20954700  | -0.74634300 |
| C | -1.44620500 | 0.17790300  | -0.25741700 |
| C | -1.50647000 | -1.19604600 | -0.51585100 |
| C | -2.50129800 | 0.81747300  | 0.39802100  |
| C | -2.62659700 | -1.92528800 | -0.12336300 |
| H | -0.67745700 | -1.70356000 | -1.01564100 |
| C | -3.62066400 | 0.08292400  | 0.79110900  |
| H | -2.42869700 | 1.88875300  | 0.59564800  |
| C | -3.68311400 | -1.28523400 | 0.52925200  |
| H | -2.67510100 | -2.99665900 | -0.32268300 |
| H | -4.44500300 | 0.58043000  | 1.30406800  |
| H | -4.55831700 | -1.85939000 | 0.83732300  |
| C | 1.46138400  | 0.31358800  | -0.24533000 |
| C | 2.03487100  | -0.67804500 | -1.04735700 |
| C | 2.03408500  | 0.64070800  | 0.98815400  |
| C | 3.16721100  | -1.36023600 | -0.60296000 |
| H | 1.60824200  | -0.91367500 | -2.02603200 |
| C | 3.16752600  | -0.04108600 | 1.42708800  |
| H | 1.59119800  | 1.43723800  | 1.59003600  |
| C | 3.72977000  | -1.04321900 | 0.63416700  |
| H | 3.61666400  | -2.13377300 | -1.22701800 |
| H | 3.61702000  | 0.21240500  | 2.38818000  |
| H | 4.61791000  | -1.57494800 | 0.97897200  |
| O | -0.13293900 | 2.60134400  | -0.20011700 |
| H | 0.00495300  | 1.08856000  | -2.15985000 |

#### Syn-Tf<sub>2</sub>O

|   |             |             |             |
|---|-------------|-------------|-------------|
| O | -0.02104000 | -0.65166600 | 0.69442000  |
| S | 1.57864900  | -0.82962000 | 0.31415100  |
| O | 2.23749100  | -1.03493200 | 1.56501500  |
| O | 1.70178700  | -1.68783300 | -0.82428100 |
| C | 1.87903200  | 0.92630100  | -0.21071600 |
| F | 1.58989400  | 1.72064000  | 0.79198700  |
| F | 1.11558200  | 1.20043800  | -1.24224400 |
| F | 3.14503200  | 1.03772800  | -0.53461300 |
| S | -1.32552100 | -0.84761200 | -0.31399500 |
| O | -0.90787600 | -0.70581000 | -1.67696300 |
| O | -2.08786500 | -1.94812000 | 0.18640100  |
| C | -2.13428000 | 0.73540000  | 0.22798300  |
| F | -1.28940400 | 1.72336800  | 0.03456400  |
| F | -2.45320500 | 0.64653700  | 1.49461400  |
| F | -3.20773500 | 0.90377800  | -0.50684500 |

#### Ph-C≡CH-P(O)Ph<sub>2</sub>

|   |             |             |             |
|---|-------------|-------------|-------------|
| C | 3.99478800  | 1.23370600  | 0.07508300  |
| C | 3.30407400  | 0.01698500  | 0.19949400  |
| C | 3.99764500  | -1.19735000 | 0.06777300  |
| C | 5.36602000  | -1.18930400 | -0.18480900 |
| C | 6.04941000  | 0.02173200  | -0.30789600 |
| C | 5.36310800  | 1.23041500  | -0.17805100 |
| H | 3.45037500  | 2.17272300  | 0.18035200  |
| H | 3.45522000  | -2.13814900 | 0.16680500  |
| H | 5.90285000  | -2.13333700 | -0.28527500 |
| H | 7.12234200  | 0.02356700  | -0.50502200 |
| H | 5.89770200  | 2.17626200  | -0.27320000 |
| C | 1.89284700  | 0.01378600  | 0.46186600  |
| C | 0.69655200  | 0.01014800  | 0.68379800  |
| P | -1.04117300 | -0.01232400 | 1.04054900  |
| O | -1.41273200 | -0.05482000 | 2.49038500  |
| C | -1.65120000 | -1.46447200 | 0.13745500  |
| C | -1.35379600 | -1.69475800 | -1.21038500 |
| C | -2.46155700 | -2.35580700 | 0.84441400  |
| C | -1.87335200 | -2.81758200 | -1.84946200 |
| H | -0.71159700 | -1.00340500 | -1.76172300 |
| C | -2.97932200 | -3.47988800 | 0.19938300  |
| H | -2.67407400 | -2.15784500 | 1.89663300  |
| C | -2.68644300 | -3.70882600 | -1.14430100 |
| H | -1.64293200 | -3.00091000 | -2.89975800 |
| H | -3.61132500 | -4.17885400 | 0.74900100  |
| H | -3.09135600 | -4.58820400 | -1.64757700 |
| C | -1.67863200 | 1.46074100  | 0.19490400  |
| C | -2.77919800 | 2.08904200  | 0.78615500  |
| C | -1.14037800 | 1.95604200  | -0.99757100 |
| C | -3.35086800 | 3.20415600  | 0.17466800  |
| H | -3.17049800 | 1.70169000  | 1.72892100  |
| C | -1.71643900 | 3.07033300  | -1.60519100 |
| H | -0.26119500 | 1.48471000  | -1.44346300 |
| C | -2.82205600 | 3.69134300  | -1.02090300 |
| H | -4.20794300 | 3.69715000  | 0.63550200  |
| H | -1.29661500 | 3.46014600  | -2.53341600 |
| H | -3.26873200 | 4.56524000  | -1.49762800 |

#### H<sub>2</sub>O

|   |            |            |             |
|---|------------|------------|-------------|
| O | 0.00000000 | 0.00000000 | 0.11992200  |
| H | 0.00000000 | 0.75468900 | -0.47969000 |

|            |             |             |             |            |             |             |             |
|------------|-------------|-------------|-------------|------------|-------------|-------------|-------------|
| H          | 0.00000000  | -0.75468900 | -0.47969000 | C          | -1.45071600 | -0.90442000 | 2.23176700  |
| <b>TS1</b> |             |             |             | C          | 1.07019900  | -2.03386700 | 2.73401000  |
| P          | 1.48469900  | 0.56447600  | -0.96606700 | H          | 1.42788100  | -1.83033900 | 0.61284300  |
| C          | 3.21881800  | 0.13431000  | -0.82937400 | C          | -1.09092200 | -1.26289300 | 3.52551100  |
| C          | 4.18290000  | 1.14106500  | -0.68777000 | H          | -2.43116400 | -0.47000800 | 2.03260300  |
| C          | 3.58885300  | -1.21307700 | -0.88519600 | C          | 0.16626400  | -1.82109800 | 3.77471900  |
| C          | 5.52693100  | 0.78963000  | -0.60355500 | H          | 2.04696400  | -2.47675000 | 2.92956000  |
| H          | 3.89033000  | 2.19260200  | -0.63621200 | H          | -1.79425100 | -1.10824500 | 4.34380000  |
| C          | 4.93749500  | -1.55278900 | -0.79446200 | H          | 0.43997500  | -2.09831000 | 4.79378900  |
| H          | 2.82662500  | -1.98643000 | -0.99081300 | O          | -0.86833100 | 0.92073100  | -0.86292500 |
| C          | 5.90162500  | -0.55497000 | -0.65596400 | H          | 0.05744900  | -1.20453800 | -1.34734500 |
| H          | 6.28373000  | 1.56659300  | -0.49258400 | S          | 2.58449000  | -0.28005900 | -1.41049300 |
| H          | 5.23305600  | -2.60155700 | -0.83141900 | O          | 3.10944800  | 0.50847000  | -2.51423900 |
| H          | 6.95596900  | -0.82576200 | -0.58559500 | O          | 1.98159600  | -1.58186100 | -1.77179000 |
| C          | 1.02699900  | 1.69163300  | 0.34797700  | O          | 1.78567800  | 0.44555800  | -0.40657500 |
| C          | 0.05178700  | 2.66983200  | 0.10883400  | S          | -1.53996800 | 2.17097500  | -0.07681200 |
| C          | 1.65294400  | 1.59190800  | 1.59825300  | O          | -1.88425000 | 3.14056000  | -1.07114500 |
| C          | -0.29713900 | 3.54676900  | 1.13161000  | O          | -2.47612800 | 1.65470000  | 0.88777300  |
| H          | -0.44644700 | 2.72536400  | -0.85965500 | C          | 4.09170000  | -0.77557400 | -0.46863400 |
| C          | 1.29533100  | 2.47614500  | 2.61154500  | C          | -0.03214500 | 2.75954700  | 0.83570300  |
| H          | 2.40419800  | 0.82164800  | 1.77928300  | F          | 0.87737200  | 3.13655300  | -0.01967200 |
| C          | 0.32229400  | 3.44930500  | 2.37826500  | F          | 0.40108300  | 1.79002600  | 1.60337500  |
| H          | -1.05939500 | 4.30593300  | 0.95428000  | F          | -0.41686900 | 3.78084000  | 1.57371100  |
| H          | 1.77560000  | 2.40194400  | 3.58742200  | F          | 4.72908200  | 0.29465700  | -0.01622200 |
| H          | 0.04370600  | 4.13830300  | 3.17694800  | F          | 3.76426800  | -1.53632100 | 0.57628200  |
| O          | 0.66407700  | -0.79735900 | -1.07734800 | F          | 4.91951200  | -1.46633500 | -1.23916600 |
| H          | 1.22413600  | 1.20719700  | -2.18256900 | <b>TS2</b> |             |             |             |
| S          | -2.03849100 | 0.03800600  | -1.30695300 | P          | -0.72563200 | -0.83514300 | -0.16185300 |
| O          | -2.45494500 | -1.20970200 | -1.90980400 | C          | -2.31794400 | -1.57345000 | -0.55461100 |
| O          | -1.33887900 | 1.01795700  | -2.13110600 | C          | -2.79635100 | -2.61889200 | 0.24681100  |
| O          | -1.37915100 | -0.14779200 | 0.05725500  | C          | -3.03658100 | -1.15559700 | -1.68107700 |
| S          | 0.04212500  | -1.73889800 | 0.33337700  | C          | -4.00093200 | -3.23701000 | -0.07857700 |
| O          | -0.03706800 | -2.96289100 | -0.42978700 | H          | -2.23850000 | -2.94669100 | 1.12691400  |
| O          | 1.08666800  | -1.33608200 | 1.26215200  | C          | -4.24375700 | -1.77696100 | -1.99287900 |
| C          | -3.57190000 | 0.89238400  | -0.74393500 | H          | -2.66569300 | -0.34793000 | -2.31474500 |
| C          | -1.34876300 | -2.08496300 | 1.56846200  | C          | -4.72406200 | -2.81522500 | -1.19512000 |
| F          | -2.47781800 | -2.31243500 | 0.94732400  | H          | -4.37717900 | -4.04769100 | 0.54588800  |
| F          | -1.46609800 | -1.10113900 | 2.42274700  | H          | -4.80915300 | -1.44634700 | -2.86445200 |
| F          | -0.97364200 | -3.17643400 | 2.21067200  | H          | -5.66966200 | -3.29851100 | -1.44388000 |
| F          | -4.22300900 | 0.13058500  | 0.11455900  | C          | -0.65846700 | -0.48206000 | 1.58953100  |
| F          | -3.25989700 | 2.03904300  | -0.16212900 | C          | 0.60091400  | -0.53535800 | 2.20491300  |
| F          | -4.34562400 | 1.13428600  | -1.78760700 | C          | -1.80971200 | -0.18525100 | 2.33597400  |
| <b>I</b>   |             |             |             | C          | 0.70735300  | -0.27815500 | 3.56884000  |
| P          | -0.92731900 | -0.68448400 | -0.48581200 | H          | 1.48898700  | -0.75664100 | 1.61444600  |
| C          | -2.60654300 | -1.15937800 | -0.87809300 | C          | -1.68931400 | 0.07108400  | 3.69726700  |
| C          | -3.12089200 | -2.34954600 | -0.34647700 | H          | -2.78633100 | -0.14641500 | 1.85191000  |
| C          | -3.37445300 | -0.36934000 | -1.74396700 | C          | -0.43415700 | 0.02689700  | 4.30998000  |
| C          | -4.41187800 | -2.74579500 | -0.68555000 | H          | 1.68468000  | -0.31604300 | 4.05017100  |
| H          | -2.52325100 | -2.96132800 | 0.33208800  | H          | -2.57755800 | 0.30740500  | 4.28355800  |
| C          | -4.66620200 | -0.77333800 | -2.06867700 | H          | -0.34766000 | 0.23017700  | 5.37839400  |
| H          | -2.97496000 | 0.55772400  | -2.15918400 | O          | -0.72614300 | 0.57451300  | -1.06563500 |
| C          | -5.18162800 | -1.95865900 | -1.54265800 | H          | 0.58608500  | -1.46972900 | -0.70242300 |
| H          | -4.81851400 | -3.66933300 | -0.27322000 | S          | 2.71404600  | -0.50881400 | -1.15273800 |
| H          | -5.27123200 | -0.15818300 | -2.73483500 | O          | 3.31715400  | -0.15177300 | -2.41904400 |
| H          | -6.19464800 | -2.27015200 | -1.80027200 | O          | 1.85752200  | -1.75009800 | -1.20087600 |
| C          | -0.52658900 | -1.09942000 | 1.19186500  | O          | 2.07377700  | 0.54290900  | -0.36099700 |
| C          | 0.73031400  | -1.67254900 | 1.43392400  | S          | -1.58941300 | 1.92020500  | -0.86221800 |
|            |             |             |             | O          | -1.87237800 | 2.43954200  | -2.16788800 |

|              |             |             |             |              |             |             |             |
|--------------|-------------|-------------|-------------|--------------|-------------|-------------|-------------|
| O            | -2.60744800 | 1.69358600  | 0.13056400  | C            | 1.14628200  | 3.84254100  | -2.54578700 |
| C            | 4.12138900  | -1.08214300 | -0.10855000 | H            | 1.54847000  | 1.72208000  | -2.49376600 |
| C            | -0.25660900 | 2.95922800  | -0.09796800 | C            | -0.24153800 | 4.71174400  | -0.76974000 |
| F            | 0.70615900  | 3.13616200  | -0.96508000 | H            | -0.94182000 | 3.26865900  | 0.67508400  |
| F            | 0.18875000  | 2.35754400  | 0.98043500  | C            | 0.50712800  | 4.91772000  | -1.92935300 |
| F            | -0.79805300 | 4.11591700  | 0.22426700  | H            | 1.73407500  | 3.99918100  | -3.45121800 |
| F            | 4.98761700  | -0.09701100 | 0.05815100  | H            | -0.73934800 | 5.55083100  | -0.28155200 |
| F            | 3.67967200  | -1.46473600 | 1.08597400  | H            | 0.59476400  | 5.91984800  | -2.35160100 |
| F            | 4.73494900  | -2.10440400 | -0.67873600 | O            | 2.21308300  | 0.65781600  | 0.09204500  |
|              |             |             |             | S            | 3.45161500  | 0.68676900  | -0.77467100 |
| <b>II</b>    |             |             |             | O            | 3.28339000  | 0.03555700  | -2.06609900 |
| P            | 0.65886800  | 0.42837100  | -1.51438500 | O            | 4.13928900  | 1.96425600  | -0.74115100 |
| C            | 2.17353500  | 0.07259400  | -0.55115600 | C            | 4.53277500  | -0.46113300 | 0.19205300  |
| C            | 3.00034500  | 1.13795700  | -0.17051000 | F            | 3.85242500  | -1.53118800 | 0.58211700  |
| C            | 2.60156900  | -1.24234100 | -0.32944300 | F            | 5.01677600  | 0.14925500  | 1.26153900  |
| C            | 4.22610500  | 0.89008500  | 0.44569000  | F            | 5.54612100  | -0.85707000 | -0.56368900 |
| H            | 2.68488900  | 2.16980100  | -0.34420900 | C            | 1.88623300  | 0.20716600  | 2.89985600  |
| C            | 3.82535900  | -1.48497900 | 0.29165100  | C            | 1.03759800  | -0.84787500 | 2.54131300  |
| H            | 1.98025700  | -2.08814800 | -0.63245900 | C            | 1.40315800  | -2.17114200 | 2.83302200  |
| C            | 4.63929200  | -0.42114800 | 0.68062200  | C            | 2.60718400  | -2.43059900 | 3.48255200  |
| H            | 4.85761600  | 1.72702800  | 0.74689300  | C            | 3.44202600  | -1.37622200 | 3.85175500  |
| H            | 4.14285500  | -2.51295100 | 0.47142100  | C            | 3.07707000  | -0.05912800 | 3.56558100  |
| H            | 5.59656500  | -0.61415600 | 1.16667000  | H            | 1.61041600  | 1.22887700  | 2.63599000  |
| C            | -0.20742700 | 1.68289300  | -0.50792200 | H            | 0.73427400  | -2.98509600 | 2.54856000  |
| C            | -1.15437700 | 2.44971200  | -1.20231500 | H            | 2.89284500  | -3.46011600 | 3.70208700  |
| C            | -0.01057000 | 1.90440000  | 0.86343500  | H            | 4.38595500  | -1.58065400 | 4.35928600  |
| C            | -1.91465000 | 3.40805100  | -0.53411000 | H            | 3.73595400  | 0.76391500  | 3.84387000  |
| H            | -1.29997500 | 2.29044400  | -2.27369200 | C            | -0.25233000 | -0.61601100 | 1.91418000  |
| C            | -0.76542400 | 2.86829900  | 1.52608800  | C            | -1.49159800 | -0.89392600 | 1.88676900  |
| H            | 0.72148100  | 1.31109000  | 1.41192900  | P            | -2.50755300 | -0.24553100 | 0.64549300  |
| C            | -1.71973300 | 3.61485800  | 0.83074700  | O            | -1.66213400 | 0.81734000  | -0.17504900 |
| H            | -2.65384600 | 3.99561100  | -1.07989200 | C            | -3.93902800 | 0.63272800  | 1.27185800  |
| H            | -0.61279400 | 3.03526300  | 2.59315700  | C            | -4.83320300 | -0.03157400 | 2.12031900  |
| H            | -2.31114100 | 4.36570500  | 1.35722500  | C            | -4.15401700 | 1.96325000  | 0.90058800  |
| O            | -0.25533500 | -1.01673500 | -1.15752000 | C            | -5.94930500 | 0.64727900  | 2.60060200  |
| S            | -0.66803700 | -1.70310200 | 0.20997500  | H            | -4.65488800 | -1.07051500 | 2.40787000  |
| O            | -0.55583700 | -3.12897000 | 0.04639200  | C            | -5.27758300 | 2.63277800  | 1.38522800  |
| O            | -0.10946800 | -1.02337800 | 1.35221300  | H            | -3.44501100 | 2.46355300  | 0.23873600  |
| C            | -2.47373300 | -1.30826500 | 0.17973700  | C            | -6.17018900 | 1.97672200  | 2.23211000  |
| F            | -3.01929400 | -1.80599000 | -0.90966000 | H            | -6.64869600 | 0.13948600  | 3.26542500  |
| F            | -2.64580100 | -0.00249500 | 0.20721300  | H            | -5.45362500 | 3.67064700  | 1.10062400  |
| F            | -3.03012200 | -1.85103300 | 1.24415400  | H            | -7.04651800 | 2.50481200  | 2.61060100  |
|              |             |             |             | C            | -3.04188400 | -1.55734400 | -0.46034500 |
|              |             |             |             | C            | -4.06295800 | -1.28956800 | -1.38065200 |
|              |             |             |             | C            | -2.36986100 | -2.78357000 | -0.47570200 |
|              |             |             |             | C            | -4.40776900 | -2.25616700 | -2.32183500 |
| <b>a_TS3</b> |             |             |             | H            | -4.58698500 | -0.33080900 | -1.36227700 |
| P            | 0.14097100  | 0.69842000  | -0.07821100 | C            | -2.72172600 | -3.74477100 | -1.42101200 |
| C            | 0.22846400  | -0.57777700 | -1.38664900 | H            | -1.57038100 | -2.97900700 | 0.24235300  |
| C            | 0.97795300  | -1.73491200 | -1.15389000 | C            | -3.73640100 | -3.48031000 | -2.34132600 |
| C            | -0.55225300 | -0.47371800 | -2.54310300 | H            | -5.20266900 | -2.05477300 | -3.04069700 |
| C            | 0.94736700  | -2.78095600 | -2.07398500 | H            | -2.19748100 | -4.70091500 | -1.44132900 |
| H            | 1.59644600  | -1.80923700 | -0.25677100 | H            | -4.00870200 | -4.23548900 | -3.08017100 |
| C            | -0.57165200 | -1.51714400 | -3.46675600 |              |             |             |             |
| H            | -1.15395000 | 0.42175700  | -2.71428700 | <b>b_TS3</b> |             |             |             |
| C            | 0.17566800  | -2.67203200 | -3.23088400 | P            | 1.09124500  | 0.33065000  | 0.10955400  |
| H            | 1.53521200  | -3.68120800 | -1.88915600 | C            | 0.44699100  | 1.97524600  | -0.35198000 |
| H            | -1.17761500 | -1.43044400 | -4.36998200 | C            | -0.42748900 | 2.71499500  | 0.44943100  |
| H            | 0.15518600  | -3.49084000 | -3.95208900 | C            | 0.87857600  | 2.48236200  | -1.58414800 |
| C            | 0.28906500  | 2.35327500  | -0.84876600 |              |             |             |             |
| C            | 1.04300000  | 2.55990800  | -2.00731000 |              |             |             |             |
| C            | -0.35267100 | 3.43161800  | -0.23031900 |              |             |             |             |

|   |             |             |             |              |             |             |             |
|---|-------------|-------------|-------------|--------------|-------------|-------------|-------------|
| C | -0.88360900 | 3.95670200  | 0.00537000  | H            | -2.17187100 | 0.75005700  | -2.15373100 |
| H | -0.77952800 | 2.31017300  | 1.40207100  | C            | -4.21354200 | 3.46409600  | -1.90057100 |
| C | 0.40649900  | 3.71640500  | -2.02580700 | H            | -5.21473300 | 4.11600200  | -0.10053300 |
| H | 1.59545100  | 1.91632100  | -2.18479800 | H            | -3.08884700 | 2.59795100  | -3.52956100 |
| C | -0.47550700 | 4.45249500  | -1.23189900 | H            | -4.60335400 | 4.28409200  | -2.50565500 |
| H | -1.57581600 | 4.52820900  | 0.62556200  |              |             |             |             |
| H | 0.73599100  | 4.10808900  | -2.98907400 | <b>b_III</b> |             |             |             |
| H | -0.84346000 | 5.41928800  | -1.57925000 | P            | 0.38914200  | 0.41626700  | 0.52188300  |
| C | 0.93785100  | 0.04627400  | 1.90718900  | C            | 0.76872700  | 1.46243300  | -0.88171400 |
| C | 0.61287900  | -1.22560800 | 2.39262500  | C            | 0.83620600  | 2.84597500  | -0.69657800 |
| C | 1.24300400  | 1.07685700  | 2.80181200  | C            | 0.90436800  | 0.89373300  | -2.15122700 |
| C | 0.55989200  | -1.45261300 | 3.76543800  | C            | 1.04383400  | 3.66856900  | -1.80197500 |
| H | 0.39309700  | -2.04333900 | 1.70342200  | H            | 0.72865400  | 3.28073300  | 0.29969200  |
| C | 1.17957300  | 0.84417200  | 4.17483900  | C            | 1.10835700  | 1.72592800  | -3.24836900 |
| H | 1.53631900  | 2.05876400  | 2.42752500  | H            | 0.88185400  | -0.19086900 | -2.27885800 |
| C | 0.83313100  | -0.41645300 | 4.65860700  | C            | 1.17737900  | 3.10948500  | -3.07294600 |
| H | 0.30331100  | -2.44533900 | 4.13751200  | H            | 1.10144500  | 4.74919700  | -1.66812300 |
| H | 1.40590200  | 1.65516500  | 4.86815800  | H            | 1.23019900  | 1.29081800  | -4.24070100 |
| H | 0.78322600  | -0.59446800 | 5.73365600  | H            | 1.34524000  | 3.75678400  | -3.93487700 |
| O | 2.91582600  | 1.18707200  | 0.43737100  | C            | 1.04015100  | 0.98497700  | 2.09657600  |
| S | 4.09317200  | 0.86001300  | -0.46711100 | C            | 0.15146100  | 1.06075600  | 3.17709500  |
| O | 3.66848900  | 0.48827700  | -1.81142000 | C            | 2.37209700  | 1.40308100  | 2.22411800  |
| O | 5.18198300  | 1.79591100  | -0.30501100 | C            | 0.61227800  | 1.53282500  | 4.40491600  |
| C | 4.66680000  | -0.71922800 | 0.29407600  | H            | -0.89929000 | 0.77922300  | 3.06113400  |
| F | 3.64977300  | -1.57299000 | 0.35686000  | C            | 2.81154000  | 1.88343300  | 3.45485600  |
| F | 5.11869300  | -0.50425100 | 1.51507400  | H            | 3.05380600  | 1.35117300  | 1.37459600  |
| F | 5.62726000  | -1.25407800 | -0.43901700 | C            | 1.93895000  | 1.93979300  | 4.54348700  |
| C | -0.62225500 | -3.15047100 | -1.86375300 | H            | -0.07338400 | 1.59090100  | 5.25072400  |
| C | 0.27888200  | -2.10501100 | -1.59699200 | H            | 3.84604800  | 2.21070600  | 3.56341300  |
| C | 1.55951200  | -2.10945800 | -2.16075800 | H            | 2.29501000  | 2.31158700  | 5.50546000  |
| C | 1.93404600  | -3.16222800 | -2.99300000 | O            | 2.54567600  | -0.61173200 | 0.10352700  |
| C | 1.04376500  | -4.20251400 | -3.25912200 | S            | 3.64670700  | -0.27537200 | -0.84545100 |
| C | -0.23418500 | -4.19571400 | -2.69395800 | O            | 3.49830700  | -0.89152900 | -2.16089500 |
| H | -1.61658600 | -3.13362900 | -1.41248700 | O            | 4.05712500  | 1.12568800  | -0.80192400 |
| H | 2.25199400  | -1.29276000 | -1.95042600 | C            | 5.05002100  | -1.18452300 | -0.07580600 |
| H | 2.93089200  | -3.16748400 | -3.43506100 | F            | 5.26450900  | -0.74237000 | 1.15684000  |
| H | 1.34603400  | -5.02493000 | -3.90900800 | F            | 6.15695200  | -1.01136300 | -0.78425300 |
| H | -0.92978600 | -5.01021800 | -2.89902200 | F            | 4.78433500  | -2.48288700 | -0.01797700 |
| C | -0.19596000 | -1.03895600 | -0.73286100 | C            | -1.55328300 | -3.31642400 | 0.16791200  |
| C | -1.04682300 | -0.40884300 | -0.06466900 | C            | -0.43376500 | -2.49923000 | -0.06971400 |
| P | -2.54735800 | 0.11478100  | 0.75822500  | C            | 0.71861600  | -3.03574500 | -0.66659100 |
| O | -2.35088800 | 0.58014900  | 2.16725500  | C            | 0.73545500  | -4.37739400 | -1.03980900 |
| C | -3.58584400 | -1.36556100 | 0.65164500  | C            | -0.37929700 | -5.18489800 | -0.81124000 |
| C | -4.13250900 | -1.80561800 | -0.55934500 | C            | -1.52101200 | -4.65551400 | -0.20347600 |
| C | -3.79768000 | -2.08448100 | 1.83131600  | H            | -2.44028600 | -2.90115100 | 0.64894700  |
| C | -4.88576000 | -2.97714700 | -0.58740700 | H            | 1.58951700  | -2.39836700 | -0.82299500 |
| H | -3.97641700 | -1.23370600 | -1.47788800 | H            | 1.62779400  | -4.79408800 | -1.50788200 |
| C | -4.55339500 | -3.25649500 | 1.79559700  | H            | -0.35798000 | -6.23613600 | -1.10262700 |
| H | -3.37046400 | -1.71406700 | 2.76529400  | H            | -2.38886200 | -5.28927900 | -0.01674000 |
| C | -5.09316400 | -3.70203000 | 0.58903300  | C            | -0.48690400 | -1.08963100 | 0.28368300  |
| H | -5.31753900 | -3.32358100 | -1.52724200 | C            | -1.30535500 | -0.07500500 | 0.60602900  |
| H | -4.72277300 | -3.82185700 | 2.71294400  | P            | -2.99251900 | 0.51930300  | 0.87980400  |
| H | -5.68455000 | -4.61851100 | 0.56362900  | O            | -3.22832300 | 0.92869700  | 2.30374100  |
| C | -3.20530700 | 1.38051100  | -0.35468600 | C            | -4.05727900 | -0.84175900 | 0.34798800  |
| C | -4.05108000 | 2.33145900  | 0.22633000  | C            | -4.12939800 | -1.27329700 | -0.98155000 |
| C | -2.85848600 | 1.47299200  | -1.70673000 | C            | -4.74006700 | -1.53075200 | 1.35540900  |
| C | -4.55780900 | 3.37090300  | -0.55129100 | C            | -4.87311000 | -2.40788000 | -1.29717700 |
| H | -4.28834600 | 2.26476600  | 1.29009200  | H            | -3.60462800 | -0.73518100 | -1.77334700 |
| C | -3.36633100 | 2.51694900  | -2.47780900 | C            | -5.48290500 | -2.66654300 | 1.03239600  |

|   |             |             |             |   |             |             |             |
|---|-------------|-------------|-------------|---|-------------|-------------|-------------|
| H | -4.67347400 | -1.17217700 | 2.38429800  | C | -3.32216600 | 3.79076800  | 1.16348800  |
| C | -5.54319100 | -3.10678100 | -0.29018200 | H | -1.81960400 | 2.27113800  | 1.46077300  |
| H | -4.92789200 | -2.75027500 | -2.33113600 | C | -5.29678100 | 3.11737200  | -0.06758700 |
| H | -6.01442900 | -3.20900900 | 1.81530500  | H | -5.34378400 | 1.06977400  | -0.74768500 |
| H | -6.12071400 | -3.99784600 | -0.54075100 | C | -4.57027300 | 4.09310600  | 0.61548800  |
| C | -3.06526300 | 1.88773900  | -0.30085000 | H | -2.75693500 | 4.55414400  | 1.69881200  |
| C | -3.64030300 | 3.08171600  | 0.14407600  | H | -6.27229600 | 3.35574600  | -0.49231400 |
| C | -2.51296600 | 1.80506500  | -1.58598100 | H | -4.98071900 | 5.09792800  | 0.72388100  |
| C | -3.67529900 | 4.18852400  | -0.70412300 | C | -4.05804900 | -1.34854700 | -0.05183400 |
| H | -4.04146200 | 3.13596700  | 1.15798800  | C | -5.03872500 | -1.43578700 | 0.94530600  |
| C | -2.55031400 | 2.91349700  | -2.42827600 | C | -4.01704900 | -2.26894400 | -1.10390400 |
| H | -2.02517900 | 0.88876700  | -1.92816400 | C | -5.98916100 | -2.44934400 | 0.87755800  |
| C | -3.13229500 | 4.10359800  | -1.98623900 | H | -5.05847500 | -0.71636500 | 1.76726000  |
| H | -4.12091000 | 5.12236700  | -0.35910400 | C | -4.97351100 | -3.28221000 | -1.15961300 |
| H | -2.11192900 | 2.85124400  | -3.42527400 | H | -3.24248800 | -2.18647200 | -1.86799500 |
| H | -3.15484000 | 4.97340000  | -2.64446800 | C | -5.95502800 | -3.37018600 | -0.17342800 |

#### b\_TS4

|   |             |             |             |           |             |             |             |
|---|-------------|-------------|-------------|-----------|-------------|-------------|-------------|
| P | -0.32275700 | -0.15366300 | -0.44674100 | H         | -6.75793300 | -2.52436400 | 1.64713400  |
| C | 0.31370500  | -1.46563500 | -1.50642700 | H         | -4.95019400 | -4.00360900 | -1.97688400 |
| C | -0.08863500 | -1.57969300 | -2.84403200 | H         | -6.70177200 | -4.16398600 | -0.22103300 |
| C | 1.25455800  | -2.35260800 | -0.97332000 | O         | 2.77635500  | 0.07855000  | -0.72787400 |
| C | 0.46108700  | -2.57792900 | -3.64365300 | S         | 3.91485900  | 0.95554900  | -0.38818400 |
| H | -0.83197200 | -0.89610500 | -3.25374100 | O         | 4.36002300  | 1.84677100  | -1.45460800 |
| C | 1.78604500  | -3.35900200 | -1.77559500 | O         | 3.85227500  | 1.53831300  | 0.95880500  |
| H | 1.58648900  | -2.24854900 | 0.05957300  | C         | 5.28588500  | -0.26838200 | -0.22694800 |
| C | 1.39375300  | -3.46858700 | -3.10924100 | F         | 5.47850800  | -0.92589800 | -1.36447700 |
| H | 0.15557300  | -2.66384000 | -4.68693700 | F         | 4.99704600  | -1.16372500 | 0.72014600  |
| H | 2.51775300  | -4.05115100 | -1.35824600 | F         | 6.42510800  | 0.32714700  | 0.10672900  |
| H | 1.81793100  | -4.25287000 | -3.73793800 | <b>IV</b> |             |             |             |
| C | 0.07404300  | 1.57100100  | -0.75615400 | P         | 0.14067600  | -0.13677400 | 0.47872200  |
| C | 0.94772200  | 2.21284800  | 0.12871300  | C         | 0.03767300  | 1.65487500  | 0.82336300  |
| C | -0.47455300 | 2.26131600  | -1.84360600 | C         | 0.73265100  | 2.57809400  | 0.03365900  |
| C | 1.28822400  | 3.54432600  | -0.08717300 | C         | -0.84600400 | 2.10757800  | 1.81183800  |
| H | 1.40001900  | 1.67110500  | 0.96044300  | C         | 0.53127000  | 3.94343100  | 0.22505500  |
| C | -0.13469700 | 3.59751900  | -2.04506600 | H         | 1.42122300  | 2.23333100  | -0.73625600 |
| H | -1.17138300 | 1.76234200  | -2.51666100 | C         | -1.02298300 | 3.47466900  | 2.01327800  |
| C | 0.74501300  | 4.23646400  | -1.17080900 | H         | -1.40526300 | 1.39199800  | 2.41508800  |
| H | 1.99500900  | 4.02970200  | 0.58608700  | C         | -0.34207900 | 4.39342300  | 1.21469600  |
| H | -0.55897300 | 4.14025600  | -2.89035800 | H         | 1.06519900  | 4.65801700  | -0.40257400 |
| H | 1.01357800  | 5.28052300  | -1.33818700 | H         | -1.70460300 | 3.82105500  | 2.79121600  |
| C | 0.01334800  | -1.33070500 | 3.58842200  | H         | -0.49275100 | 5.46365500  | 1.36451100  |
| C | 0.63334500  | -0.92610800 | 2.39618000  | C         | 0.56123100  | -1.23588000 | 1.85821500  |
| C | 2.03023700  | -0.87525000 | 2.30958100  | C         | 1.19750400  | -0.75087100 | 3.00237900  |
| C | 2.80376300  | -1.22873100 | 3.41343700  | C         | 0.20742500  | -2.58488700 | 1.75404600  |
| C | 2.18667300  | -1.63525700 | 4.59623300  | C         | 1.49367100  | -1.63100500 | 4.04330400  |
| C | 0.79054900  | -1.68685300 | 4.68359600  | H         | 1.47568700  | 0.30205500  | 3.08002500  |
| H | -1.07759600 | -1.36048500 | 3.63574300  | C         | 0.52064500  | -3.45841500 | 2.79265000  |
| H | 2.49921200  | -0.54503700 | 1.38274200  | H         | -0.30814300 | -2.95315700 | 0.86296400  |
| H | 3.89076900  | -1.17770200 | 3.34228000  | C         | 1.16268400  | -2.98094200 | 3.93674500  |
| H | 2.79365200  | -1.91246100 | 5.45959700  | H         | 1.99071600  | -1.25676500 | 4.93892200  |
| H | 0.31312800  | -2.00516100 | 5.61124900  | H         | 0.26002100  | -4.51411900 | 2.70908900  |
| C | -0.19901400 | -0.53359900 | 1.25845200  | H         | 1.40536000  | -3.66651600 | 4.74974300  |
| C | -1.54229300 | -0.37884000 | 1.15259000  | O         | 2.01783800  | 0.13325000  | 0.08927500  |
| P | -2.79574200 | -0.07949700 | 0.03760900  | S         | 3.36058200  | 0.16546000  | 0.81624100  |
| O | -1.98141400 | -0.12828500 | -1.34680500 | O         | 3.41158900  | 1.17905300  | 1.85407300  |
| C | -3.52433100 | 1.53240400  | 0.34043200  | O         | 3.87767200  | -1.15916700 | 1.08965400  |
| C | -2.79484600 | 2.50951400  | 1.03009300  | C         | 4.37254300  | 0.84448300  | -0.56792800 |
| C | -4.77602600 | 1.83282600  | -0.21074300 | F         | 3.90348900  | 2.03166100  | -0.92363000 |
|   |             |             |             | F         | 4.34469800  | 0.04041400  | -1.61116600 |

|          |             |             |             |   |             |             |             |
|----------|-------------|-------------|-------------|---|-------------|-------------|-------------|
| F        | 5.62140300  | 0.98252000  | -0.15560800 | C | -3.83174200 | 4.09544000  | -1.78705400 |
| C        | 1.99629800  | -2.11432600 | -1.57787500 | H | -4.65860100 | 4.36334200  | 0.18935600  |
| C        | 1.13011900  | -1.14292800 | -2.09949300 | H | -2.82344300 | 3.61937300  | -3.63891300 |
| C        | 1.33304200  | -0.68836500 | -3.40682300 | H | -4.46441700 | 4.86018100  | -2.23908700 |
| C        | 2.38334600  | -1.18864300 | -4.17591500 | O | -2.64328300 | -0.34410200 | 0.18309300  |
| C        | 3.23228000  | -2.16355500 | -3.65334800 | S | -4.16721700 | -0.21942000 | 0.40322800  |
| C        | 3.03244100  | -2.62733400 | -2.35187000 | O | -4.48389600 | 0.43672000  | 1.65409100  |
| H        | 1.87027700  | -2.46170000 | -0.54988900 | O | -4.85554200 | 0.15546300  | -0.81142800 |
| H        | 0.64834000  | 0.05705800  | -3.81480200 | C | -4.49633300 | -2.01560500 | 0.67109800  |
| H        | 2.53500600  | -0.81785800 | -5.19105900 | F | -3.82544700 | -2.43544100 | 1.73064200  |
| H        | 4.05136400  | -2.55862300 | -4.25641800 | F | -4.12921200 | -2.71528500 | -0.38221100 |
| H        | 3.69617100  | -3.38350200 | -1.92981900 | F | -5.78878100 | -2.17736400 | 0.88082400  |
| C        | -0.05971100 | -0.67154400 | -1.33517600 | C | -2.26572300 | -1.22369500 | -2.44825700 |
| C        | -1.28931400 | -0.57159300 | -1.88034900 | C | -1.11703600 | -1.51180800 | -1.69500000 |
| P        | -2.42352200 | -0.25707800 | -0.59757900 | C | -0.60991100 | -2.81722700 | -1.68582400 |
| O        | -1.57369400 | -0.36806400 | 0.77253600  | C | -1.24113500 | -3.81934500 | -2.42108000 |
| C        | -3.71567700 | -1.49206200 | -0.44725600 | C | -2.37190800 | -3.52359200 | -3.18006700 |
| C        | -4.61941400 | -1.66484100 | -1.50306000 | C | -2.87963300 | -2.22281900 | -3.19463200 |
| C        | -3.80019400 | -2.28028000 | 0.70446800  | H | -2.69611600 | -0.22088400 | -2.43879600 |
| C        | -5.61535800 | -2.63176100 | -1.39870500 | H | 0.27557400  | -3.04812800 | -1.09307900 |
| H        | -4.53962800 | -1.05125900 | -2.40331500 | H | -0.84404400 | -4.83483600 | -2.39828900 |
| C        | -4.80375600 | -3.24435900 | 0.79980300  | H | -2.86381400 | -4.30814100 | -3.75669500 |
| H        | -3.08279000 | -2.13721300 | 1.51435600  | H | -3.77022900 | -1.98648800 | -3.77808200 |
| C        | -5.70719000 | -3.41856000 | -0.24802800 | C | -0.38361300 | -0.44097900 | -0.98062000 |
| H        | -6.32065000 | -2.77455400 | -2.21803300 | C | 0.95626300  | -0.34383400 | -1.03493500 |
| H        | -4.87725000 | -3.86208400 | 1.69555000  | P | 1.64133800  | 1.13135100  | -0.26801300 |
| H        | -6.48926300 | -4.17520800 | -0.17033800 | O | 0.22714800  | 1.86872300  | -0.06546300 |
| C        | -3.16532100 | 1.38089600  | -0.65820800 | C | 2.56056500  | 2.20998900  | -1.36399100 |
| C        | -4.29147500 | 1.67125400  | 0.12083600  | C | 3.96084100  | 2.19699600  | -1.40651300 |
| C        | -2.51541400 | 2.39151900  | -1.37599100 | C | 1.82459300  | 3.09910400  | -2.15911400 |
| C        | -4.76170400 | 2.98116100  | 0.18566900  | C | 4.61958100  | 3.07839400  | -2.25941600 |
| H        | -4.79731000 | 0.87816100  | 0.67677800  | H | 4.51653300  | 1.48909300  | -0.79301600 |
| C        | -2.99010100 | 3.69912100  | -1.30352200 | C | 2.49741600  | 3.97009800  | -3.01216900 |
| H        | -1.63926700 | 2.15177800  | -1.98319000 | H | 0.73590900  | 3.12153000  | -2.09491200 |
| C        | -4.10924900 | 3.99200500  | -0.52245000 | C | 3.89156500  | 3.95817400  | -3.06216400 |
| H        | -5.63852100 | 3.21394800  | 0.79095000  | H | 5.70911800  | 3.07391100  | -2.29877000 |
| H        | -2.48433800 | 4.49084500  | -1.85754900 | H | 1.93008100  | 4.66383200  | -3.63314200 |
| H        | -4.47903600 | 5.01701100  | -0.46764600 | H | 4.41590400  | 4.64325100  | -3.72994700 |
|          |             |             |             | C | 2.38481400  | 0.98818500  | 1.35263300  |
|          |             |             |             | C | 2.90788200  | 2.15387600  | 1.92598700  |
|          |             |             |             | C | 2.29442900  | -0.19750700 | 2.08404800  |
|          |             |             |             | C | 3.34641000  | 2.12394200  | 3.24729900  |
|          |             |             |             | H | 2.97312300  | 3.07900000  | 1.34860500  |
|          |             |             |             | C | 2.73125500  | -0.21331600 | 3.40547100  |
|          |             |             |             | H | 1.90953400  | -1.10730200 | 1.62187400  |
|          |             |             |             | C | 3.25316300  | 0.94286700  | 3.98505700  |
|          |             |             |             | H | 3.76274400  | 3.02438600  | 3.70000400  |
|          |             |             |             | H | 2.67503200  | -1.13897400 | 3.97881900  |
|          |             |             |             | H | 3.59924600  | 0.92182800  | 5.01944600  |
|          |             |             |             | H | 1.59303200  | -1.03183000 | -1.58948200 |
|          |             |             |             | O | 3.65848100  | -0.60978400 | -0.69726600 |
|          |             |             |             | S | 4.45332300  | -1.77170200 | -0.23168400 |
|          |             |             |             | O | 5.56167700  | -2.12537700 | -1.10773600 |
|          |             |             |             | O | 4.70417000  | -1.80772400 | 1.20497300  |
|          |             |             |             | C | 3.25114400  | -3.15379500 | -0.48119700 |
|          |             |             |             | F | 2.80588200  | -3.17565600 | -1.73715800 |
|          |             |             |             | F | 2.18059500  | -3.00024200 | 0.31073900  |
|          |             |             |             | F | 3.79664000  | -4.32676200 | -0.20821600 |
| <b>V</b> |             |             |             |   |             |             |             |
| P        | -1.20107200 | 0.84809300  | 0.09107000  |   |             |             |             |
| C        | -1.02779800 | 0.73653600  | 1.89757100  |   |             |             |             |
| C        | -1.26268300 | -0.46863200 | 2.56979200  |   |             |             |             |
| C        | -0.57666900 | 1.86141900  | 2.60161600  |   |             |             |             |
| C        | -1.03076000 | -0.54723400 | 3.94088400  |   |             |             |             |
| H        | -1.61362800 | -1.34589900 | 2.02921100  |   |             |             |             |
| C        | -0.37815300 | 1.77976100  | 3.97704500  |   |             |             |             |
| H        | -0.37206000 | 2.79484100  | 2.07660100  |   |             |             |             |
| C        | -0.59585300 | 0.57462200  | 4.64525300  |   |             |             |             |
| H        | -1.19701000 | -1.49184600 | 4.45958300  |   |             |             |             |
| H        | -0.03822200 | 2.65939900  | 4.52478000  |   |             |             |             |
| H        | -0.42280700 | 0.50938800  | 5.72043900  |   |             |             |             |
| C        | -2.23632500 | 2.13488800  | -0.63926100 |   |             |             |             |
| C        | -3.14754900 | 2.83130200  | 0.15733300  |   |             |             |             |
| C        | -2.10204400 | 2.42358800  | -2.00097100 |   |             |             |             |
| C        | -3.94400600 | 3.81634600  | -0.42619100 |   |             |             |             |
| H        | -3.25339400 | 2.59976900  | 1.21900100  |   |             |             |             |
| C        | -2.91218400 | 3.40043400  | -2.57441800 |   |             |             |             |
| H        | -1.38006300 | 1.88343600  | -2.61900600 |   |             |             |             |

**Product 3a**

|   |             |             |             |   |             |             |             |
|---|-------------|-------------|-------------|---|-------------|-------------|-------------|
| P | 1.88556000  | -0.87075500 | -0.45366600 | H | 1.74823900  | 4.02780500  | -3.96247500 |
| C | 0.60009600  | -2.14771600 | -0.40383800 | H | 4.14795100  | 4.32559200  | -3.36196400 |
| C | 0.08632700  | -2.53924900 | -1.64823000 | H | 5.14265200  | 2.95231600  | -1.53748100 |
| C | 0.22293500  | -2.83153800 | 0.75517500  | C | 1.09260300  | 0.79573400  | -0.67006400 |
| C | -0.81883000 | -3.59328000 | -1.72824200 | C | -0.13474400 | 1.19576000  | -0.29116300 |
| H | 0.41145900  | -2.02269500 | -2.55428800 | P | -1.42642000 | 0.36395100  | 0.68334600  |
| C | -0.67274800 | -3.89654400 | 0.66813800  | O | 2.83108700  | -1.10502700 | -1.59739800 |
| H | 0.61899900  | -2.52931000 | 1.72427400  | C | -2.48907300 | 1.75475600  | 1.18722400  |
| C | -1.19469500 | -4.27374600 | -0.56855900 | C | -2.63255600 | 1.98639500  | 2.55721200  |
| H | -1.22538000 | -3.89010500 | -2.69612800 | C | -3.15444300 | 2.56866100  | 0.26302700  |
| H | -0.96413700 | -4.43220600 | 1.57265400  | C | -3.43591800 | 3.03694800  | 3.00306900  |
| H | -1.90015600 | -5.10435200 | -0.63099700 | H | -2.11274200 | 1.33320500  | 3.26037700  |
| C | 2.74859400  | -0.82641400 | 1.14331100  | C | -3.95291900 | 3.61796200  | 0.71182500  |
| C | 2.15672500  | -0.40146100 | 2.33919300  | H | -3.06190700 | 2.38069700  | -0.81007600 |
| C | 4.09047400  | -1.22415900 | 1.11813900  | C | -4.09253500 | 3.85196800  | 2.08209400  |
| C | 2.91591800  | -0.38485800 | 3.50878300  | H | -3.54915100 | 3.21831700  | 4.07285800  |
| H | 1.10357900  | -0.10838000 | 2.35754400  | H | -4.47217600 | 4.25231400  | -0.00773200 |
| C | 4.84155100  | -1.20262800 | 2.29268800  | H | -4.72045000 | 4.67300700  | 2.43148400  |
| H | 4.53164100  | -1.53602200 | 0.16930000  | C | -2.43325400 | -0.59632300 | -0.48258900 |
| C | 4.25399300  | -0.78315100 | 3.48649000  | C | -2.48196800 | -0.31558200 | -1.85306400 |
| H | 2.45912800  | -0.05734700 | 4.44382200  | C | -3.22572400 | -1.61540000 | 0.05374700  |
| H | 5.88784700  | -1.51103300 | 2.27480300  | C | -3.33171500 | -1.04679800 | -2.68063300 |
| H | 4.84268600  | -0.76390100 | 4.40513800  | H | -1.84539400 | 0.46256200  | -2.28187300 |
| C | 3.31340800  | 1.90153800  | -1.11889700 | C | -4.07554500 | -2.34320100 | -0.77846700 |
| C | 1.95499400  | 1.74451200  | -1.43287700 | H | -3.16189500 | -1.84029000 | 1.12068800  |
| C | 1.40616700  | 2.51765300  | -2.46507900 | C | -4.13038700 | -2.05763600 | -2.14241600 |
| C | 2.18936200  | 3.44016100  | -3.15613000 | H | -3.36723700 | -0.83054000 | -3.74923700 |
| C | 3.53315700  | 3.60366500  | -2.82251300 | H | -4.69158300 | -3.14116100 | -0.36094300 |
| C | 4.09120300  | 2.83226700  | -1.80192000 | H | -4.79504800 | -2.62910000 | -2.79224600 |
| H | 3.76342500  | 1.30178200  | -0.32611600 | H | -0.40509600 | 2.23110300  | -0.53516800 |
| H | 0.35875700  | 2.37854700  | -2.74058600 | O | -0.96531700 | -0.41353900 | 1.88696700  |



### 13. Reference

44. Elson, K. E., Jenkins, I. D. & Loughlin, W. A. Cyclic Analogues of the Hendrickson 'POP' Reagent. *Aust. J. Chem.* **57**, 371–376, (2004).
45. Zhang, D., Lian, M., Liu, J., Tang, S., Liu, G., Ma, C., Meng, Q., Peng, H. & Zhu, D. Preparation of O-Protected Cyanohydrins by Aerobic Oxidation of  $\alpha$ -Substituted Malononitriles in the Presence of Diarylphosphine Oxides. *Org. Lett.* **21**, 2597–2601, (2019).
46. Liu, X. T., Han, X. Y., Wu, Y., Sun, Y. Y., Gao, L., Huang, Z. & Zhang, Q. W. Ni-Catalyzed Asymmetric Hydrophosphination of Unactivated Alkynes. *J. Am. Chem. Soc.* **143**, 11309–11316, (2021).
47. Peng, L., Xu, F., Shinohara, K., Nishida, T., Wakamatsu, K., Orita, A. & Otera, J. Remarkable electron-withdrawing effect of the Ph<sub>2</sub>P(O)-ethynyl group: Ph<sub>2</sub>P(O)-ethynyl-substituted aryl halides and copper acetylides for tailor-made Sonogashira couplings. *Org. Chem. Front.* **2**, 248–252, (2015).
48. Doherty, S., Knight, J. G., McGrady, J. P., Ferguson, A. M., Ward, N. A. B., Harrington, R. W. & Clegg, W. ortho, ortho'-Substituted KITPHOS Monophosphines: Highly Efficient Ligands for Palladium-Catalyzed C–C and C–N Bond Formation. *Adv. Synth. Catal.* **352**, 201–211, (2010).
49. Yang, J., Chen, T., Zhou, Y., Yin, S. & Han, L. B. Palladium-catalyzed dehydrogenative coupling of terminal alkynes with secondary phosphine oxides. *Chem. Commun.* **51**, 3549–3551, (2015).
50. Gatignol, J., Alayrac, C., Lohier, J.-F., Ballester, J., Taillefer, M. & Gaumont, A.-C. Copper-Catalyzed Synthesis of 1,3-Butadienylphosphine Oxides and Chemoselective Phosphoryl Reduction to Stereodefined 1,3-Butadienylphosphines. *Adv. Synth. Catal.* **355**, 2822–2826, (2013).
51. Yue, W.-J., Xiao, J.-Z., Zhang, S. & Yin, L. Rapid Synthesis of Chiral 1,2-Bisphosphine Derivatives through Copper(I)-Catalyzed Asymmetric Conjugate Hydrophosphination. *Angew. Chem. Int. Ed.* **59**, 7057–7062, (2020).
52. Isshiki, R., Inayama, N., Muto, K. & Yamaguchi, J. Ester Transfer Reaction of Aromatic Esters with Haloarenes and Arenols by a Nickel Catalyst. *ACS Catal.* **10**, 3490–3494, (2020).

## 14. NMR spectra

# NMR spectra

8.90  
8.89  
7.73  
7.72  
7.70  
7.68  
7.67  
7.66  
7.53  
7.51  
7.49  
7.48  
7.37  
7.36  
7.34  
7.29  
7.28  
7.26

3.27  
3.25  
3.23  
3.22  
3.20  
3.19

1.20  
1.17  
1.14  
1.07  
1.05  
1.04  
1.04  
1.02  
1.01  
0.99  
0.99  
0.85

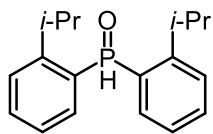

s2x

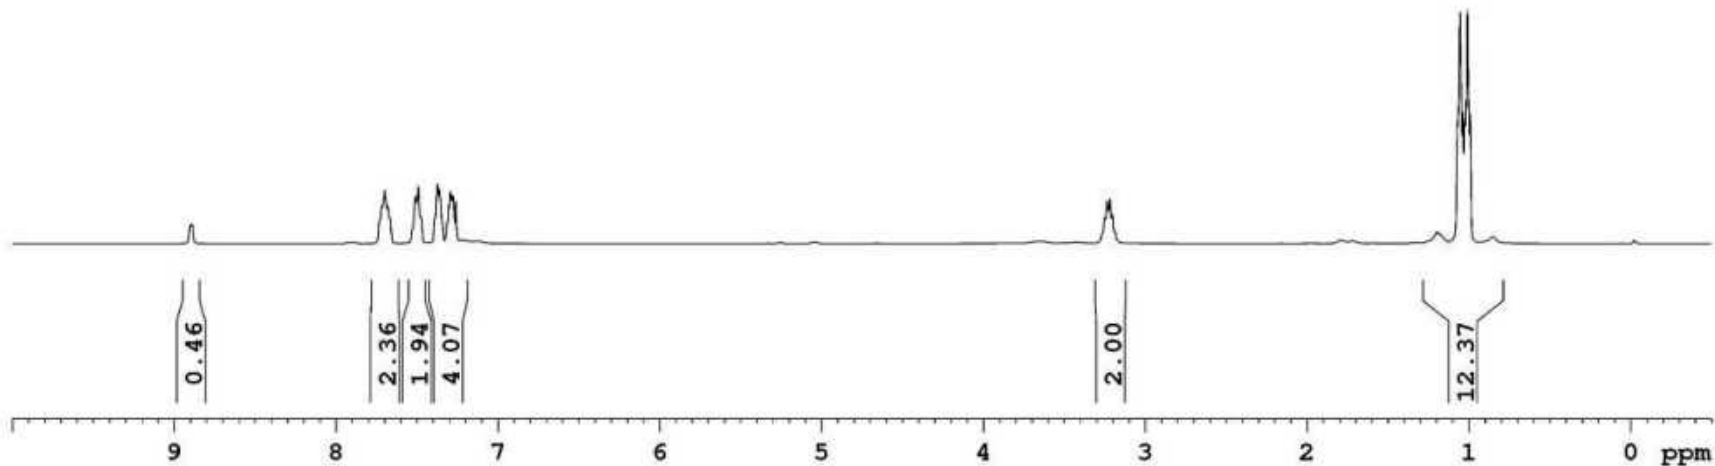

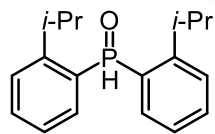

s2x

152.35  
152.25  
132.85  
132.82  
132.30  
132.17  
129.51  
128.50  
126.49  
126.39  
126.22  
126.09

31.01  
30.94  
23.80  
23.59

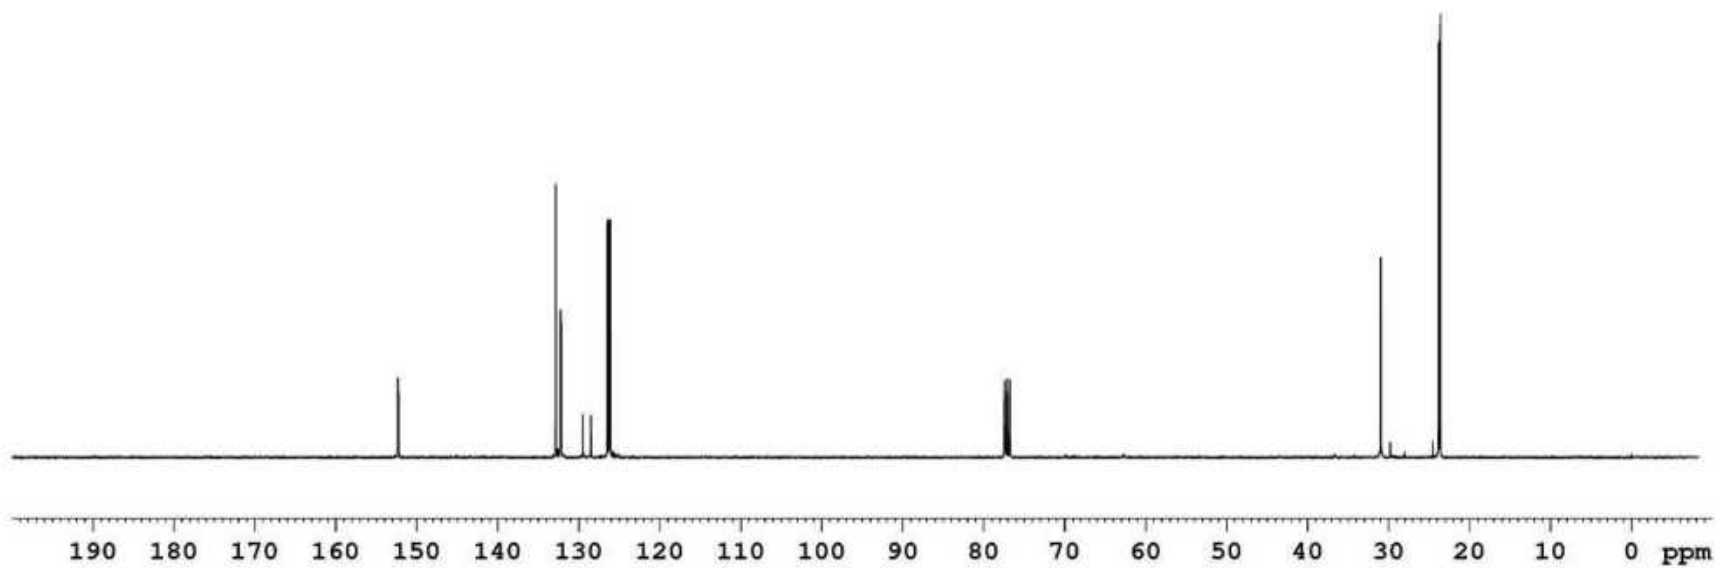

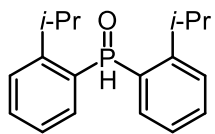

s2x

—17.74

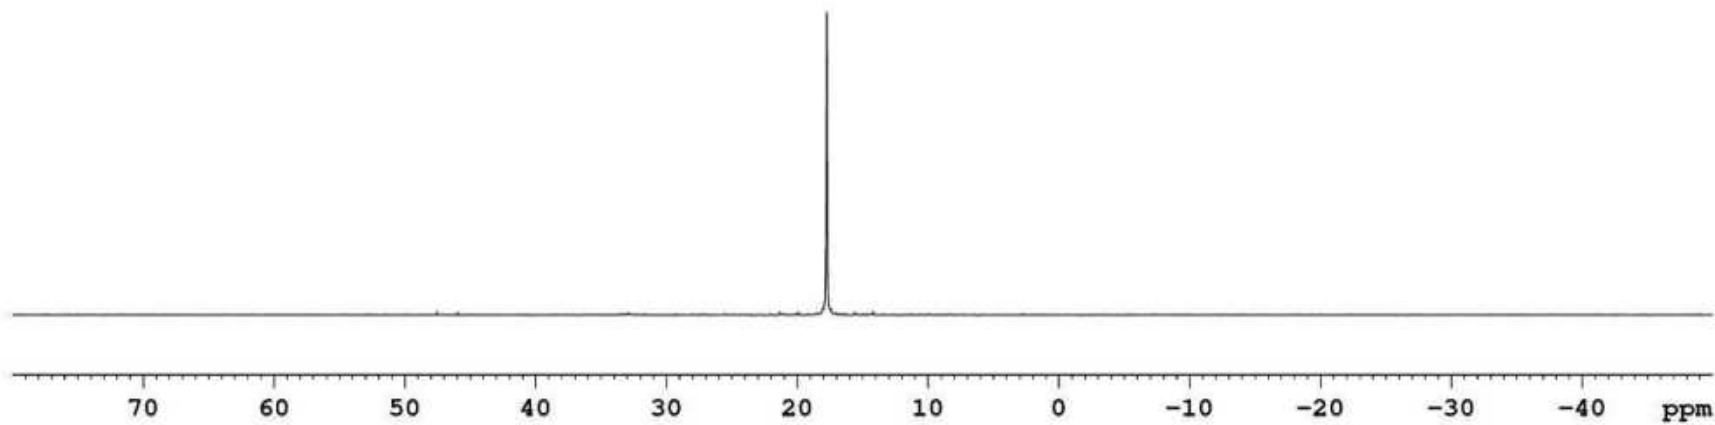

S62

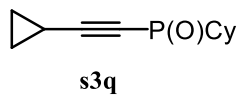

— 7.26

1.90  
1.87  
1.76  
1.69  
1.63  
1.36  
1.35  
1.33  
1.32  
1.28  
1.27  
1.24  
1.16  
0.86  
0.86  
0.85  
0.84  
0.83  
0.83  
0.82  
0.81  
0.80  
0.79  
0.78  
0.77

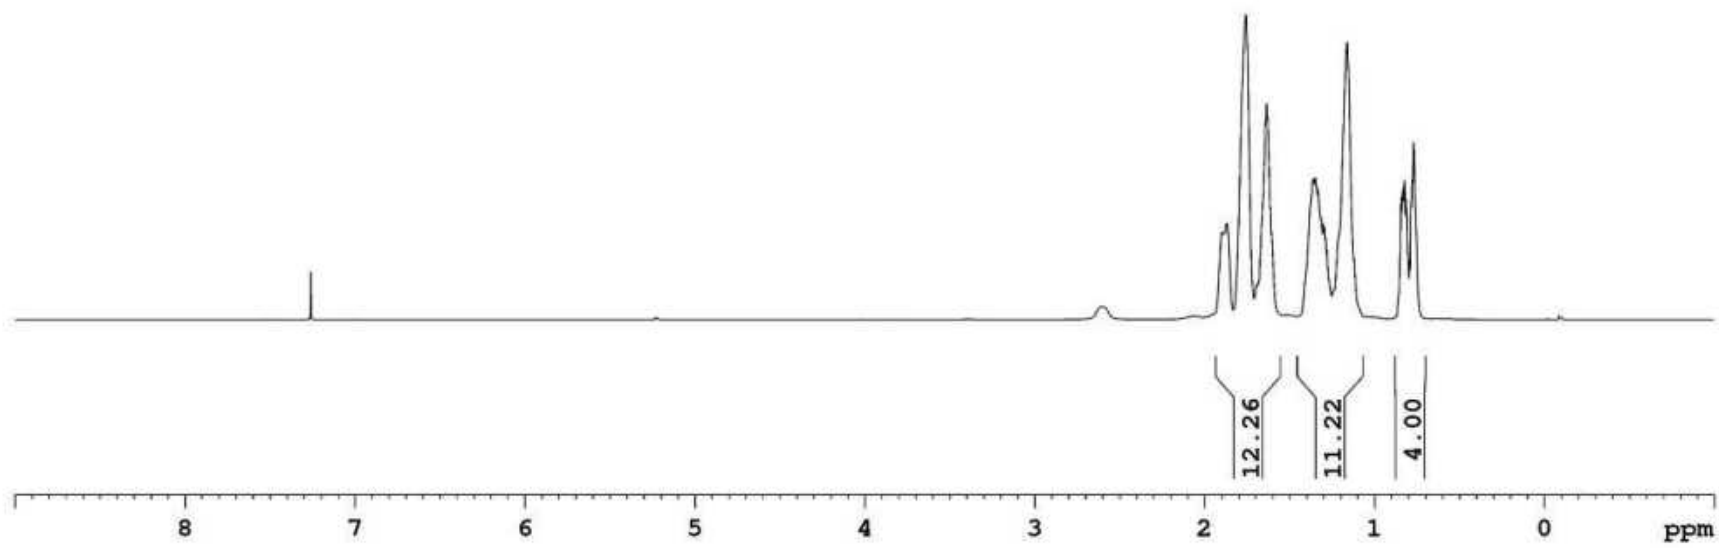

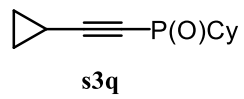

109.67  
109.44

68.40  
66.97

37.01  
36.22  
26.30  
26.20  
26.16  
26.07  
25.80  
25.64  
25.61  
24.59  
24.56  
9.13  
0.03  
-0.00

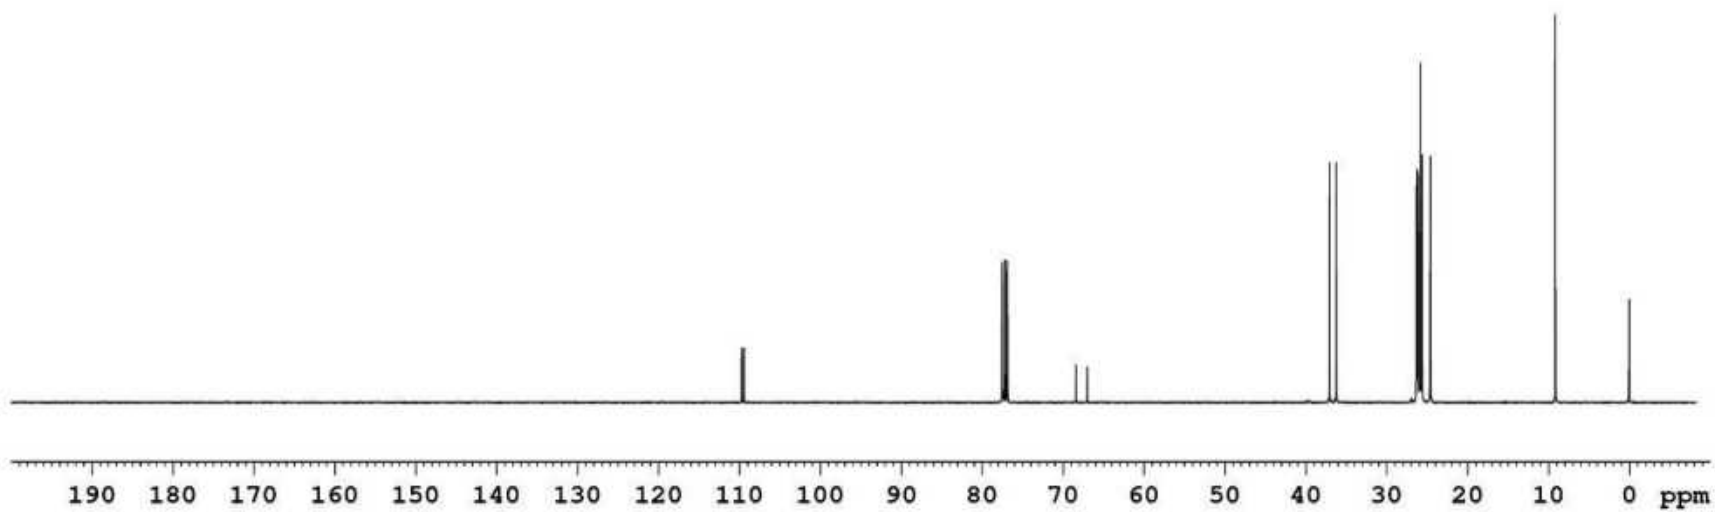



— 34.32

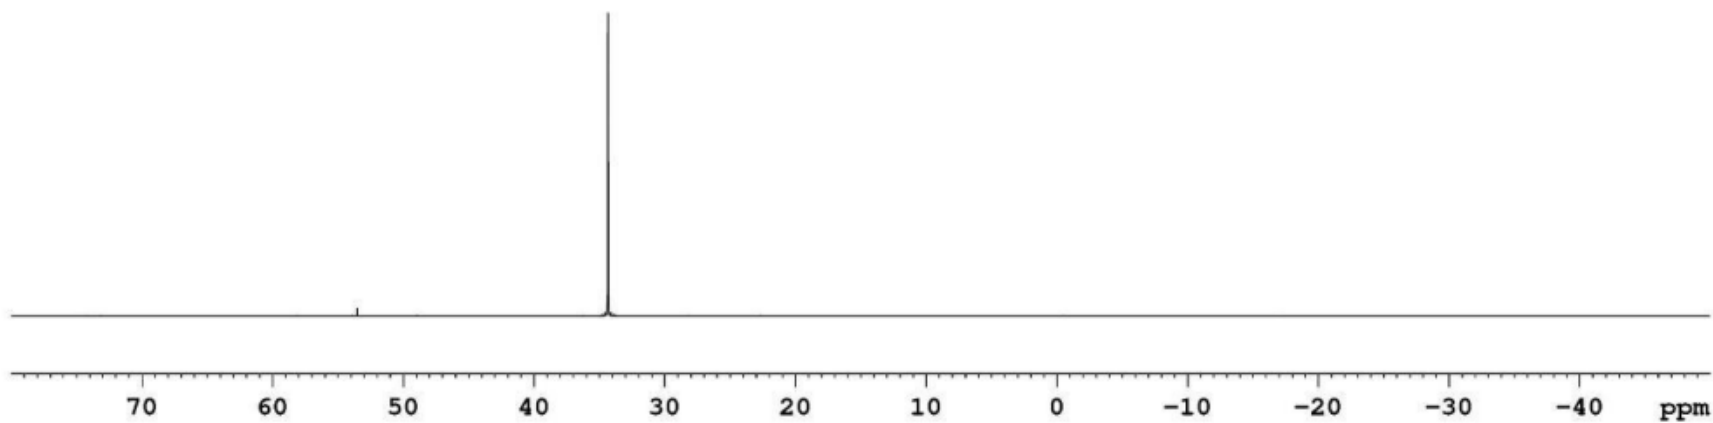

S65



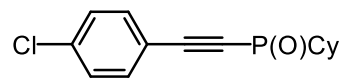

s3r

7.46  
7.44  
7.33  
7.31  
7.26

2.06  
2.03  
2.02  
1.96  
1.95  
1.87  
1.86  
1.85  
1.73  
1.71  
1.57  
1.56  
1.55  
1.53  
1.52  
1.49  
1.47  
1.45  
1.35  
1.29  
1.26  
1.25  
1.22  
1.19  
1.18

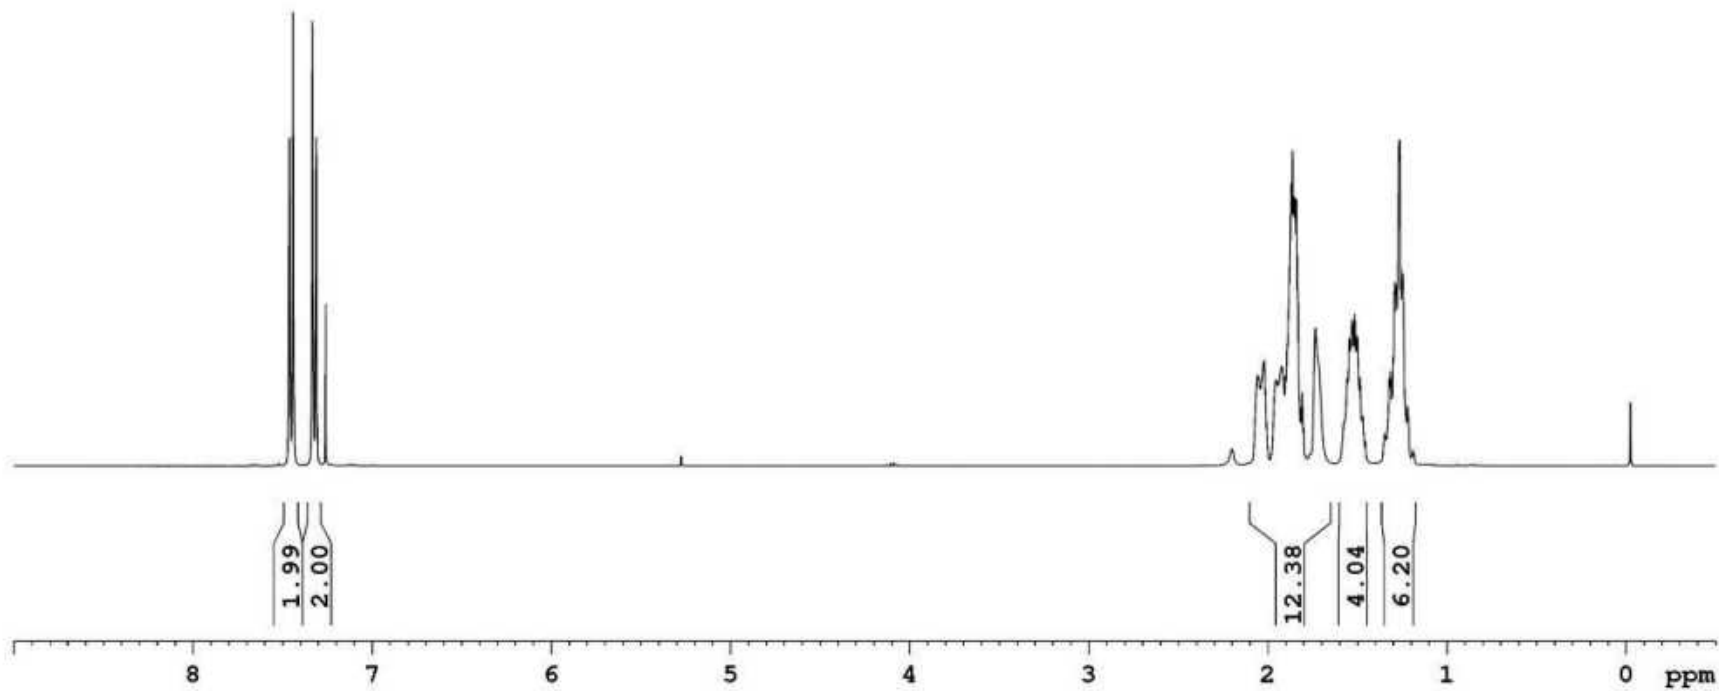

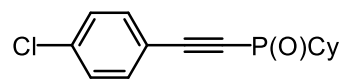

s3r

136.50  
133.63  
133.61  
128.94  
118.94  
118.90

101.93  
101.72

83.27  
81.95

37.23  
36.45  
26.35  
26.25  
26.21  
26.12  
25.84  
25.82  
25.79  
24.75  
24.71

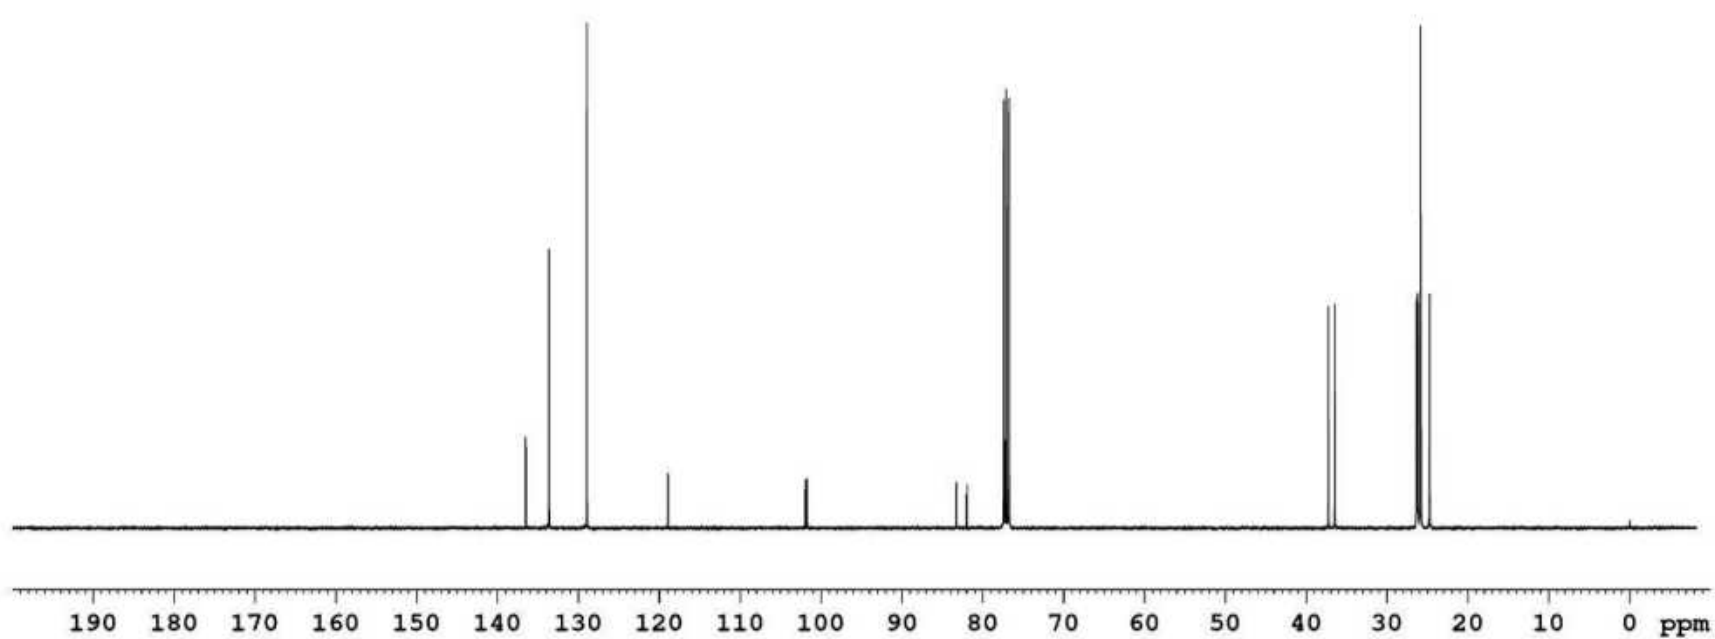



s3r

— 35.67

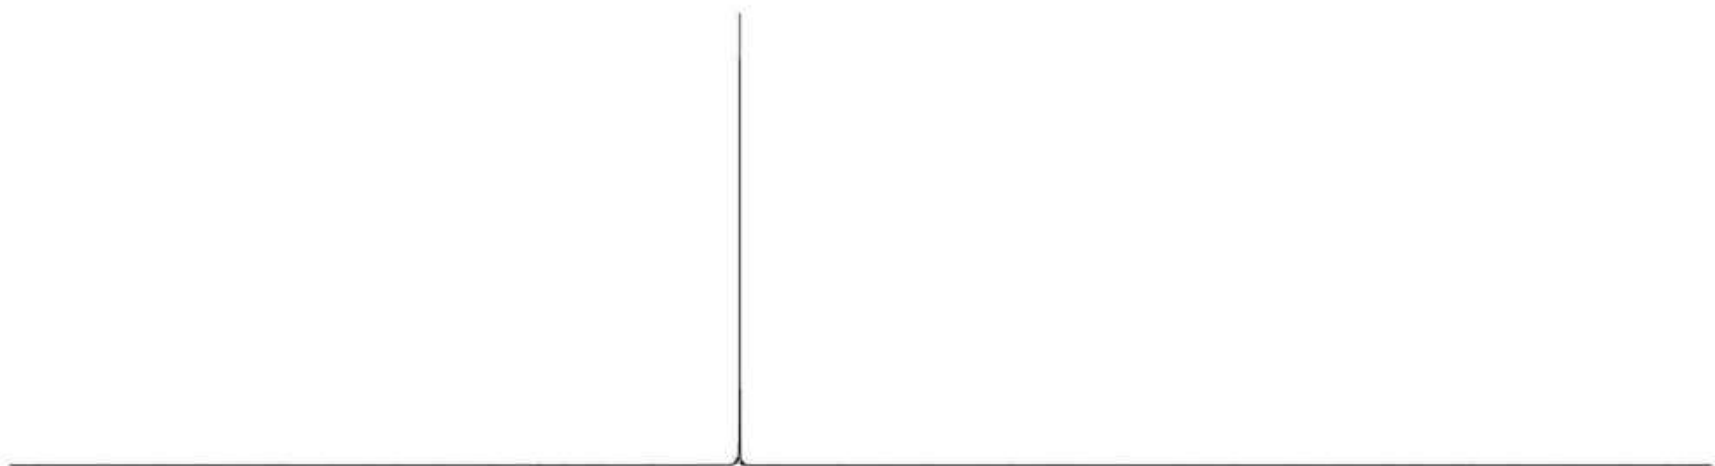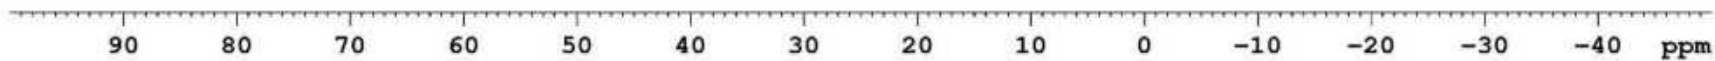

S68

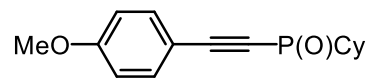

s3s

7.47  
7.45  
7.26  
6.86  
6.84

3.81  
2.05  
2.02  
1.96  
1.95  
1.93  
1.85  
1.85  
1.84  
1.83  
1.82  
1.82  
1.72  
1.69  
1.58  
1.55  
1.54  
1.53  
1.49  
1.46  
1.34  
1.32  
1.31  
1.28  
1.28  
1.26  
1.24  
1.22  
1.21

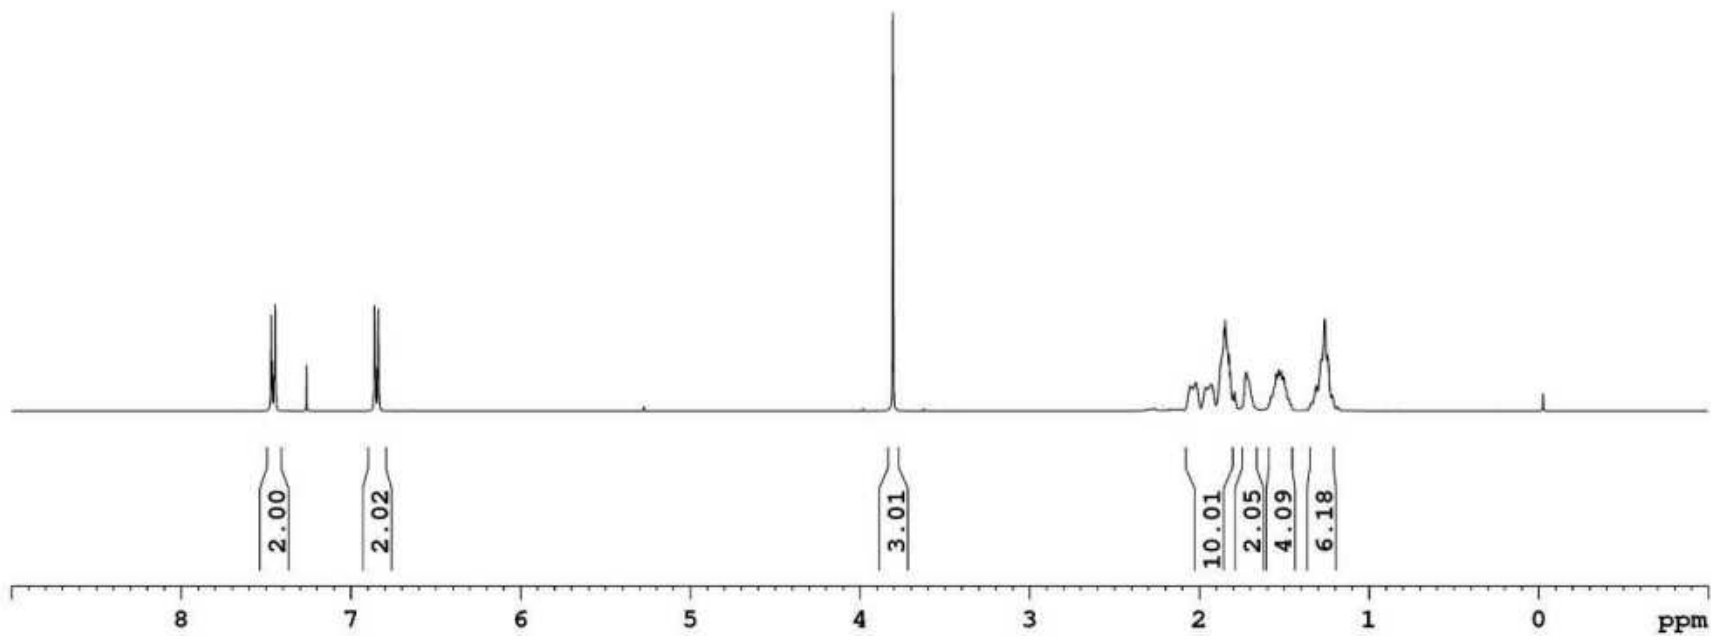

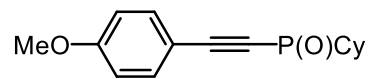

s3s

— 161.05

< 134.11  
< 134.09

< 114.16  
< 112.42  
< 112.38  
< 103.71  
< 103.49

< 80.86  
< 79.49

— 55.39

< 37.27  
< 36.49  
< 26.40  
< 26.30  
< 26.26  
< 26.16  
< 25.88  
< 25.87  
< 25.84  
< 25.81  
< 24.78  
< 24.75

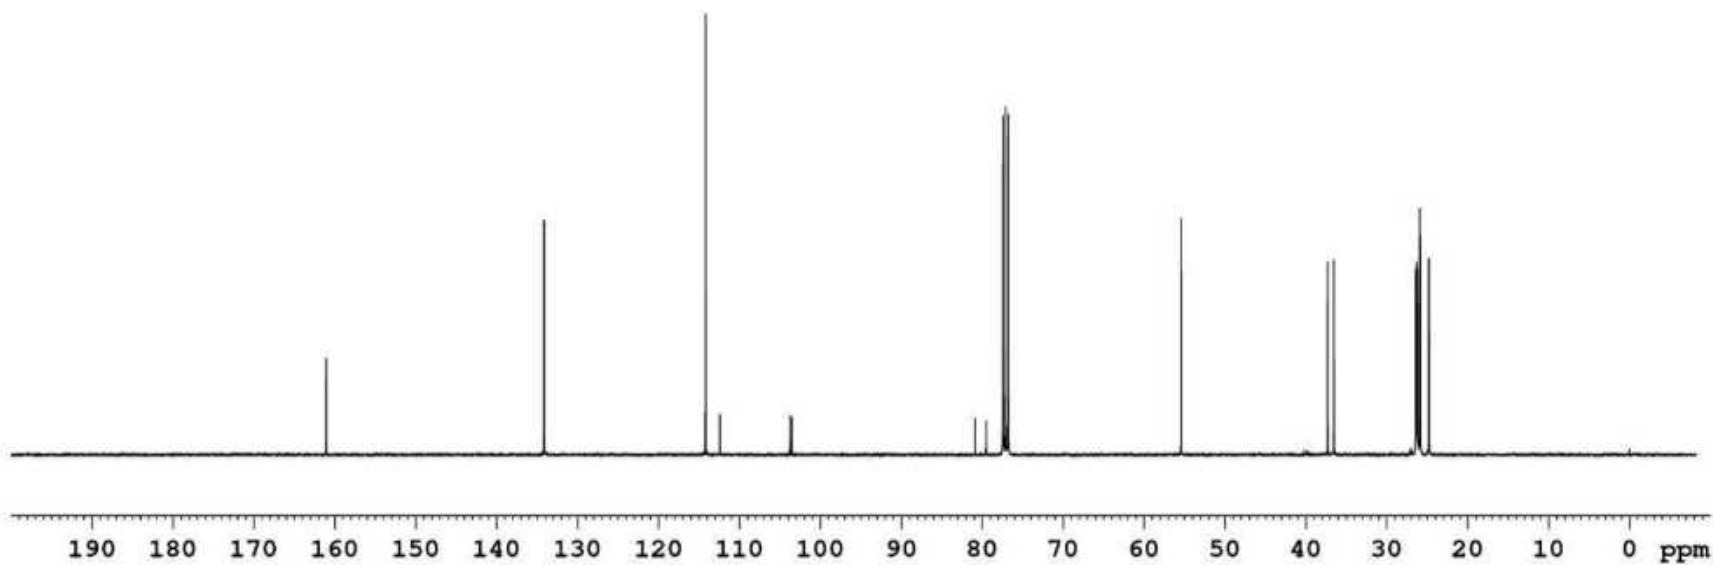

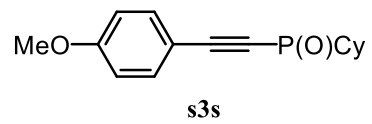

— 35.21

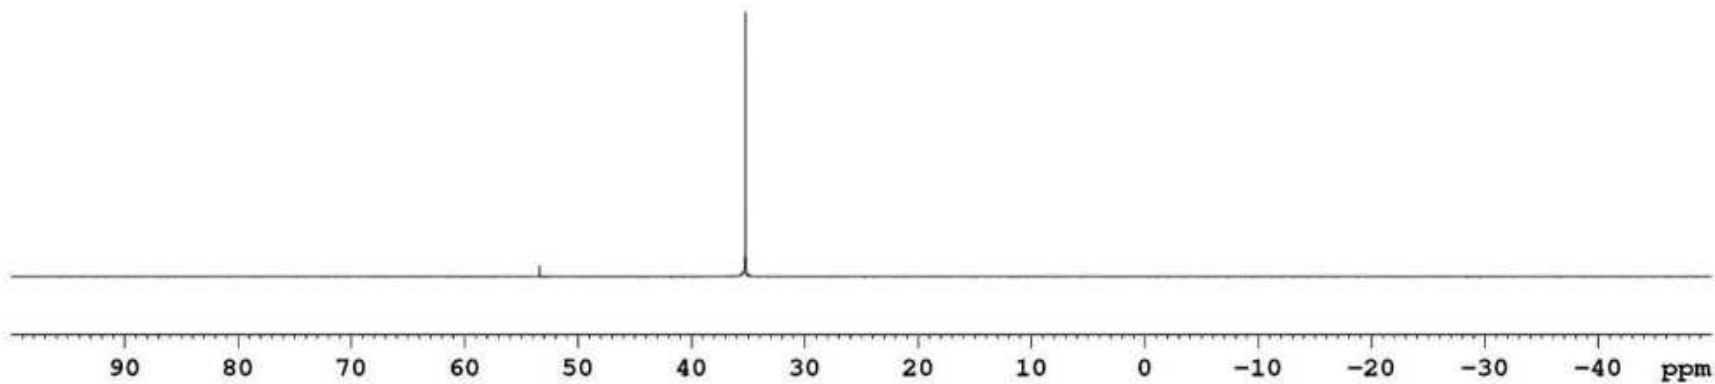

7.96  
7.94  
7.93  
7.91  
7.58  
7.56  
7.45  
7.43  
7.41  
7.37  
7.35  
7.33  
7.31  
7.26

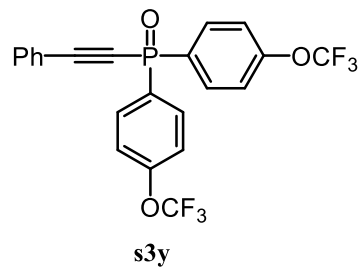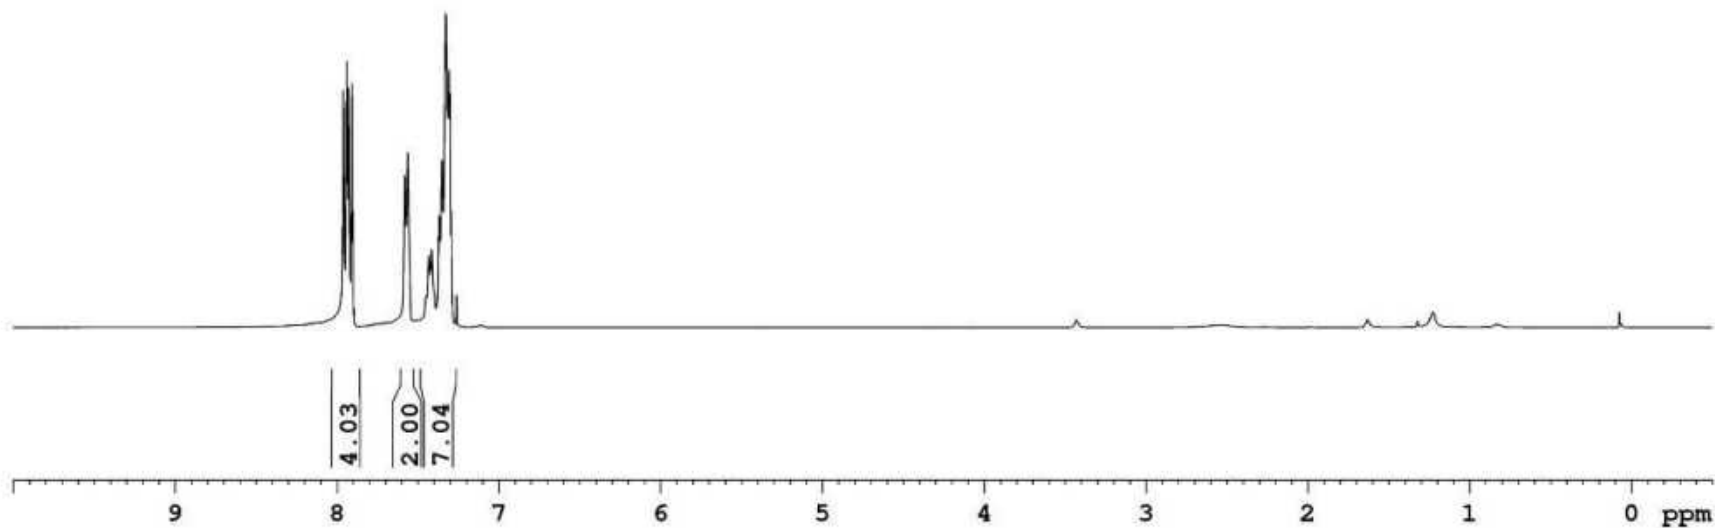

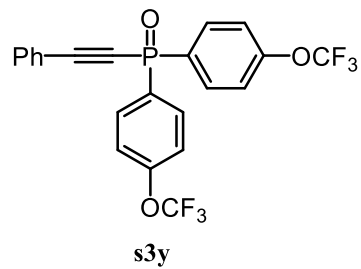

152.35  
152.33  
152.31  
152.30  
133.06  
132.93  
132.58  
132.56  
131.88  
131.12  
130.64  
128.67  
124.14  
121.56  
120.84  
120.70  
119.36  
119.31  
118.99  
116.42  
106.78  
106.46  
82.78  
81.04

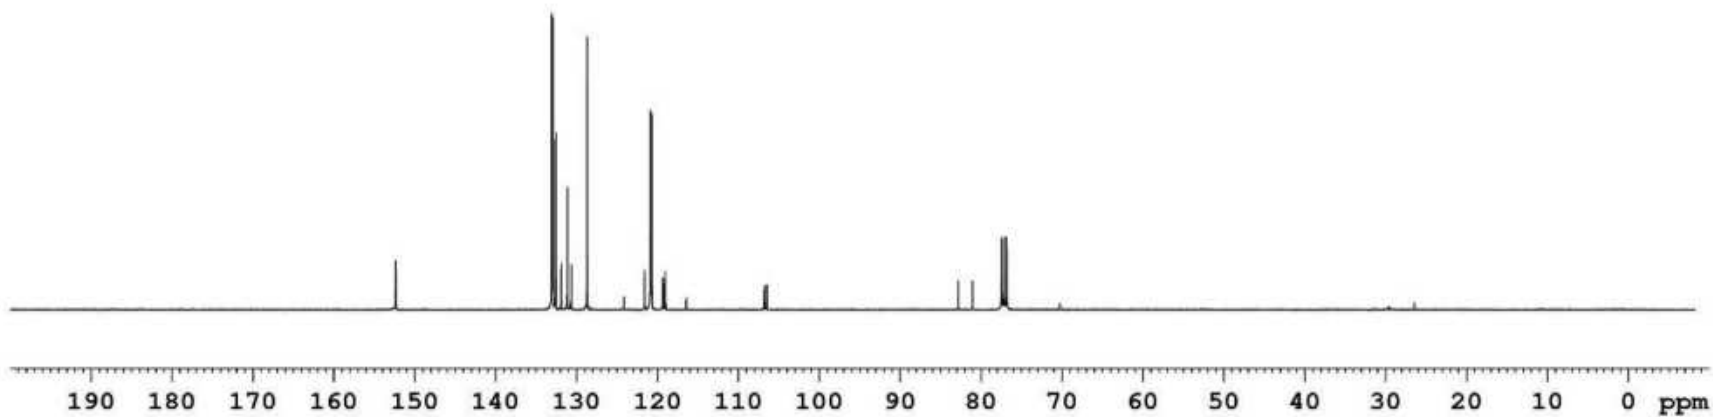



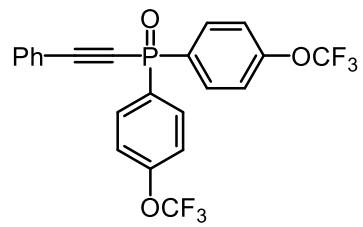

s3y

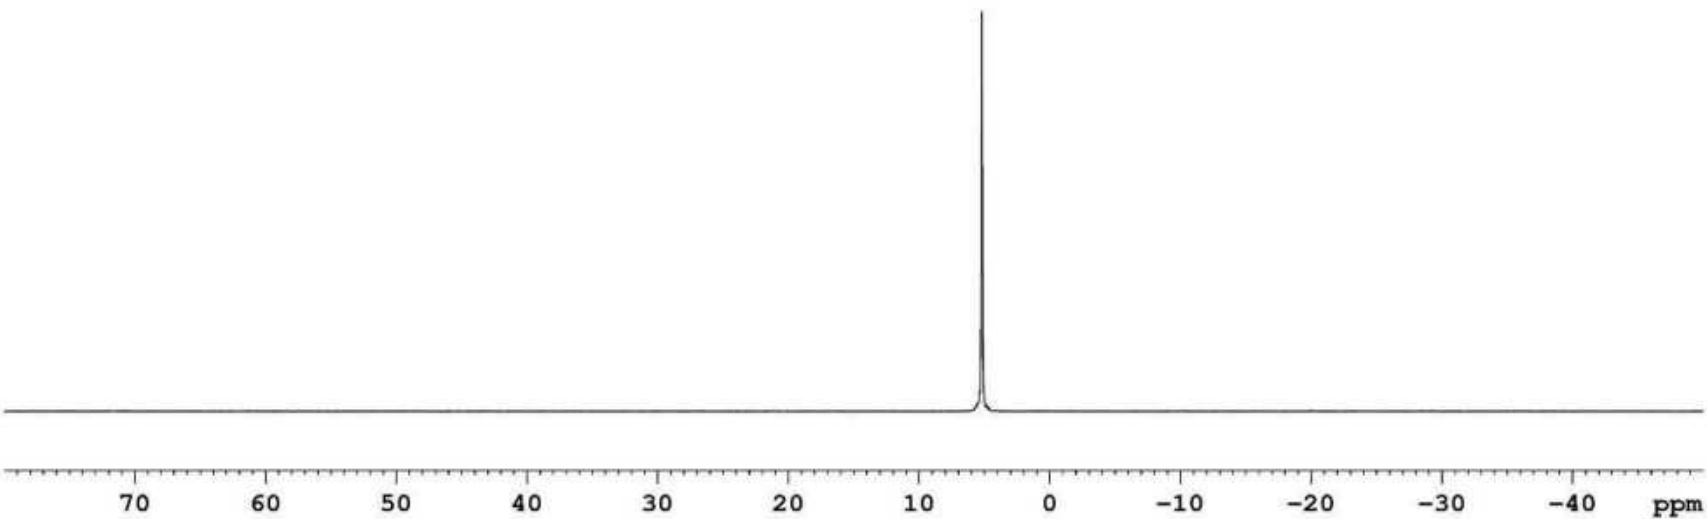

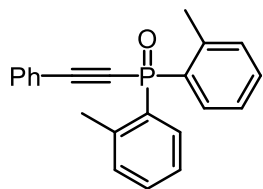

s3z

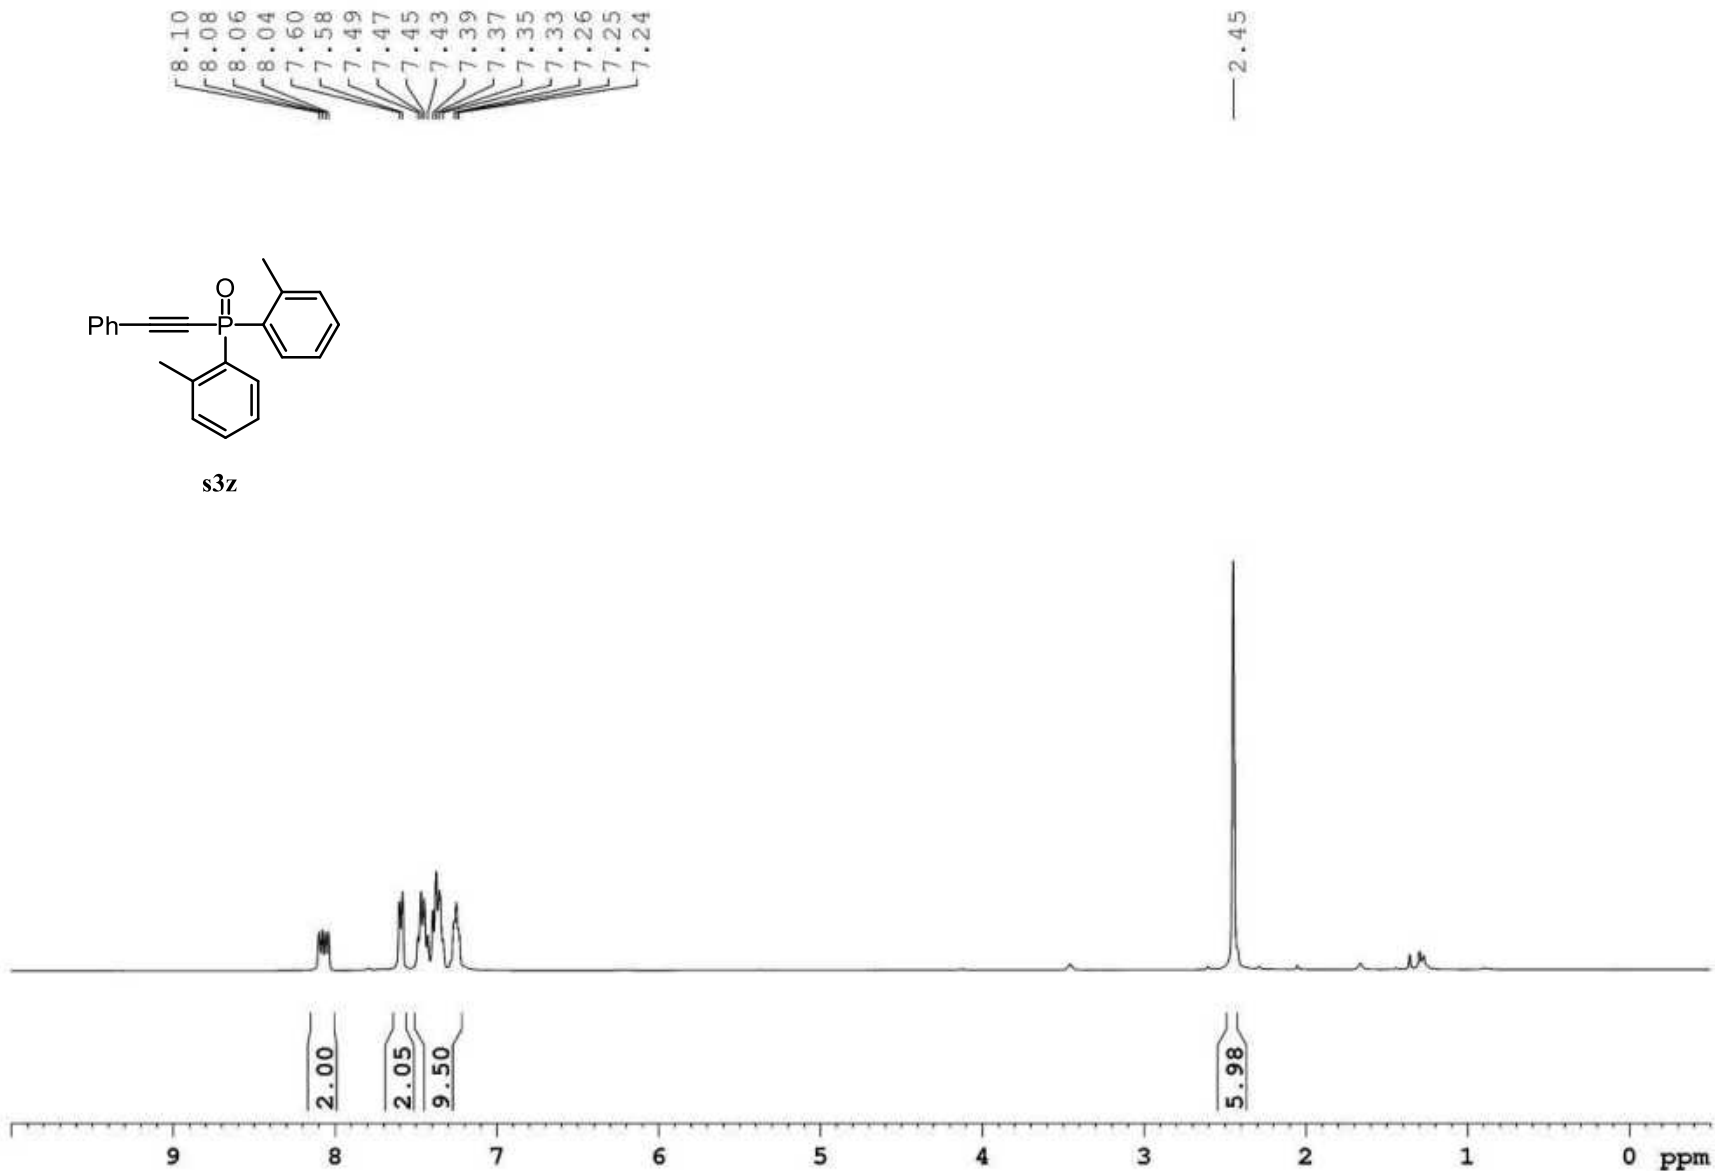



s3z

141.63  
141.52  
132.90  
132.78  
132.42  
131.78  
131.66  
131.20  
130.59  
130.02  
128.61  
125.91  
125.77  
120.25  
120.21  
105.07  
104.78

84.02  
82.36

21.28  
21.23

141.52

132.90  
132.78  
132.42  
131.78  
131.66  
131.20  
130.59  
130.02  
128.61

125.91  
125.77

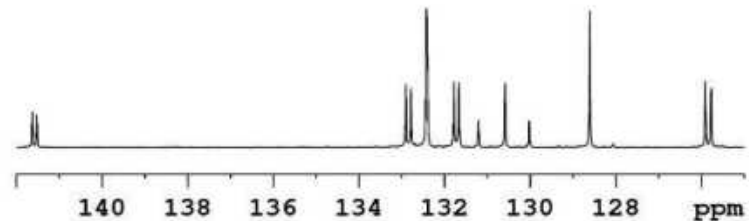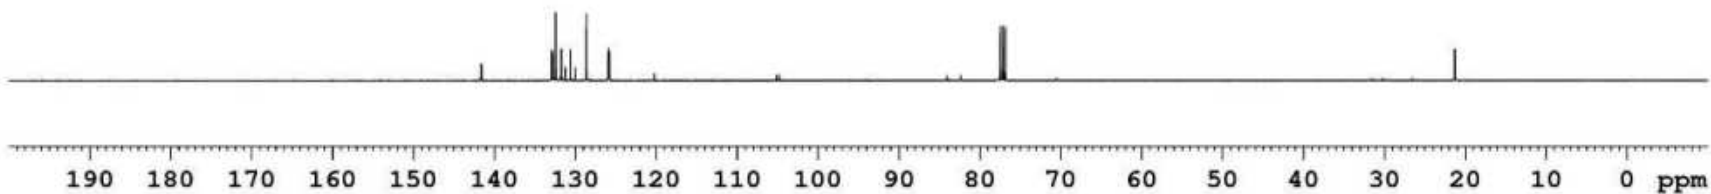



s3z

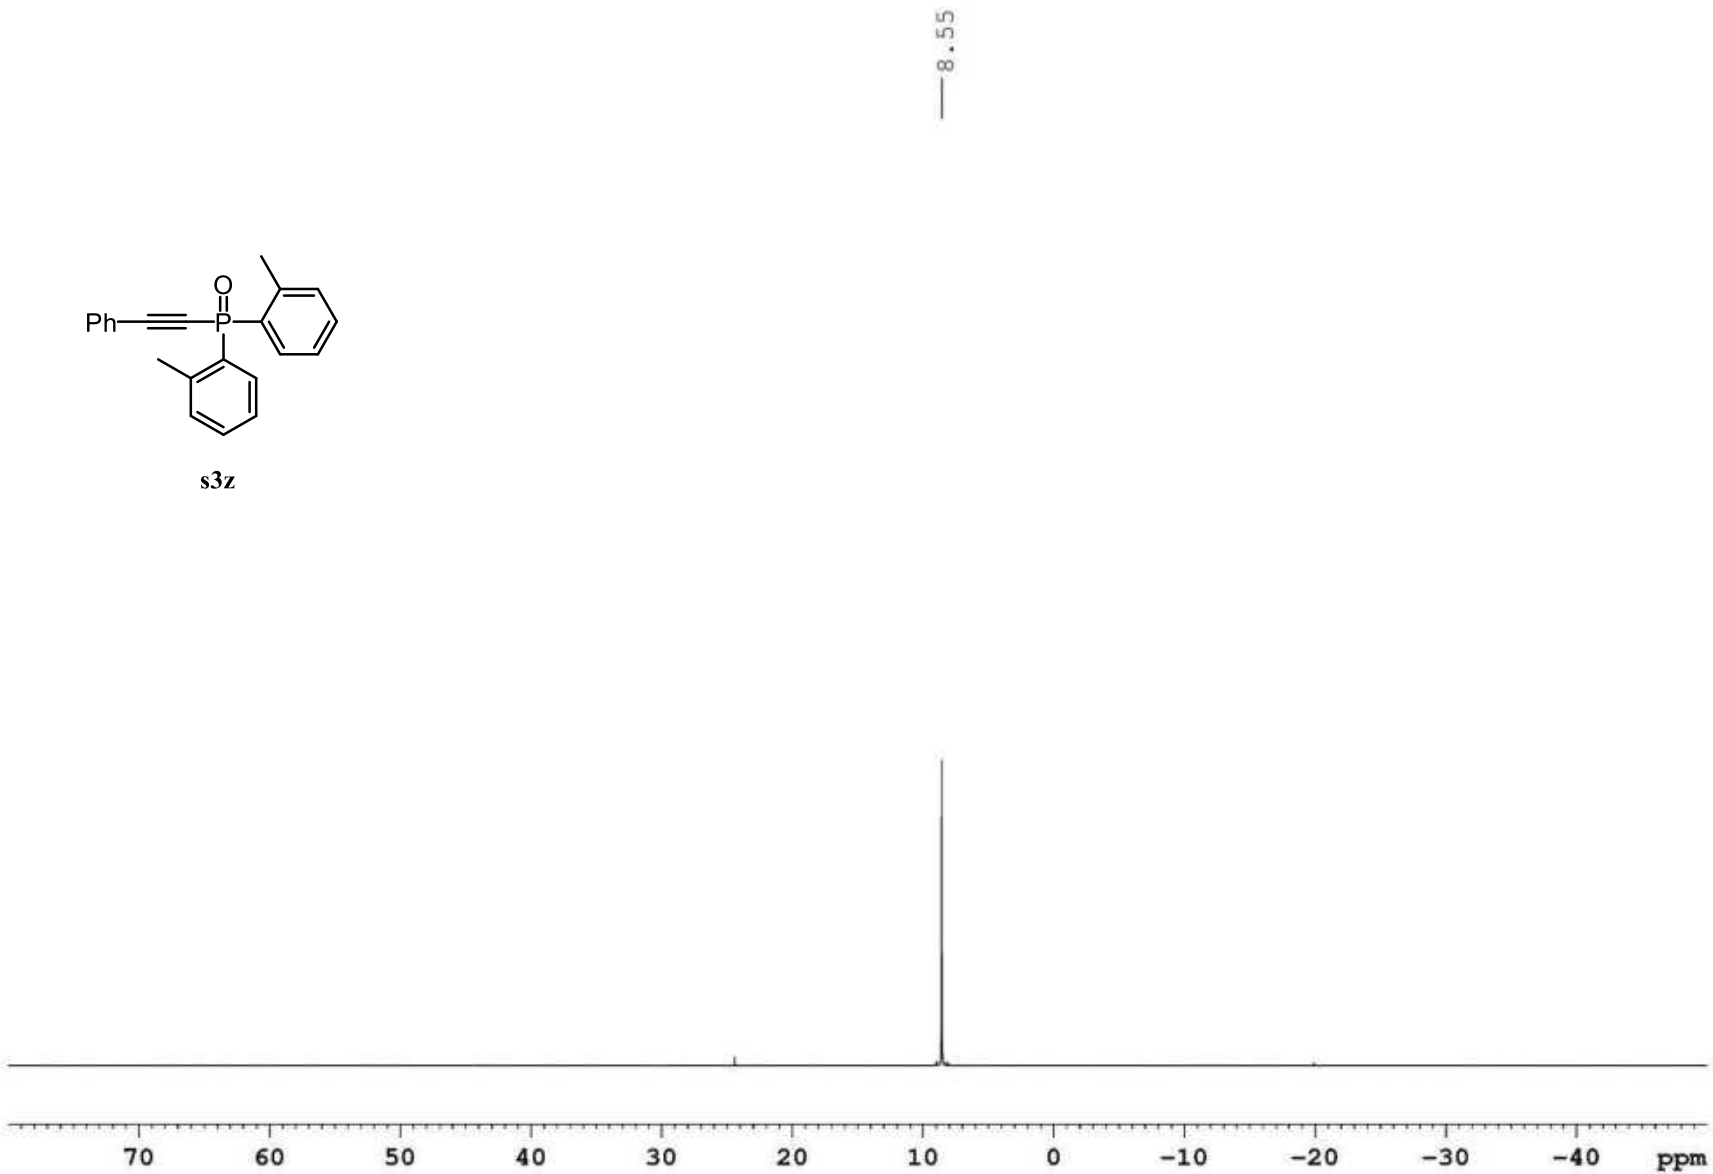

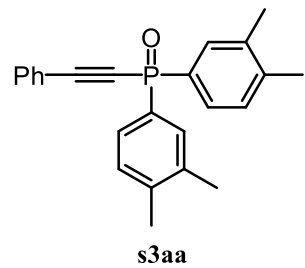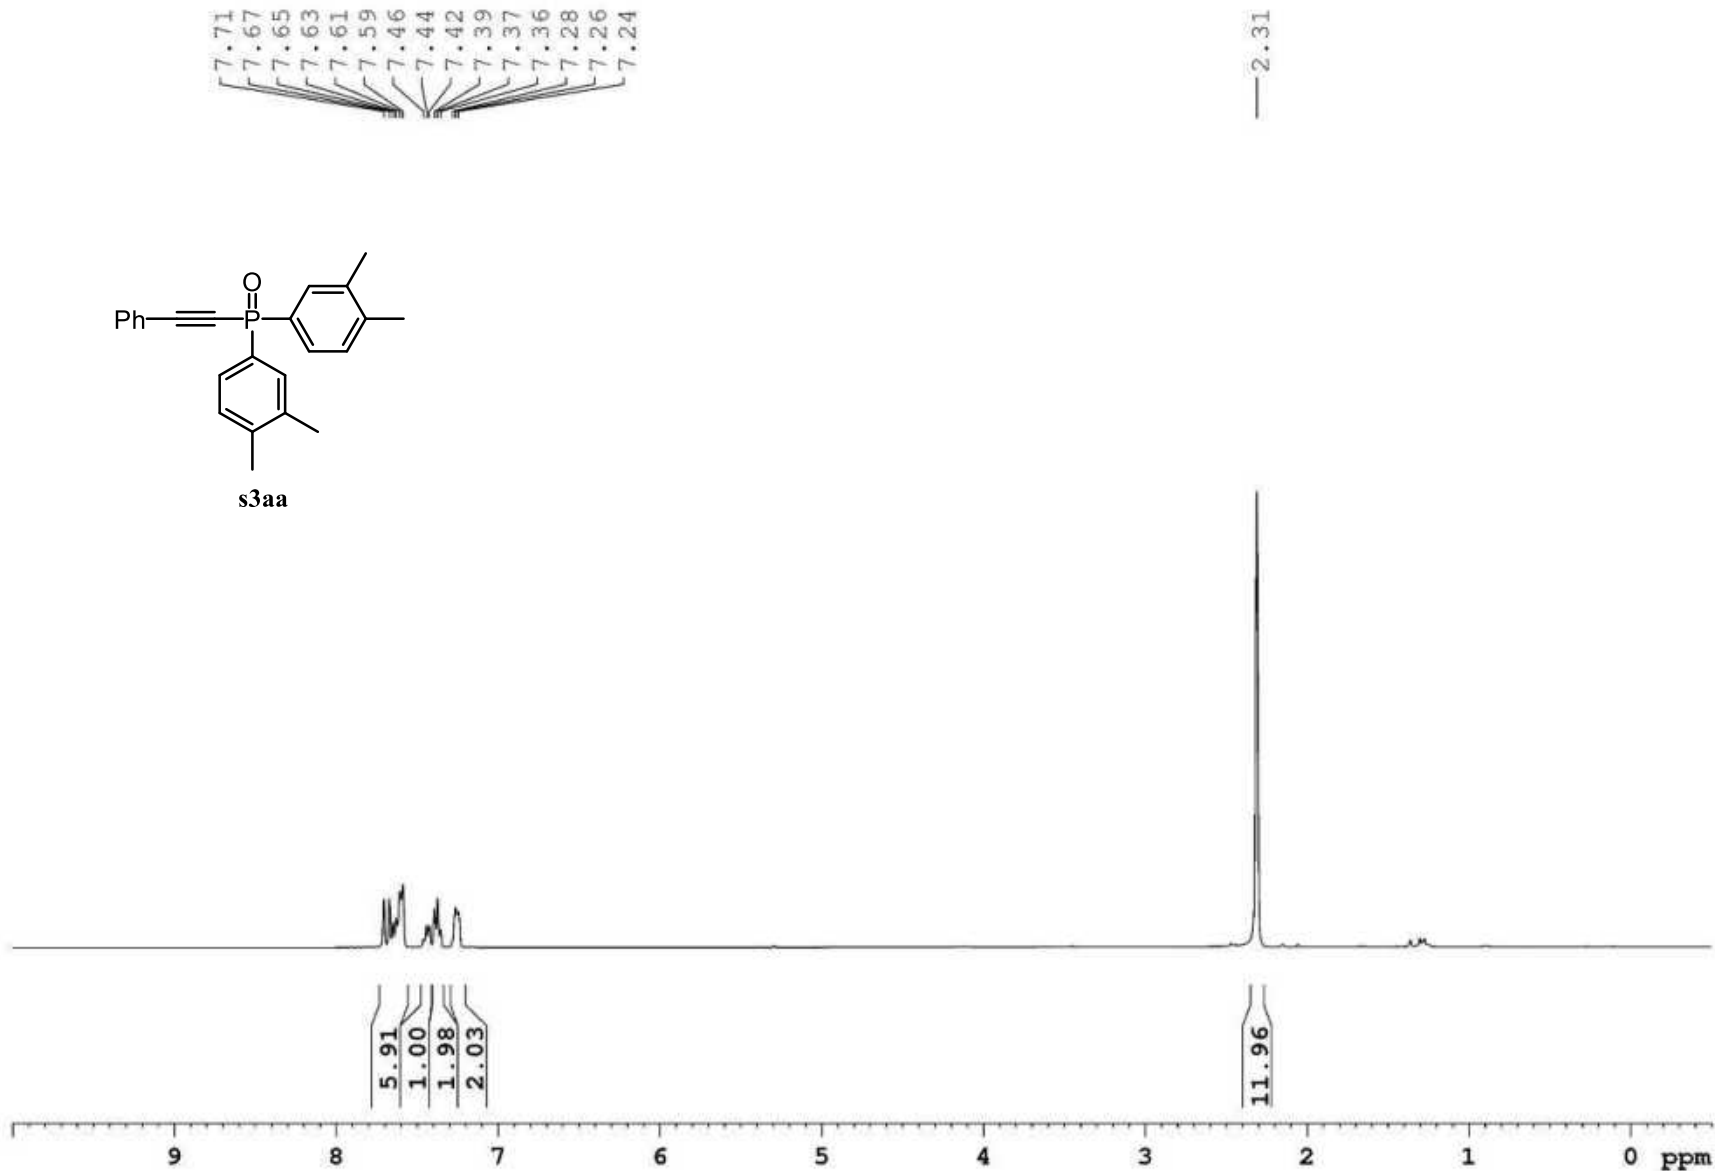

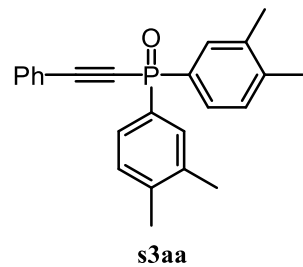

141.48  
141.45  
137.29  
137.15  
132.50  
132.49  
131.92  
131.81  
130.96  
129.95  
129.81  
129.73  
128.62  
128.54  
128.50  
120.31  
120.27  
104.80  
104.51

84.38  
82.72

20.06  
19.85

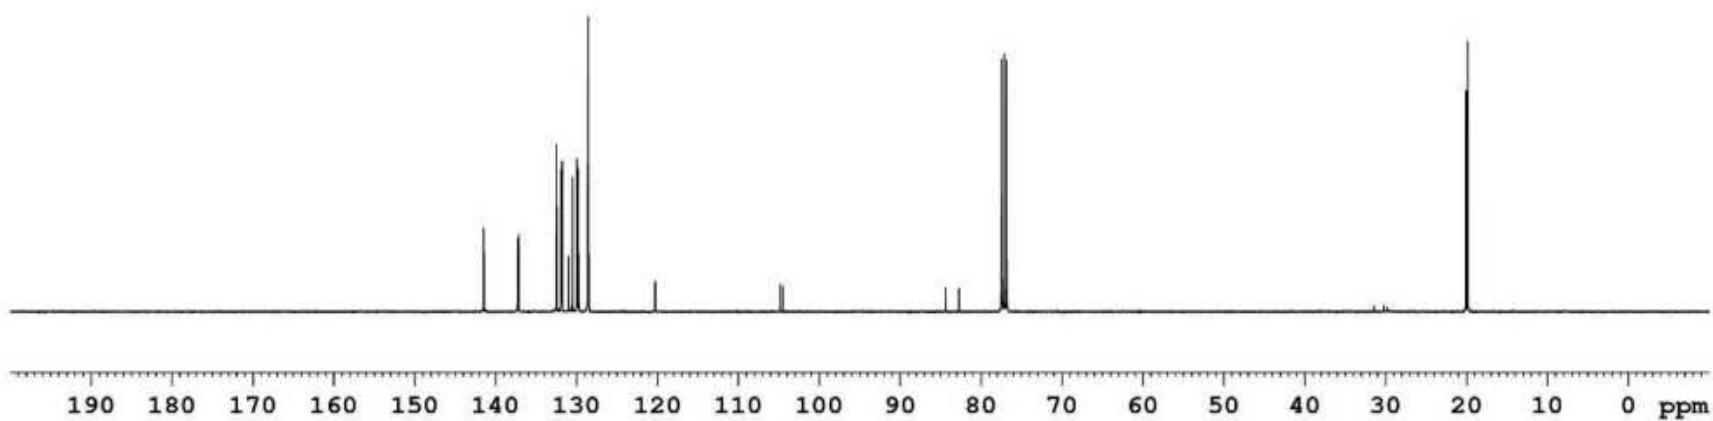

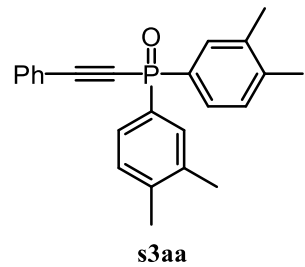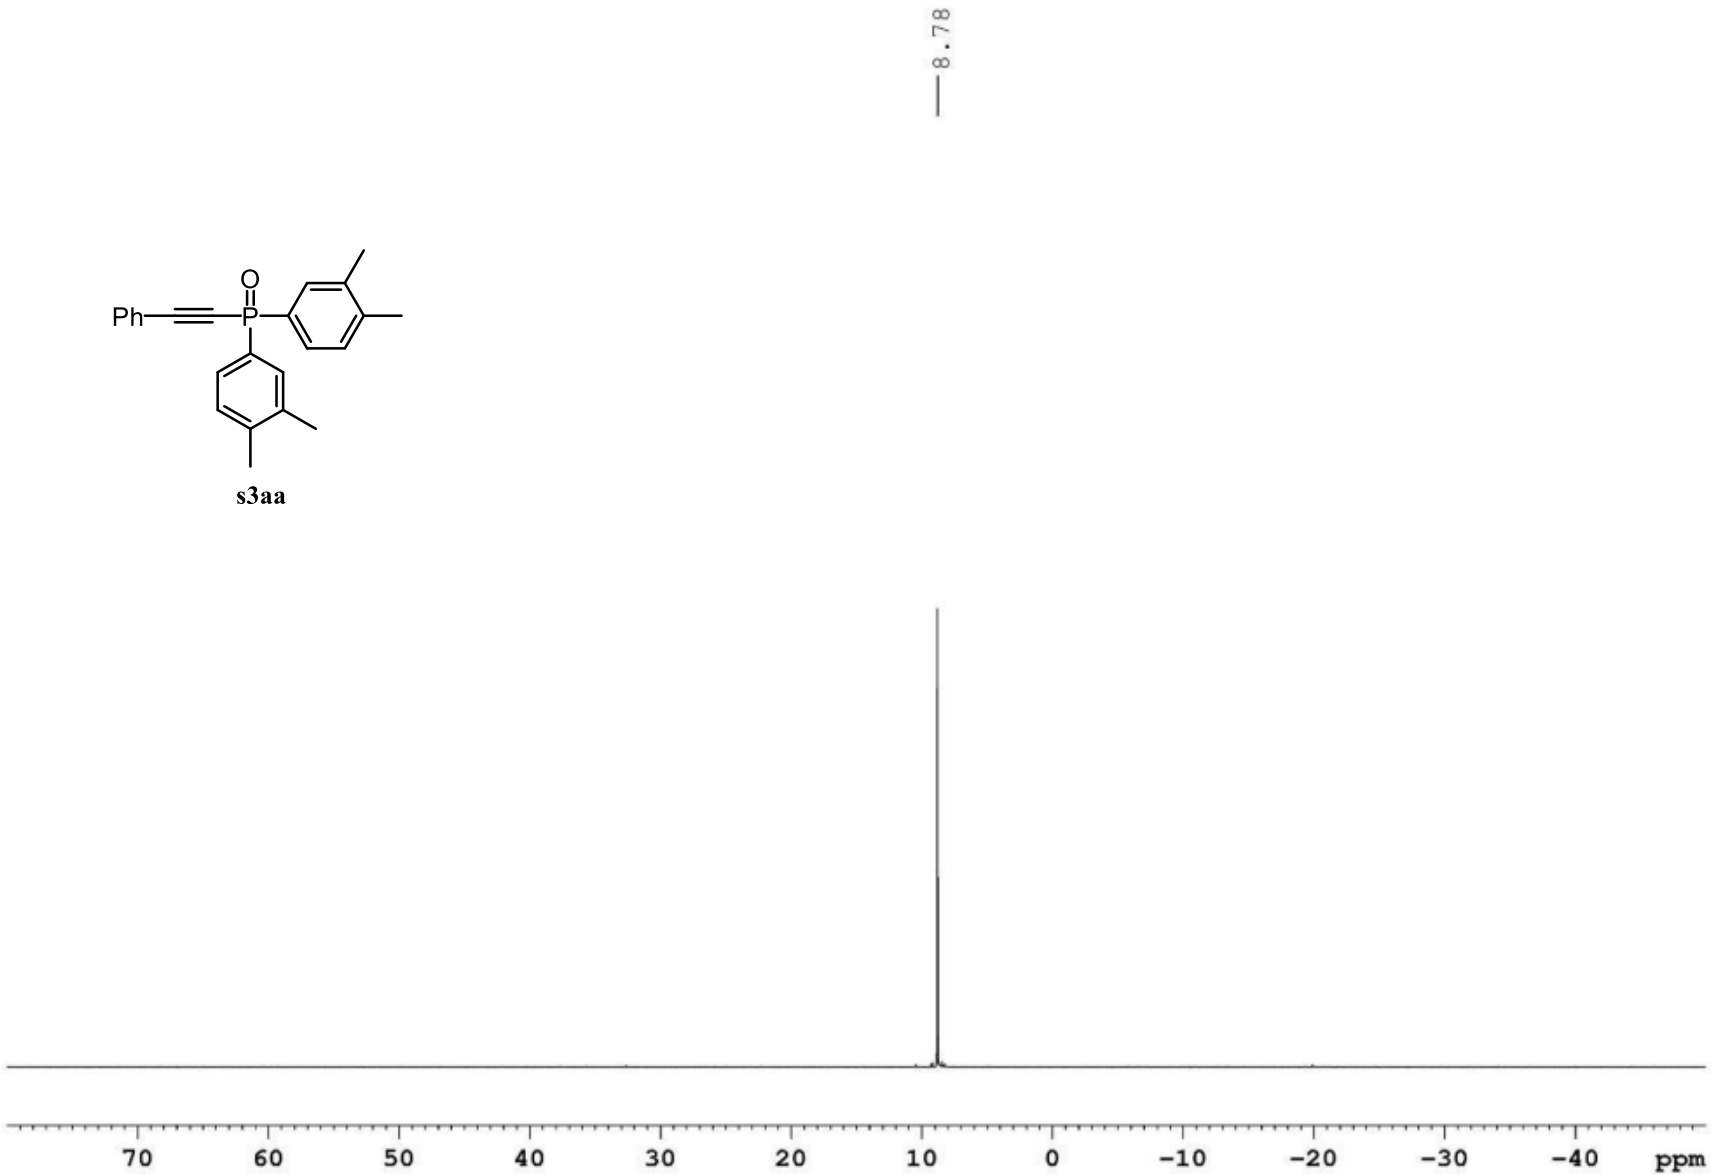

S80

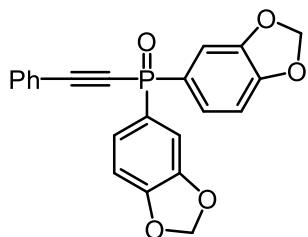

**s3ab**

7.57  
7.55  
7.46  
7.44  
7.43  
7.41  
7.36  
7.34  
7.32  
7.26  
7.23  
6.90  
6.88  
— 5.99

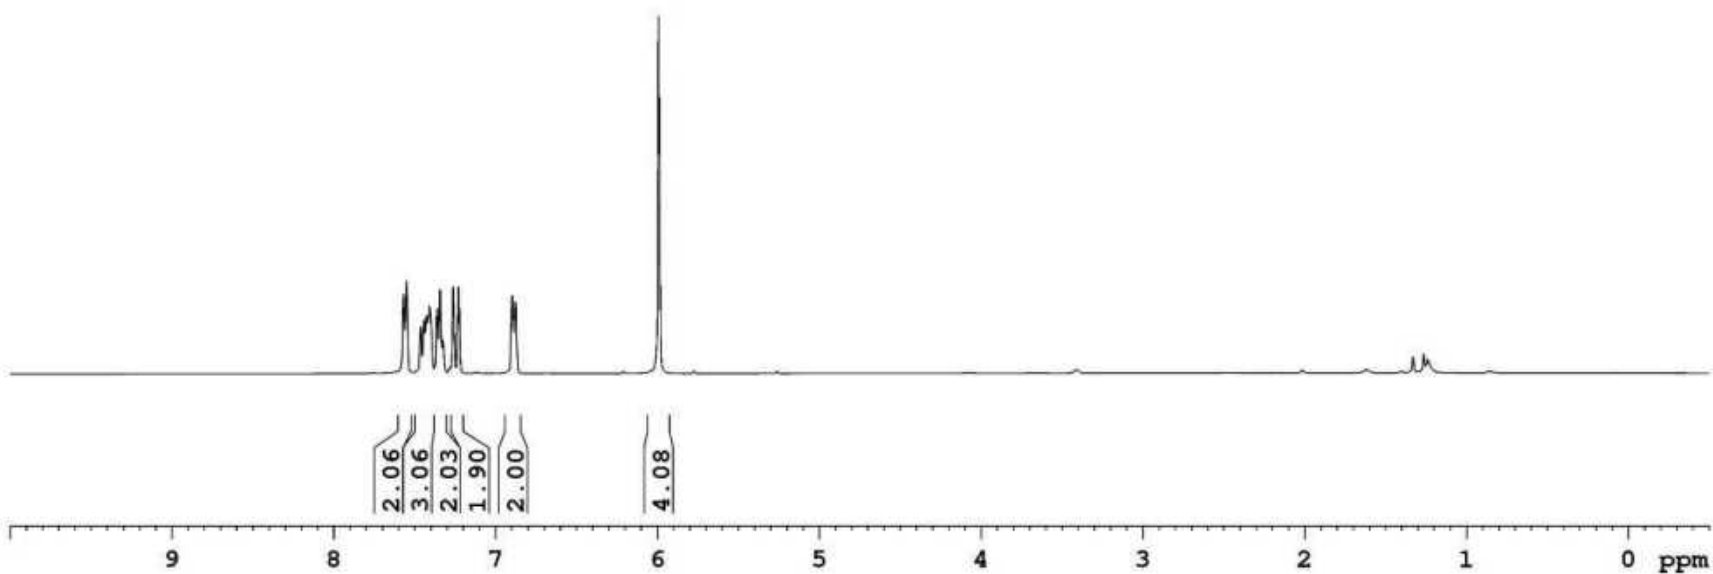



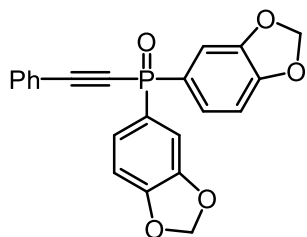

**s3ab**

151.17  
151.14  
148.16  
147.96  
132.49  
132.48  
130.72  
128.59  
126.83  
126.55  
126.43  
125.56  
119.89  
119.85  
110.44  
110.30  
108.85  
108.68  
105.20  
104.89  
101.76  
83.83  
82.12

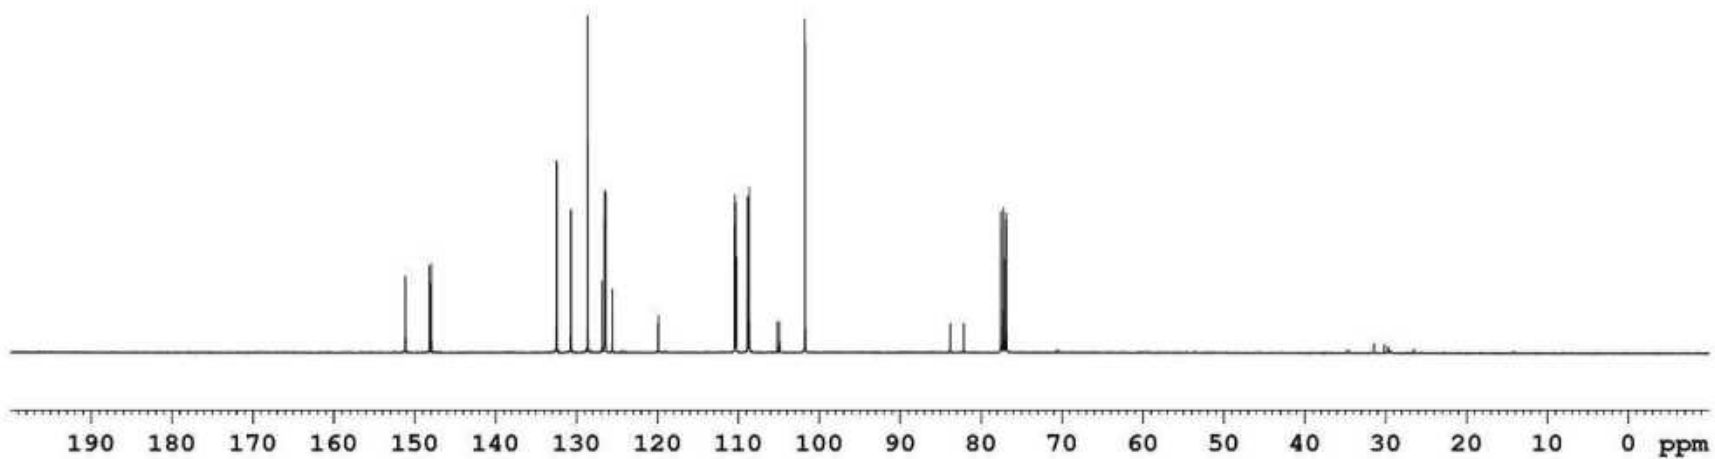

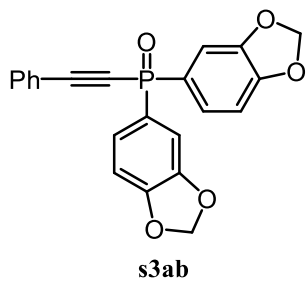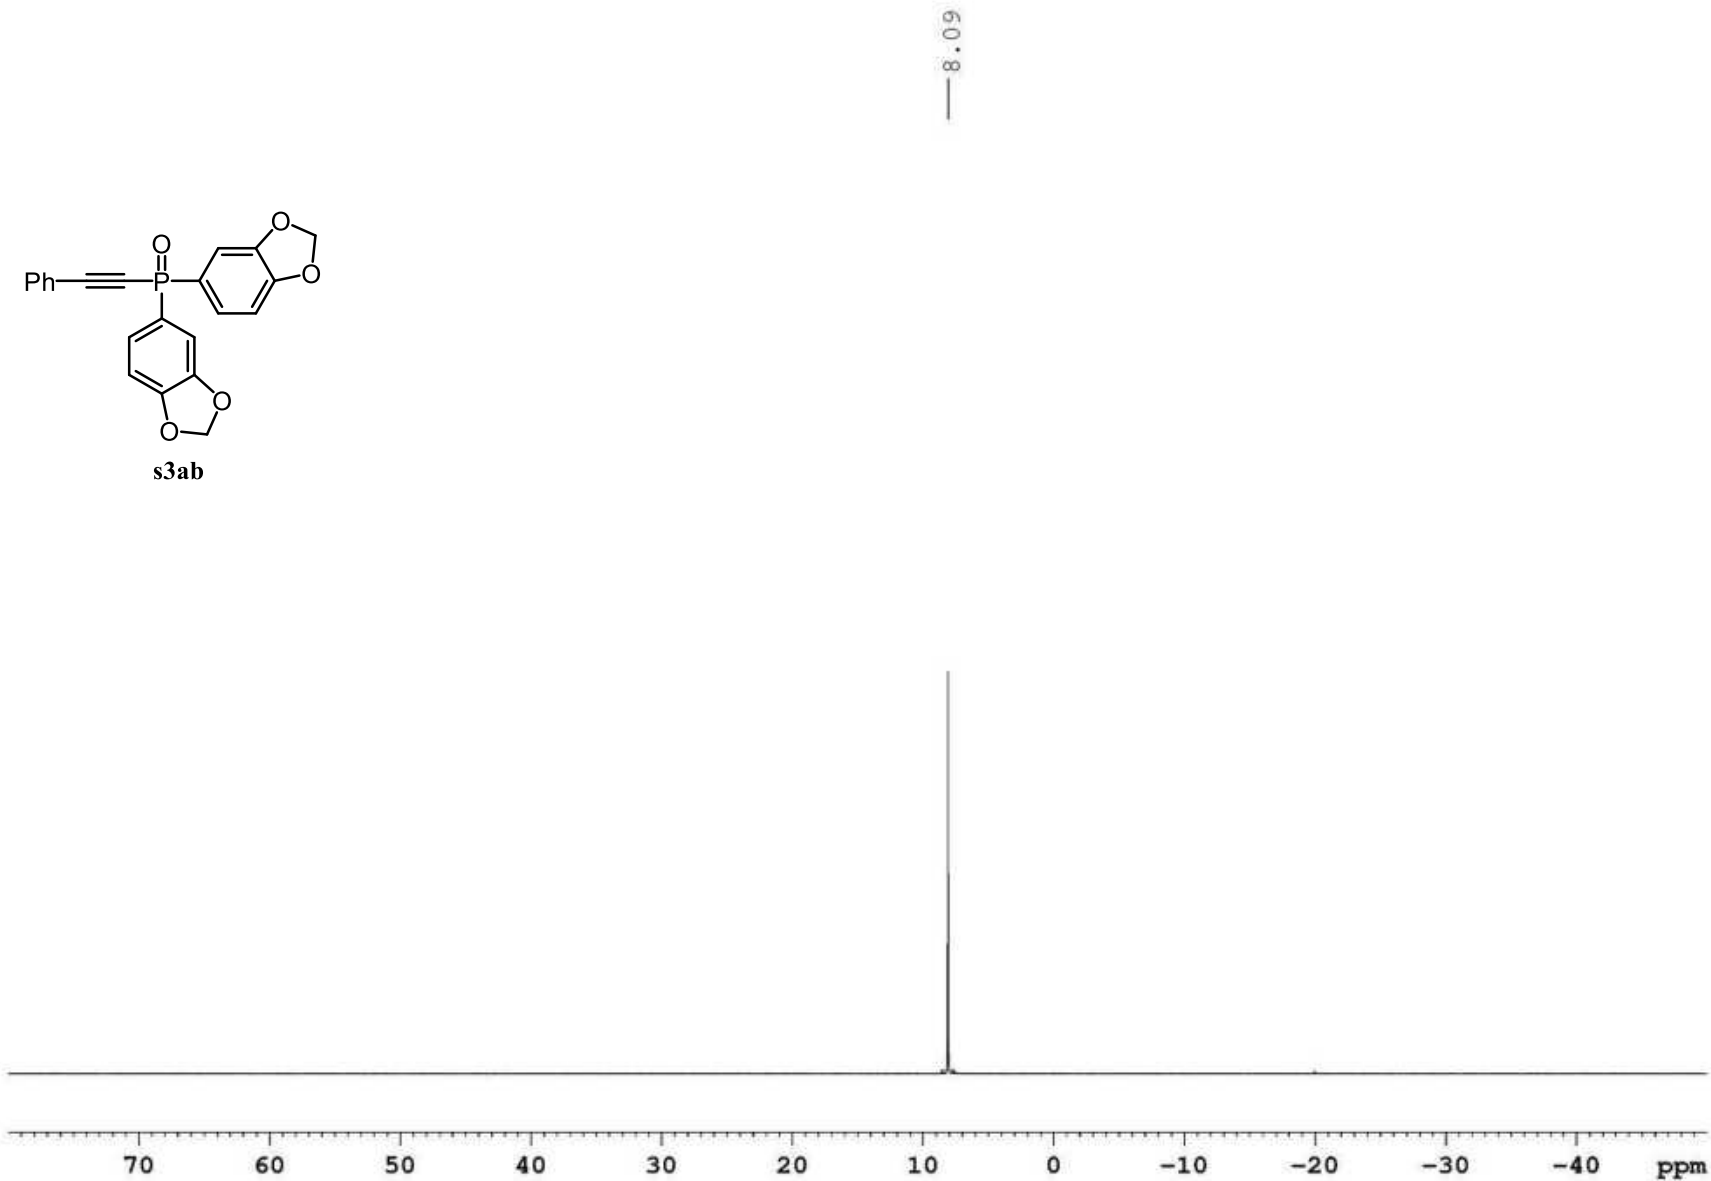

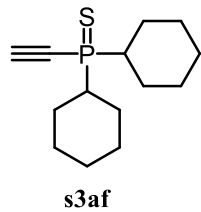

— 7.26

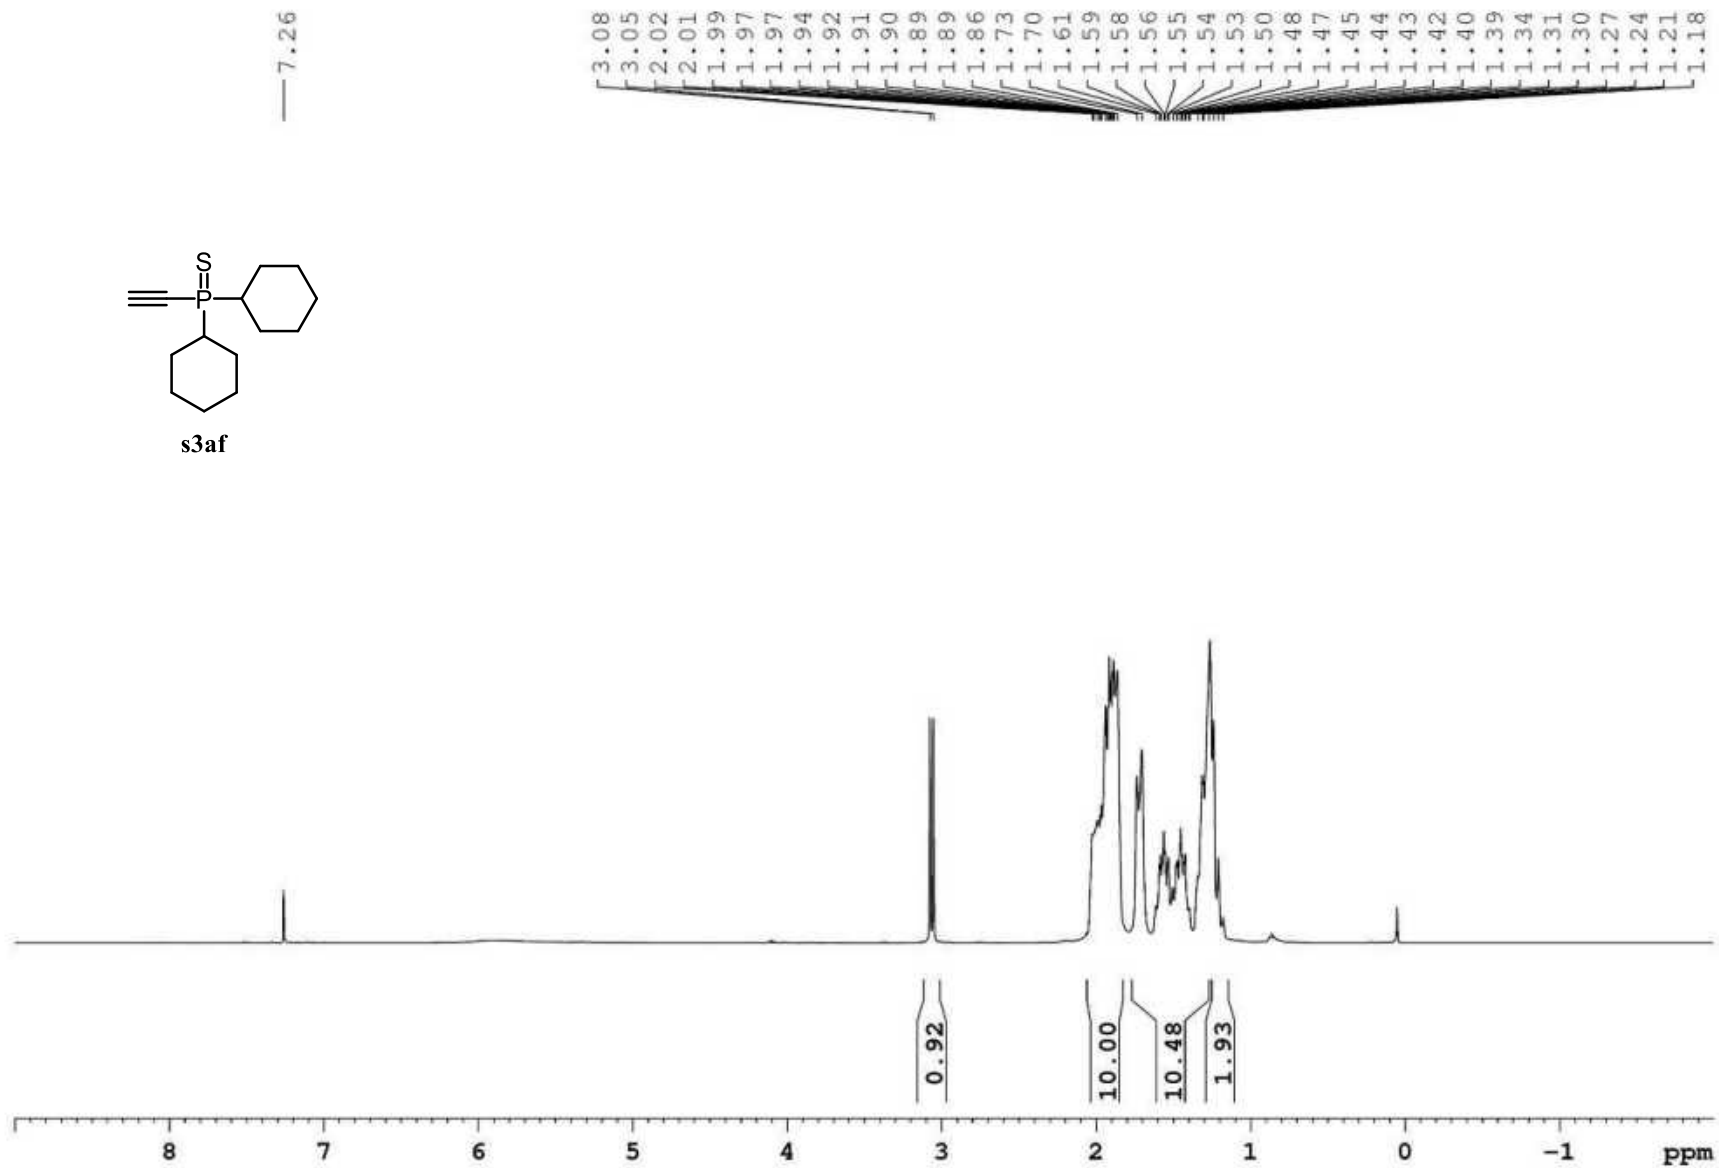

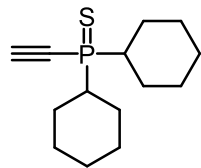

s3af

92.72  
92.56

76.81  
75.69

38.73  
38.15  
26.30  
26.26  
26.19  
26.16  
26.04  
25.67  
25.66  
24.85  
24.83

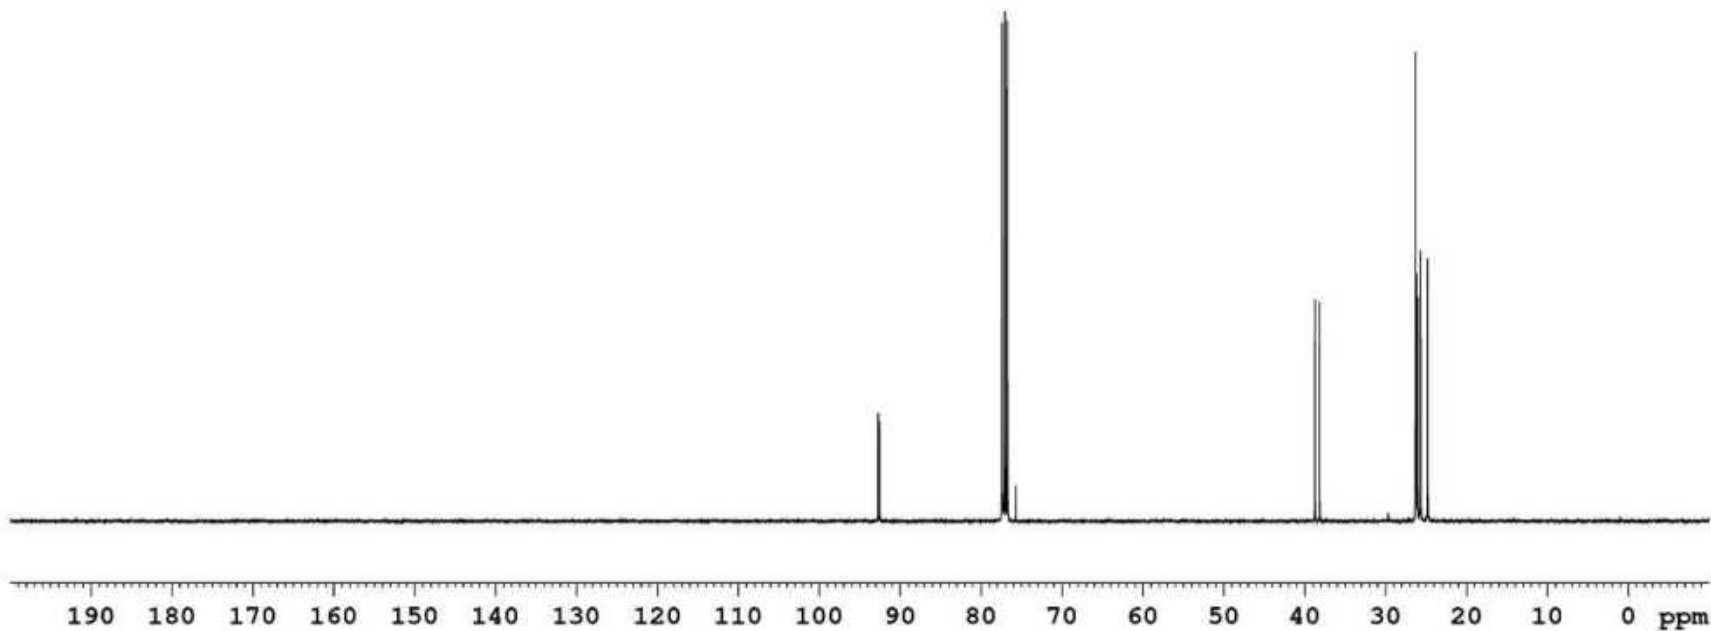



s3af

— 46.07

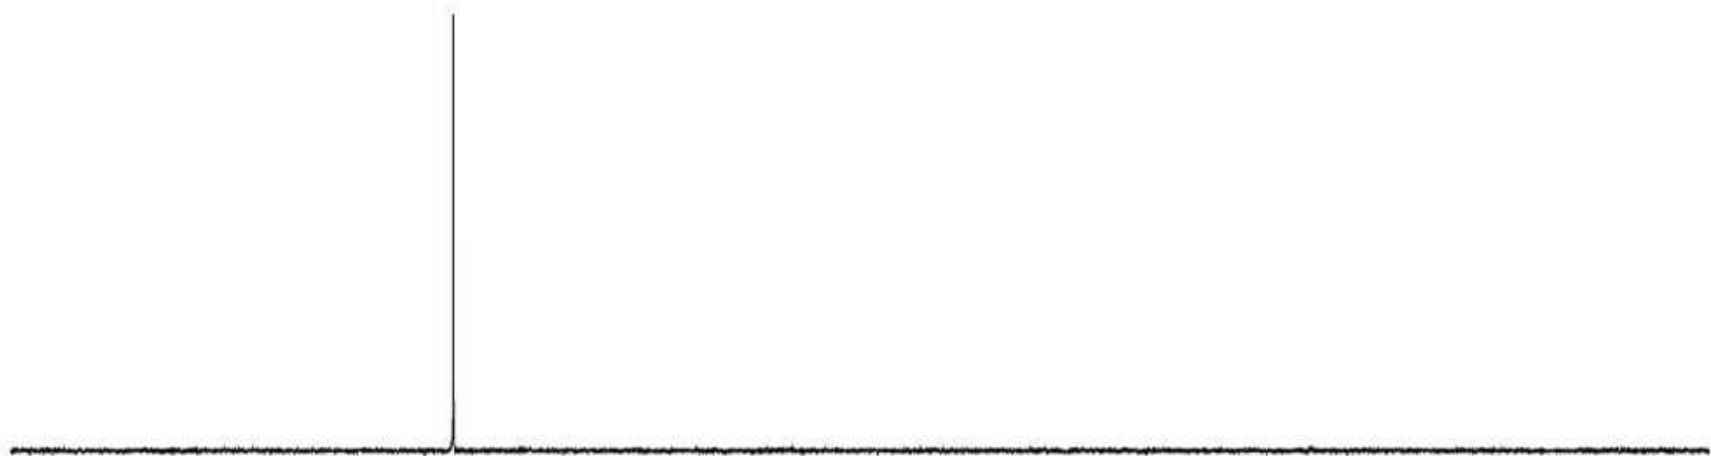

70 60 50 40 30 20 10 0 -10 -20 -30 -40 ppm

7.97  
7.96  
7.95  
7.75  
7.74  
7.54  
7.53  
7.53  
7.52  
7.52  
7.51  
7.50  
7.50  
7.49  
7.49  
7.48  
7.47  
7.46  
7.46  
7.46  
7.45  
7.33  
7.33  
7.32  
7.31  
7.26  
7.25  
7.25  
7.23  
7.23

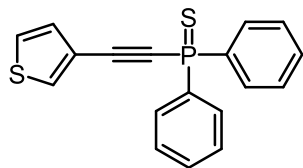

s3ai

8.02  
8.01  
8.00  
7.99  
7.98  
7.97  
7.96  
7.95  
7.75  
7.74  
7.53  
7.52  
7.52  
7.51  
7.50  
7.50  
7.49  
7.49  
7.48  
7.47  
7.46  
7.46  
7.46  
7.45  
7.33  
7.33  
7.32  
7.31  
7.26  
7.25  
7.25  
7.23  
7.23

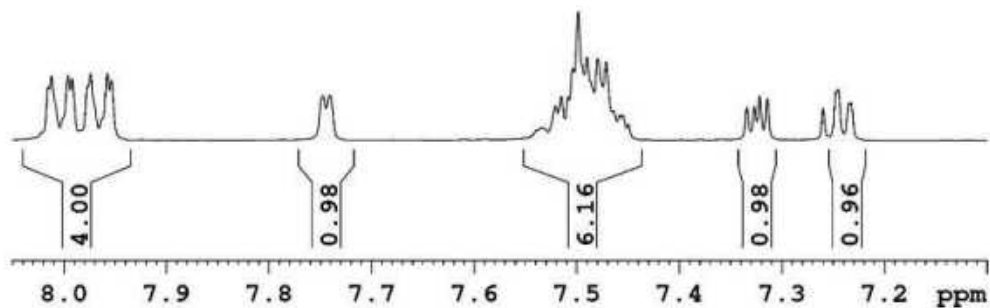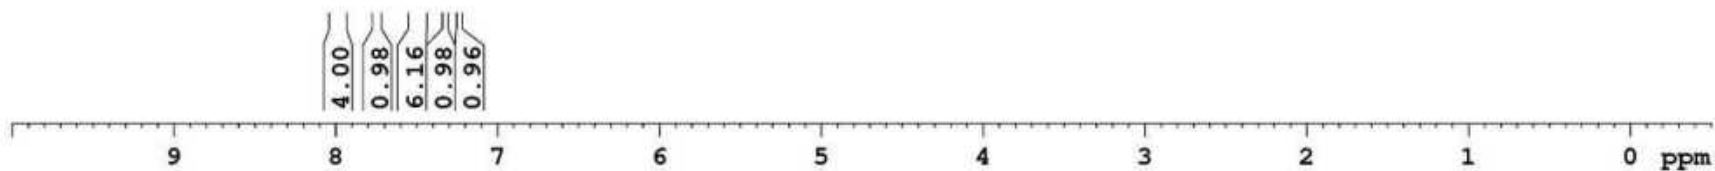

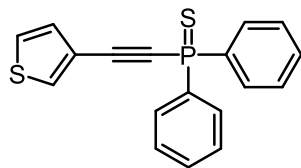

s3ai

134.23  
133.25  
133.09  
133.07  
131.87  
131.84  
130.99  
130.86  
129.91  
129.90  
128.77  
128.63  
126.13  
119.50  
119.46  
101.34  
101.07

82.54  
81.02

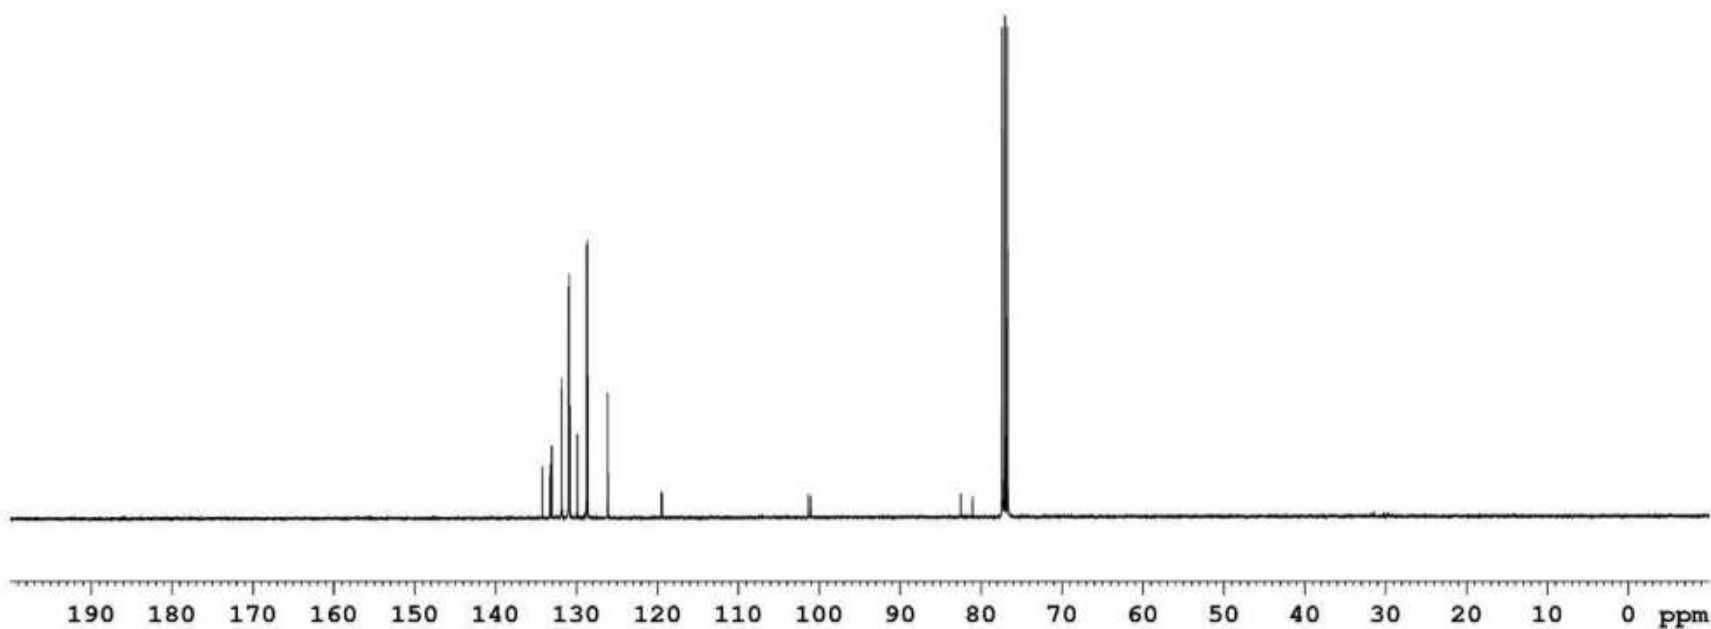

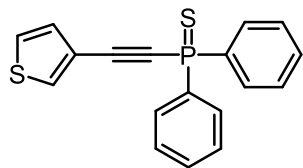

**s3ai**

—20.33

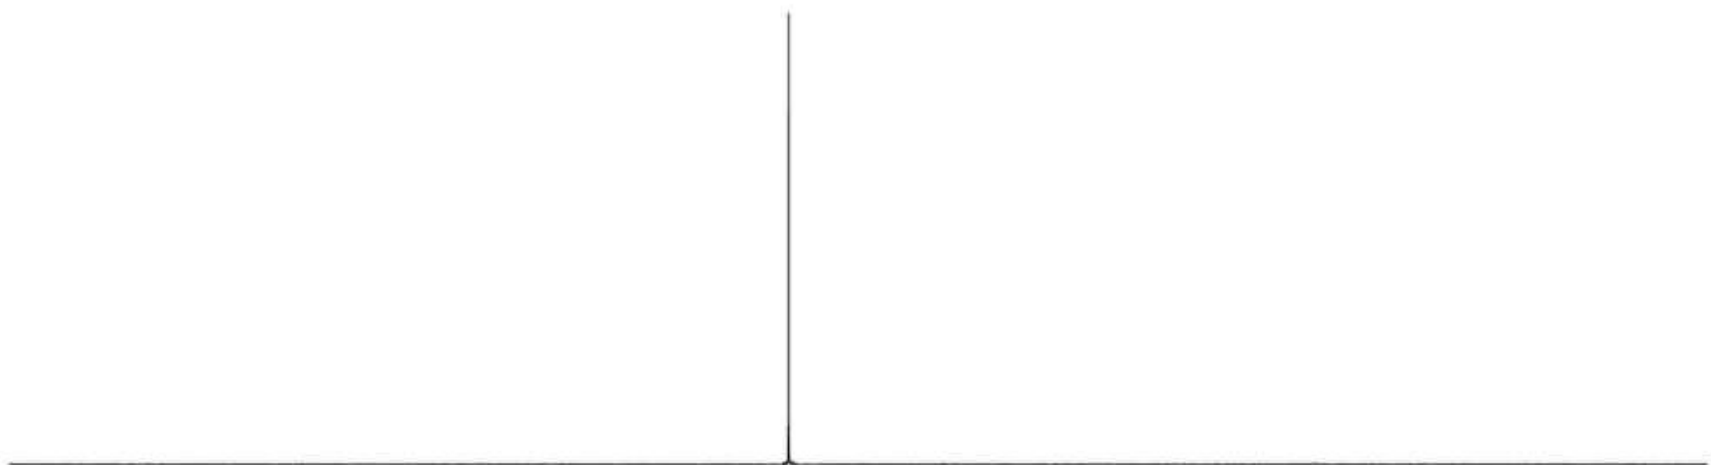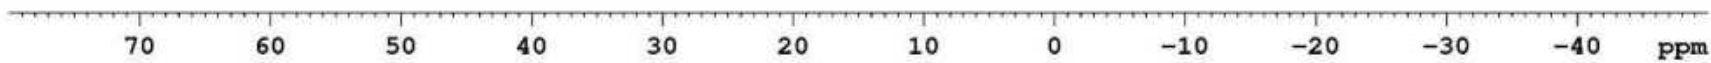



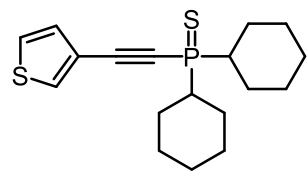

s3aj

7.65  
7.31  
7.30  
7.29  
7.26  
7.18  
7.17

2.08  
2.02  
1.99  
1.97  
1.88  
1.76  
1.75  
1.73  
1.71  
1.61  
1.56  
1.53  
1.50  
1.48  
1.48  
1.45  
1.37  
1.33  
1.30  
1.28  
1.26

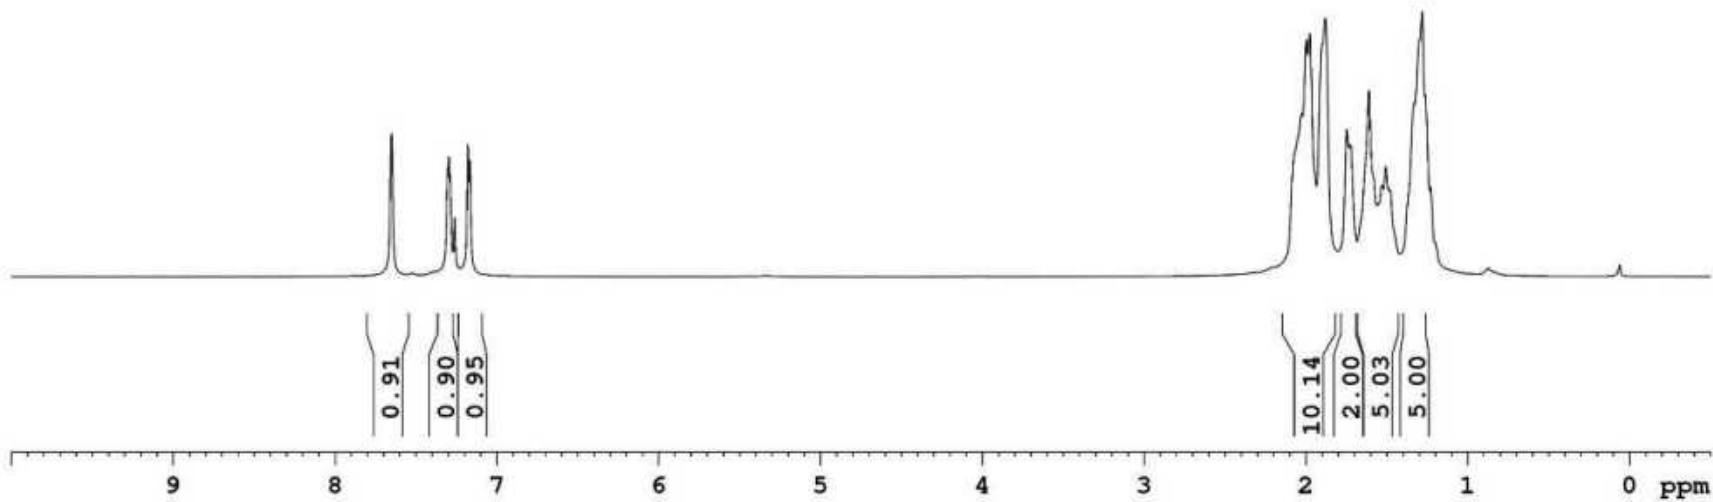

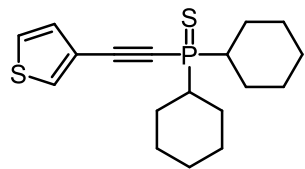

s3aj

132.36  
132.34  
129.94  
125.93  
119.81  
119.77

99.34  
99.16

80.48  
79.27

39.16  
38.57  
26.52  
26.48  
26.41  
26.27  
26.12  
25.77  
25.76  
25.11  
25.09

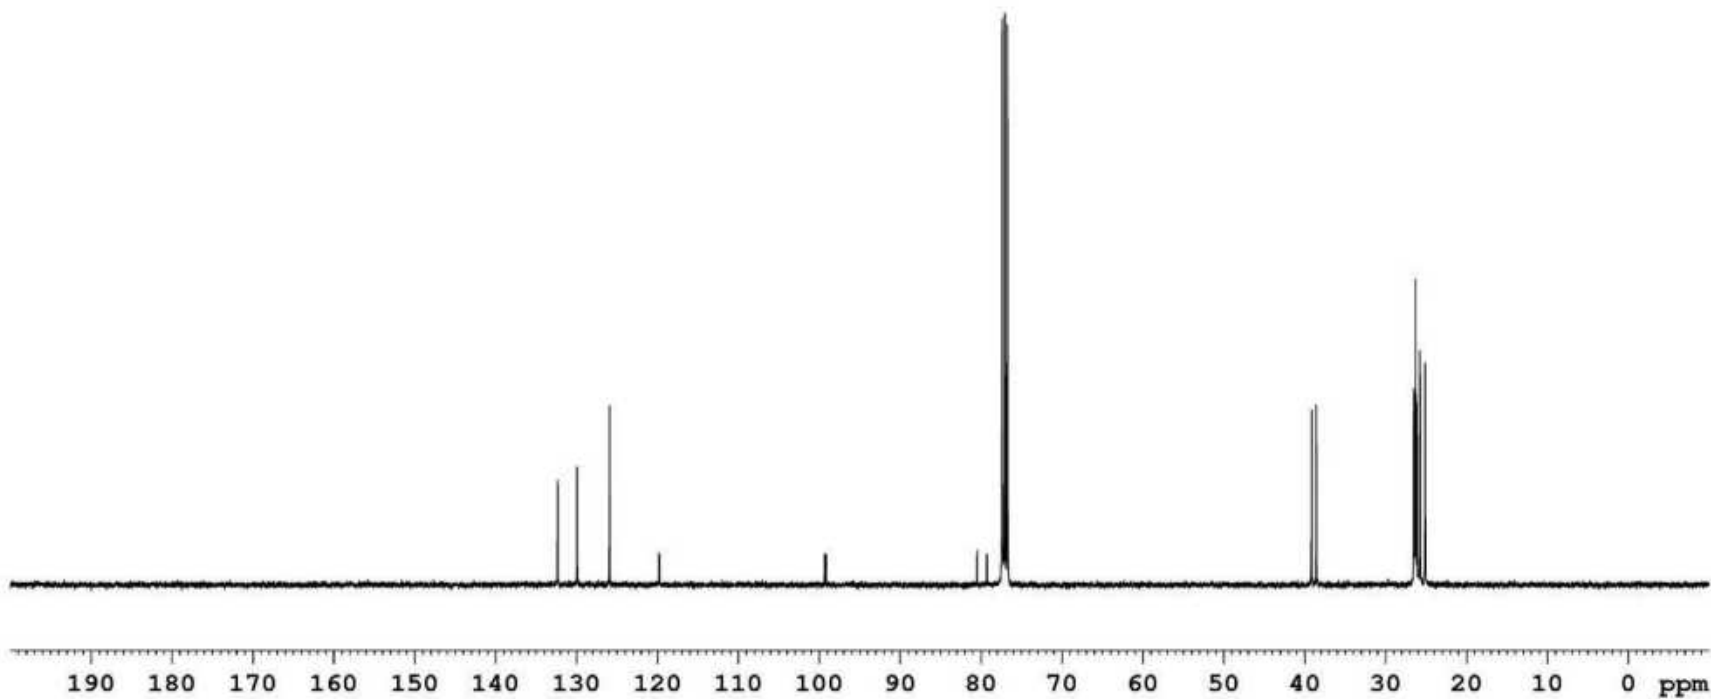

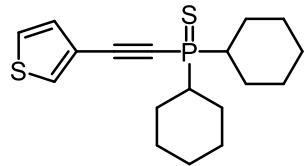

s3aj

— 45.13

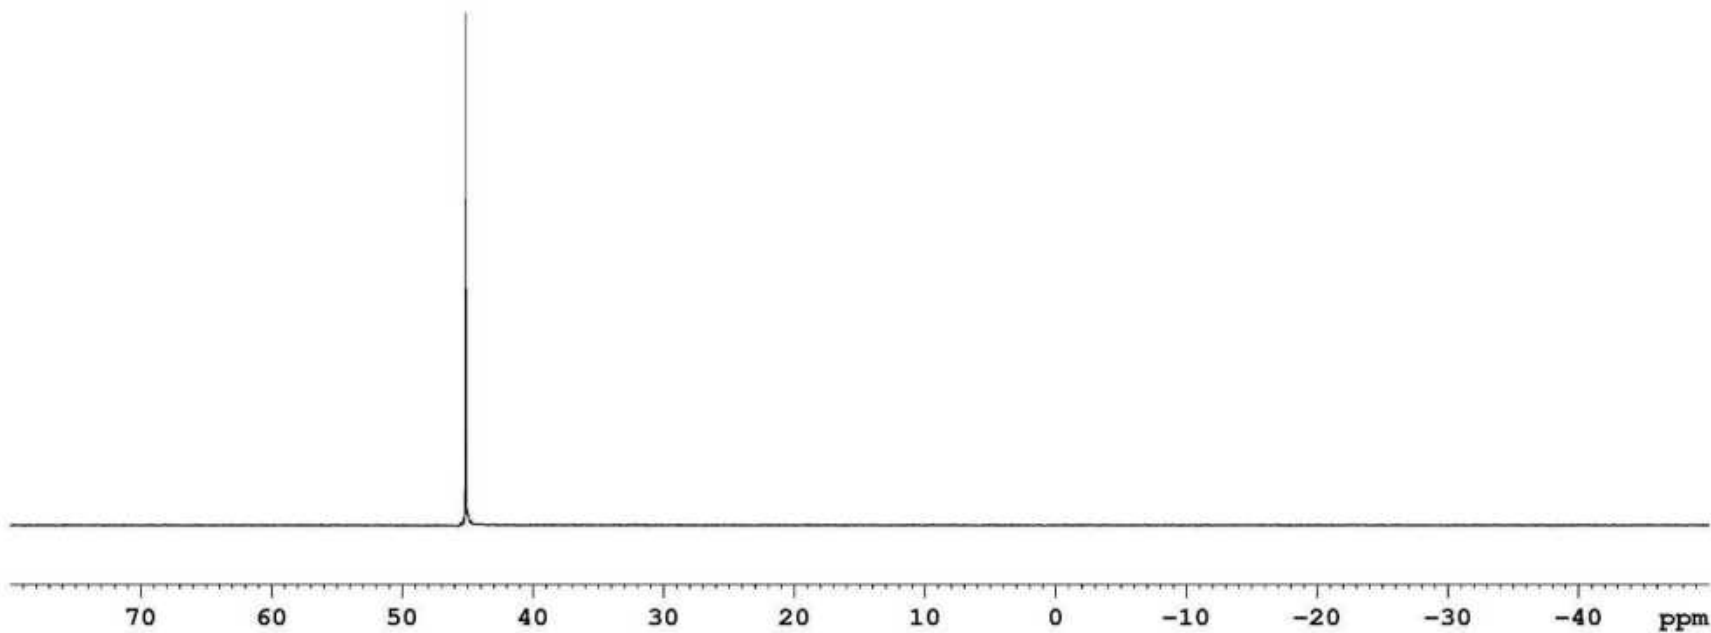

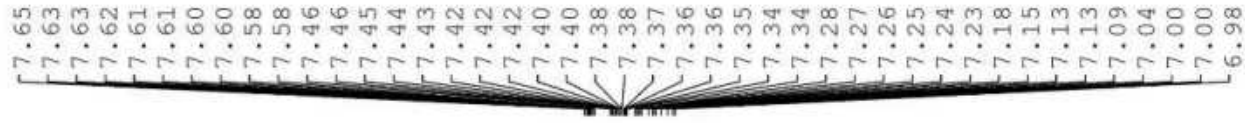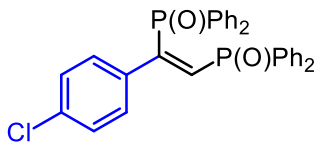

4a

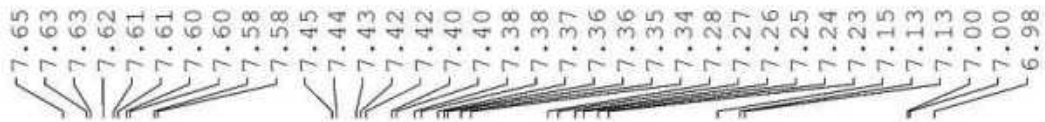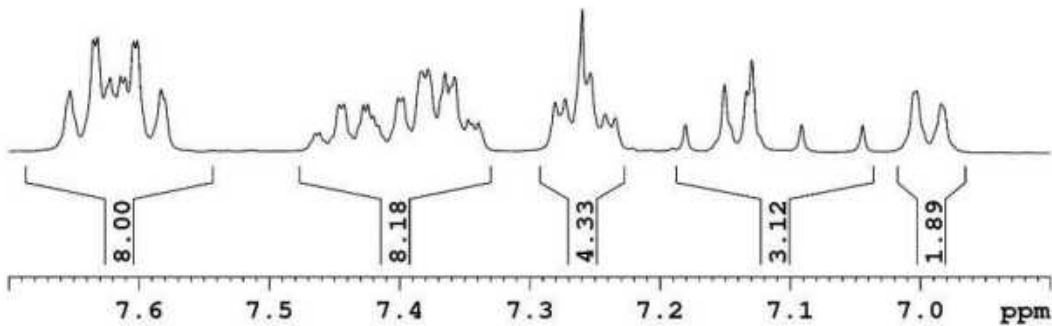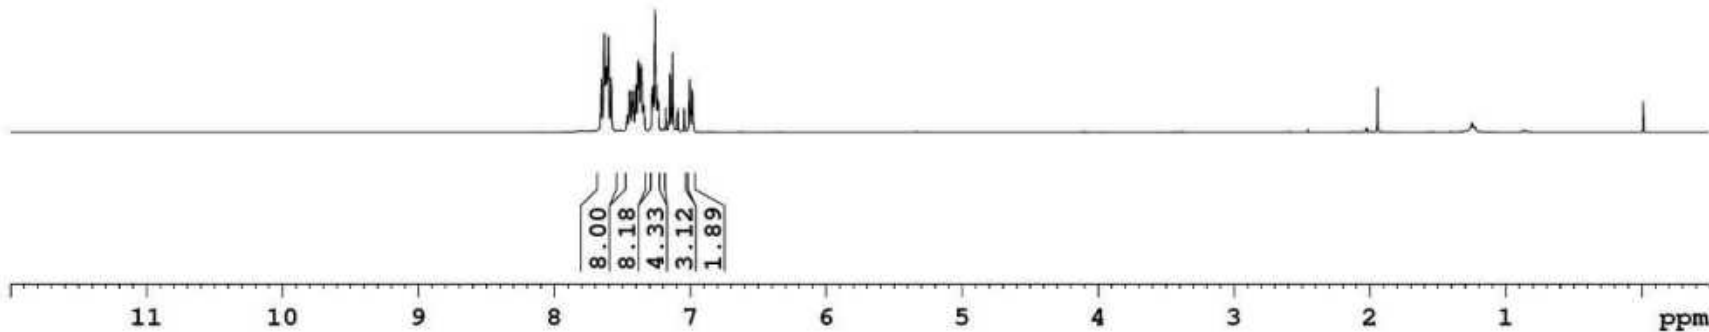

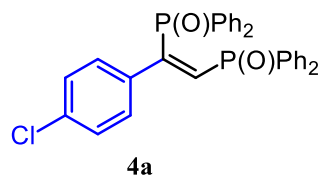

156.43  
 155.60  
 141.83  
 141.75  
 140.92  
 140.83  
 138.91  
 138.81  
 138.74  
 138.64  
 134.76  
 134.75  
 134.29  
 133.22  
 132.39  
 132.29  
 132.12  
 132.10  
 131.70  
 131.67  
 131.36  
 130.87  
 130.77  
 130.31  
 129.78  
 129.74  
 128.60  
 128.48  
 128.39  
 128.25  
 128.12

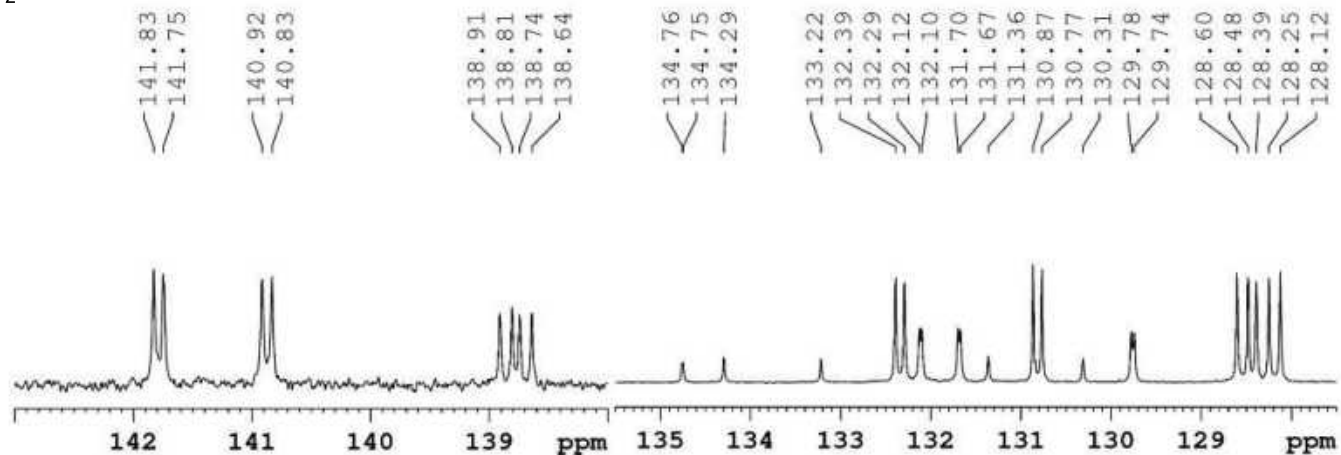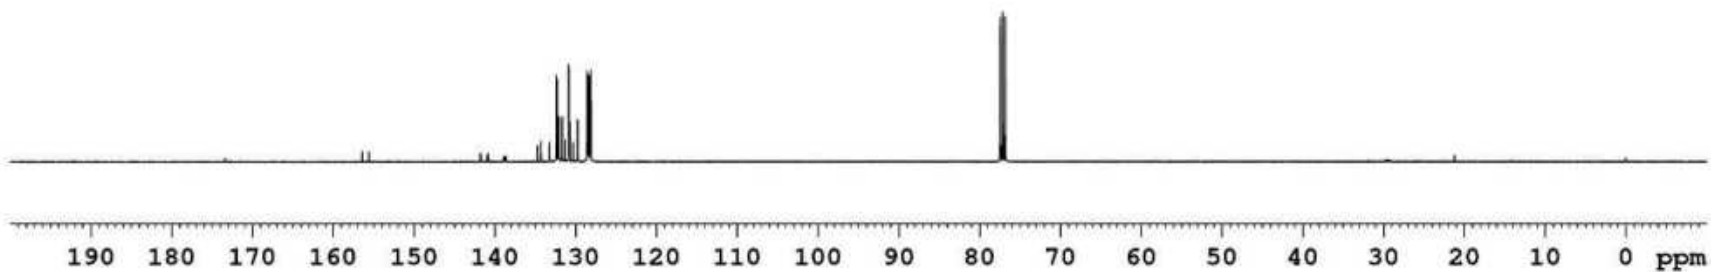

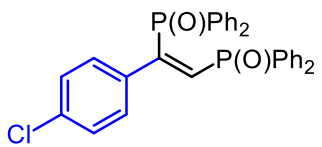

4a

25.61  
25.53

18.53  
18.45

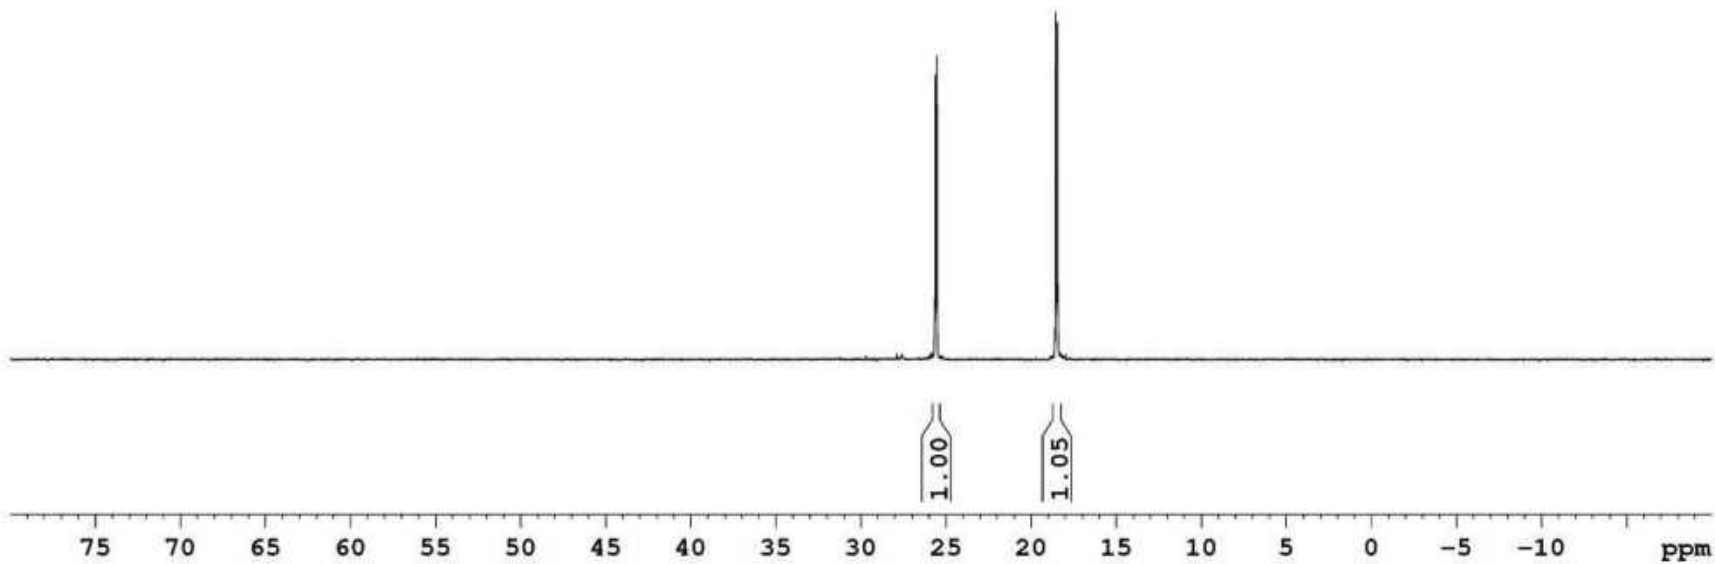

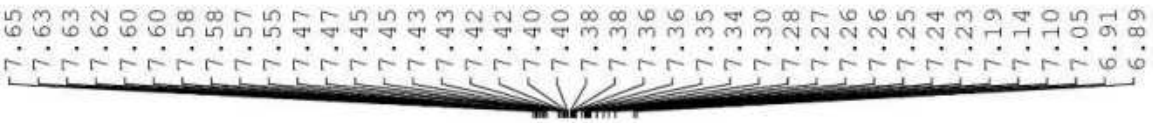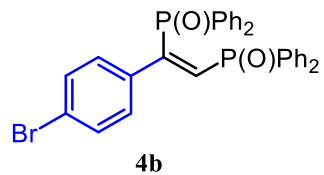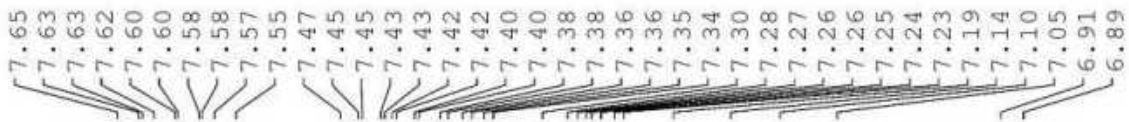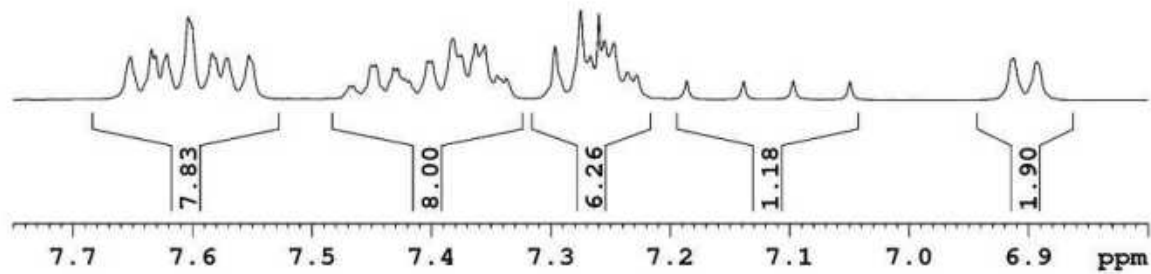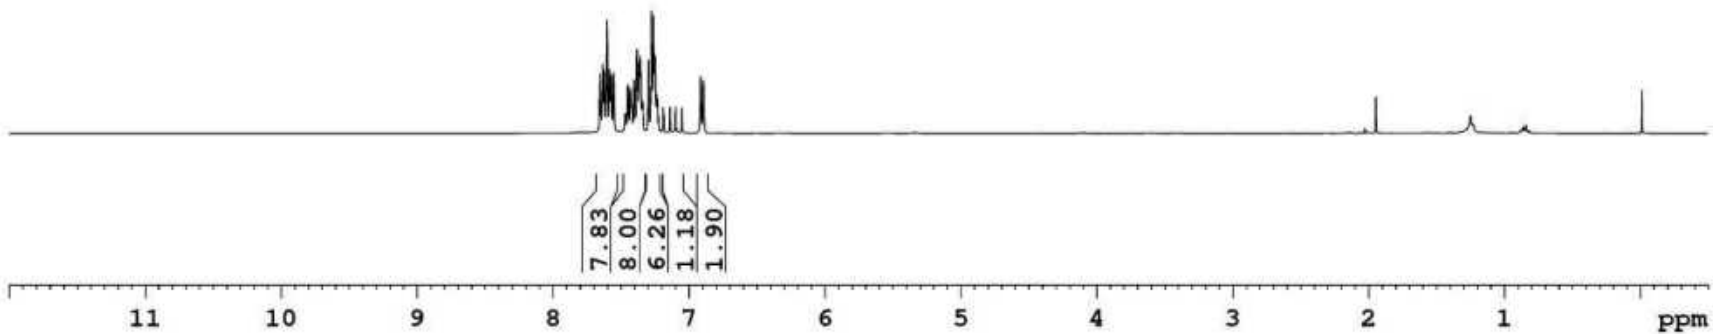

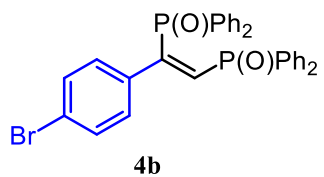

156.54  
 155.71  
 141.94  
 141.86  
 141.03  
 140.95  
 139.28  
 139.17  
 139.11  
 139.01  
 134.15  
 133.07  
 132.31  
 132.21  
 132.17  
 131.77  
 131.75  
 131.36  
 131.22  
 130.84  
 130.74  
 130.17  
 130.01  
 129.97  
 128.66  
 128.54  
 128.31  
 128.19  
 123.04  
 123.03

141.94  
 141.86

141.03  
 140.95

139.28  
 139.17  
 139.11  
 139.01

134.15

133.07  
 132.31  
 132.21  
 132.17  
 131.77  
 131.75  
 131.36  
 131.22  
 130.84  
 130.74  
 130.17  
 130.01  
 129.97

128.66  
 128.54  
 128.31  
 128.19

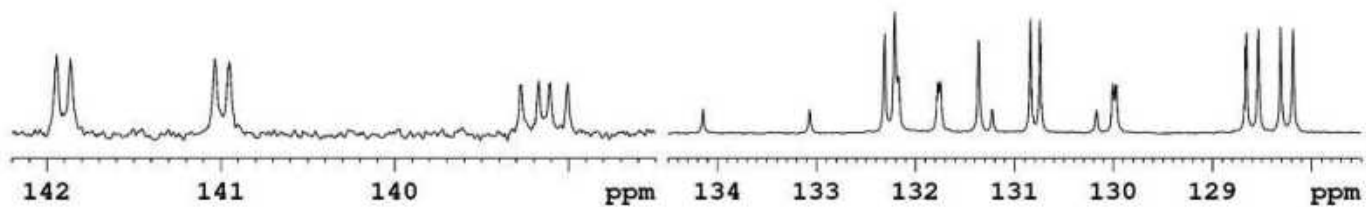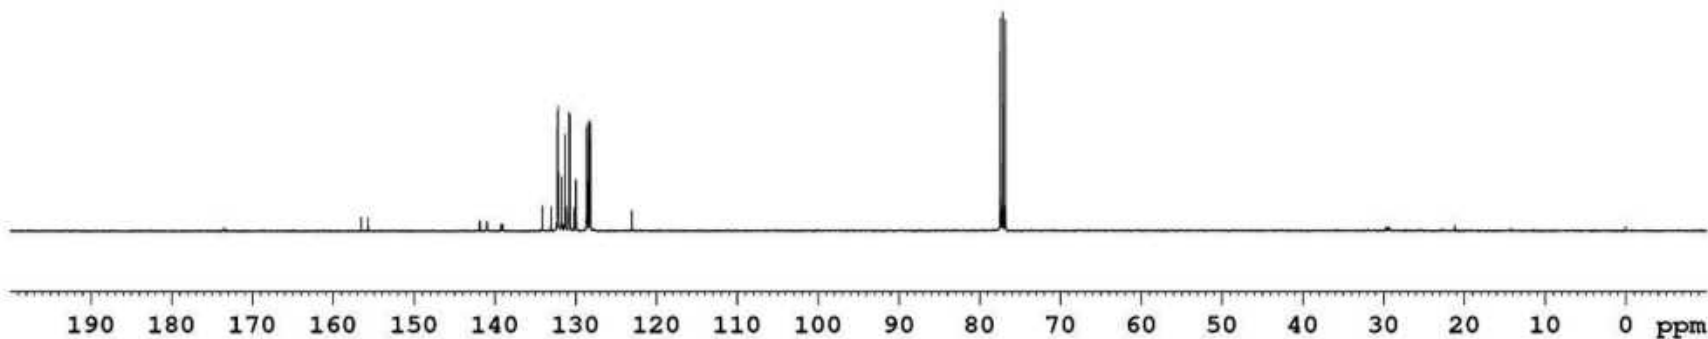



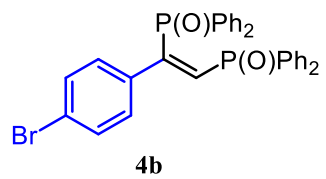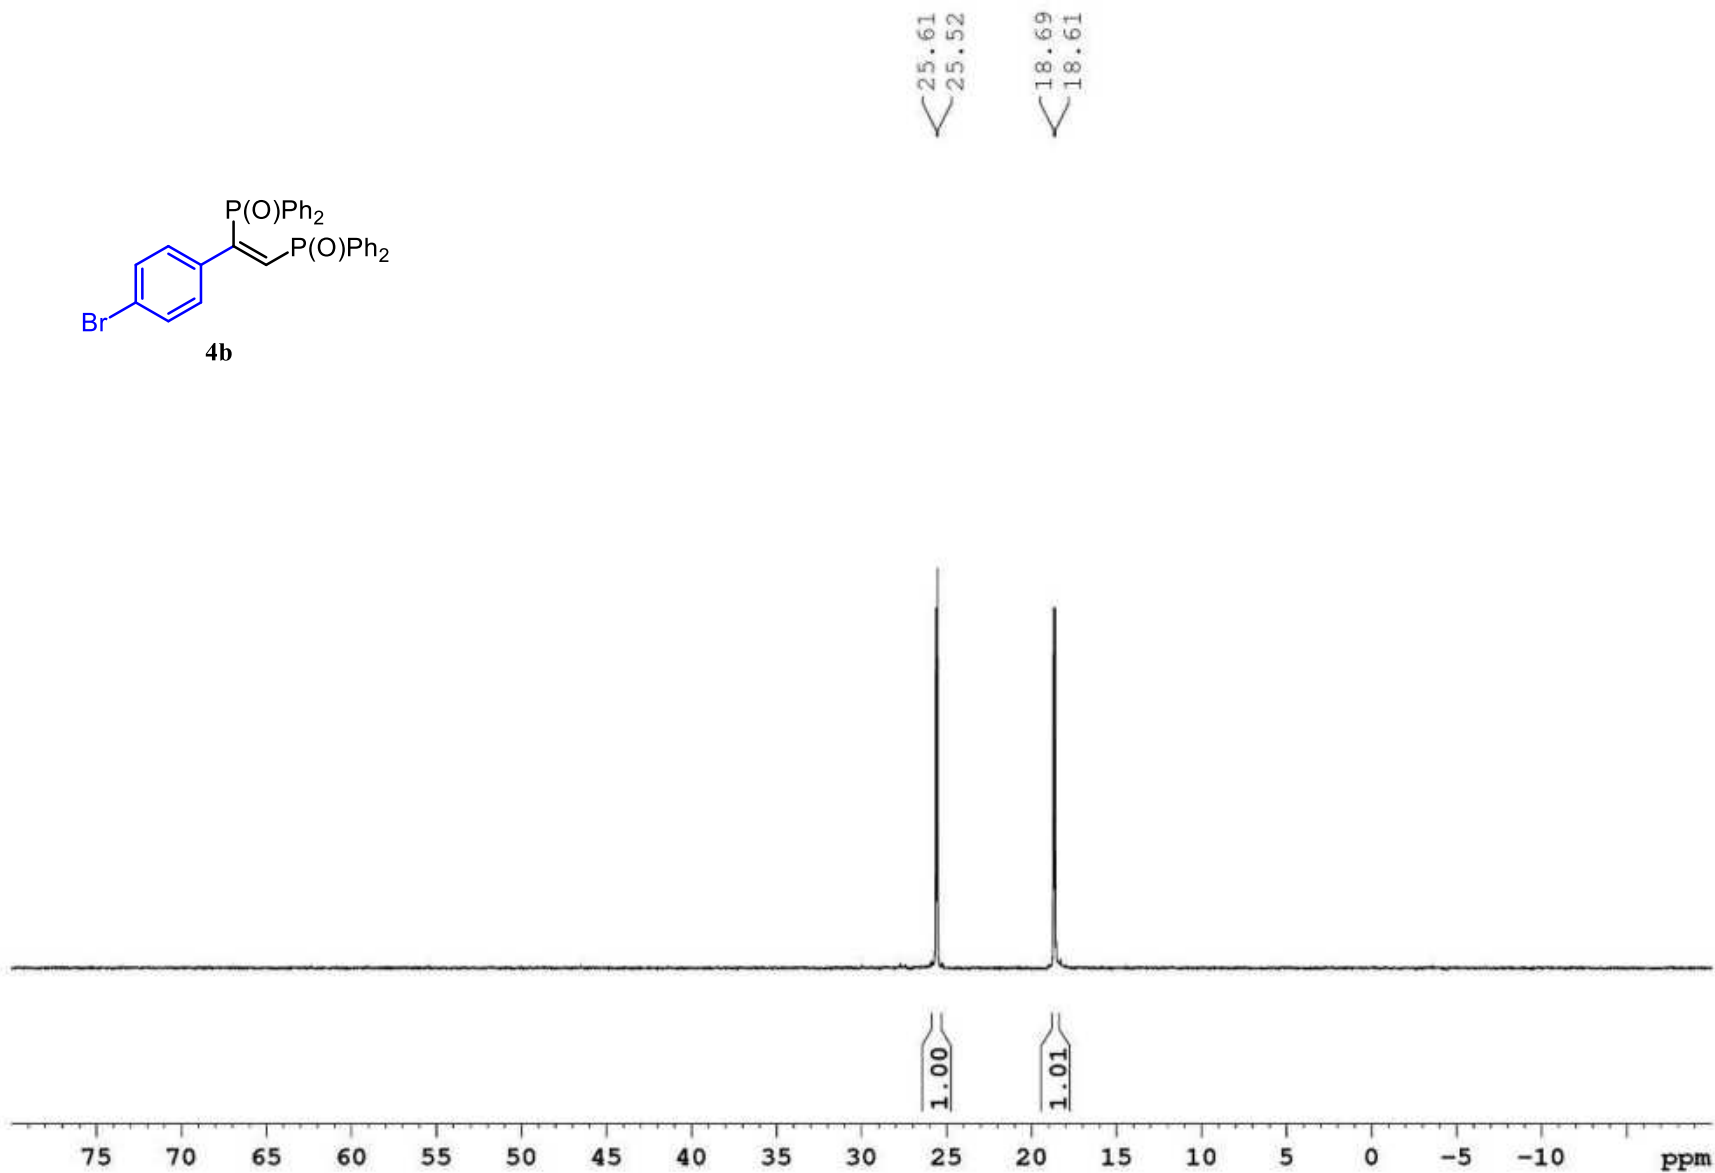

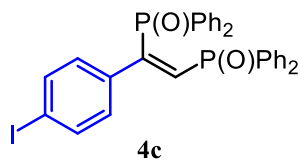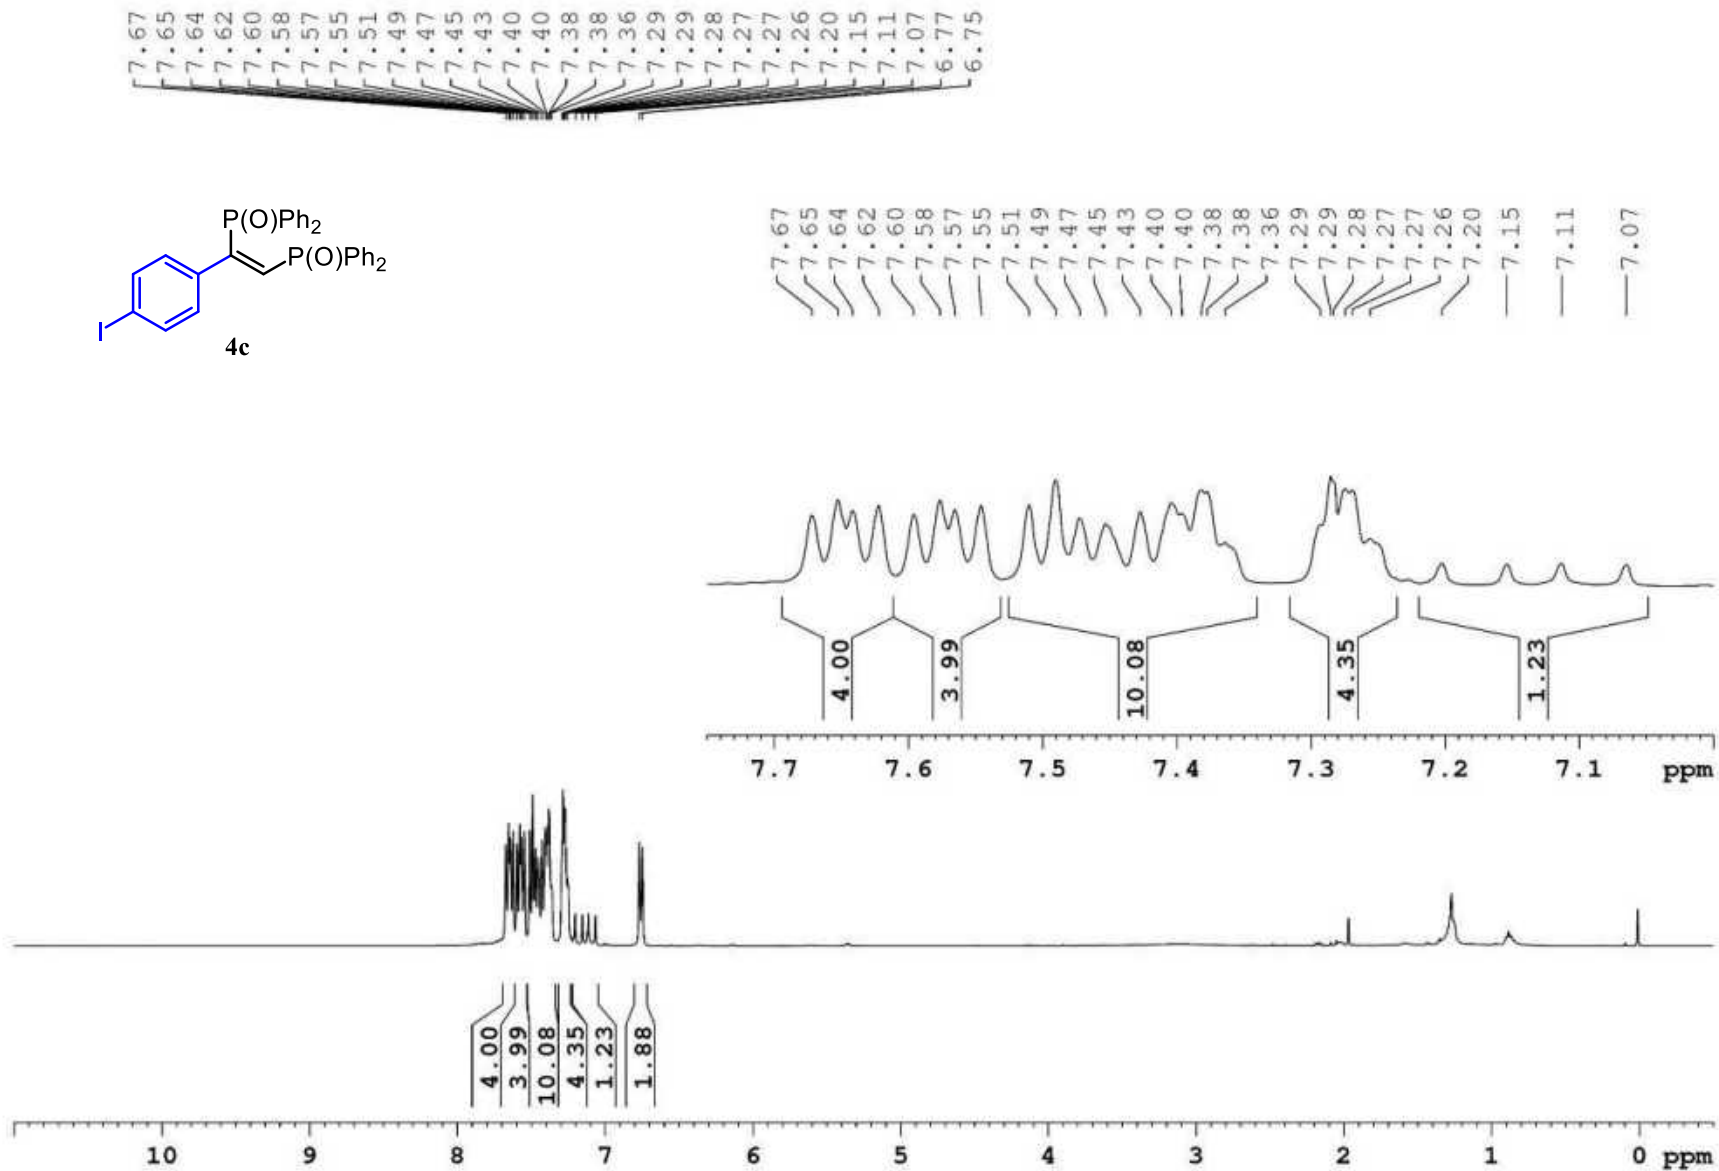

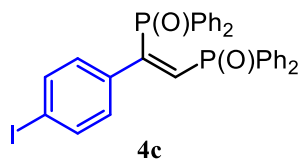

156.69  
155.85  
142.02  
141.94  
141.10  
141.03  
139.77  
139.67  
139.61  
139.50  
137.32  
134.06  
132.98  
132.26  
132.16  
131.82  
131.80  
131.08  
130.82  
130.72  
130.08  
130.05  
128.70  
128.57  
128.36  
128.24  
94.82

142.02  
141.94

141.10  
141.03

139.77  
139.67  
139.61  
139.50

134.06

132.98

132.26  
132.16  
131.82  
131.80

131.08  
130.82  
130.72  
130.08  
130.05

128.70  
128.57  
128.36  
128.24

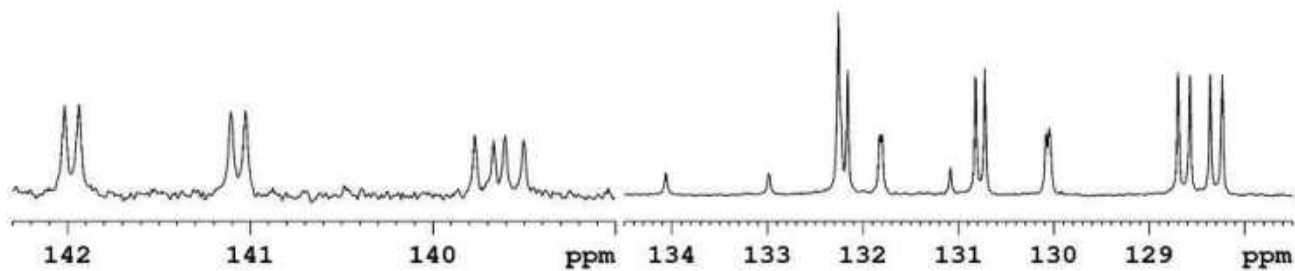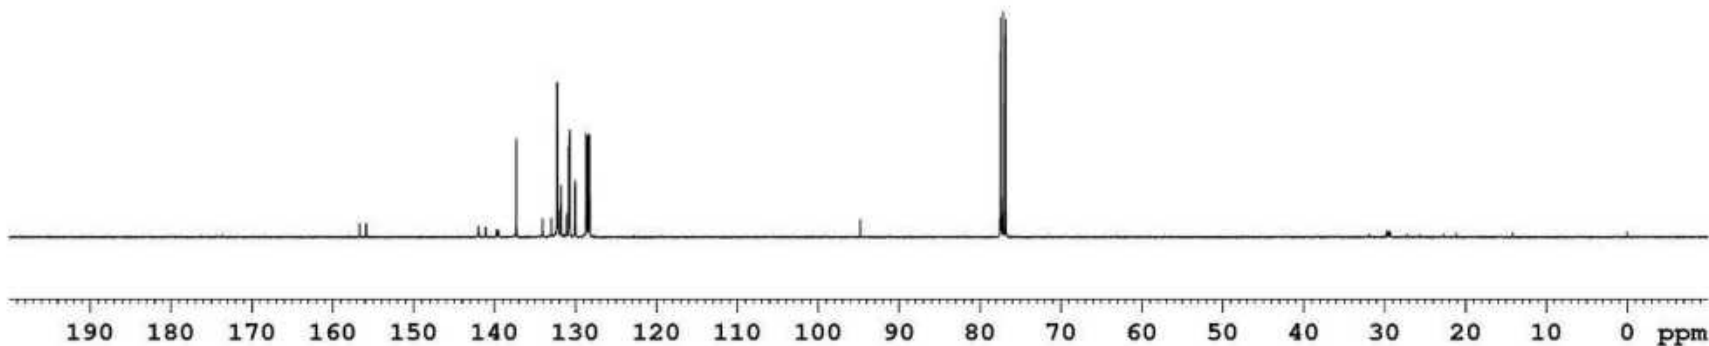



< 25.62  
25.53

< 18.87  
18.78

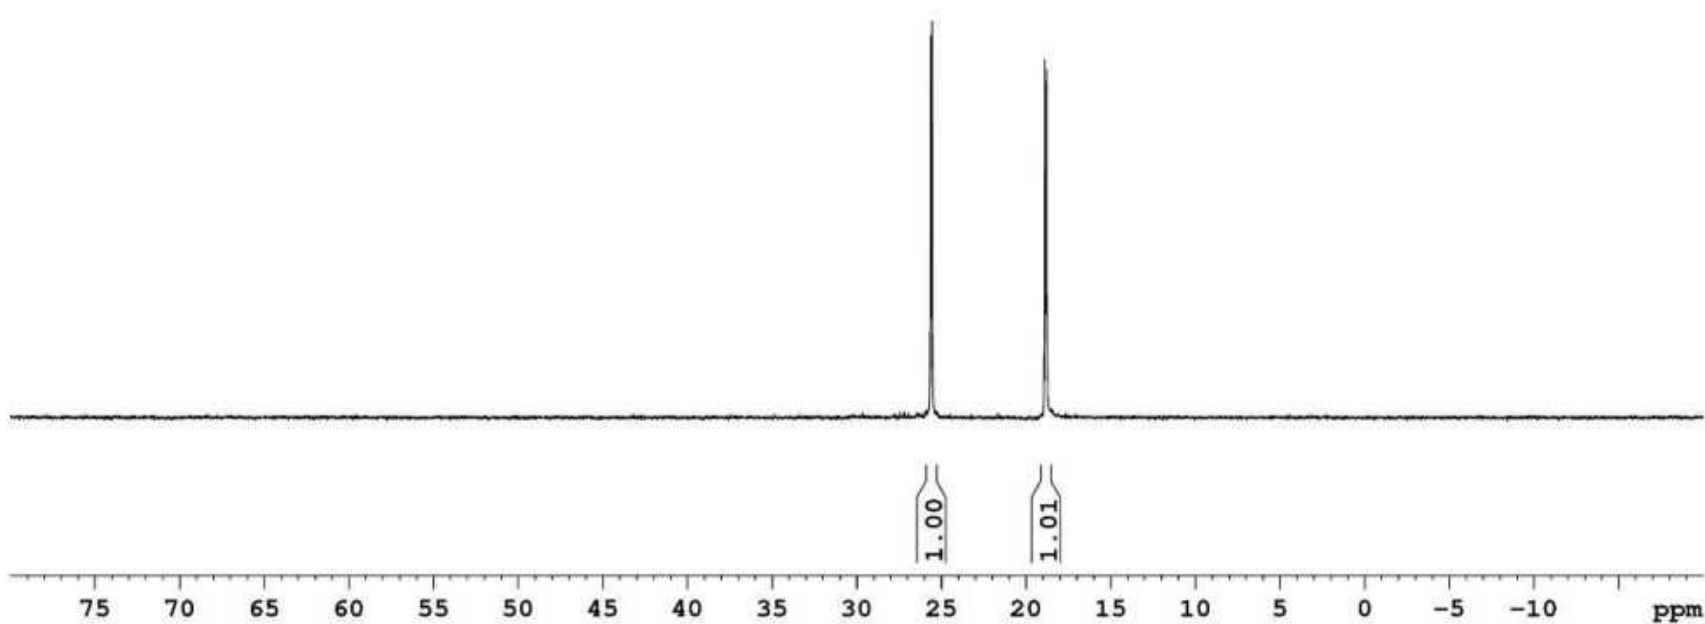

7.75  
7.73  
7.72  
7.70  
7.67  
7.65  
7.64  
7.62  
7.51  
7.49  
7.47  
7.44  
7.43  
7.41  
7.41  
7.40  
7.33  
7.33  
7.31  
7.31  
7.30  
7.29  
7.27  
7.25  
7.21  
7.17  
7.13  
7.08

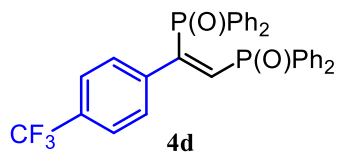

7.75  
7.73  
7.72  
7.70  
7.67  
7.65  
7.64  
7.62

7.51  
7.49  
7.47  
7.44  
7.43  
7.41  
7.41  
7.40  
7.33  
7.33  
7.31  
7.31  
7.30  
7.29  
7.27  
7.25  
7.21  
7.17  
7.13  
7.08

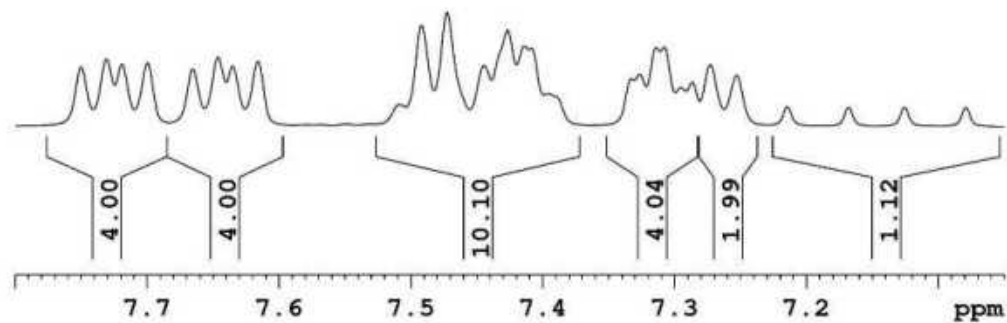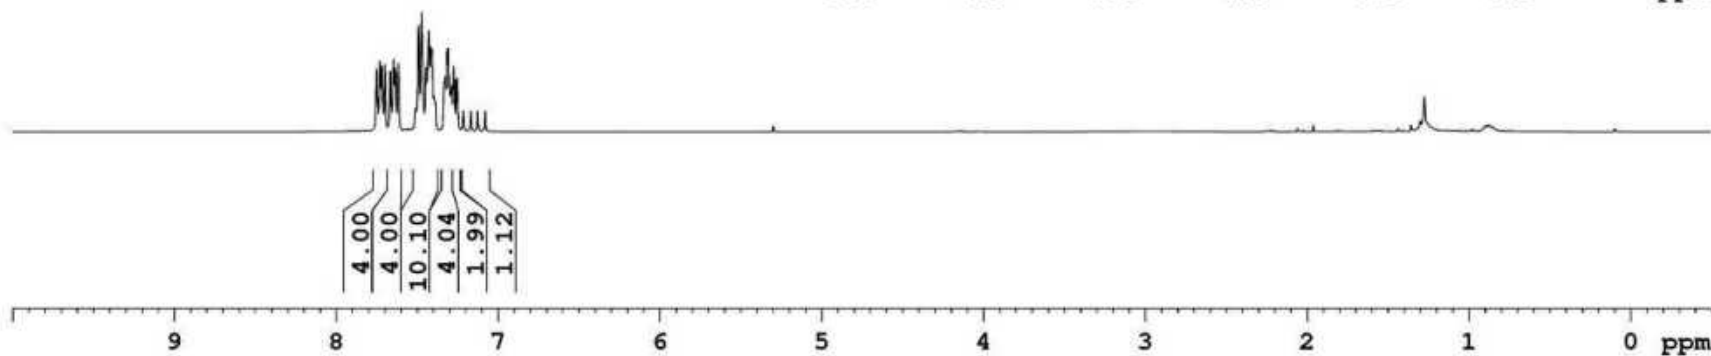

156.50  
155.68  
144.35  
144.26  
144.18  
144.10  
141.95  
141.87  
141.04  
140.96  
134.24  
133.16  
132.56  
132.45  
132.15  
132.13  
131.72  
131.70  
131.35  
130.85  
130.75  
130.57  
130.30  
130.24  
129.91  
128.96  
128.82  
128.79  
128.62  
128.49  
128.21  
128.09  
127.88  
125.17  
125.13  
125.10  
122.46  
119.76

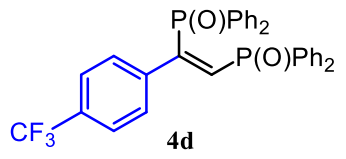

134.24  
133.16  
132.56  
132.45  
132.15  
132.13  
131.72  
131.70  
131.35  
130.85  
130.75  
130.57  
130.30  
130.24  
129.91  
128.96  
128.82  
128.79  
128.62  
128.49  
128.21  
128.09  
127.88

125.17  
125.13  
125.10

122.46

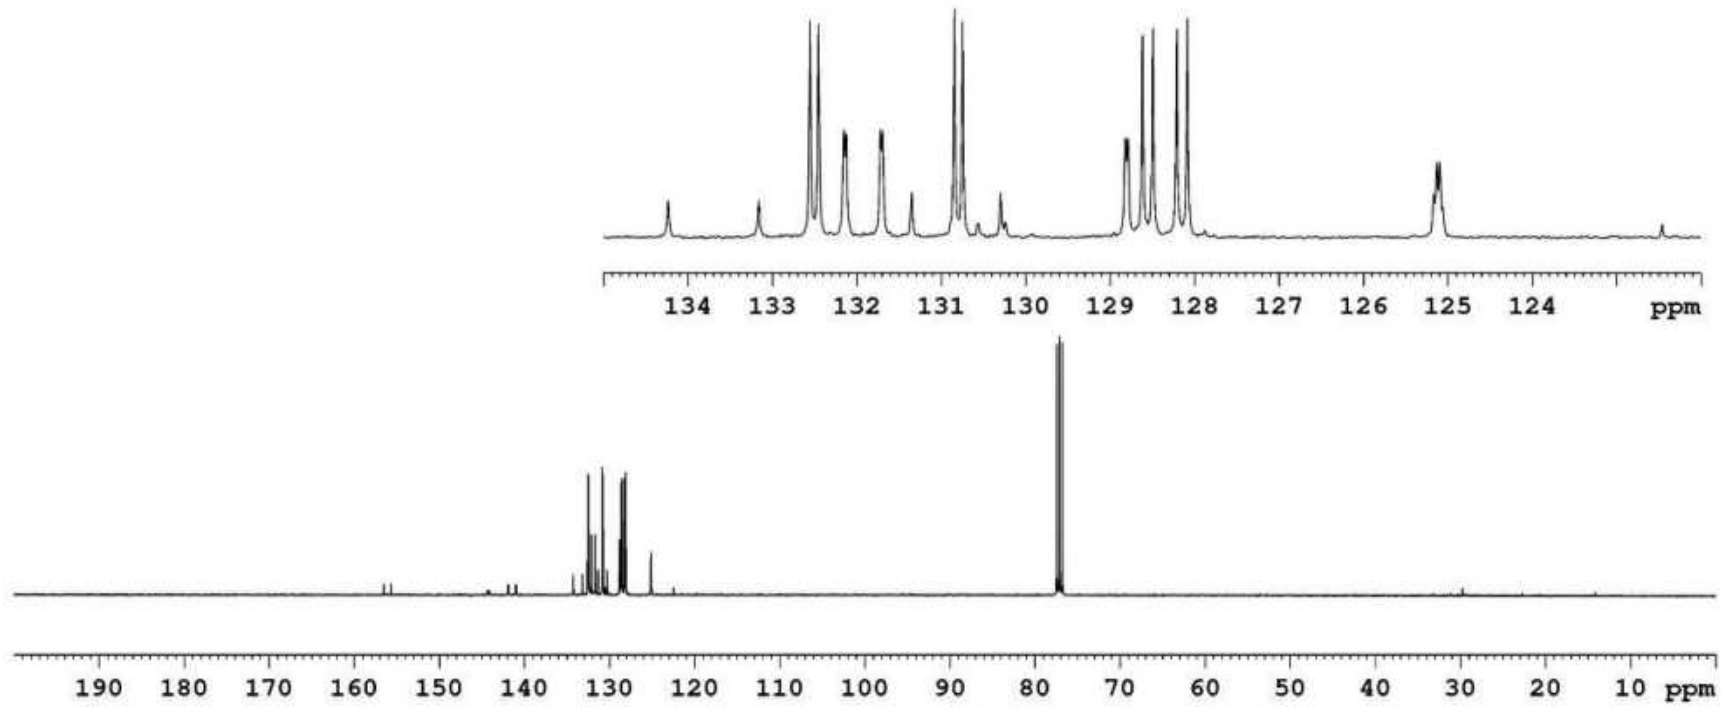

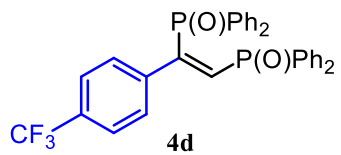

25.83  
25.74

17.87  
17.78

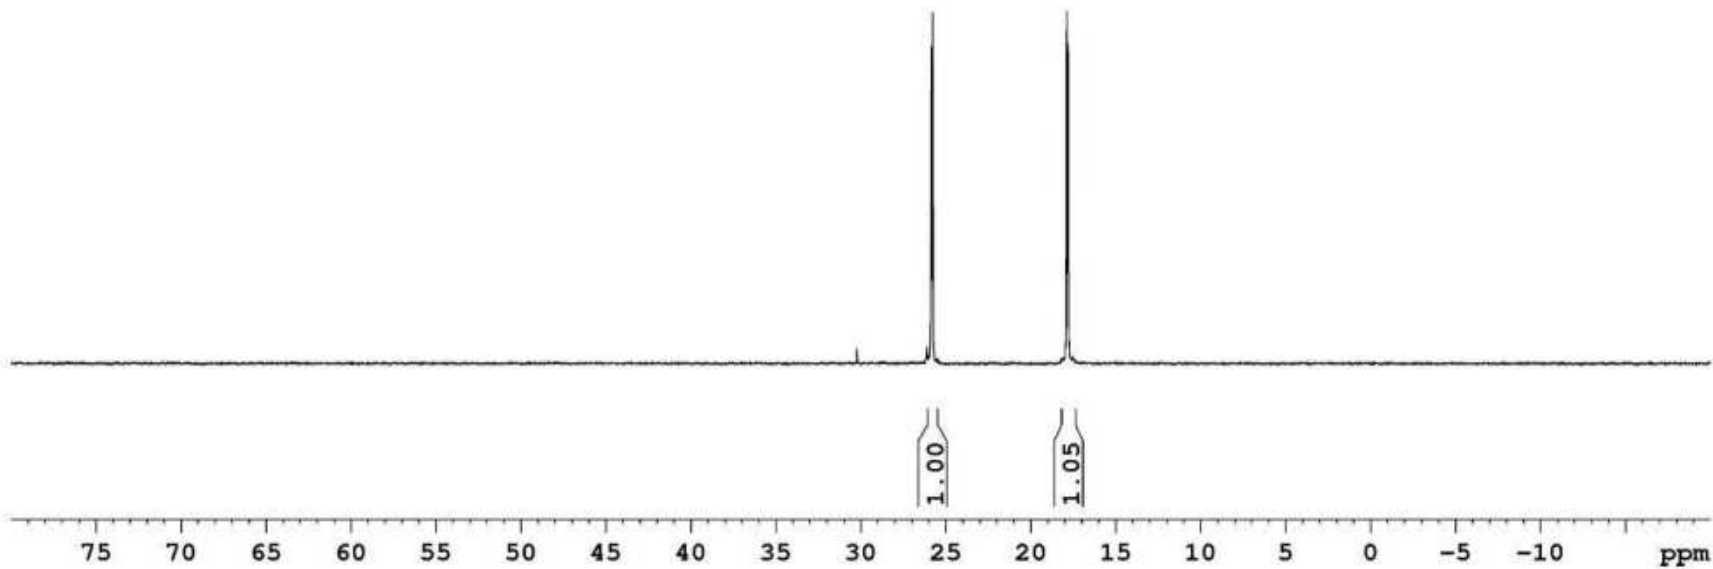

7.67  
7.65  
7.64  
7.63  
7.62  
7.61  
7.54  
7.52  
7.51  
7.49  
7.47  
7.46  
7.45  
7.45  
7.43  
7.43  
7.41  
7.41  
7.40  
7.39  
7.37  
7.37  
7.36  
7.35  
7.34  
7.33  
7.26  
7.25  
7.24  
7.23  
7.22  
7.21  
7.20  
7.17  
7.15  
7.15  
7.11  
7.06  
6.90  
6.88

— 1.22

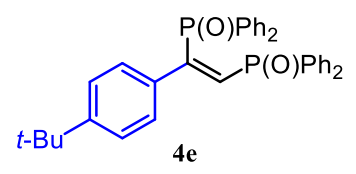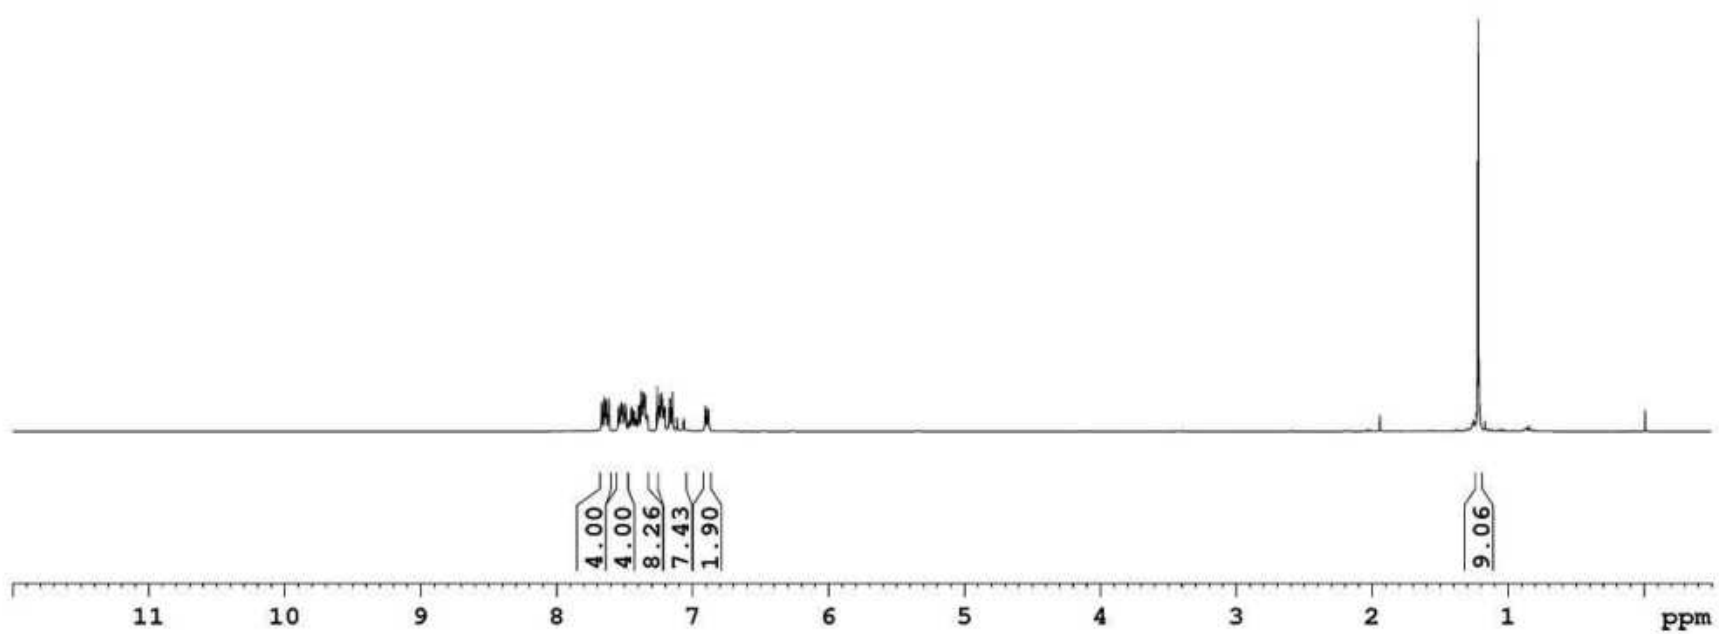



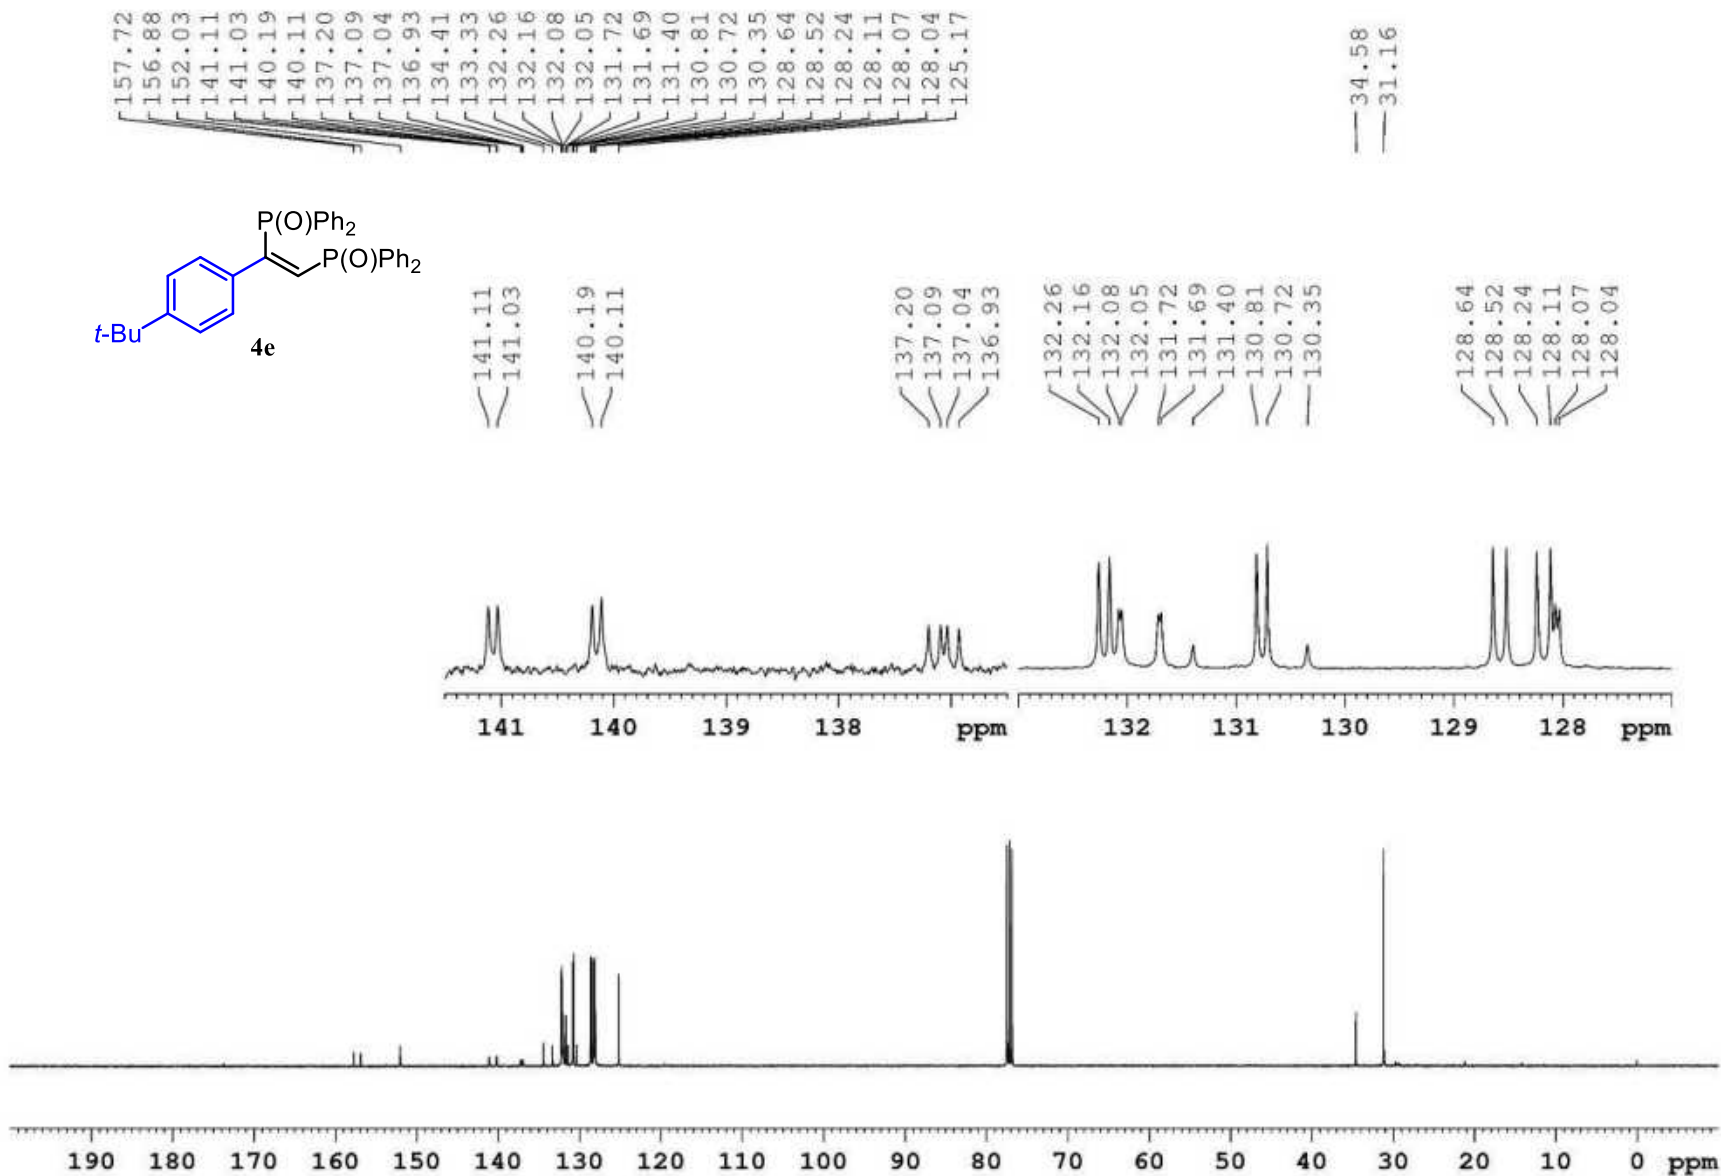

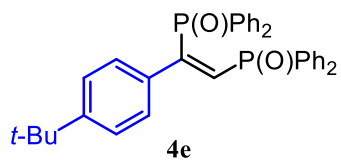

< 26.15  
< 26.07

< 19.05  
< 18.96

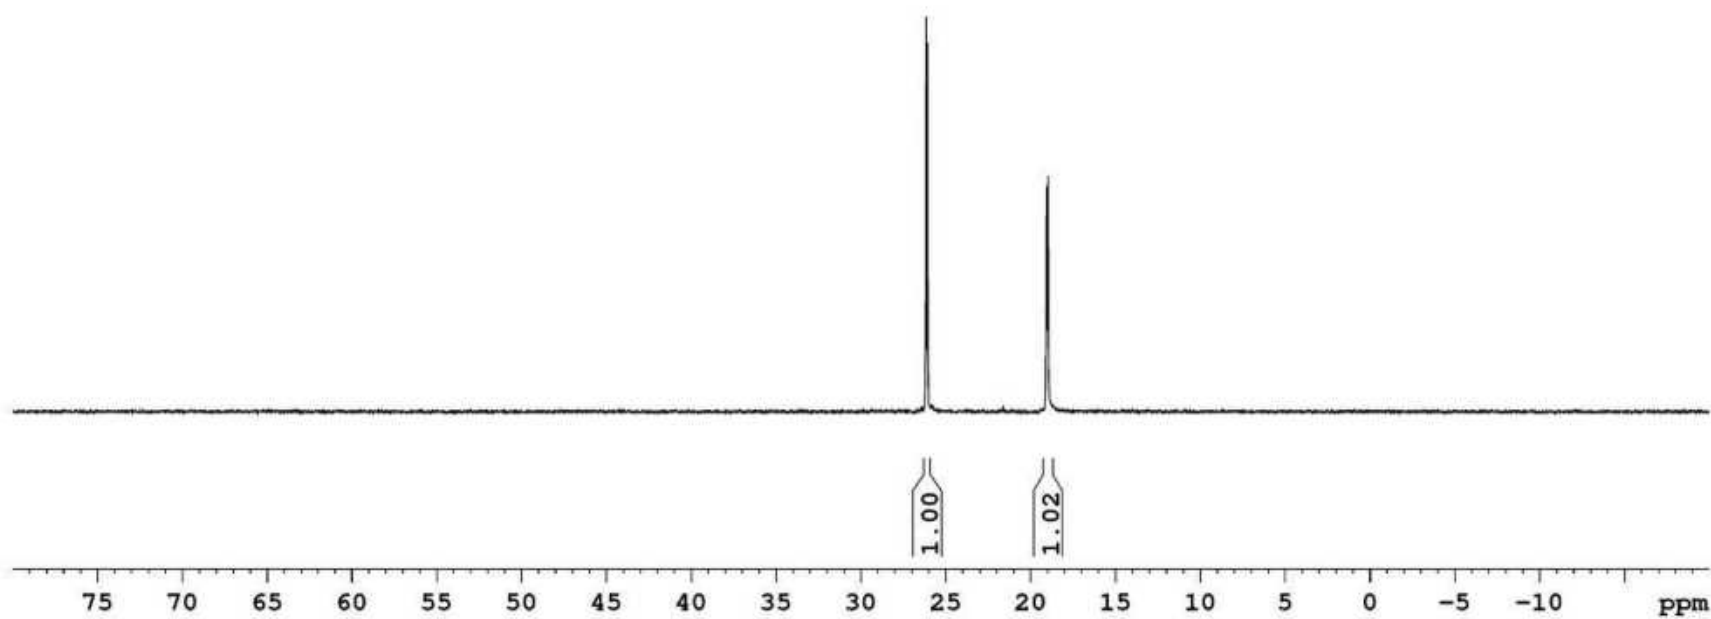

7.68  
7.67  
7.66  
7.65  
7.64  
7.63  
7.62  
7.62  
7.47  
7.46  
7.45  
7.44  
7.43  
7.43  
7.42  
7.40  
7.40  
7.40  
7.39  
7.38  
7.38  
7.38  
7.37  
7.37  
7.36  
7.36  
7.35  
7.30  
7.29  
7.28  
7.27  
7.26  
7.25  
7.19  
7.17  
7.15  
7.13  
7.13  
7.11  
7.10  
7.06  
6.94  
6.93  
6.91  
6.91  
6.89  
6.89  
6.88  
6.86  
6.80  
6.78

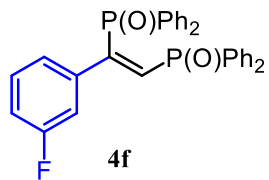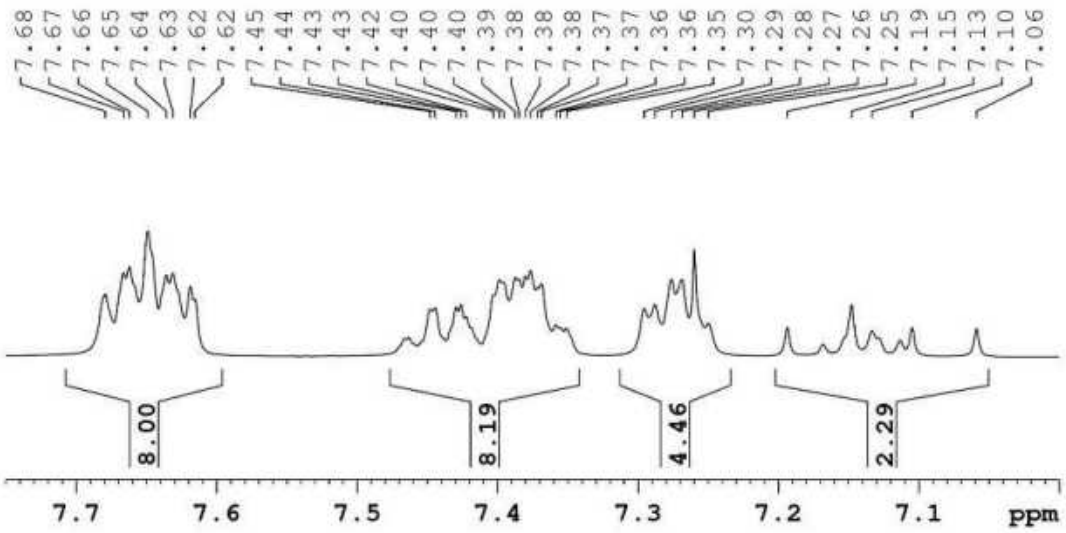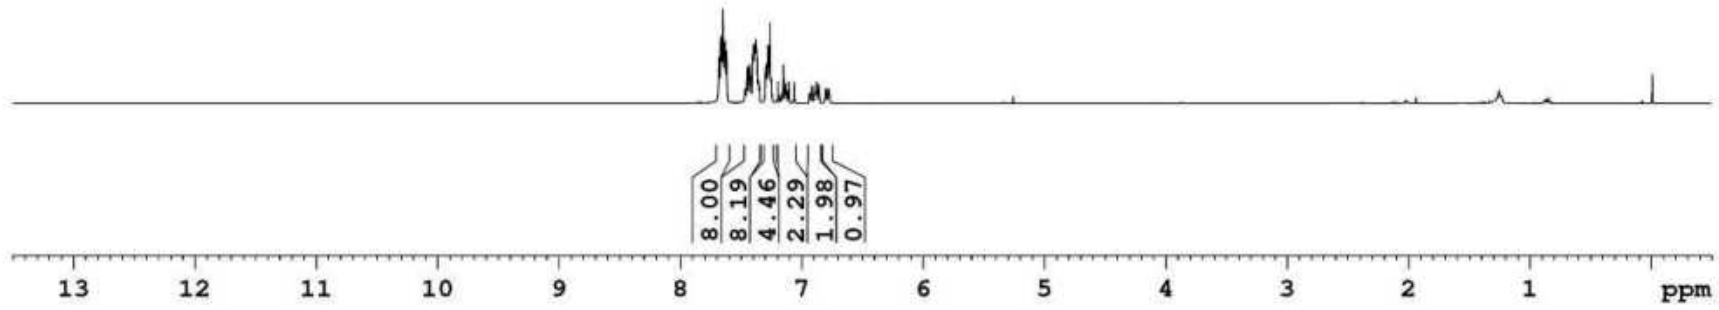

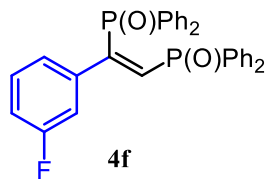

163.29  
 160.83  
 156.26  
 155.43  
 142.74  
 142.64  
 142.57  
 142.47  
 142.40  
 141.99  
 141.91  
 141.08  
 141.00  
 134.55  
 133.48  
 132.46  
 132.36  
 132.00  
 131.97  
 131.67  
 131.58  
 131.55  
 130.92  
 130.82  
 129.82  
 129.73  
 128.52  
 128.40  
 128.16  
 128.03  
 124.25  
 124.21  
 124.18  
 115.69  
 115.66  
 115.46  
 115.24

142.74  
 142.64  
 142.57  
 142.47  
 142.40  
 141.99  
 141.91  
 141.08  
 141.00  
 134.55  
 133.48  
 132.46  
 132.36  
 132.00  
 131.97  
 131.67  
 131.58  
 131.55  
 130.92  
 130.82  
 129.82  
 129.73  
 128.52  
 128.40  
 128.16  
 128.03

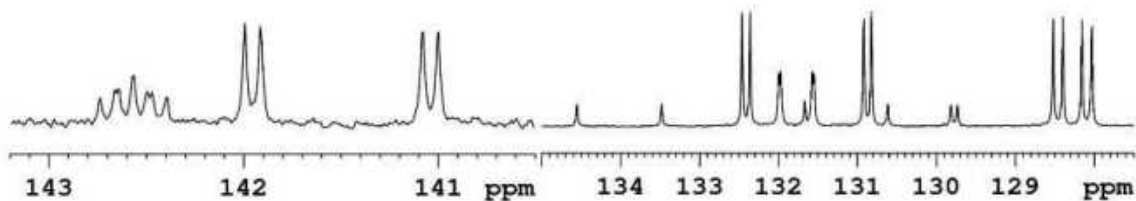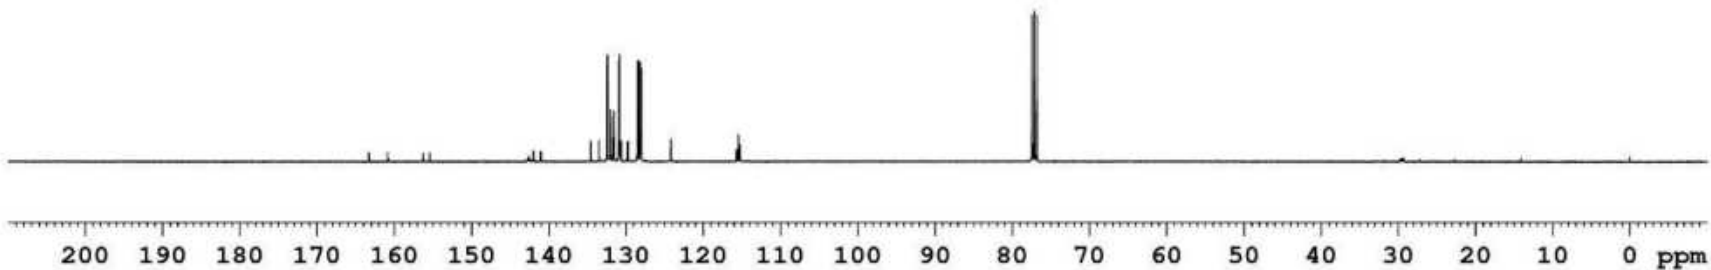

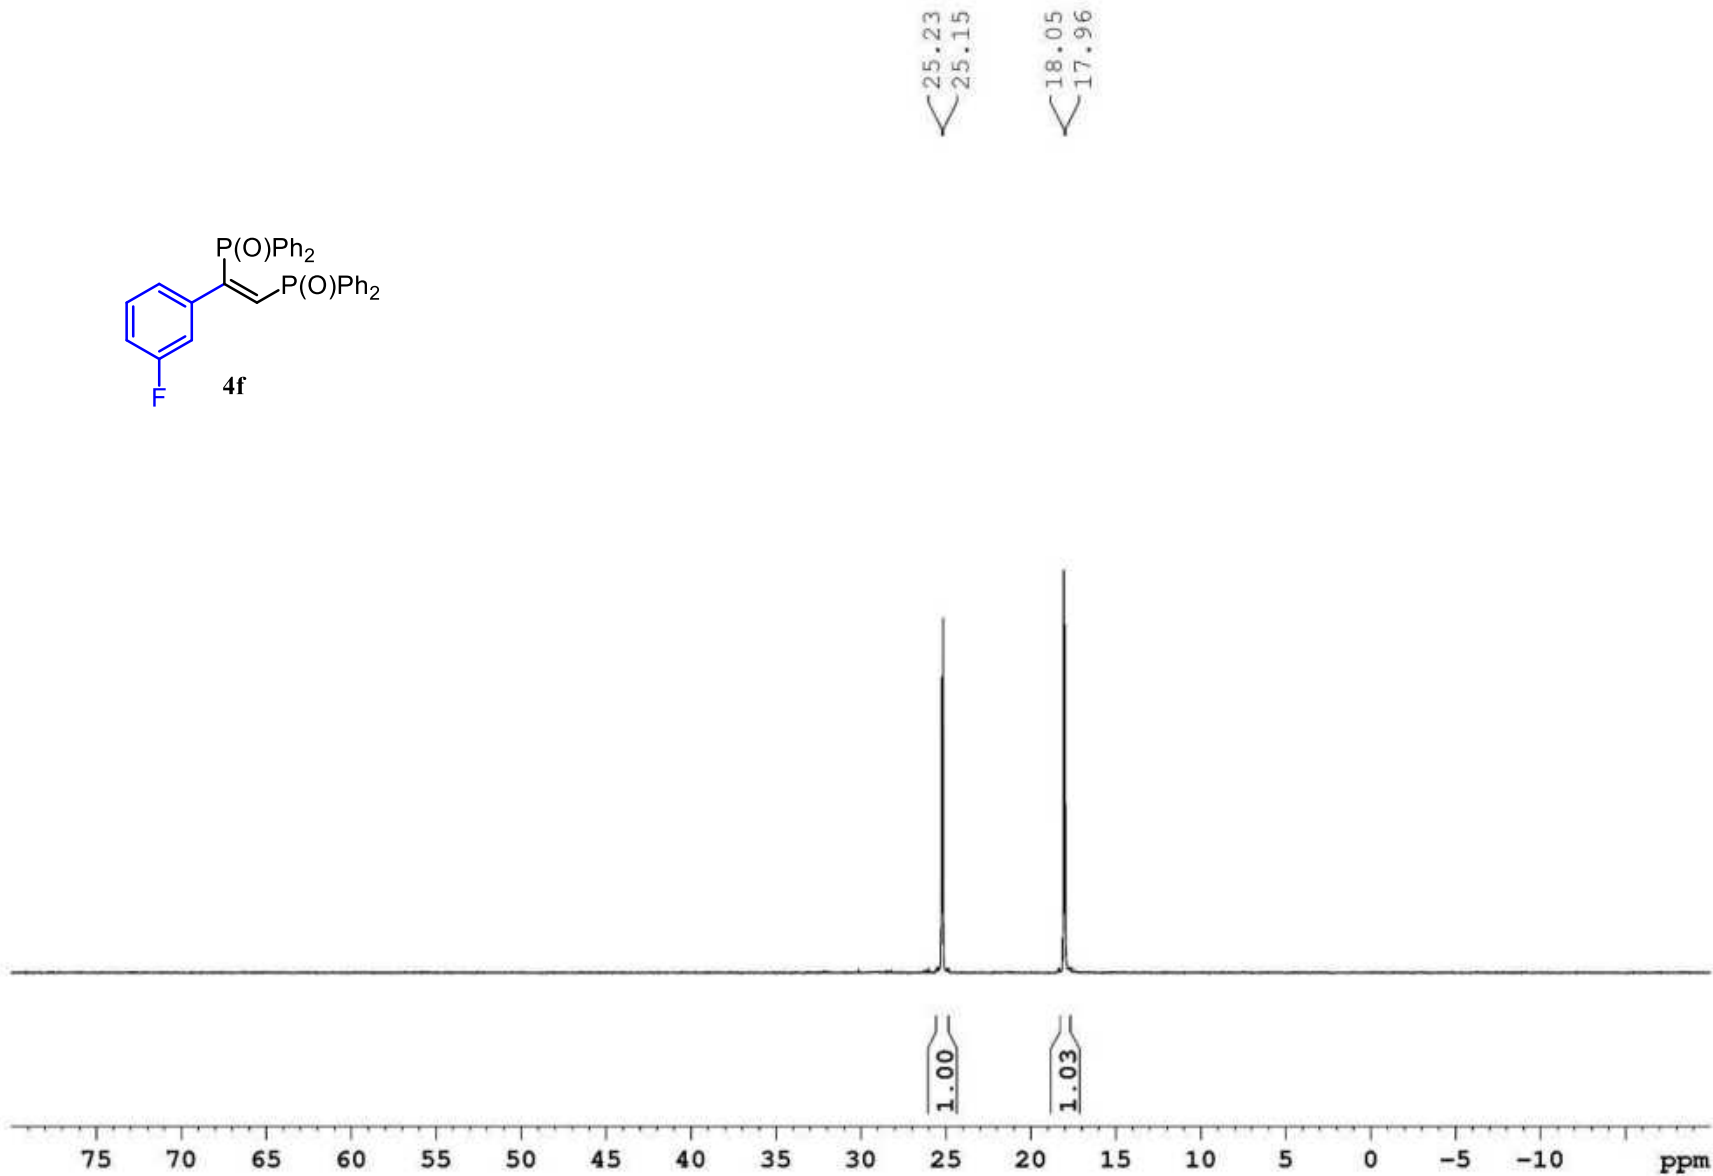

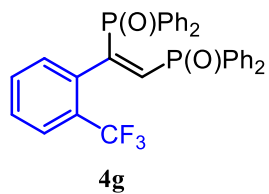

7.71  
 7.69  
 7.67  
 7.66  
 7.64  
 7.50  
 7.48  
 7.48  
 7.46  
 7.46  
 7.45  
 7.45  
 7.43  
 7.42  
 7.41  
 7.40  
 7.39  
 7.39  
 7.38  
 7.36  
 7.34  
 7.32  
 7.31  
 7.30  
 7.29  
 7.28  
 7.28  
 7.27  
 7.24  
 7.23  
 7.18  
 7.14  
 7.09

7.71  
 7.69  
 7.67  
 7.67  
 7.66  
 7.64  
 7.50  
 7.48  
 7.48  
 7.46  
 7.46  
 7.45  
 7.45  
 7.43  
 7.42  
 7.41  
 7.40  
 7.39  
 7.39  
 7.38  
 7.36  
 7.34  
 7.32  
 7.31  
 7.30  
 7.29  
 7.28  
 7.28  
 7.27  
 7.24  
 7.23  
 7.18  
 7.14  
 7.09

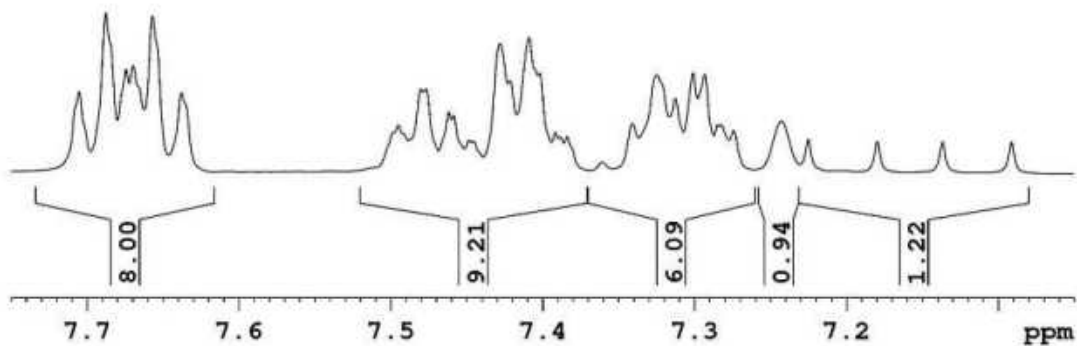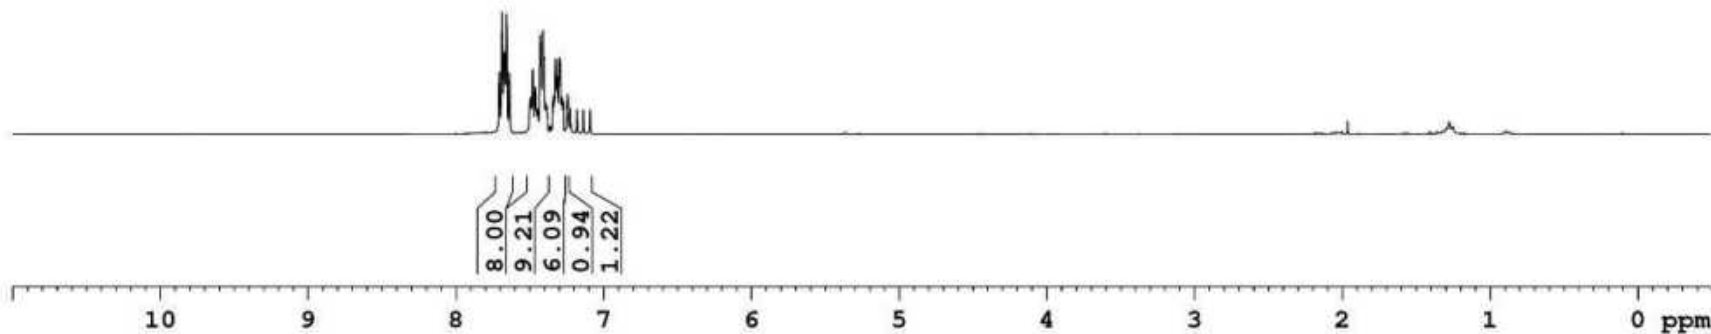

156.20  
 155.37  
 142.46  
 142.38  
 141.55  
 141.47  
 141.37  
 141.26  
 141.20  
 141.10  
 134.26  
 133.19  
 132.39  
 132.29  
 132.09  
 132.07  
 131.75  
 131.69  
 131.66  
 131.45  
 130.96  
 130.86  
 130.59  
 130.40  
 130.26  
 129.94  
 128.75  
 128.58  
 128.45  
 128.24  
 128.11  
 127.67  
 125.15  
 125.12  
 125.08  
 125.05  
 124.96  
 122.25  
 119.54

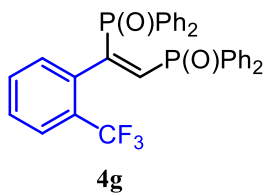

132.39  
 132.29  
 132.09  
 132.07  
 131.75  
 131.69  
 131.66  
 131.45

130.96  
 130.86  
 130.59  
 130.40  
 130.26

129.94

128.75  
 128.58  
 128.45  
 128.24  
 128.11

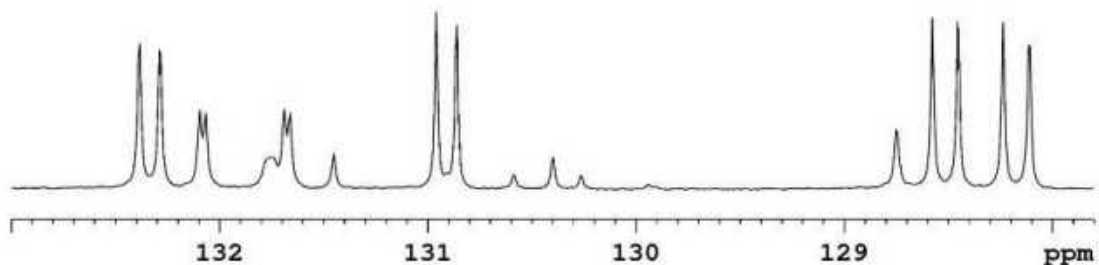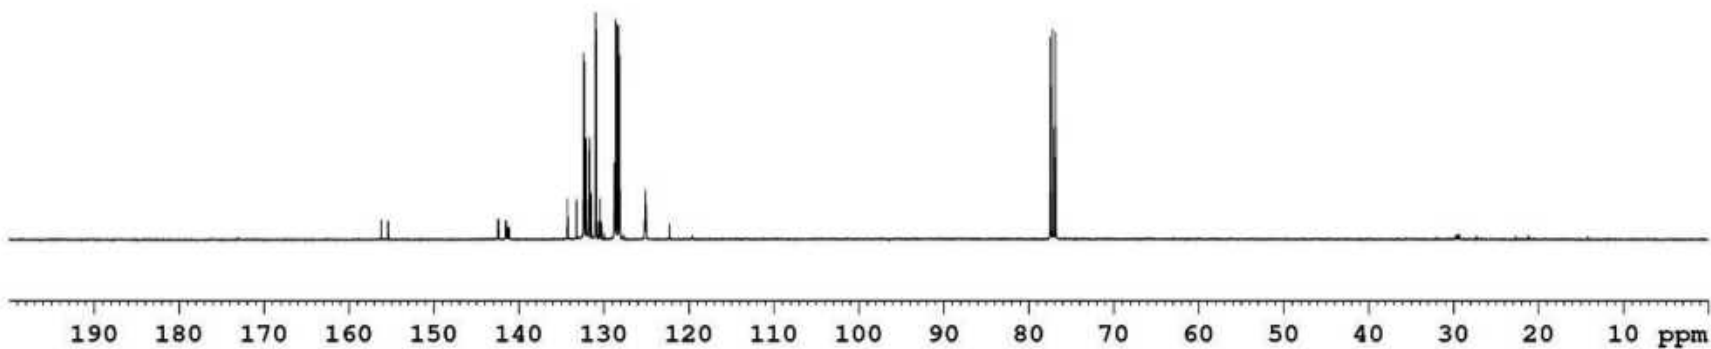

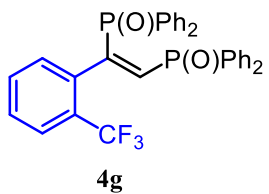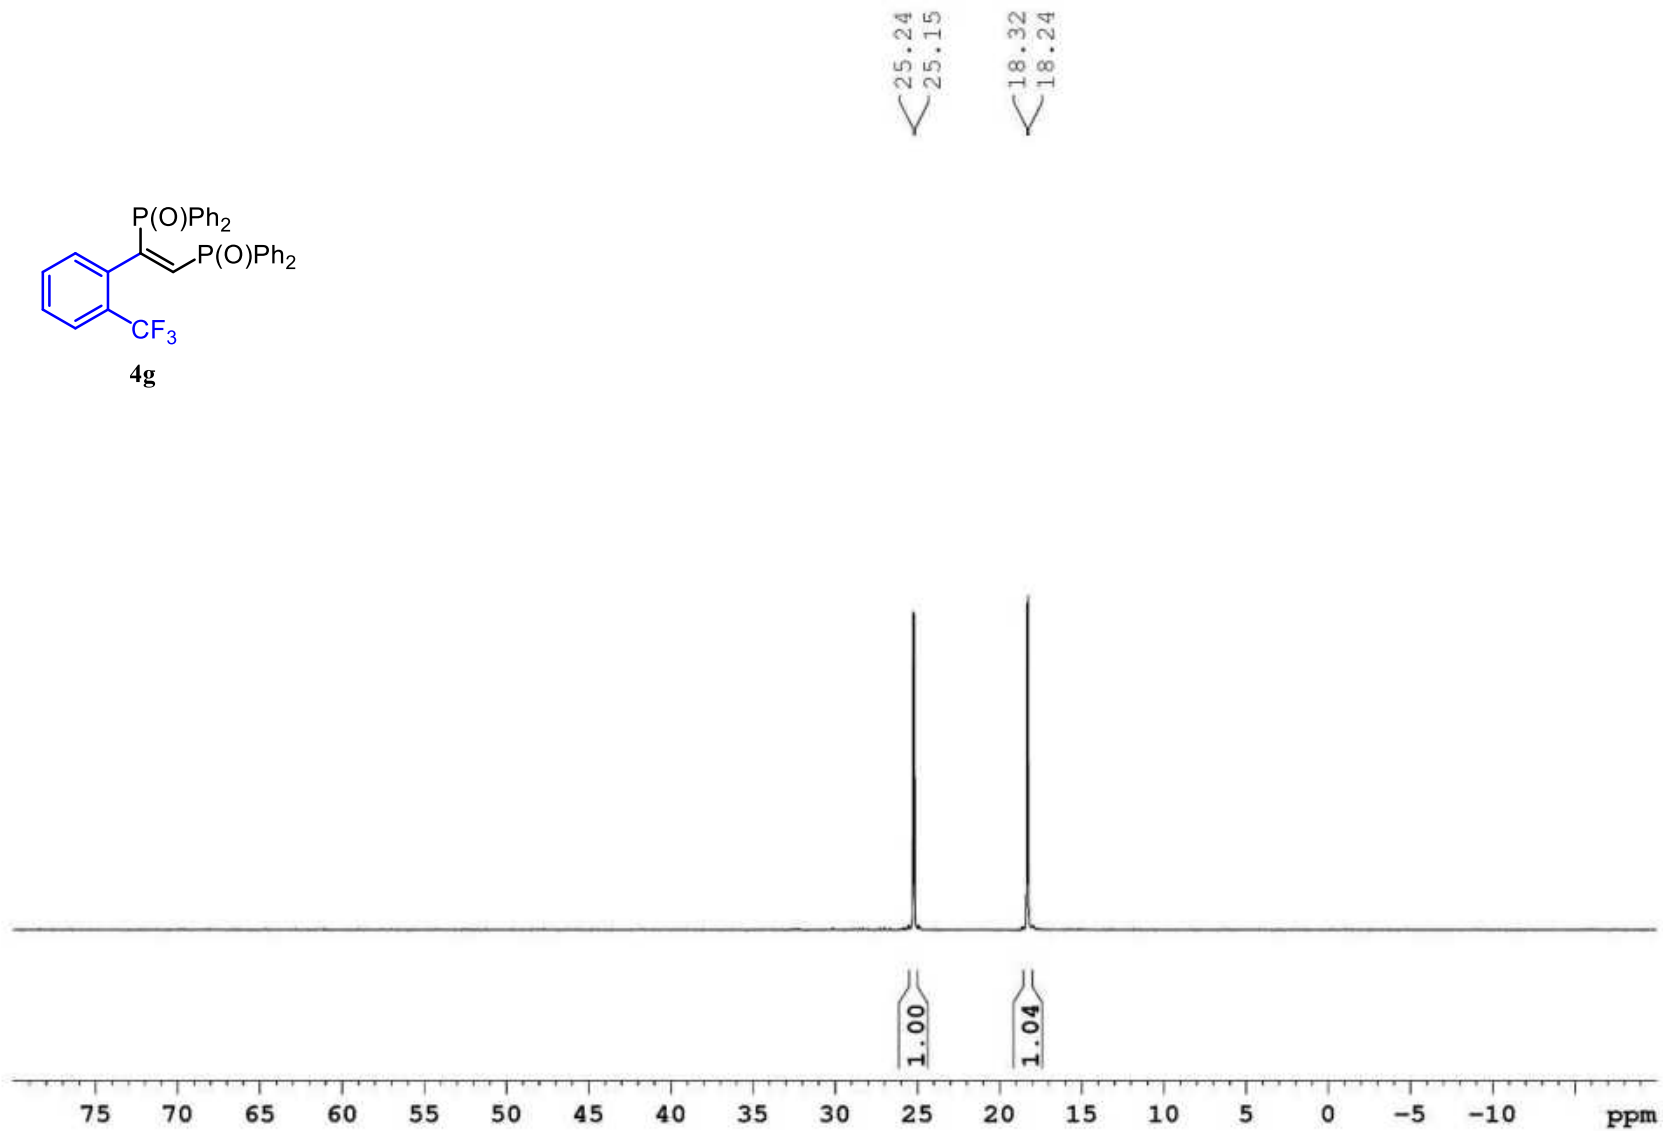



7.77  
7.75  
7.74  
7.72  
7.65  
7.63  
7.61  
7.60  
7.58  
7.50  
7.49  
7.47  
7.46  
7.45  
7.42  
7.40  
7.39  
7.39  
7.34  
7.34  
7.29  
7.28  
7.27  
7.26  
7.25  
7.20  
7.12  
7.10

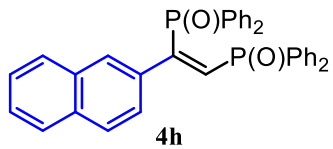

7.77  
7.75  
7.74  
7.72

7.65  
7.63  
7.61  
7.60  
7.58

7.50  
7.49  
7.47  
7.46  
7.45  
7.42  
7.40  
7.39  
7.39

7.34

7.29  
7.28  
7.27  
7.26  
7.25

7.20

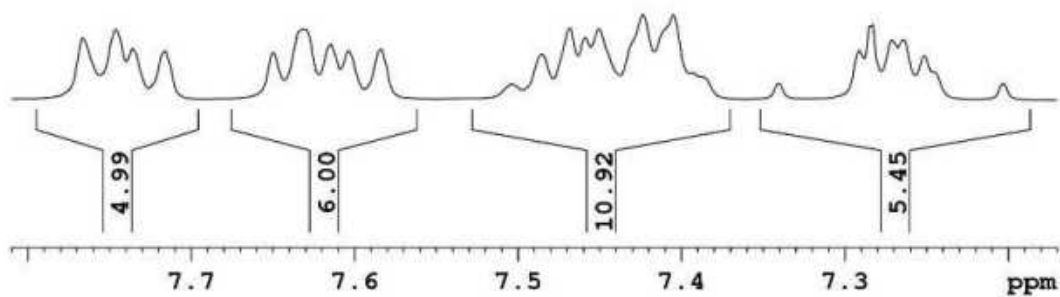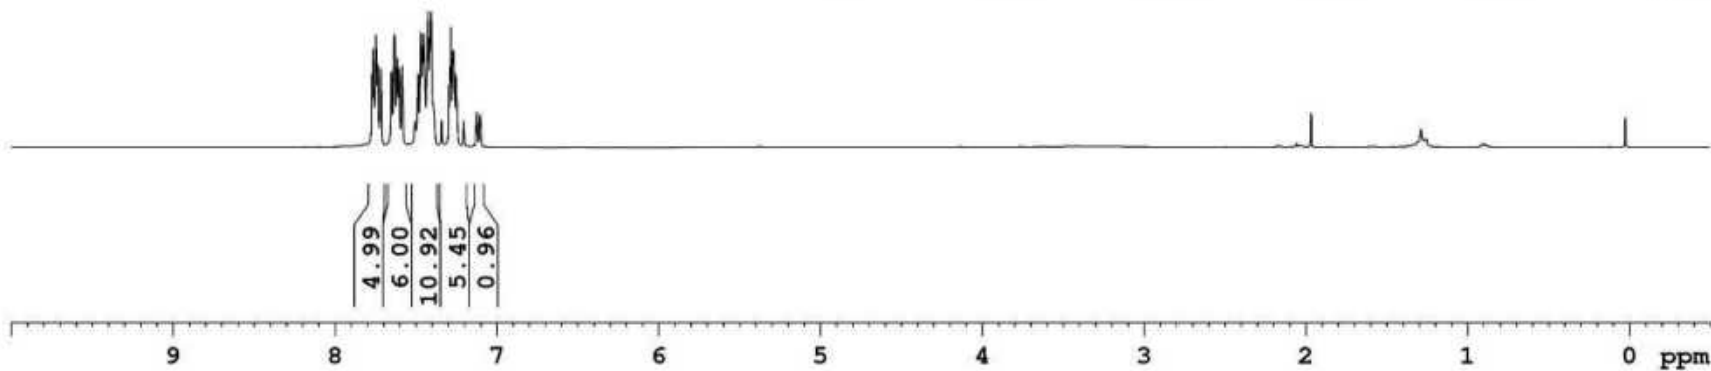

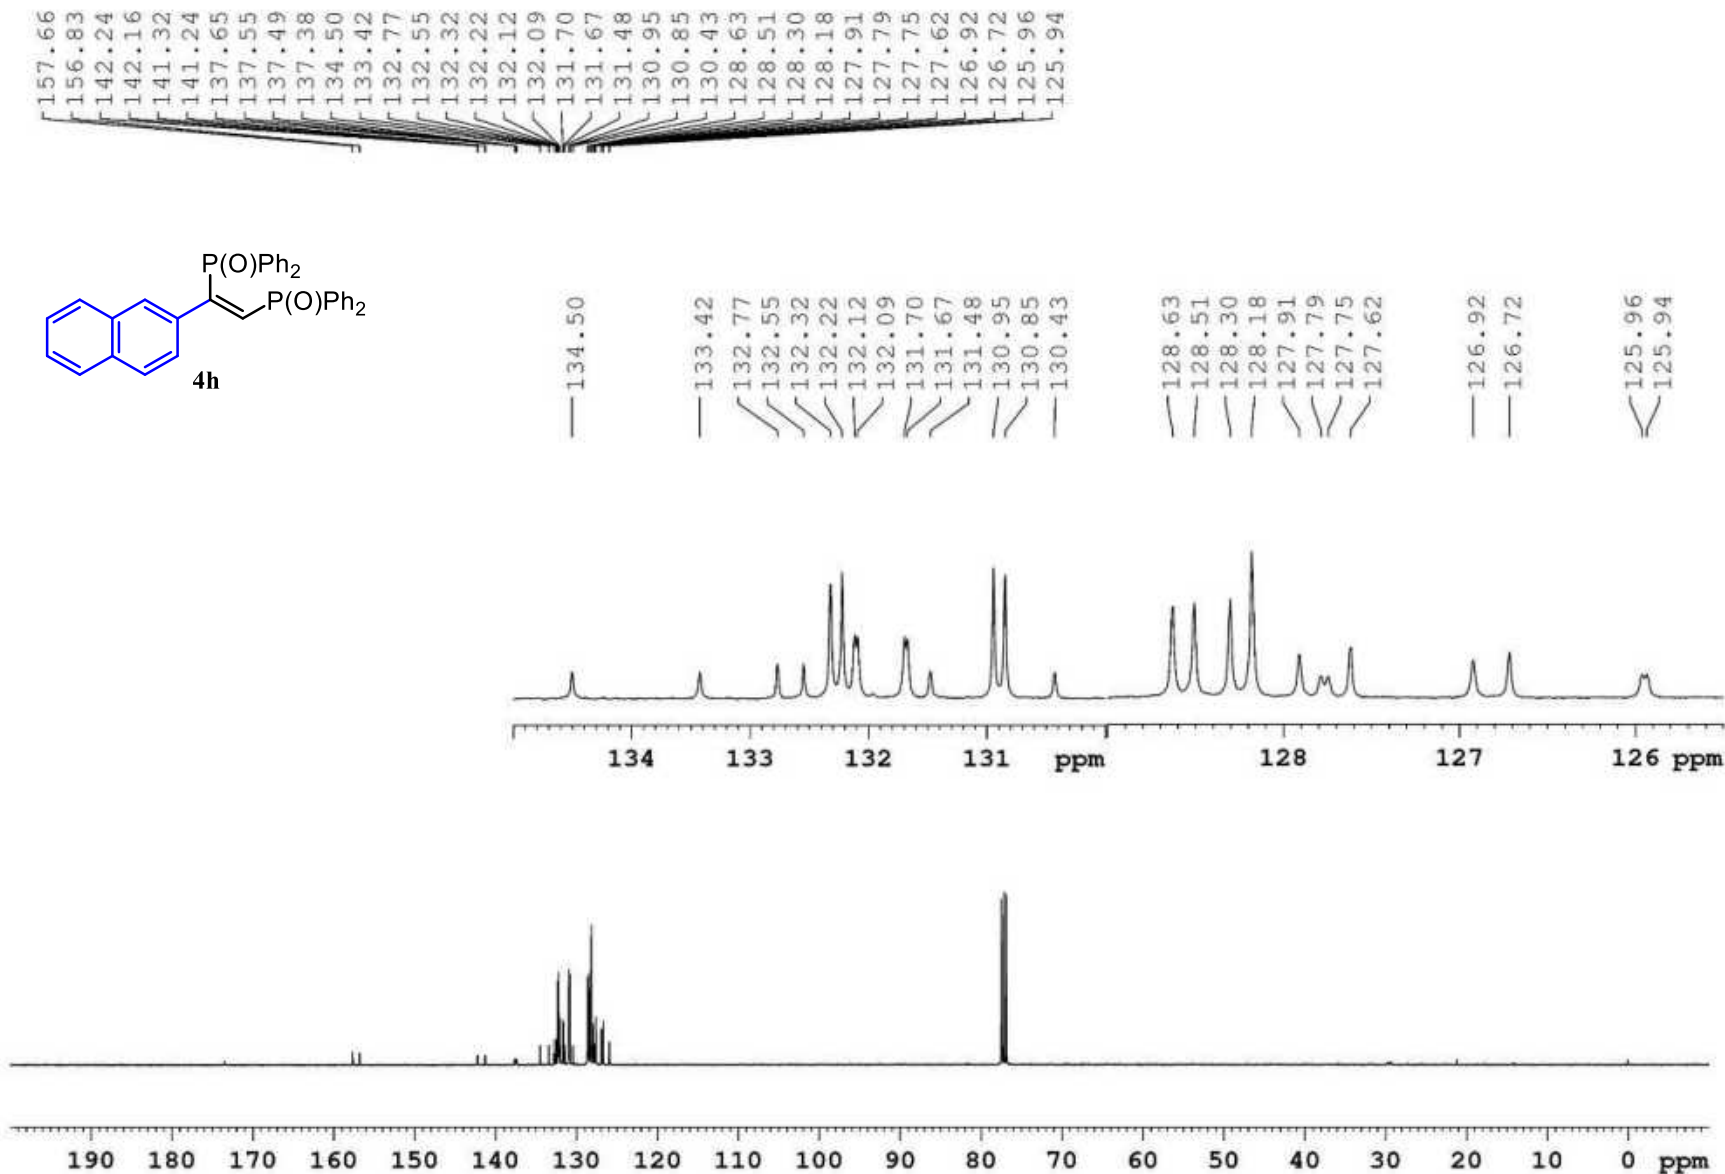

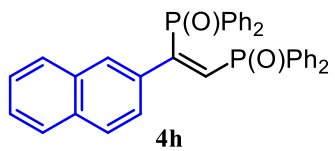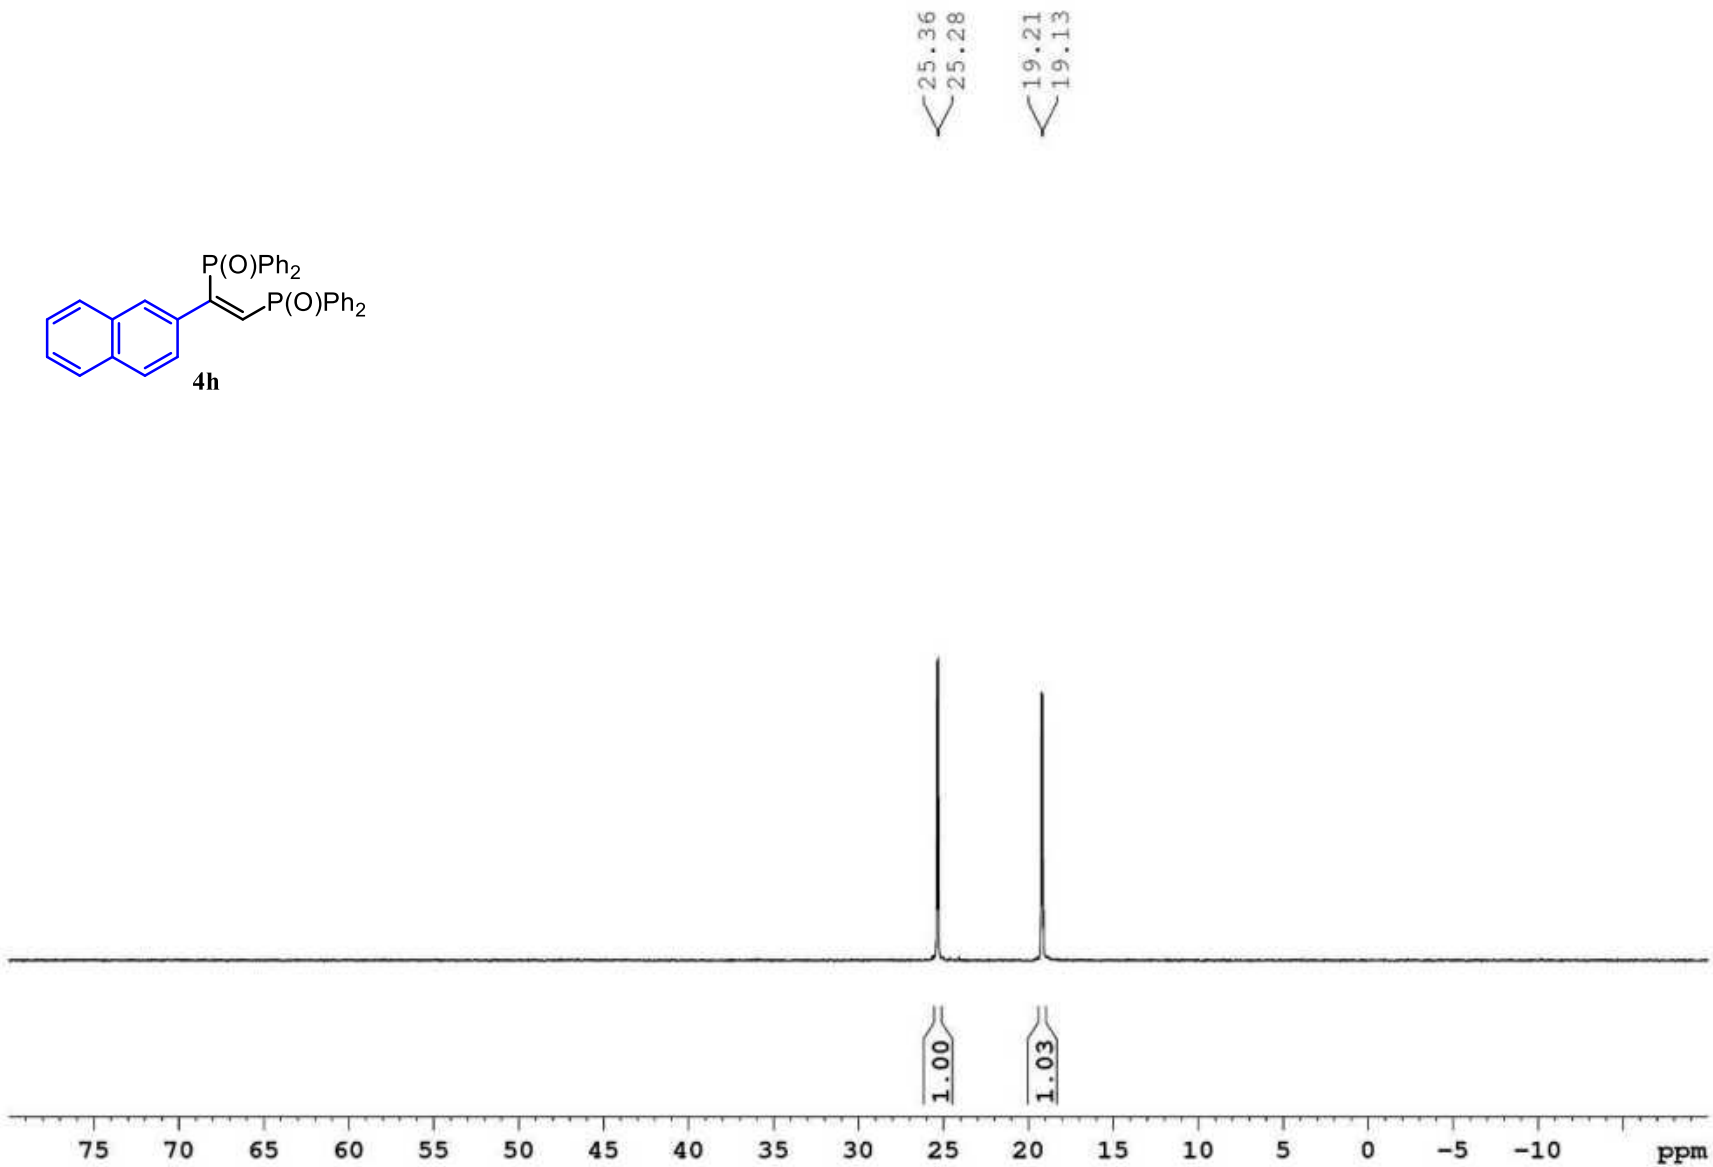

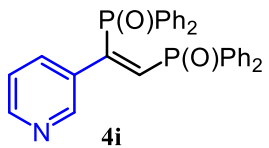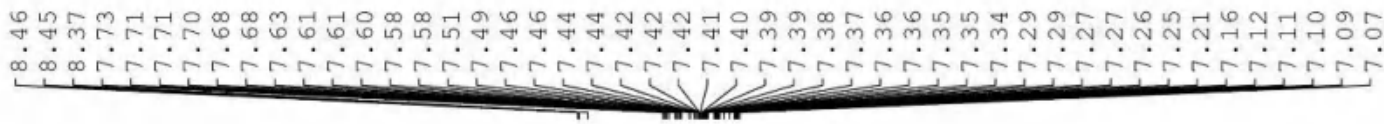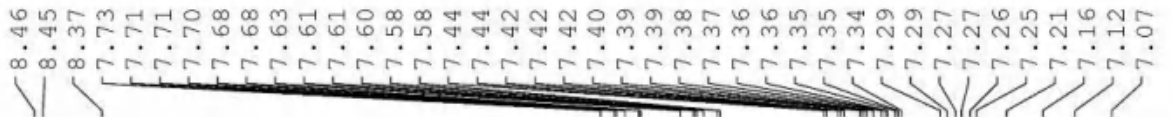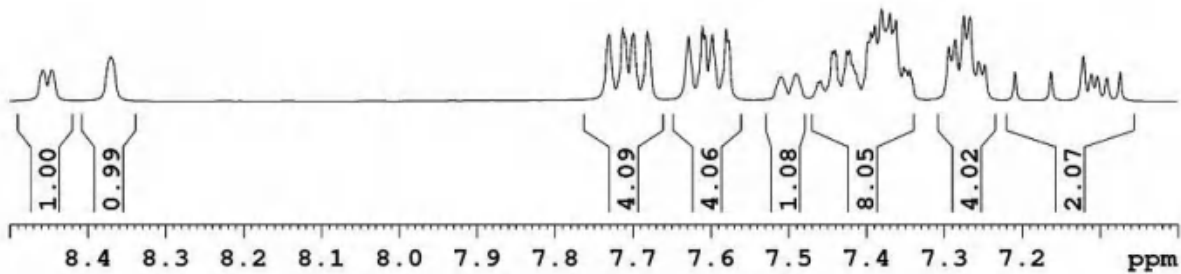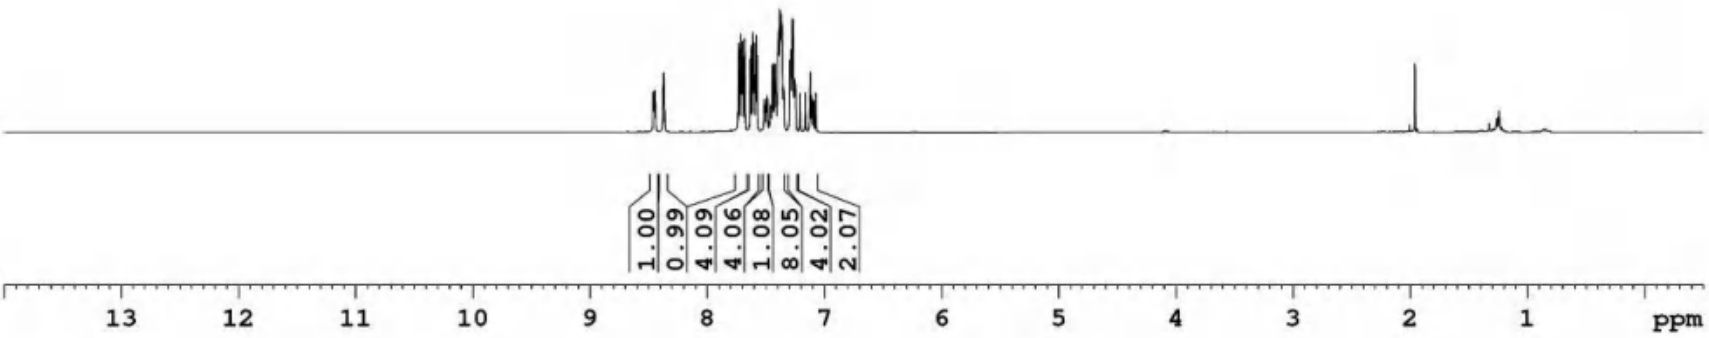

154.03  
153.20  
149.39  
148.37  
148.34  
142.27  
142.19  
141.36  
141.28  
136.93  
136.84  
136.77  
136.67  
136.13  
136.11  
134.10  
133.03  
132.52  
132.42  
132.15  
132.13  
131.73  
131.70  
131.30  
130.83  
130.73  
130.24  
128.61  
128.49  
128.23  
128.10  
122.62

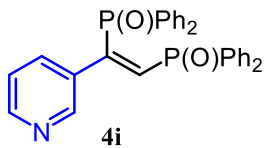

136.93  
136.84  
136.77  
136.67  
136.13  
136.11

134.10

133.03

132.52  
132.42

132.15  
132.13

131.73  
131.70

131.30

130.83  
130.73

130.24

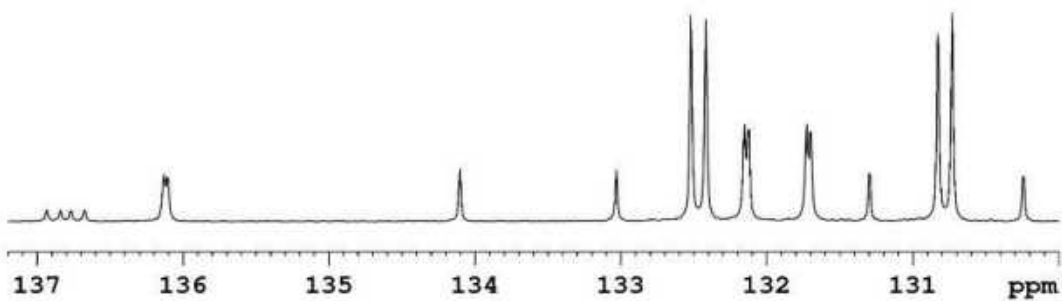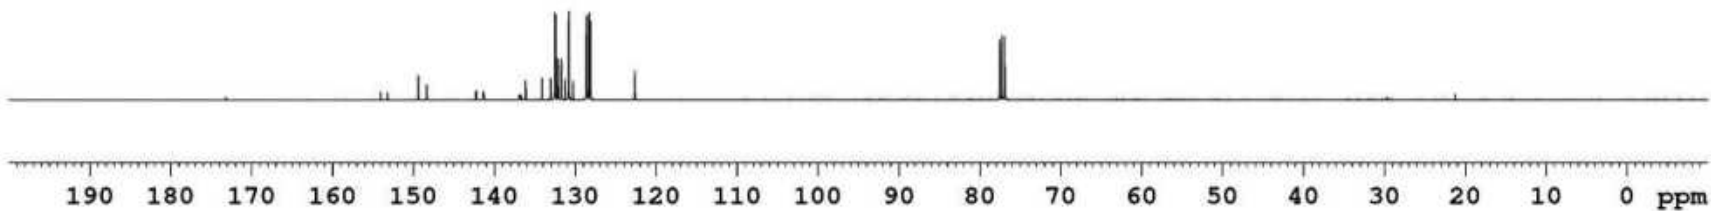

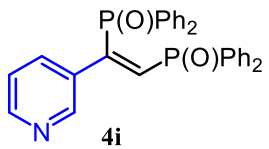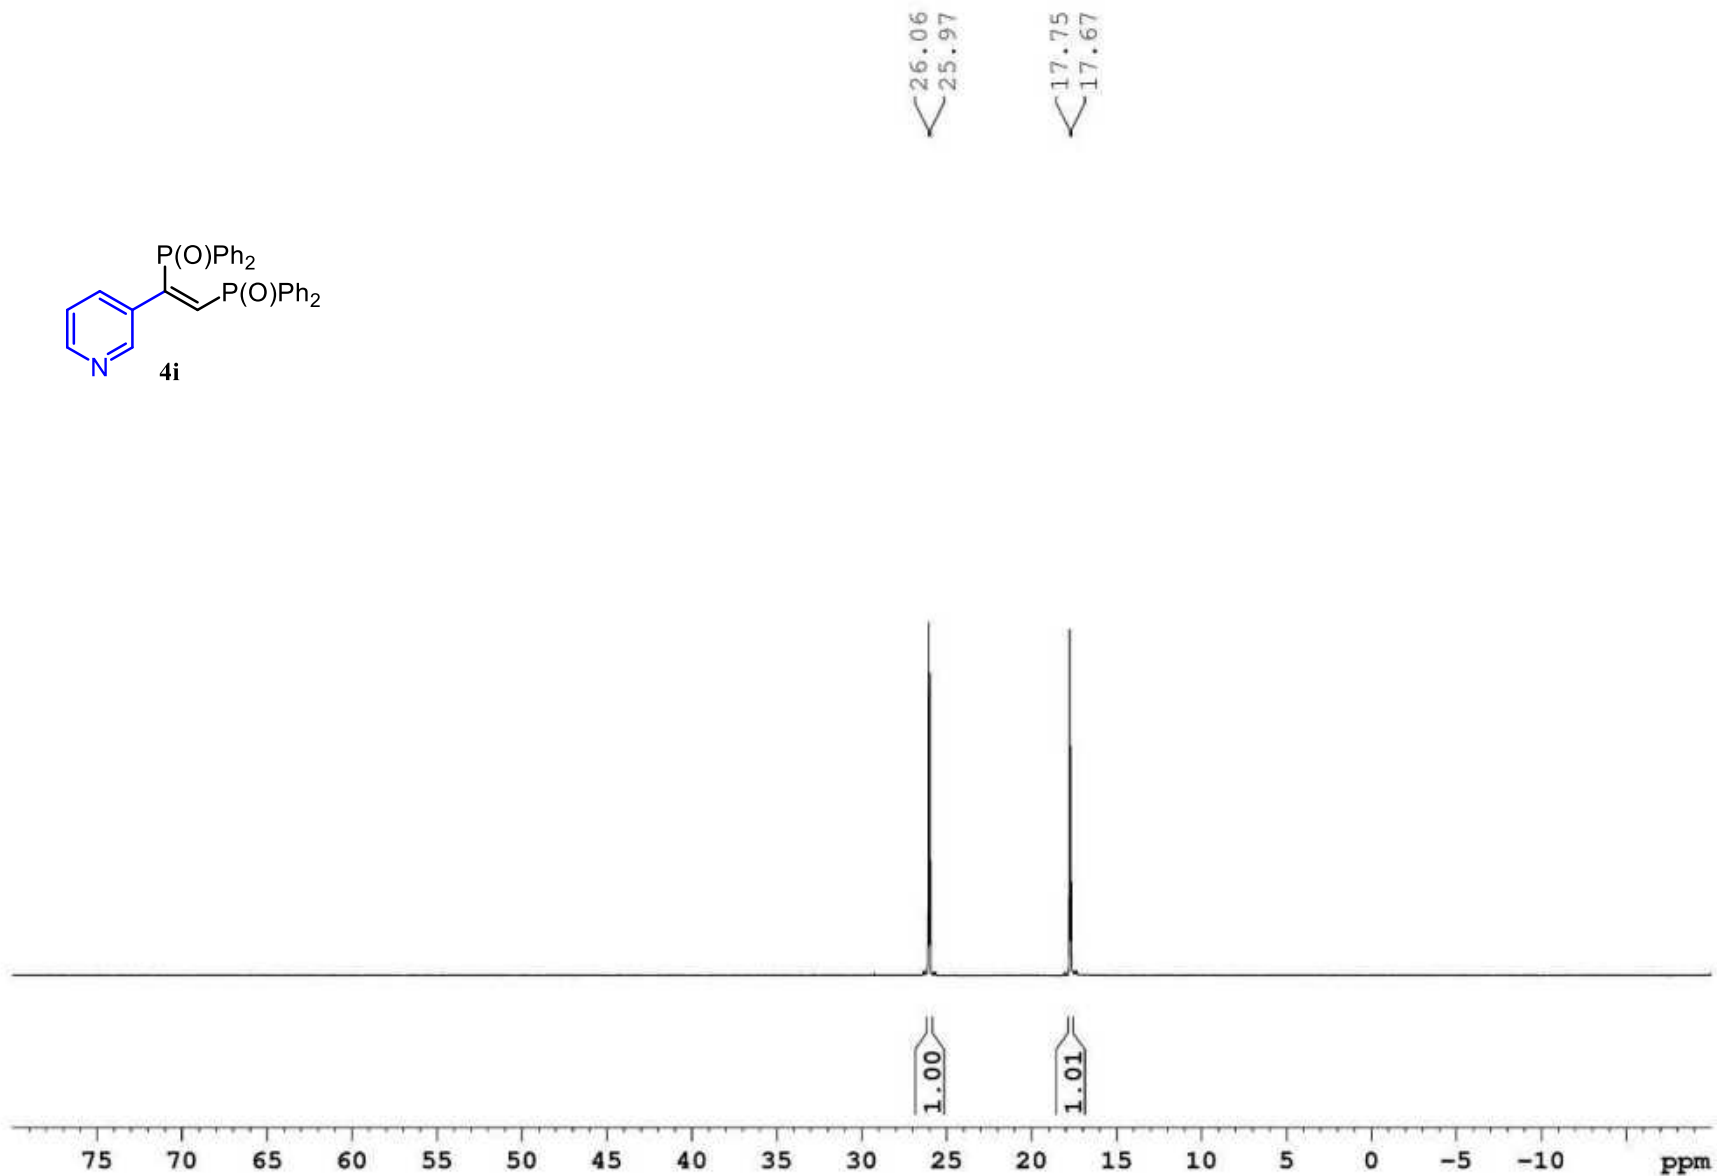

7.73  
7.71  
7.69  
7.68  
7.57  
7.55  
7.54  
7.52  
7.44  
7.42  
7.41  
7.39  
7.37  
7.36  
7.35  
7.34  
7.33  
7.32  
7.31  
7.31  
7.29  
7.29  
7.28  
7.27  
7.08  
7.04  
6.98  
6.94

2.88  
2.85  
2.82  
2.79  
1.75  
1.73  
1.71  
1.69  
1.66  
1.63  
1.21  
1.19  
1.17  
1.14  
1.13  
1.11

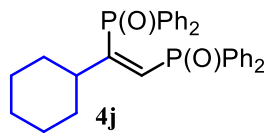

7.73  
7.71  
7.69  
7.68

7.57  
7.55  
7.54  
7.52  
7.44  
7.42  
7.41  
7.39  
7.37  
7.36  
7.35  
7.34  
7.33  
7.32  
7.31  
7.31  
7.29  
7.29

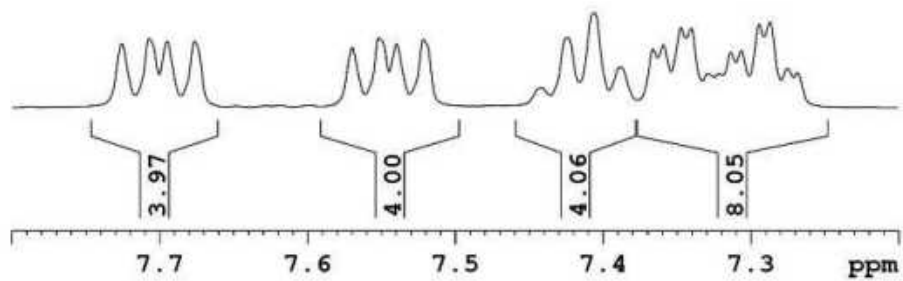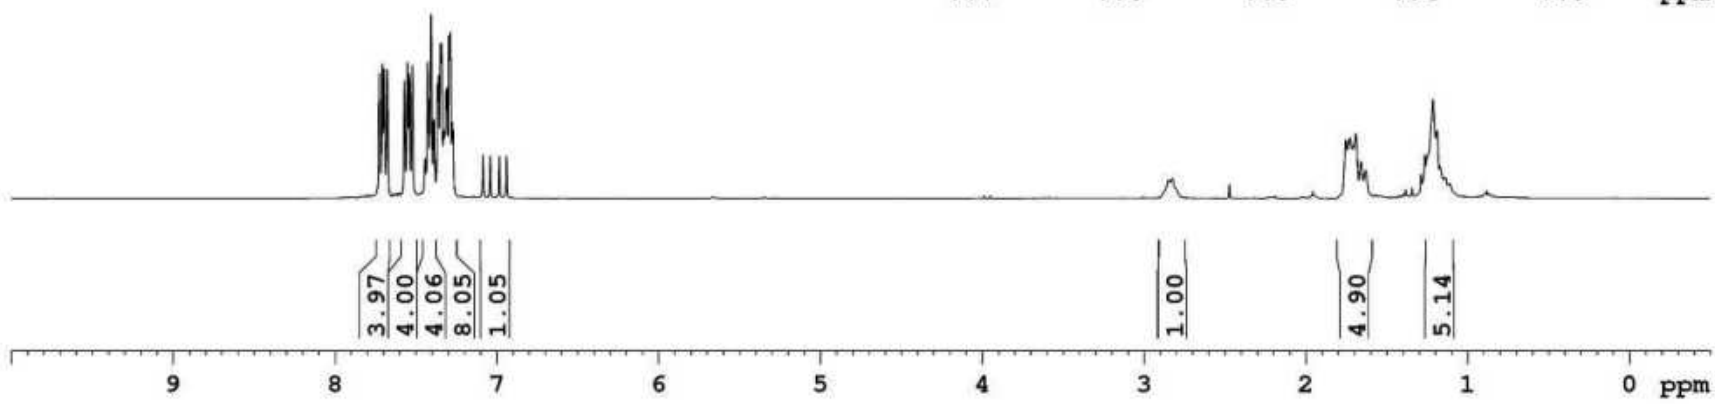

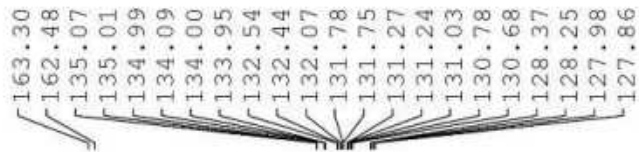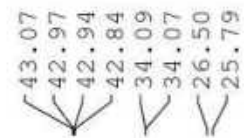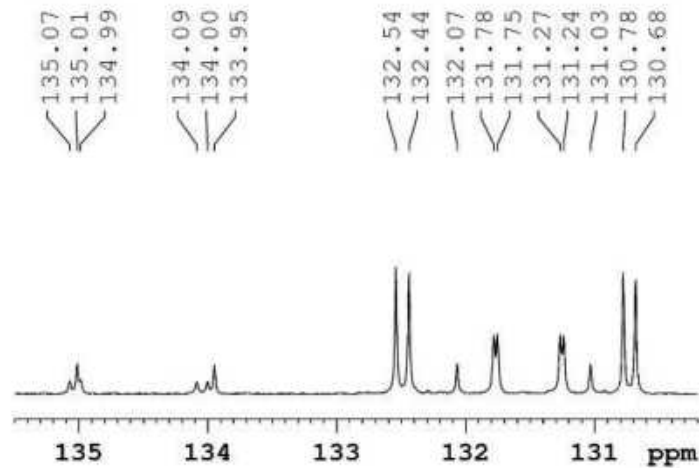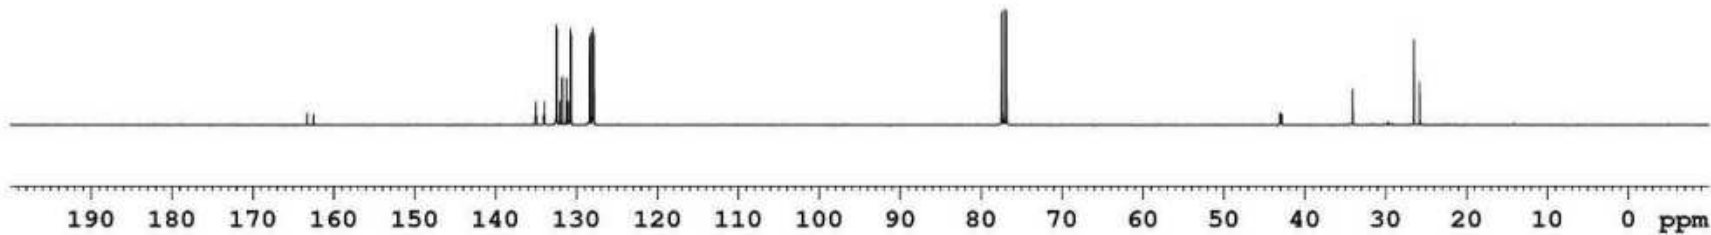



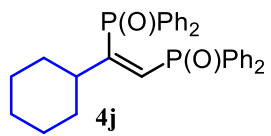

28.96  
28.83

19.05  
18.93

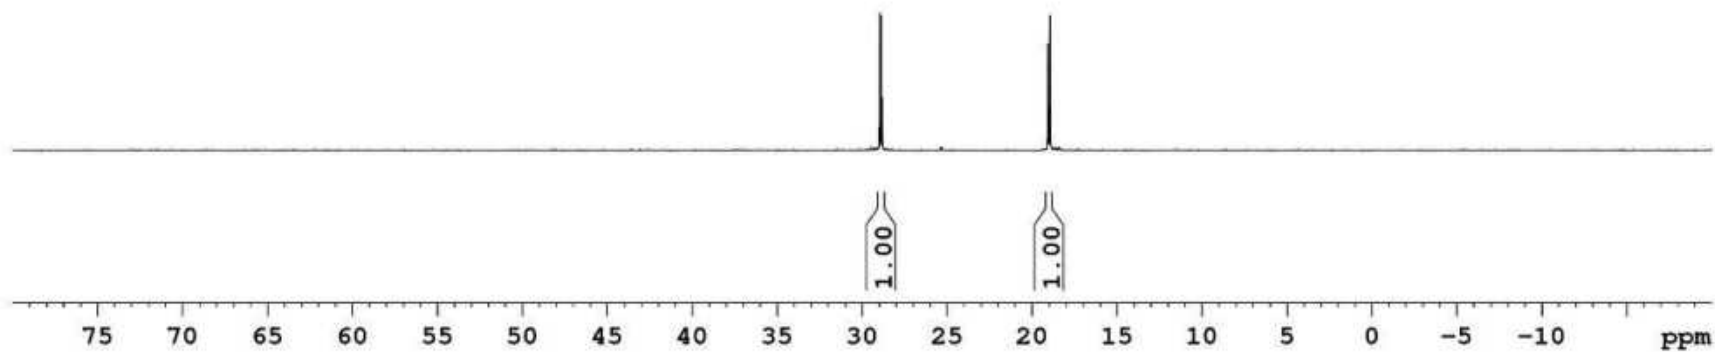

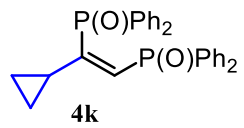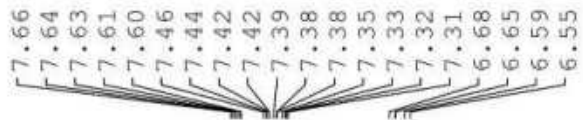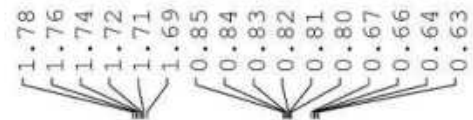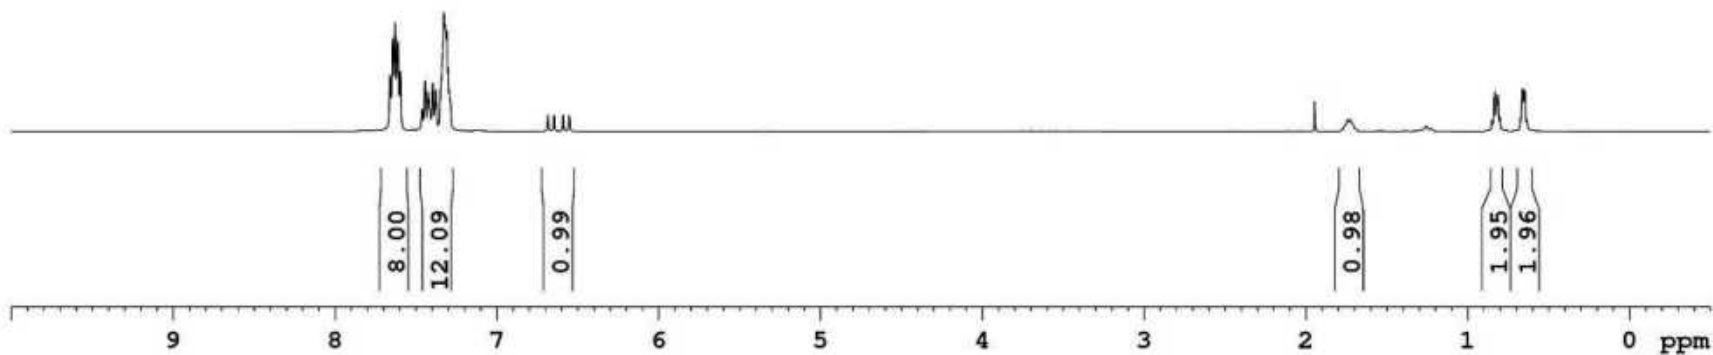

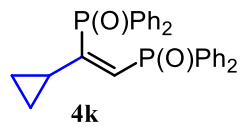

159.35  
 158.49  
 134.82  
 133.75  
 132.16  
 132.06  
 131.93  
 131.91  
 131.29  
 131.27  
 131.05  
 130.95  
 130.83  
 128.27  
 128.14

18.52  
 18.35  
 18.18  
 11.21  
 11.18

132.16  
 132.06  
 131.93  
 131.91

131.29  
 131.27  
 131.05  
 130.95  
 130.83

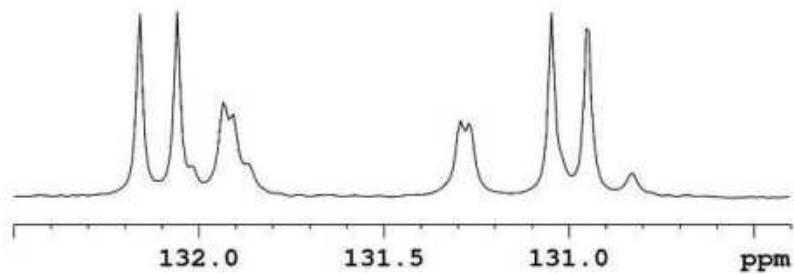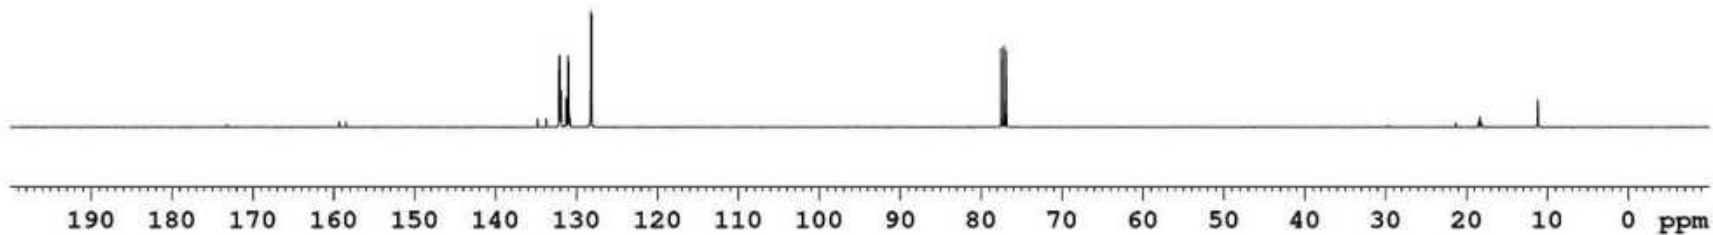



28.53  
28.43

20.70  
20.60

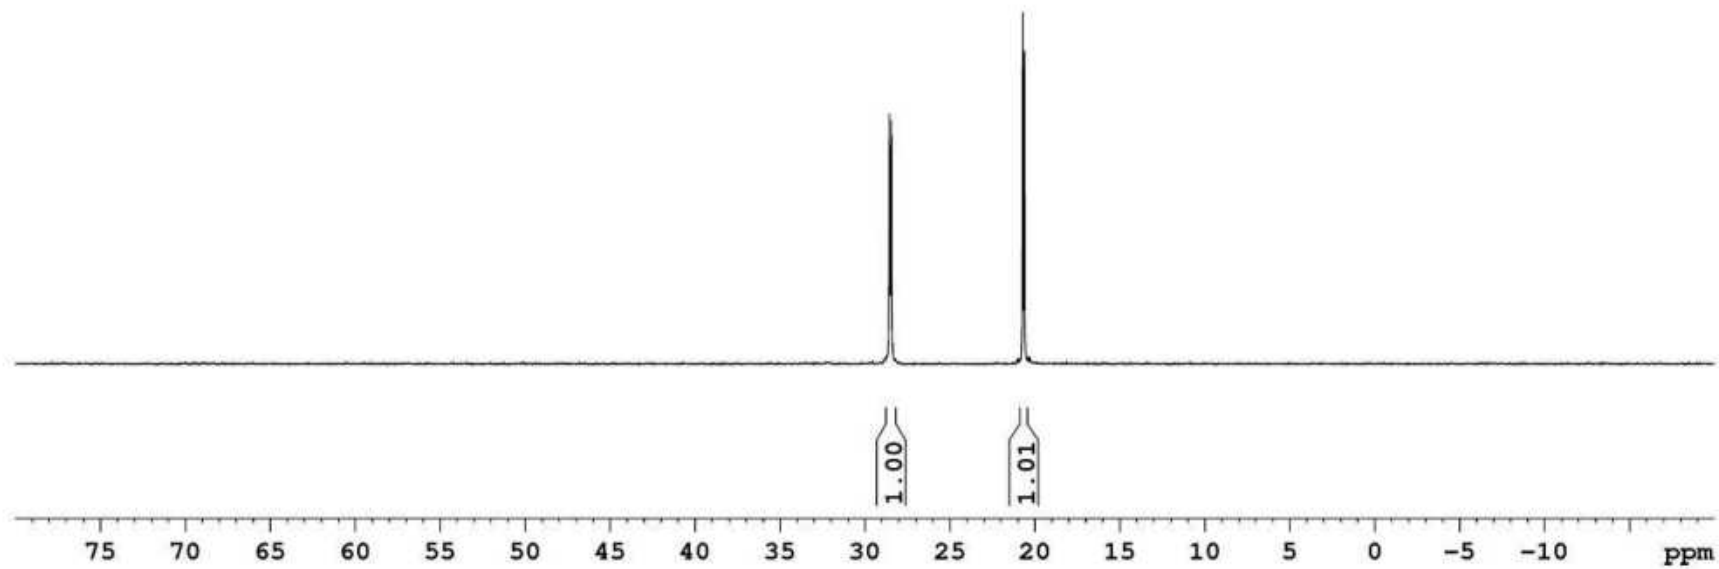

7.72  
7.70  
7.69  
7.67  
7.57  
7.56  
7.55  
7.54  
7.53  
7.40  
7.38  
7.36  
7.33  
7.32  
7.31  
7.30  
7.29  
7.28  
7.27  
7.26  
7.25  
7.24  
7.04  
7.00  
6.95  
6.90

2.57  
2.55  
2.53  
2.51  
1.43  
1.42  
1.40  
1.38  
1.36  
1.20  
1.19  
1.17  
1.16  
1.14  
1.12  
1.11  
1.11  
1.09  
1.09  
1.08  
0.79  
0.77  
0.75

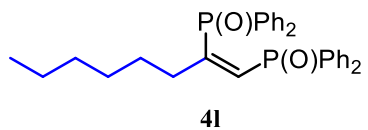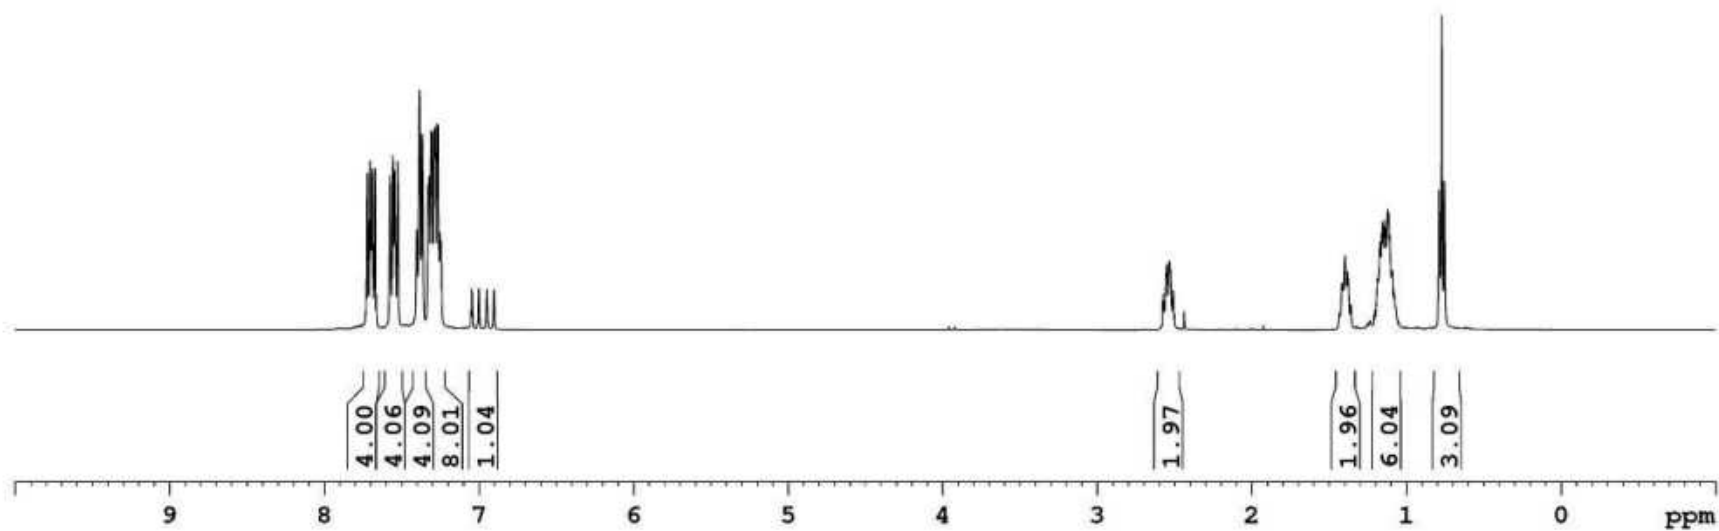

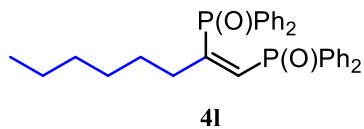

158.03  
 157.21  
 136.54  
 136.45  
 135.56  
 135.48  
 134.64  
 133.57  
 132.40  
 132.30  
 131.89  
 131.83  
 131.80  
 131.35  
 131.33  
 130.88  
 130.78  
 128.34  
 128.22  
 128.07  
 127.95

37.99  
 37.89  
 37.84  
 37.74  
 31.36  
 29.33  
 29.29  
 28.69  
 22.45  
 13.99

136.54  
 136.45  
 135.56  
 135.48  
 134.64  
 133.57  
 132.40  
 132.30  
 131.89  
 131.83  
 131.80  
 131.35  
 131.33  
 130.88  
 130.78

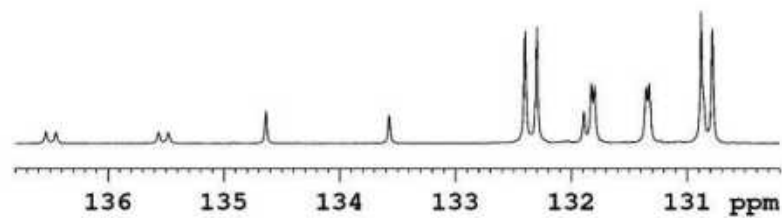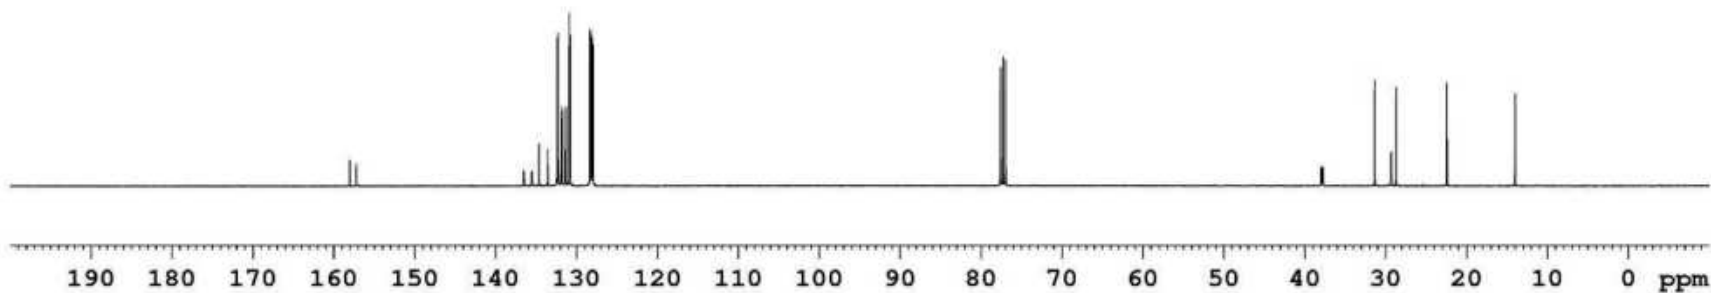

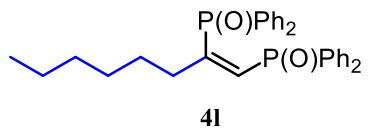

28.16  
28.06

18.79  
18.68

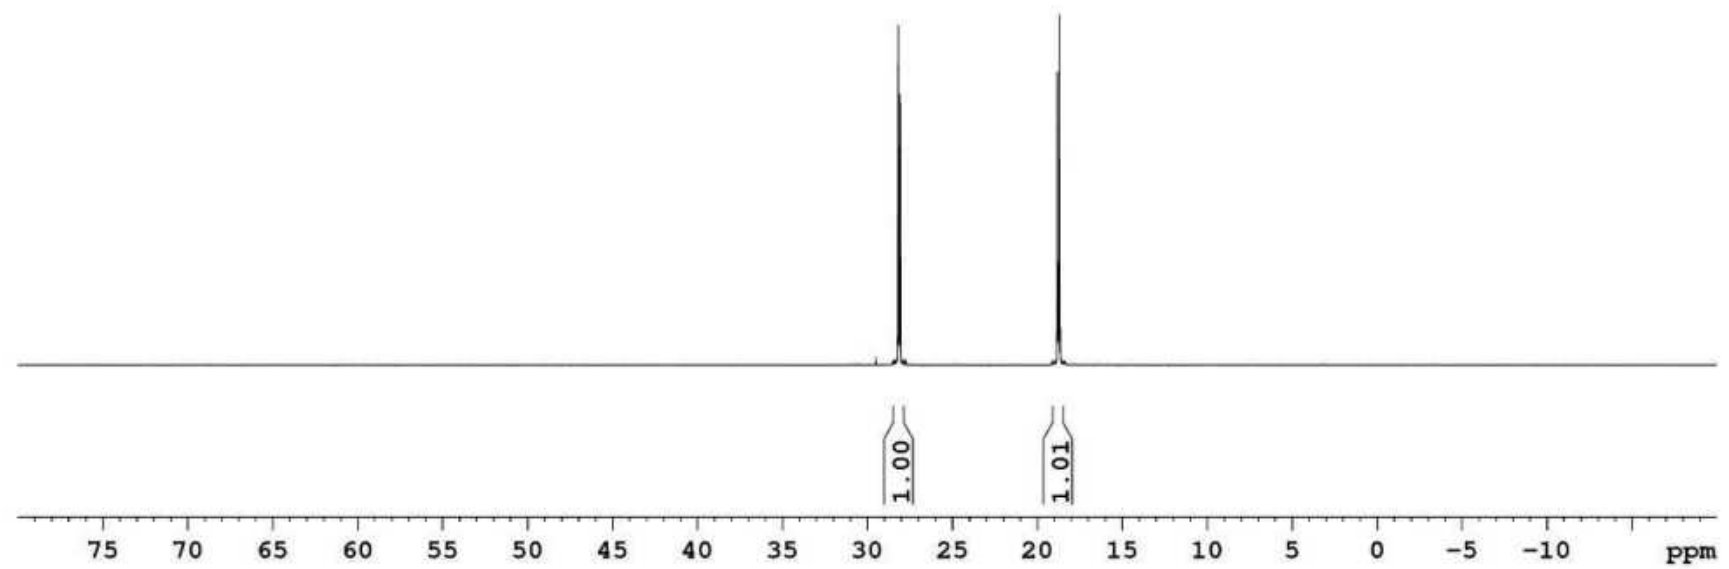

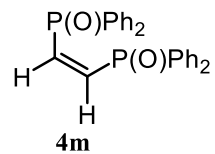

7.70  
7.69  
7.68  
7.67  
7.66  
7.65  
7.48  
7.46  
7.44  
7.38  
7.36  
7.34  
7.30  
7.26  
7.21

7.70  
7.69  
7.68  
7.67  
7.66  
7.65

7.48  
7.46  
7.44

7.38  
7.36  
7.34

7.30

7.26

7.21

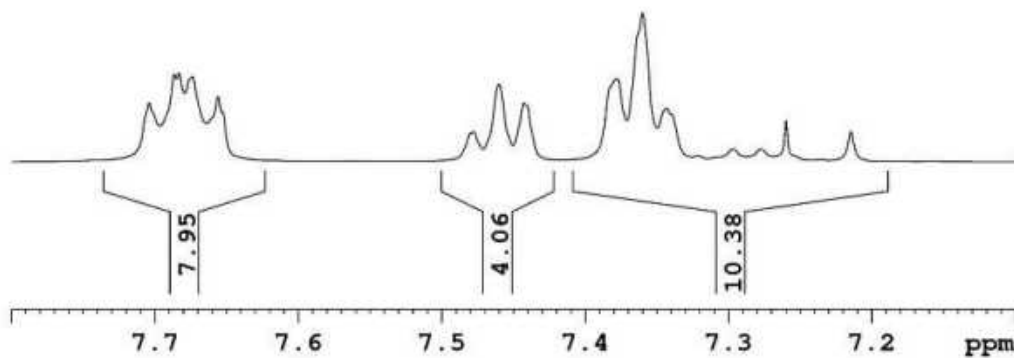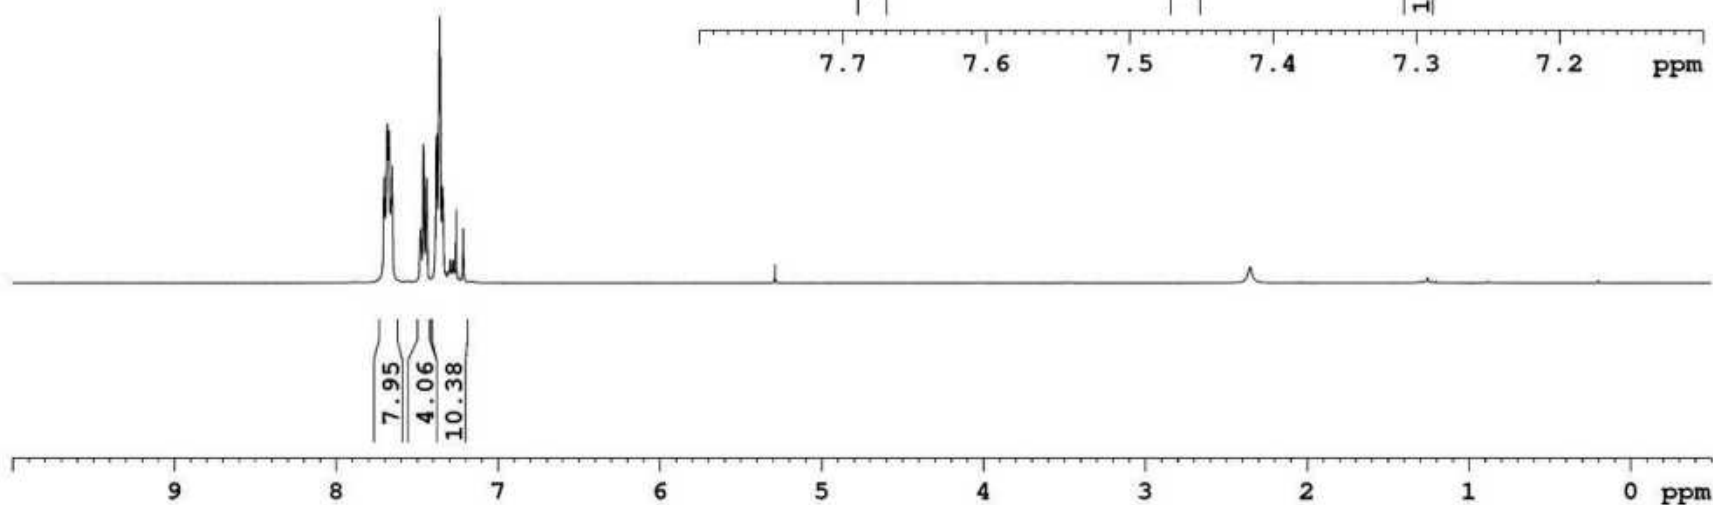



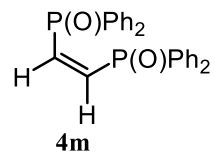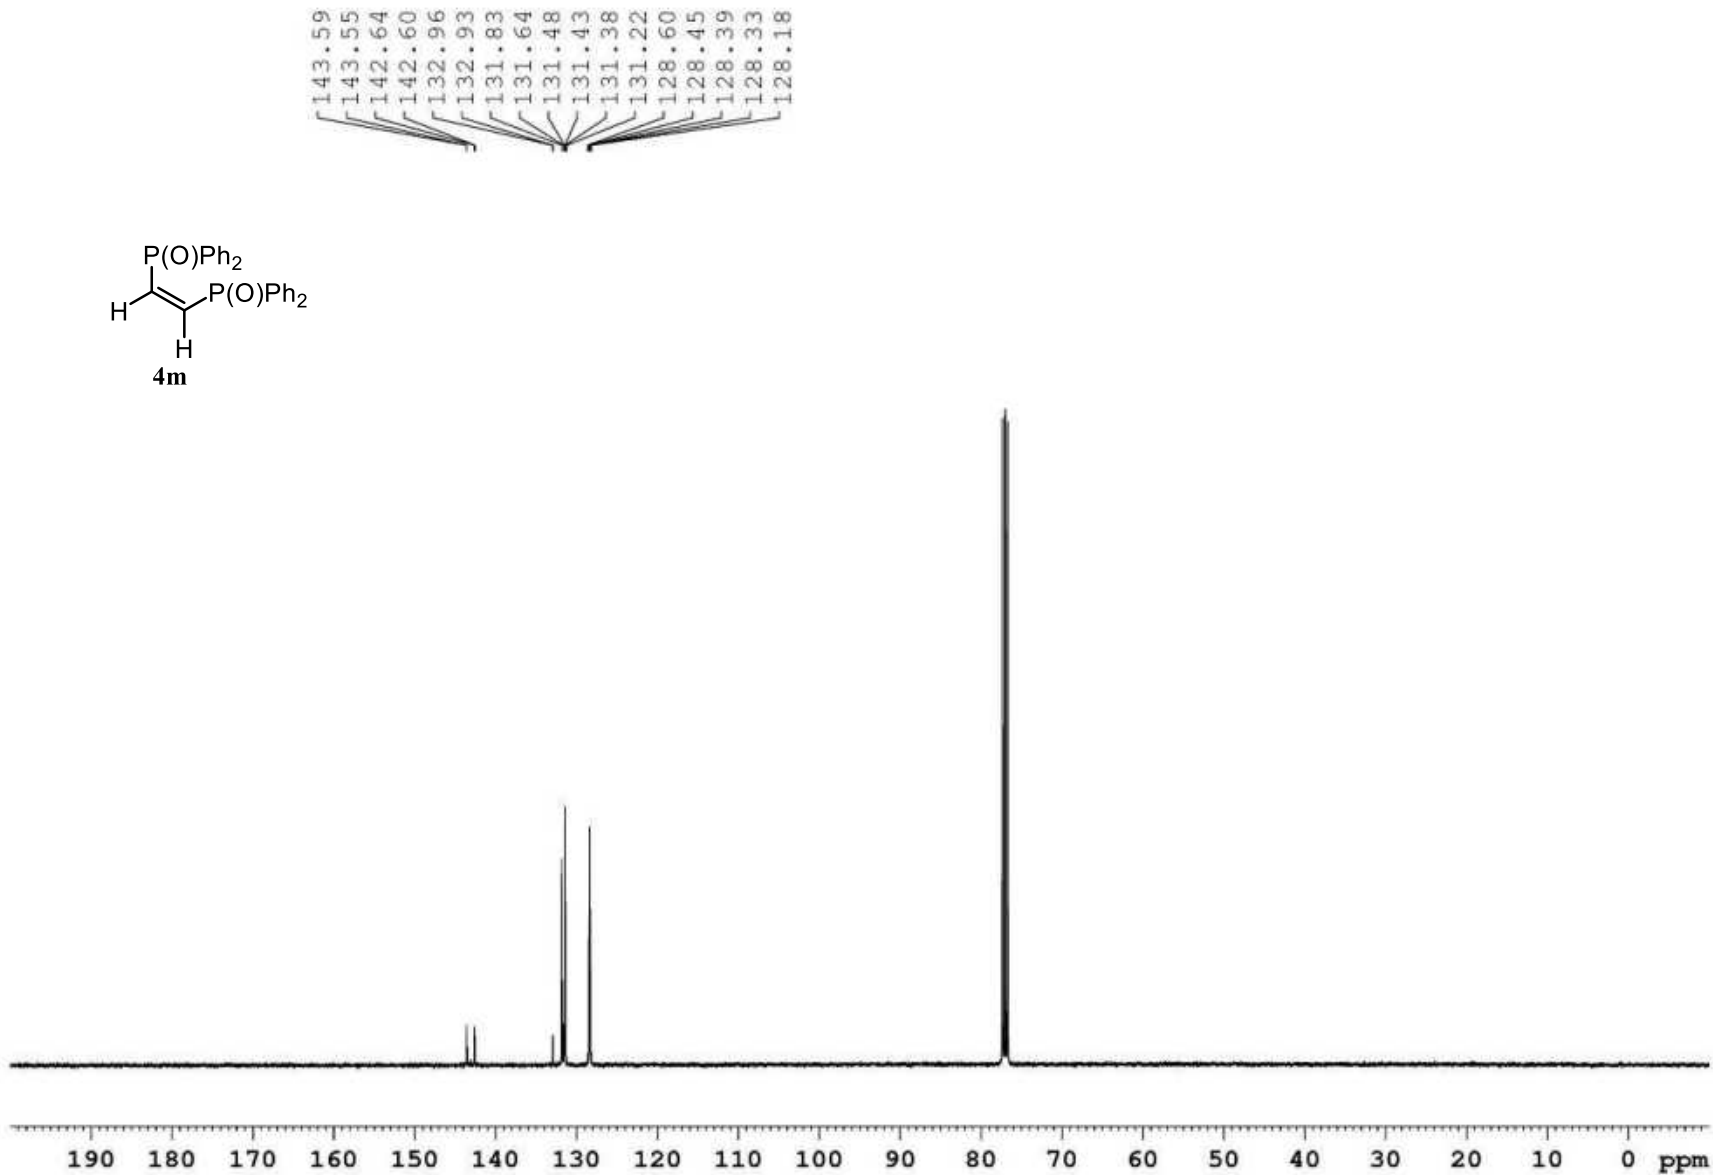

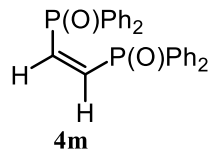

— 20.66

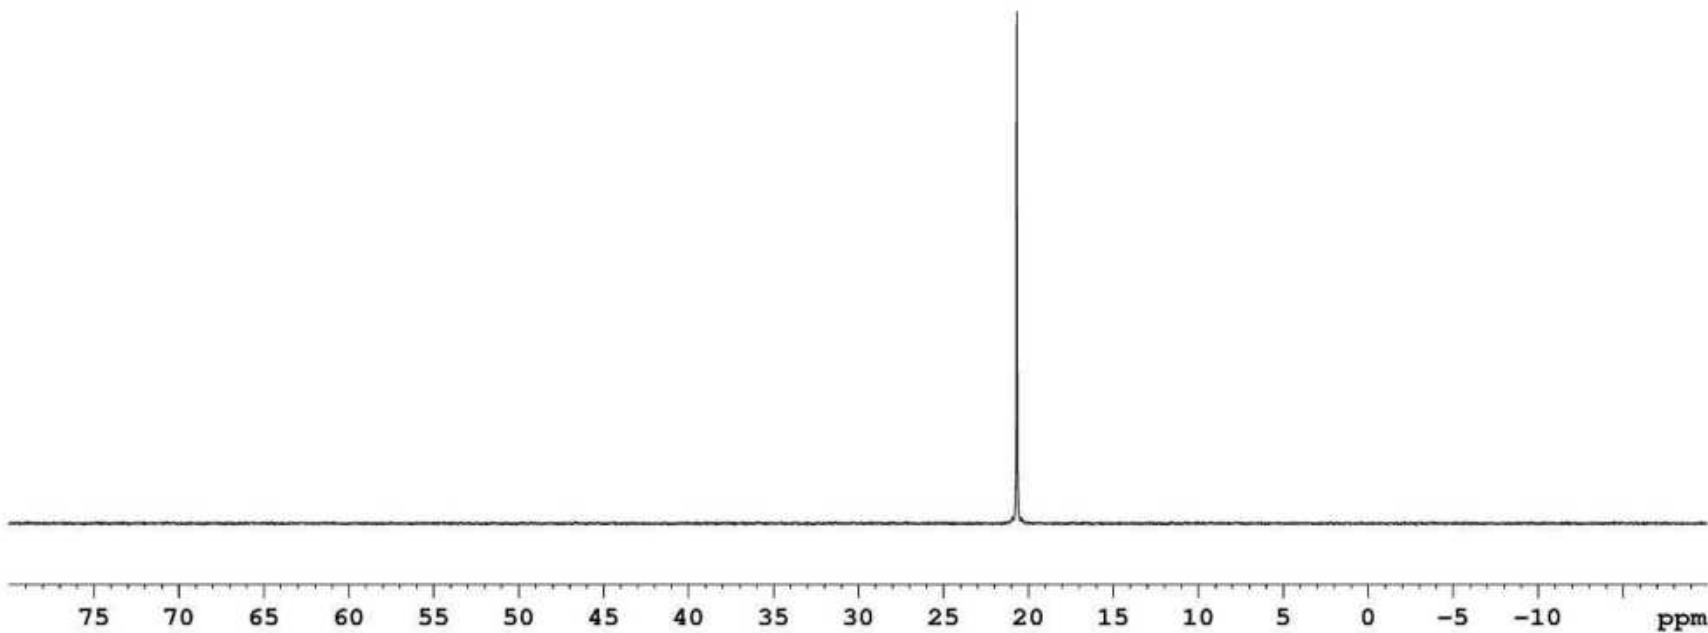

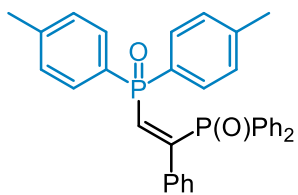

5a

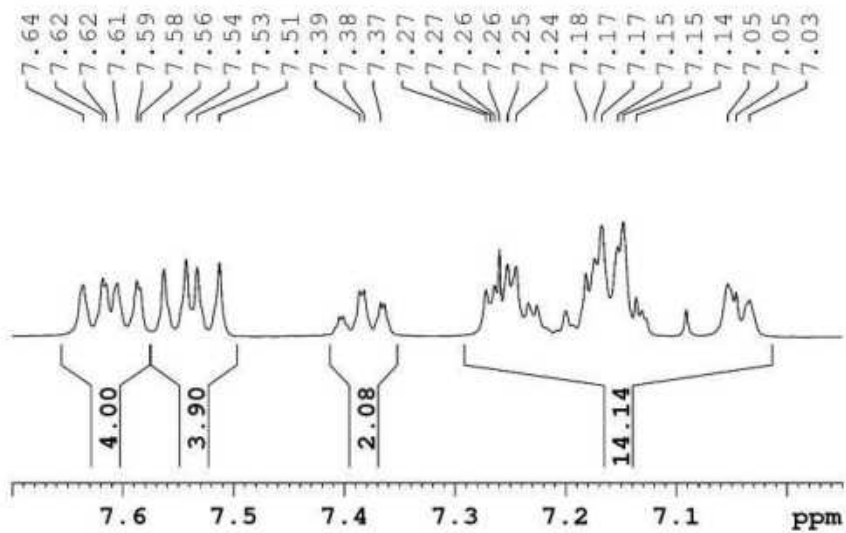

— 2.34

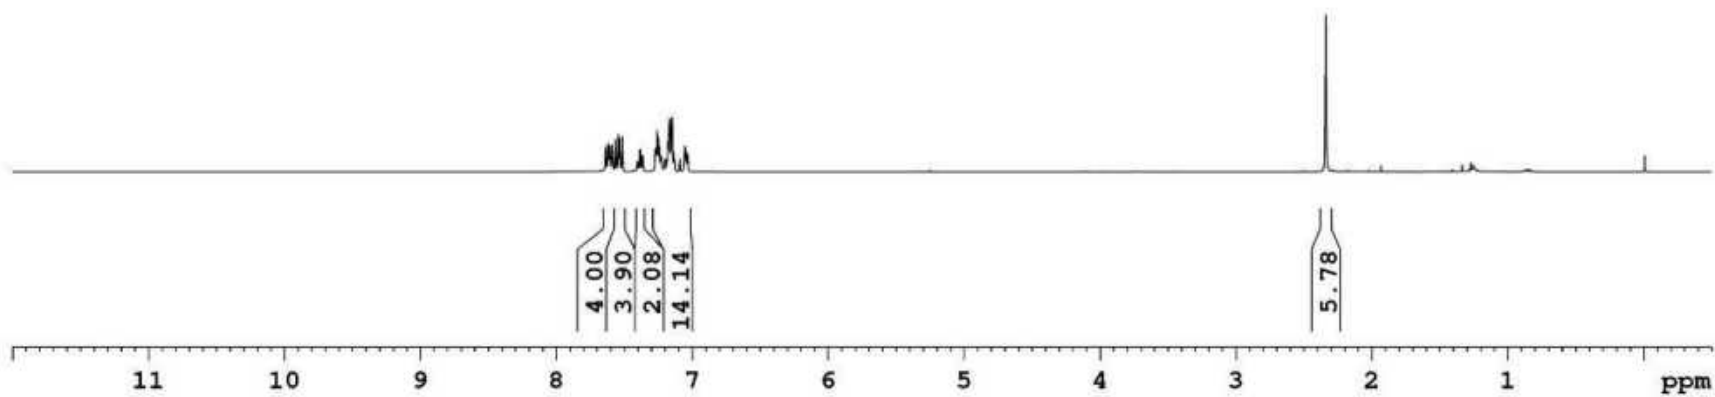

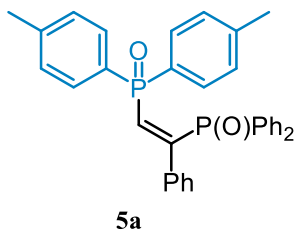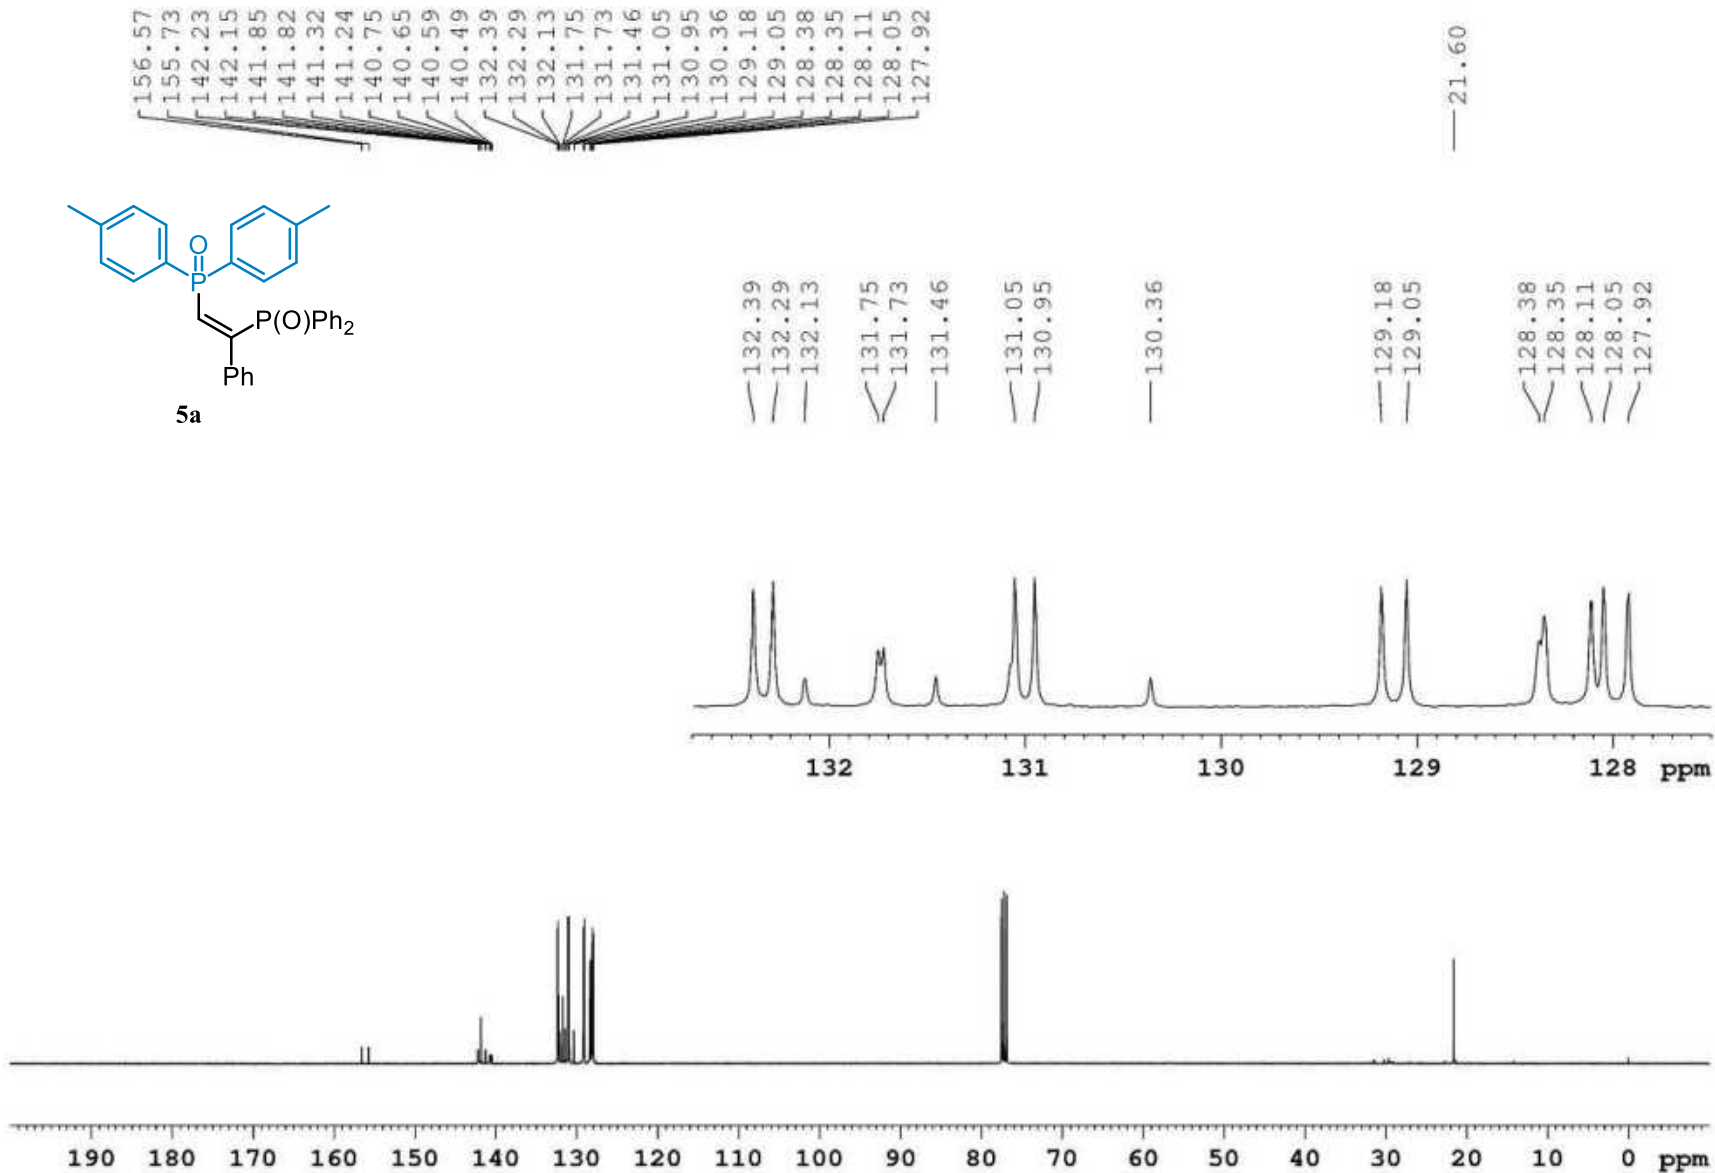

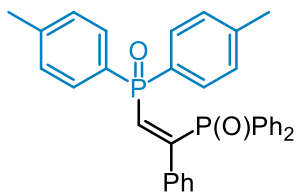

5a

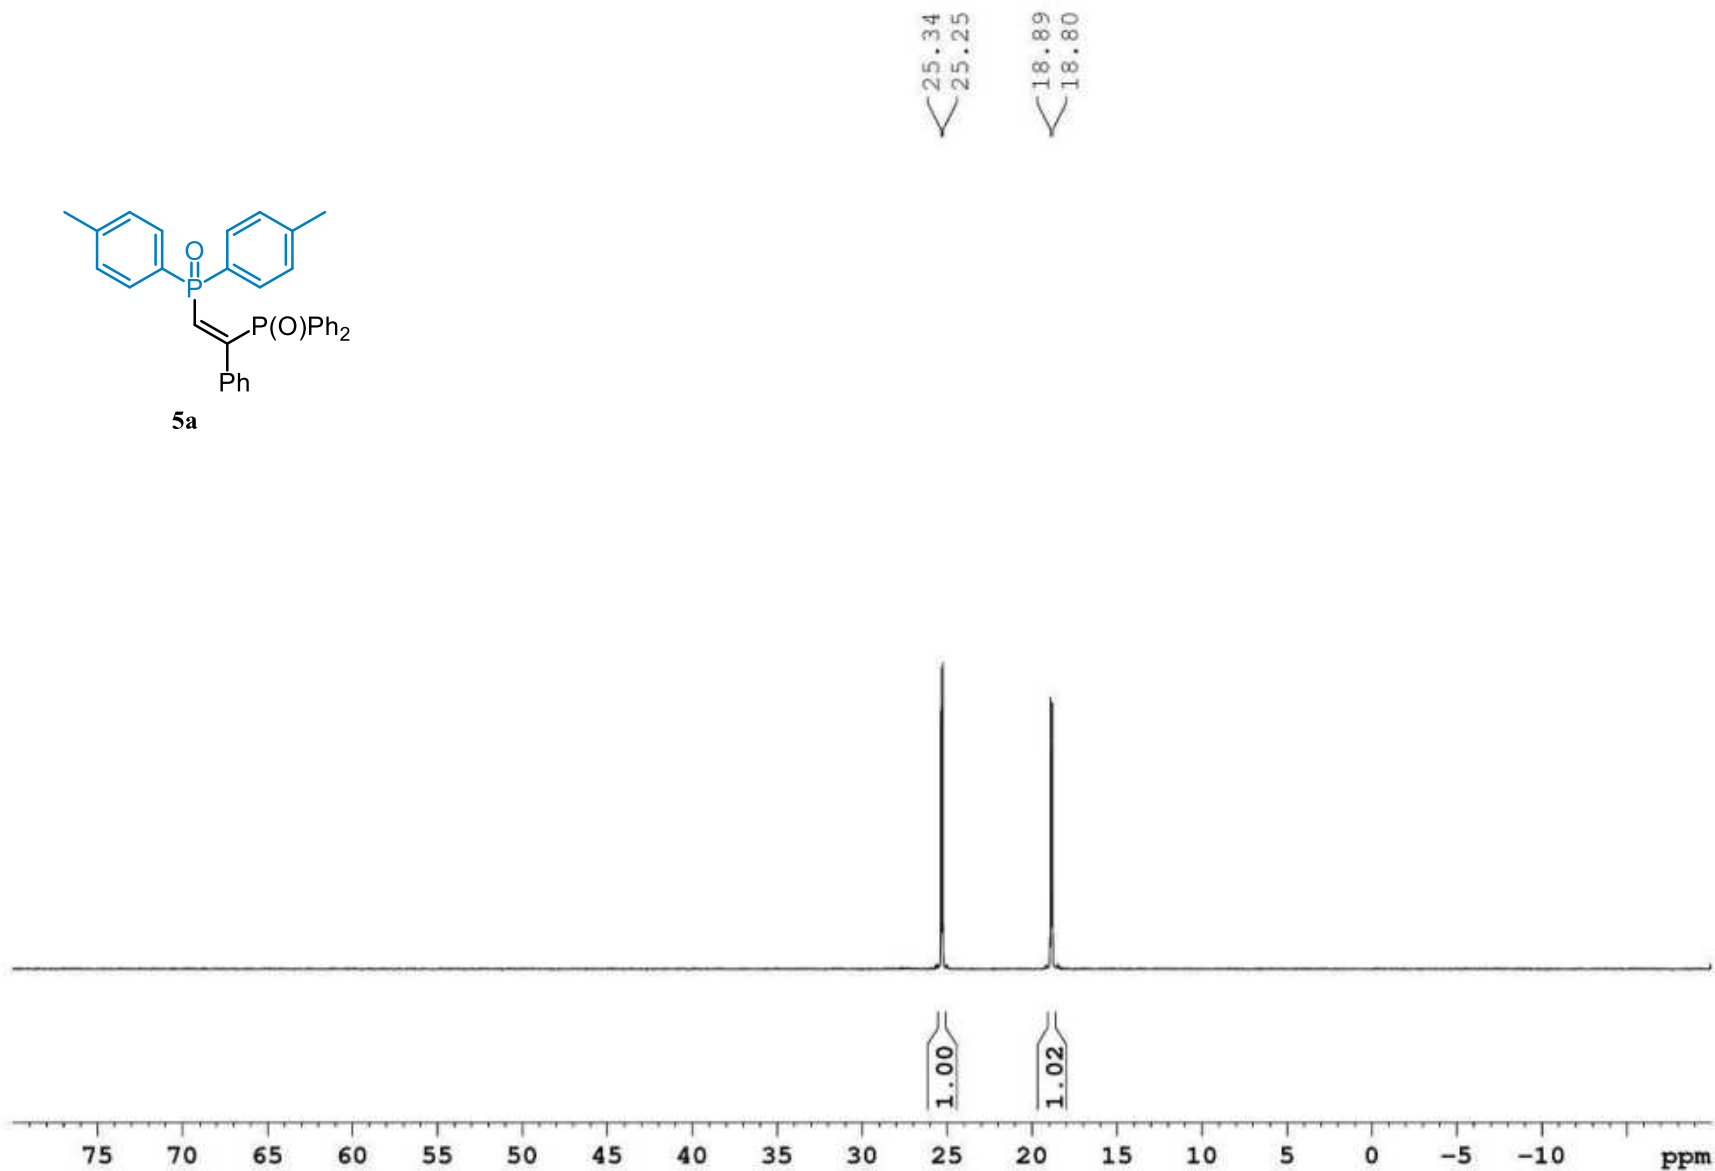

7.66  
7.64  
7.63  
7.62  
7.61  
7.60  
7.43  
7.42  
7.40  
7.31  
7.29  
7.27  
7.24  
7.23  
7.21  
7.19  
7.18  
7.16  
7.10  
7.08  
7.06  
6.90  
6.88

3.83

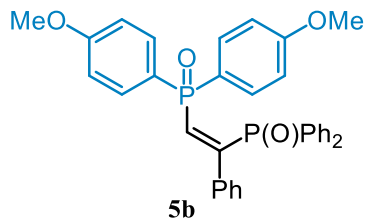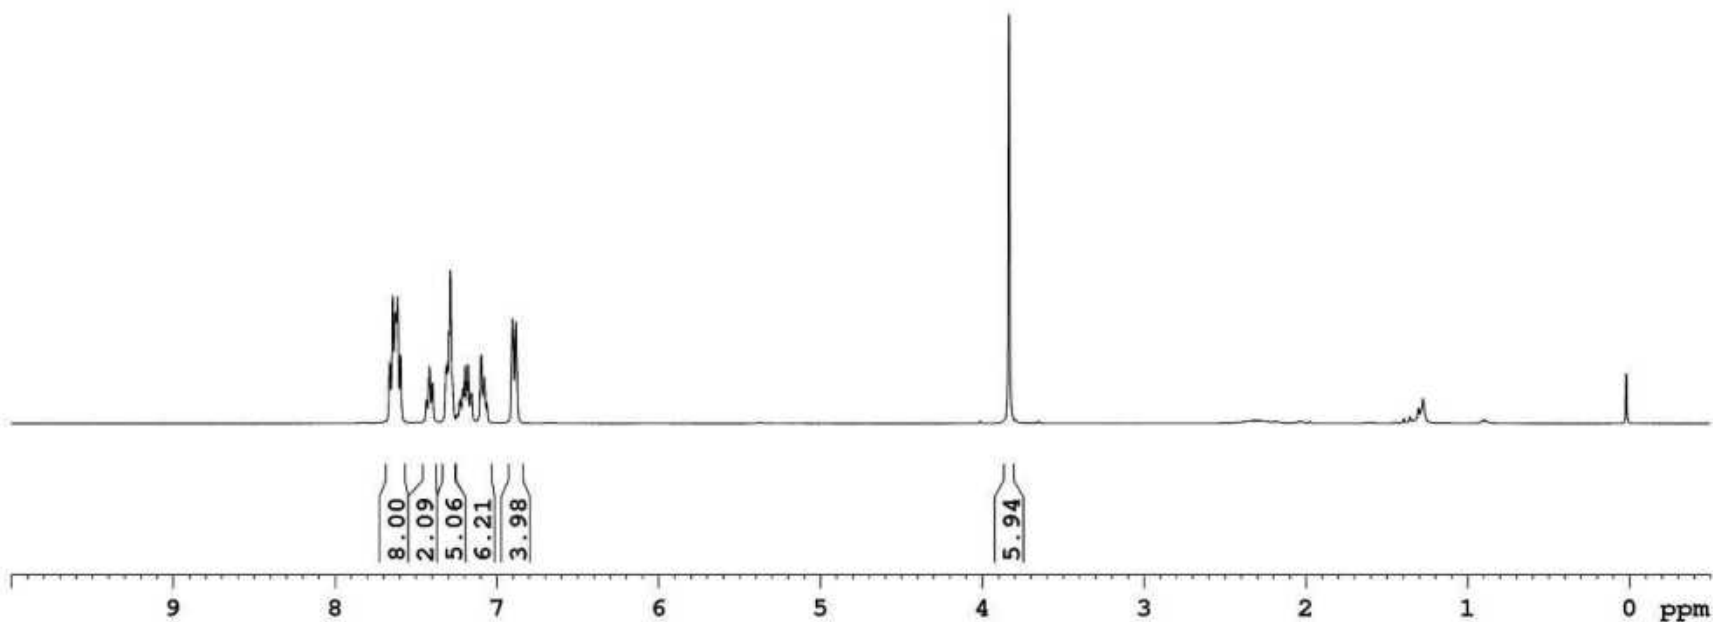

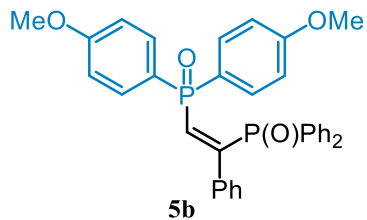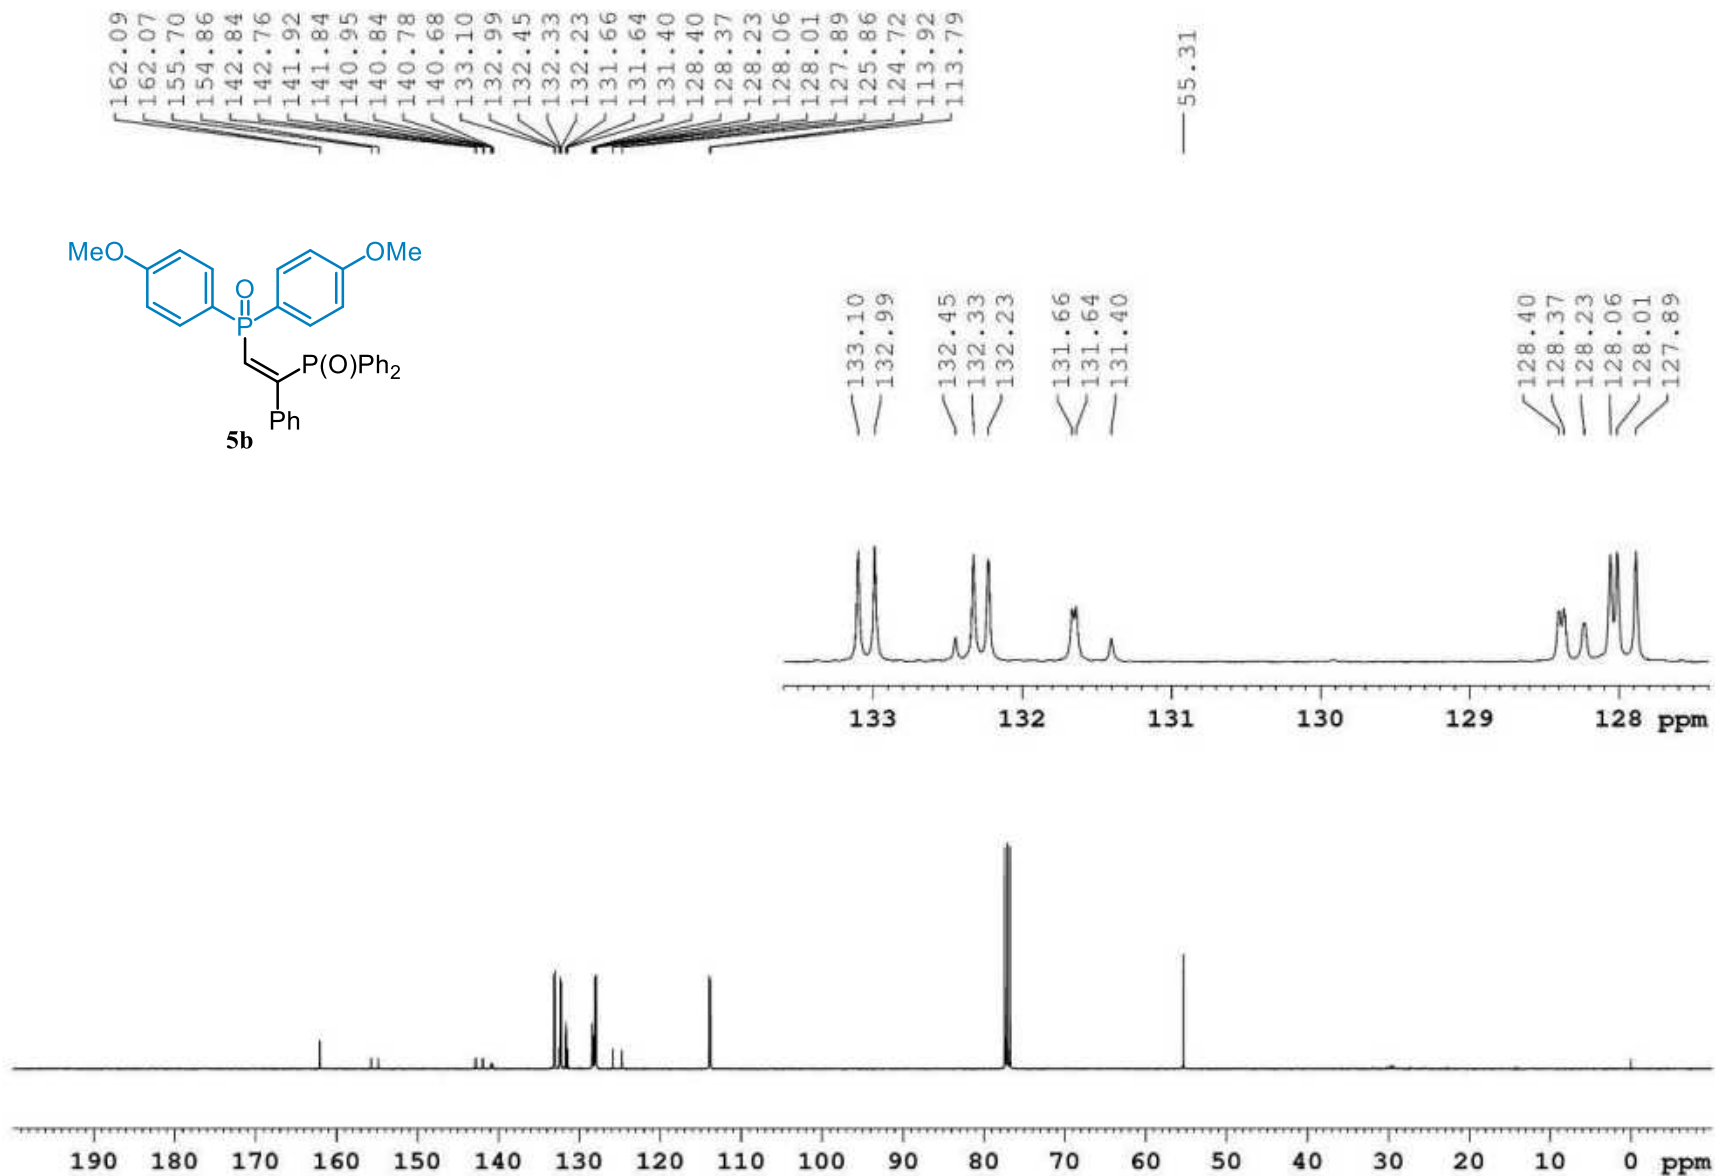

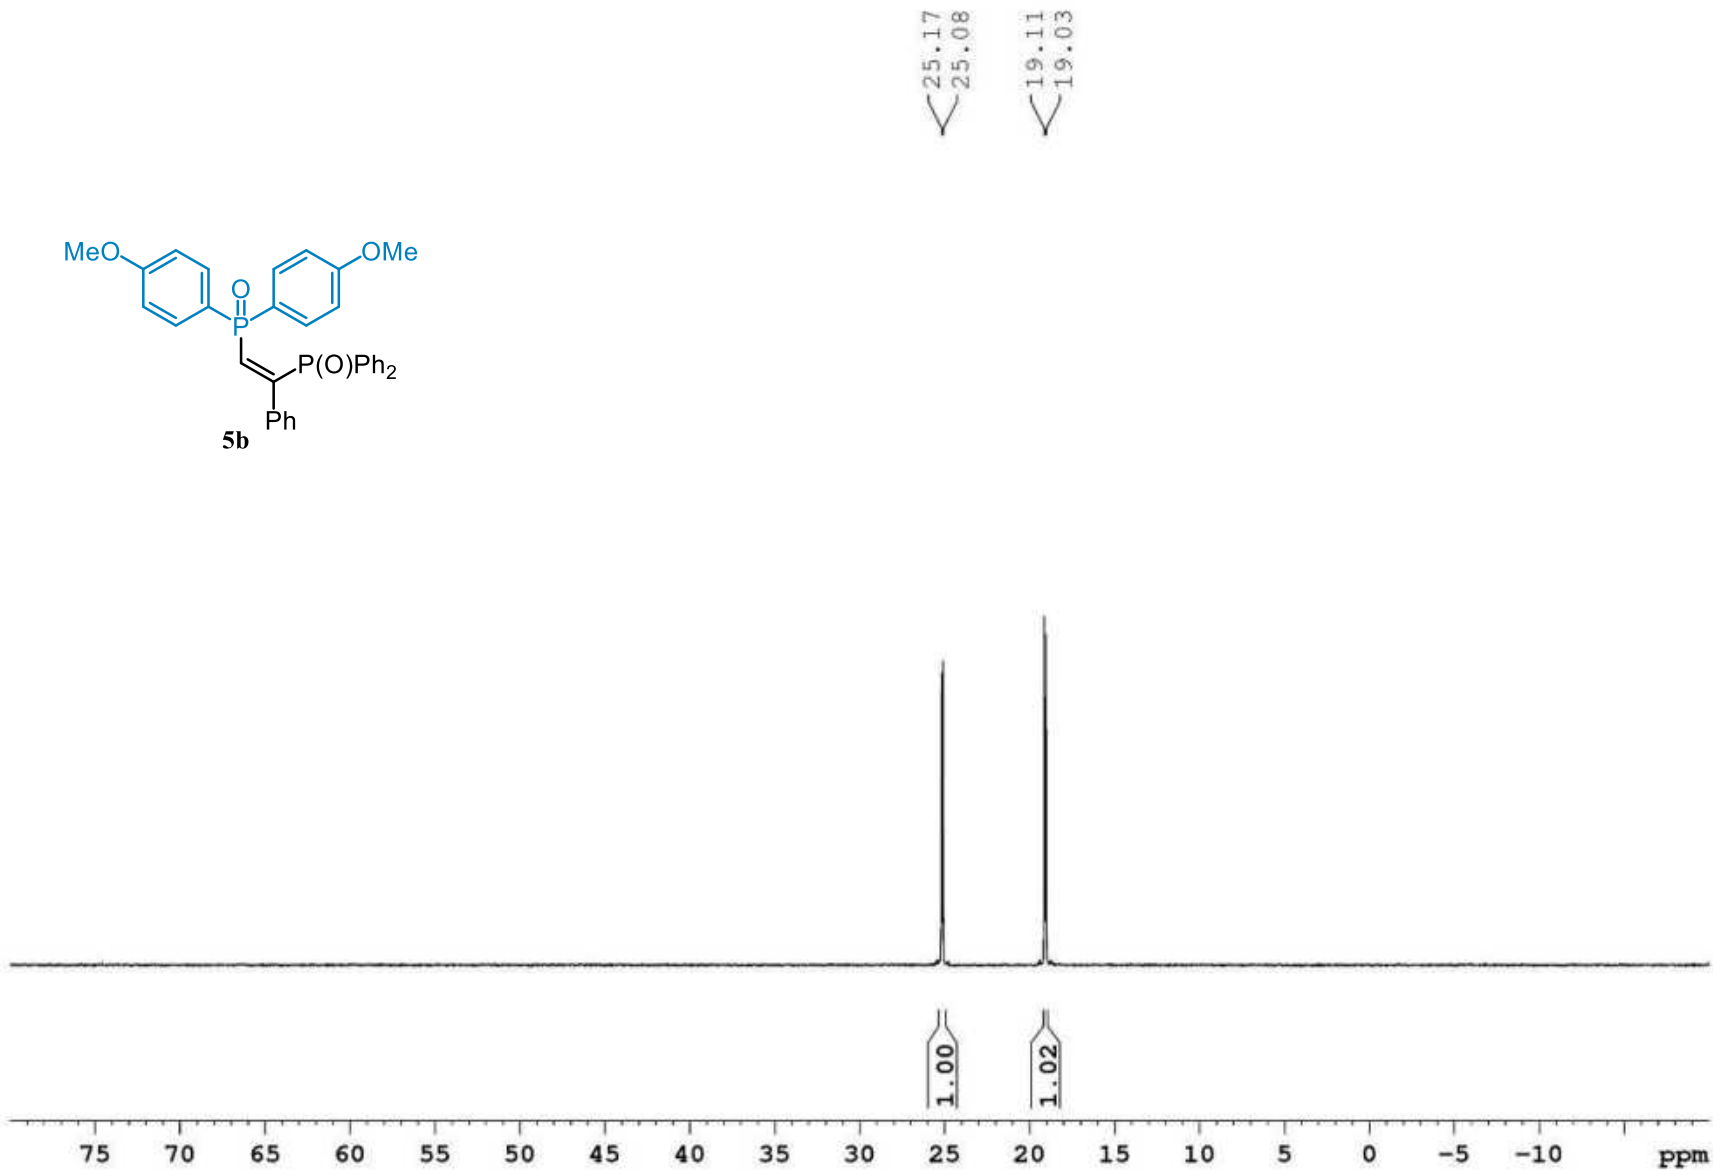



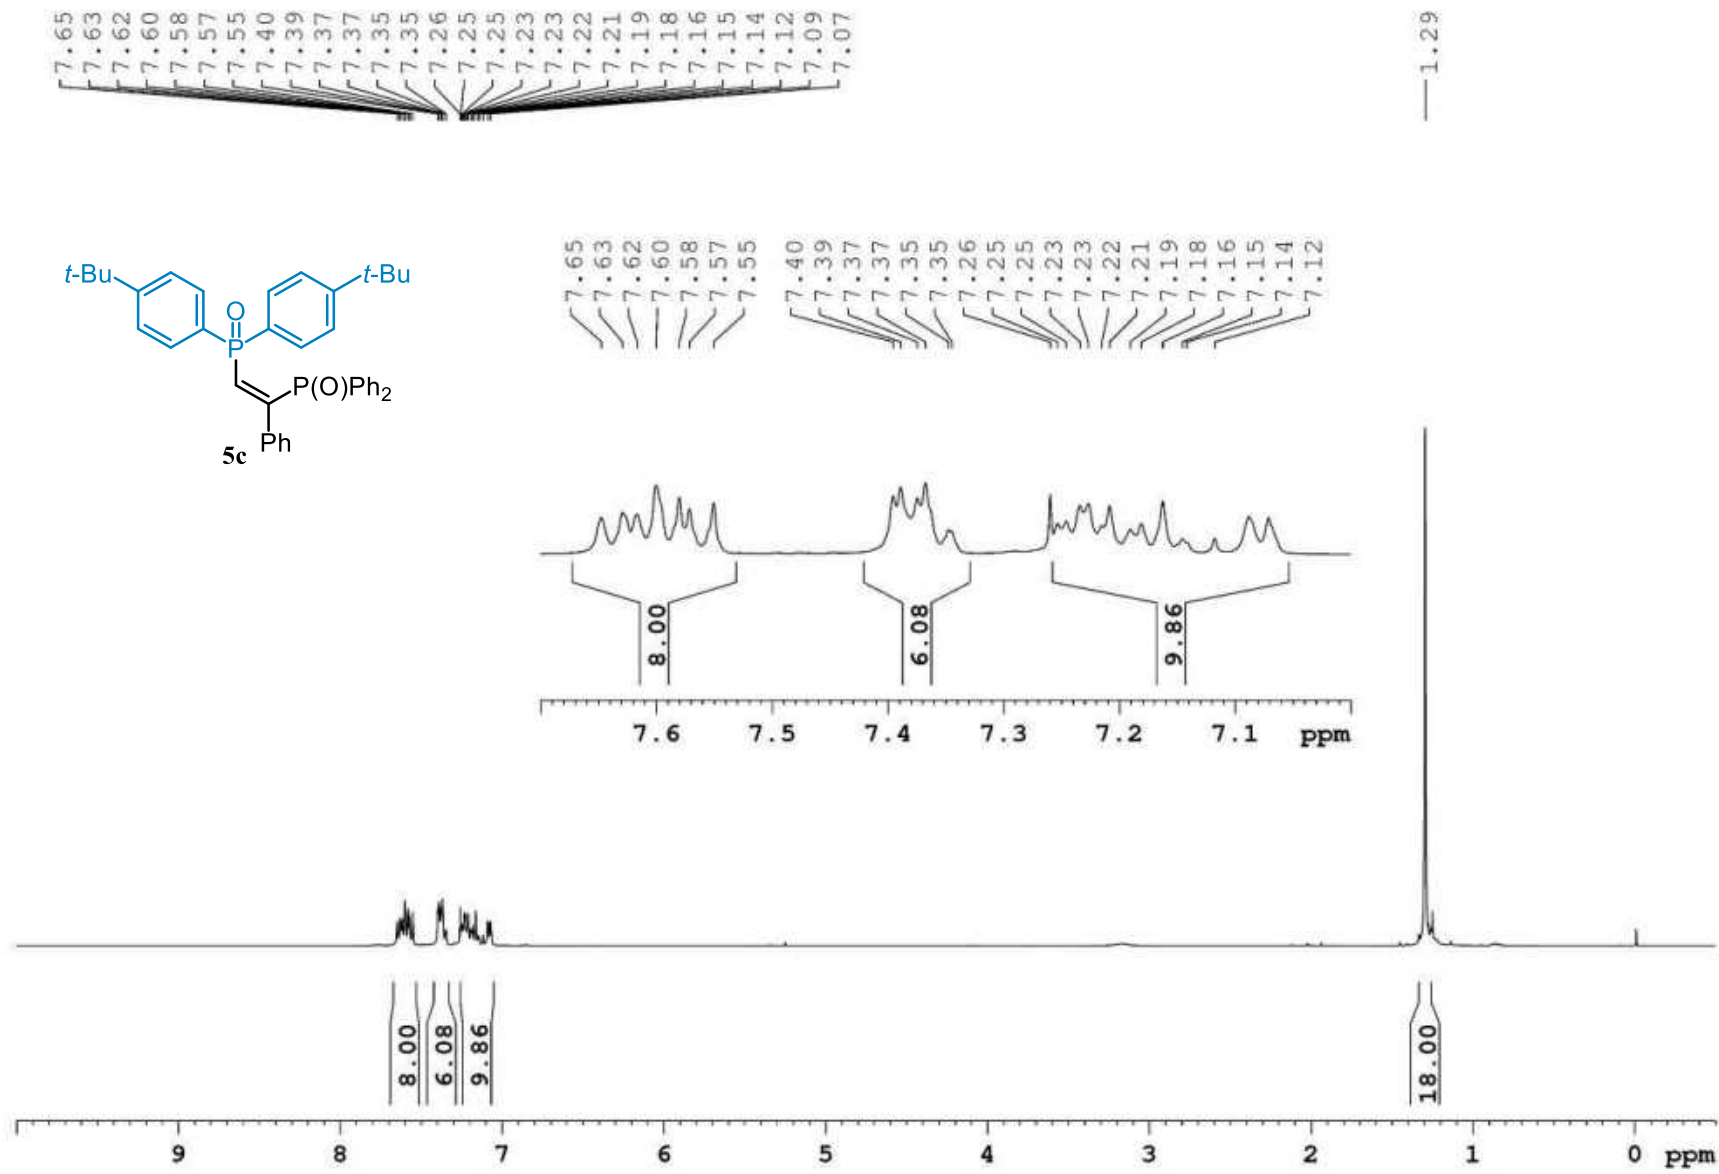

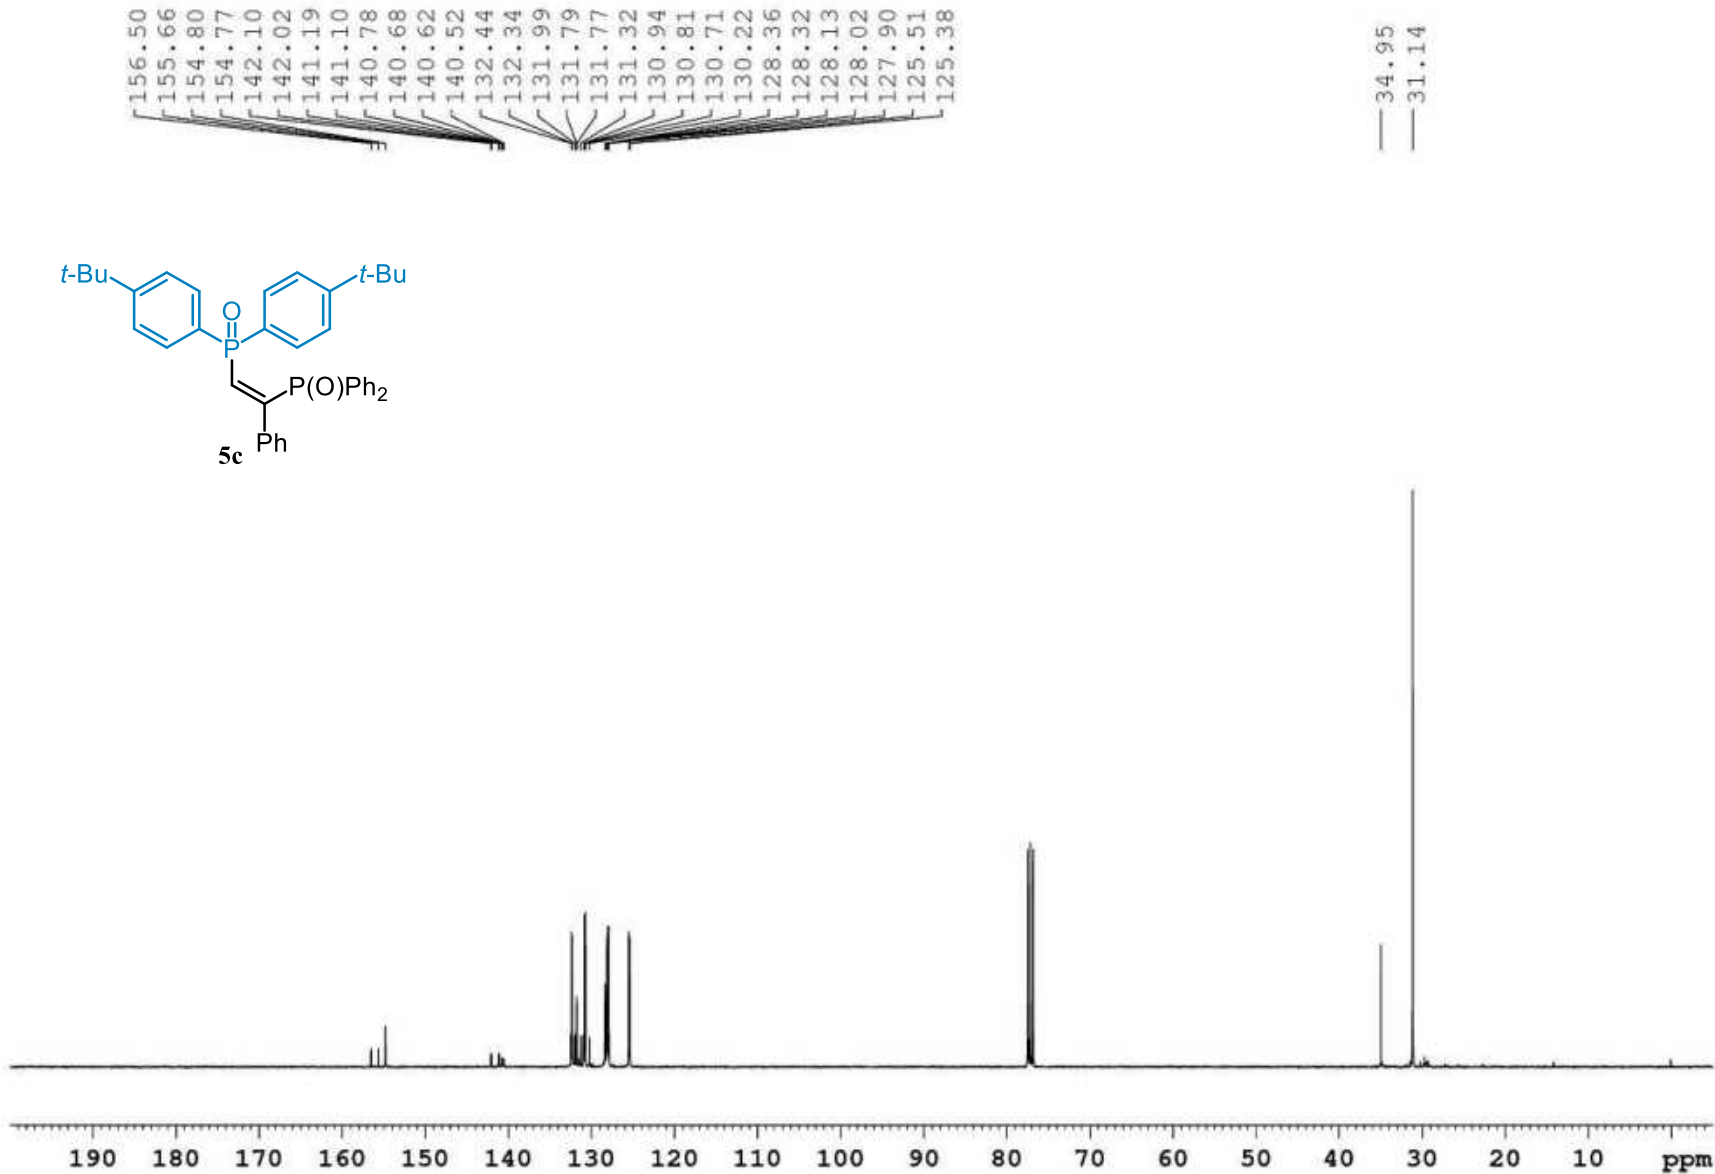

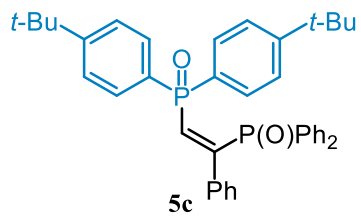

25.66  
25.57

18.16  
18.08

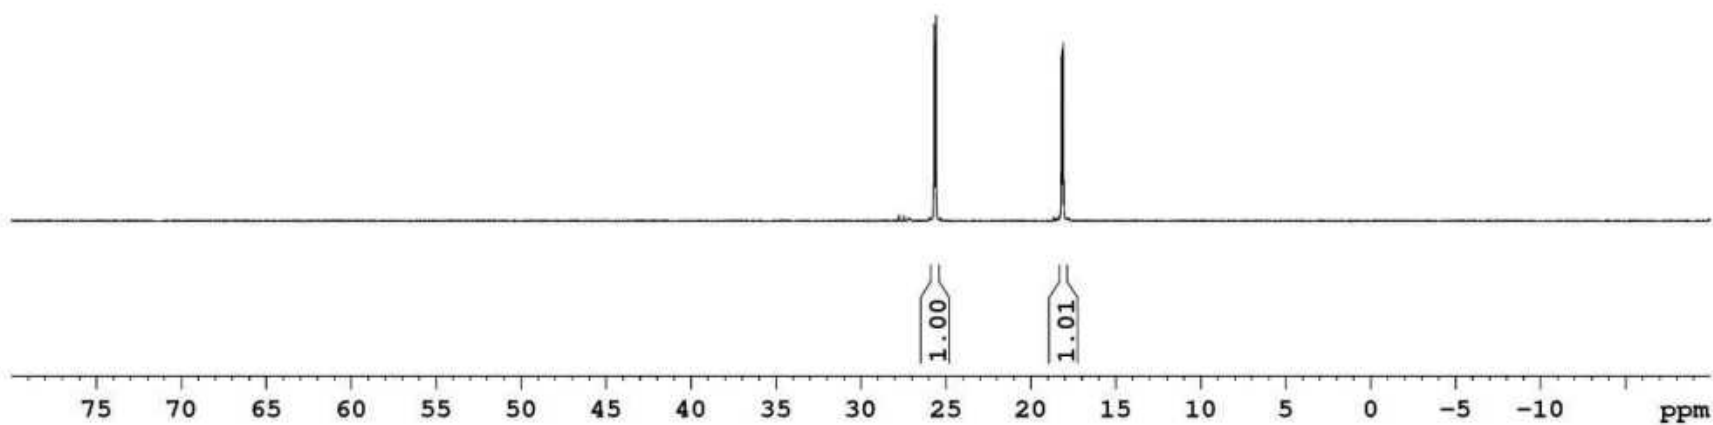

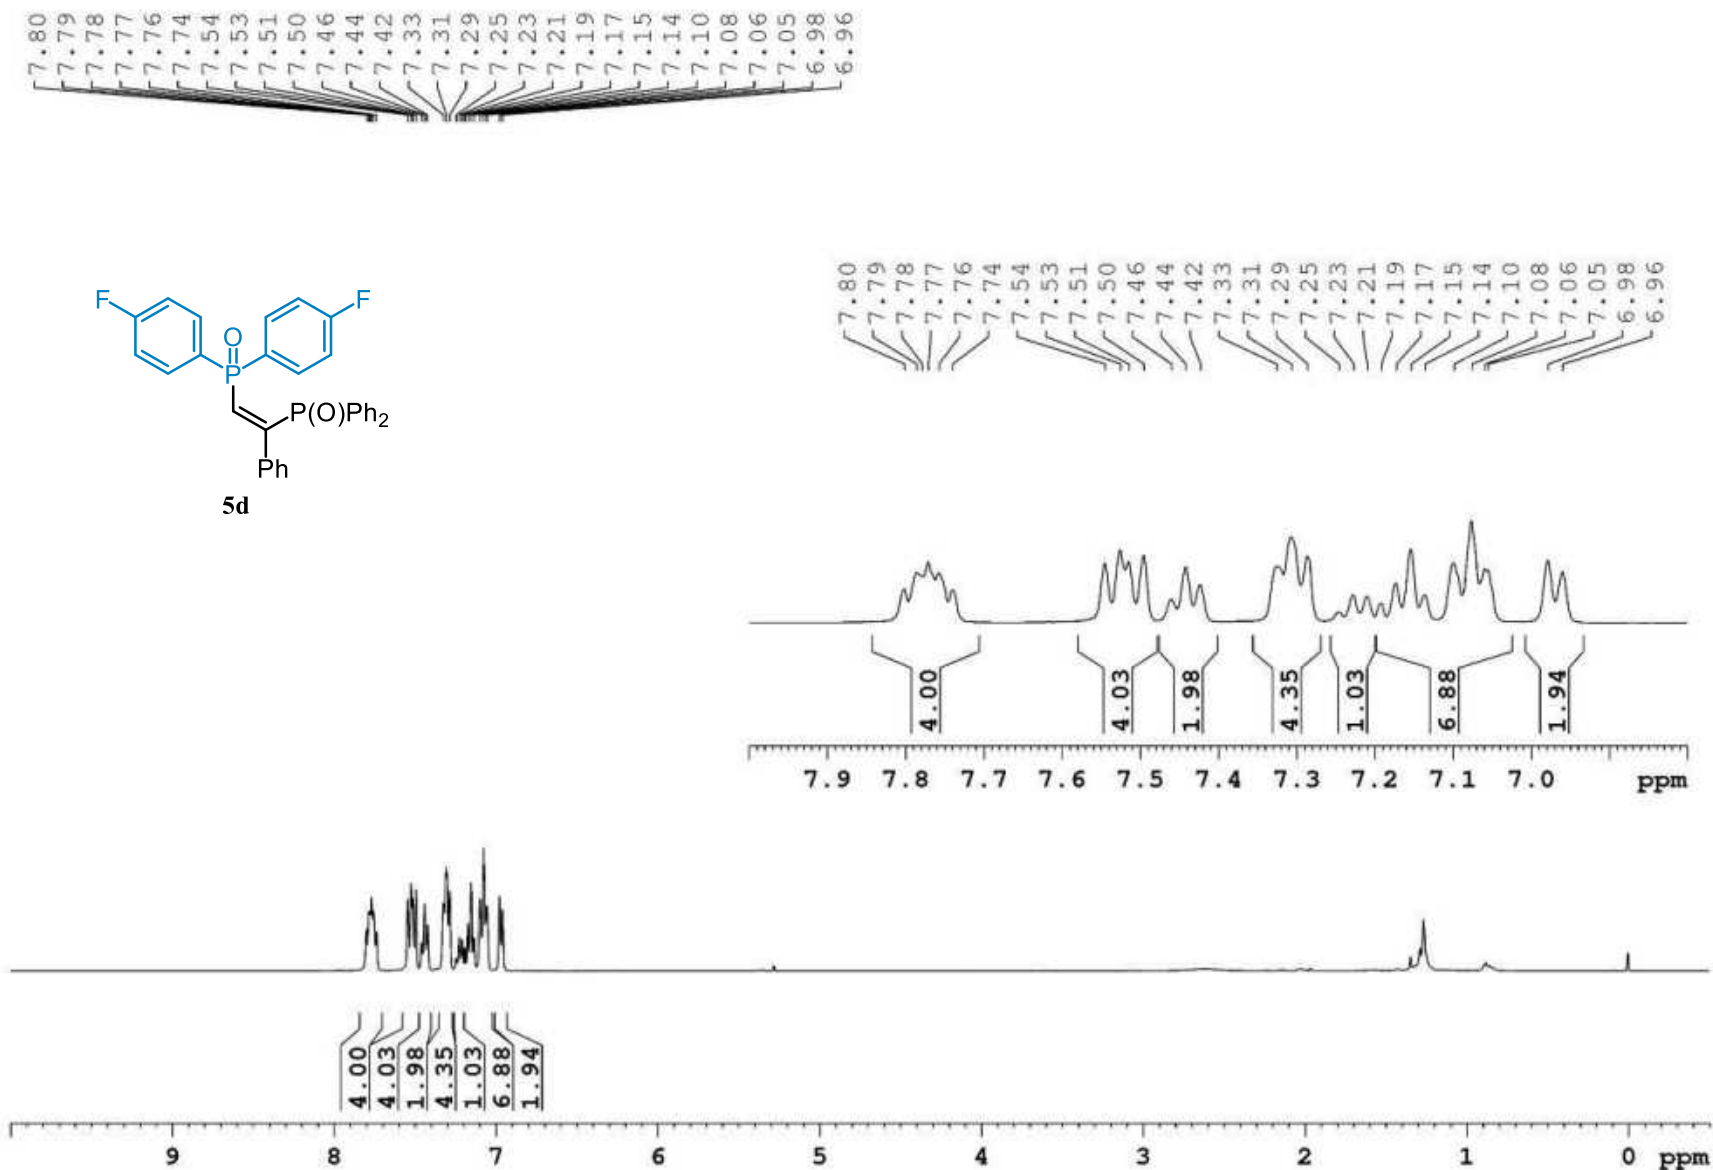

166.06  
166.03  
163.55  
163.52  
157.43  
156.60  
142.22  
142.15  
141.29  
141.21  
140.12  
140.02  
139.96  
139.85  
133.82  
133.73  
133.71  
133.62  
132.23  
132.13  
132.03  
132.00  
131.65  
130.61  
130.49  
130.45  
129.37  
129.34  
128.59  
128.31  
128.28  
128.23  
128.20  
128.11  
115.82  
115.68  
115.60  
115.47

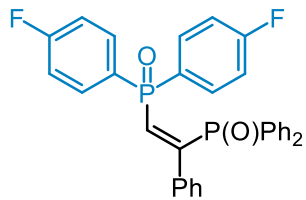

5d

< 166.06  
< 166.03  
  
< 163.55  
< 163.52  
  
— 157.43  
— 156.60  
  
< 132.23  
< 132.13  
< 132.03  
< 132.00  
< 131.65  
  
< 130.61  
< 130.49  
< 130.45  
  
< 129.37  
< 129.34  
  
< 128.59  
< 128.31  
< 128.28  
< 128.23  
< 128.20  
< 128.11

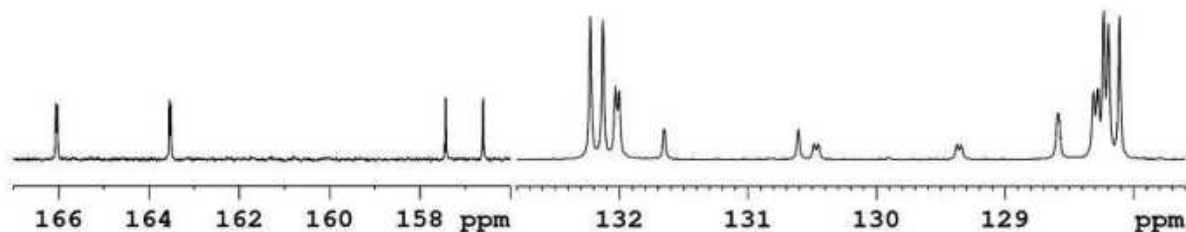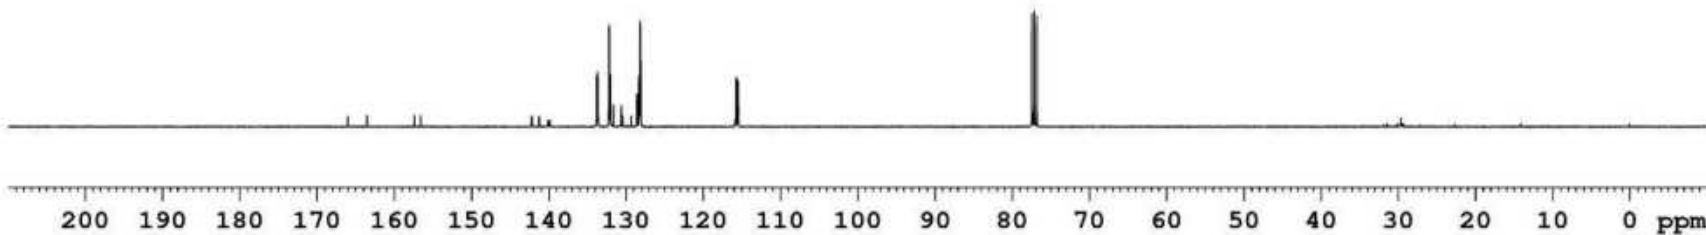

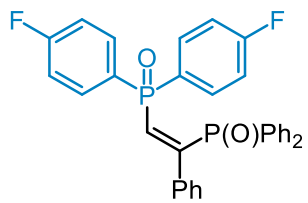

5d

24.64  
24.56  
18.93  
18.84

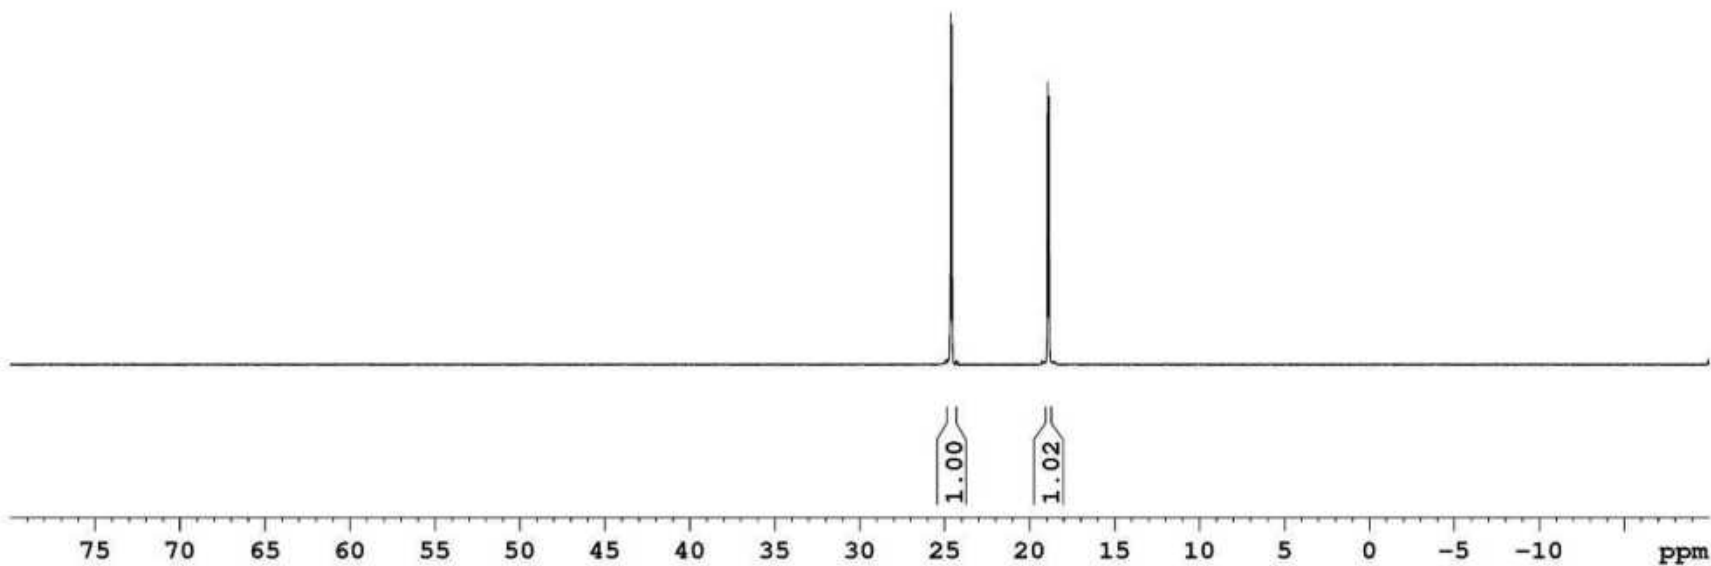

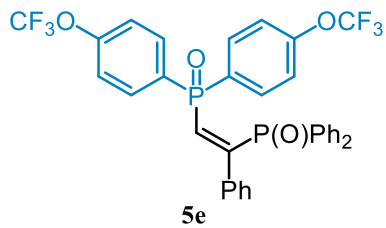

7.85  
7.83  
7.82  
7.80  
7.49  
7.47  
7.46  
7.44  
7.42  
7.31  
7.29  
7.27  
7.26  
7.23  
7.21  
7.18  
7.17  
7.15  
7.13  
7.09  
7.05  
6.95  
6.93

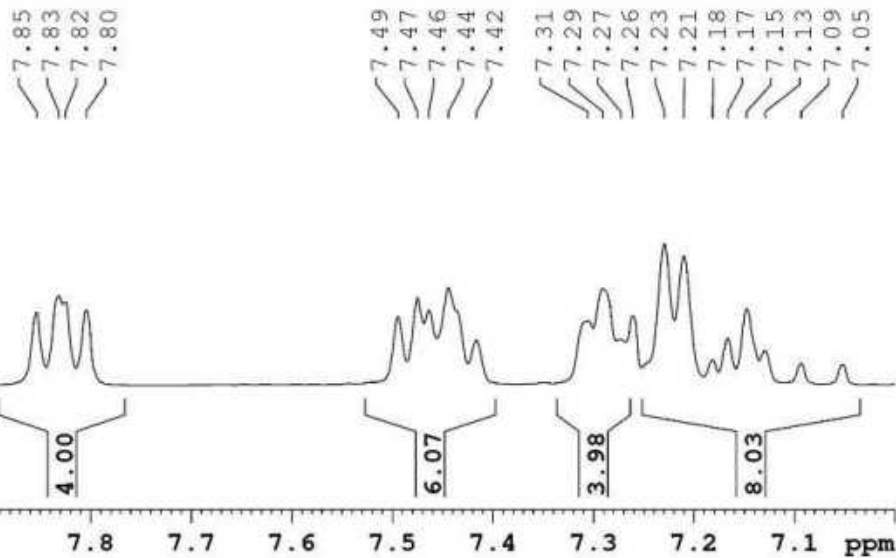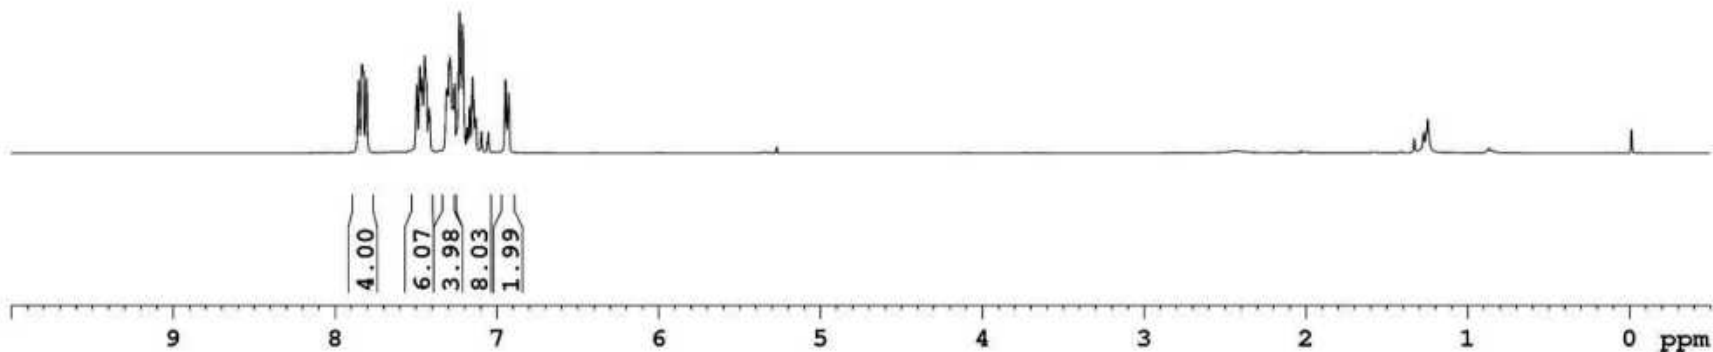



158.14  
 157.32  
 151.61  
 151.60  
 151.59  
 151.57  
 141.74  
 141.67  
 140.80  
 140.72  
 139.80  
 139.69  
 139.63  
 139.53  
 133.25  
 133.14  
 132.24  
 132.14  
 131.29  
 130.25  
 128.75  
 128.29  
 128.26  
 128.16  
 124.17  
 121.60  
 120.43  
 120.30  
 119.03  
 116.46

133.25  
 133.14

132.24  
 132.14

131.29

130.25

128.75  
 128.29

128.26  
 128.16

124.17

121.60

120.43  
 120.30

119.03

116.46

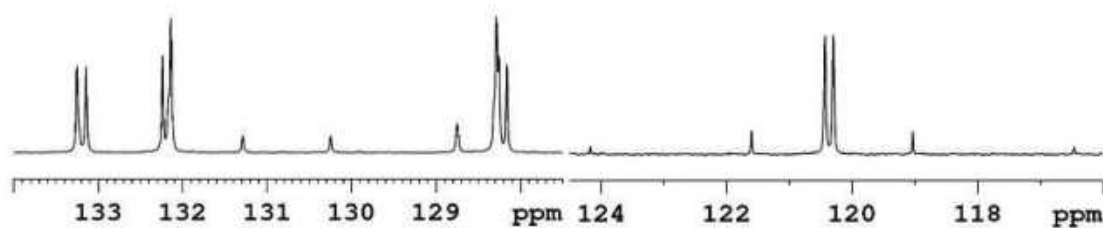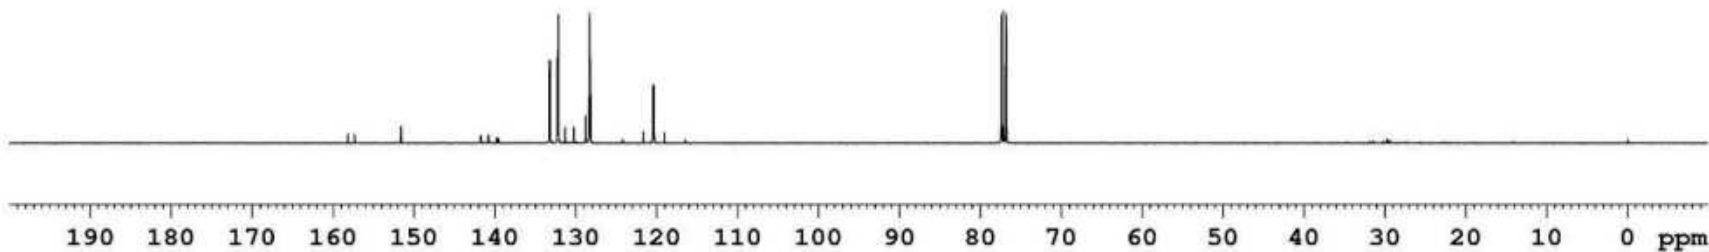



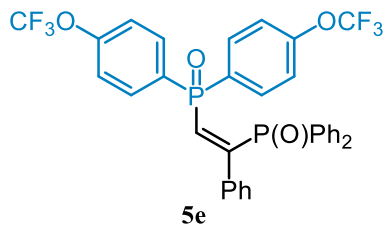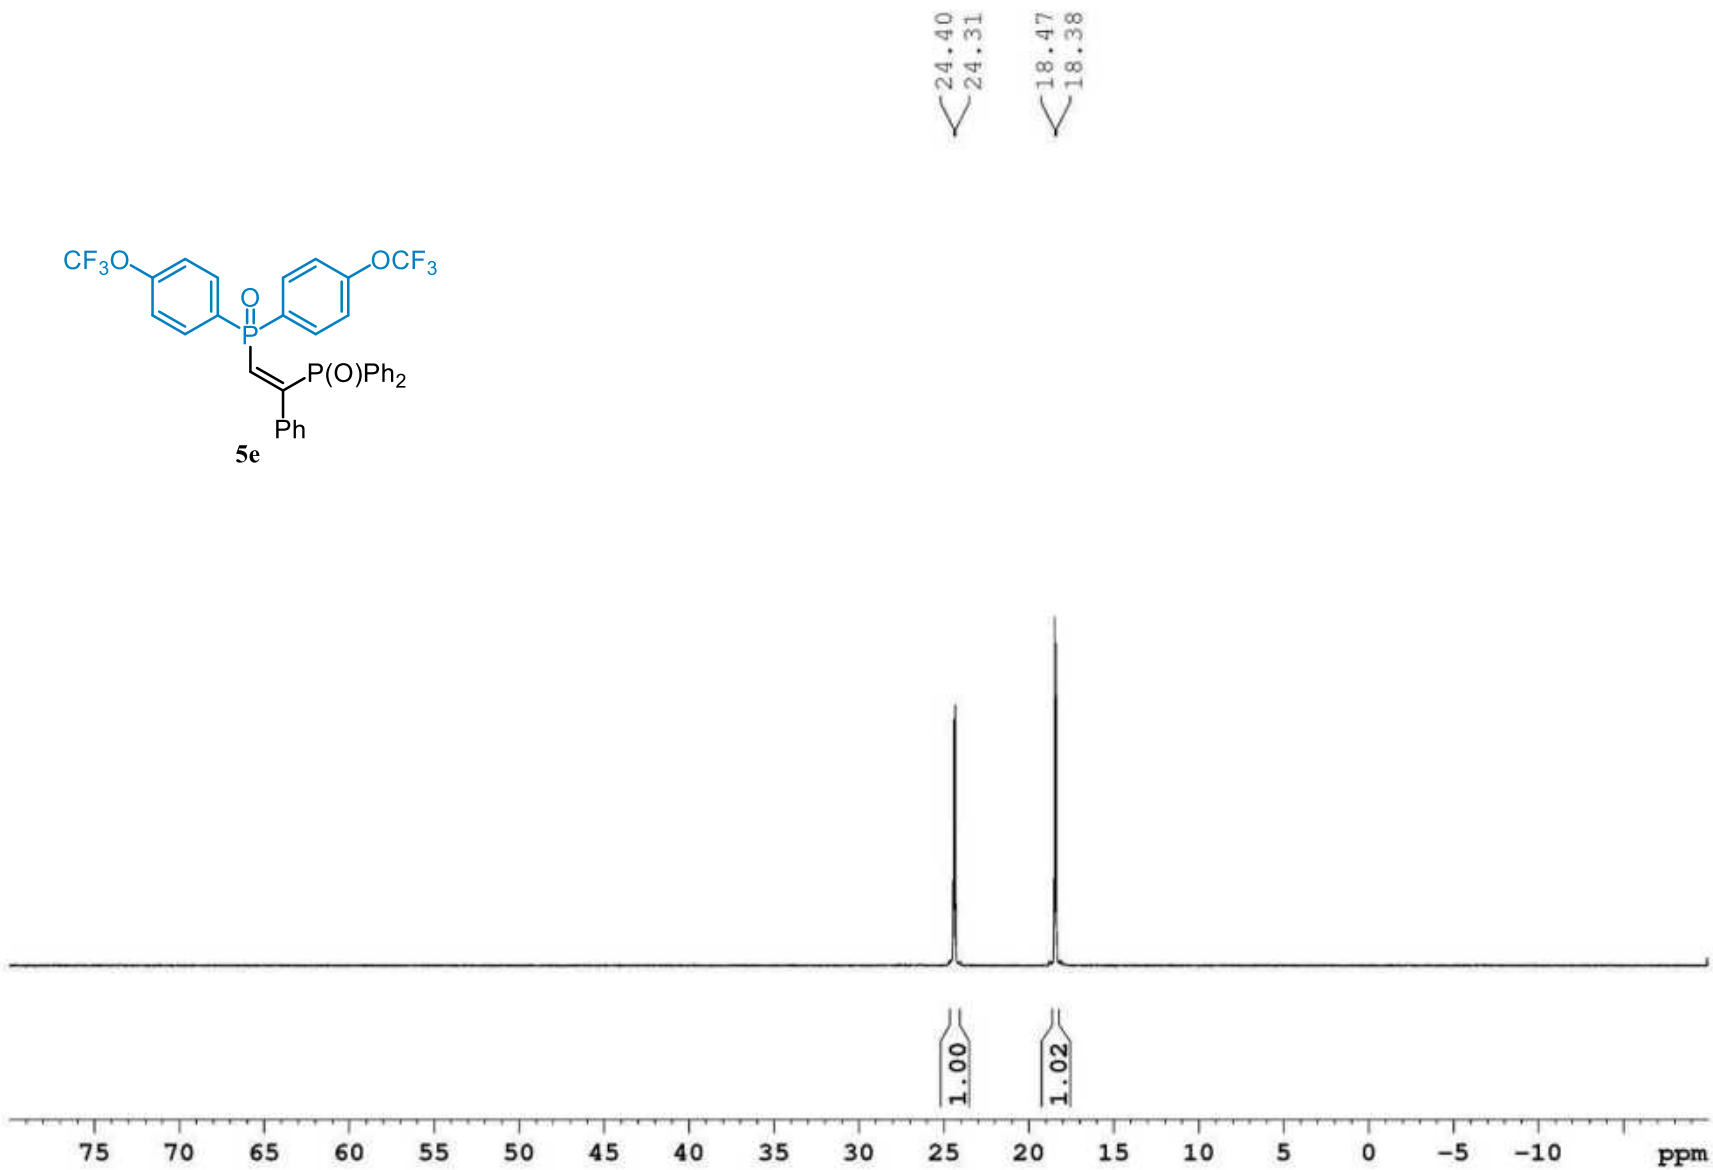

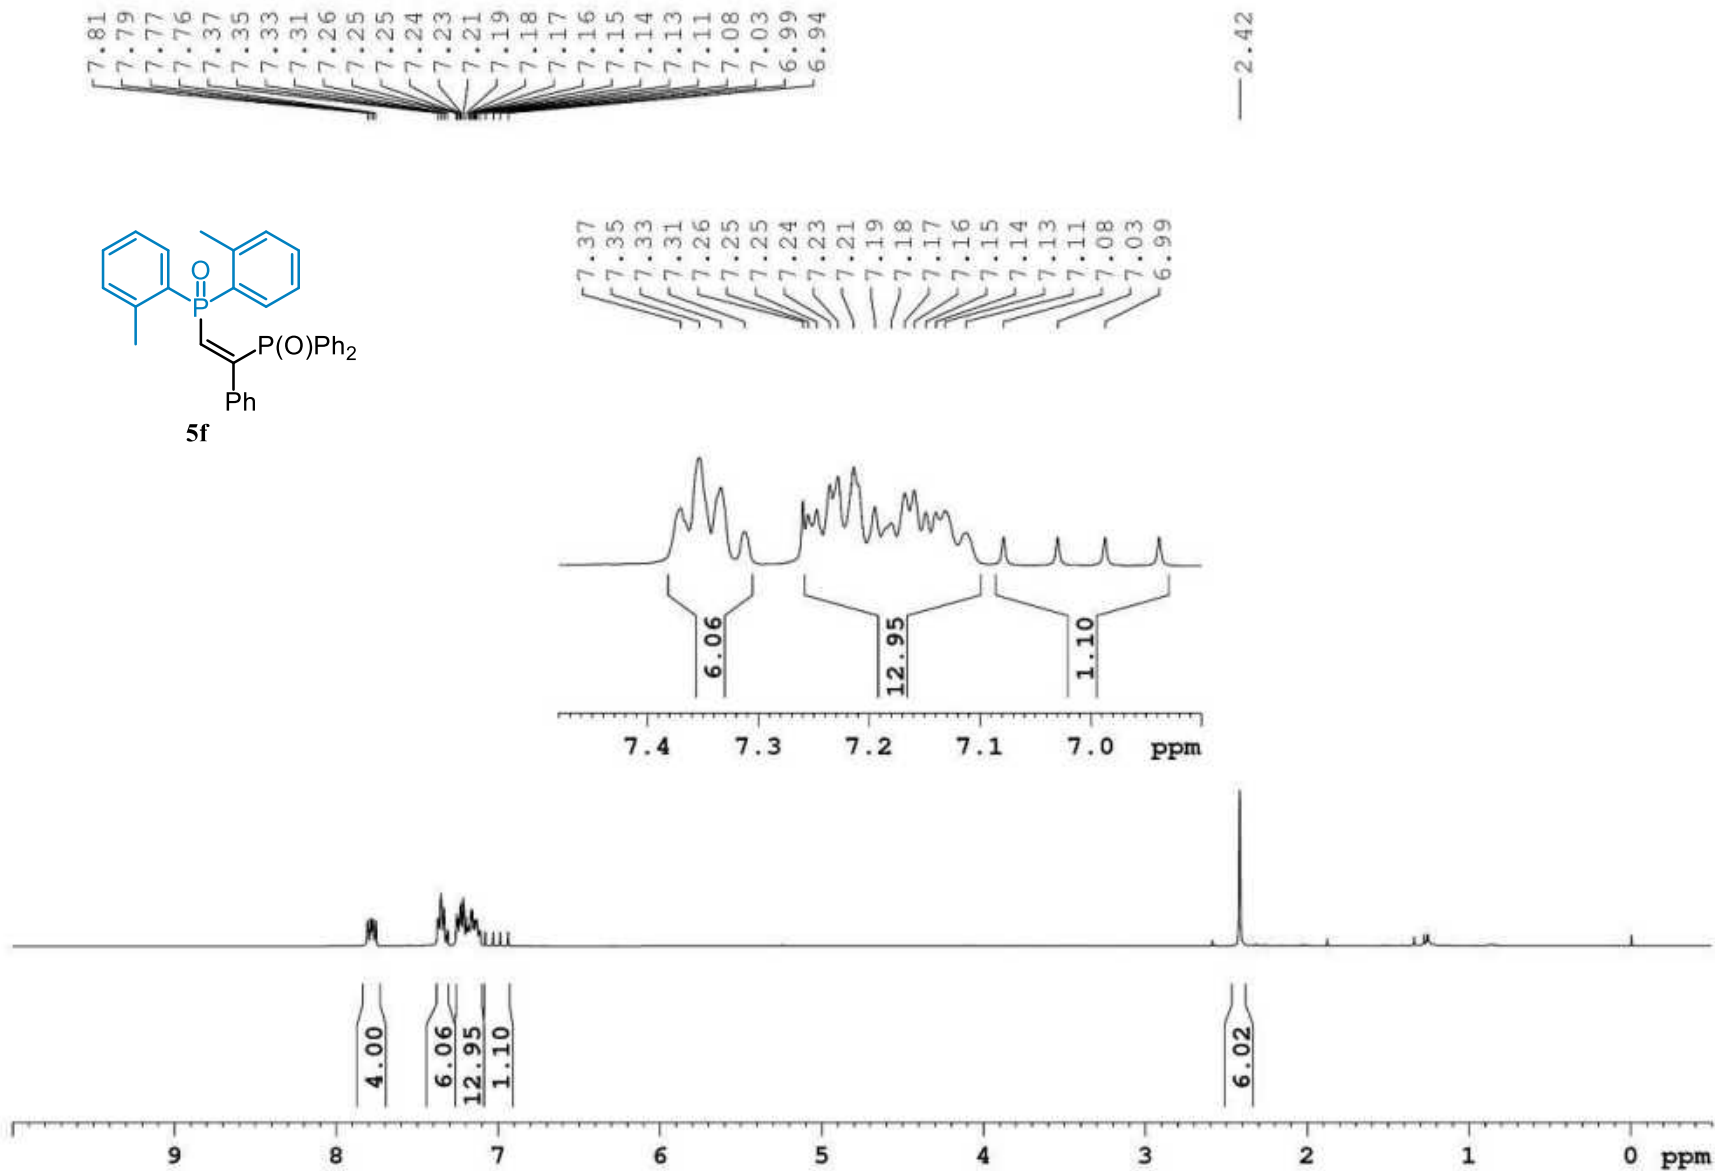

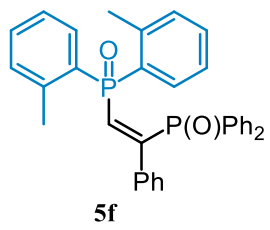

157.56  
156.73  
141.87  
141.79  
141.74  
141.65  
141.05  
140.96  
140.89  
140.83  
140.79  
140.75  
132.78  
132.68  
132.61  
132.49  
132.02  
131.80  
131.77  
131.73  
131.62  
130.98  
130.71  
128.35  
128.23  
128.20  
127.89  
127.76  
125.52  
125.39

21.92  
21.88

141.87  
141.79  
141.74  
141.65

141.05  
140.96  
140.89  
140.83  
140.79  
140.75

132.78  
132.68  
132.61  
132.49

132.02  
131.80  
131.77  
131.73  
131.62

130.98  
130.71

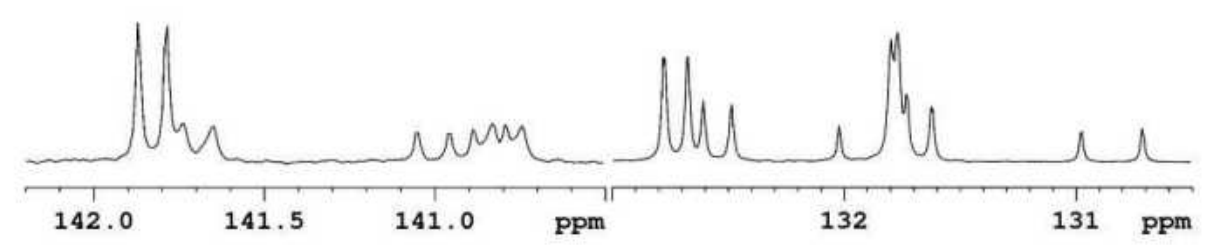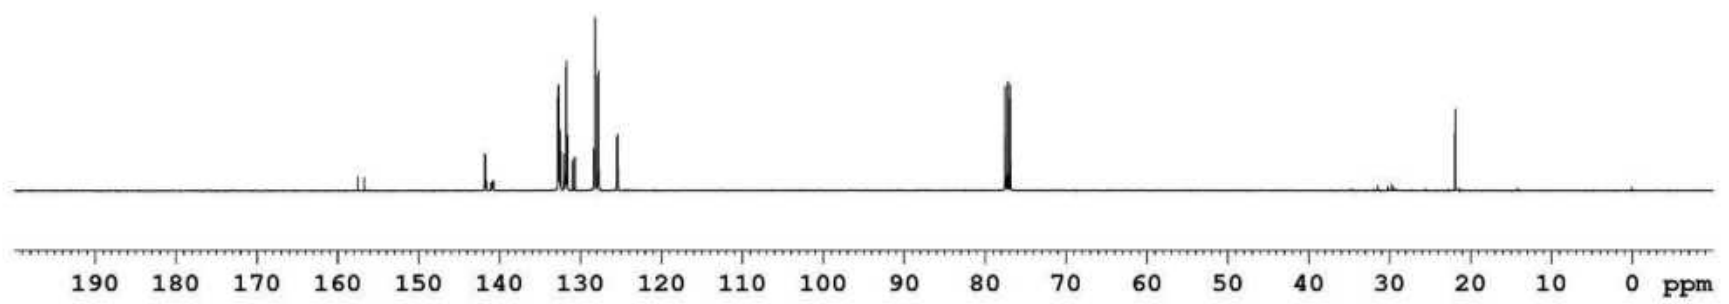



26.04  
25.95  
23.70  
23.61

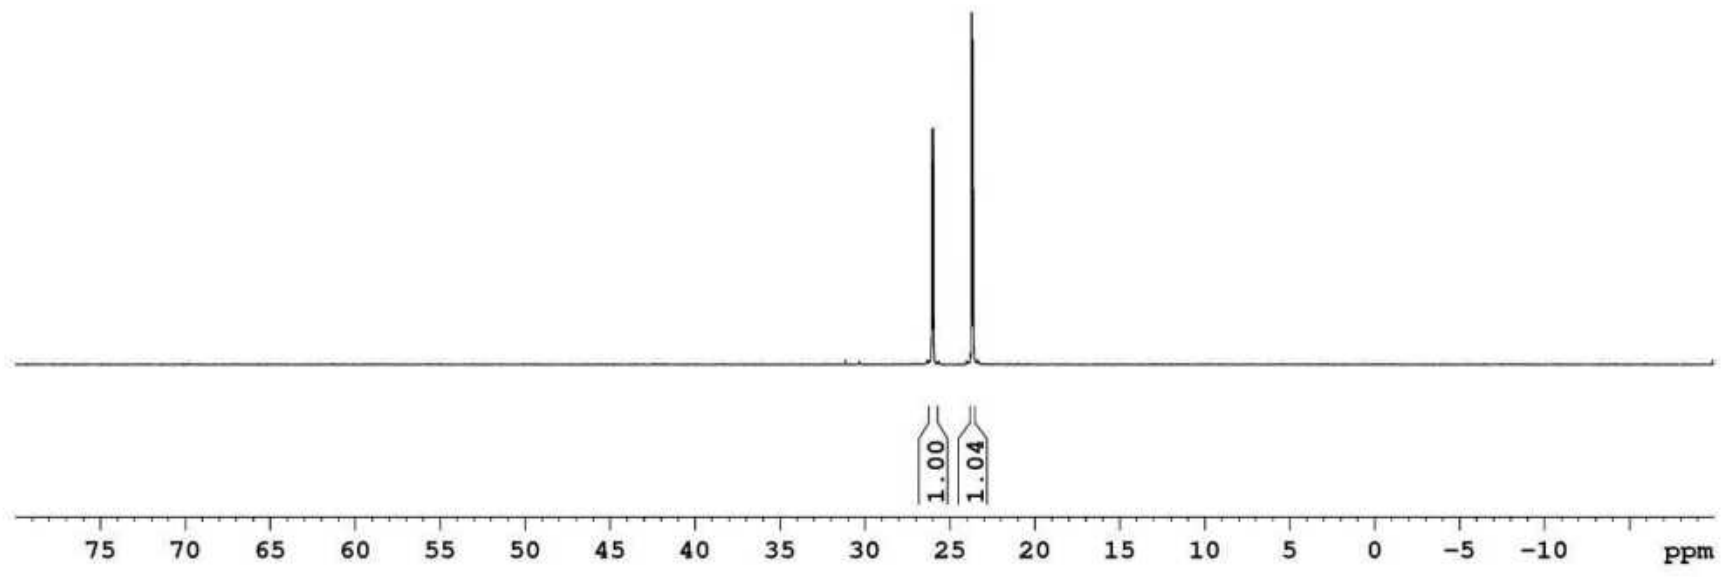

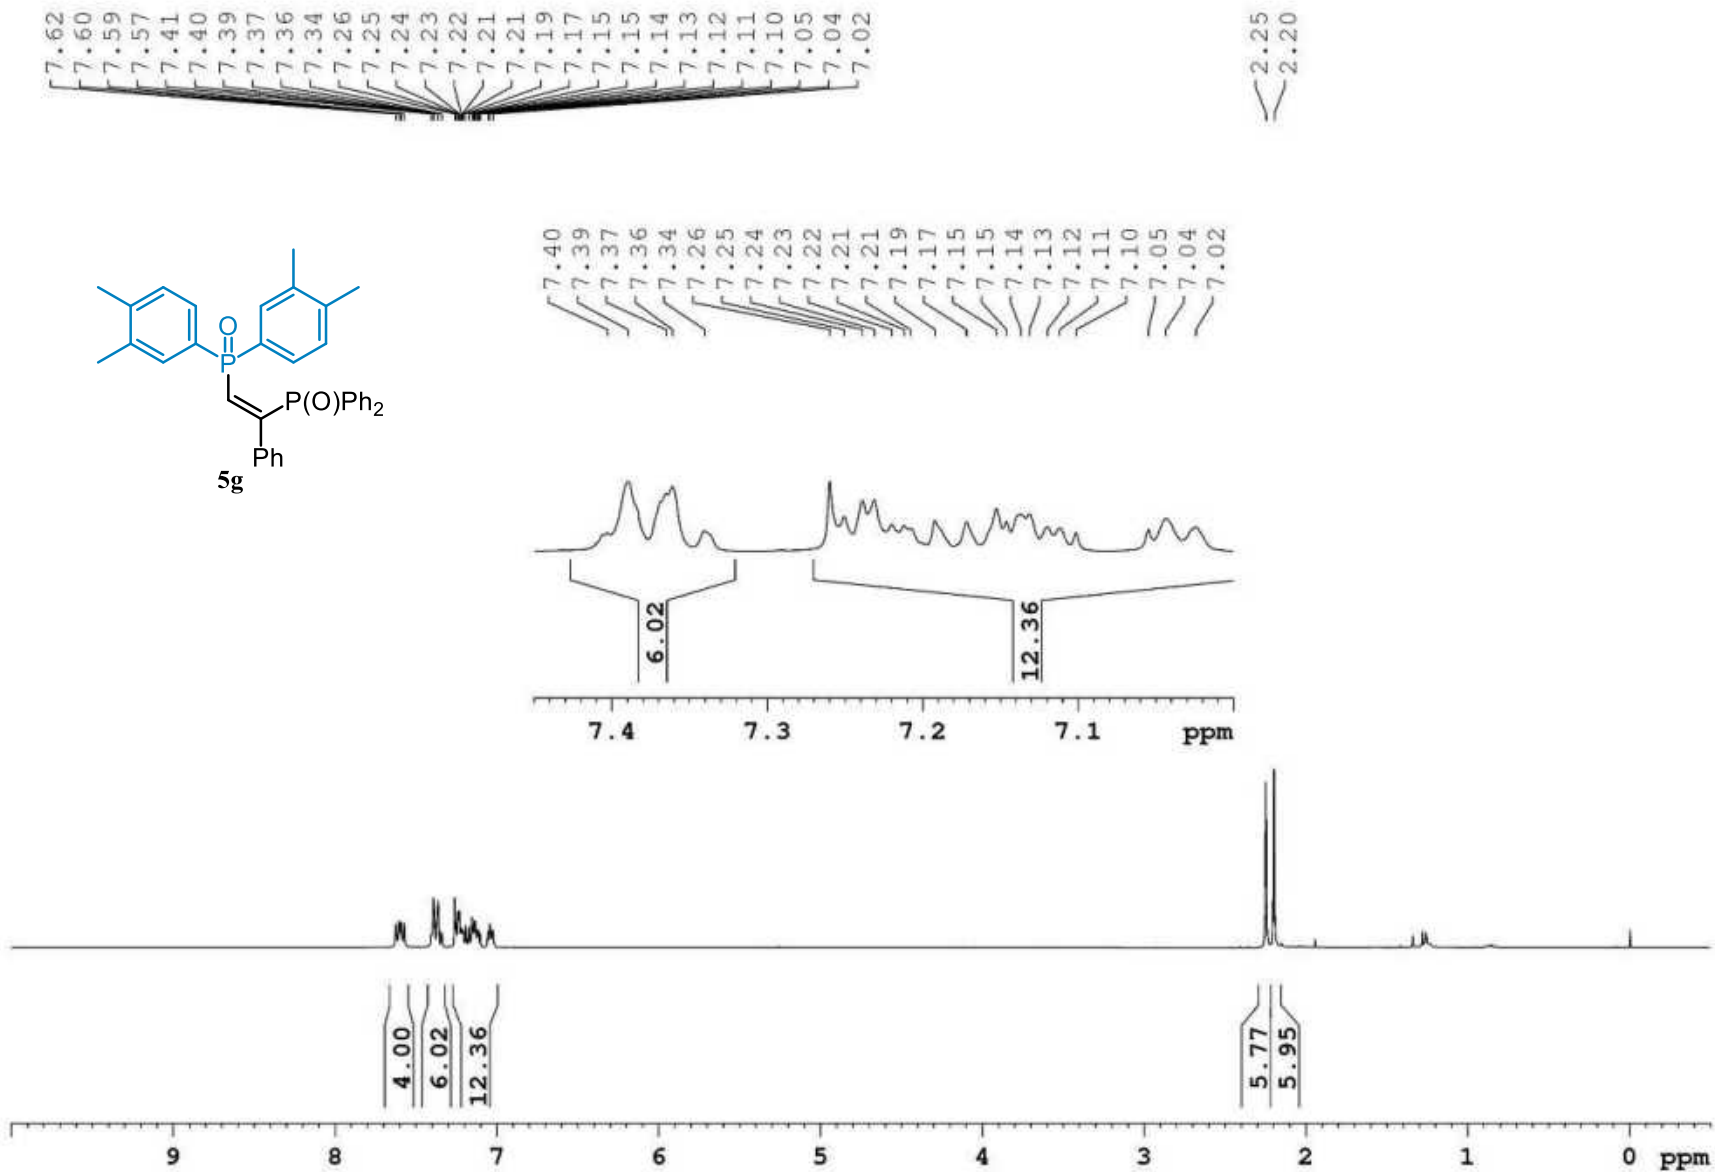

156.38  
155.54  
142.44  
142.36  
141.53  
141.45  
140.69  
140.66  
140.60  
140.54  
140.44  
136.98  
136.85  
132.35  
132.25  
131.96  
131.85  
131.75  
131.72  
131.69  
131.65  
130.91  
130.56  
129.76  
129.63  
128.46  
128.39  
128.36  
128.14  
128.04  
127.91

19.94  
19.81

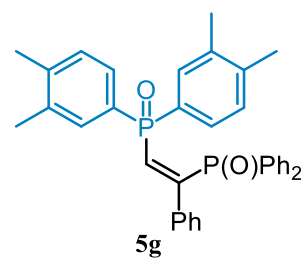

132.35  
132.25  
131.96  
131.85  
131.75  
131.72  
131.69  
131.65  
130.91  
130.56  
128.46  
128.39  
128.36  
128.14  
128.04  
127.91

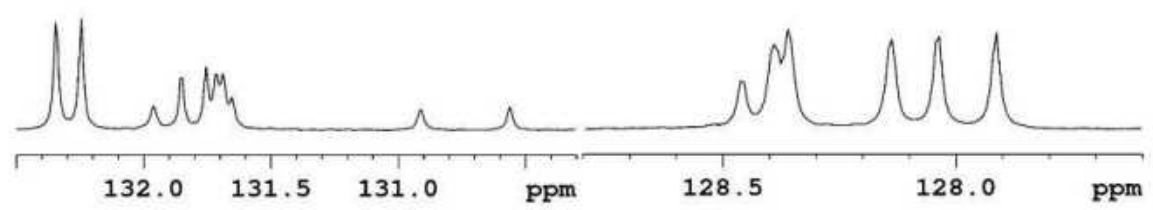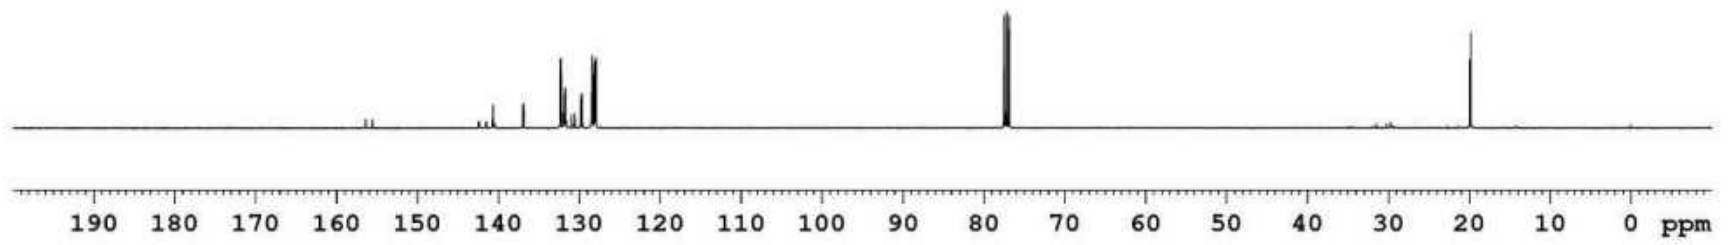

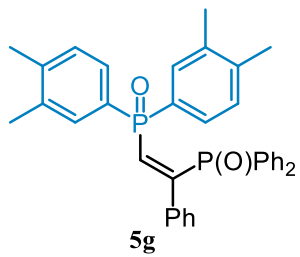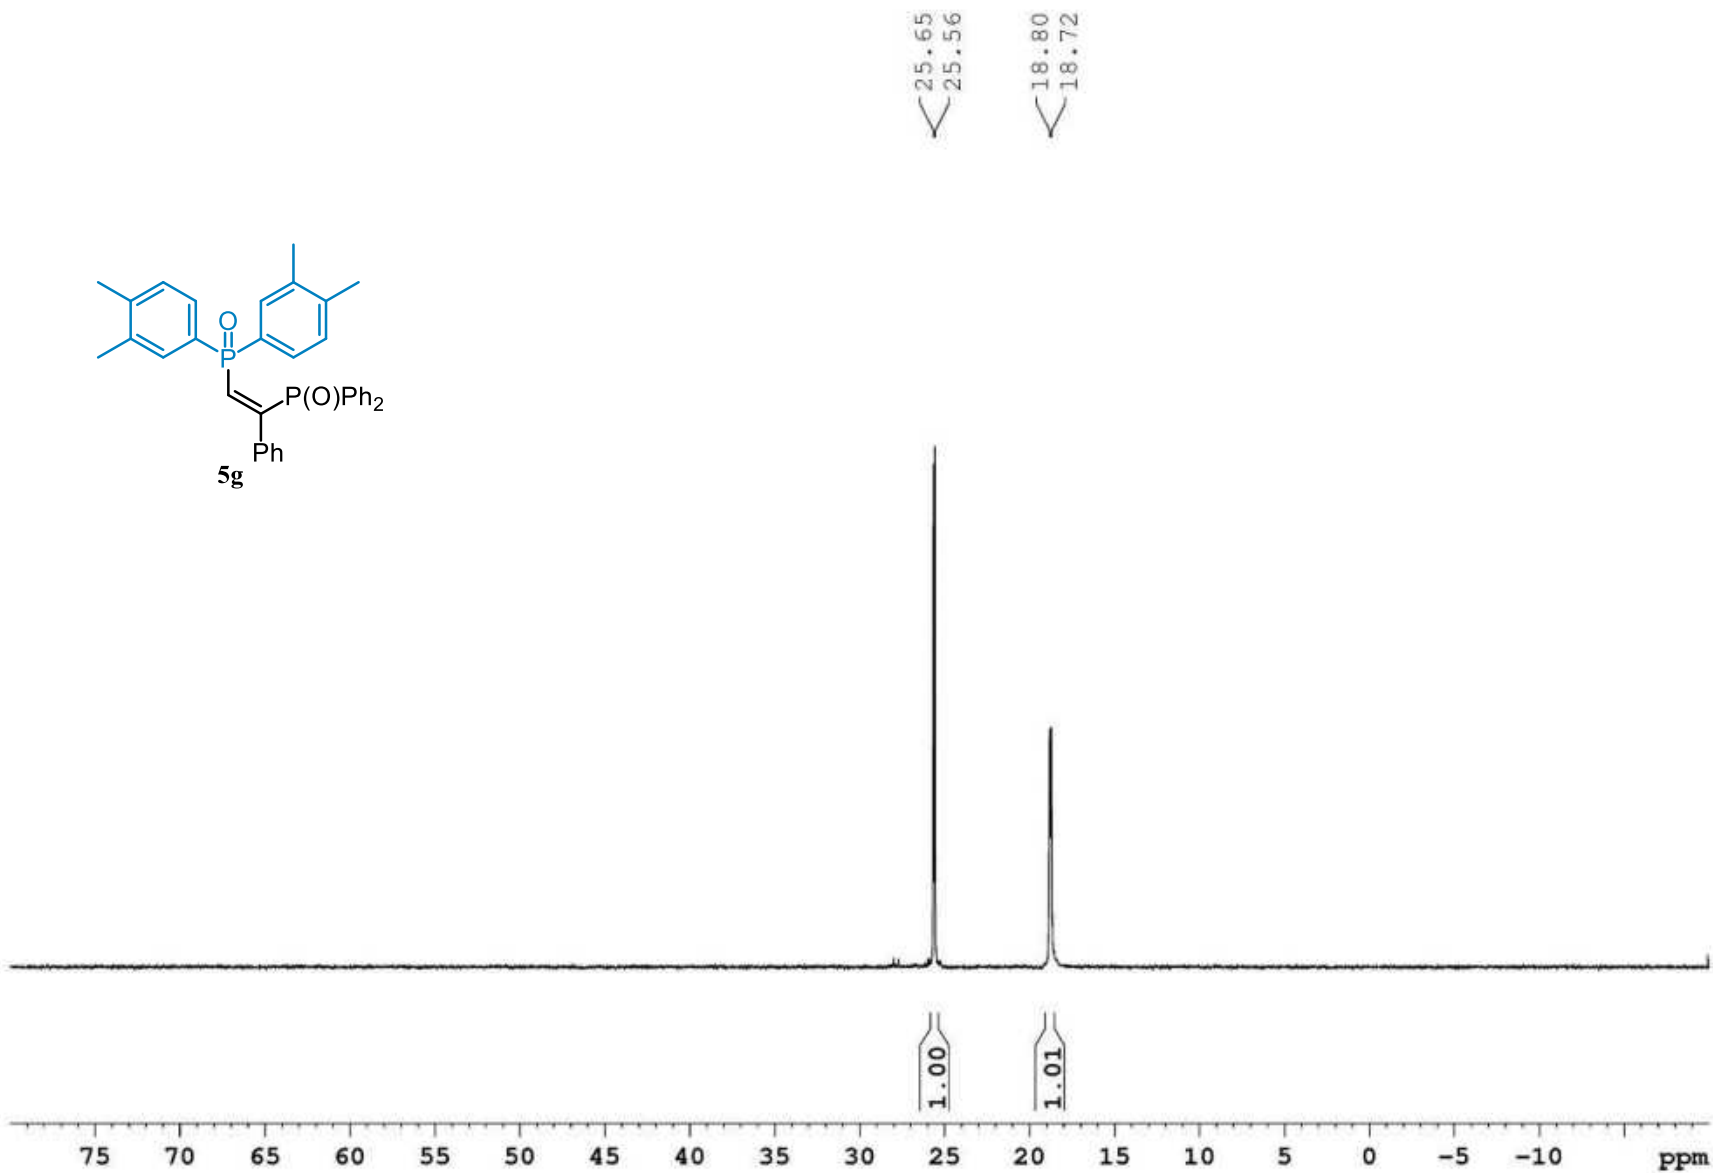

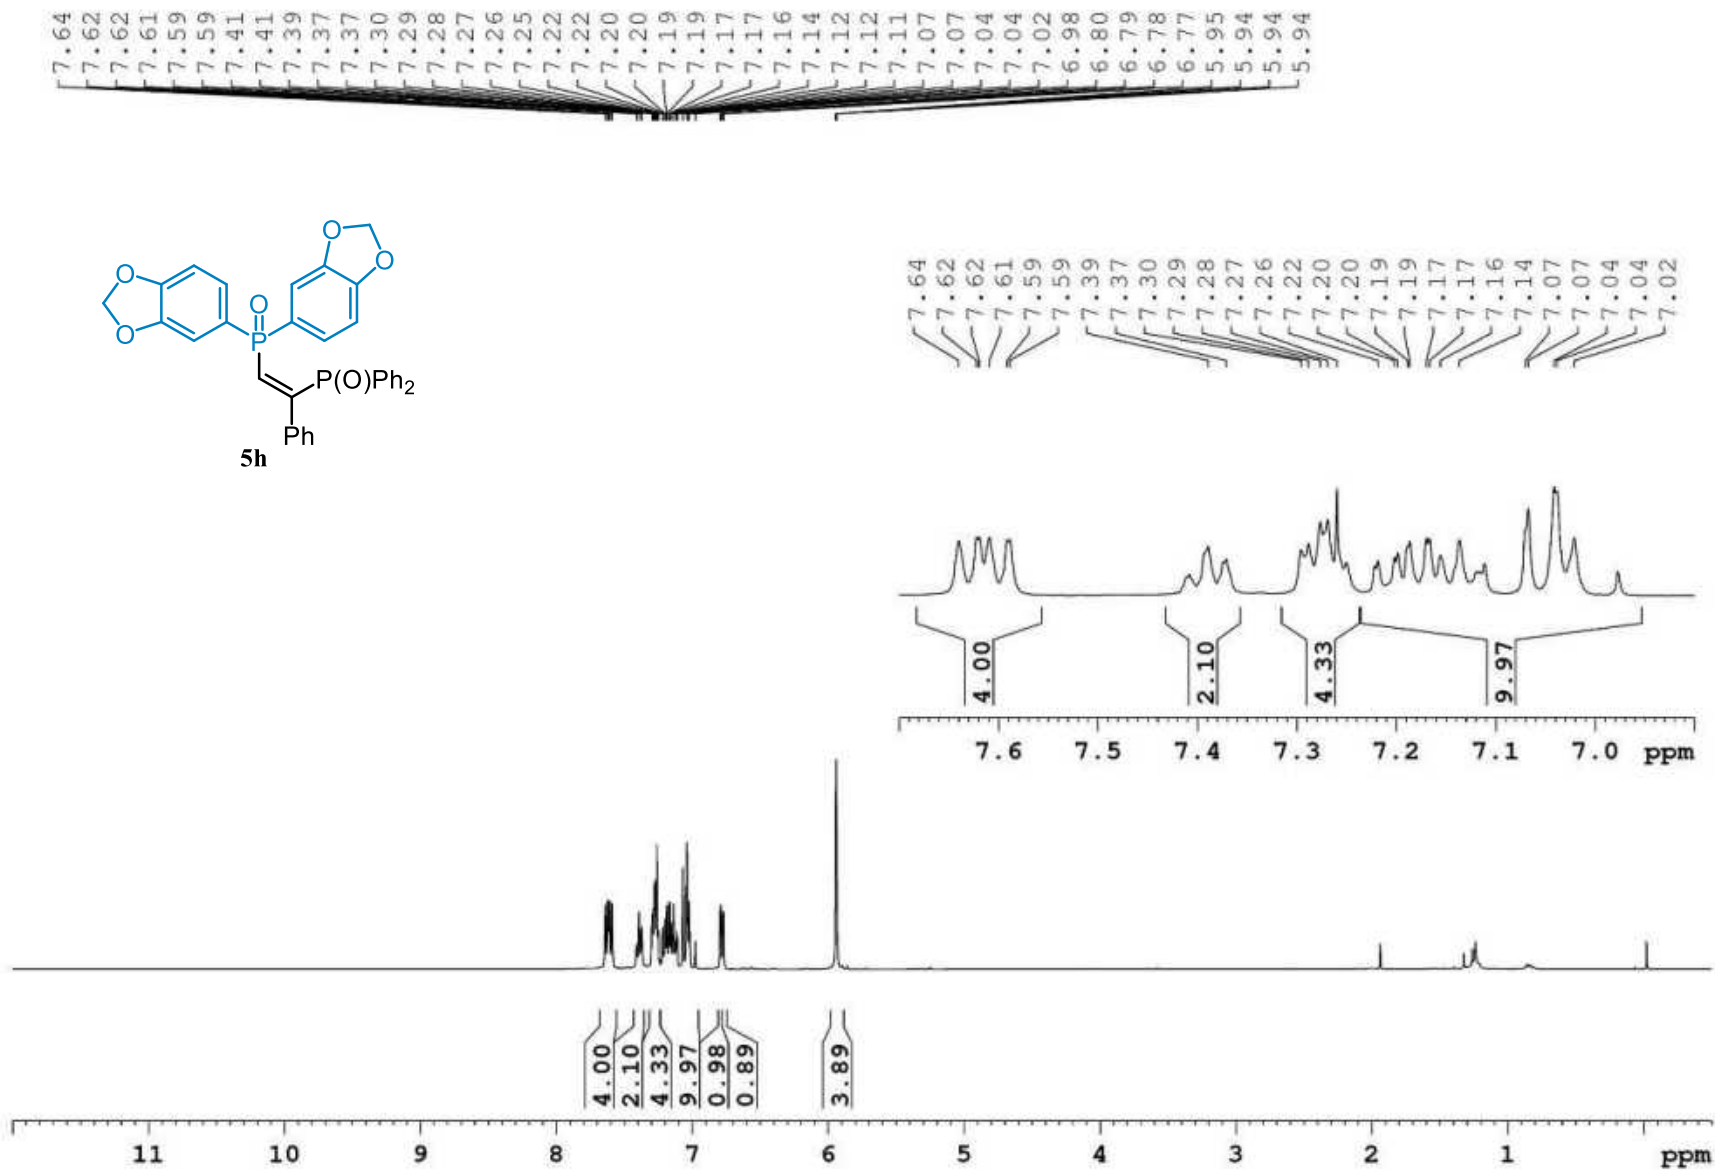



156.70  
155.87  
150.48  
150.46  
147.83  
147.65  
142.00  
141.92  
141.07  
140.98  
140.70  
140.60  
140.53  
140.43  
132.38  
132.29  
132.15  
131.77  
131.75  
131.10  
128.37  
128.34  
128.31  
128.11  
128.04  
127.91  
127.69  
126.57  
126.44  
126.33  
110.75  
110.62  
108.60  
108.44  
101.51

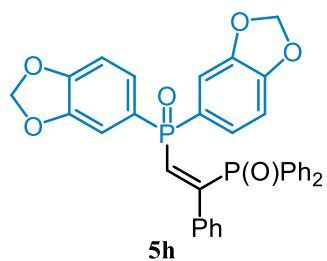

— 132.38  
— 132.29  
— 132.15

— 131.77  
— 131.75

— 131.10

— 128.37  
— 128.34  
— 128.31  
— 128.11  
— 128.04  
— 127.91  
— 127.69

— 126.57  
— 126.44  
— 126.33

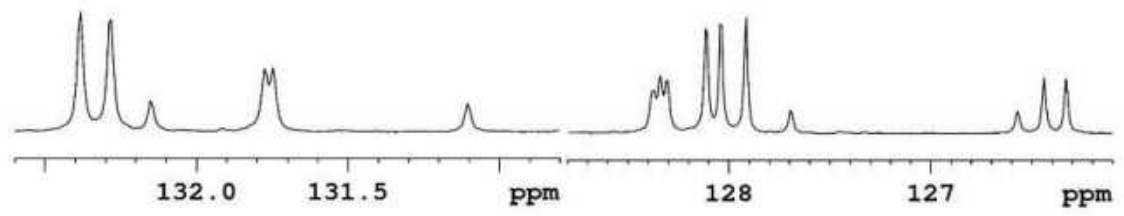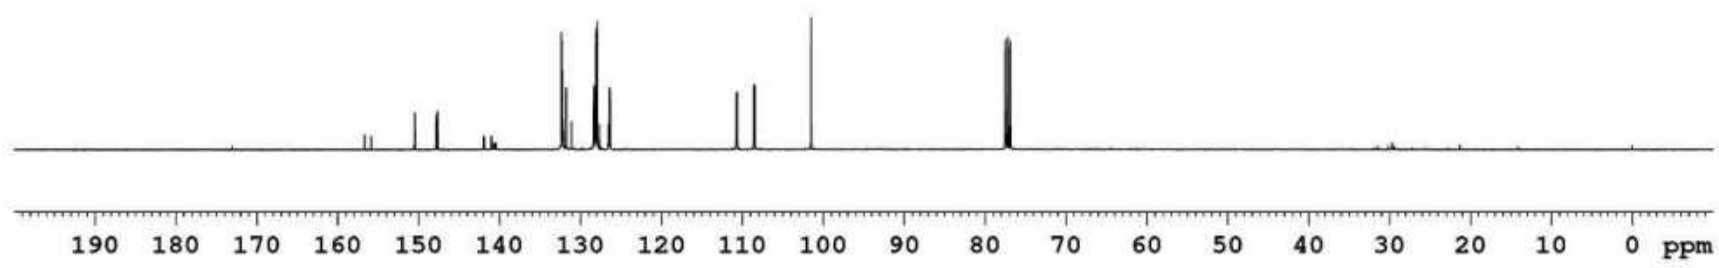

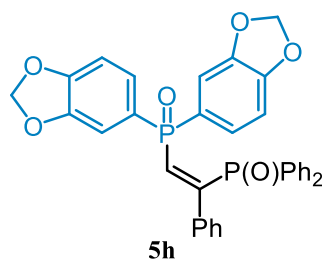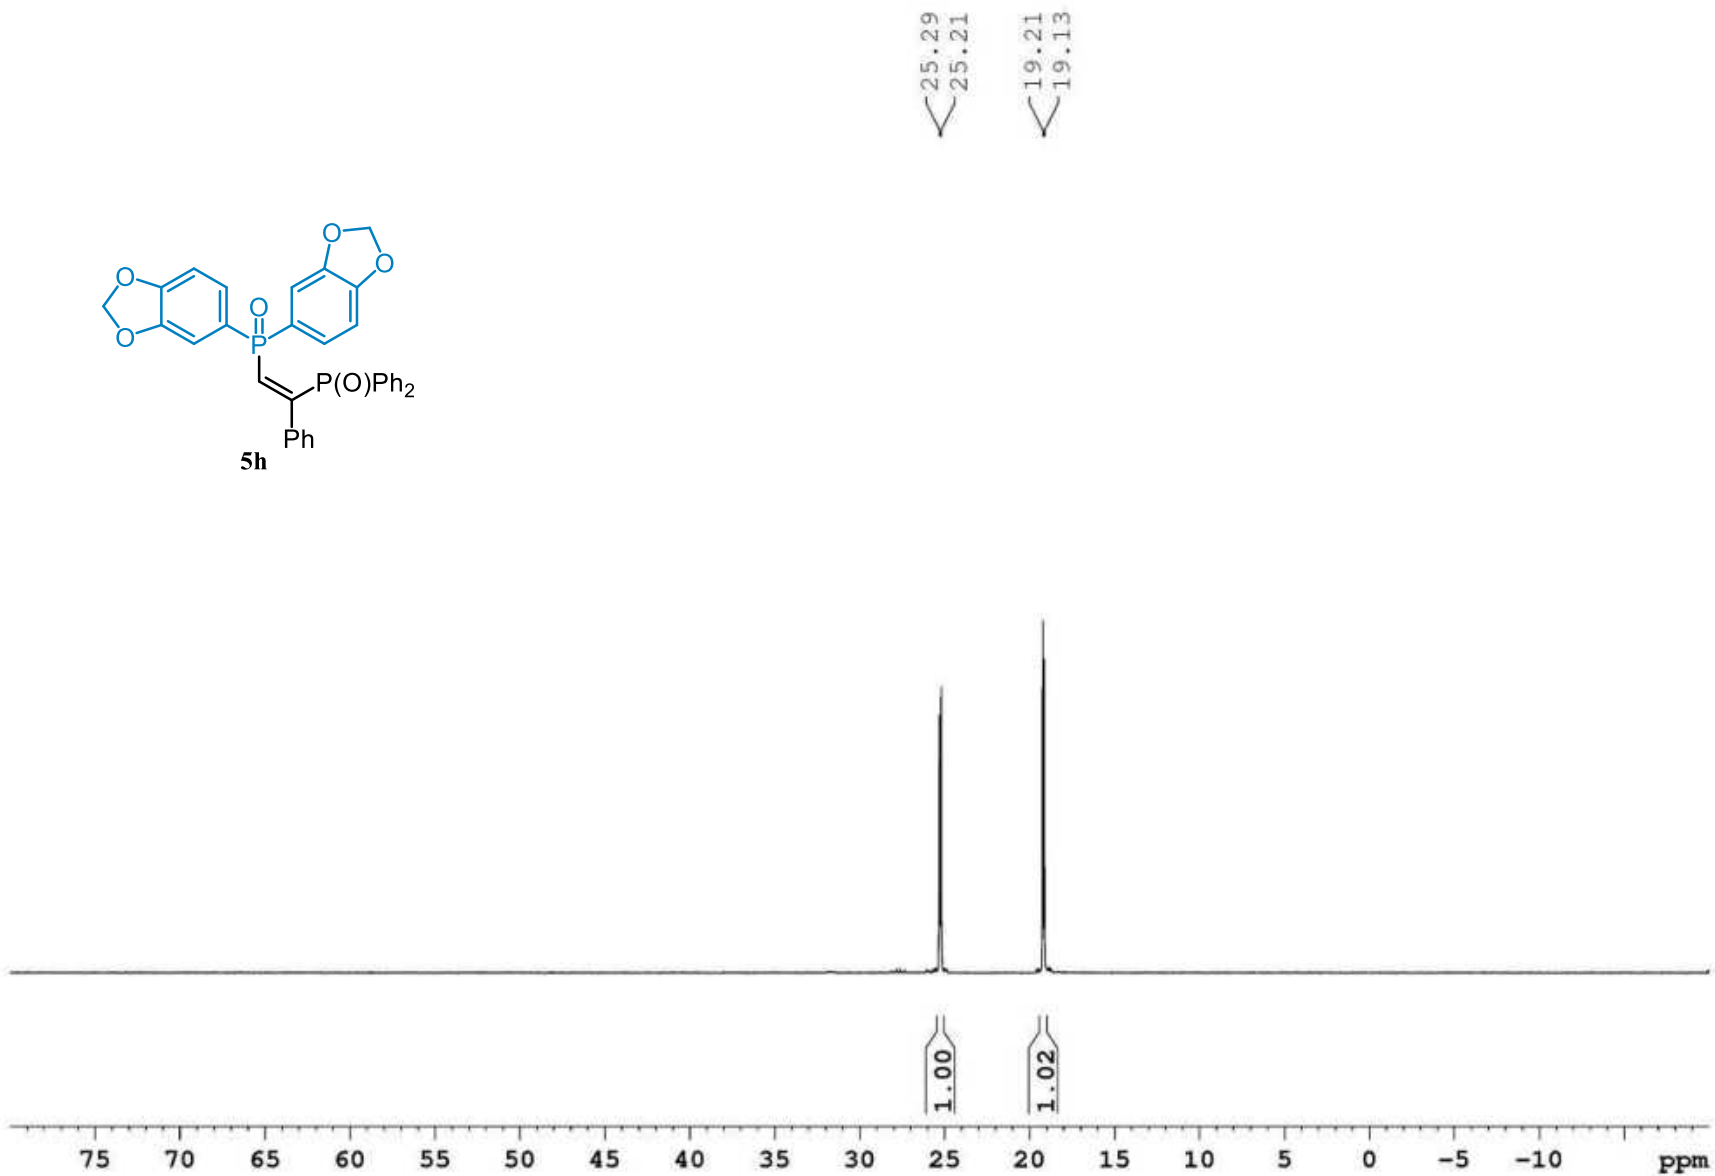

7.52  
7.50  
7.50  
7.49  
7.47  
7.45  
7.43  
7.43  
7.35  
7.34  
7.33  
7.32  
7.31  
7.30  
7.26  
7.16  
7.14  
7.12  
7.07  
7.05  
7.03  
6.74  
6.72  
6.66  
6.63  
6.56  
6.54

2.48  
2.45  
2.43  
2.40  
1.93  
1.91  
1.83  
1.80  
1.75  
1.72  
1.63  
1.61  
1.59  
1.51  
1.48  
1.45  
1.44  
1.42  
1.40  
1.21  
1.19  
1.17  
1.15  
1.13

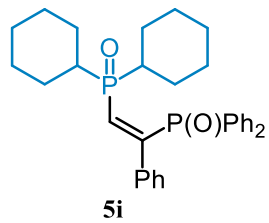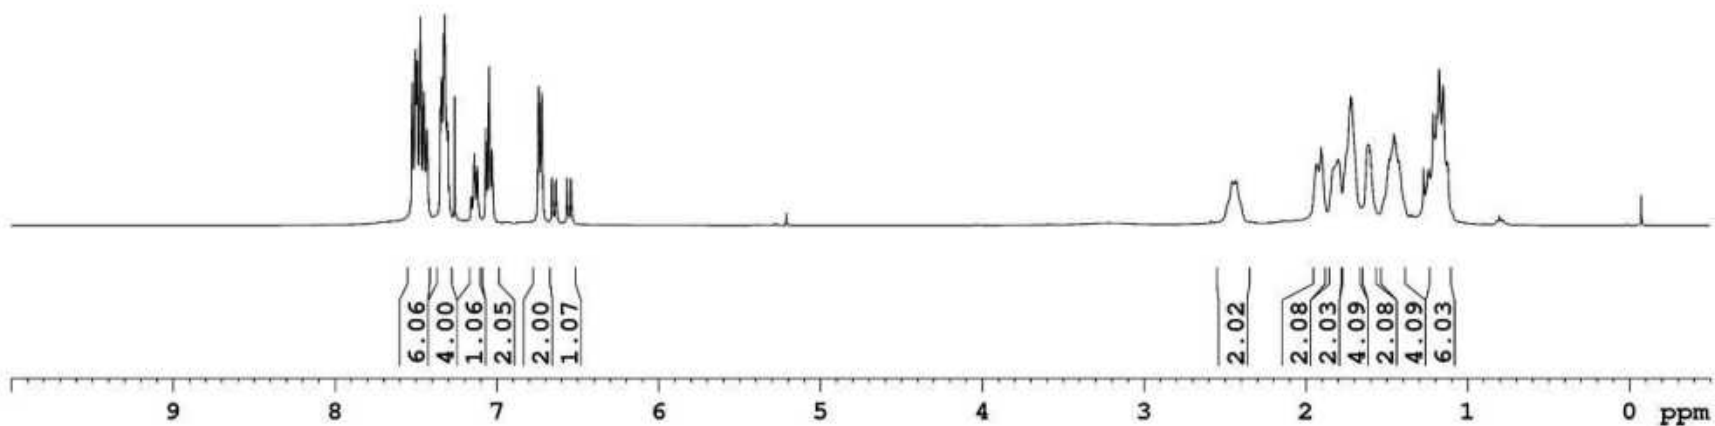

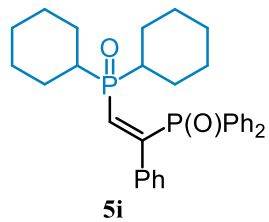

154.31  
 153.47  
 145.84  
 145.16  
 140.15  
 140.03  
 139.90  
 132.30  
 132.27  
 132.01  
 131.92  
 131.74  
 130.70  
 128.53  
 128.48  
 128.35  
 128.14

38.59  
 37.92  
 26.69  
 26.66  
 26.51  
 26.38  
 26.24  
 26.10  
 26.07  
 25.81

154.31  
 153.47

145.84  
 145.16

140.15  
 140.03  
 139.90

132.30  
 132.27  
 132.01  
 131.92  
 131.74  
 130.70  
 128.53  
 128.48  
 128.35  
 128.14

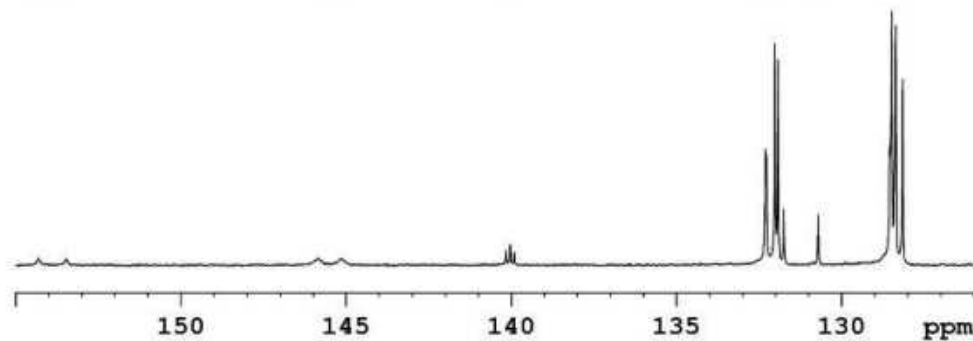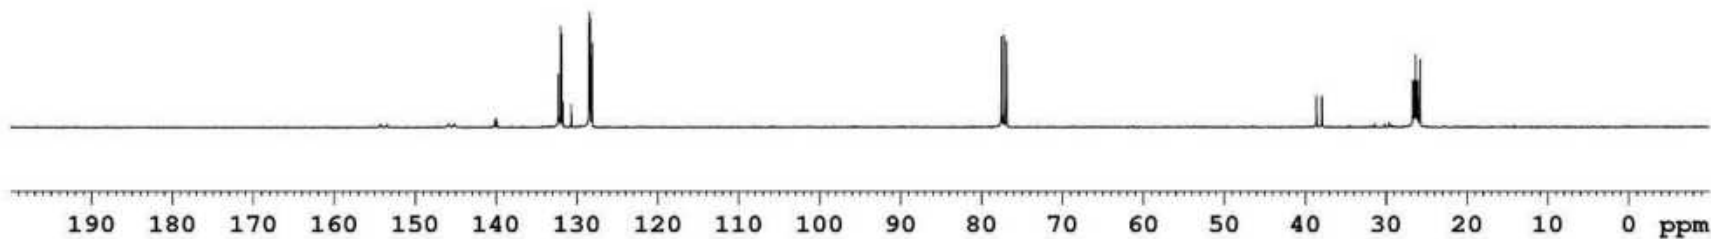

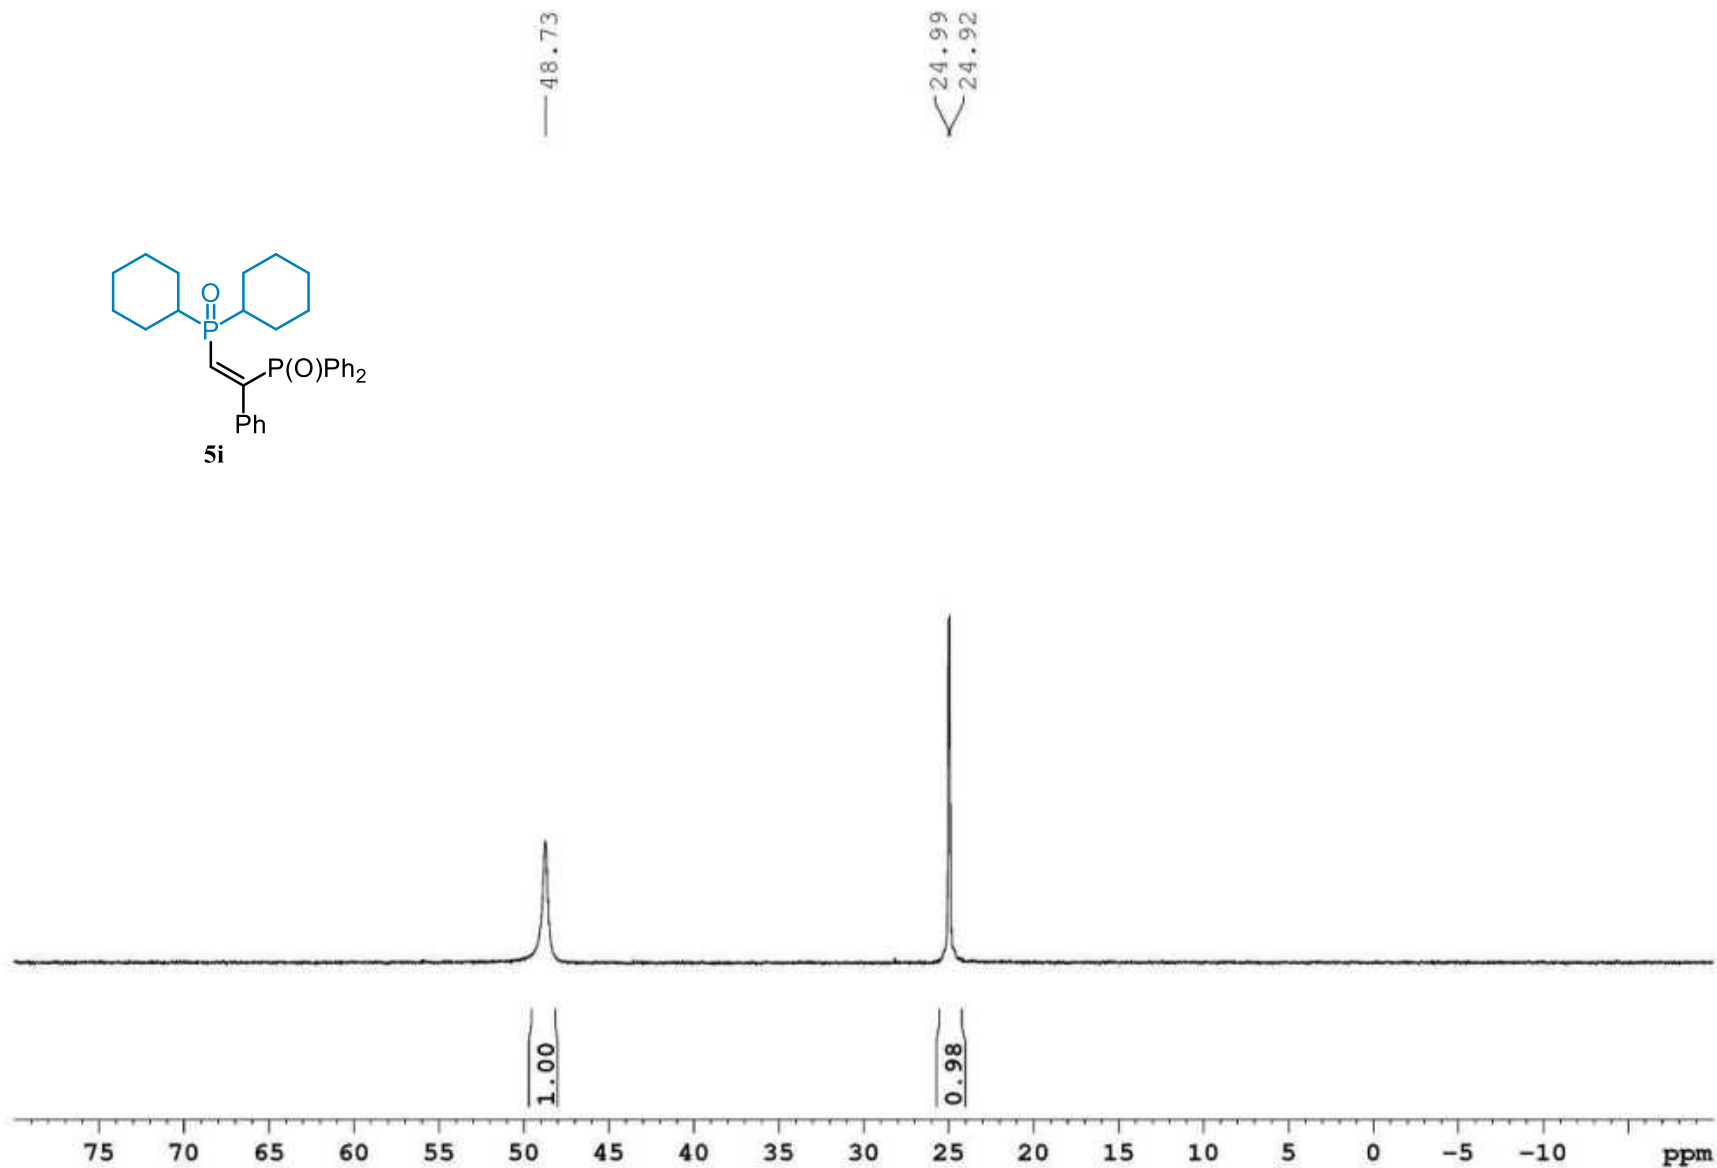

7.53  
7.51  
7.50  
7.49  
7.49  
7.48  
7.38  
7.37  
7.36  
7.34  
7.17  
7.15  
7.13  
7.06  
7.04  
7.02  
6.92  
6.91  
6.90  
6.82  
6.81  
6.80  
6.71  
6.69  
3.13  
3.11  
3.09  
3.08  
1.94  
1.92  
1.90  
1.89  
1.86  
1.84  
1.83  
1.81  
1.79  
1.77  
1.76  
1.75  
1.73  
1.72  
1.70  
1.68  
1.66  
1.64  
1.61  
1.60  
1.59  
1.57  
1.56  
1.55  
1.54  
1.50  
1.48  
1.46  
1.46

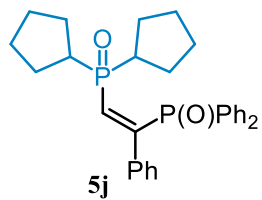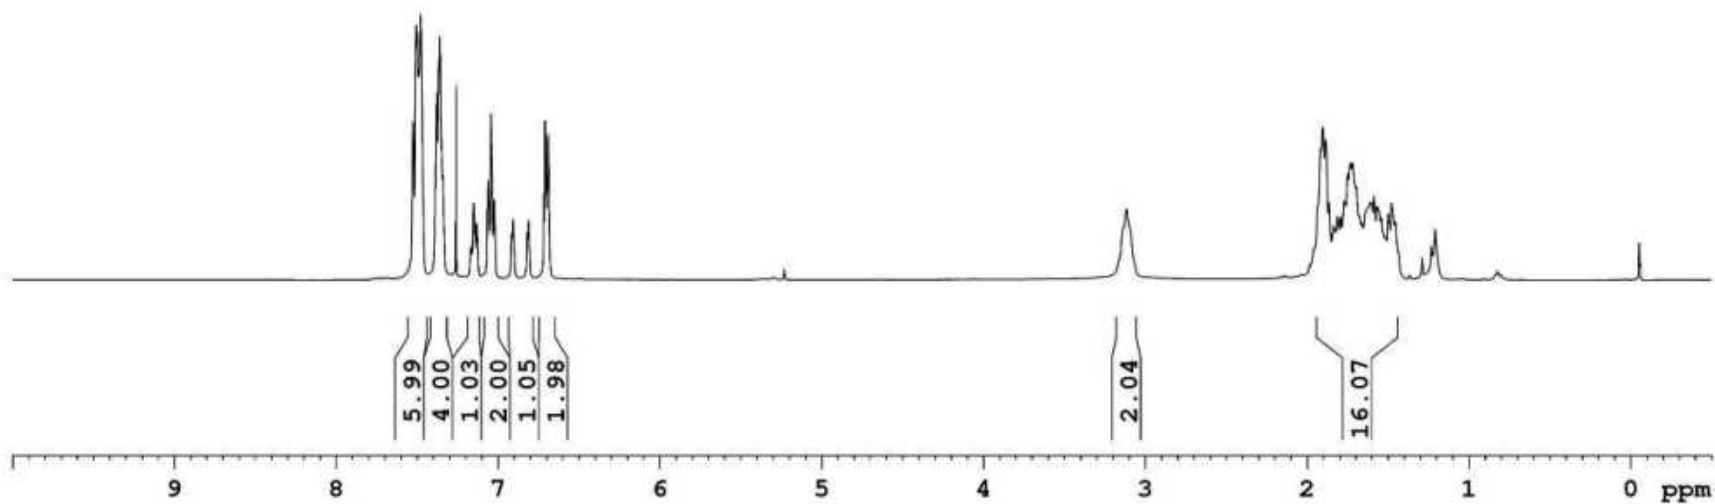



151.49  
150.63  
149.62  
148.89  
139.98  
139.85  
139.72  
132.37  
132.34  
132.04  
131.95  
131.55  
130.51  
128.96  
128.93  
128.54  
128.42  
128.33  
128.05

39.22  
38.52  
27.84  
27.82  
26.80  
26.70  
26.56  
26.13  
26.03

151.49  
150.63  
149.62  
148.89

139.98  
139.85  
139.72

132.37  
132.34  
132.04  
131.95  
131.55  
130.51  
128.96  
128.93  
128.54  
128.42  
128.33  
128.05

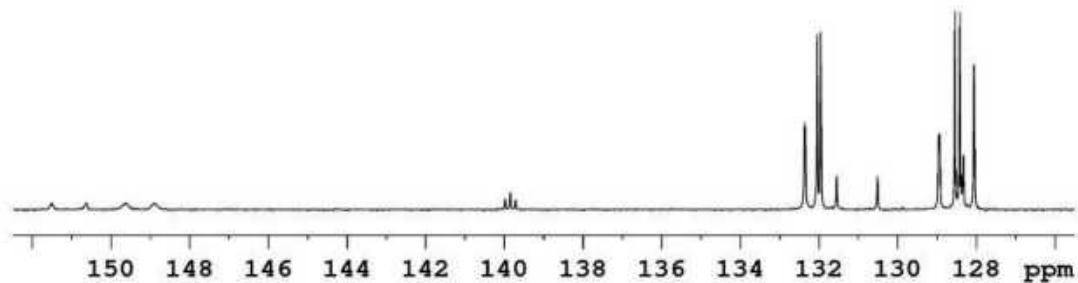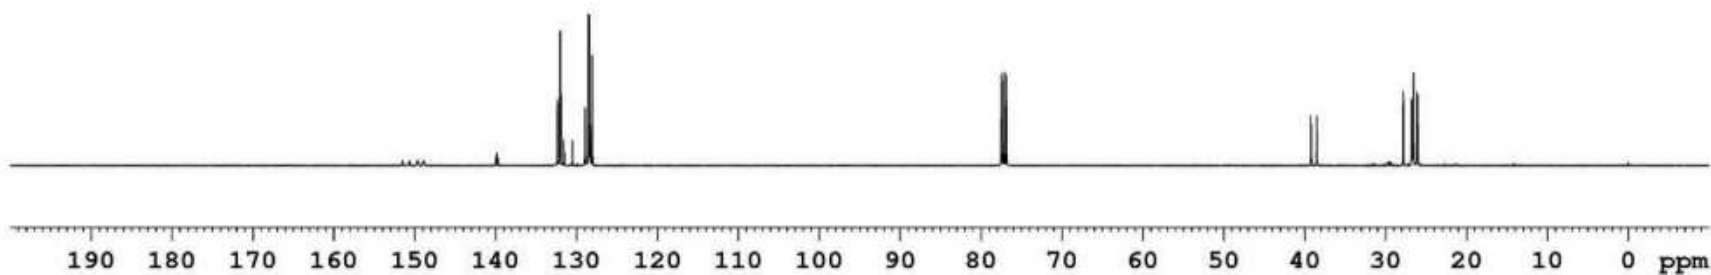

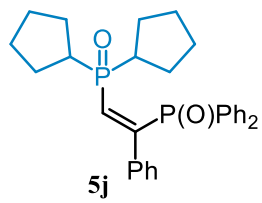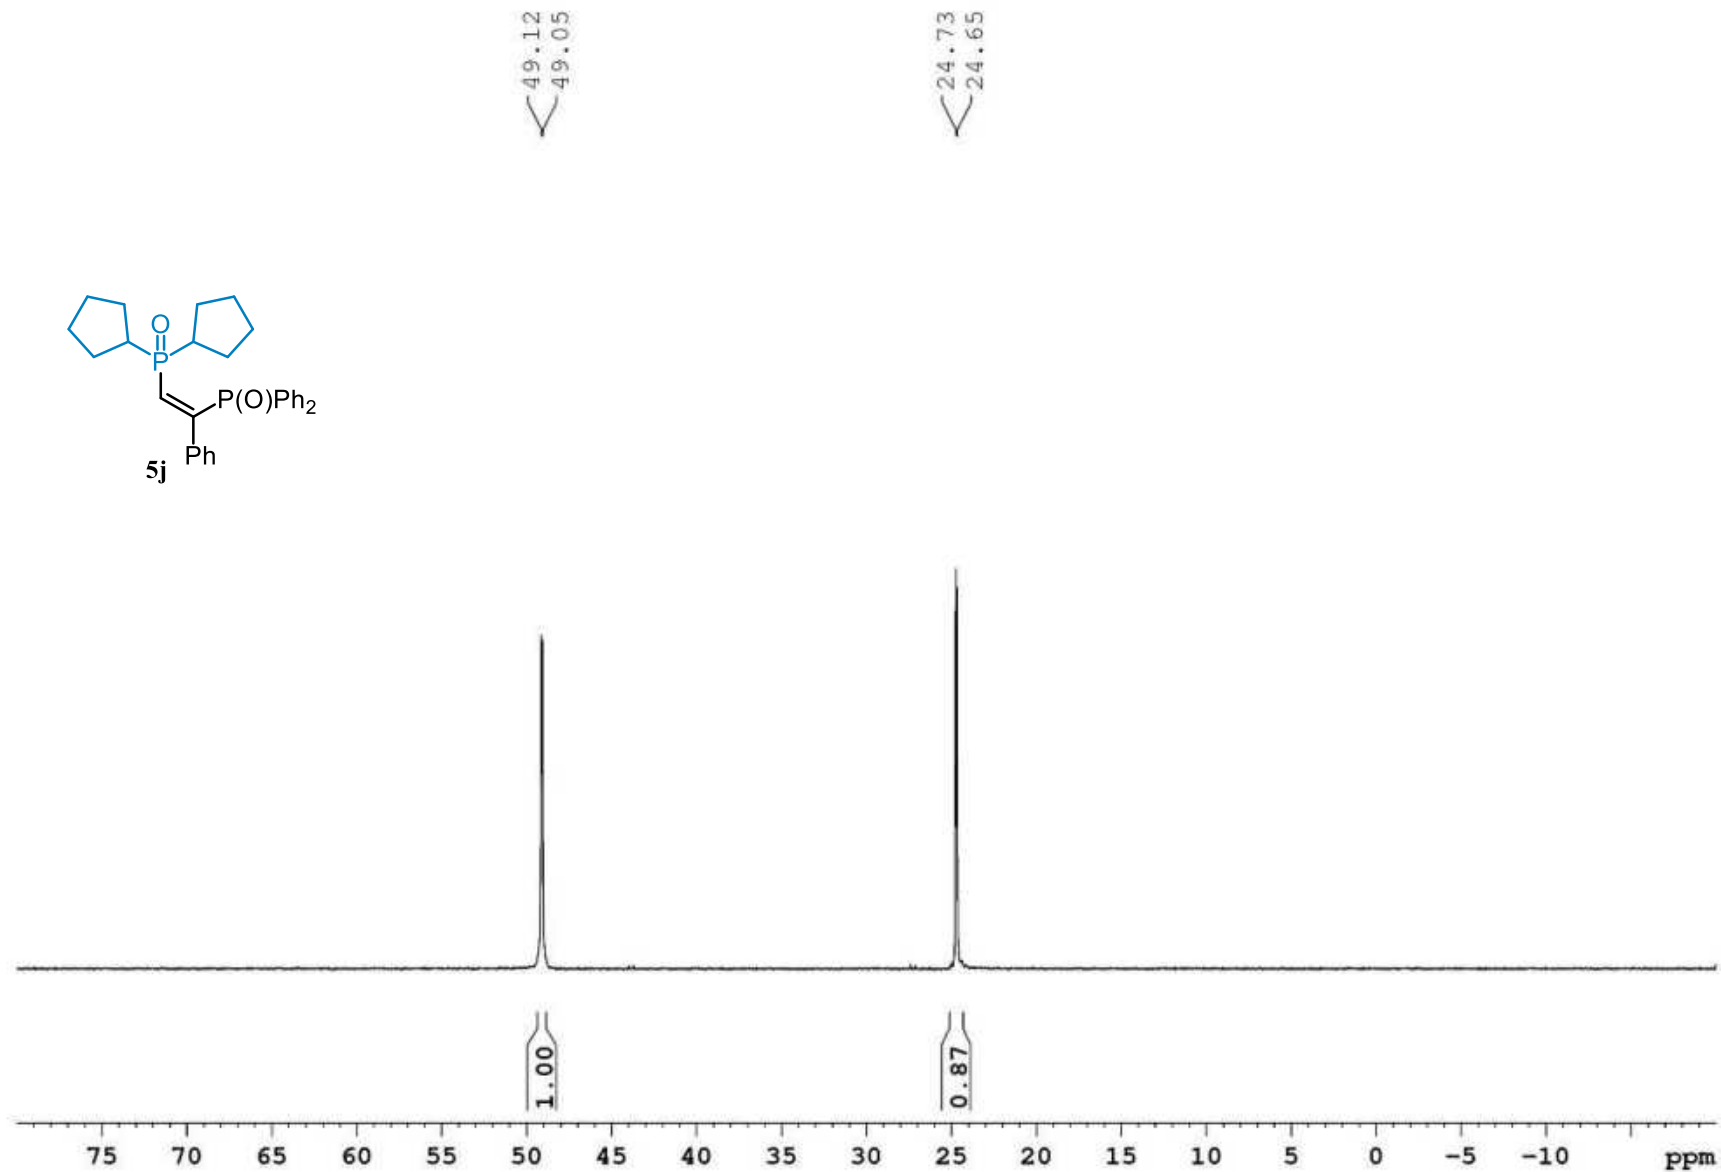



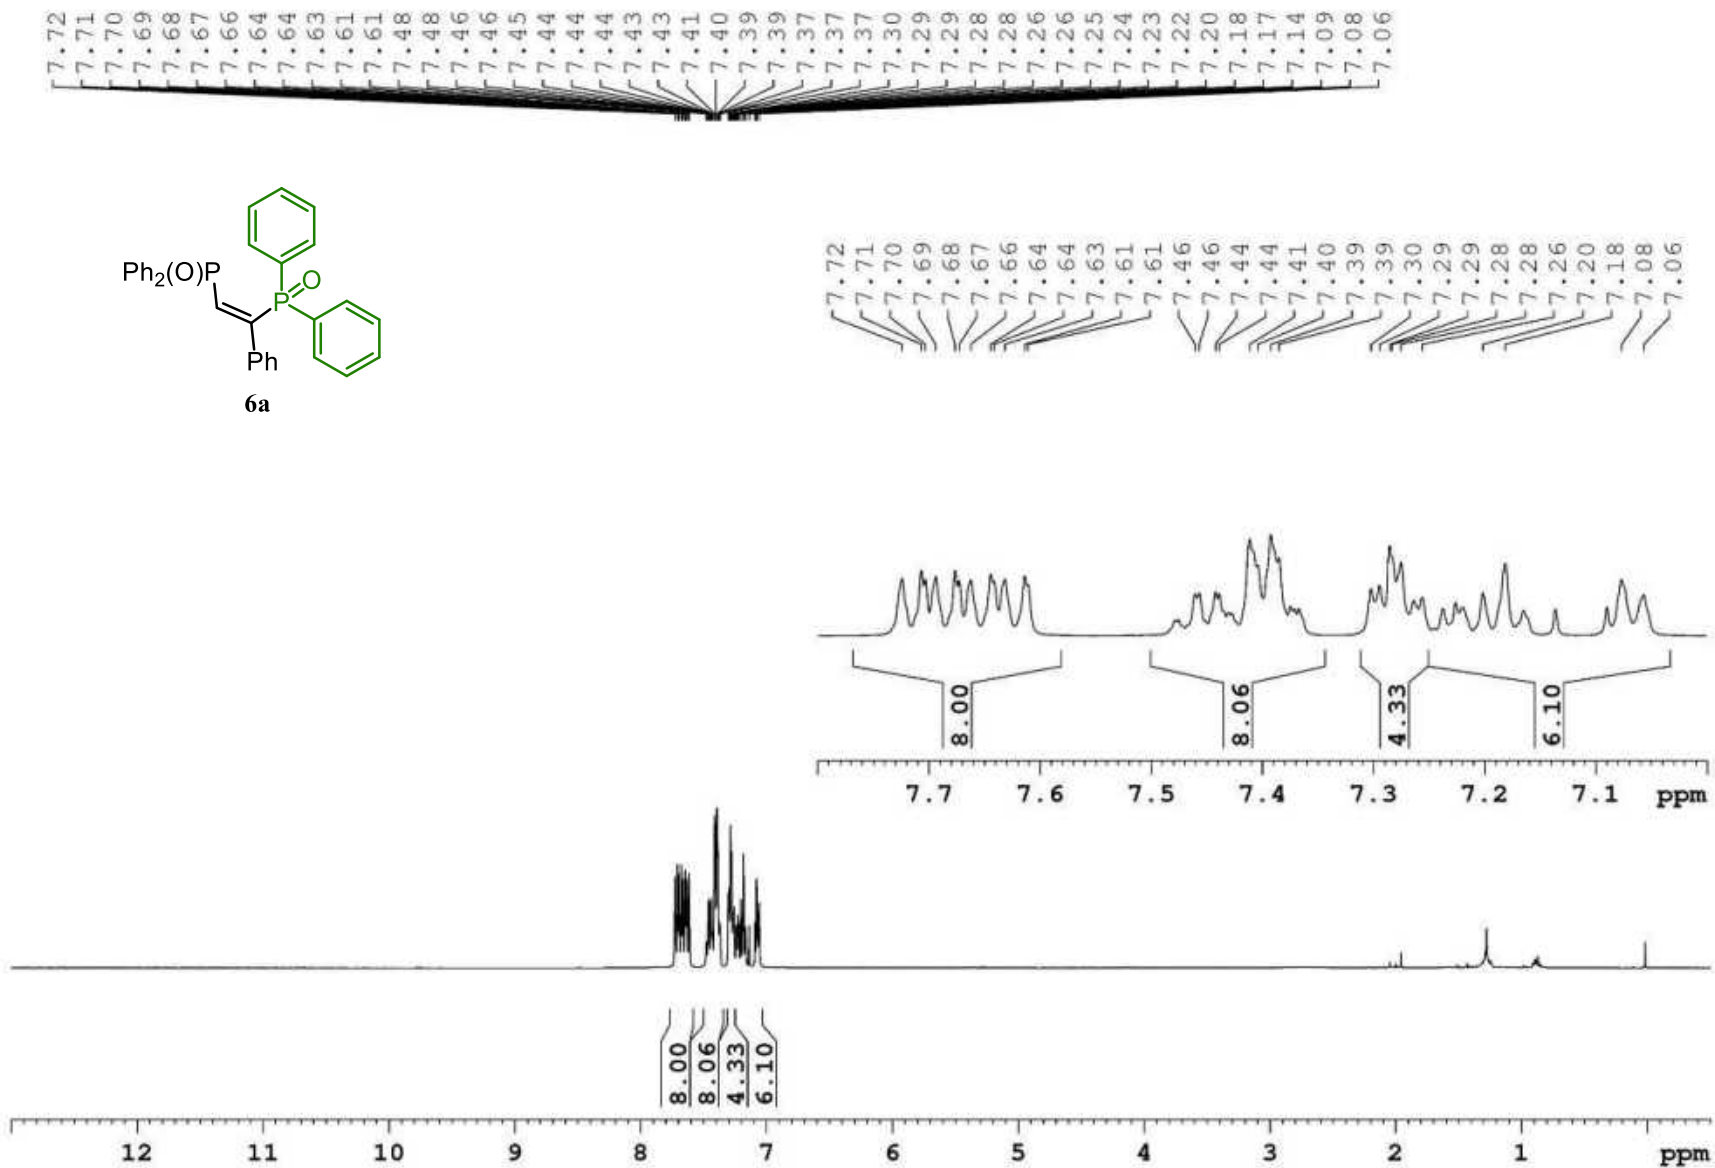

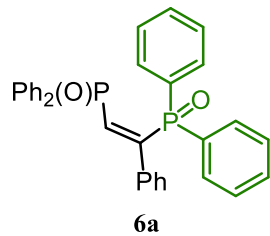

157.49  
 156.65  
 141.63  
 141.55  
 140.71  
 140.63  
 140.49  
 140.39  
 140.33  
 140.23  
 134.84  
 133.76  
 132.43  
 132.33  
 131.89  
 131.87  
 131.78  
 131.49  
 131.47  
 130.94  
 130.84  
 130.73  
 128.48  
 128.36  
 128.32  
 128.17  
 128.12  
 128.00

— 134.84

— 133.76

132.43

132.33

131.89

131.87

131.78

131.49

131.47

130.94

130.84

130.73

128.48

128.36

128.32

128.17

128.12

128.00

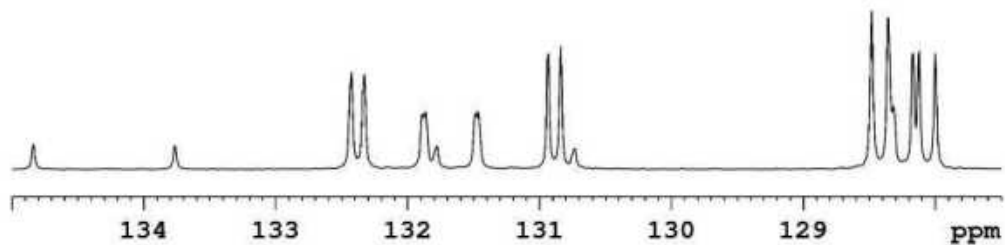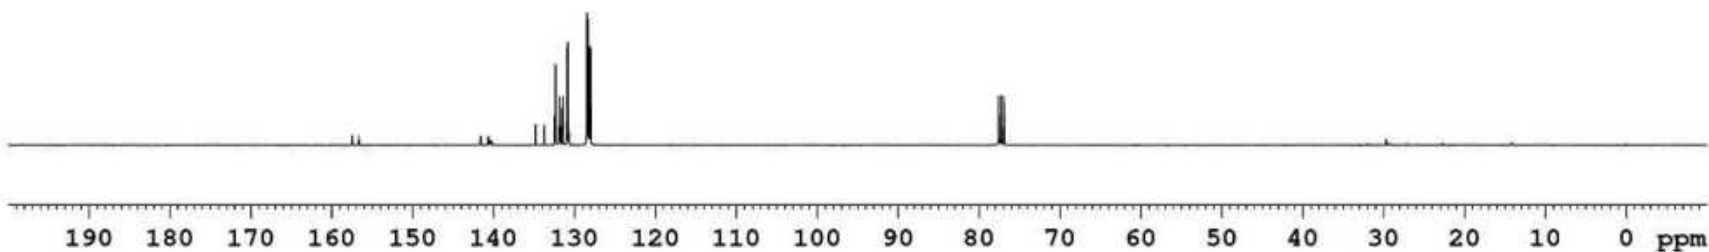

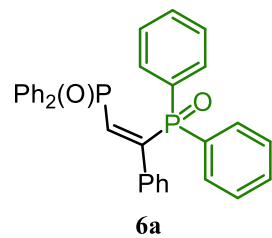

< 25.13  
25.04

< 18.42  
18.33

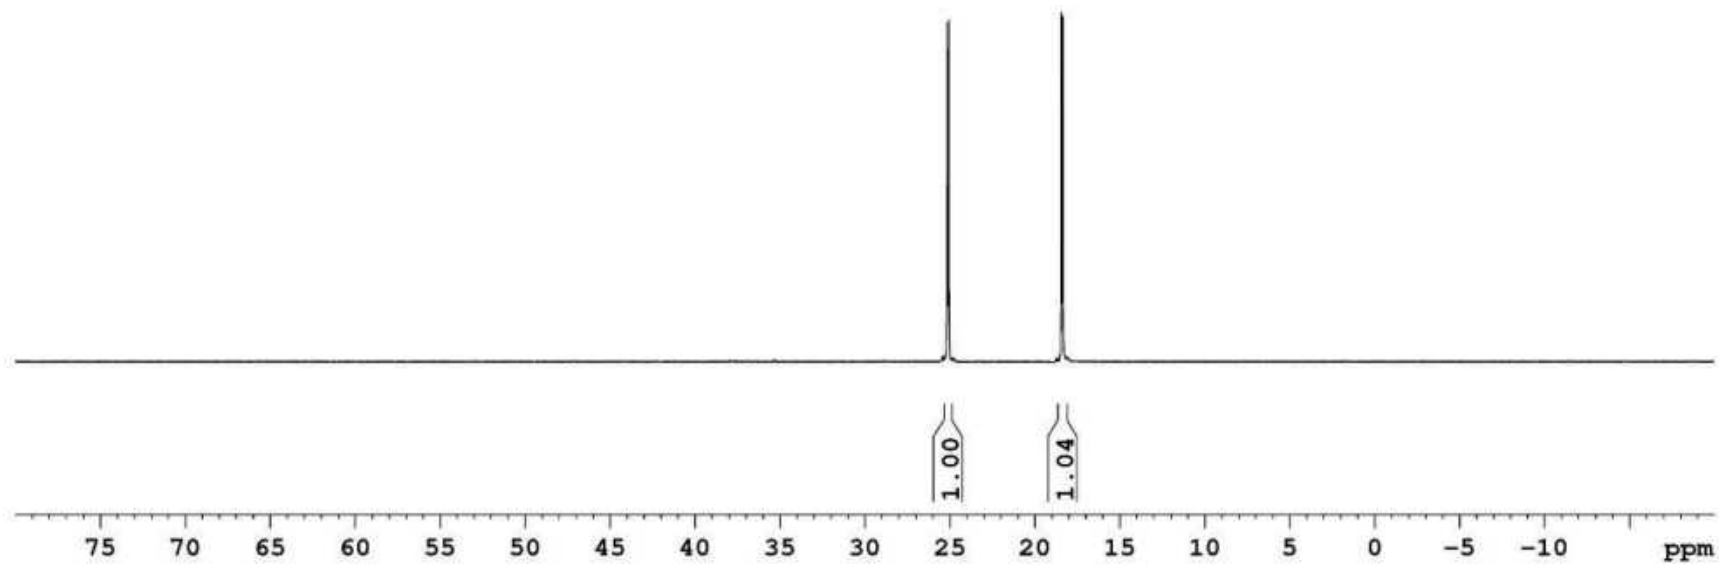

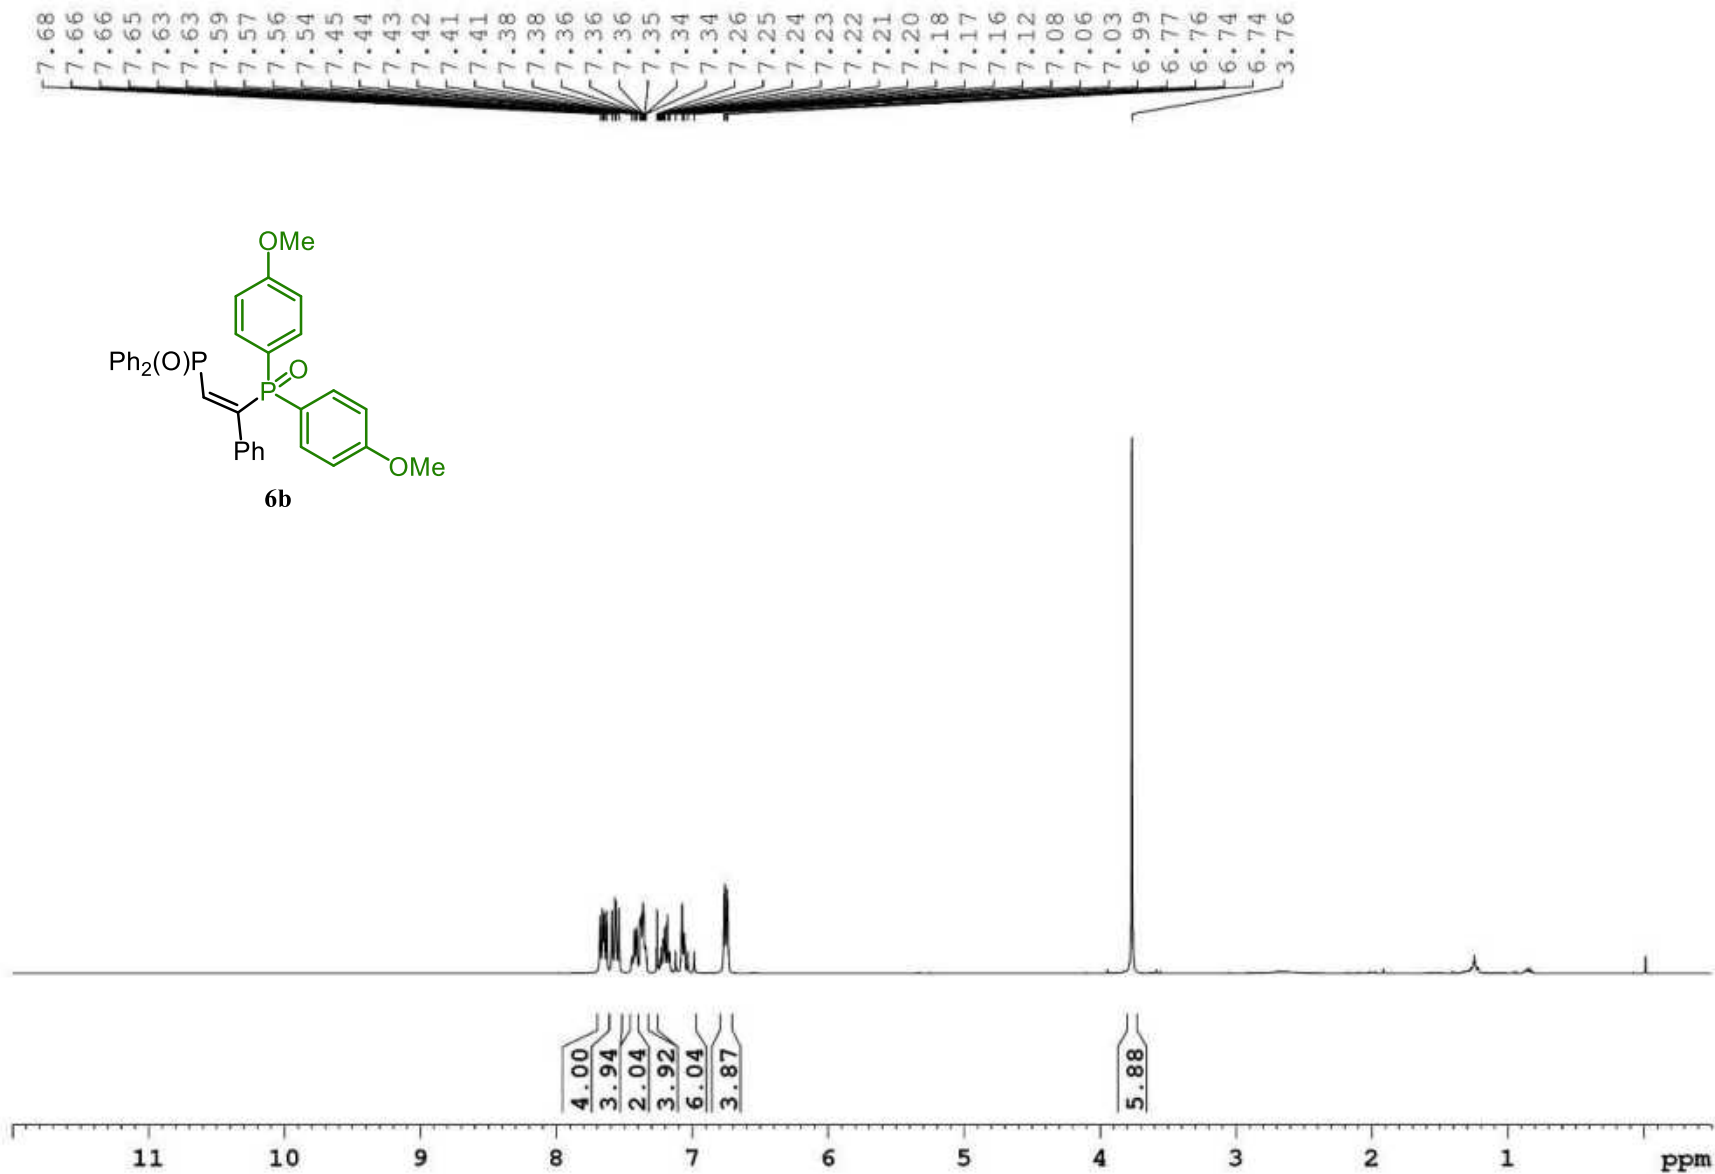

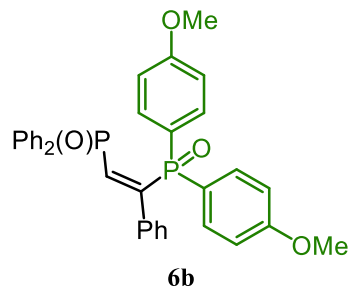

162.40  
 162.37  
 158.86  
 158.02  
 140.90  
 140.80  
 140.73  
 140.63  
 140.21  
 140.13  
 139.28  
 139.20  
 135.29  
 134.62  
 134.50  
 134.22  
 131.32  
 131.29  
 130.77  
 130.68  
 128.39  
 128.34  
 128.27  
 128.12  
 122.86  
 121.75  
 113.62  
 113.48

— 55.23

— 135.29  
 < 134.62  
 < 134.50  
 < 134.22

< 131.32  
 < 131.29  
 < 130.77  
 < 130.68

< 128.39  
 < 128.34  
 < 128.27  
 < 128.12

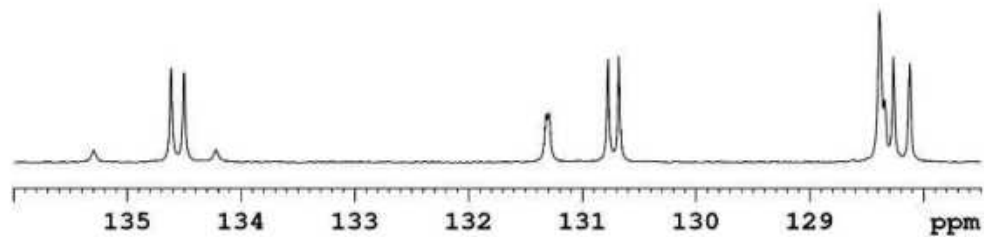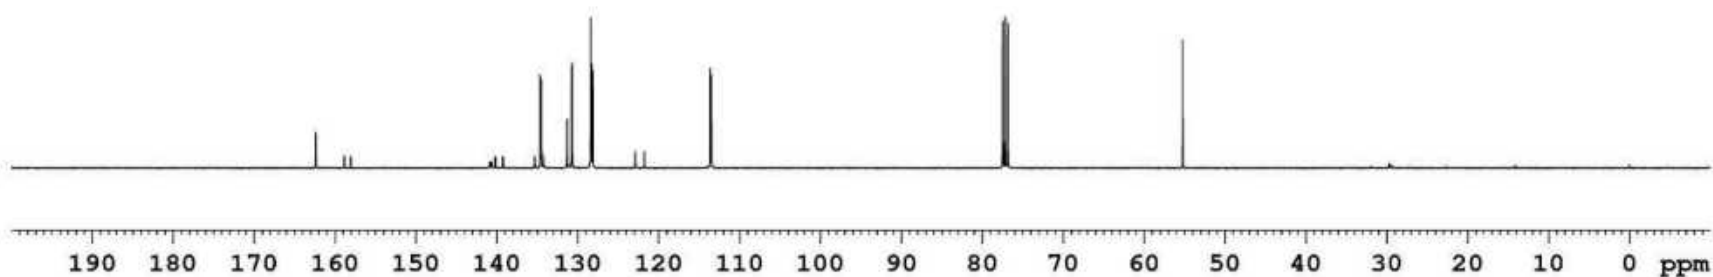

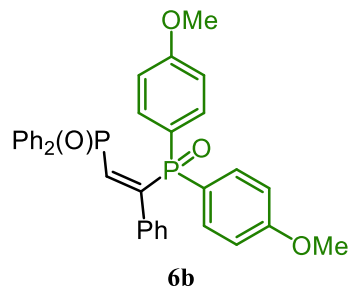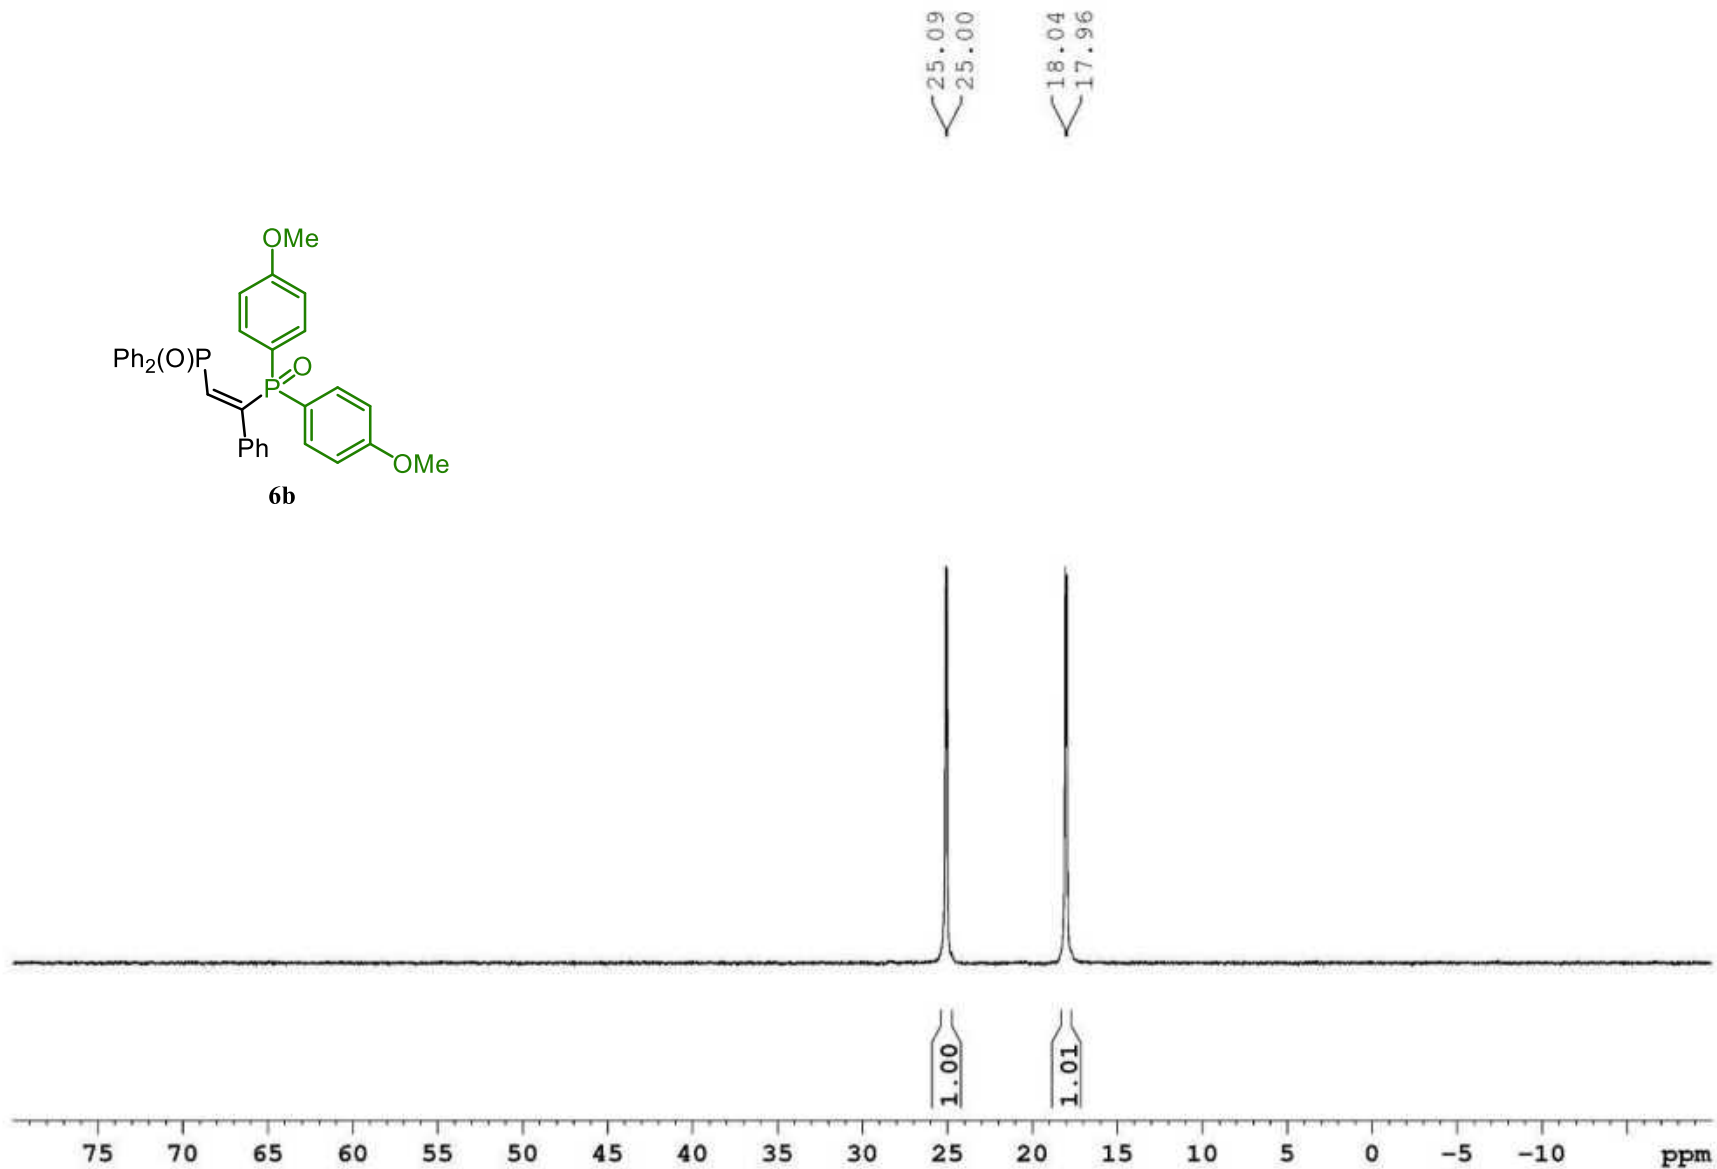

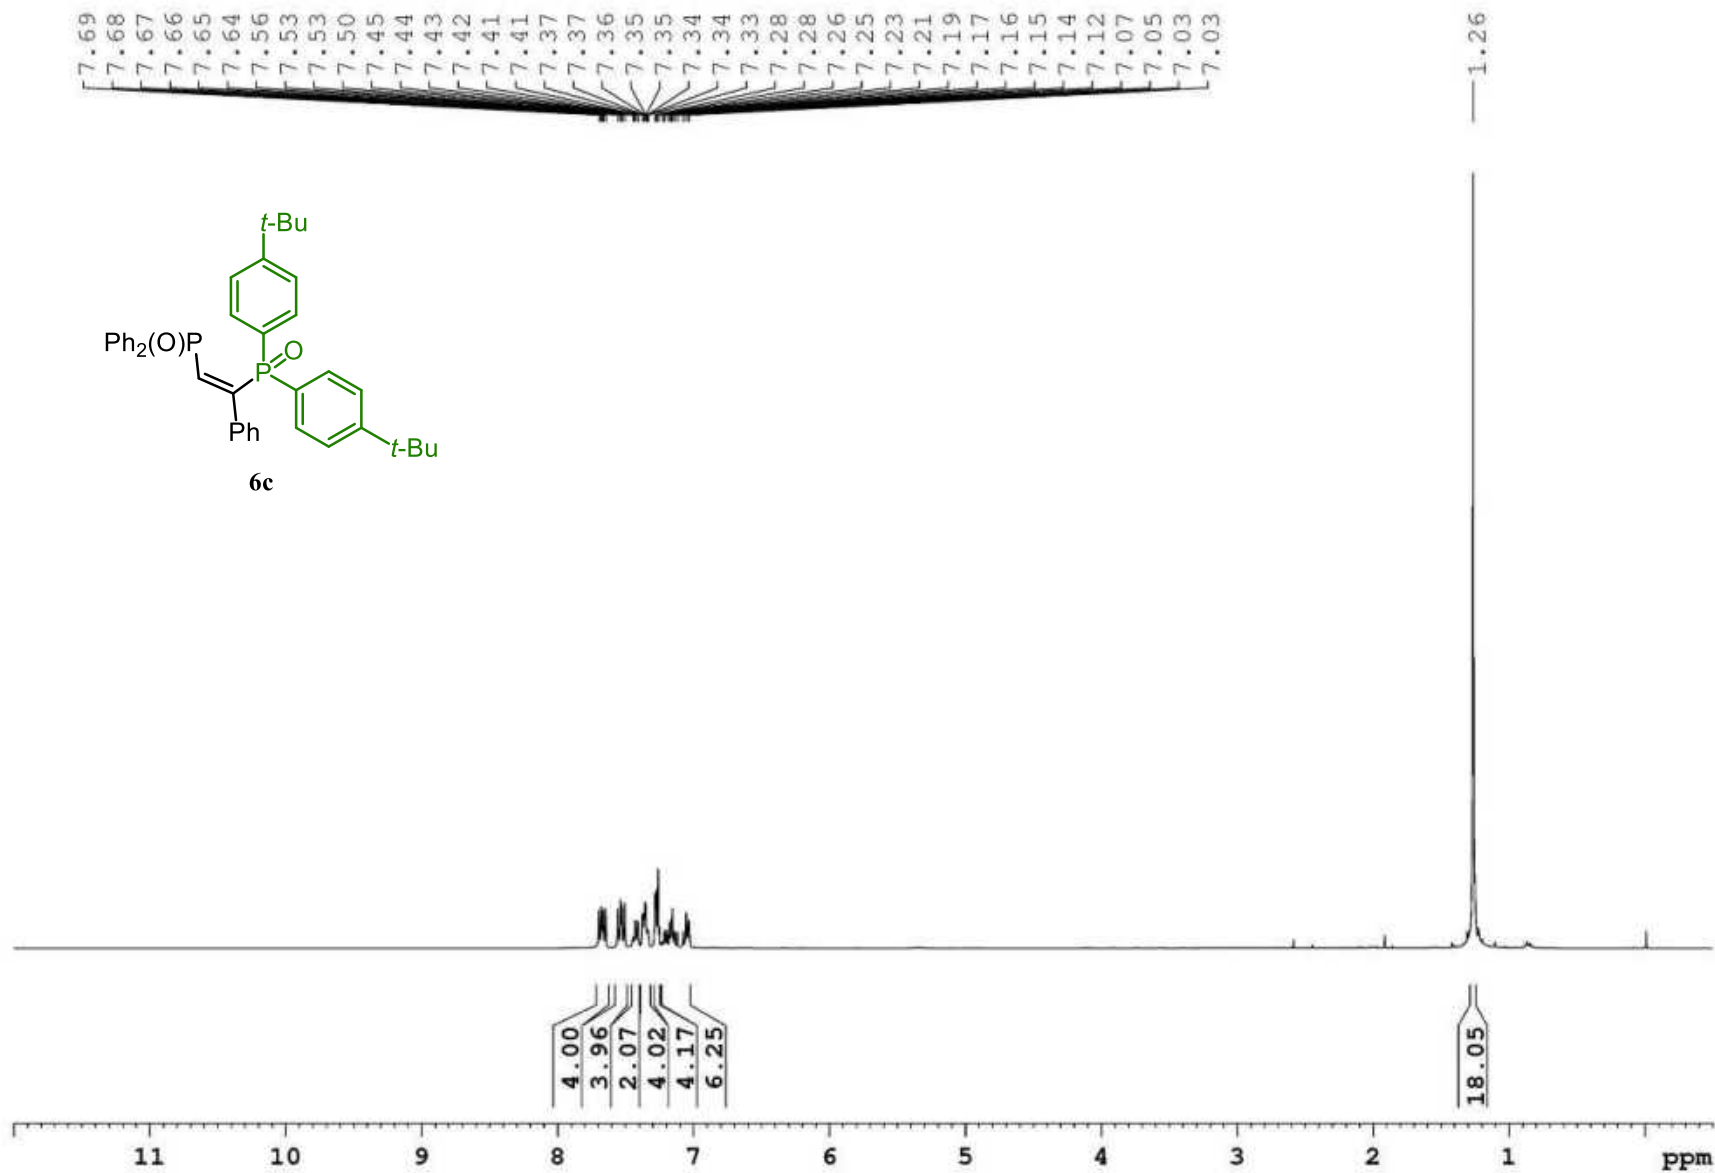

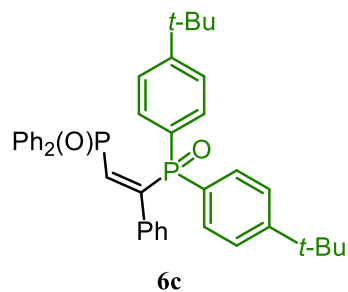

157.98  
157.15  
155.12  
155.09  
140.86  
140.78  
140.70  
140.63  
140.53  
139.93  
139.85  
134.95  
133.88  
132.32  
132.22  
131.40  
131.37  
130.98  
130.88  
128.68  
128.42  
128.39  
128.30  
128.04  
127.61  
125.11  
124.98

— 34.91  
— 31.10

132.32  
132.22

131.40  
131.37  
130.98  
130.88

128.68  
128.42  
128.39  
128.30  
128.04

127.61

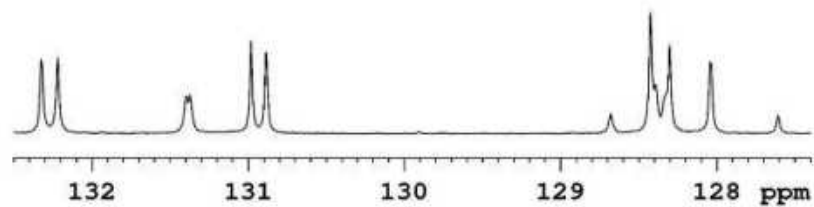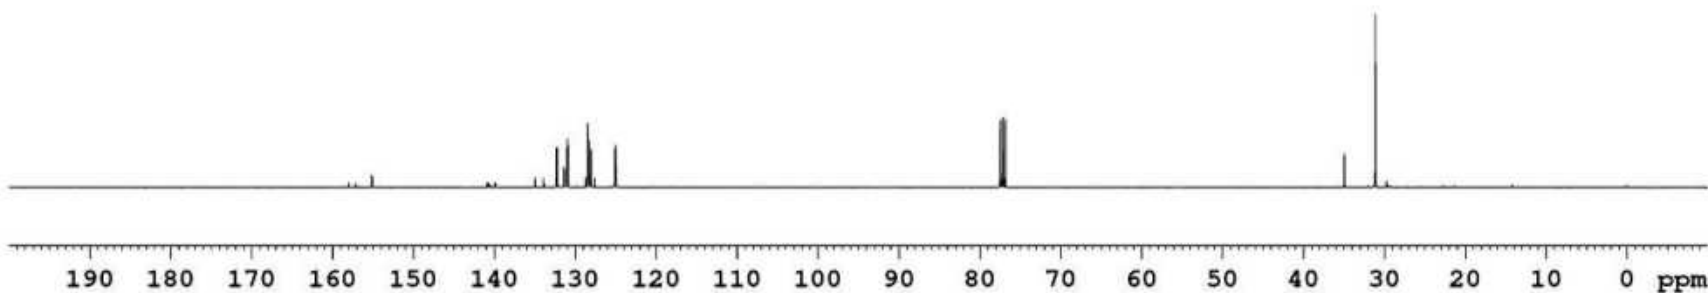



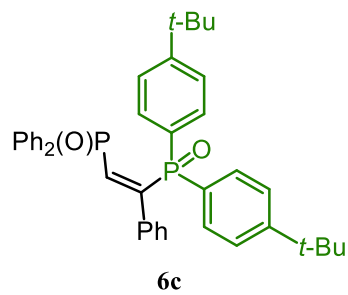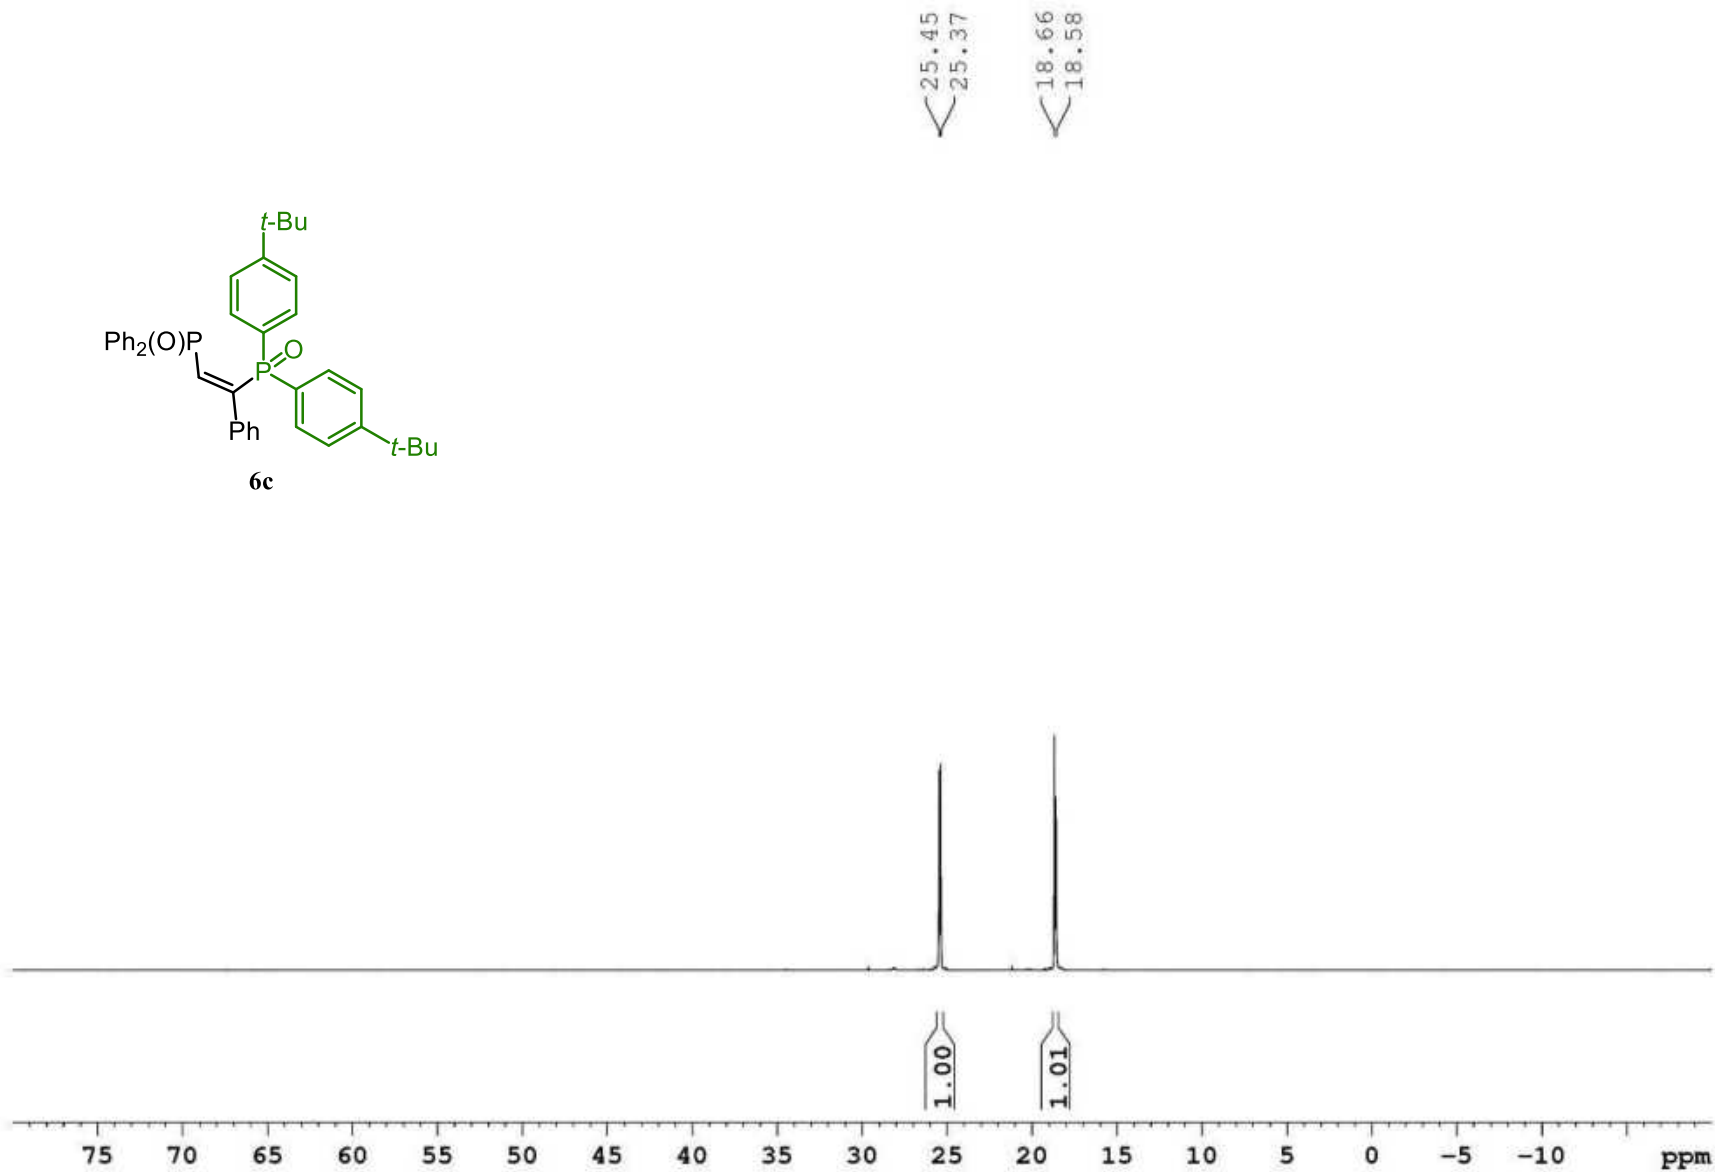

7.77  
7.76  
7.75  
7.74  
7.74  
7.73  
7.72  
7.71  
7.70  
7.70  
7.61  
7.59  
7.59  
7.58  
7.56  
7.56  
7.47  
7.47  
7.47  
7.46  
7.46  
7.45  
7.45  
7.44  
7.44  
7.43  
7.40  
7.40  
7.39  
7.38  
7.38  
7.37  
7.36  
7.36  
7.28  
7.27  
7.26  
7.25  
7.24  
7.22  
7.21  
7.21  
7.20  
7.19  
7.15  
7.15  
7.15  
7.13  
7.10  
7.10  
7.05  
6.96  
6.96  
6.94  
6.92  
6.92  
6.91

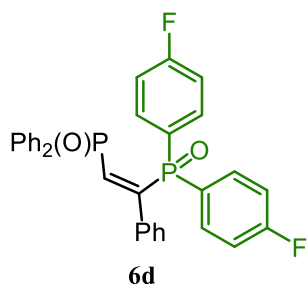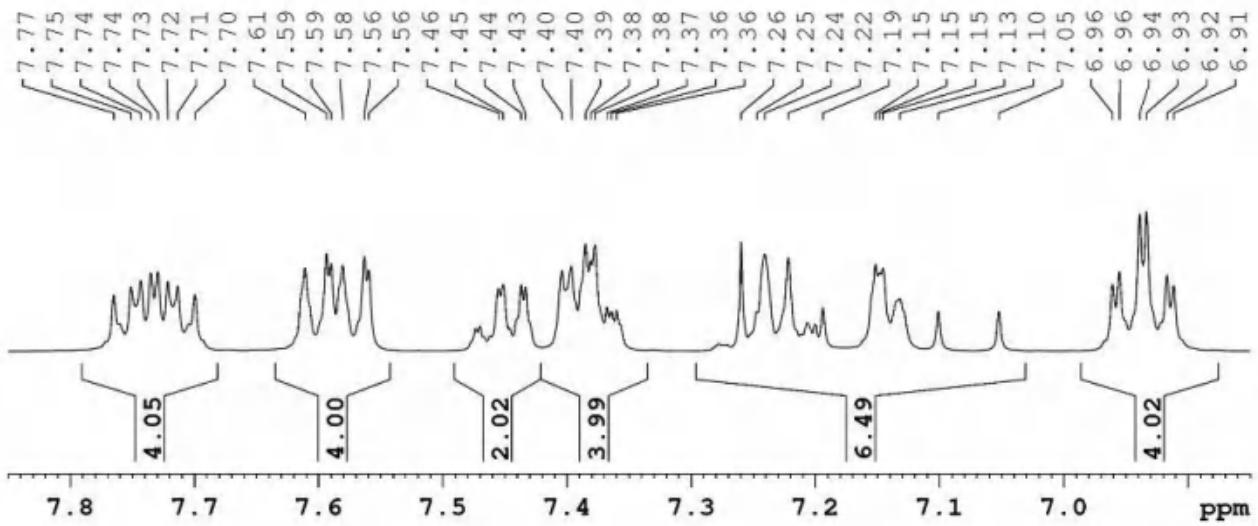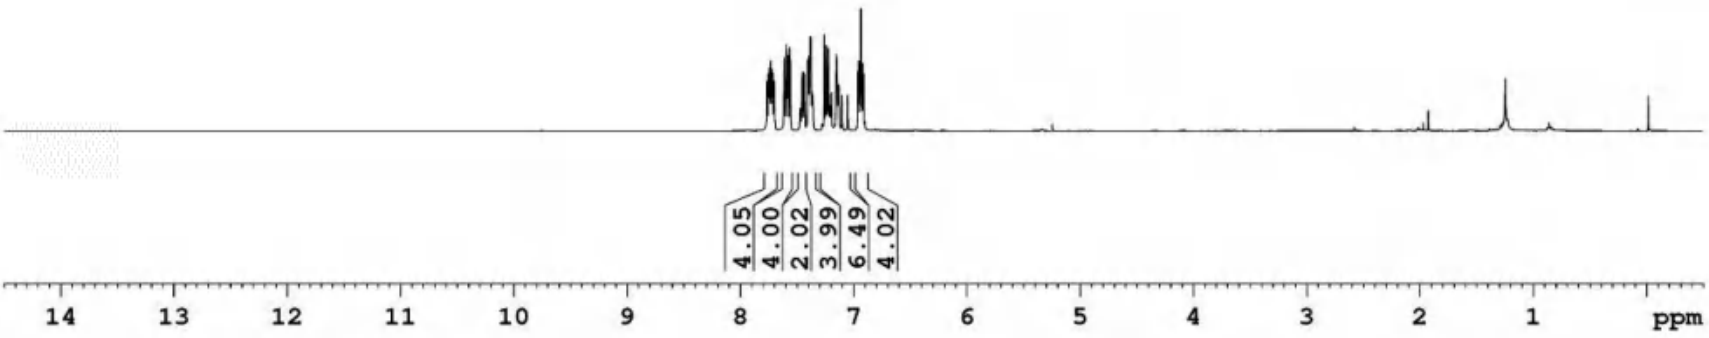

166.36  
166.32  
163.83  
163.80  
157.64  
156.79  
140.64  
140.55  
140.51  
140.42  
140.35  
140.25  
139.73  
139.64  
135.30  
135.21  
135.18  
135.09  
134.49  
133.42  
131.70  
131.68  
130.63  
130.54  
128.70  
128.62  
128.50  
128.29  
127.63  
127.60  
126.55  
126.52  
115.54  
115.40  
115.33  
115.19

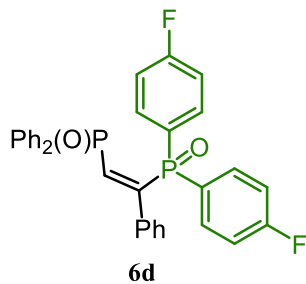

135.30  
135.21  
135.18  
135.09  
— 134.49  
  
— 133.42  
  
131.70  
131.68  
  
130.63  
130.54  
  
128.70  
128.62  
128.50  
128.29  
127.63  
127.60  
  
126.55  
126.52

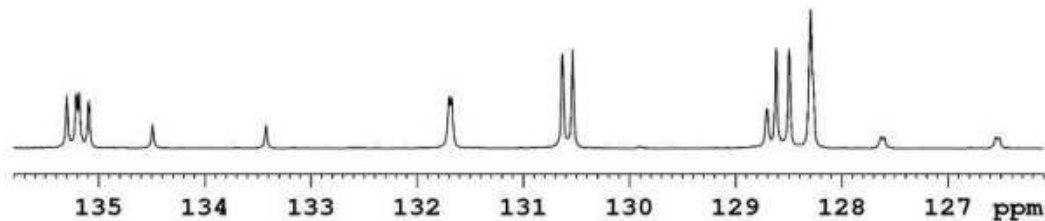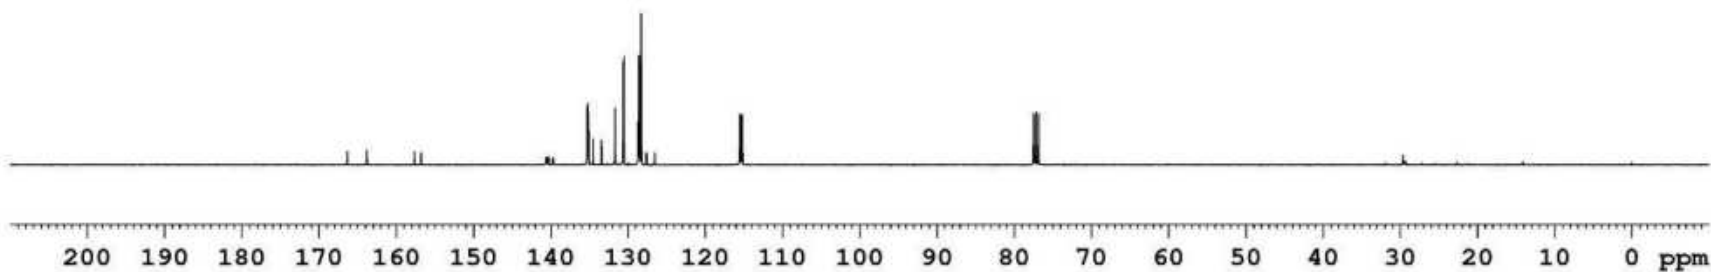

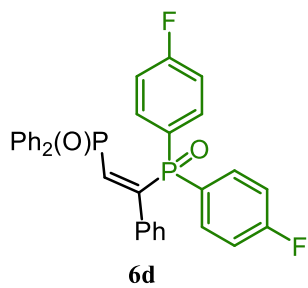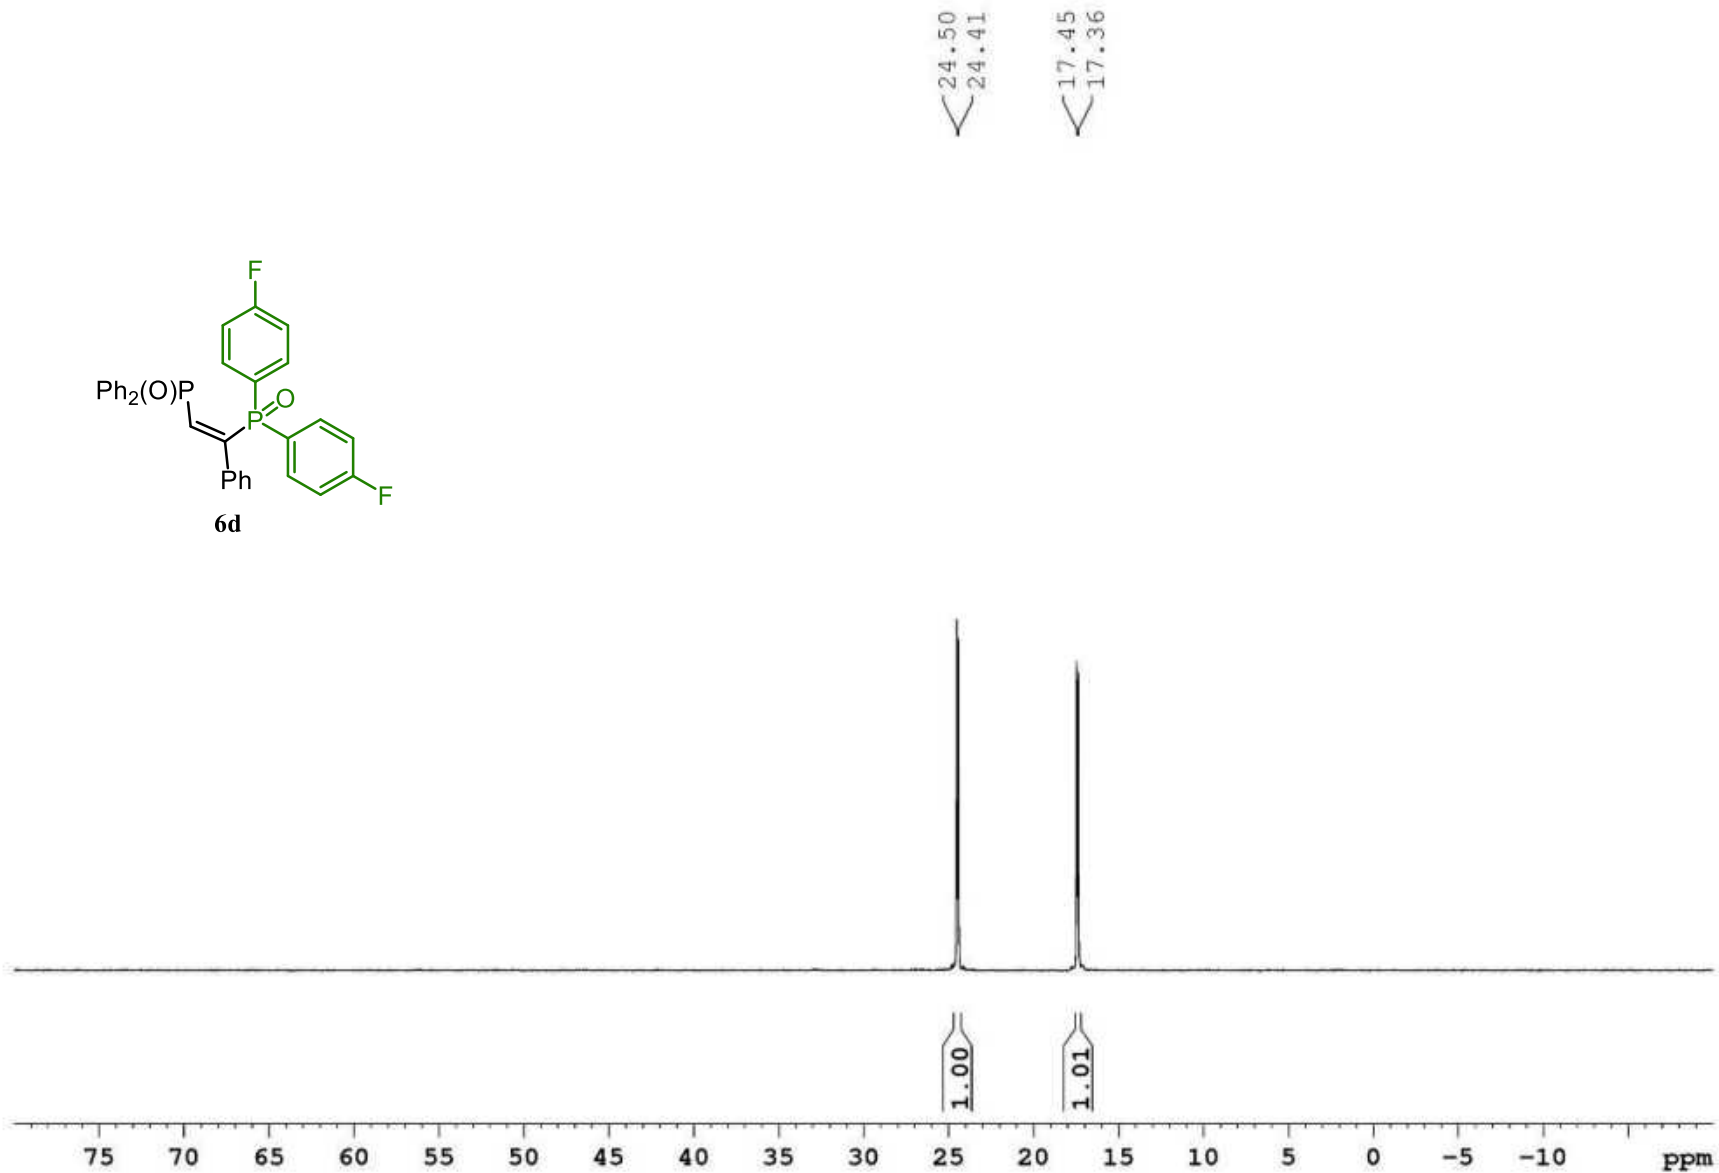

7.83  
7.81  
7.80  
7.78  
7.59  
7.57  
7.56  
7.54  
7.50  
7.48  
7.46  
7.42  
7.41  
7.40  
7.39  
7.38  
7.37  
7.30  
7.28  
7.27  
7.26  
7.25  
7.23  
7.23  
7.19  
7.17  
7.14  
7.11  
7.09

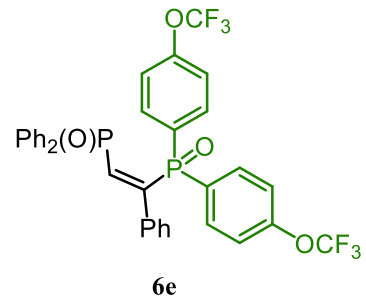

7.83  
7.81  
7.80  
7.78

7.59  
7.57  
7.56  
7.54  
7.50  
7.48  
7.46  
7.42  
7.41  
7.40  
7.39  
7.38  
7.37  
7.30  
7.28  
7.27  
7.26  
7.25  
7.23  
7.23  
7.19  
7.17  
7.14  
7.11  
7.09

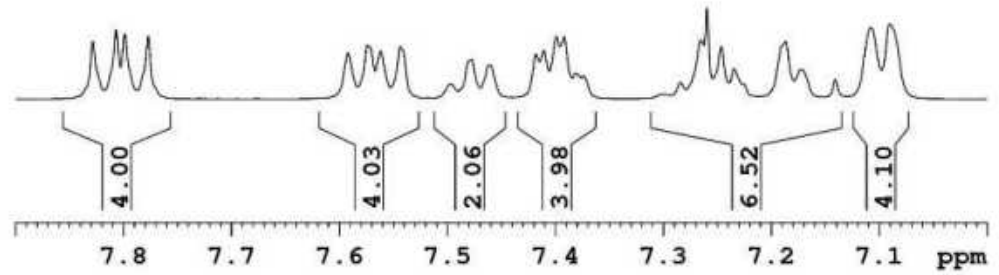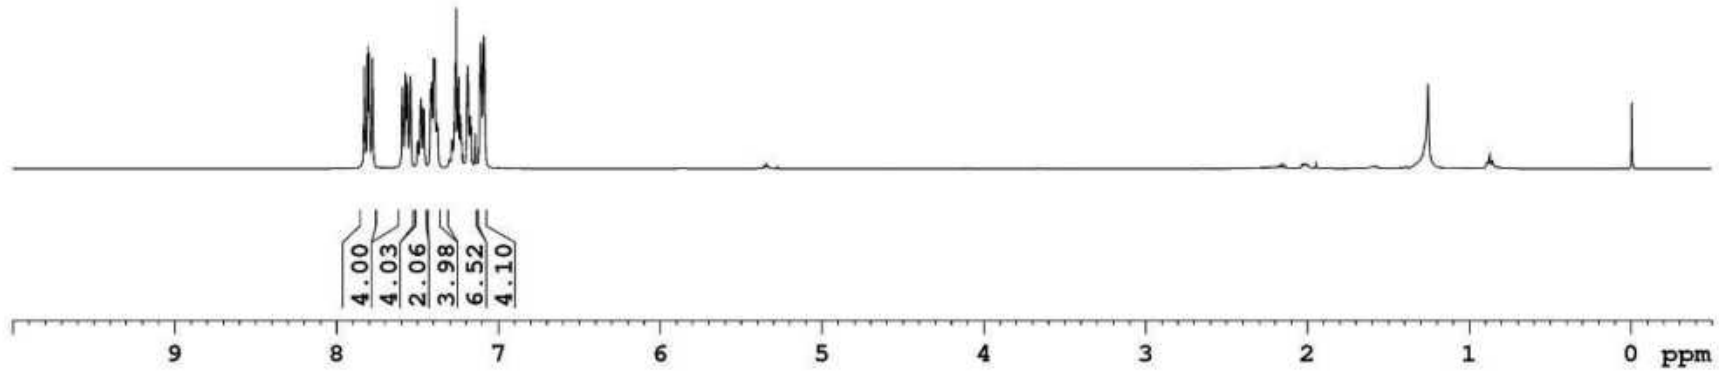

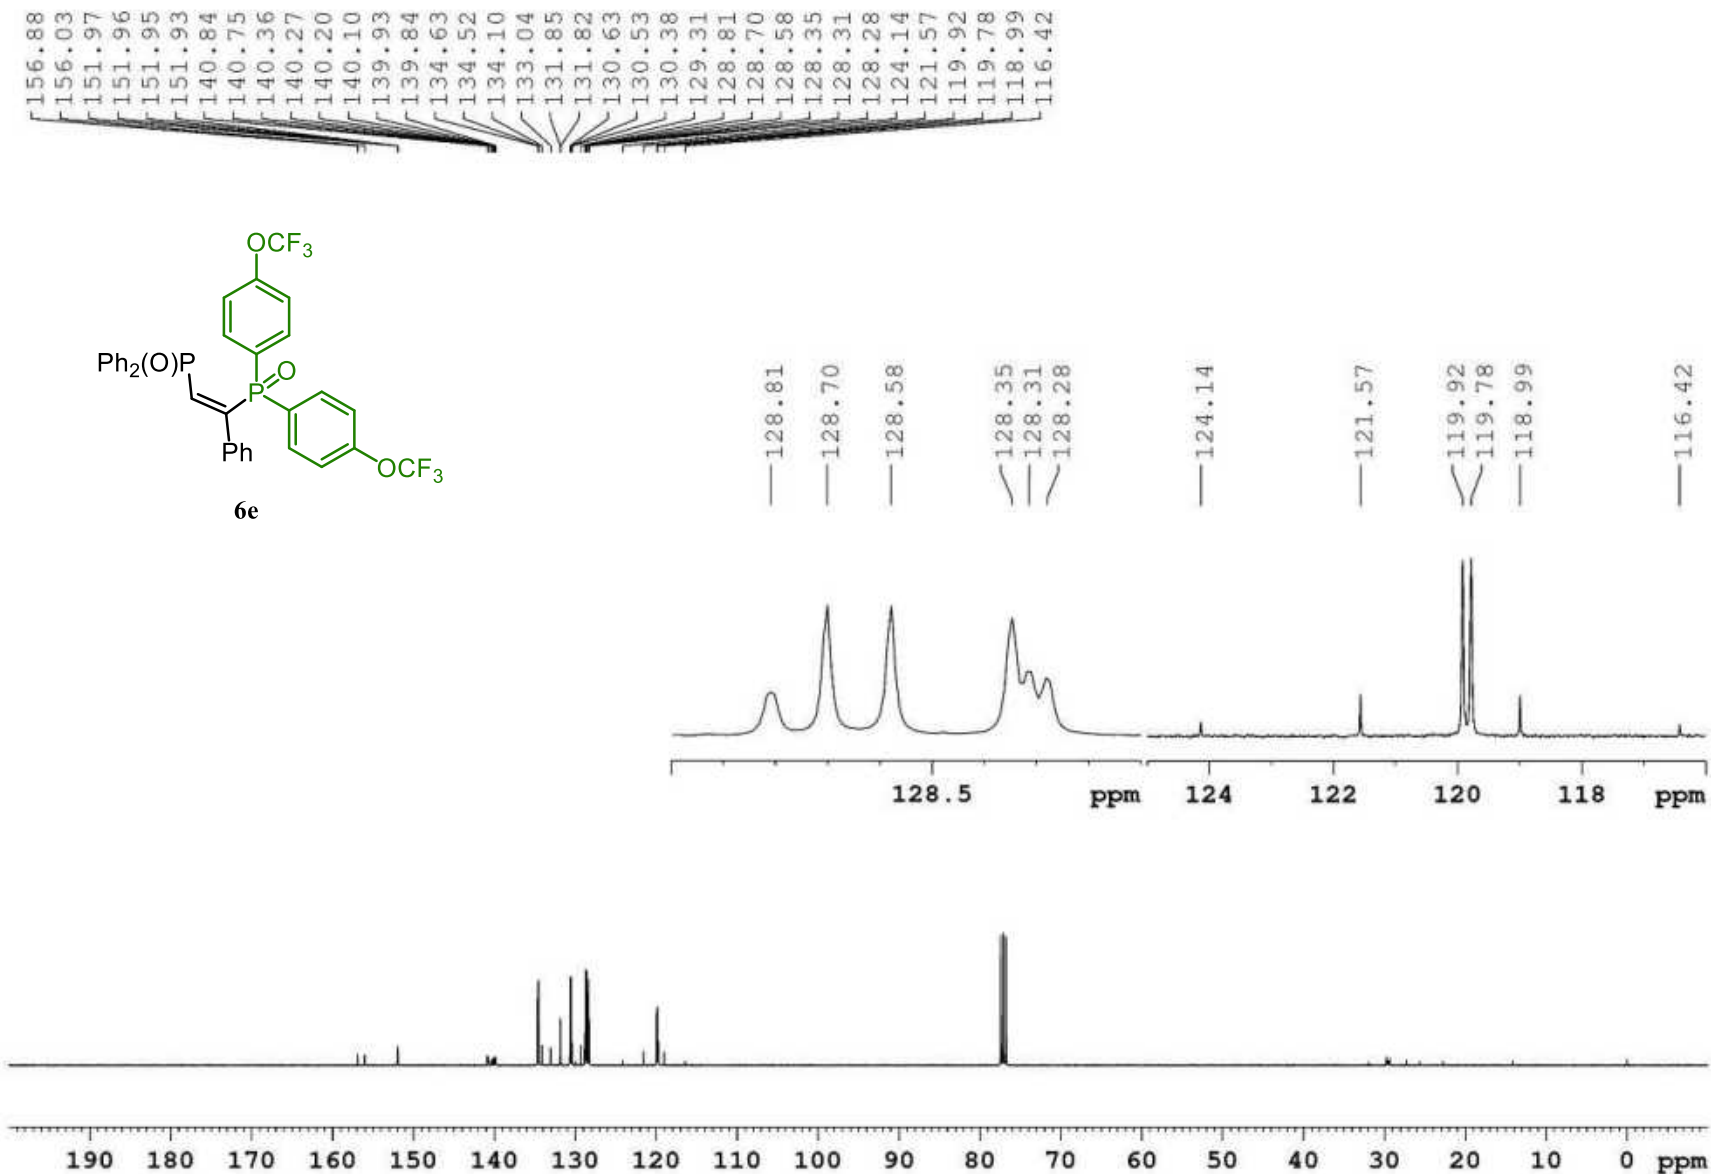

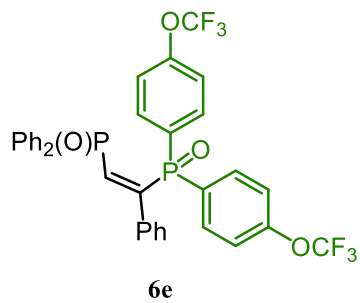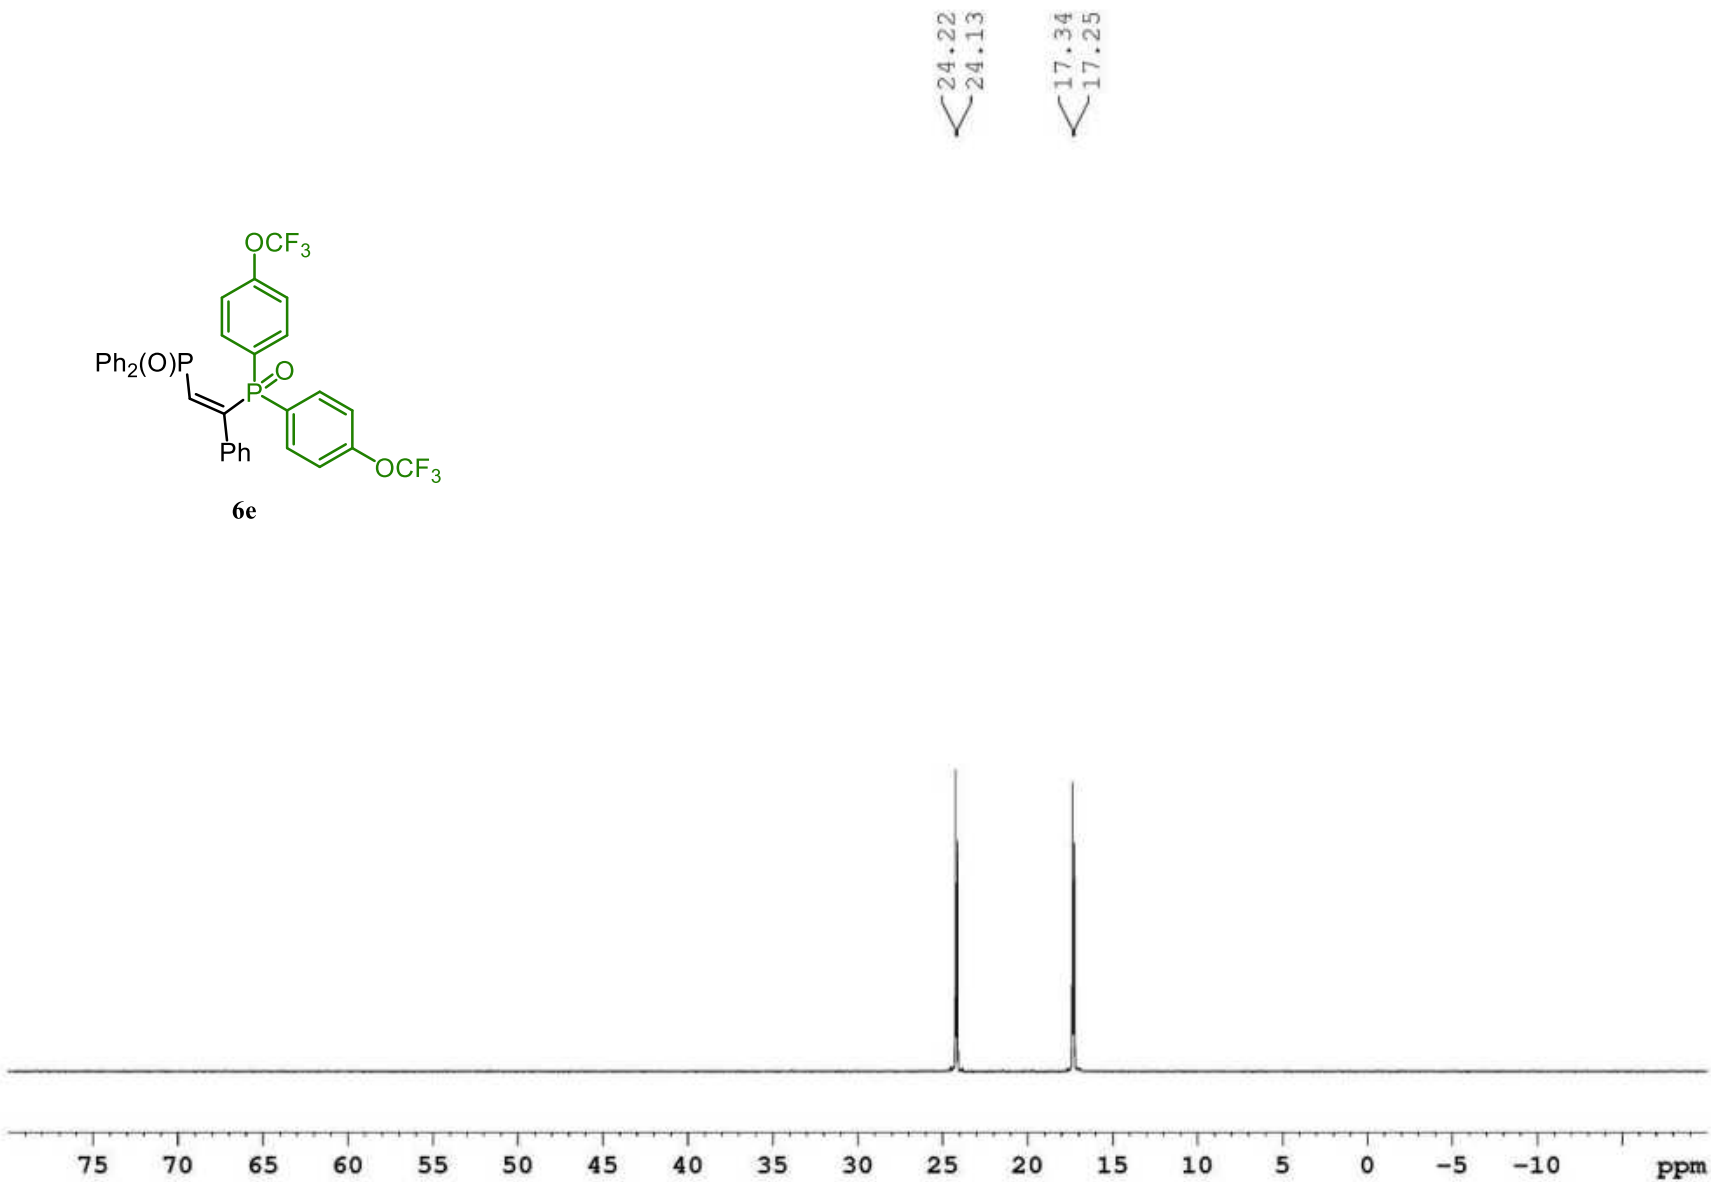

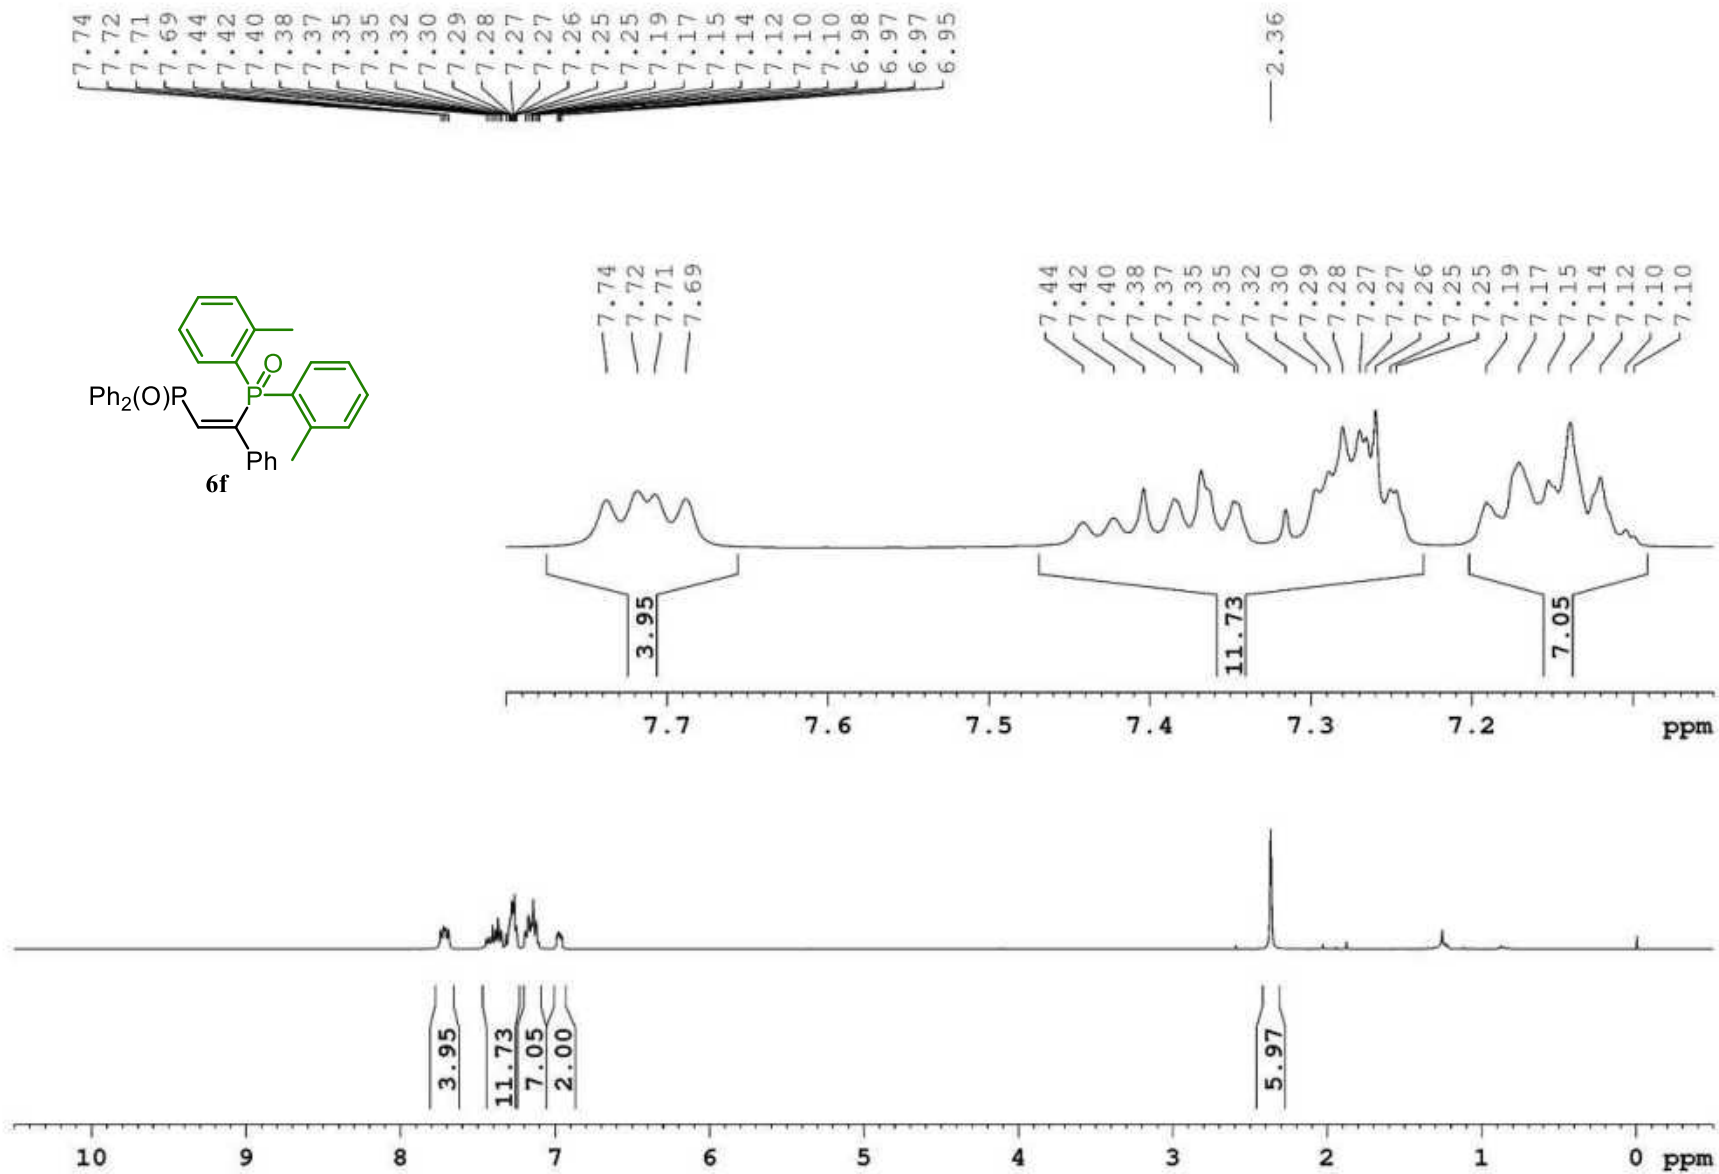



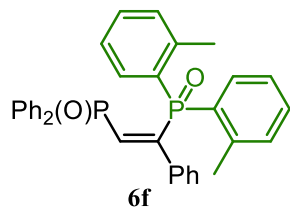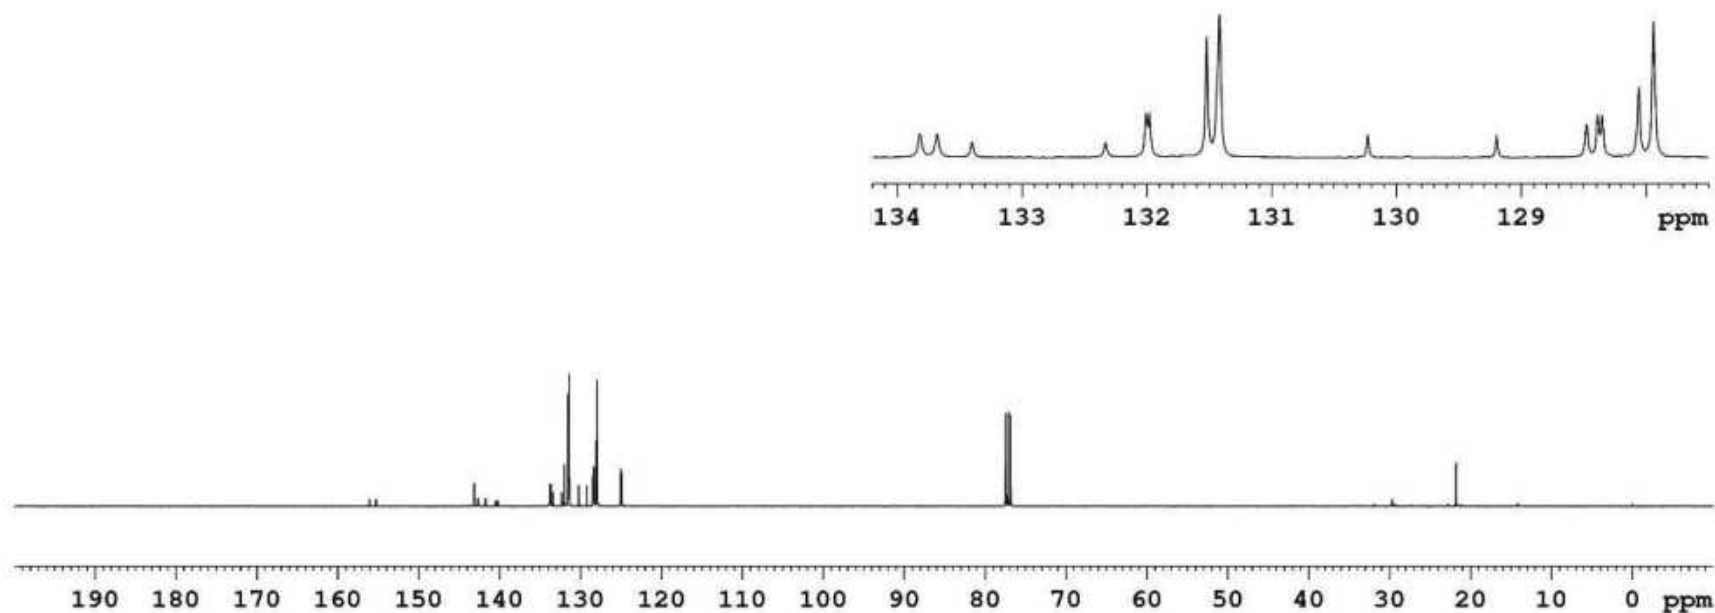

156.07  
 155.25  
 143.20  
 143.12  
 142.70  
 142.62  
 141.77  
 141.69  
 140.49  
 140.39  
 140.32  
 140.22  
 133.82  
 133.68  
 133.40  
 132.33  
 132.01  
 131.98  
 131.52  
 131.42  
 130.23  
 129.20  
 128.48  
 128.39  
 128.35  
 128.06  
 127.94  
 125.03  
 124.90

21.83  
 21.79

133.82  
 133.68  
 133.40

132.33  
 132.01  
 131.98  
 131.52  
 131.42

130.23

129.20

128.48  
 128.39  
 128.35  
 128.06  
 127.94

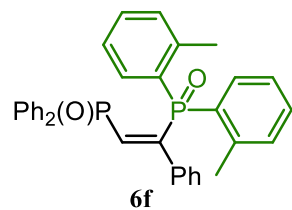

33.96  
33.87

21.28  
21.20

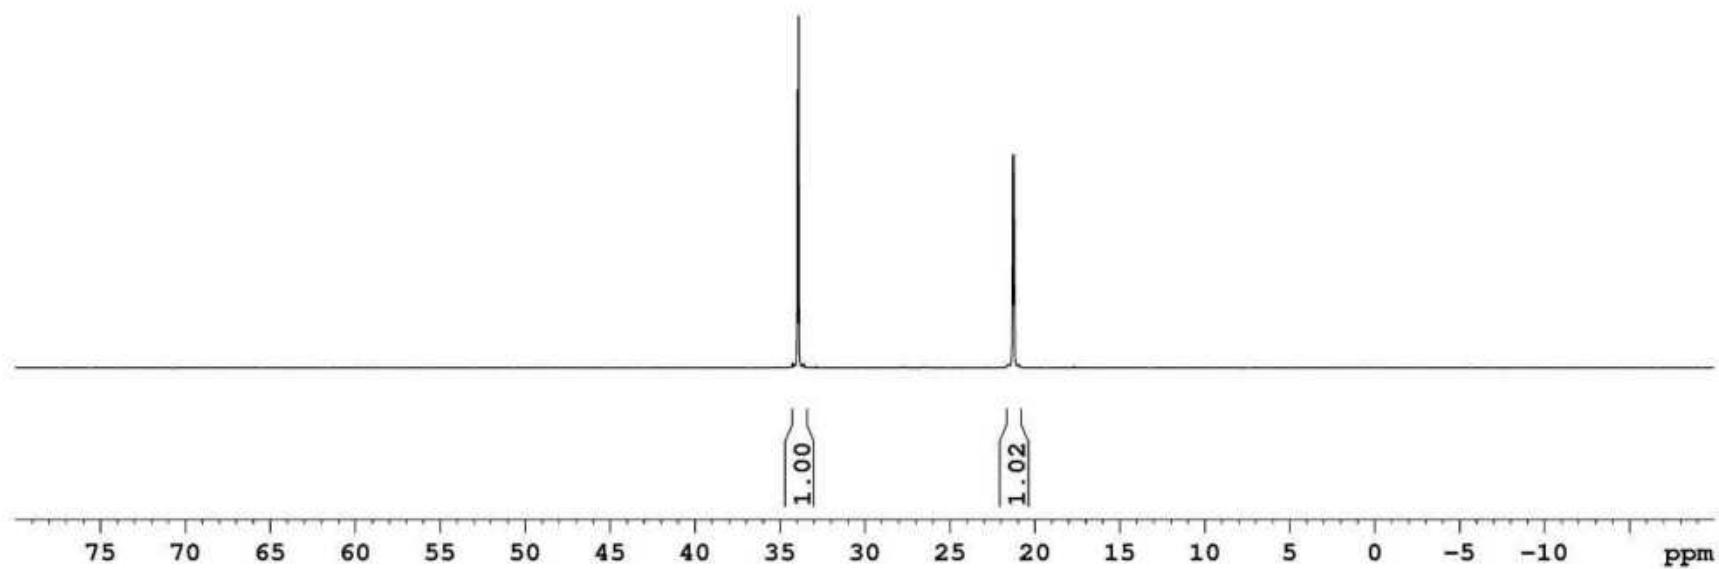

7.71  
7.69  
7.69  
7.68  
7.66  
7.66  
7.46  
7.46  
7.45  
7.44  
7.44  
7.42  
7.42  
7.41  
7.39  
7.38  
7.37  
7.36  
7.35  
7.35  
7.35  
7.26  
7.25  
7.24  
7.23  
7.22  
7.21  
7.20  
7.19  
7.18  
7.17  
7.16  
7.15  
7.14  
7.13  
7.09  
7.08  
7.06  
7.04

— 2.21

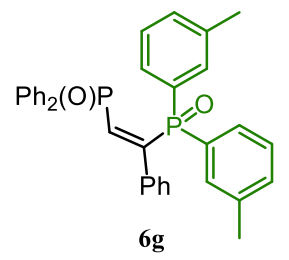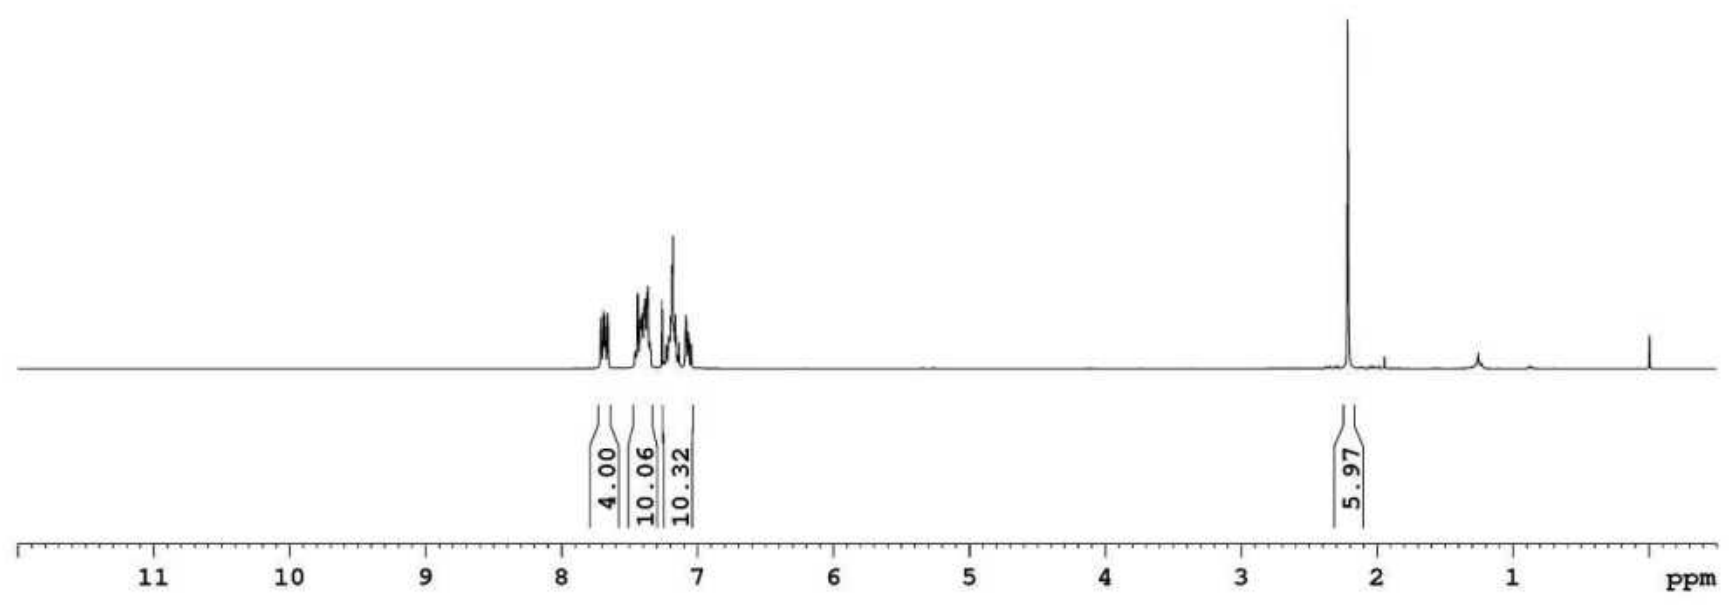

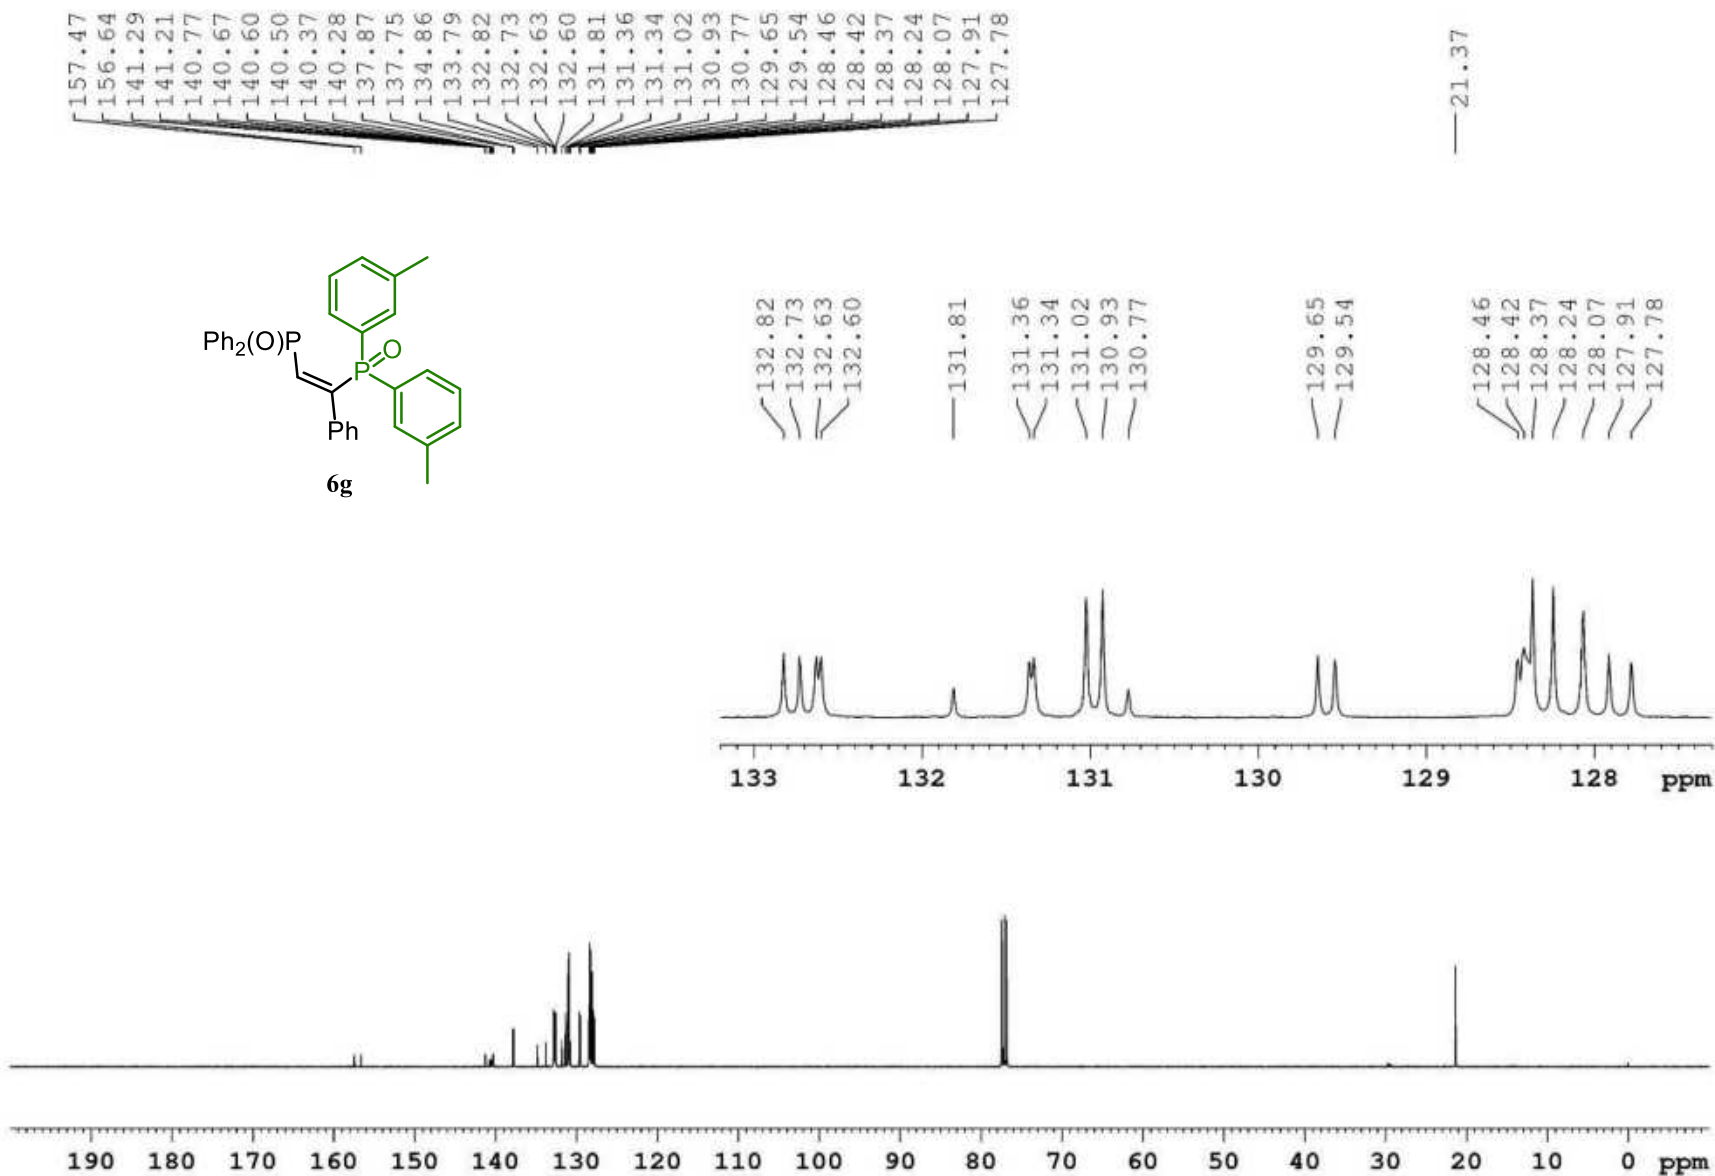

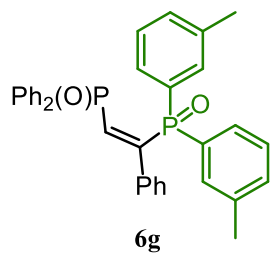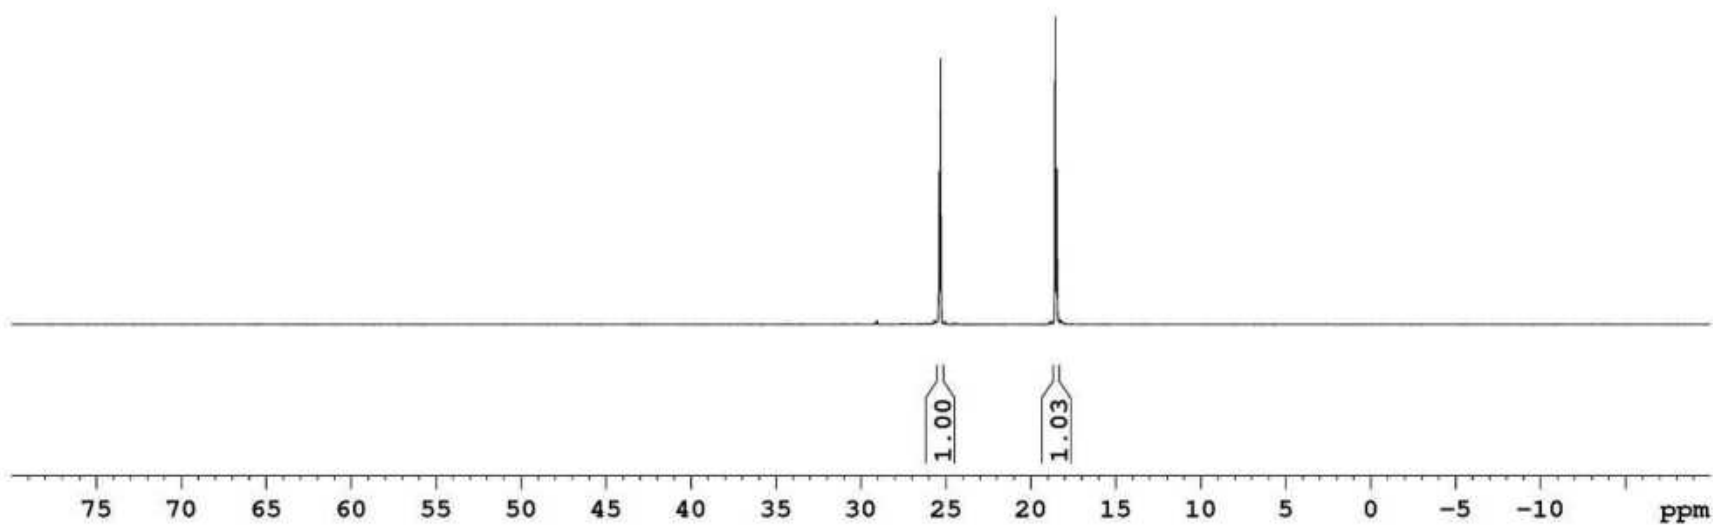

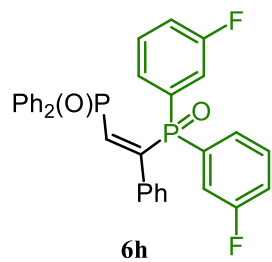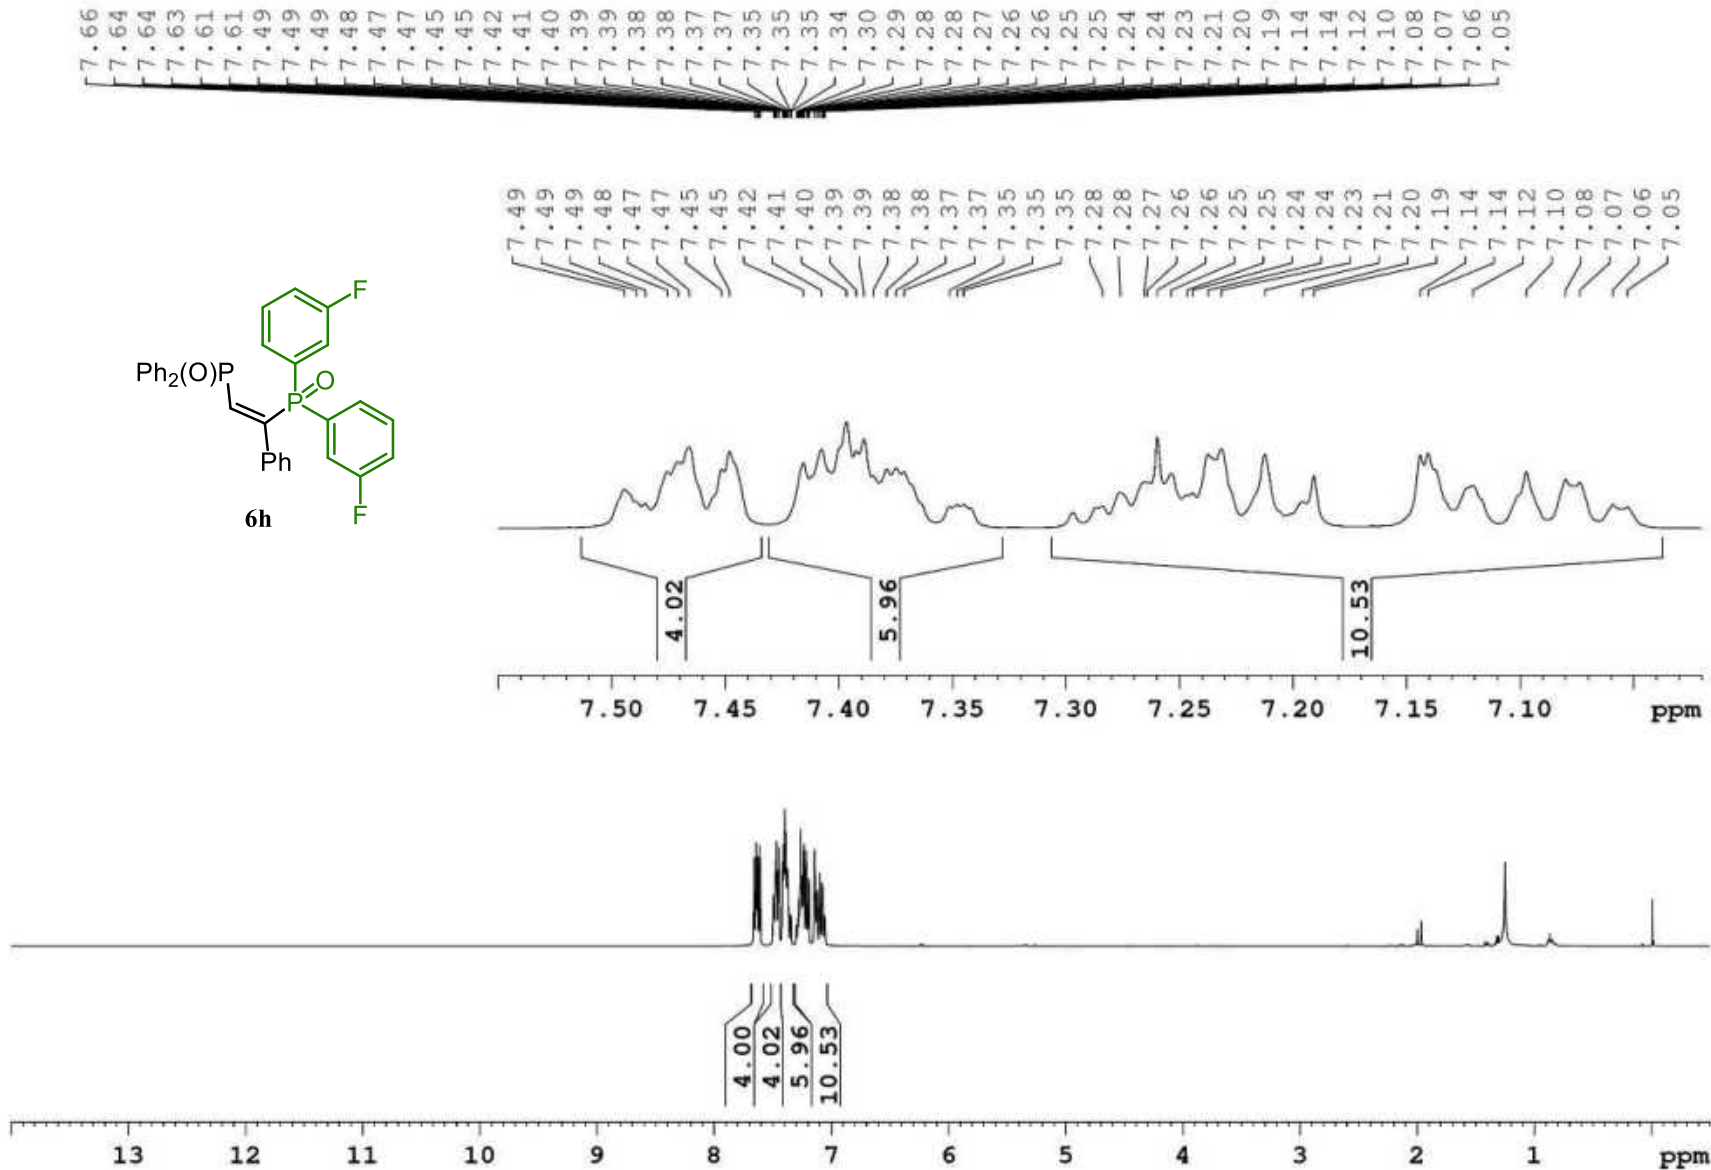



163.45  
 163.28  
 160.97  
 160.80  
 156.12  
 155.27  
 141.94  
 141.85  
 141.03  
 140.94  
 140.22  
 140.12  
 140.06  
 139.96  
 134.59  
 134.53  
 134.10  
 133.55  
 133.49  
 133.03  
 131.80  
 131.77  
 130.86  
 130.76  
 130.12  
 130.05  
 129.98  
 129.91  
 128.76  
 128.64  
 128.52  
 128.33  
 128.27  
 128.24  
 128.17  
 128.14  
 128.07  
 128.04  
 119.30  
 119.29  
 119.26  
 119.20  
 119.08  
 119.05  
 118.97

134.59  
 134.53  
 134.10  
 133.55  
 133.49  
 133.03  
 131.80  
 131.77  
 130.86  
 130.76  
 130.12  
 130.05  
 129.98  
 129.91  
 128.76  
 128.64  
 128.52  
 128.33  
 128.27  
 128.24  
 128.17  
 128.14  
 128.07  
 128.04

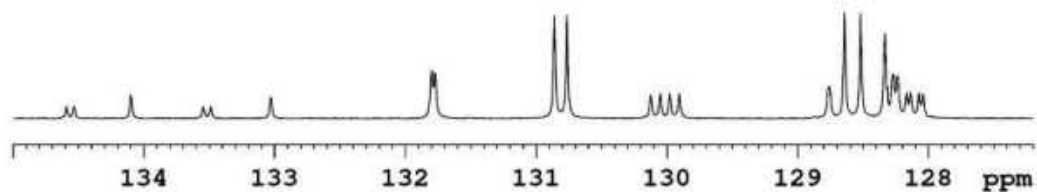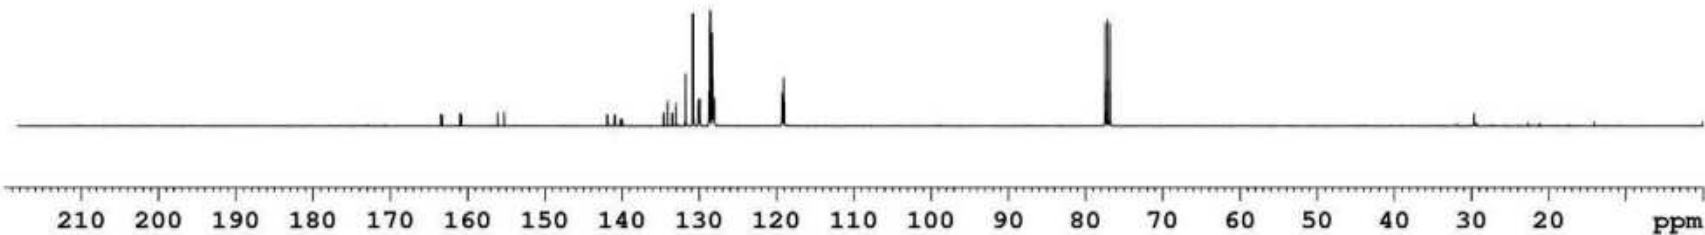

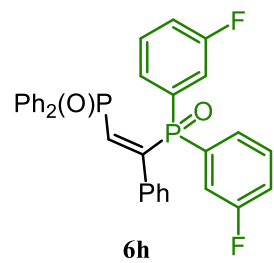

23.37  
23.33  
23.29  
23.25  
23.20  
17.97  
17.88

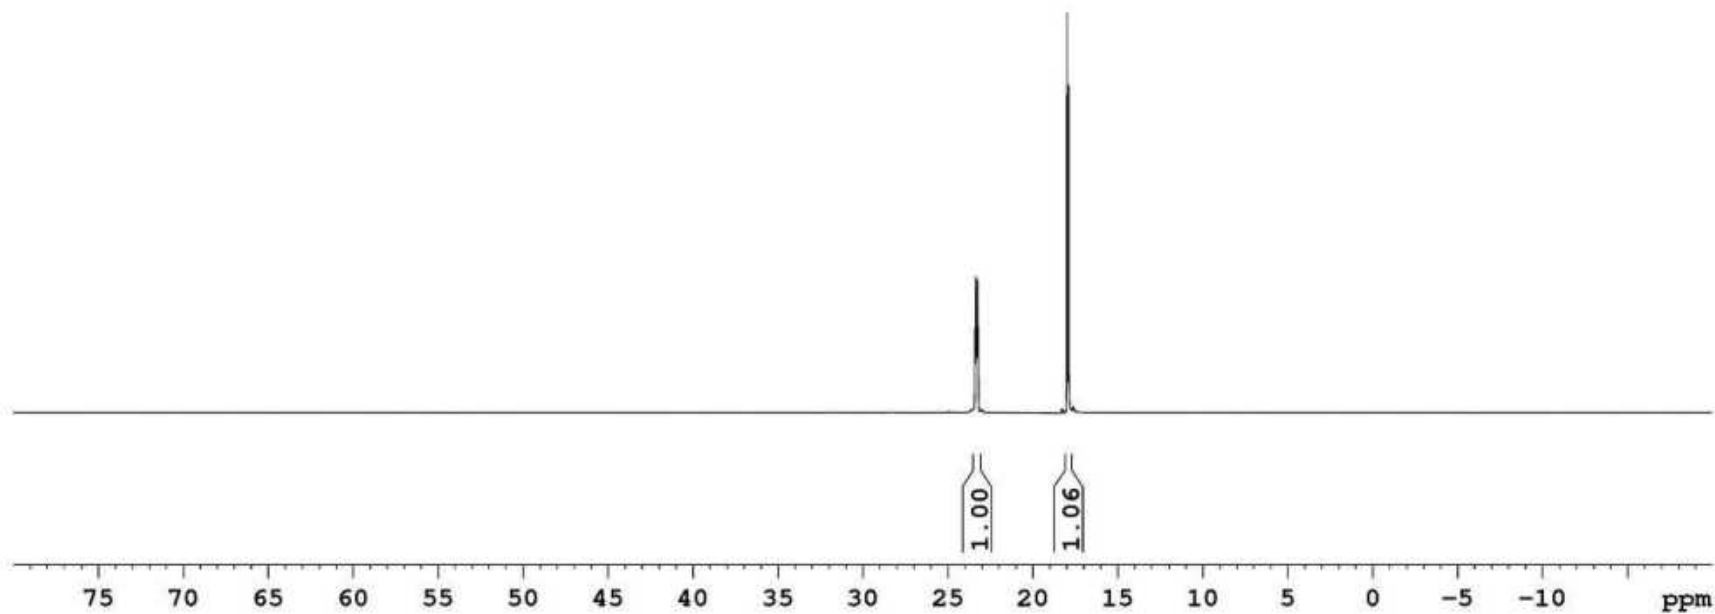



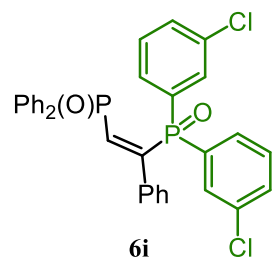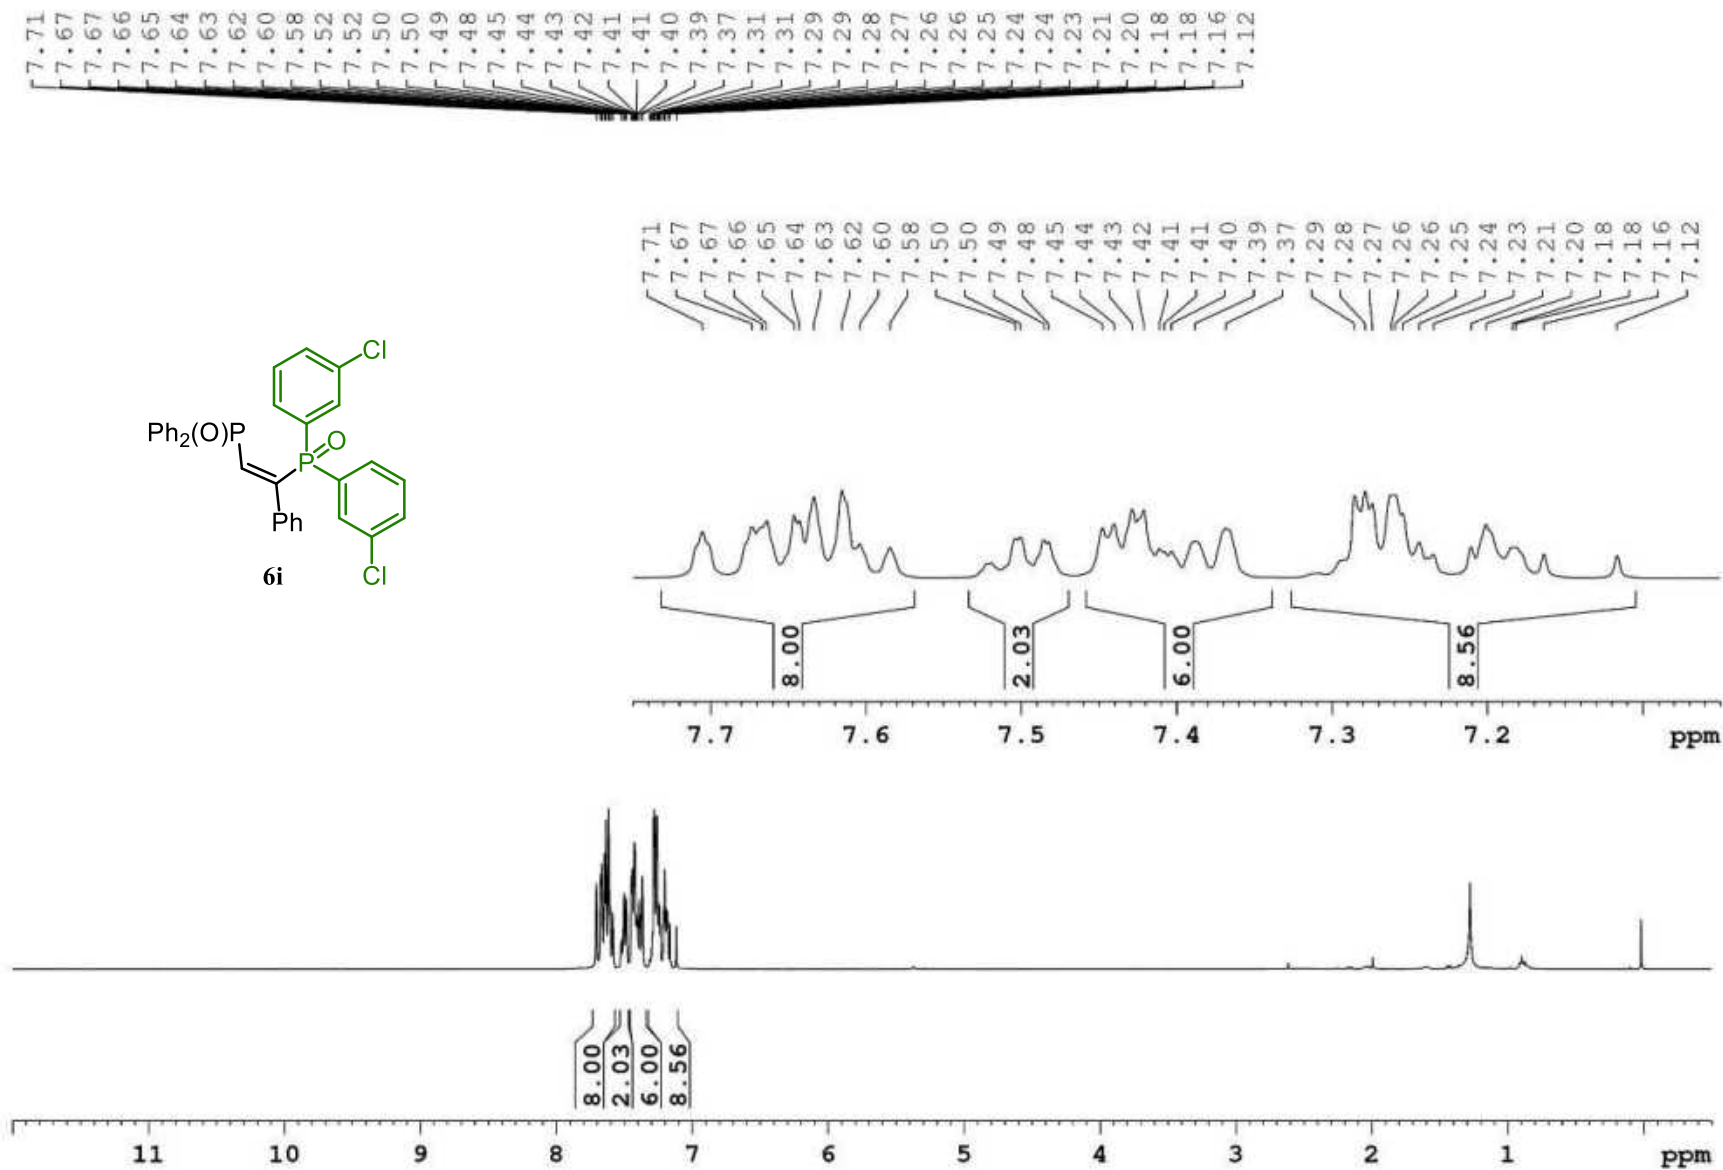

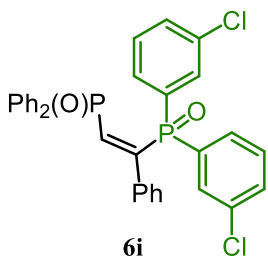

155.85  
 155.00  
 141.83  
 141.74  
 140.92  
 140.83  
 140.21  
 140.11  
 140.04  
 139.95  
 134.64  
 134.48  
 134.38  
 133.85  
 133.34  
 132.79  
 132.14  
 132.12  
 132.01  
 131.88  
 131.86  
 130.84  
 130.74  
 130.52  
 130.42  
 129.54  
 129.41  
 128.81  
 128.69  
 128.57  
 128.35  
 128.33  
 128.29

134.64  
 134.48  
 134.38  
 133.85  
 133.34  
 132.79  
 132.14  
 132.12  
 132.01  
 131.88  
 131.86  
 130.84  
 130.74  
 130.52  
 130.42  
 129.54  
 129.41  
 128.81  
 128.69  
 128.57  
 128.35  
 128.33  
 128.29

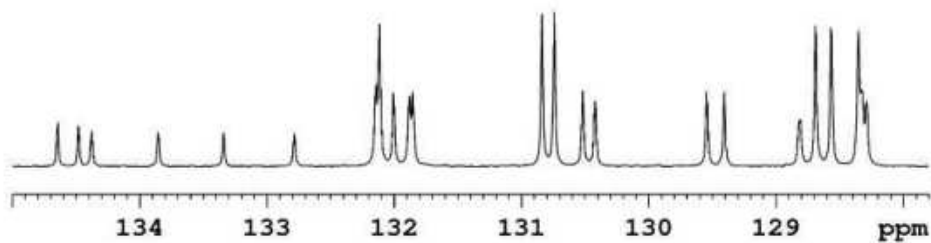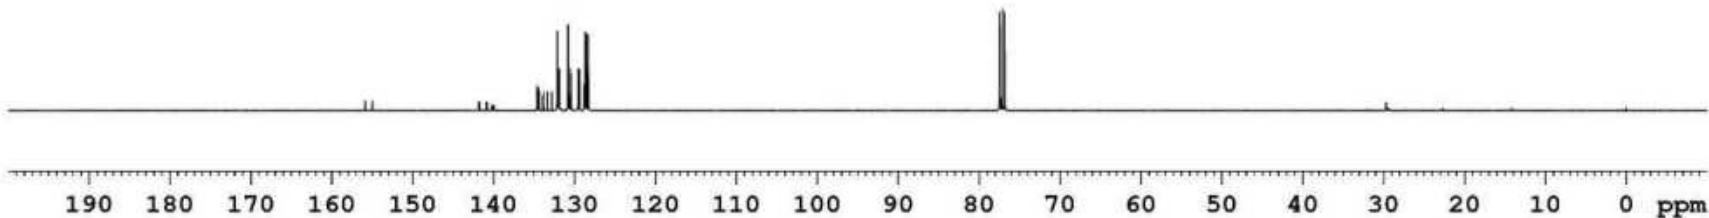

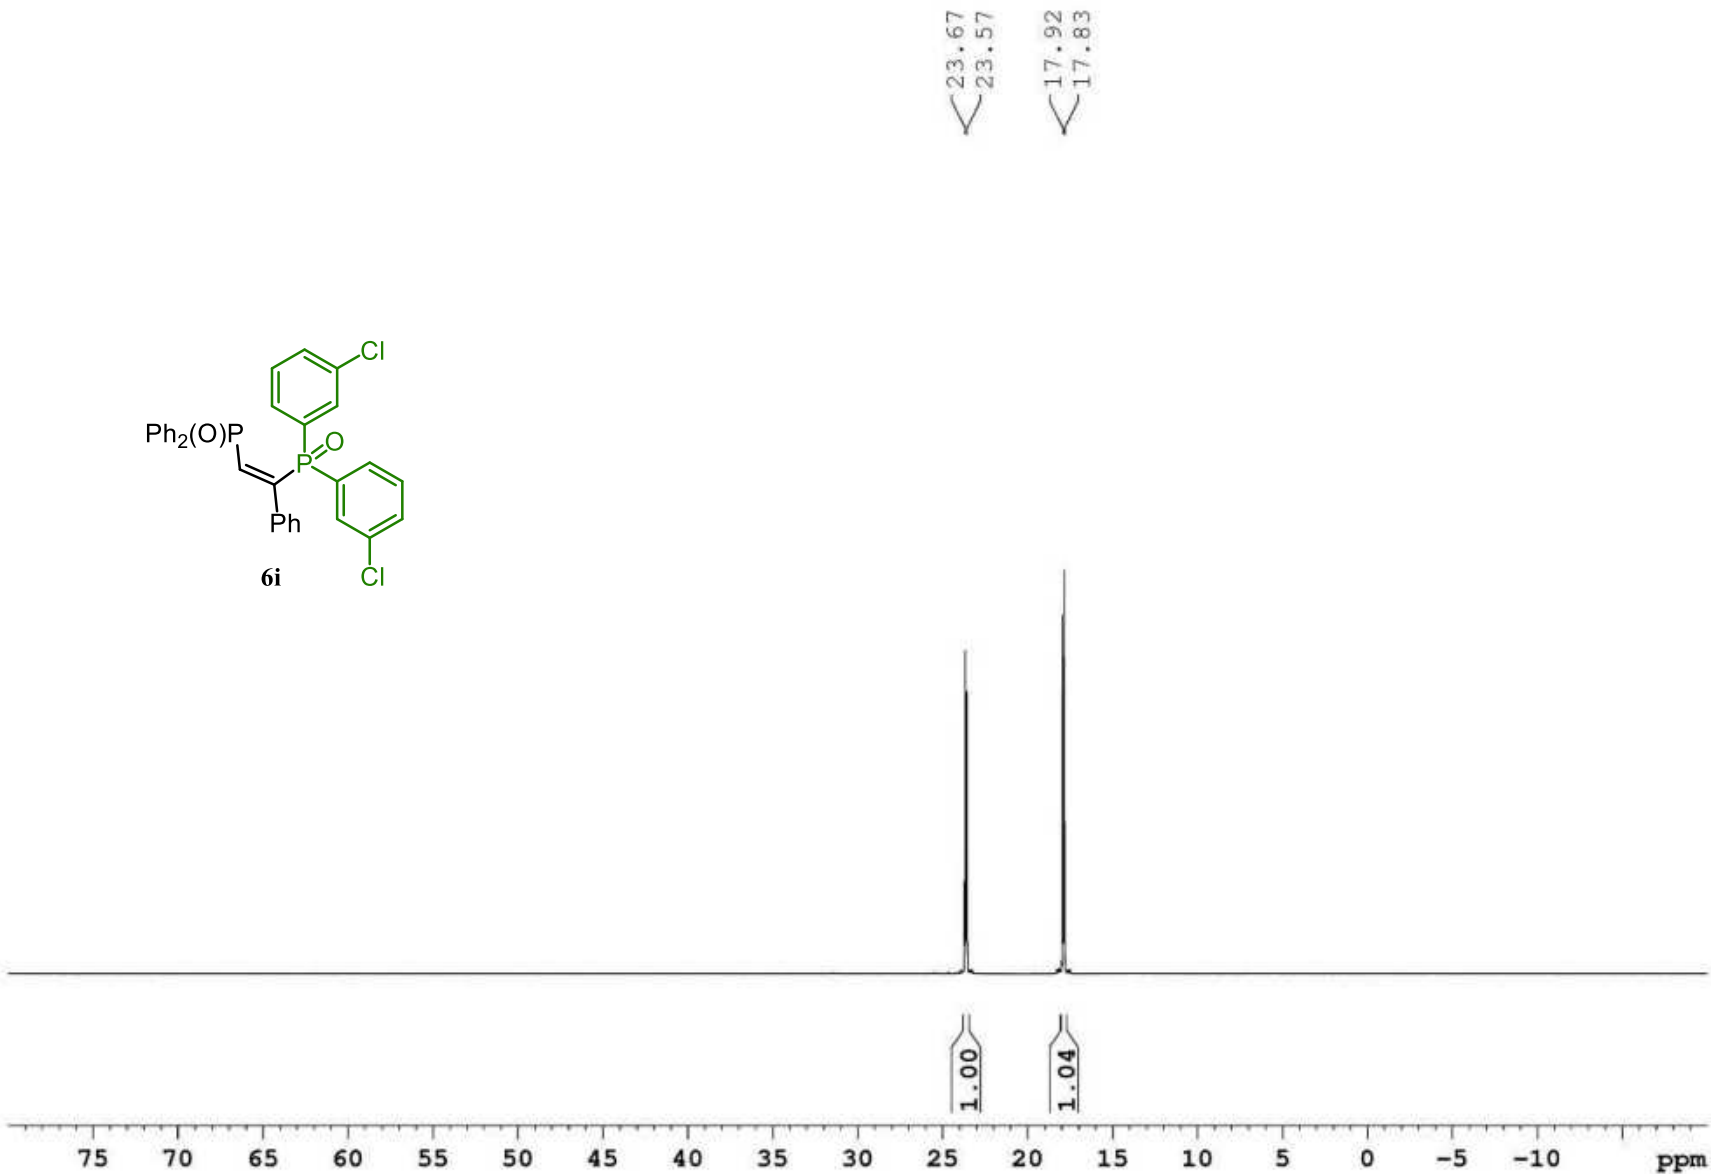

7.68  
7.66  
7.65  
7.63  
7.46  
7.45  
7.43  
7.40  
7.40  
7.39  
7.38  
7.37  
7.27  
7.26  
7.25  
7.23  
7.21  
7.19  
7.18  
7.16  
7.14  
7.11  
7.09  
7.06  
7.03  
7.00  
6.70  
6.70  
6.68  
6.68  
5.92

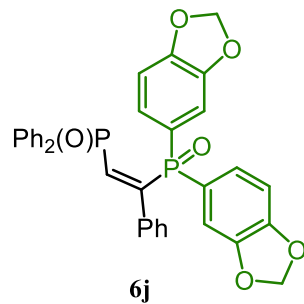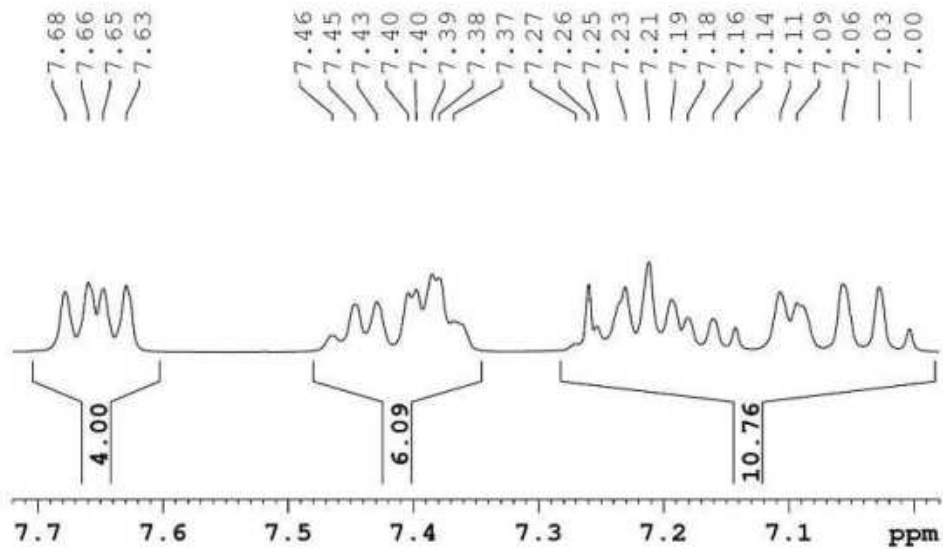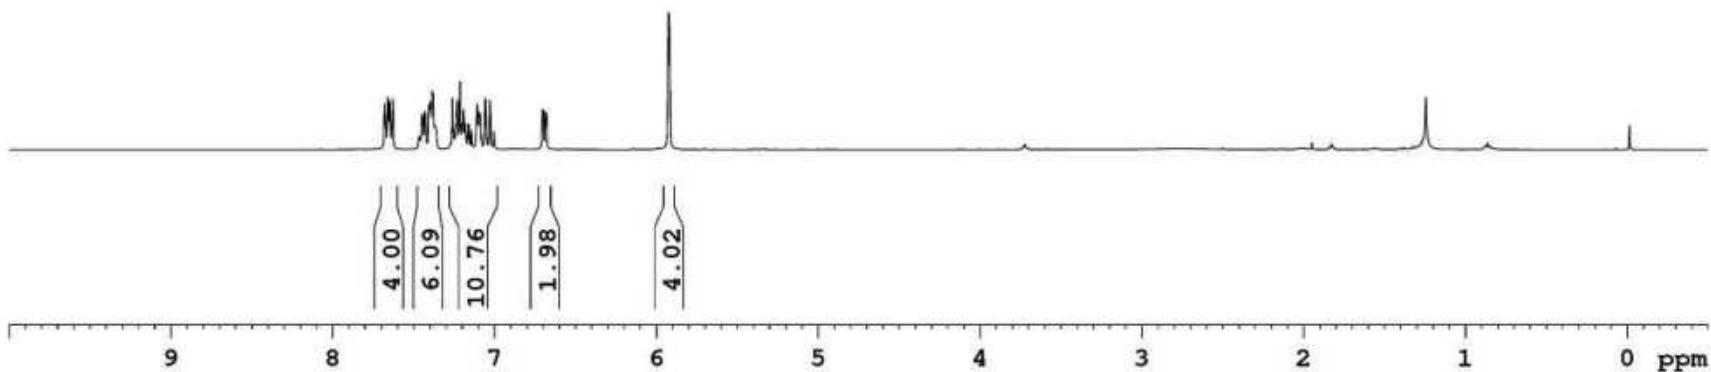

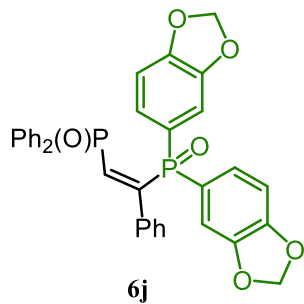

158.19  
 157.34  
 150.88  
 150.85  
 147.57  
 147.38  
 140.70  
 140.66  
 140.61  
 140.56  
 140.50  
 140.40  
 139.78  
 139.69  
 134.83  
 133.76  
 131.51  
 131.48  
 130.76  
 130.67  
 128.59  
 128.48  
 128.41  
 128.36  
 128.30  
 128.23  
 124.56  
 123.46  
 112.04  
 111.91  
 108.36  
 108.21  
 101.51

140.70  
 140.66  
 140.61  
 140.56  
 140.50  
 140.40

139.78  
 139.69

134.83

133.76

131.51  
 131.48  
 130.76  
 130.67

128.59  
 128.48  
 128.41  
 128.36  
 128.30  
 128.23

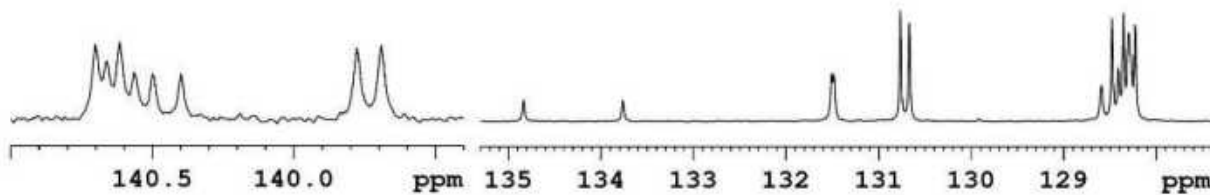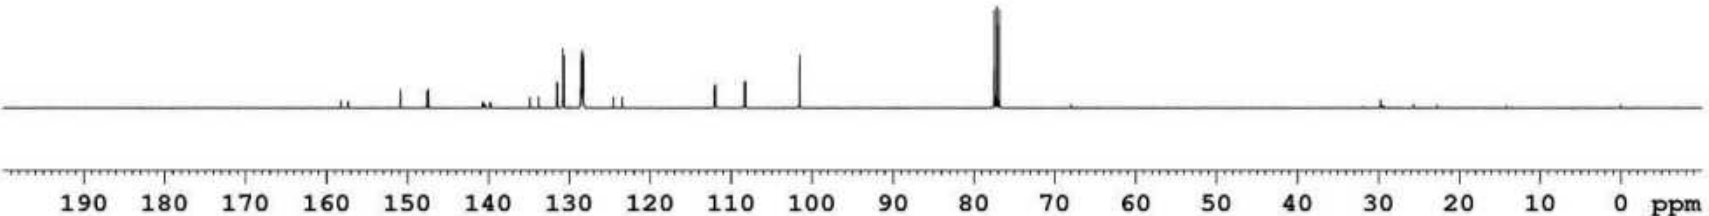

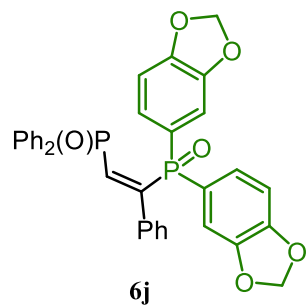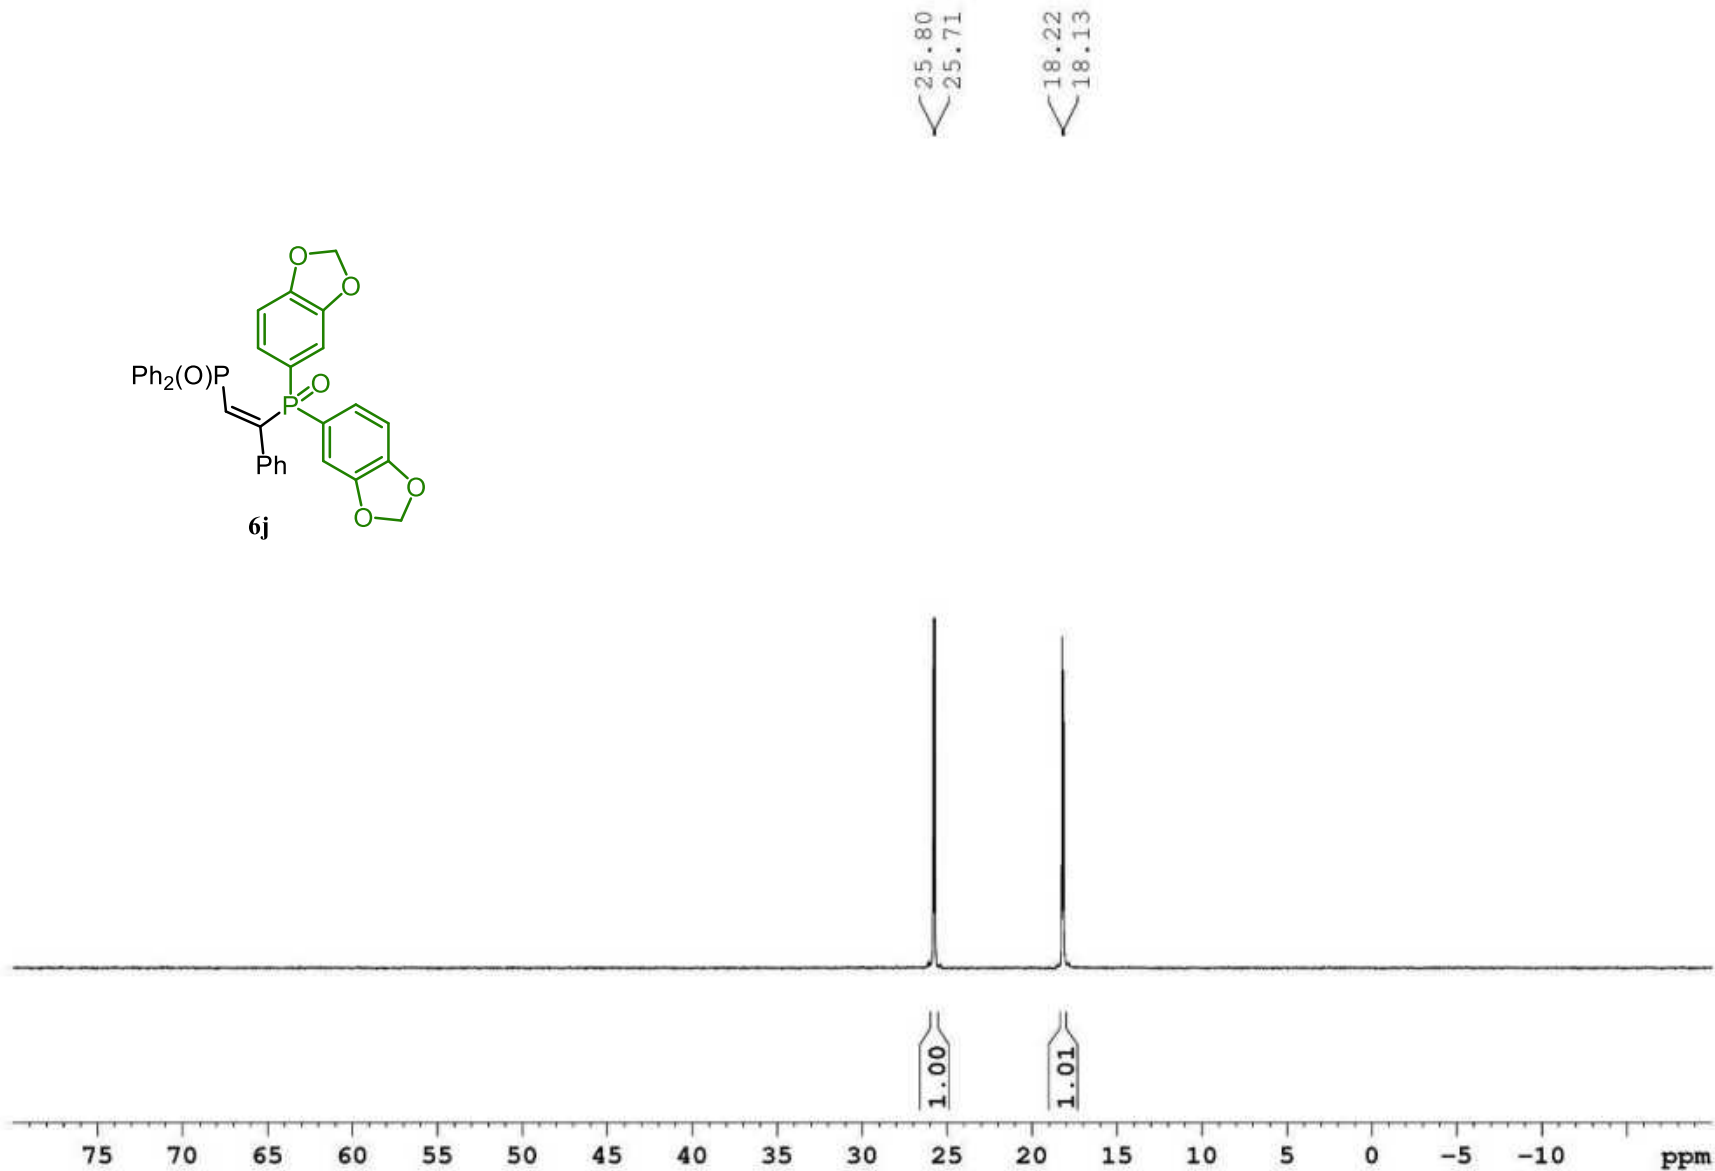

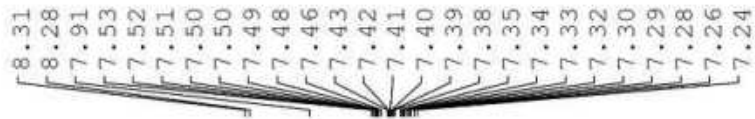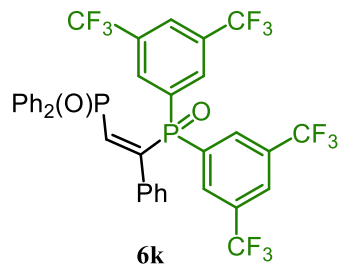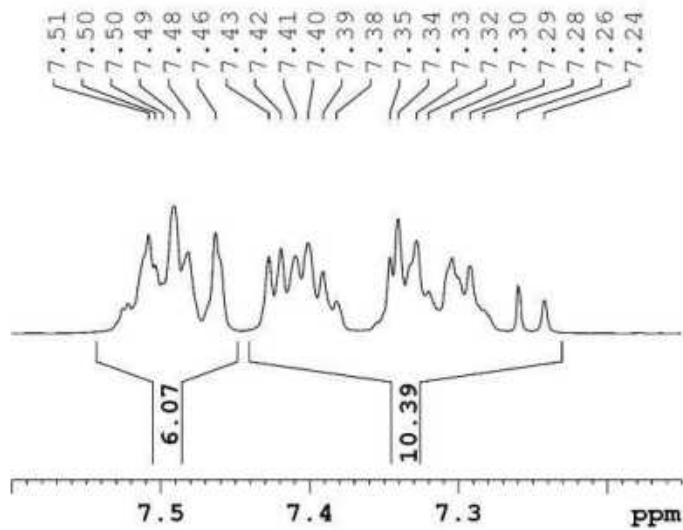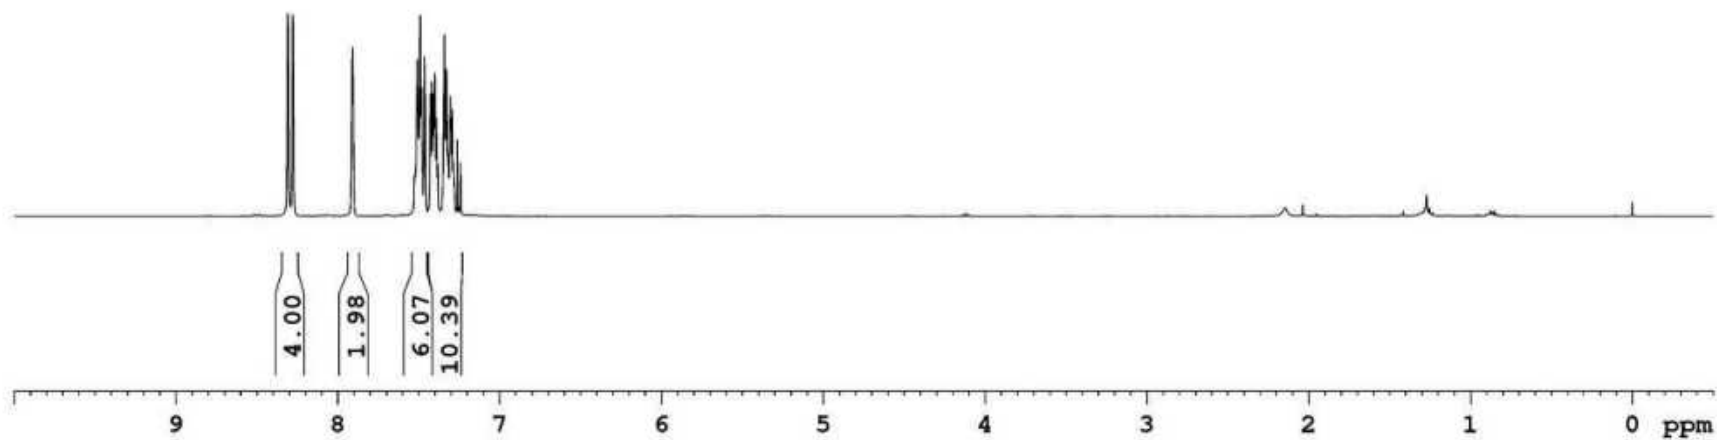

153.99  
153.11  
142.83  
142.73  
141.95  
141.86  
139.25  
139.16  
139.09  
139.00  
135.83  
134.77  
132.49  
132.46  
132.41  
132.38  
132.34  
132.18  
132.05  
131.84  
131.71  
131.50  
131.37  
131.28  
131.17  
131.04  
130.55  
130.45  
129.46  
129.00  
128.87  
128.75  
128.30  
128.26  
126.81  
125.92  
125.89  
125.86  
125.83  
124.10  
121.38  
118.66

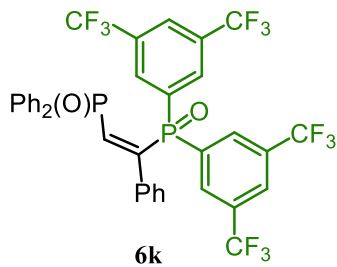

132.49  
132.46  
132.41  
132.38  
132.34  
132.18  
132.05  
131.84  
131.71  
131.50  
131.37  
131.28  
131.17  
131.04  
130.55  
130.45

129.46  
129.00  
128.87  
128.75  
128.30  
128.26

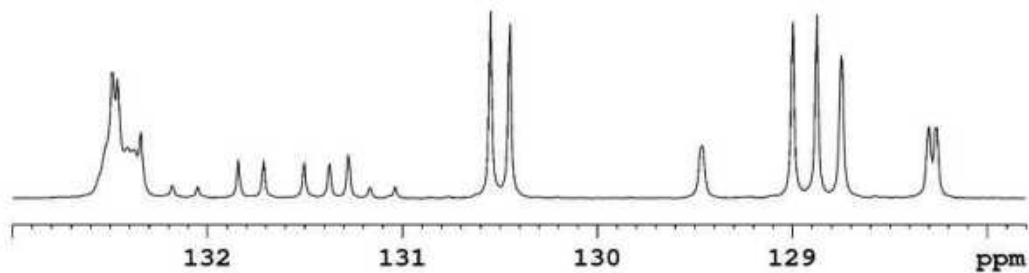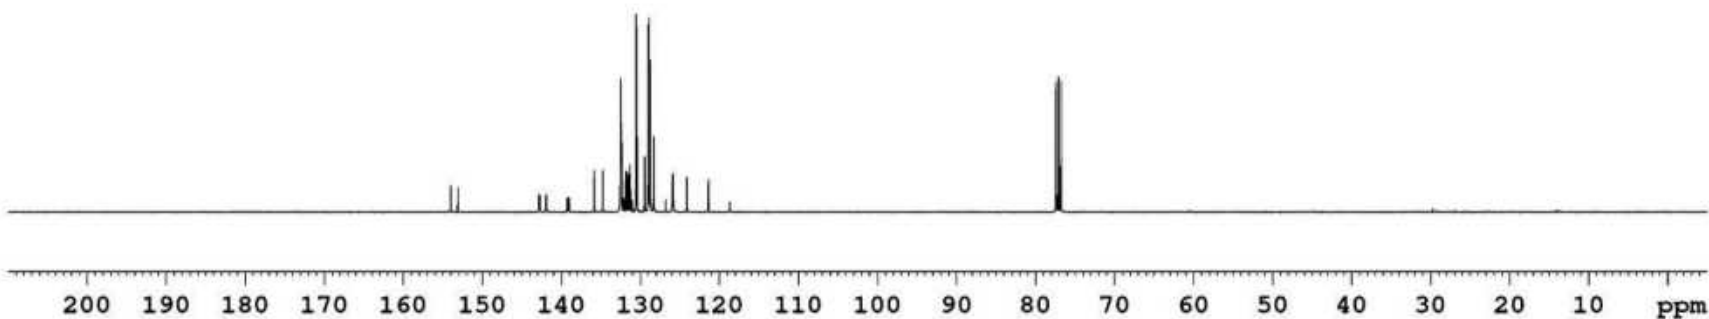



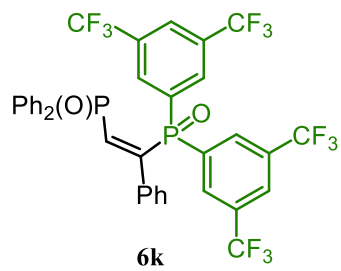

23.81  
23.72

18.66  
18.57

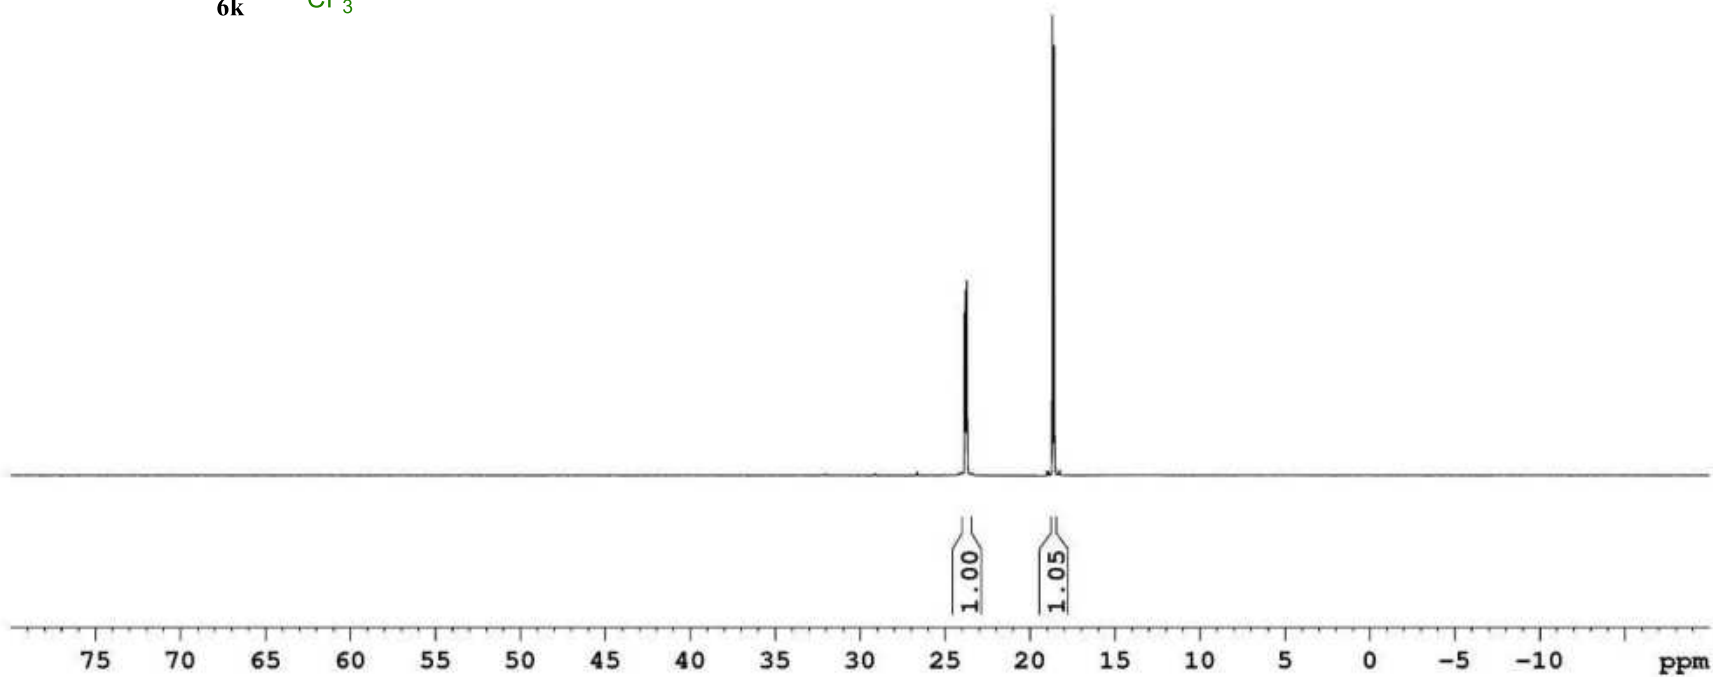

7.69  
7.67  
7.67  
7.66  
7.64  
7.64  
7.45  
7.45  
7.43  
7.43  
7.42  
7.41  
7.41  
7.38  
7.37  
7.36  
7.35  
7.34  
7.34  
7.33  
7.32  
7.30  
7.26  
7.24  
7.24  
7.23  
7.22  
7.21  
7.19  
7.17  
7.17  
7.14  
7.11  
7.10  
7.09  
7.05  
7.04  
7.04  
7.03  
7.02  
7.01

2.21  
2.11

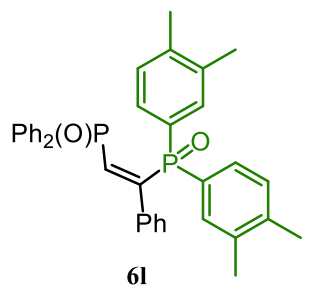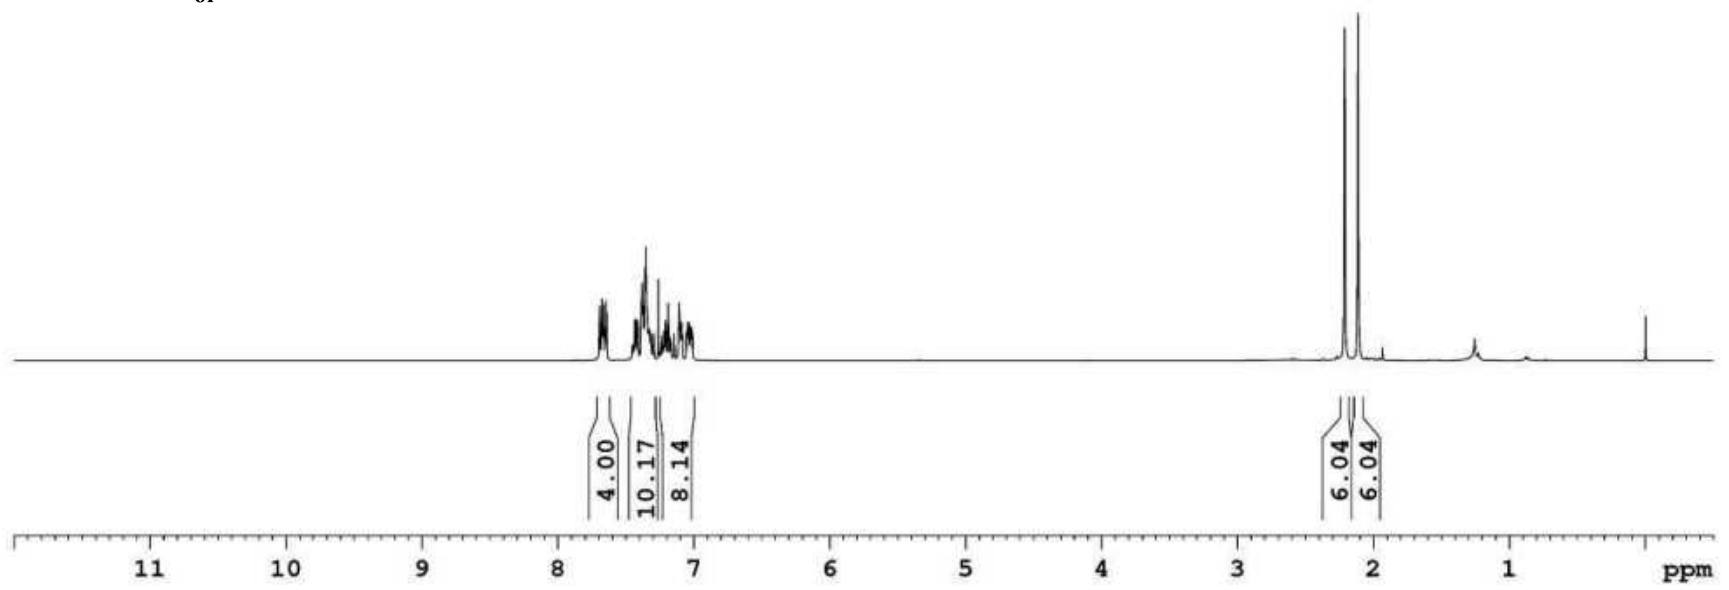

158.22  
157.40  
140.92  
140.89  
140.86  
140.76  
140.66  
140.57  
139.72  
139.64  
136.47  
136.34  
135.10  
134.02  
133.46  
133.36  
131.21  
131.19  
130.94  
130.84  
130.32  
130.21  
129.28  
129.14  
128.90  
128.50  
128.47  
128.35  
128.25  
128.13  
128.03  
127.83

19.94  
19.68

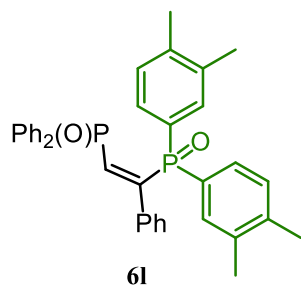

136.47  
136.34

135.10

134.02

133.46  
133.36

131.21

131.19

130.94

130.84

130.32

130.21

129.28

129.14

128.90

128.50

128.47

128.35

128.25

128.13

128.03

127.83

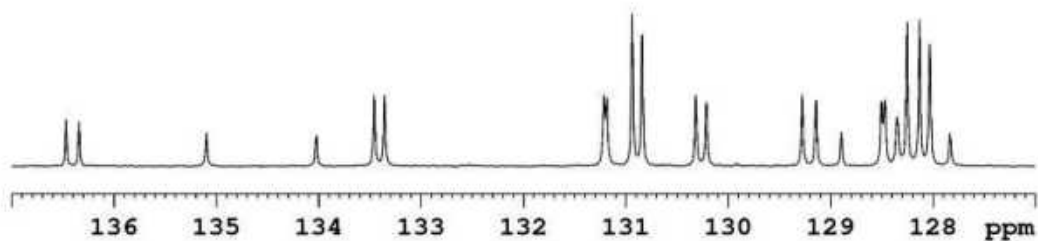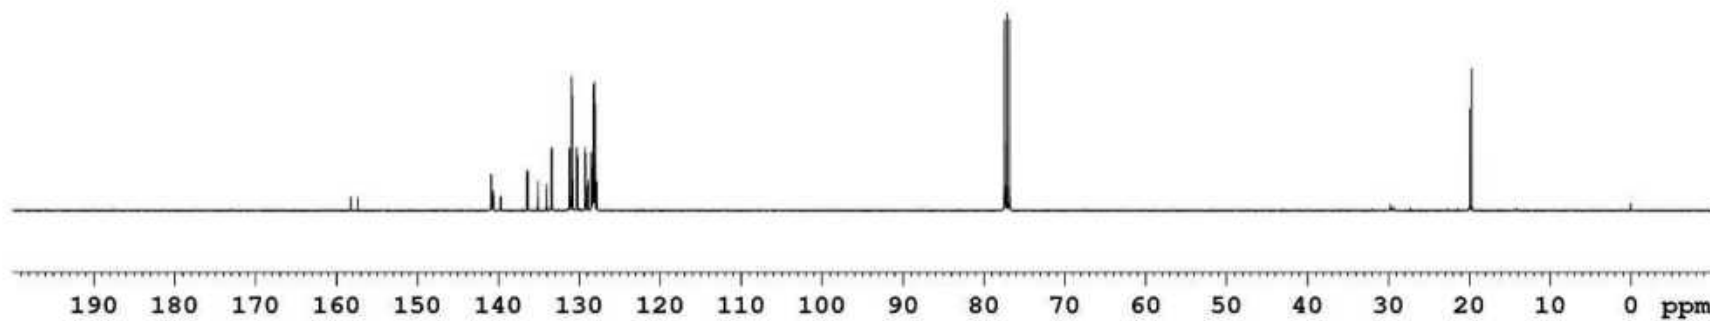

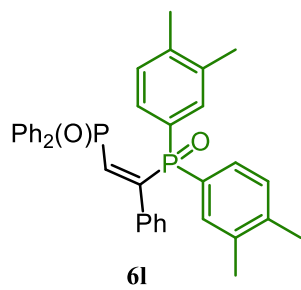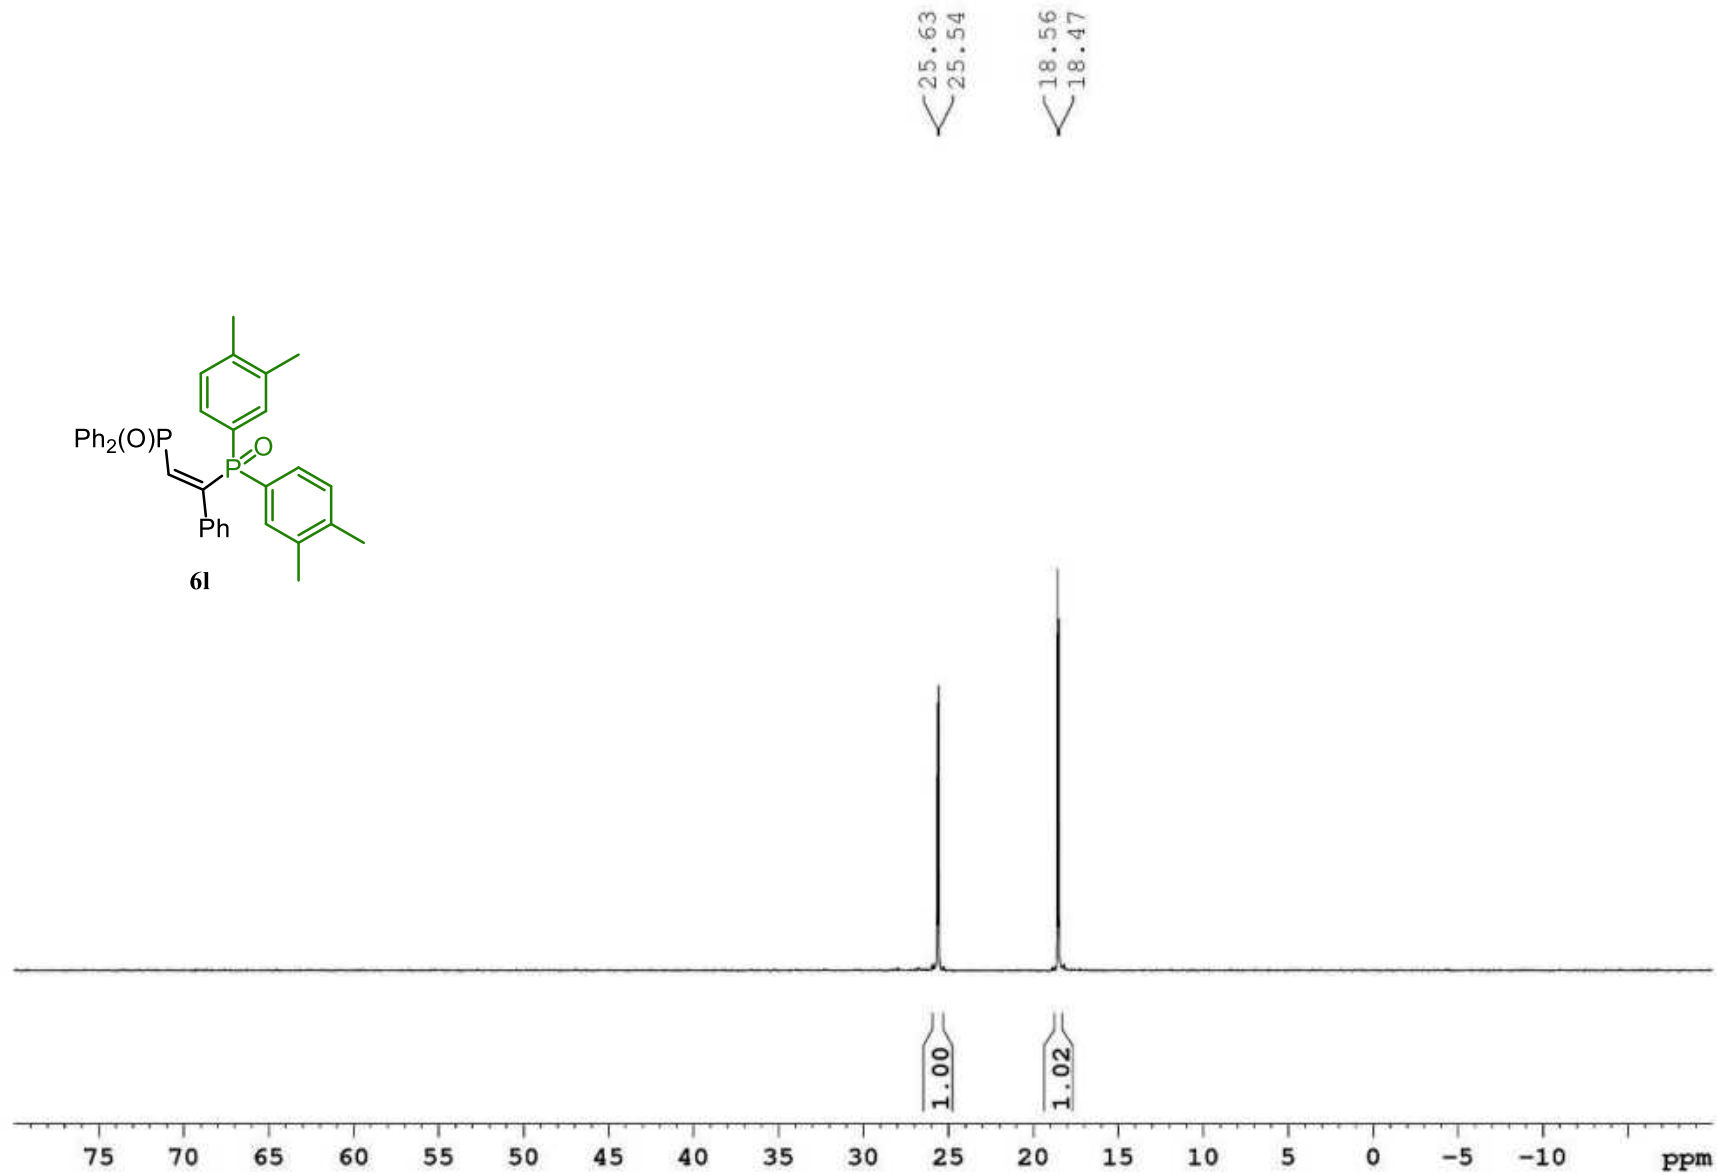

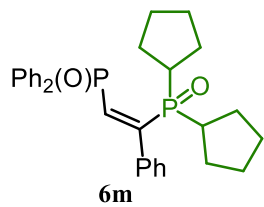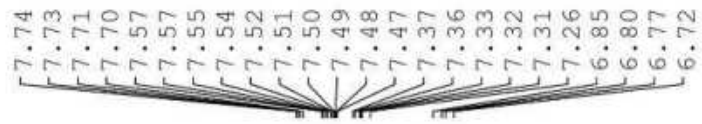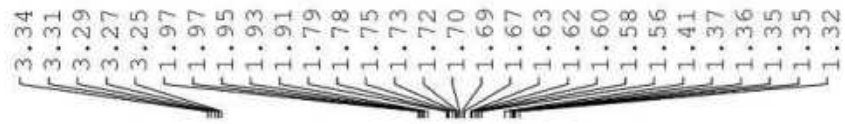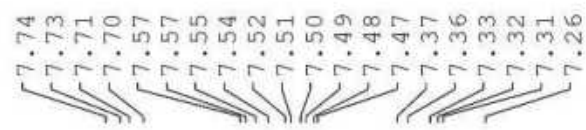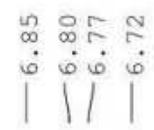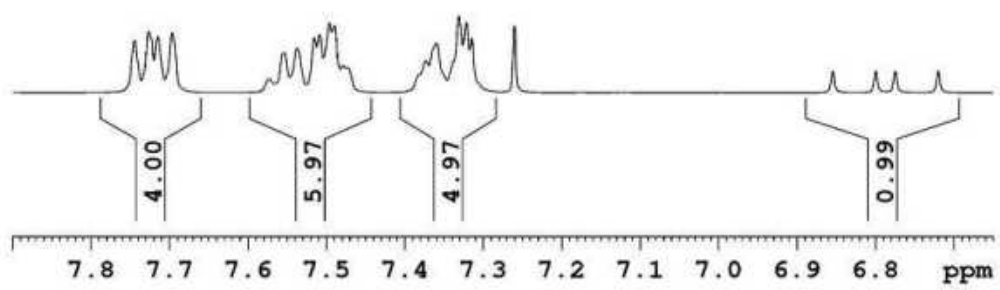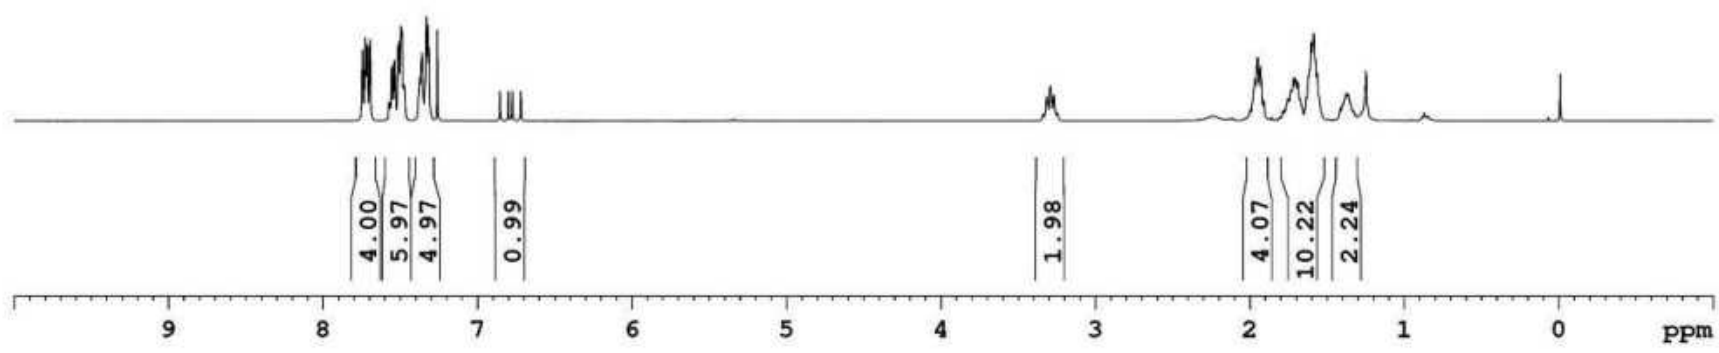

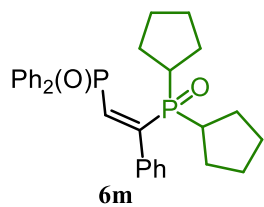

160.91  
 160.89  
 160.26  
 160.24  
 141.96  
 141.91  
 141.78  
 141.73  
 134.05  
 133.95  
 133.73  
 133.11  
 133.01  
 132.67  
 132.19  
 132.17  
 130.96  
 130.87  
 129.01  
 128.89  
 128.69  
 128.67  
 128.48  
 127.92

39.88  
 39.20  
 27.69  
 27.67  
 26.73  
 26.62  
 26.31  
 25.89  
 25.78

134.05  
 133.95  
 133.73  
 133.11  
 133.01  
 132.67  
 132.19  
 132.17

130.96  
 130.87

129.01  
 128.89  
 128.69  
 128.67  
 128.48  
 127.92

27.69  
 27.67

26.73  
 26.62  
 26.31

25.89  
 25.78

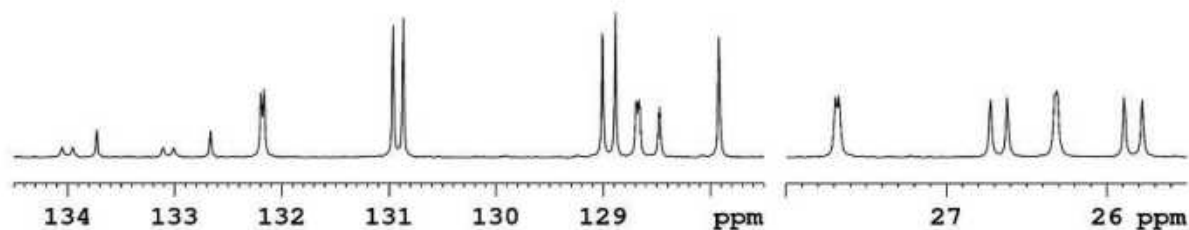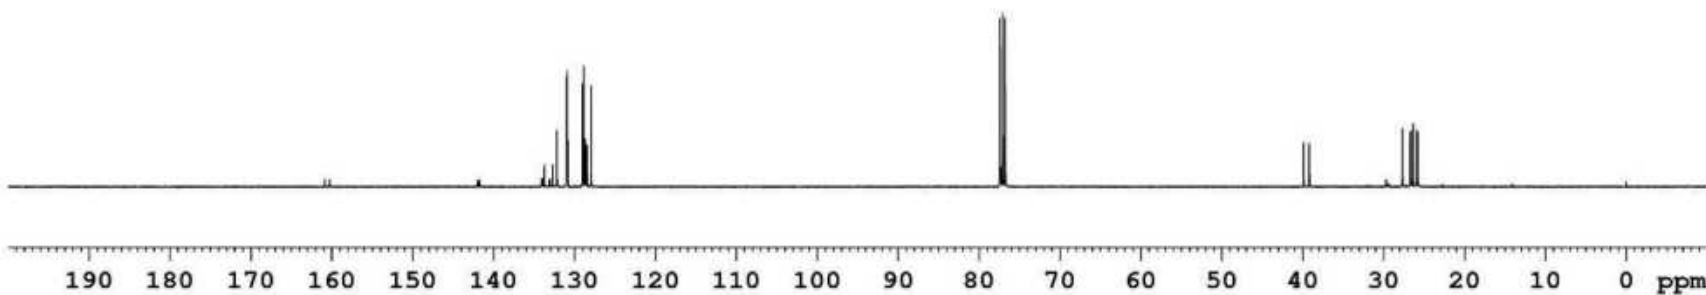

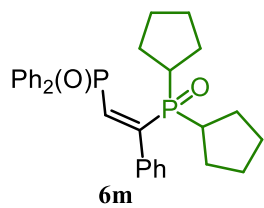

46.98  
46.90

18.62  
18.54

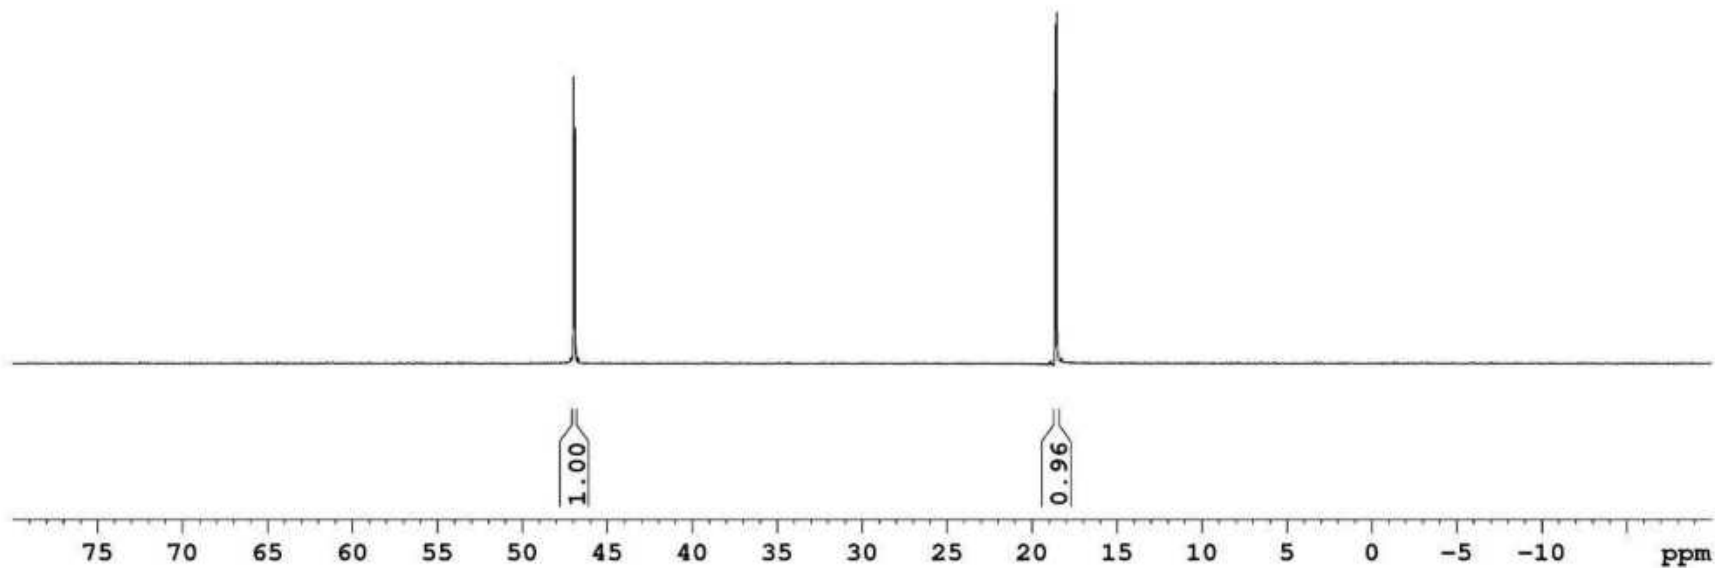

7.74  
7.73  
7.71  
7.70  
7.55  
7.53  
7.52  
7.50  
7.49  
7.48  
7.47  
7.46  
7.46  
7.34  
7.33  
7.31  
7.30  
7.29  
7.29  
7.26  
6.90  
6.85  
6.82  
6.77  
2.97  
2.96  
2.94  
2.93  
2.92  
2.90  
2.89  
2.08  
2.05  
1.76  
1.74  
1.63  
1.62  
1.61  
1.60  
1.58  
1.58  
1.55  
1.50  
1.49  
1.48  
1.47  
1.46  
1.33  
1.30  
1.27  
1.23  
1.19  
1.16  
1.15  
1.12  
1.11  
1.09  
0.98

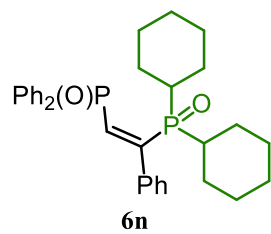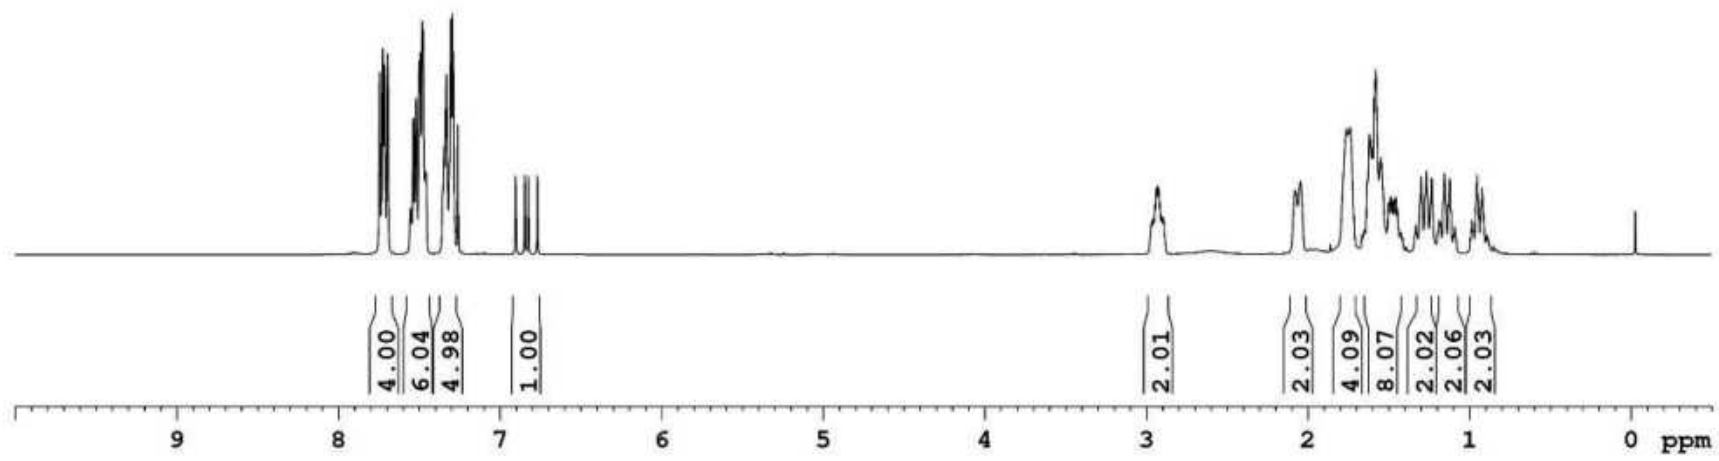



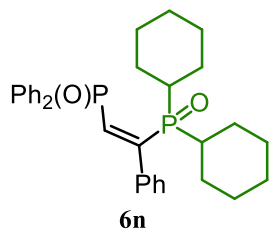

158.90  
158.89  
158.29  
158.28  
141.90  
141.84  
141.72  
141.66  
134.47  
134.38  
133.72  
133.72  
133.53  
133.44  
132.66  
132.21  
132.18  
130.91  
130.81  
129.04  
128.92  
128.86  
128.84  
128.48  
127.88

39.53  
38.90  
26.57  
26.54  
26.37  
26.34  
26.30  
26.20  
26.17  
25.70

134.47  
134.38  
133.72  
133.53  
133.44  
132.66  
132.21  
132.18

130.91  
130.81

129.04  
128.92  
128.86  
128.84  
128.48  
127.88

26.57  
26.54  
26.37  
26.34  
26.30  
26.20  
26.17

25.70

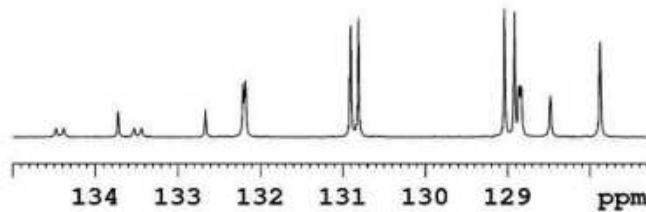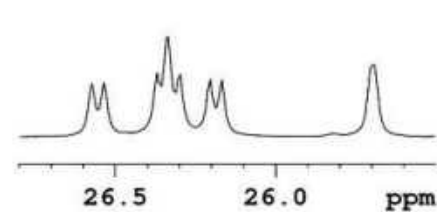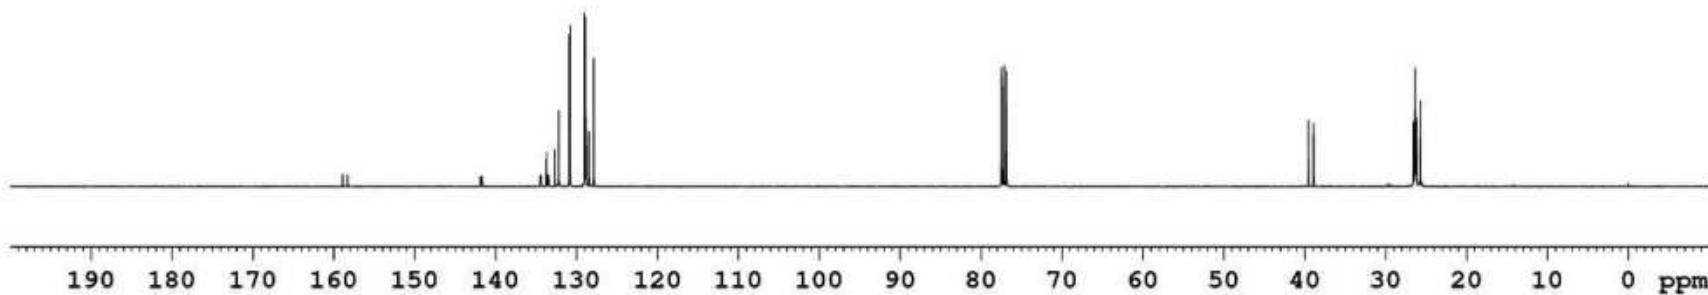

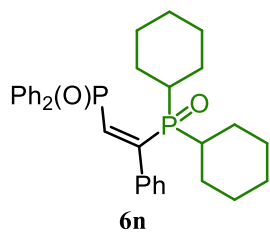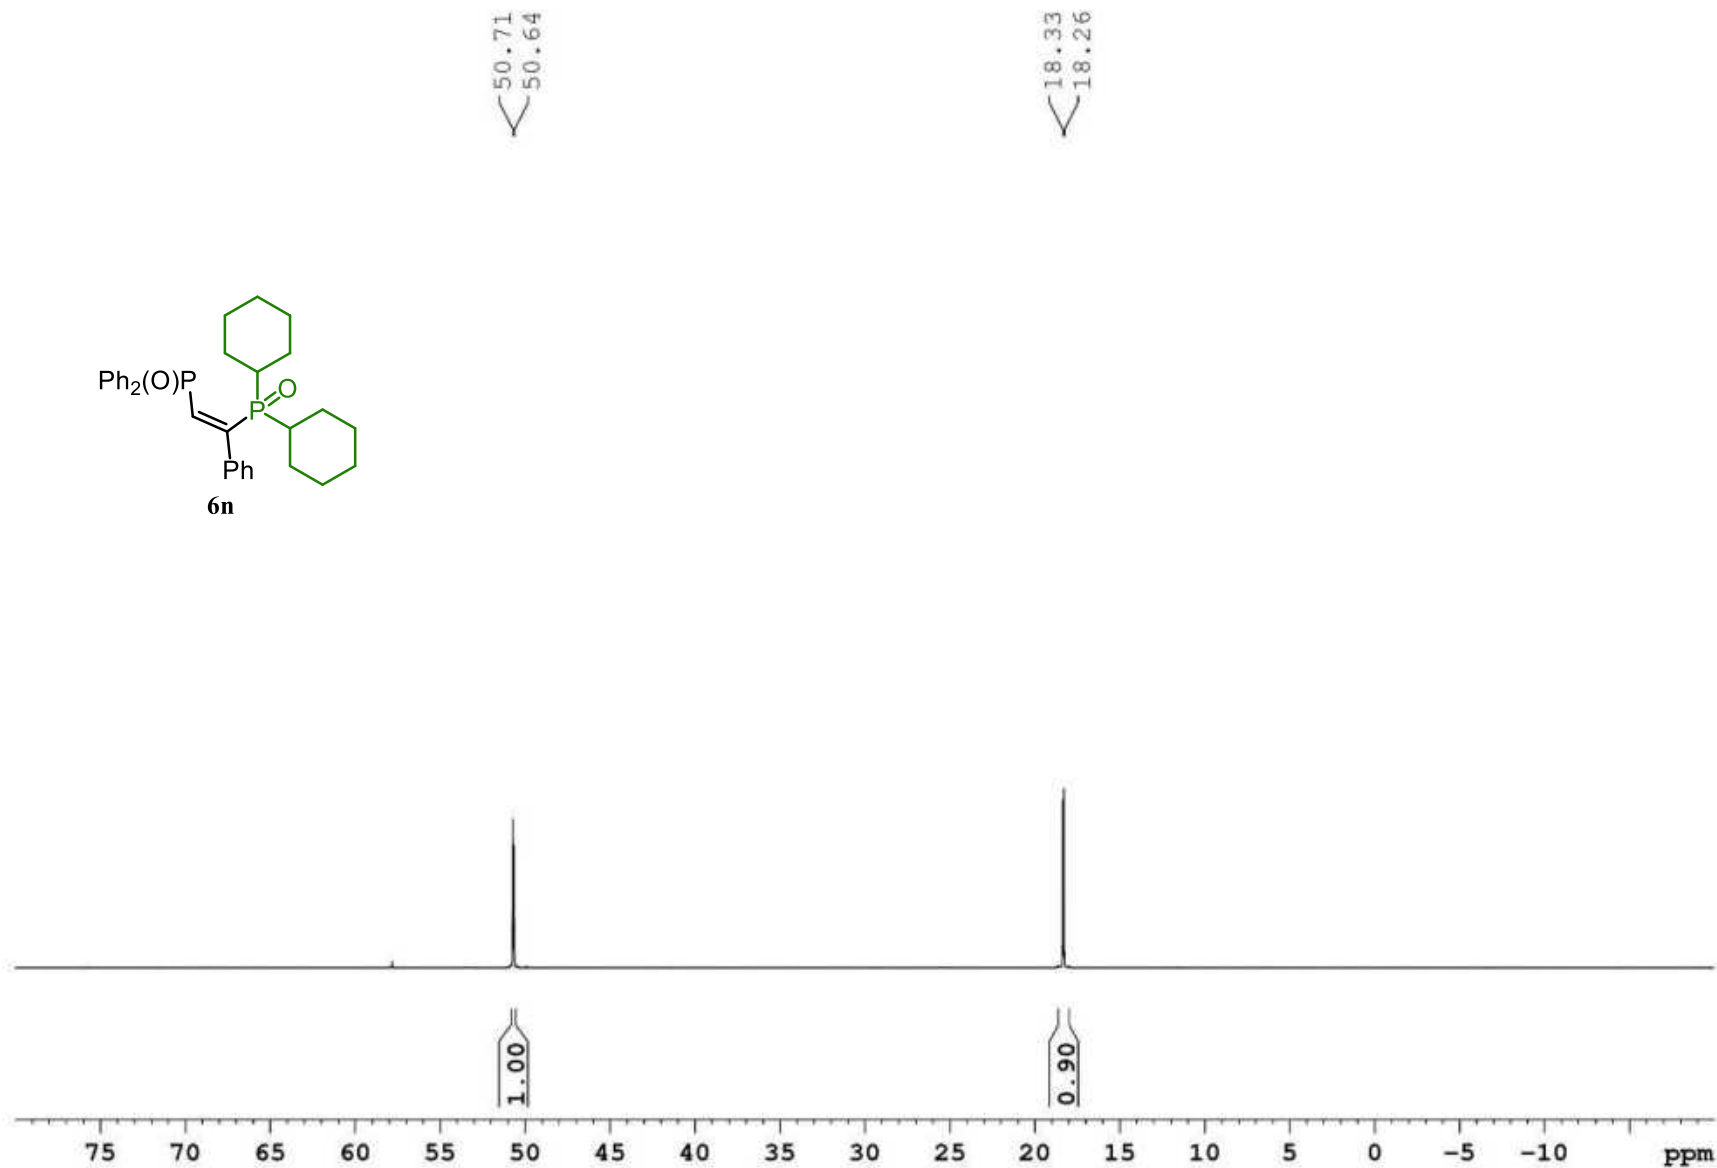

7.74  
7.72  
7.71  
7.71  
7.69  
7.68  
7.53  
7.53  
7.52  
7.51  
7.51  
7.49  
7.48  
7.48  
7.47  
7.47  
7.46  
7.45  
7.45  
7.45  
7.44  
7.36  
7.35  
7.34  
7.33  
7.32  
7.32  
7.31  
7.31  
7.26  
6.89  
6.84  
6.81  
6.75  
2.62  
2.59  
2.28  
2.27  
2.25  
2.24  
2.23  
1.67  
1.66  
1.42  
1.29  
1.27  
1.25  
1.23  
1.23  
1.22  
1.20  
1.19  
1.18  
1.17  
1.17  
0.79  
0.77  
0.75

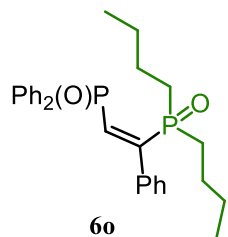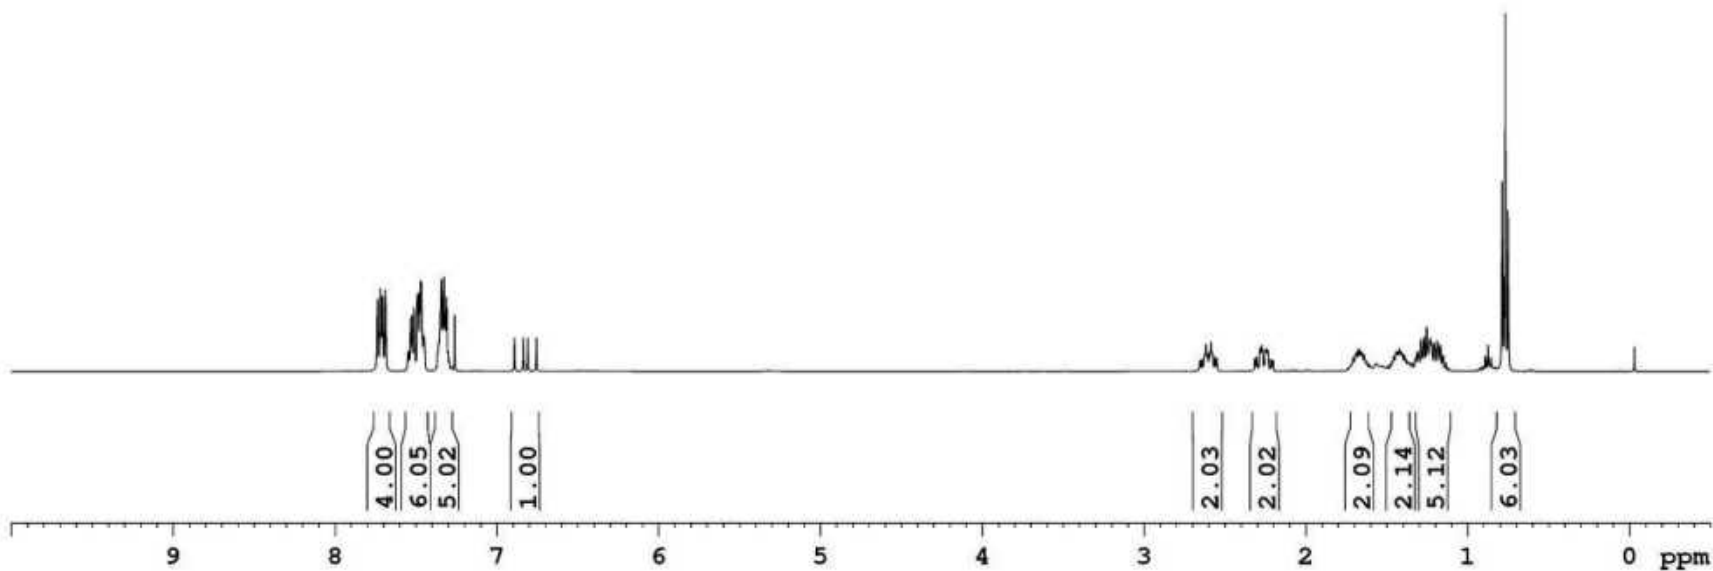



159.36  
 159.35  
 158.70  
 158.68  
 141.53  
 141.47  
 141.36  
 141.29  
 135.16  
 135.06  
 134.22  
 134.12  
 133.67  
 132.61  
 132.22  
 132.20  
 130.95  
 130.86  
 129.00  
 128.88  
 128.61  
 128.52  
 128.50  
 128.04

31.38  
 30.72  
 24.17  
 24.01  
 23.91  
 23.86  
 13.64

135.16  
 135.06  
 134.22  
 134.12  
 133.67  
 132.61  
 132.22  
 132.20  
 130.95  
 130.86  
 129.00  
 128.88  
 128.61  
 128.52  
 128.50  
 128.04

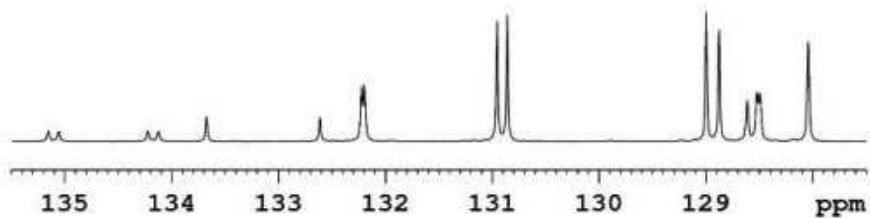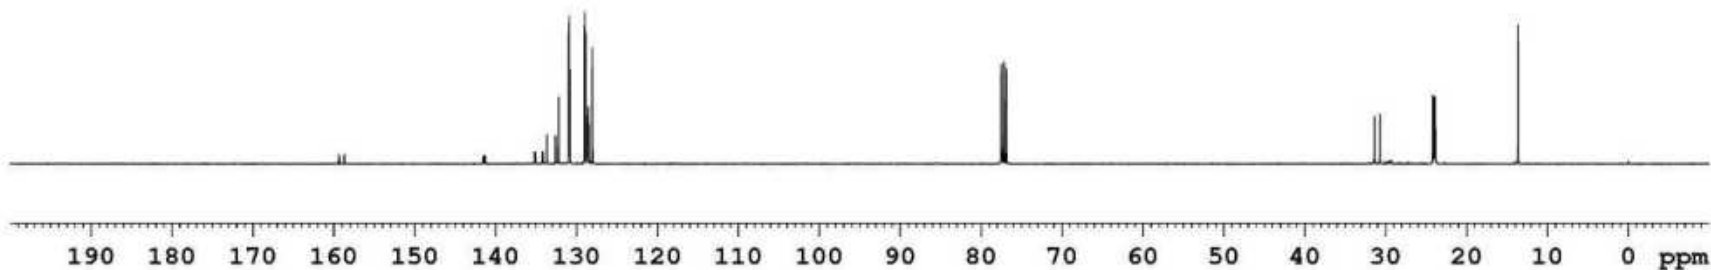

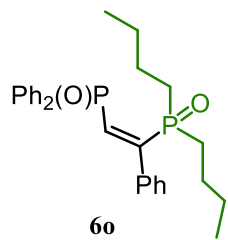

44.20  
44.13

18.48  
18.40

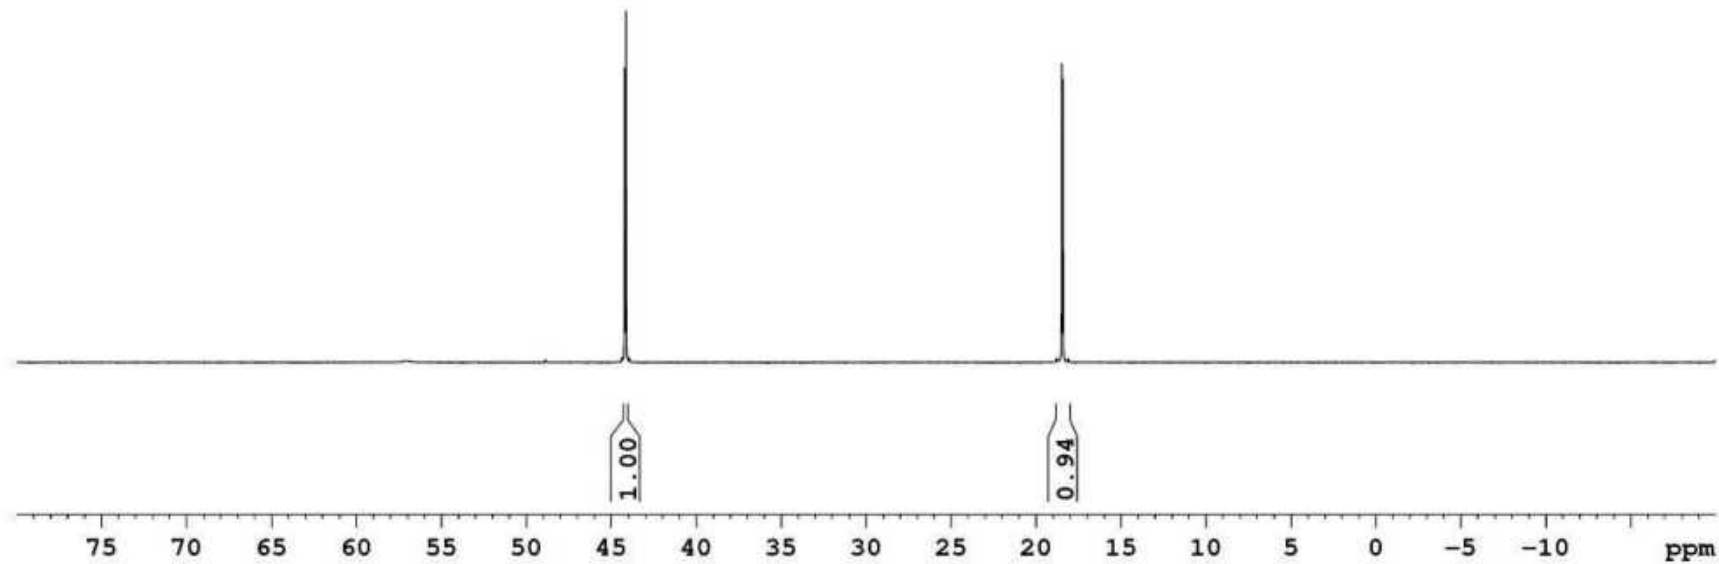

7.73  
7.68  
7.68  
7.55  
7.55  
7.50  
7.49  
7.48  
7.47  
7.45  
7.38  
7.37  
7.31  
7.30  
7.28  
7.26  
6.92  
6.86  
6.84  
6.78

3.21  
3.19  
3.17  
3.16  
3.14  
3.12

1.32  
1.30  
1.28  
1.26  
1.13  
1.11  
1.09  
1.07

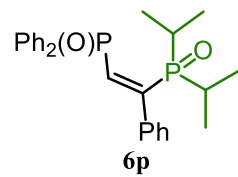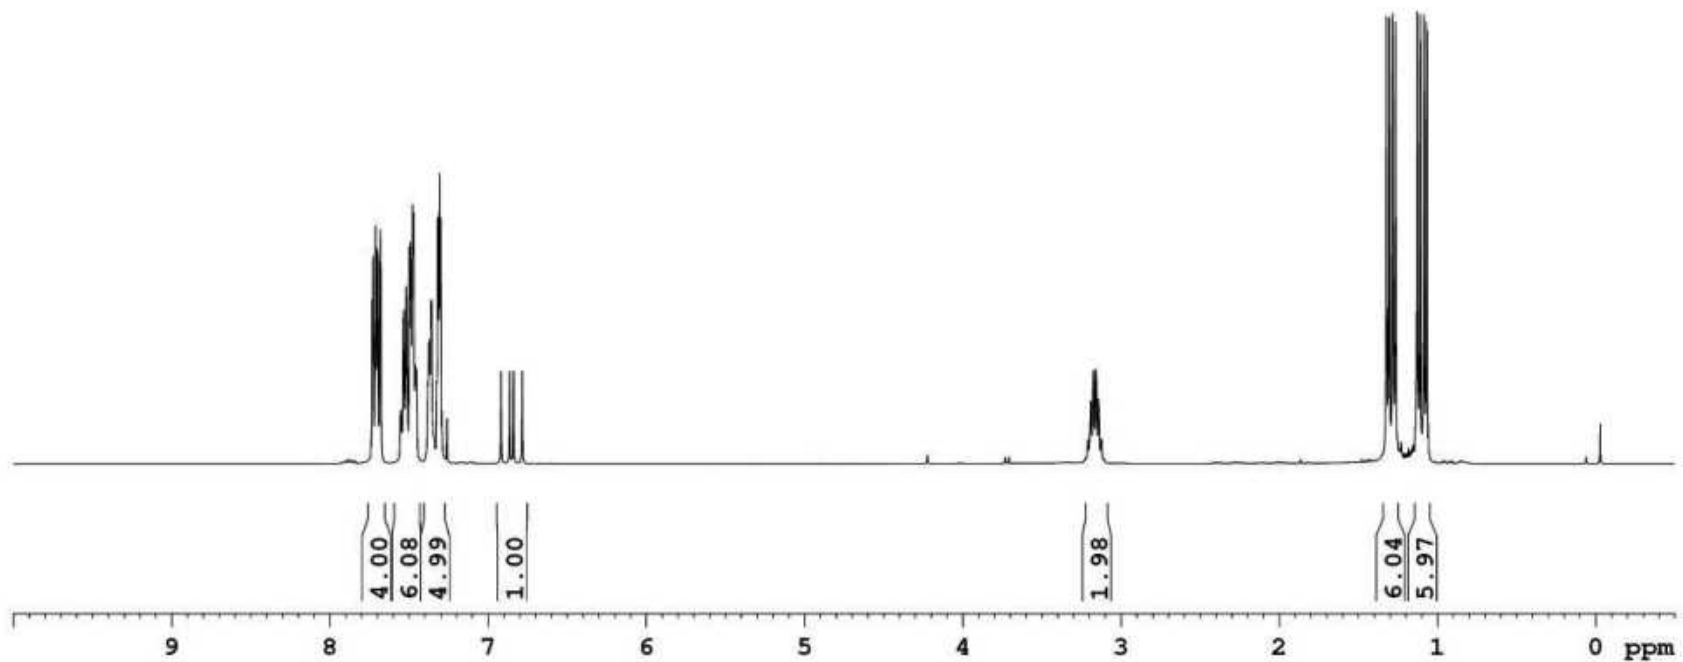



159.21  
158.58  
141.80  
141.74  
141.62  
141.56  
134.72  
134.63  
133.78  
133.69  
133.48  
132.41  
132.25  
132.23  
131.00  
130.90  
129.05  
128.93  
128.76  
128.74  
128.61  
127.98

29.54  
28.91  
17.56  
17.52  
16.57  
16.53

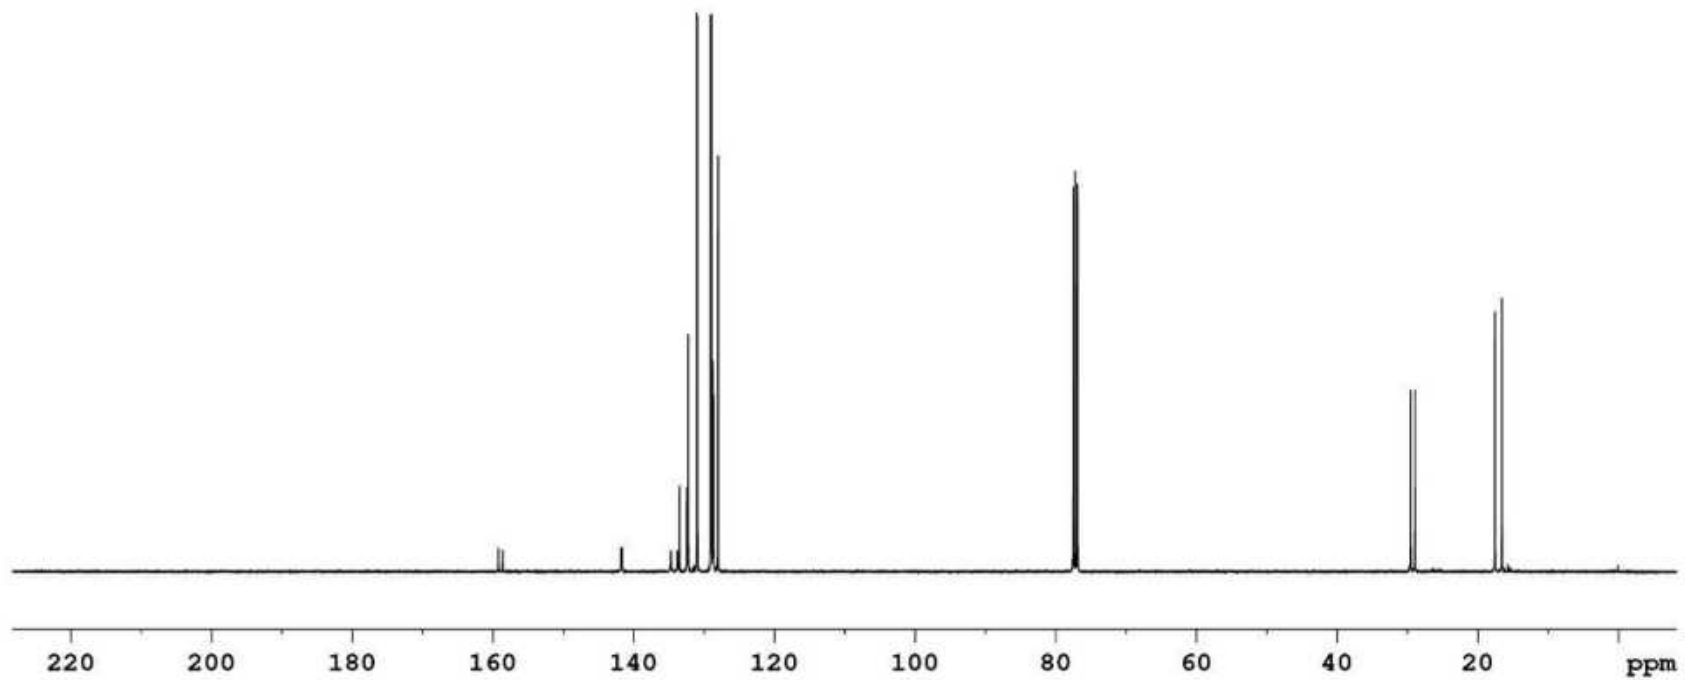

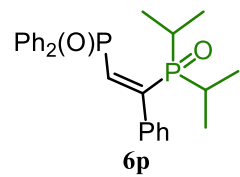

— 54.88

< 19.08  
19.00

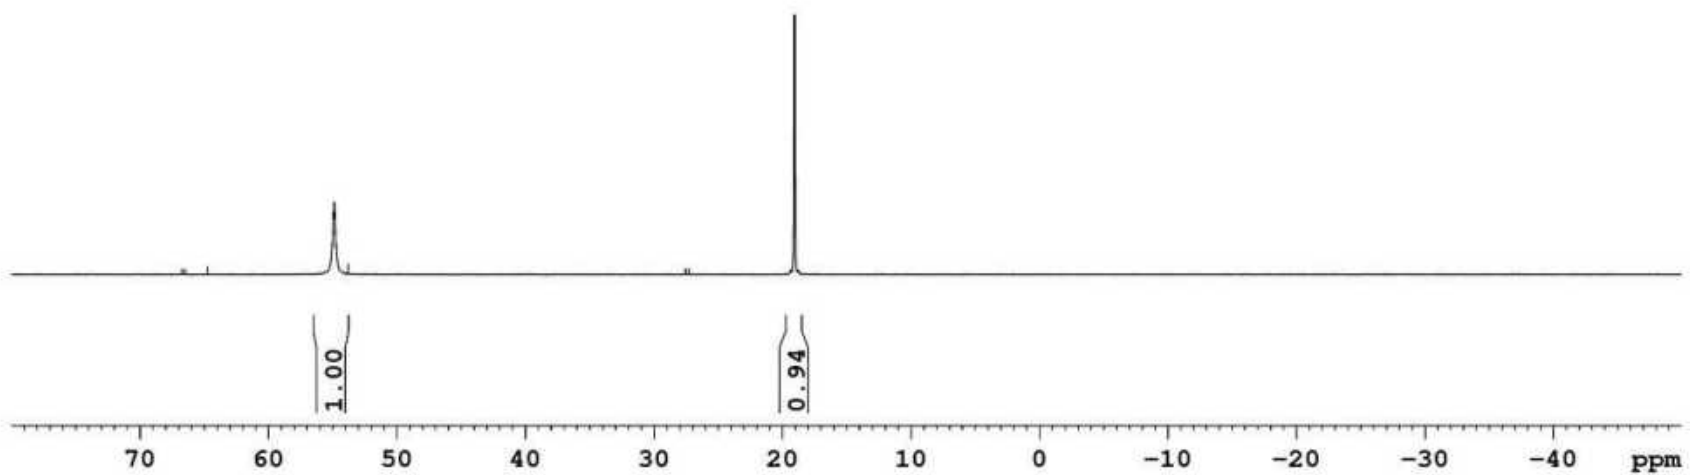



7.80  
7.78  
7.78  
7.77  
7.75  
7.75  
7.71  
7.69  
7.69  
7.68  
7.66  
7.55  
7.54  
7.53  
7.52  
7.50  
7.49  
7.48  
7.47  
7.47  
7.45  
7.45  
7.44  
7.43  
7.41  
7.41  
7.39  
7.39  
7.37  
7.37  
7.35  
7.34  
7.33  
7.32  
7.31  
7.31  
7.30  
7.29  
7.28  
7.27  
7.27  
7.26  
7.16  
7.14  
7.14  
6.93  
6.88  
6.84  
6.79  
1.81  
1.79  
1.77  
1.66  
1.65  
1.64  
1.62  
1.53  
1.51

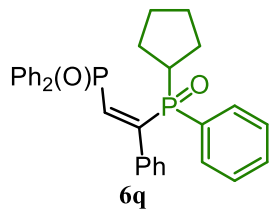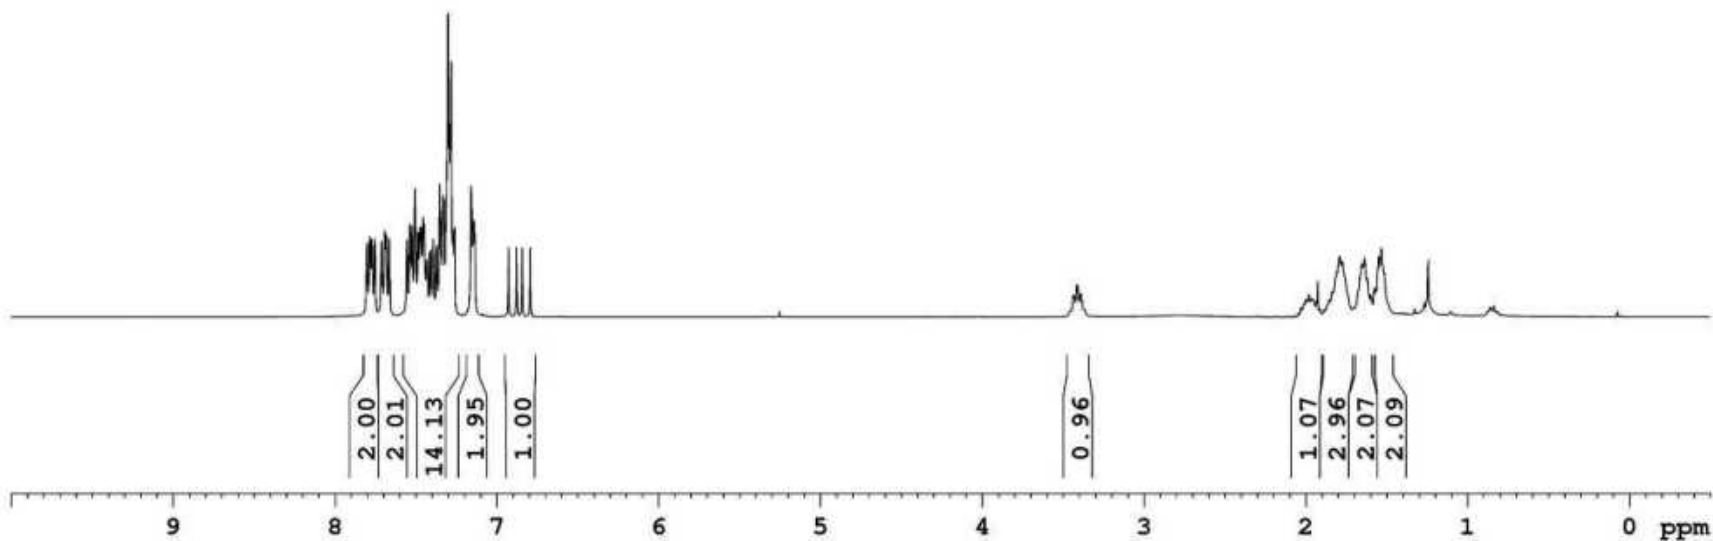

159.24  
158.51  
140.89  
140.80  
140.72  
140.63  
138.88  
138.79  
137.95  
137.86  
135.06  
134.73  
133.99  
133.66  
133.14  
132.18  
132.12  
132.03  
131.65  
131.63  
131.55  
131.53  
131.41  
131.39  
131.00  
130.90  
130.74  
130.65  
128.68  
128.56  
128.47  
128.34  
128.14  
128.03

35.75  
35.01  
27.01  
26.95  
26.93  
26.86  
26.50  
26.39

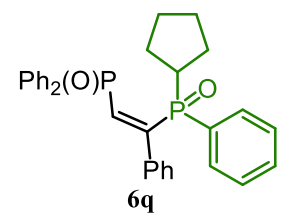

135.06  
134.73  
133.99  
133.66  
133.14  
132.18  
132.12  
132.03  
131.65  
131.63  
131.55  
131.53  
131.41  
131.39  
131.00  
130.90  
130.74  
130.65  
128.68  
128.56  
128.47  
128.34  
128.14  
128.03

27.01  
26.95  
26.93  
26.86

26.50  
26.39

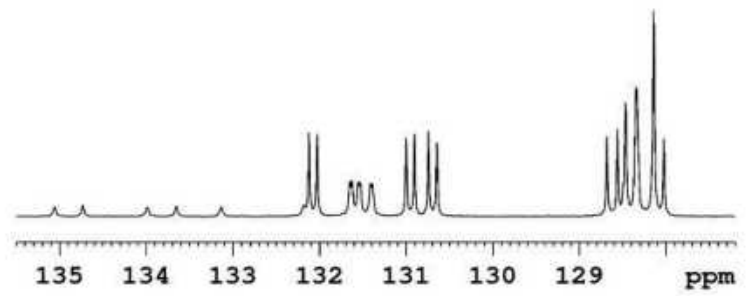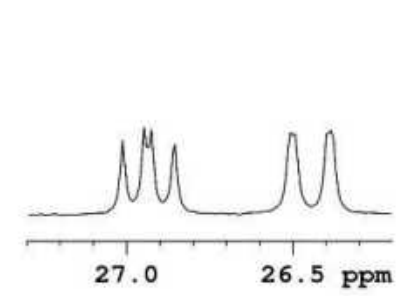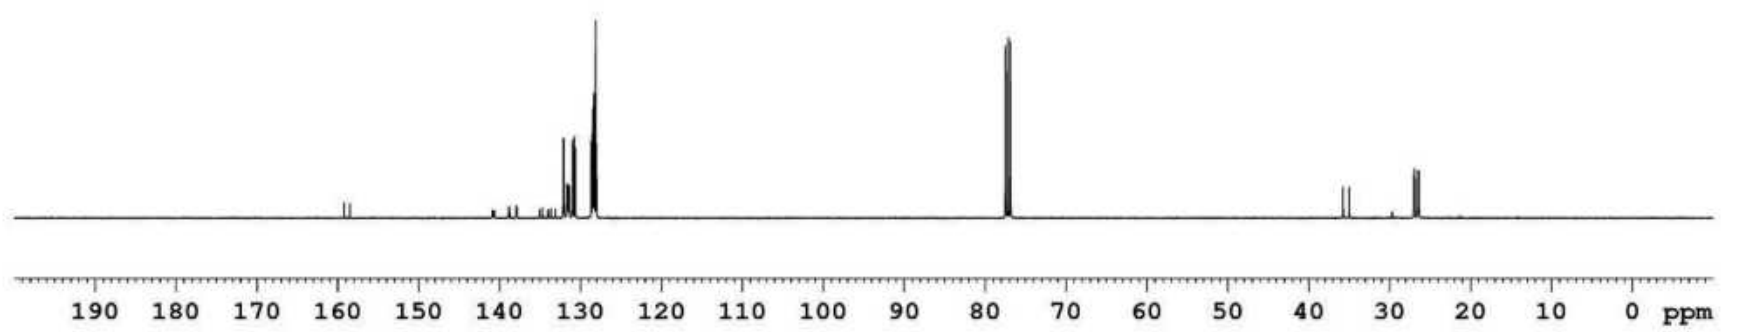

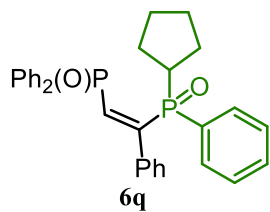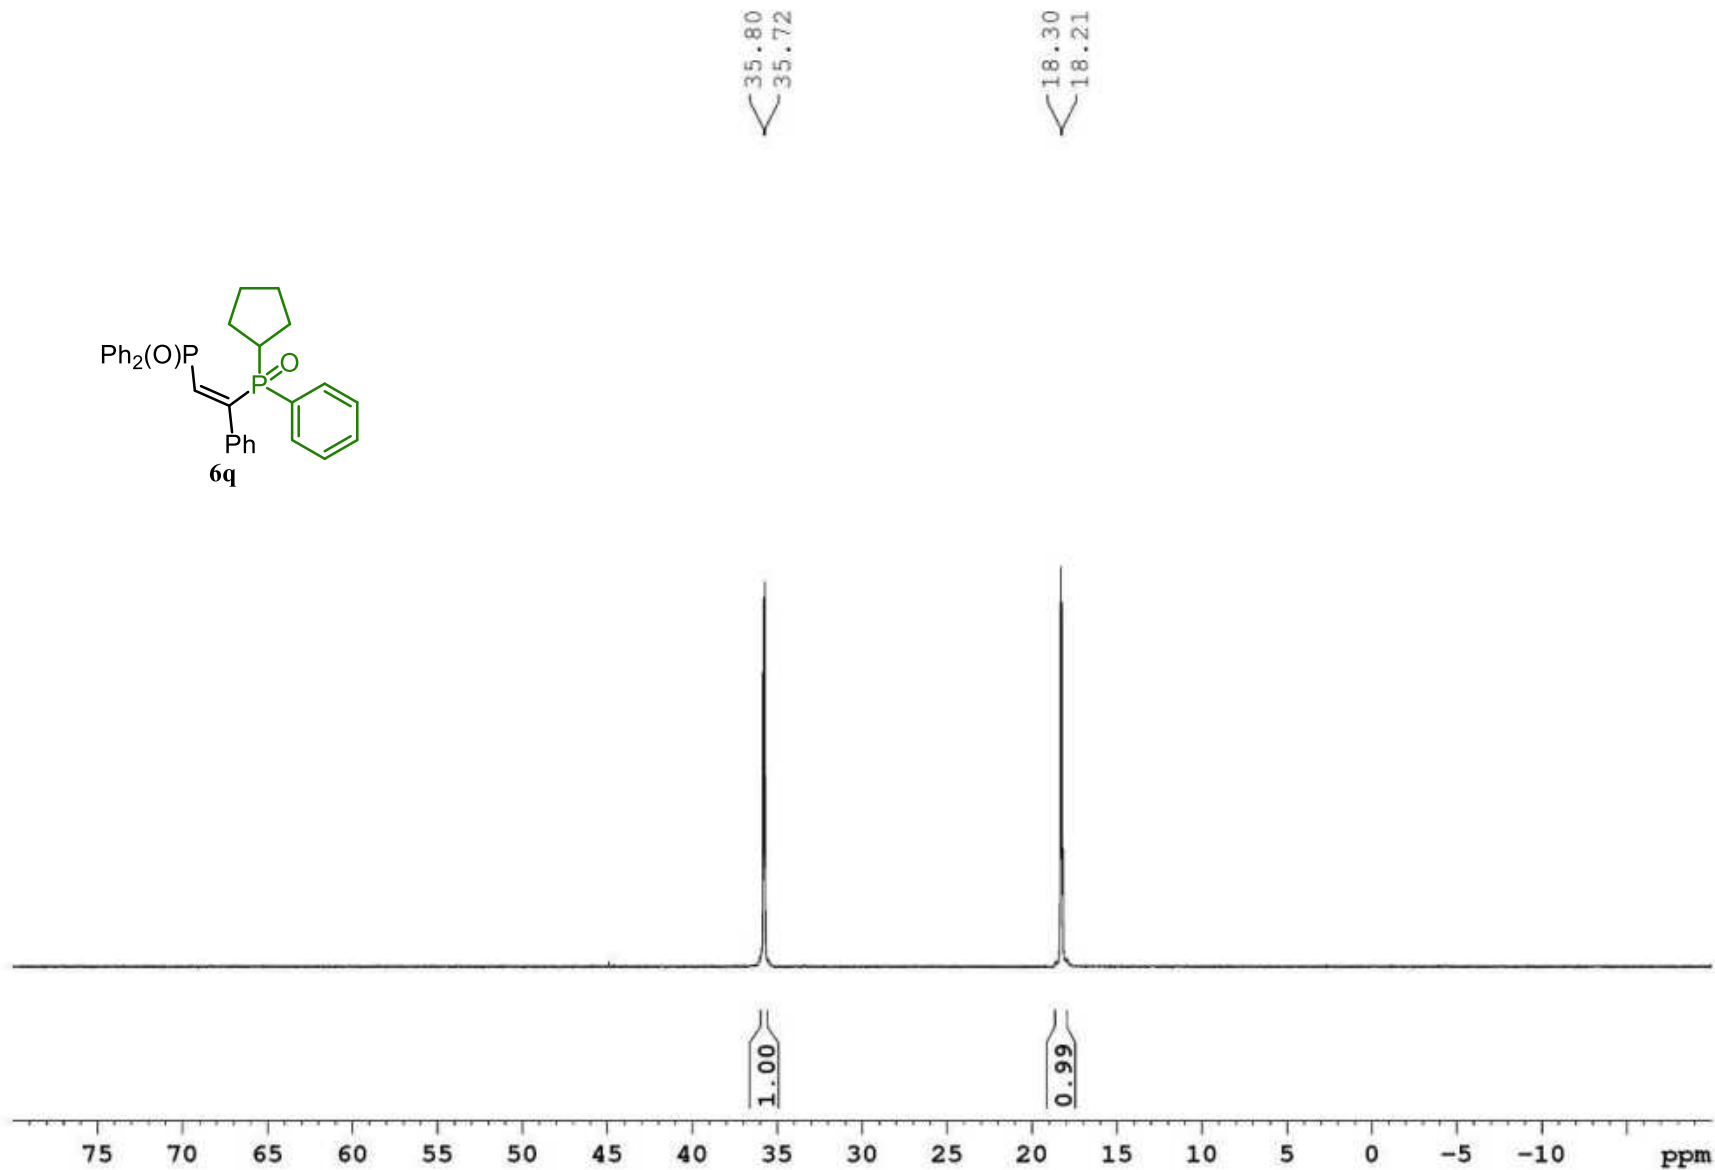

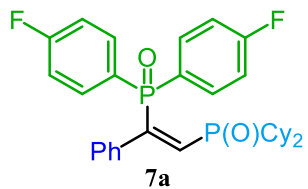

7.59  
7.57  
7.56  
7.55  
7.54  
7.53  
7.26  
7.18  
7.16  
7.15  
7.11  
7.01  
6.81  
6.79  
6.77  
6.66  
6.63  
6.56  
6.54

2.36  
2.34  
2.31  
2.29  
1.88  
1.86  
1.72  
1.59  
1.43  
1.21  
1.15  
1.13  
1.09

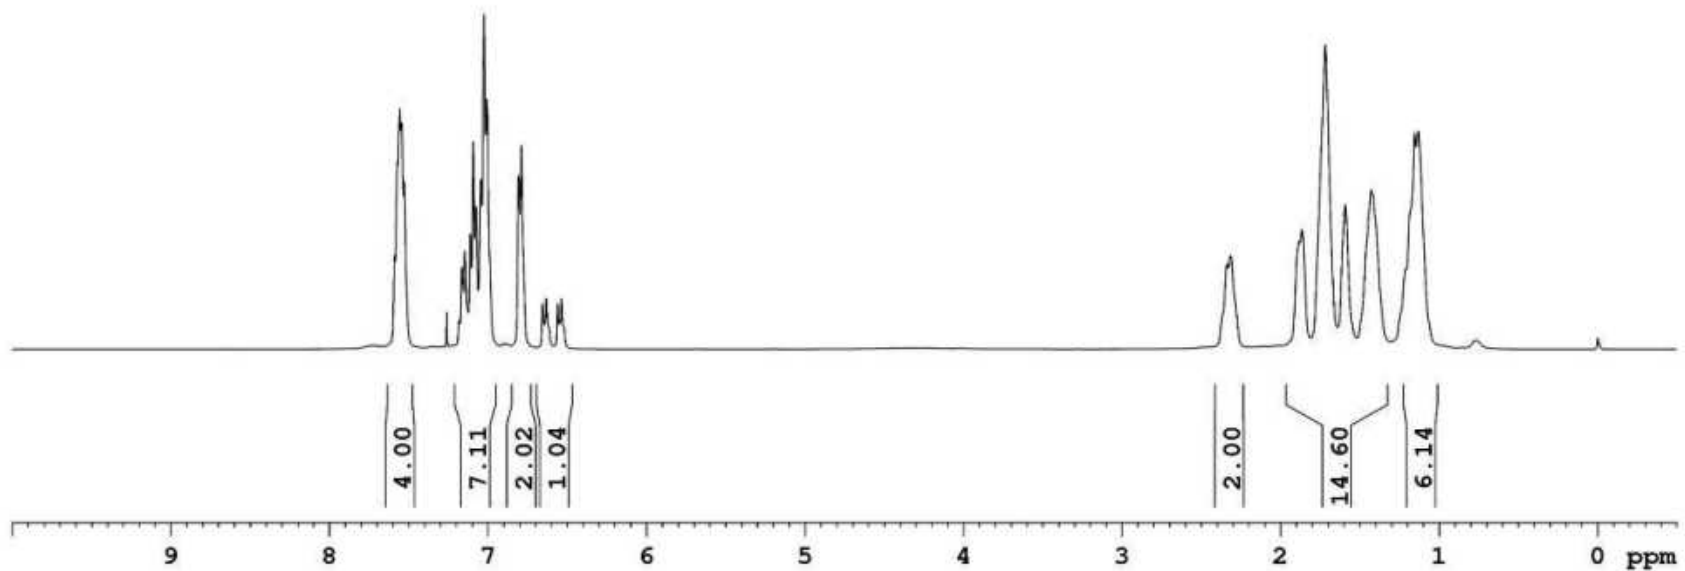

166.36  
166.33  
163.83  
163.80  
154.01  
153.13  
145.55  
144.86  
140.18  
140.05  
139.93  
134.73  
134.62  
134.53  
128.48  
128.23  
128.11  
128.08  
127.04  
127.01  
115.90  
115.77  
115.69  
115.55

38.68  
38.01  
26.63  
26.60  
26.54  
26.41  
26.36  
26.23  
26.03  
25.77

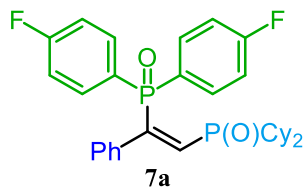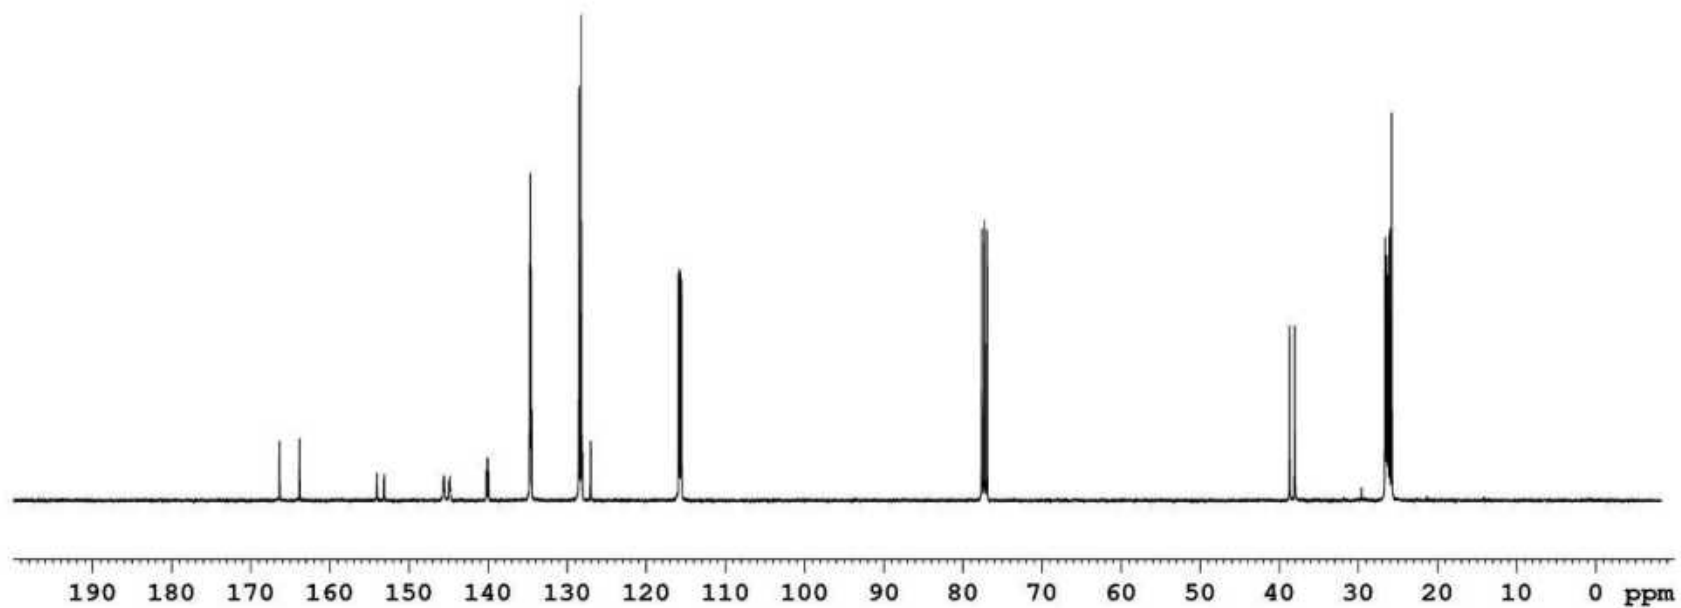

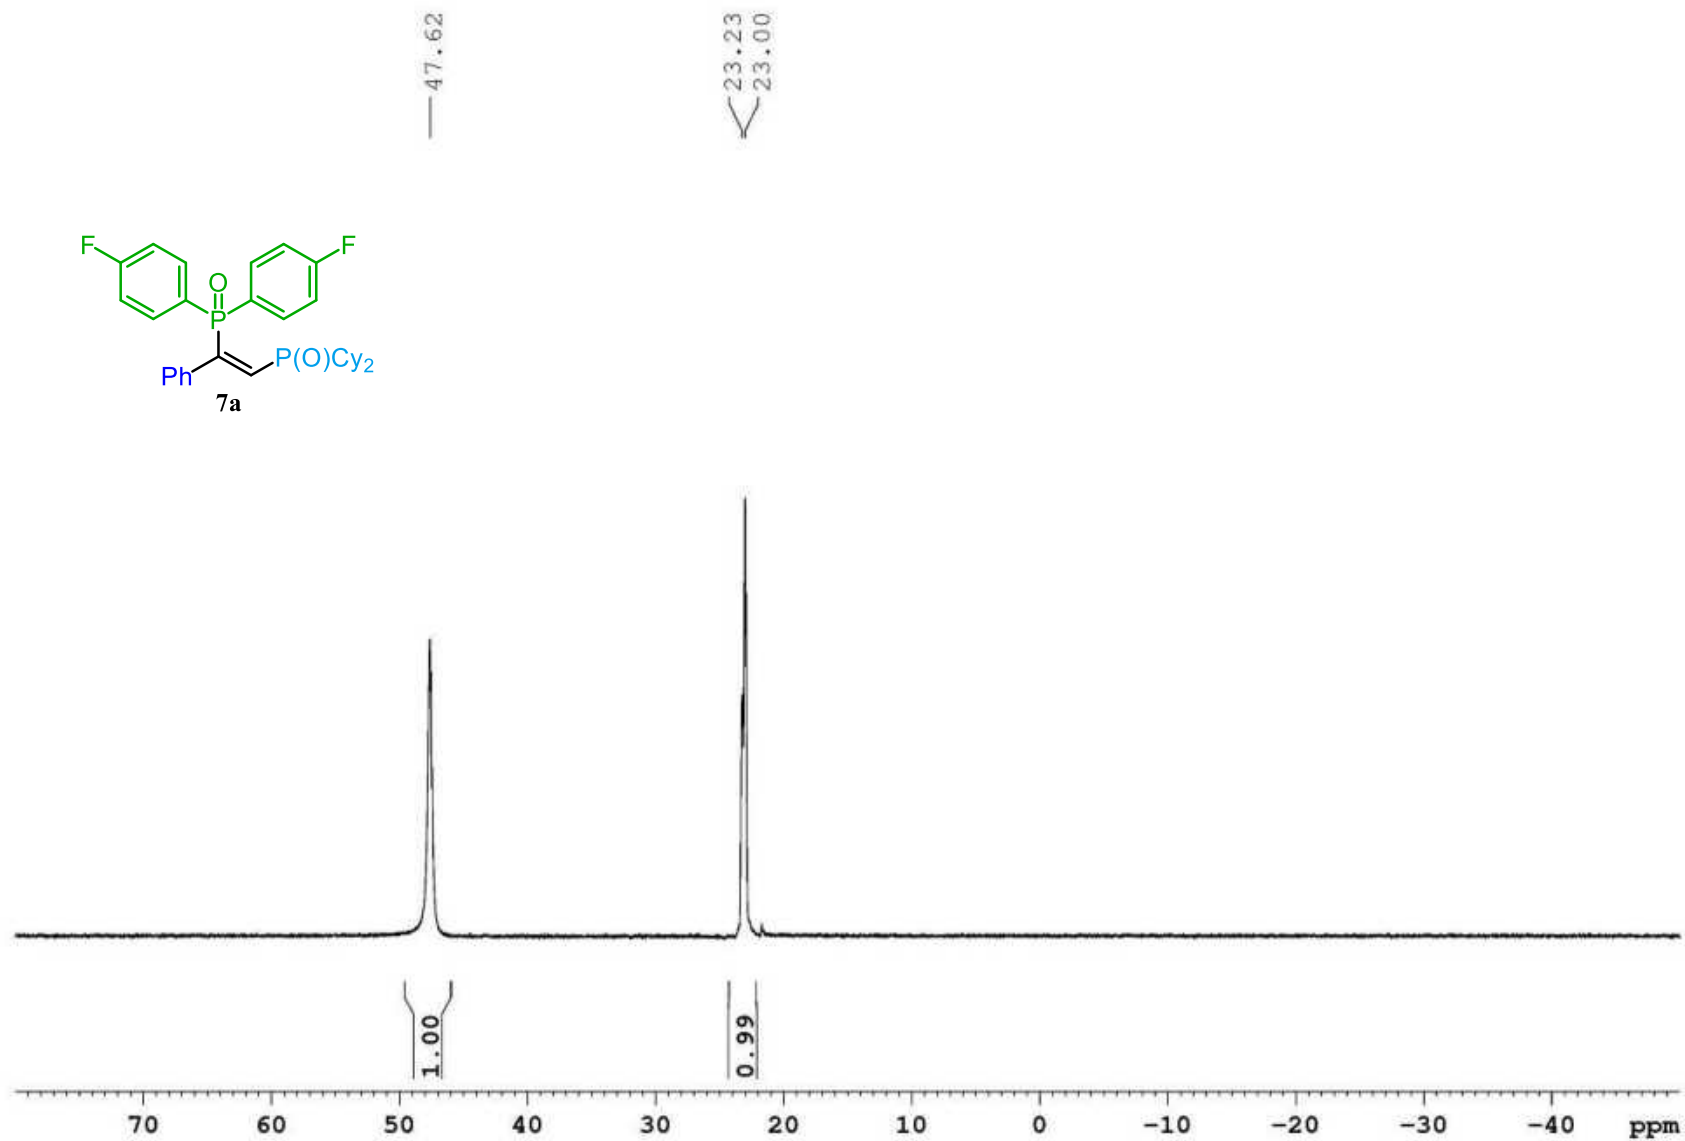

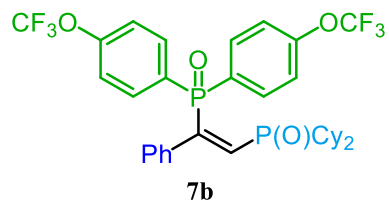

7.74  
7.72  
7.71  
7.69  
7.26  
7.25  
7.23  
7.21  
7.18  
7.17  
7.15  
6.91  
6.89  
6.69  
6.66  
6.59  
6.56

2.21  
2.18  
2.15  
2.12  
1.88  
1.85  
1.80  
1.76  
1.74  
1.66  
1.64  
1.42  
1.41  
1.41  
1.39  
1.38  
1.22  
1.19  
1.17  
1.14  
1.12

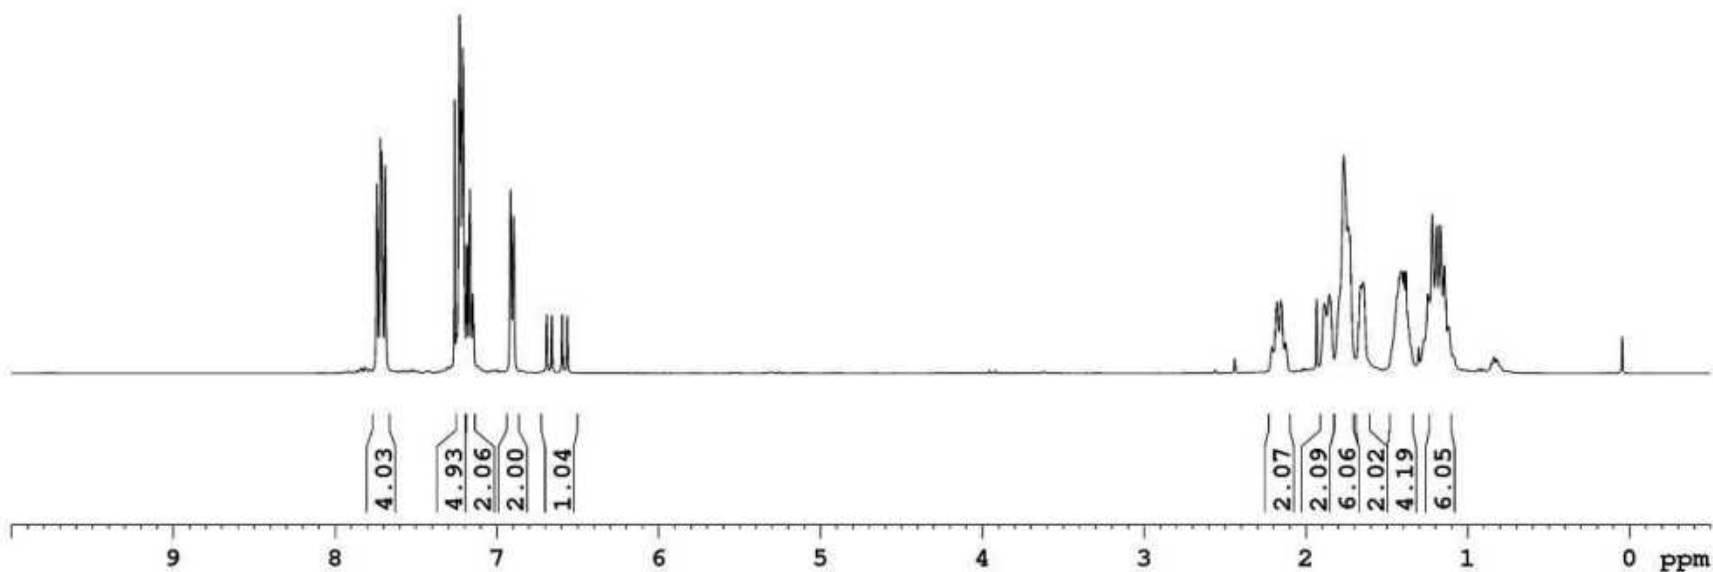



153.60  
 152.73  
 151.00  
 150.99  
 150.97  
 150.95  
 143.64  
 143.55  
 142.92  
 142.83  
 139.40  
 139.29  
 139.27  
 139.15  
 133.23  
 133.12  
 130.12  
 129.05  
 127.53  
 127.42  
 127.39  
 127.29  
 123.11  
 120.54  
 119.23  
 119.10  
 117.97  
 115.39

37.37  
 36.70  
 25.54  
 25.51  
 25.42  
 25.38  
 25.25  
 24.87  
 24.84  
 24.76

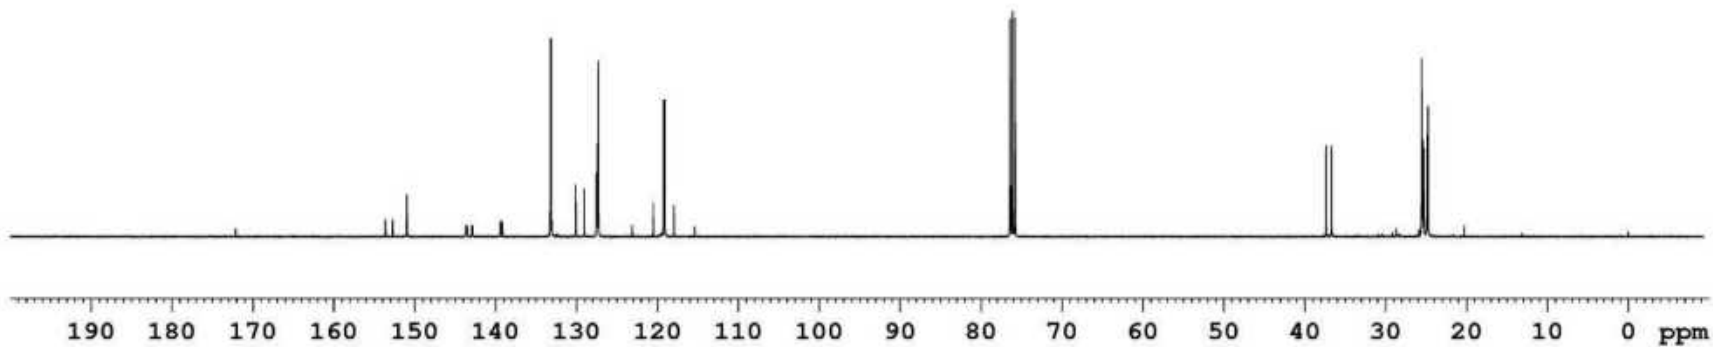



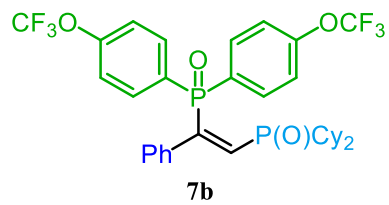

45.61  
45.56

22.72  
22.64

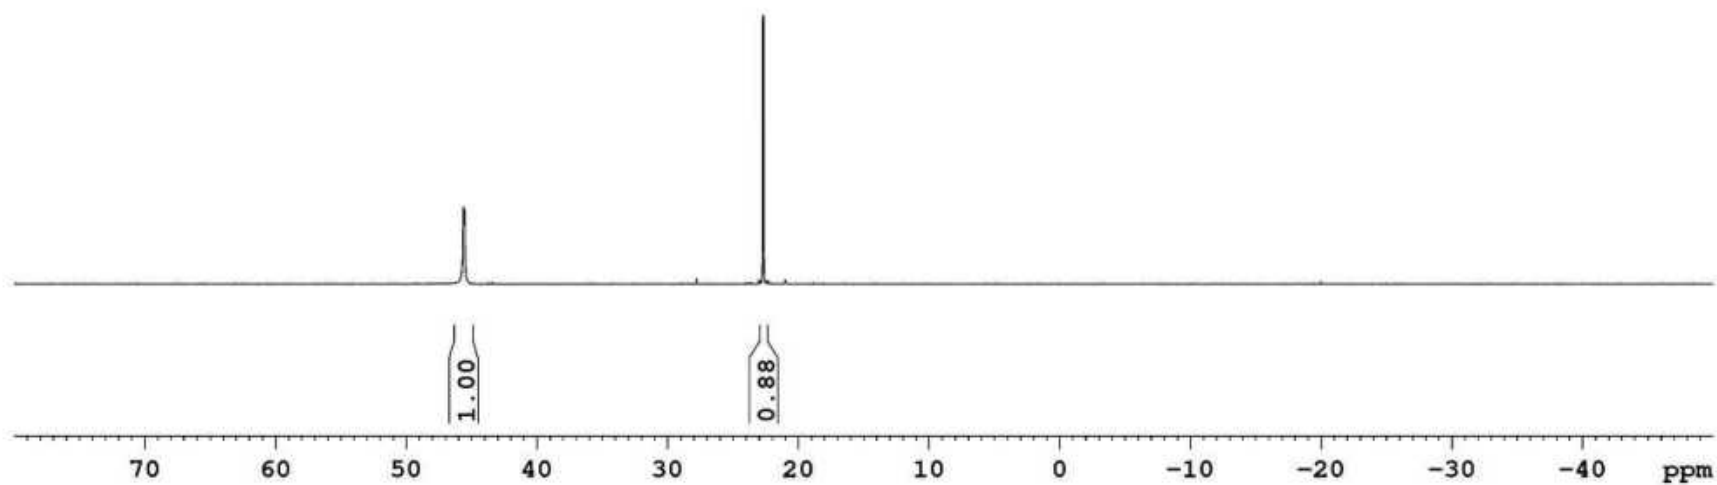

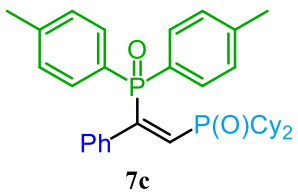

7.37  
7.35  
7.34  
7.32  
7.26  
7.14  
7.13  
7.12  
7.11  
7.04  
7.02  
7.00  
6.72  
6.70  
6.65  
6.64  
6.56  
6.55

2.78  
2.75  
2.73  
2.69  
2.29  
1.98  
1.95  
1.85  
1.82  
1.81  
1.75  
1.70  
1.68  
1.59  
1.50  
1.49  
1.48  
1.29  
1.26  
1.26  
1.17  
1.15

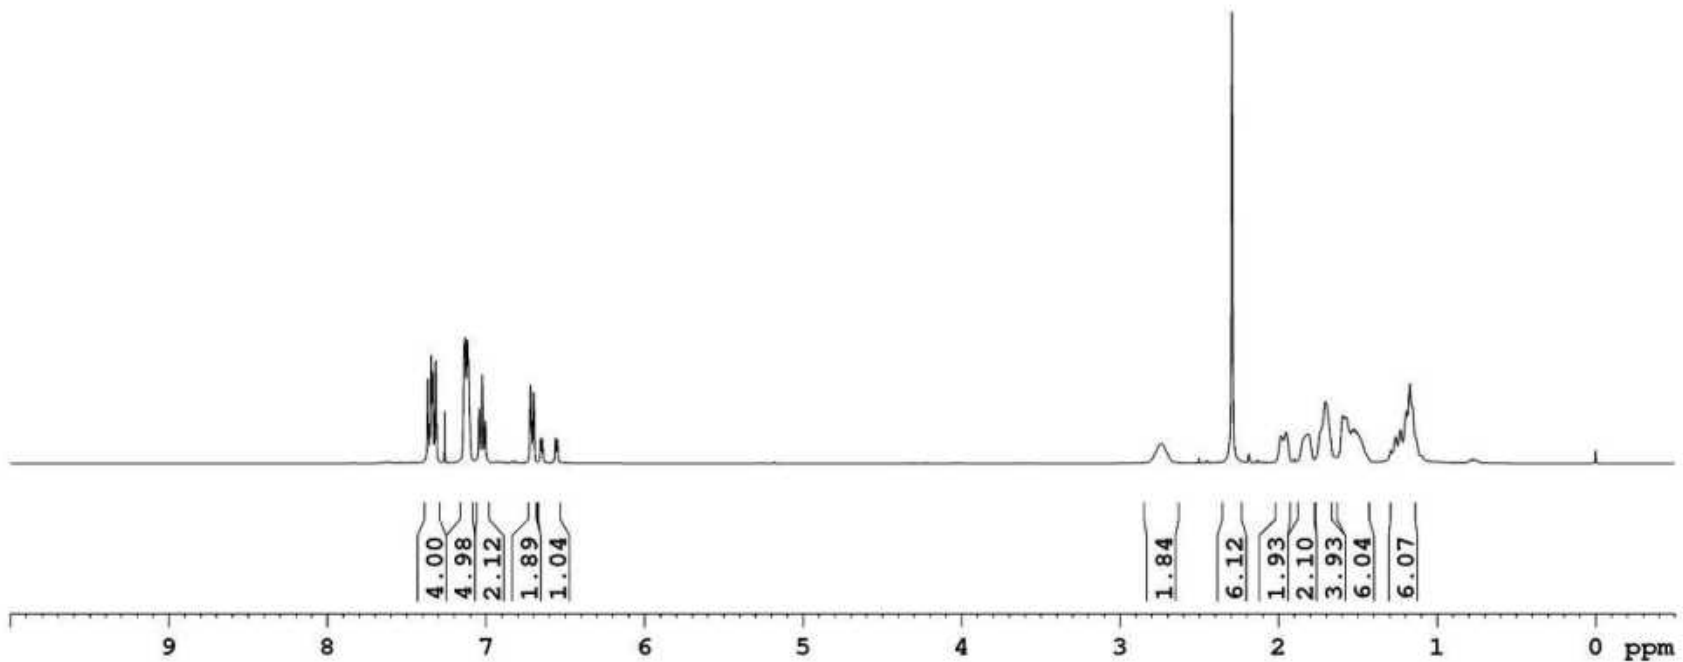



152.96  
152.09  
147.64  
146.90  
142.83  
142.80  
140.03  
139.90  
139.77  
132.14  
132.05  
129.19  
129.07  
128.83  
128.80  
128.27  
127.99  
127.21

39.12  
38.46  
26.88  
26.84  
26.53  
26.39  
26.25  
25.87  
21.59

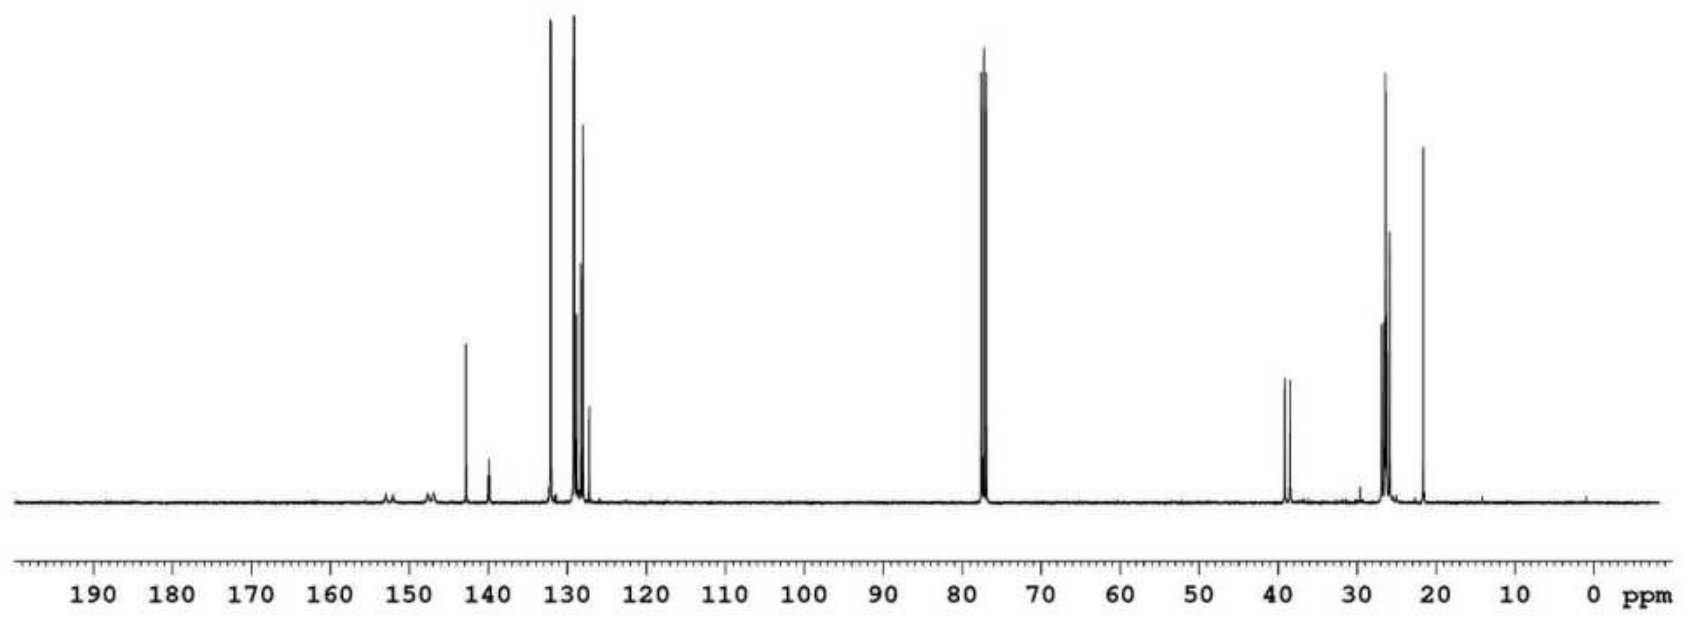

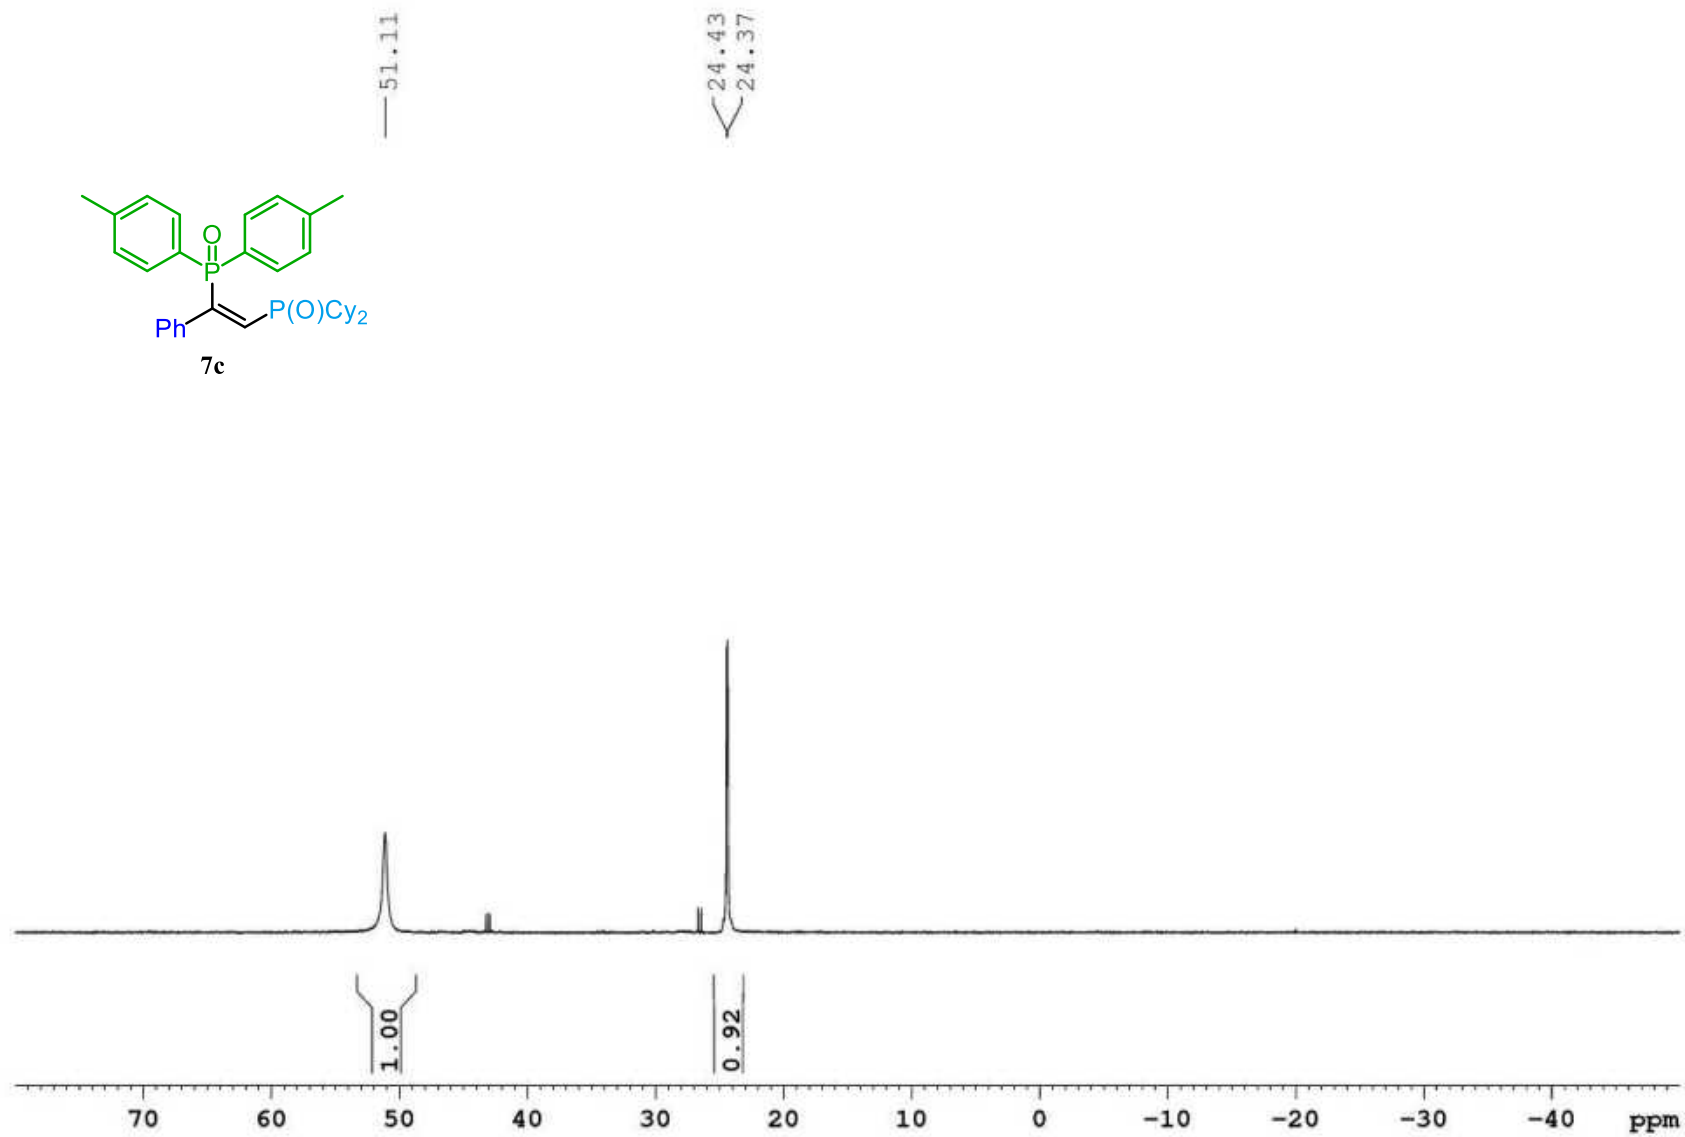

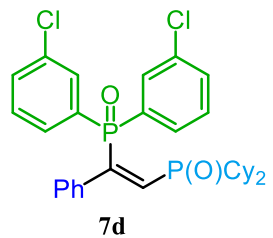

7.65  
7.62  
7.46  
7.44  
7.41  
7.33  
7.32  
7.31  
7.30  
7.29  
7.28  
7.26  
7.24  
7.22  
7.20  
7.18  
7.16  
6.91  
6.90  
6.72  
6.68  
6.62  
6.59

2.22  
2.19  
2.17  
2.14  
1.92  
1.89  
1.82  
1.79  
1.76  
1.69  
1.68  
1.66  
1.48  
1.45  
1.44  
1.43  
1.42  
1.39  
1.27  
1.25  
1.22  
1.20  
1.17

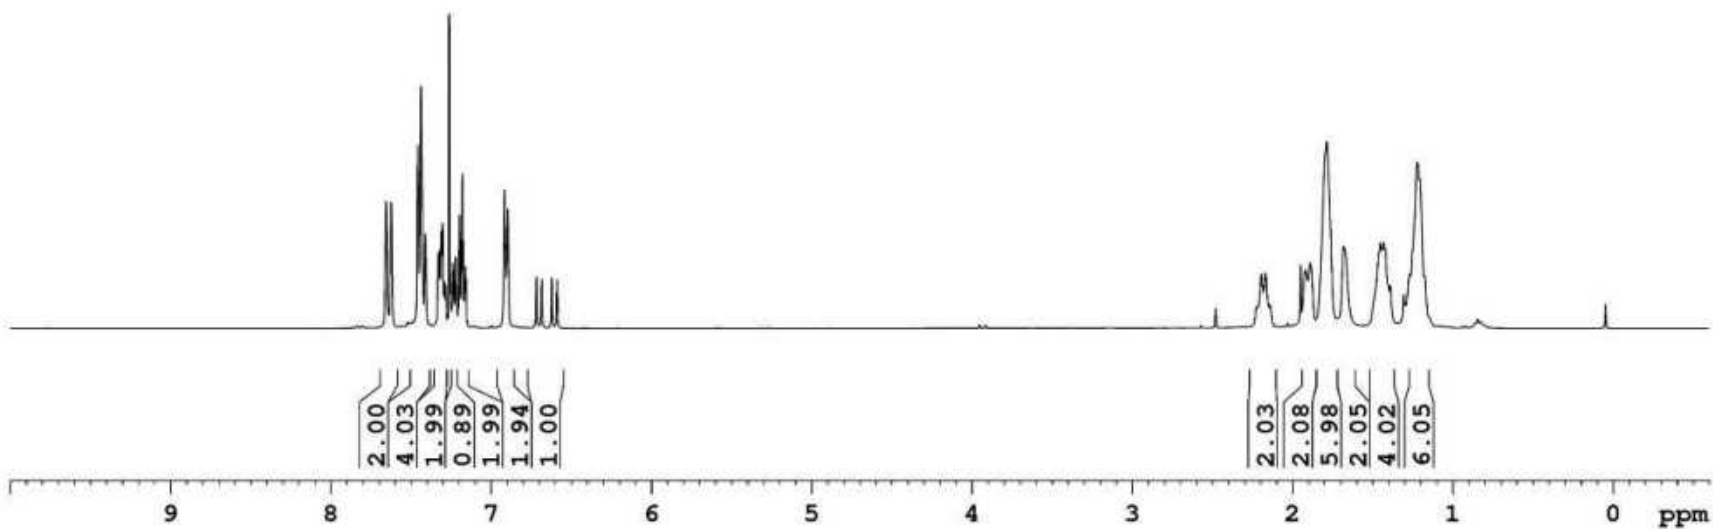

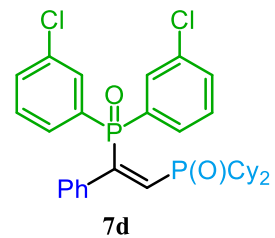

154.34  
153.47  
144.93  
144.84  
144.22  
144.13  
140.12  
140.01  
139.99  
139.87  
134.85  
134.68  
134.64  
133.61  
132.28  
132.26  
131.83  
131.72  
130.09  
130.00  
129.85  
129.72  
128.63  
128.39  
128.35

38.23  
37.56  
26.62  
26.59  
26.46  
26.44  
26.31  
25.90  
25.87  
25.81

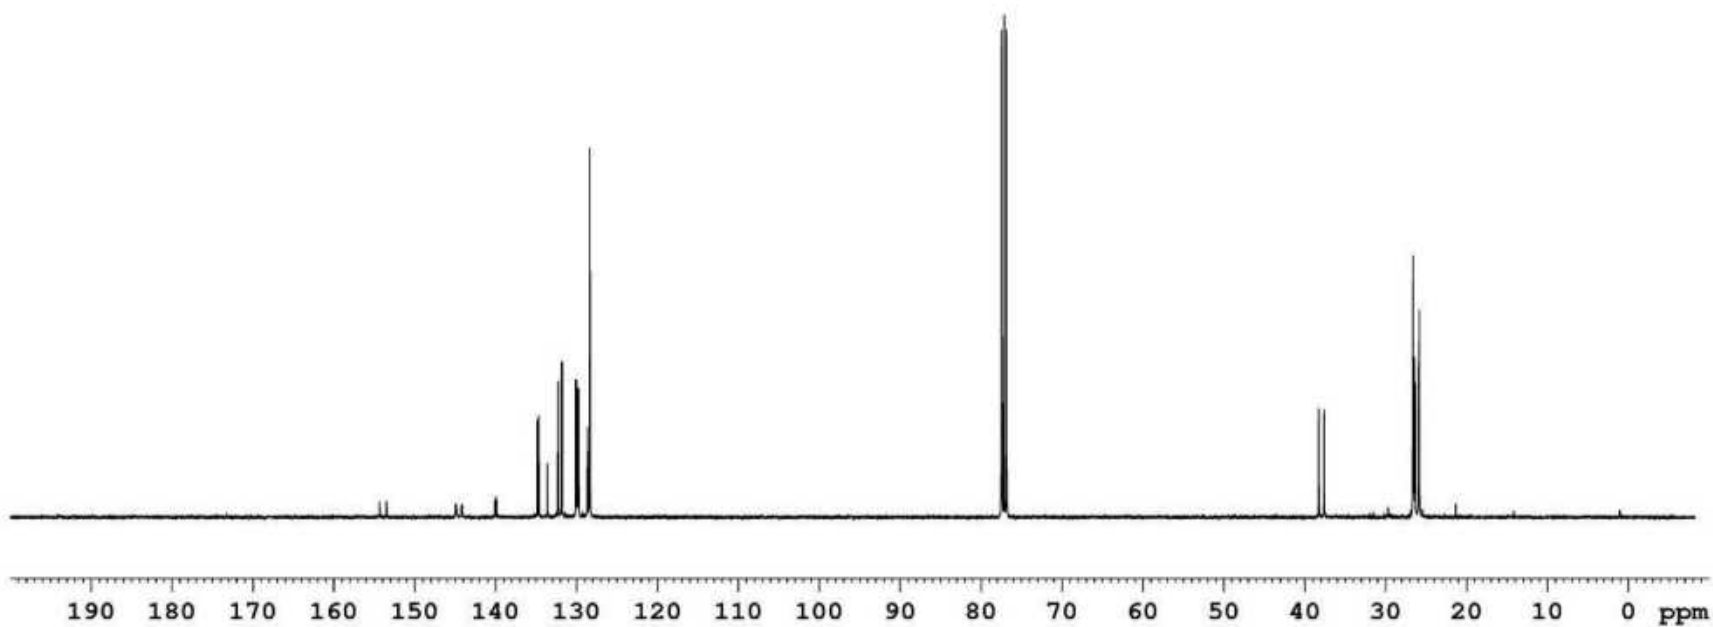

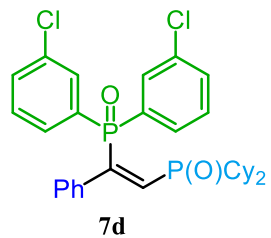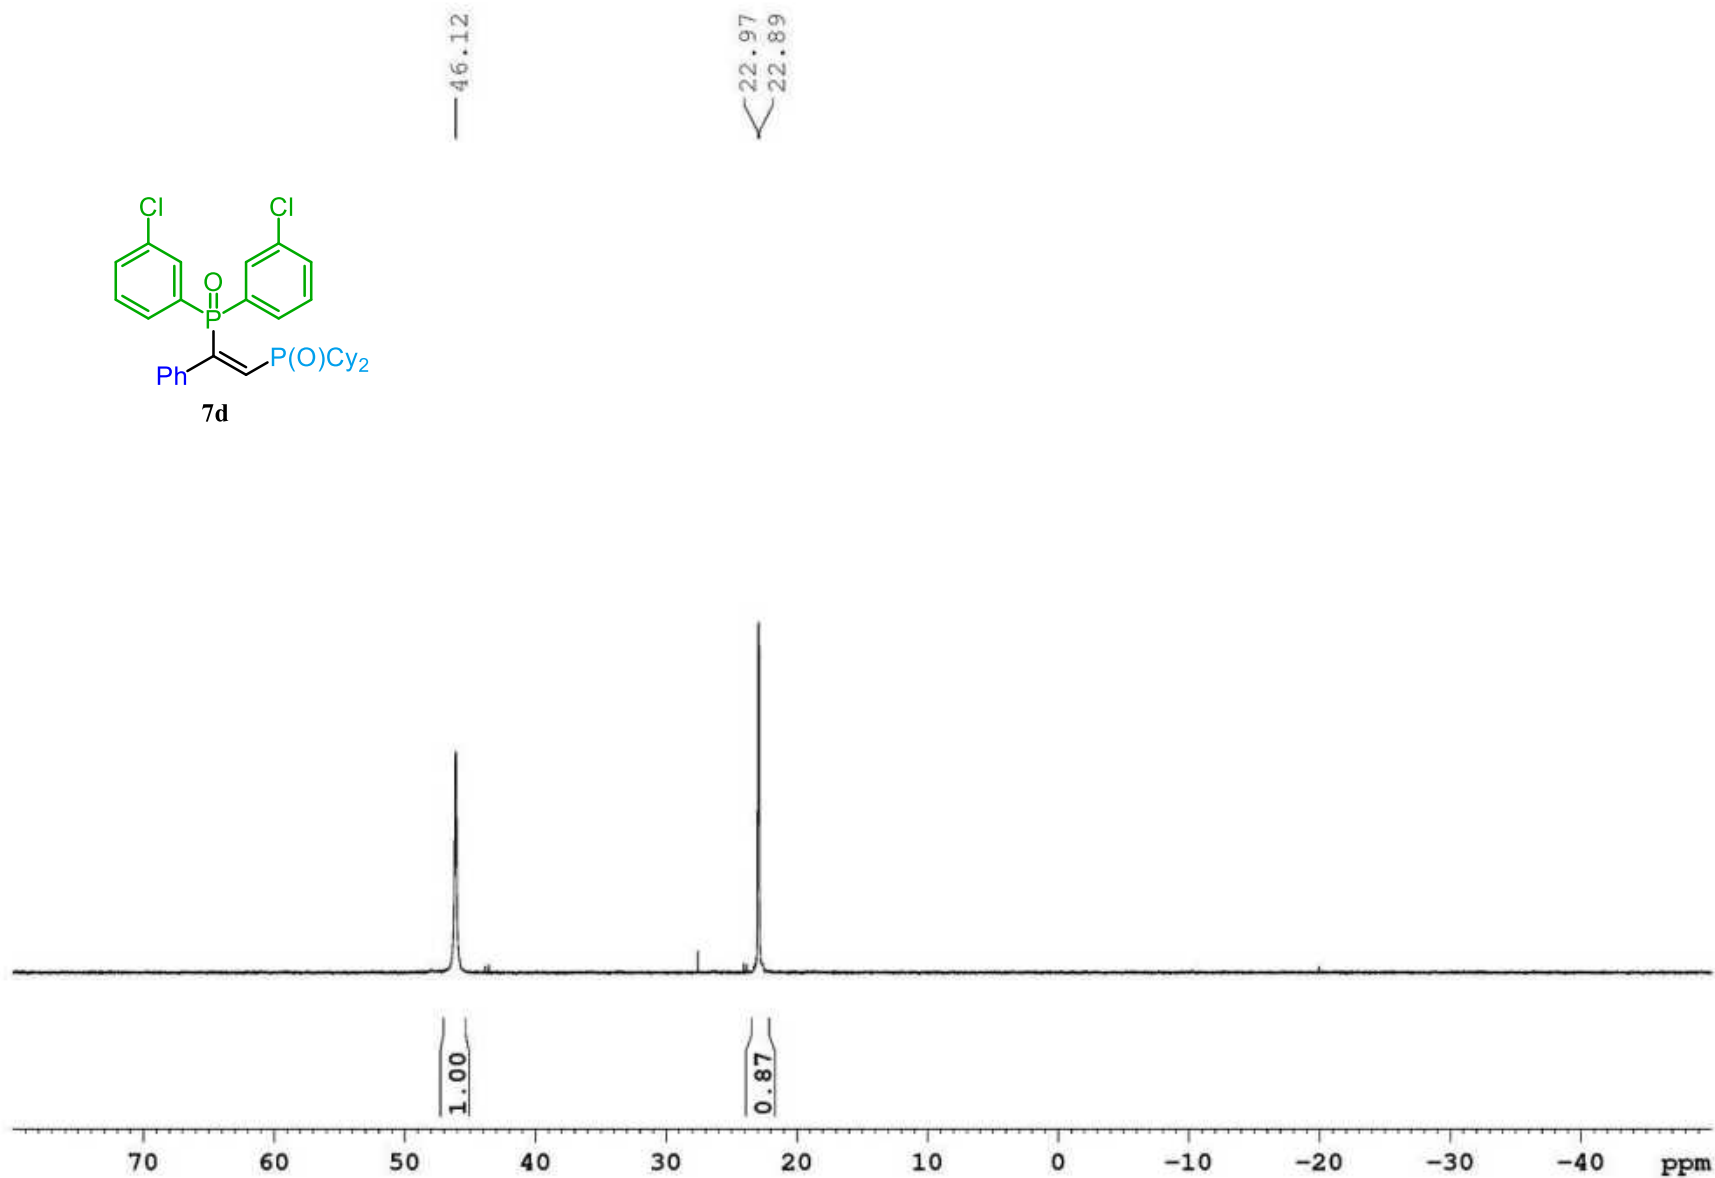

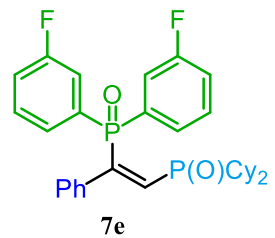

7.41  
7.40  
7.39  
7.38  
7.34  
7.34  
7.27  
7.26  
7.24  
7.22  
7.21  
7.19  
7.17  
6.93  
6.91  
6.77  
6.74  
6.67  
6.64

2.35  
2.32  
2.30  
2.27  
1.98  
1.95  
1.82  
1.70  
1.56  
1.51  
1.50  
1.45  
1.31  
1.26  
1.25  
1.23  
1.20

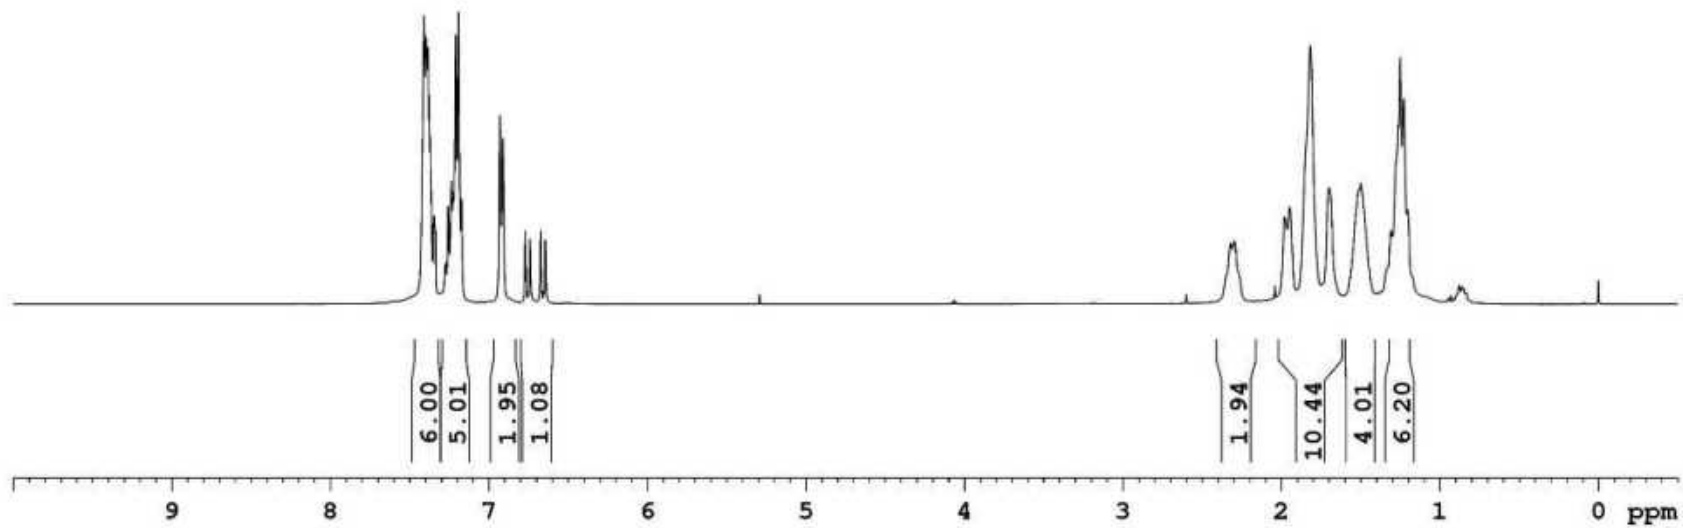



163.55  
163.38  
161.06  
160.89  
153.83  
152.97  
145.72  
145.05  
140.11  
139.98  
139.86  
134.95  
134.89  
133.91  
133.85  
130.43  
130.35  
130.28  
130.21  
128.55  
128.36  
128.29  
127.73  
127.70  
127.64  
127.61  
119.41  
119.20  
118.95  
118.85  
118.73  
118.62

38.38  
37.71  
26.61  
26.58  
26.52  
26.39  
26.25  
25.92  
25.90  
25.78

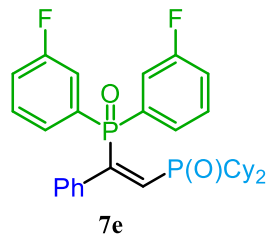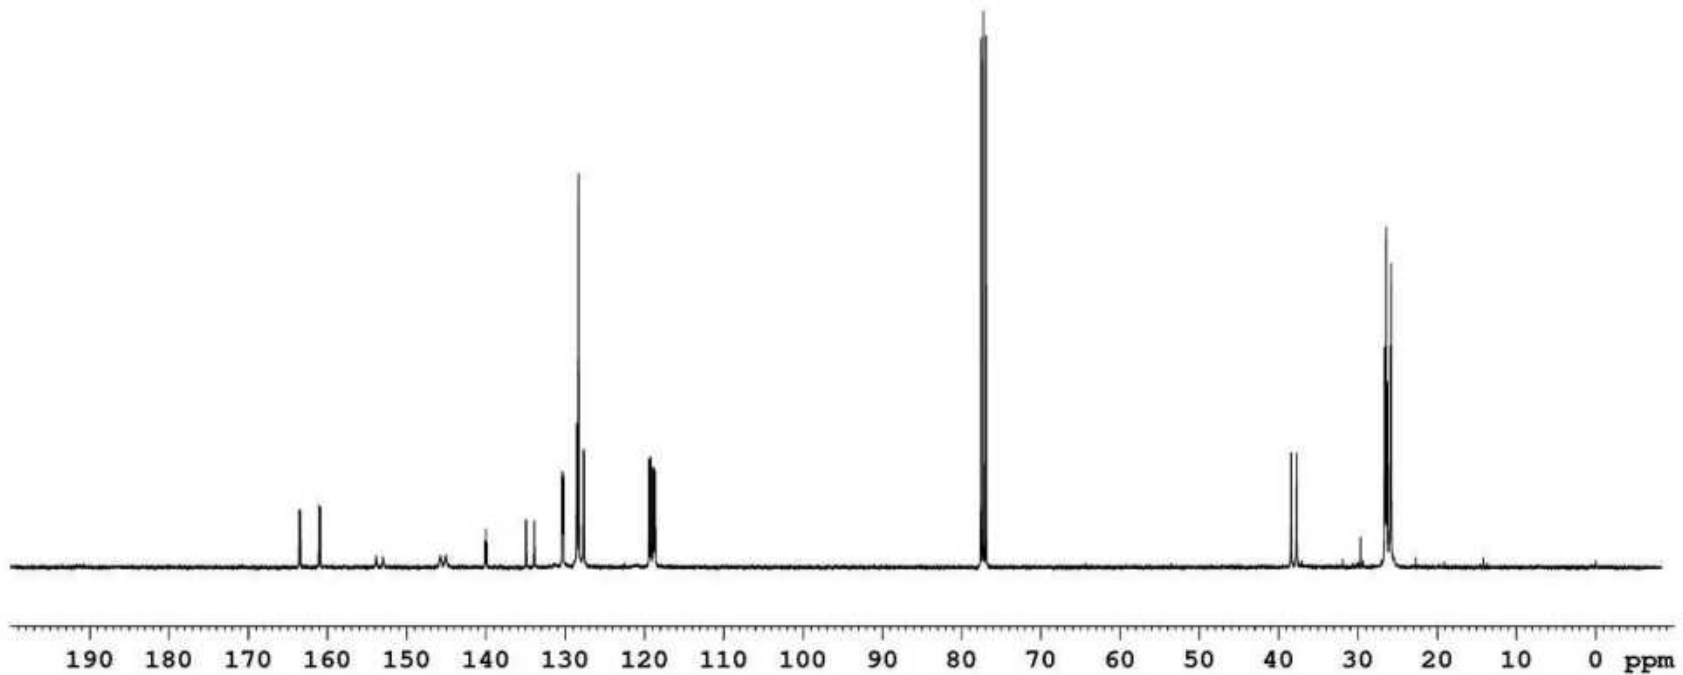

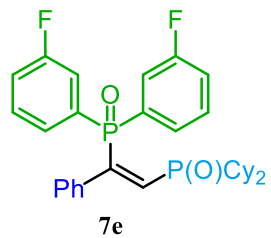

—46.19

—22.41

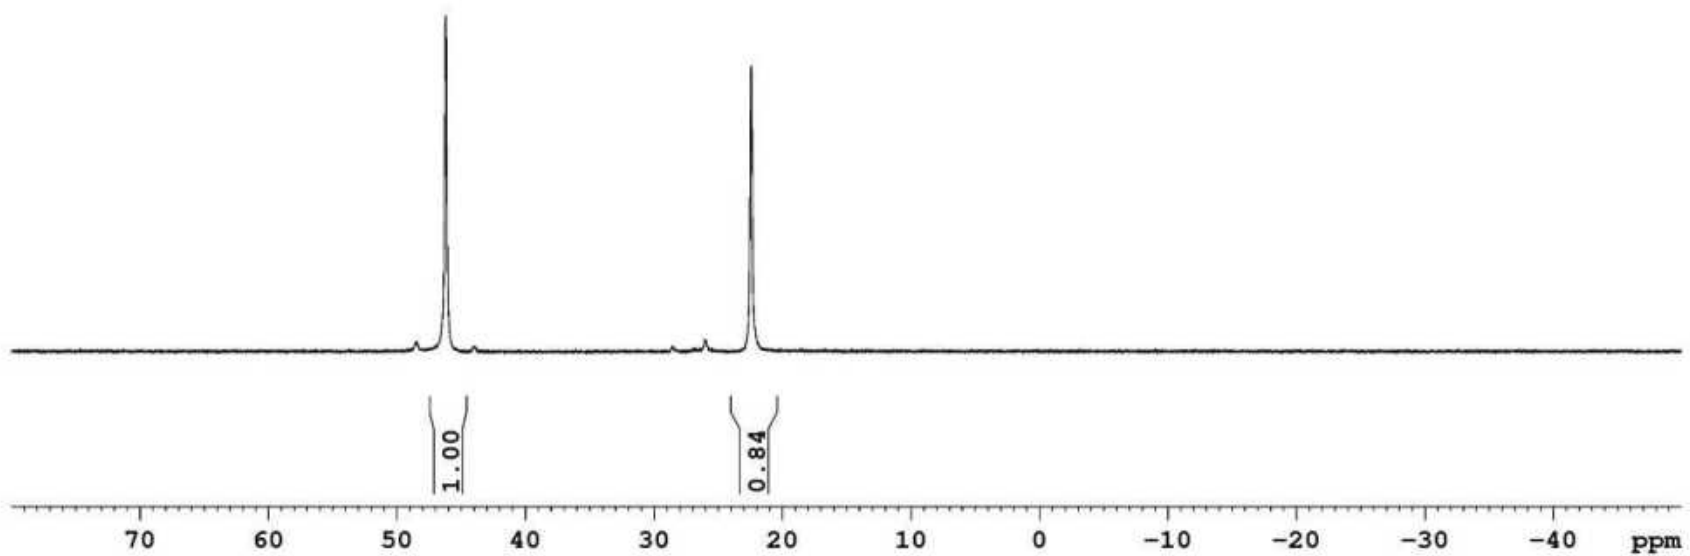

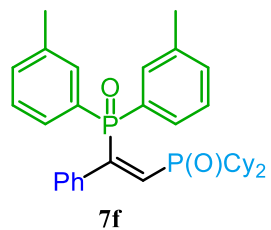

7.40  
7.37  
7.28  
7.26  
7.24  
7.22  
7.21  
7.19  
7.17  
7.15  
7.08  
7.07  
7.05  
6.75  
6.73  
6.73  
6.70  
6.69  
6.60  
6.60

2.75  
2.72  
2.70  
2.27  
2.01  
1.98  
1.84  
1.74  
1.62  
1.55  
1.53  
1.32  
1.30  
1.26  
1.22  
1.20  
1.17  
1.14

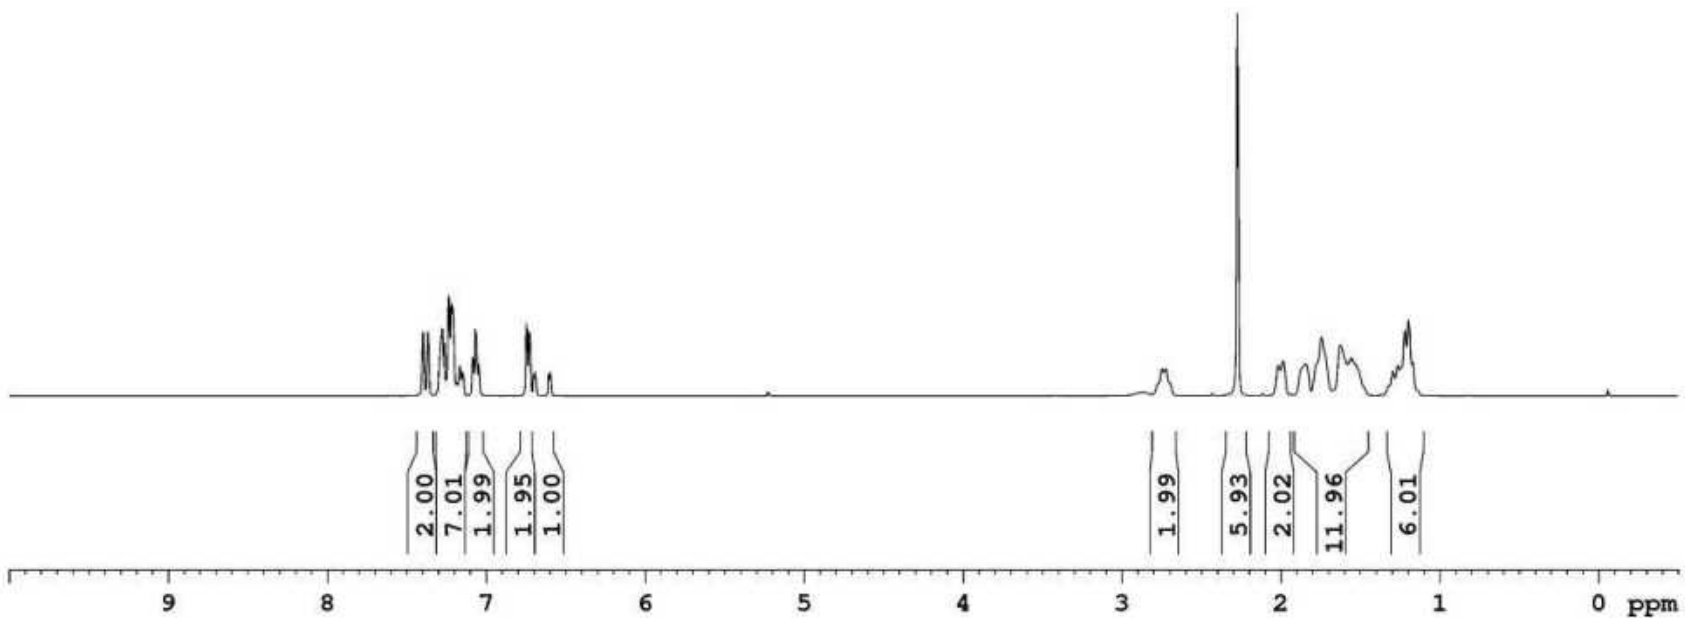

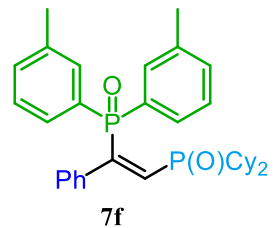

152.83  
151.96  
147.85  
147.12  
140.08  
139.95  
139.83  
138.32  
138.20  
133.04  
133.01  
132.64  
132.54  
131.42  
130.40  
129.27  
129.17  
128.92  
128.89  
128.27  
128.14  
127.96

39.13  
38.47  
26.94  
26.91  
26.59  
26.46  
26.42  
26.38  
26.29  
25.89  
21.39

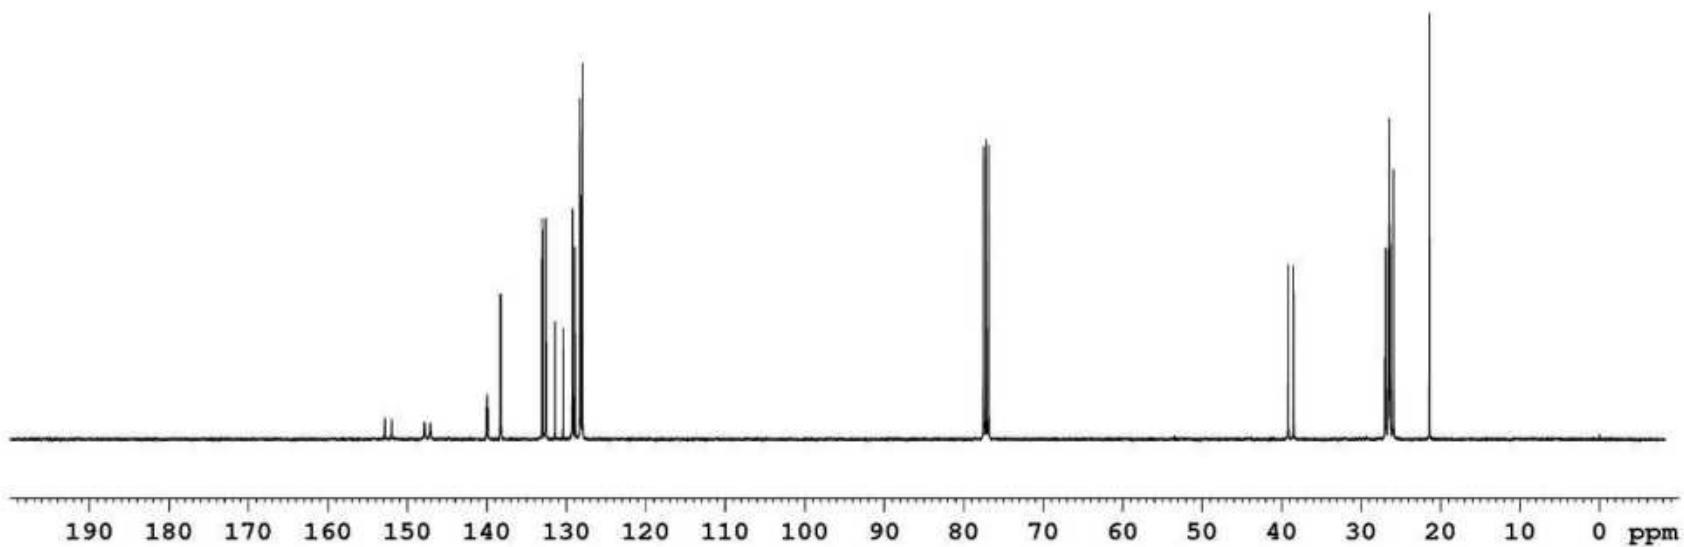

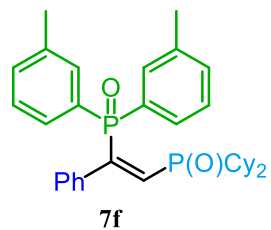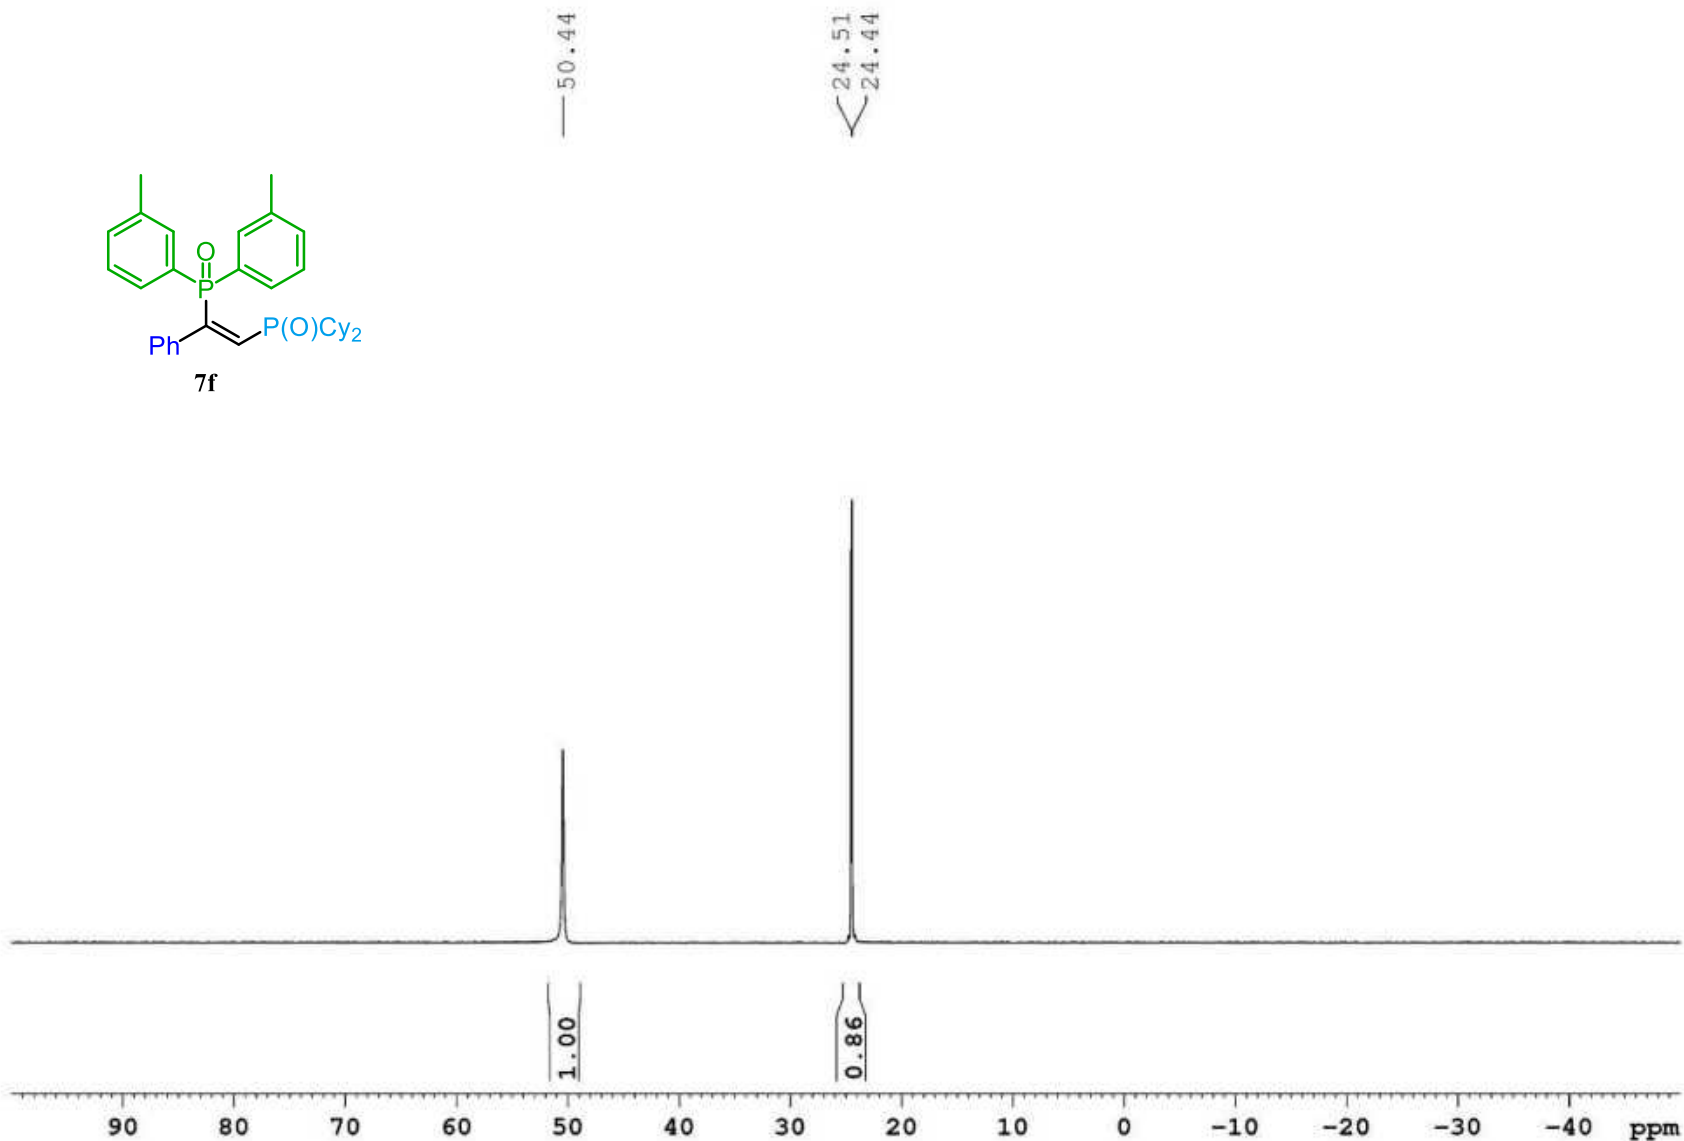

7.46  
7.44  
7.44  
7.31  
7.26  
7.05  
7.05  
6.96  
6.96  
6.93  
6.92  
6.89

3.67  
3.64  
3.63  
3.61  
3.59  
2.59  
2.53  
2.47  
1.94  
1.91  
1.85  
1.84  
1.81  
1.80  
1.78  
1.78  
1.77  
1.76  
1.75  
1.62  
1.52  
1.34  
1.17  
1.12  
1.10  
1.08  
0.86  
0.80  
0.78  
0.76

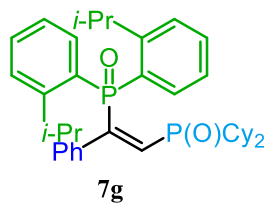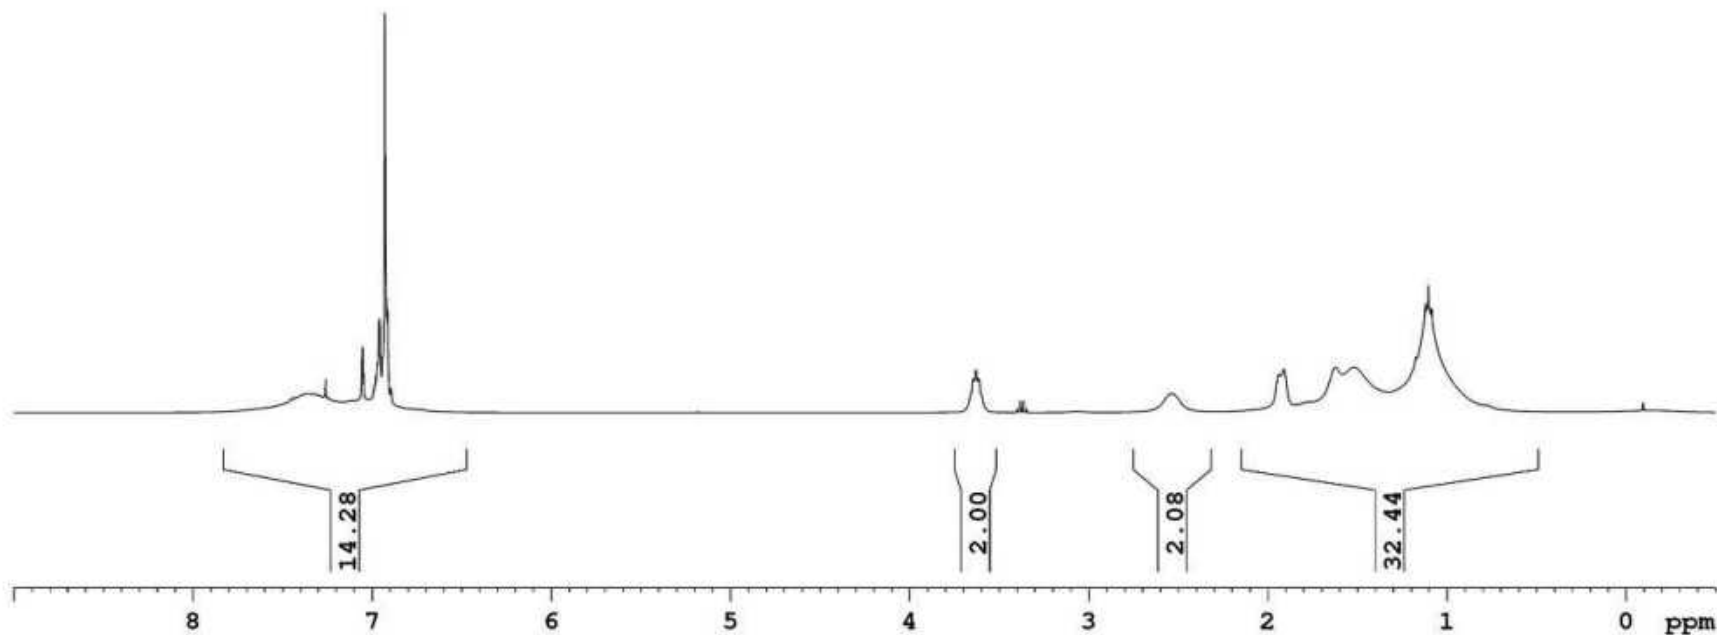

154.45  
152.94  
152.10  
149.29  
149.22  
148.56  
148.49  
140.03  
139.91  
139.78  
133.46  
133.32  
132.55  
130.71  
129.69  
128.62  
128.59  
128.22  
127.64  
127.15  
125.18

38.48  
37.82  
31.85  
31.80  
26.60  
26.36  
26.18  
26.06  
25.71  
24.68  
23.70  
22.90

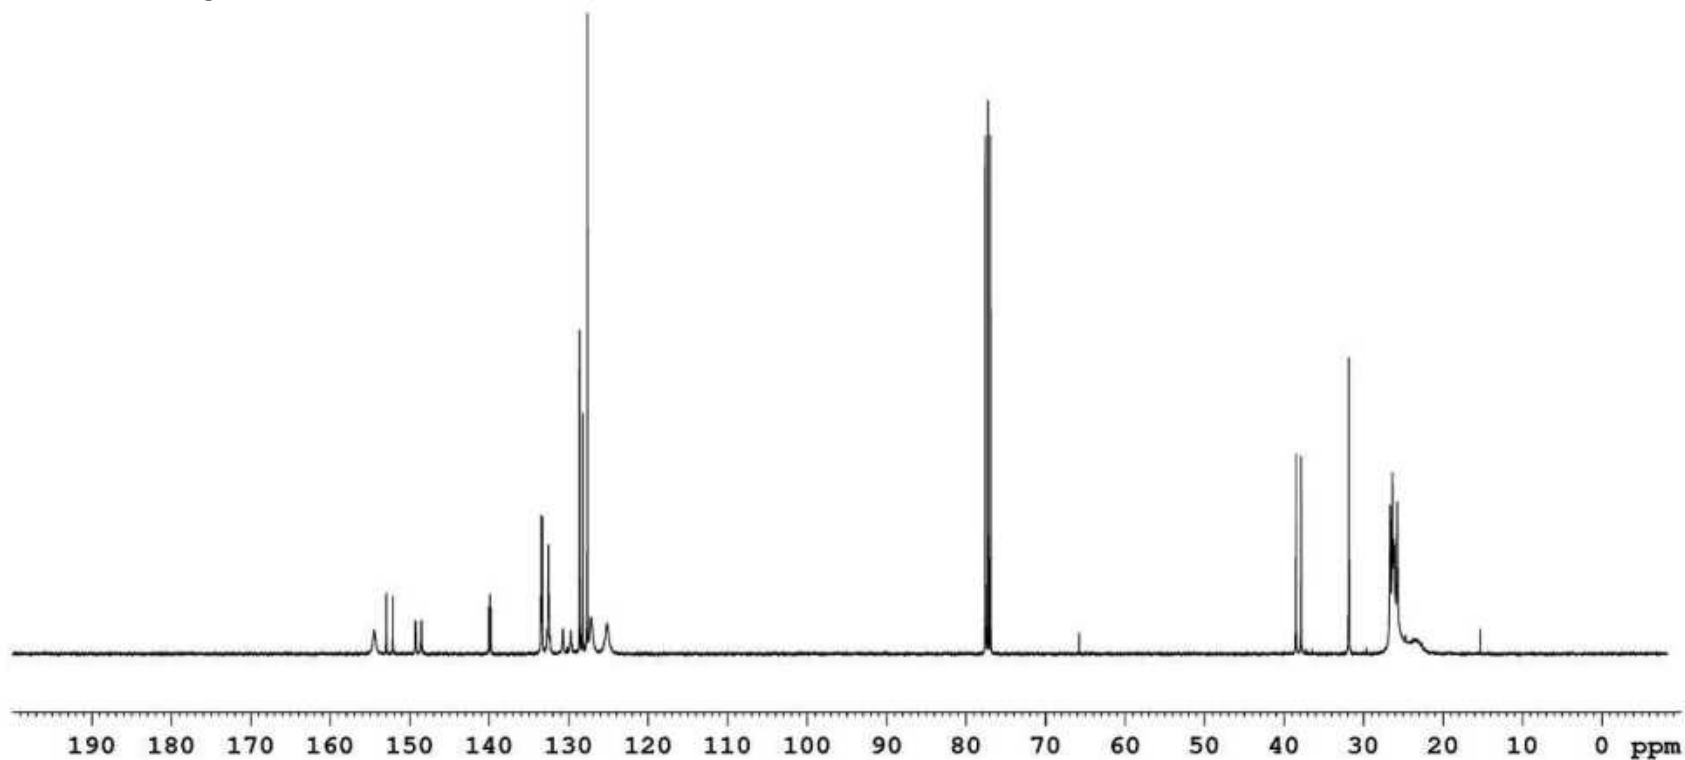

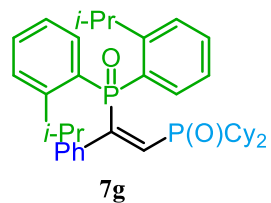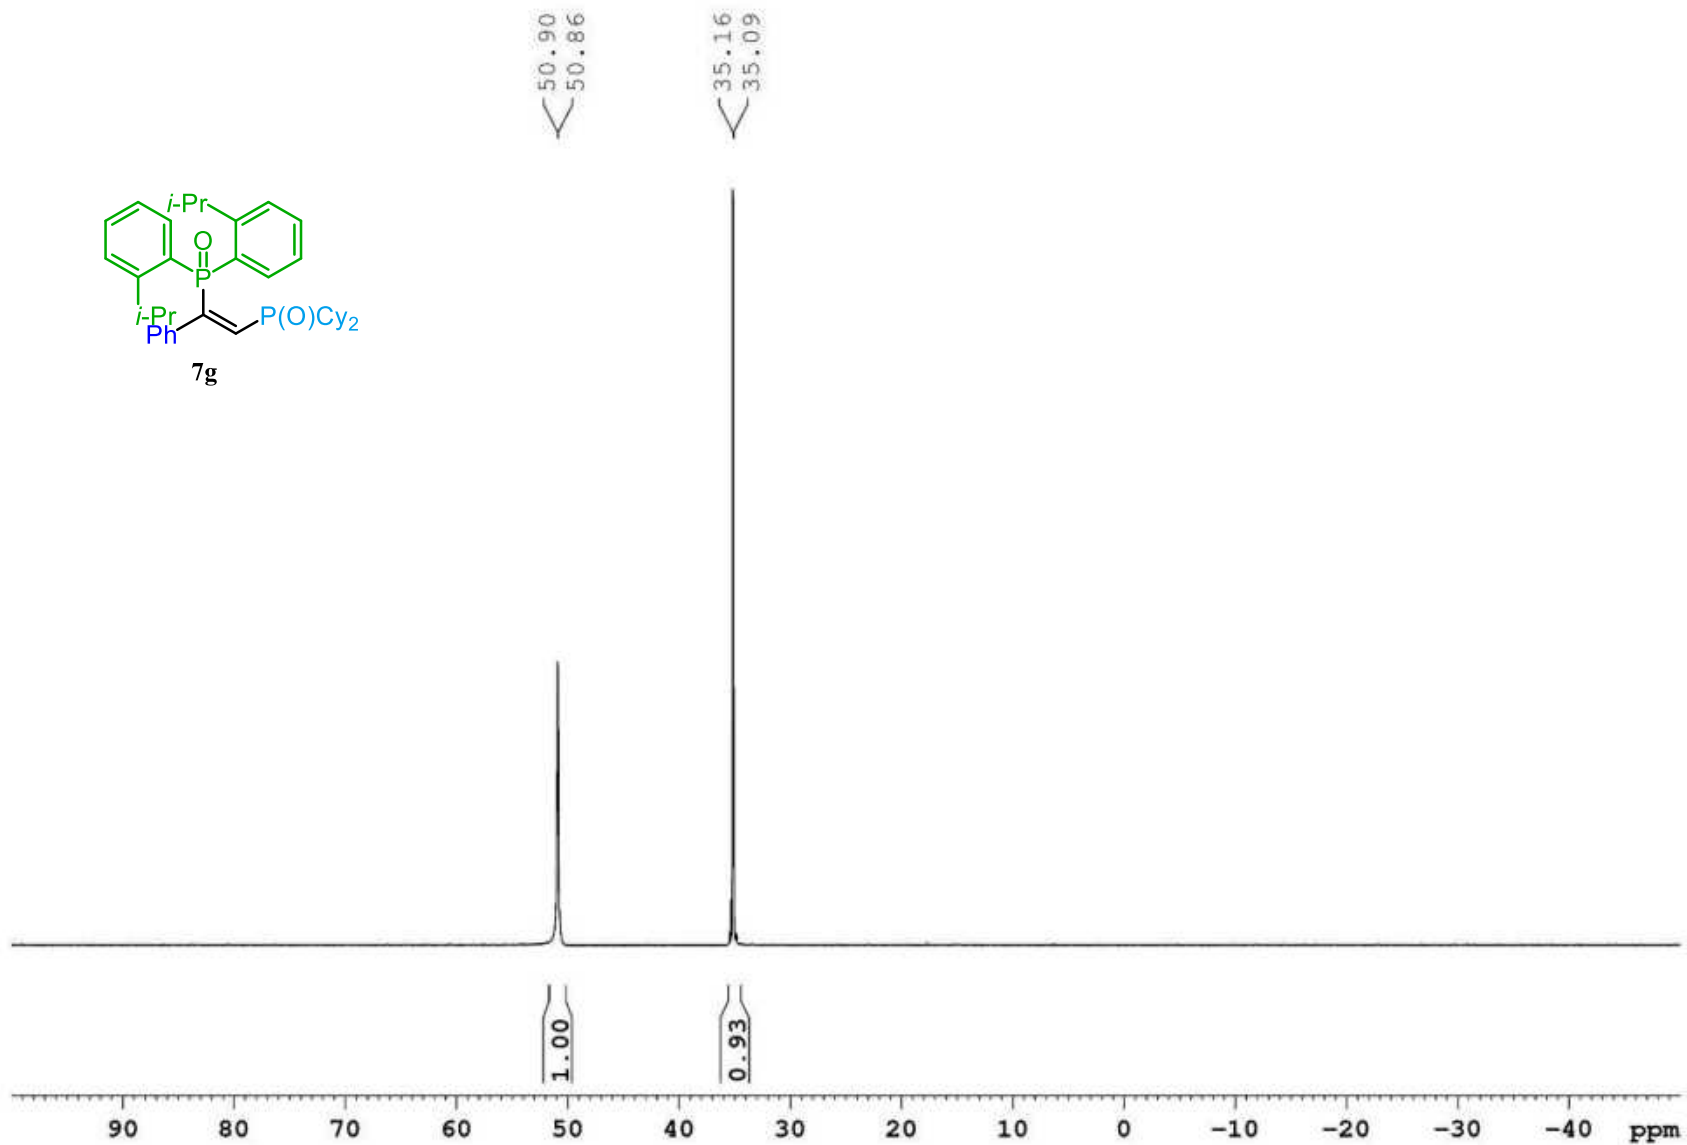



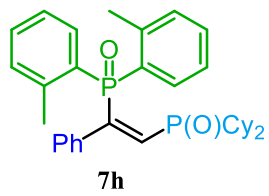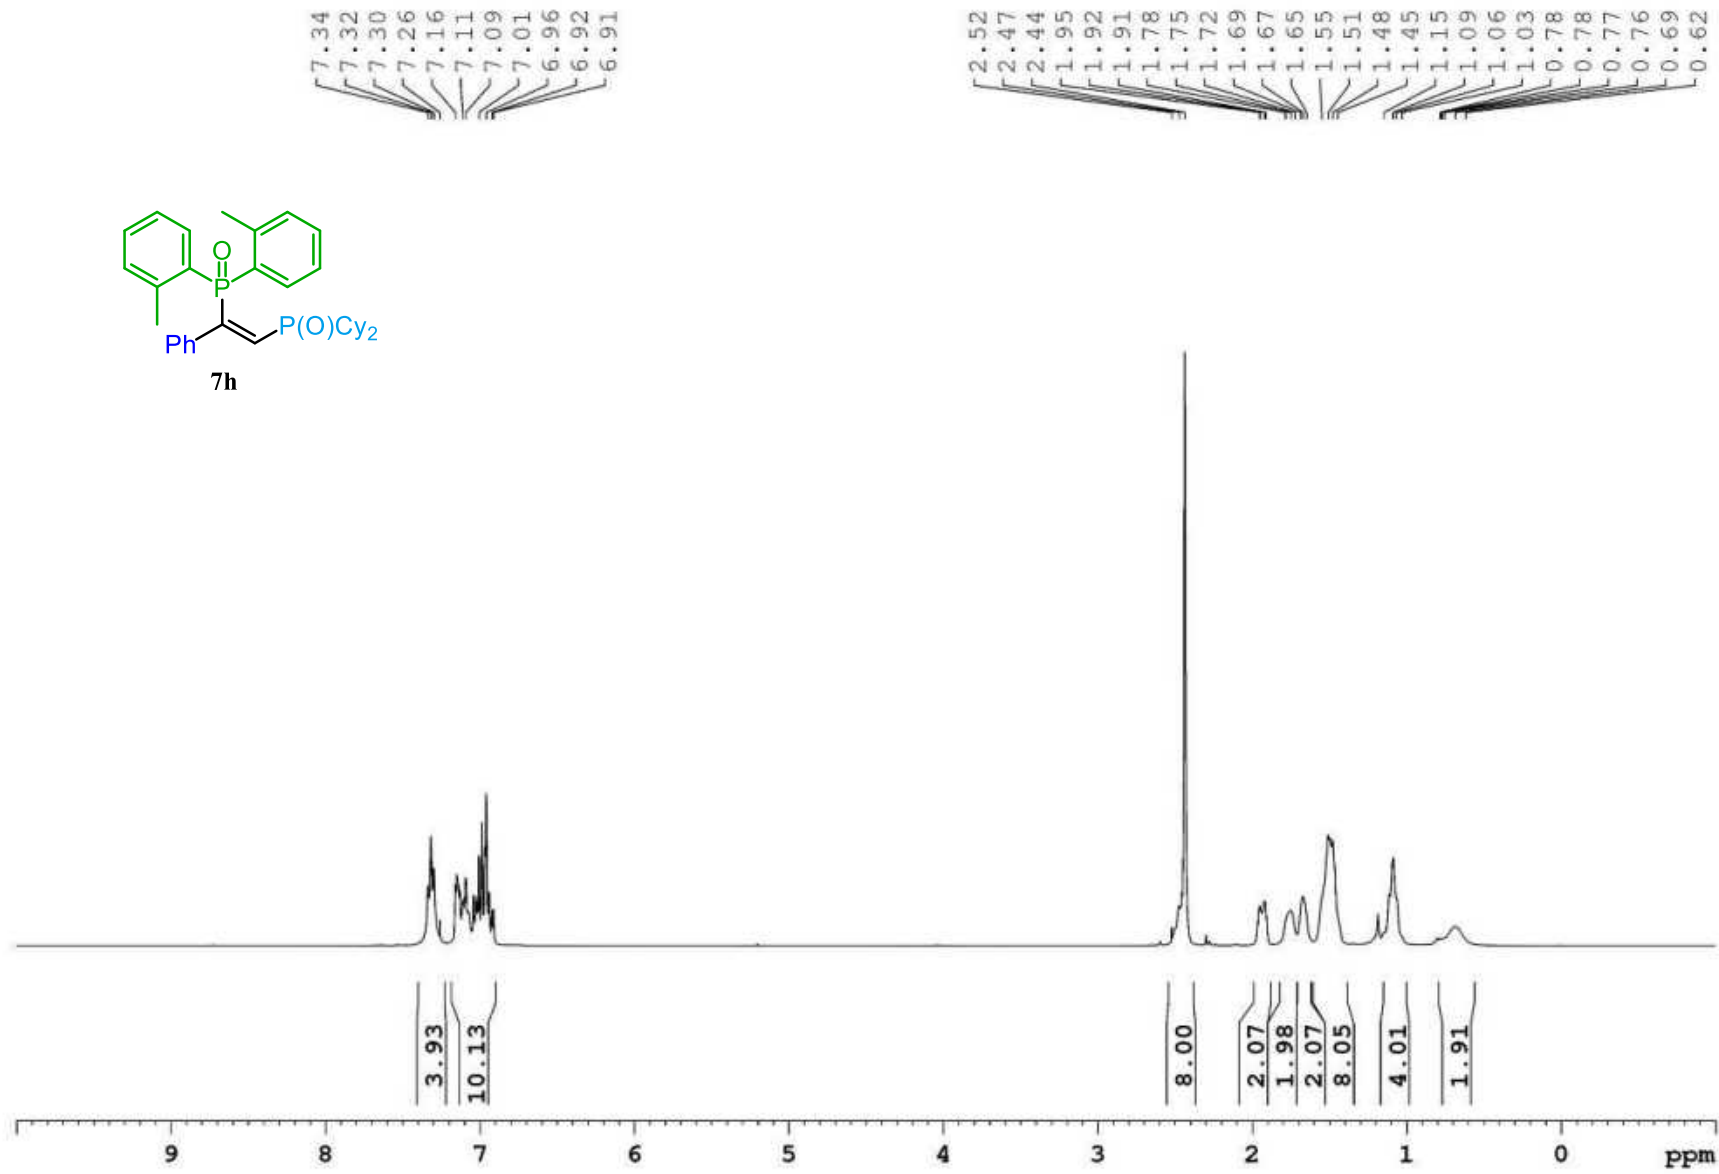

152.54  
151.69  
149.05  
148.33  
143.05  
142.97  
140.15  
140.03  
140.01  
139.89  
133.25  
133.12  
132.25  
132.23  
131.85  
131.75  
130.78  
129.76  
128.37  
128.34  
128.21  
127.81  
125.44  
125.31

38.72  
38.06  
26.60  
26.56  
26.42  
26.28  
26.16  
26.03  
25.76  
21.69  
21.65

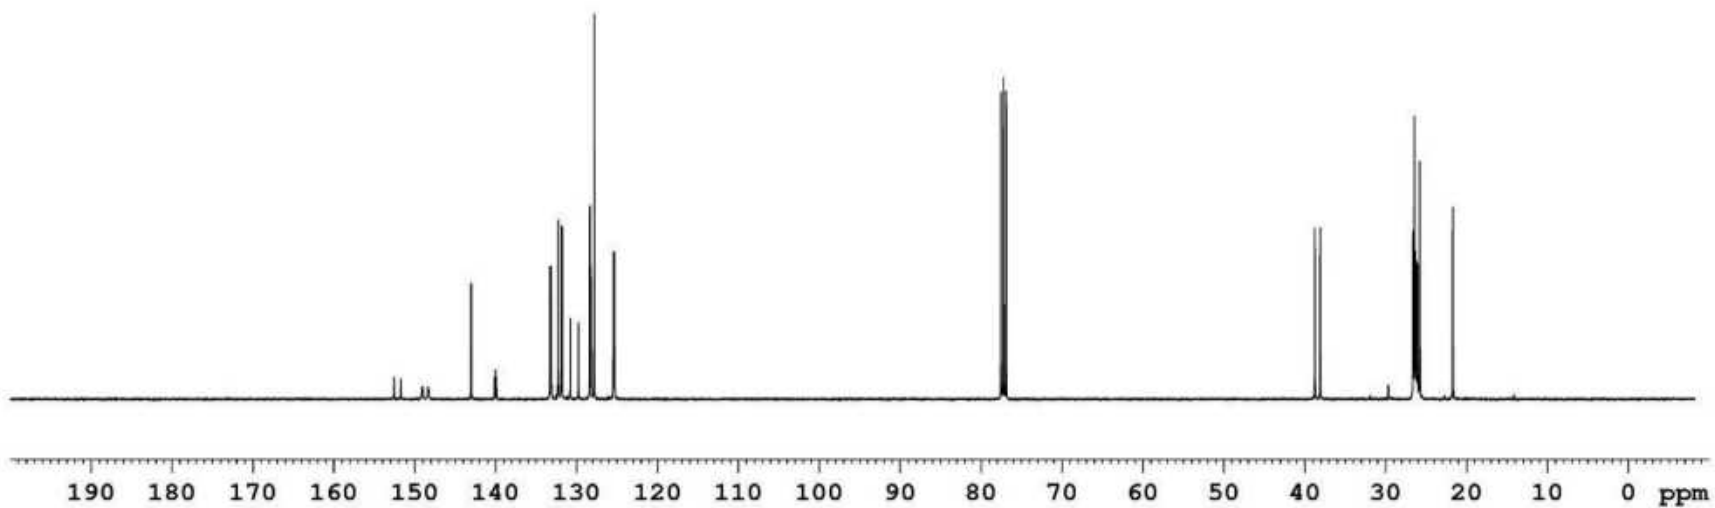



— 49.69

34.27  
34.20

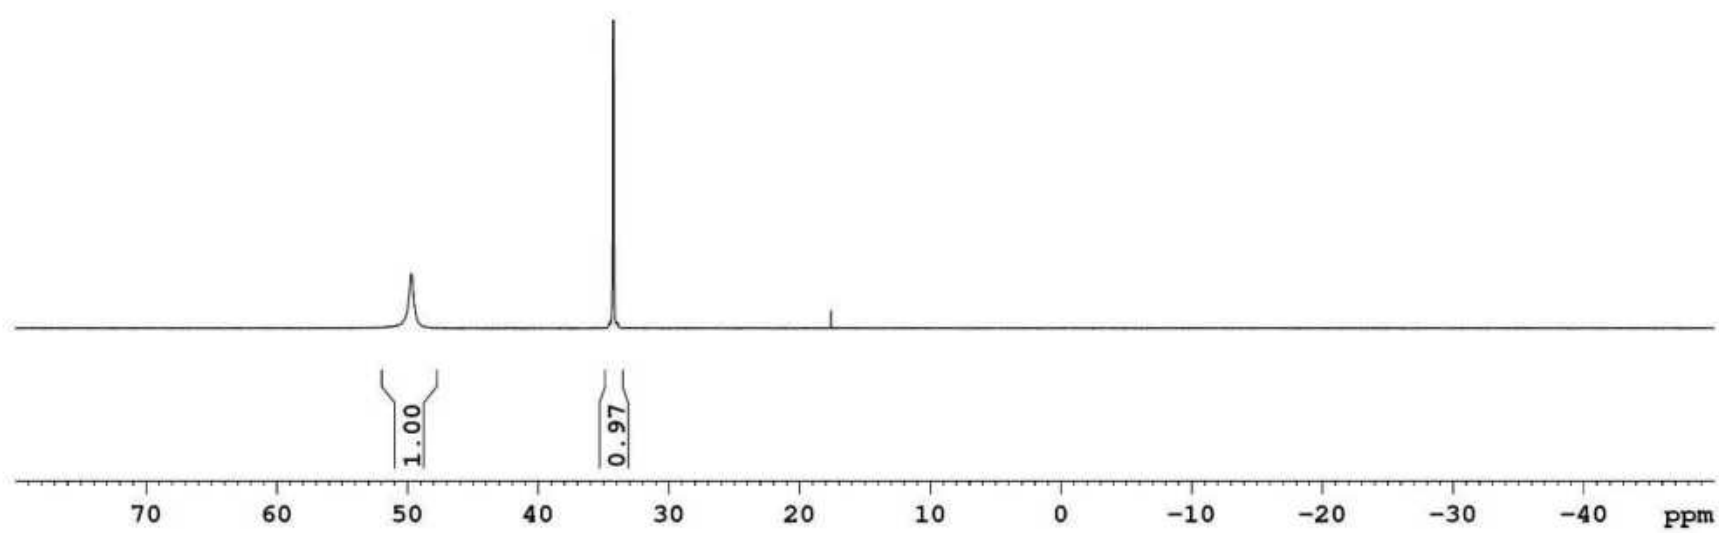

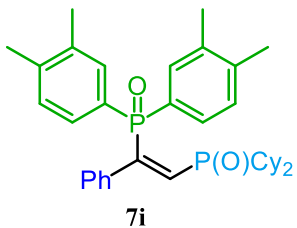

7.33  
7.30  
7.26  
7.21  
7.19  
7.17  
7.16  
7.14  
7.11  
7.09  
7.07  
6.76  
6.74  
6.70  
6.69  
6.60  
6.60

2.91  
2.88  
2.87  
2.86  
2.83  
2.27  
2.20  
2.05  
2.02  
1.93  
1.89  
1.88  
1.82  
1.77  
1.74  
1.66  
1.60  
1.57  
1.54  
1.53  
1.33  
1.31  
1.27  
1.25  
1.23

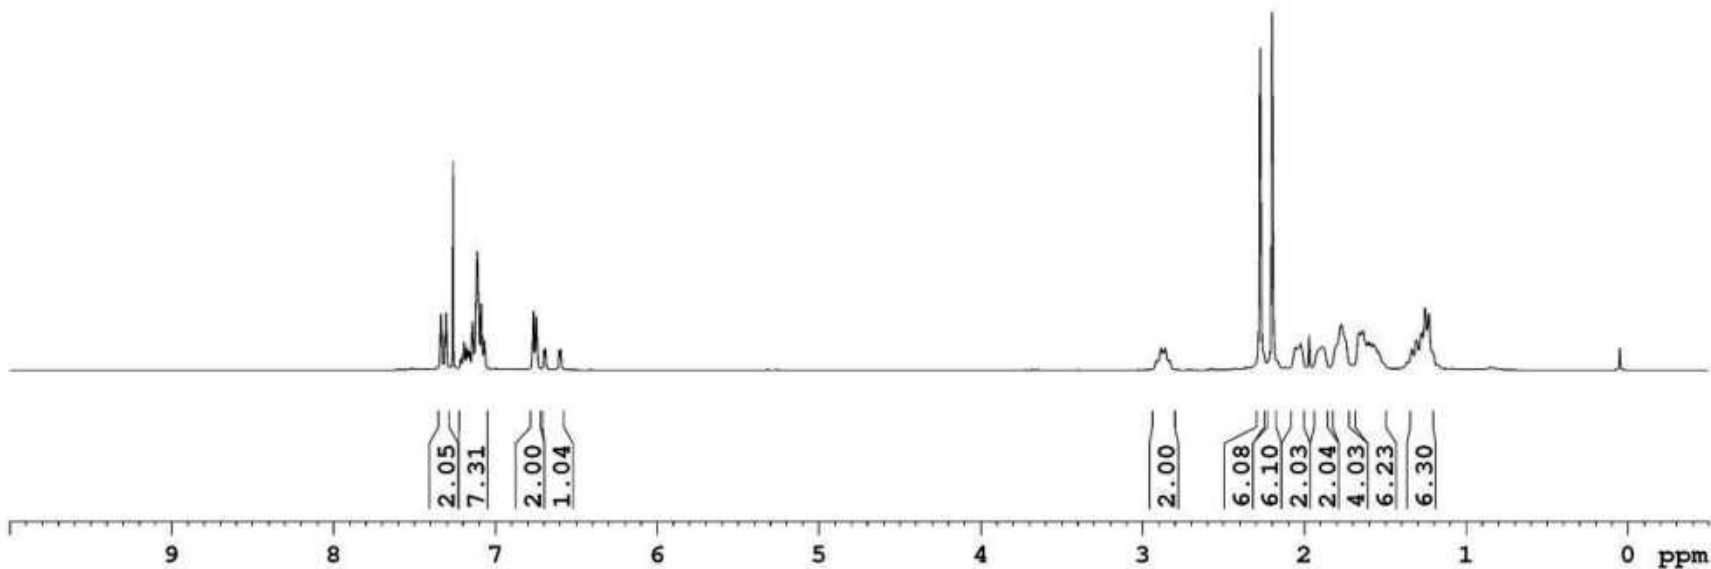

152.10  
151.24  
146.37  
146.30  
145.64  
145.58  
140.52  
140.50  
139.04  
138.91  
138.78  
136.02  
135.90  
132.17  
132.08  
128.79  
128.69  
128.64  
128.51  
128.03  
128.00  
127.40  
127.22  
126.91  
126.35

38.23  
37.57  
25.96  
25.93  
25.61  
25.47  
25.44  
25.41  
25.27  
24.90  
18.97  
18.72

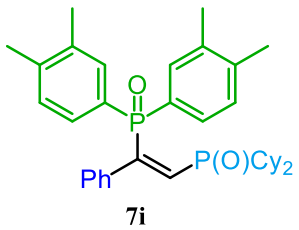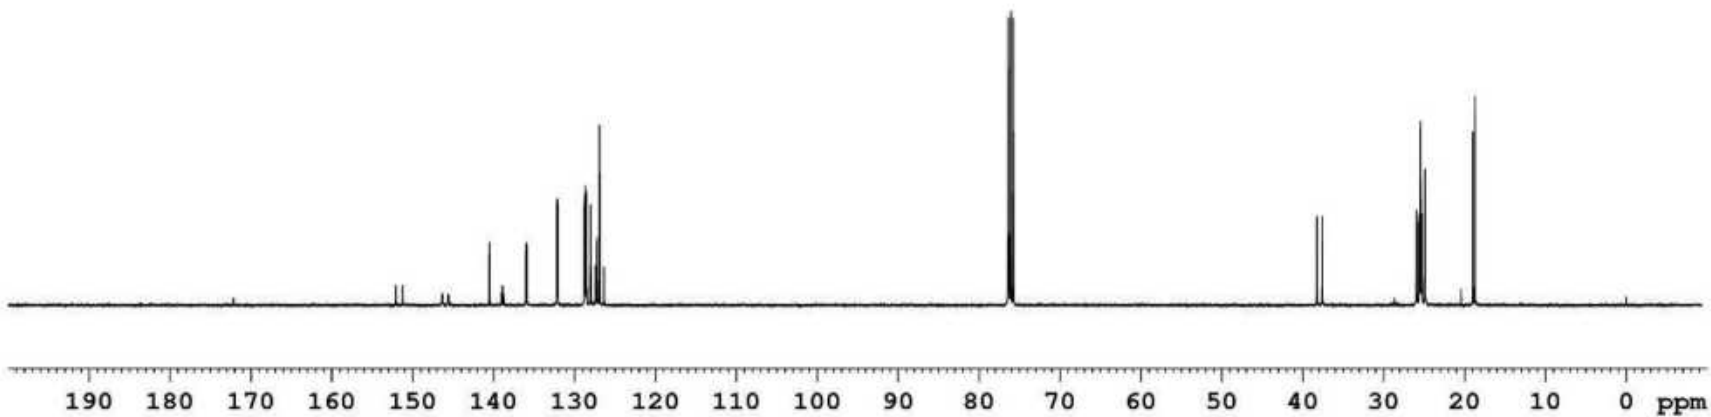

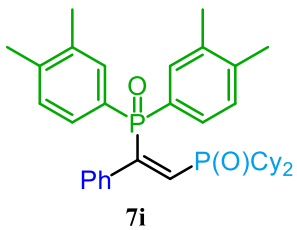

— 52.35

< 24.49  
< 24.43

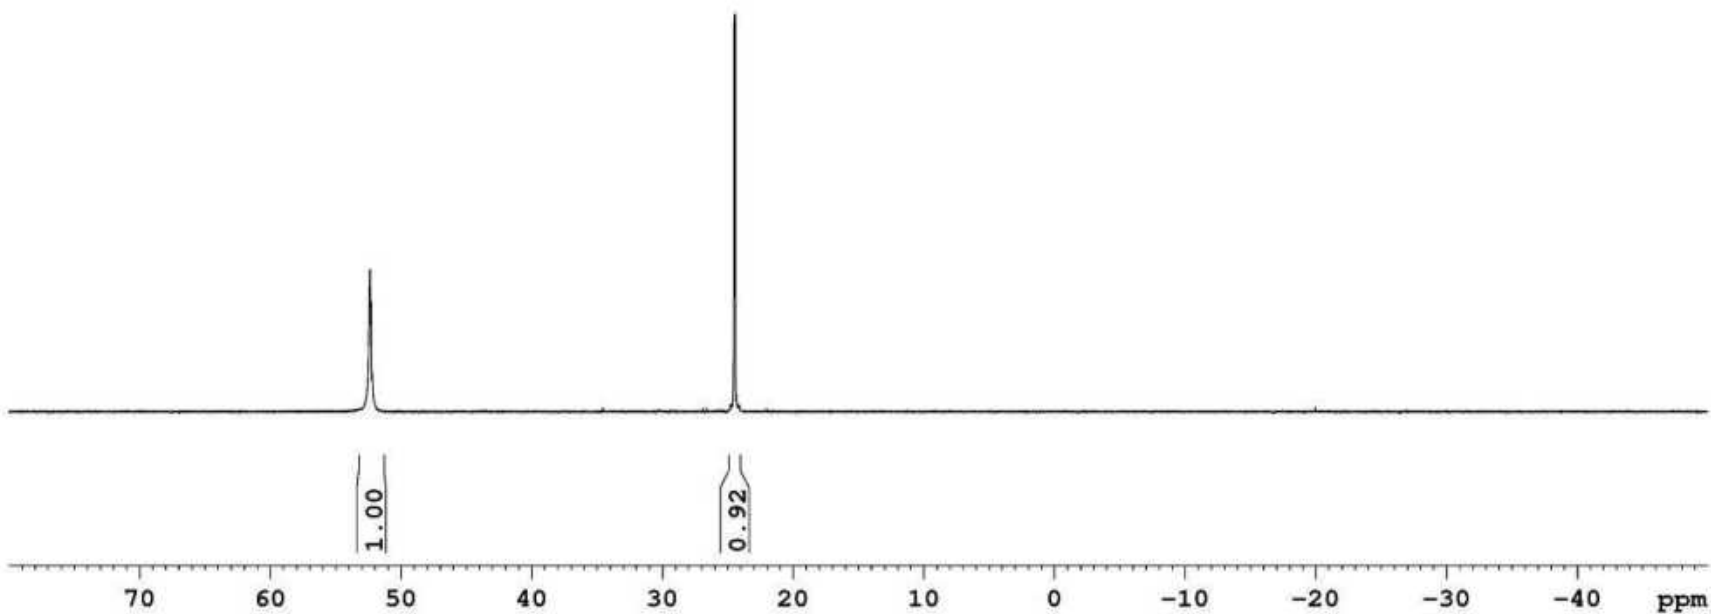

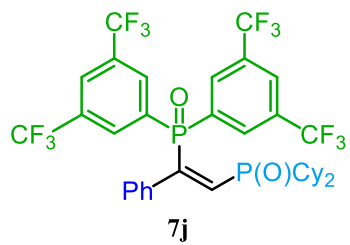

8.12  
8.09  
7.90  
7.26  
7.22  
7.21  
7.03  
7.02  
7.01  
6.85  
6.80  
6.75  
6.70

1.81  
1.76  
1.73  
1.68  
1.30  
1.28  
1.27  
1.19  
1.17

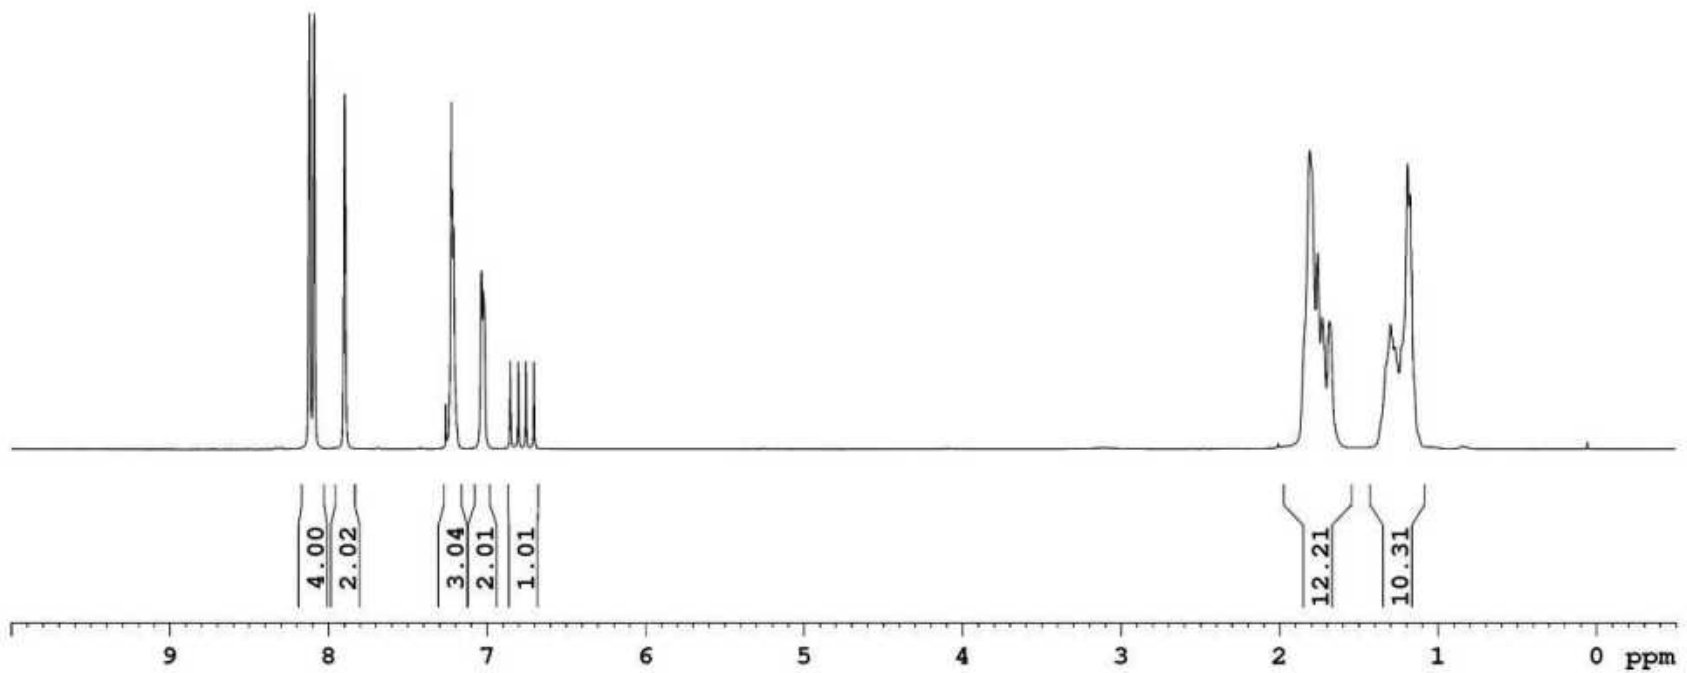

155.26  
154.36  
143.29  
143.19  
142.59  
142.49  
140.22  
140.10  
140.08  
139.97  
137.54  
136.48  
132.19  
132.06  
131.85  
131.72  
131.51  
131.46  
131.39  
131.18  
131.05  
128.80  
128.71  
127.78  
127.74  
126.82  
125.40  
125.32  
125.29  
125.21  
124.11  
121.39  
118.67

37.11  
36.43  
26.45  
26.32  
26.27  
26.24  
26.12  
25.64  
25.31  
25.28

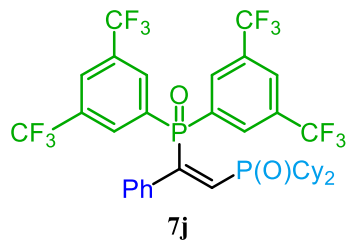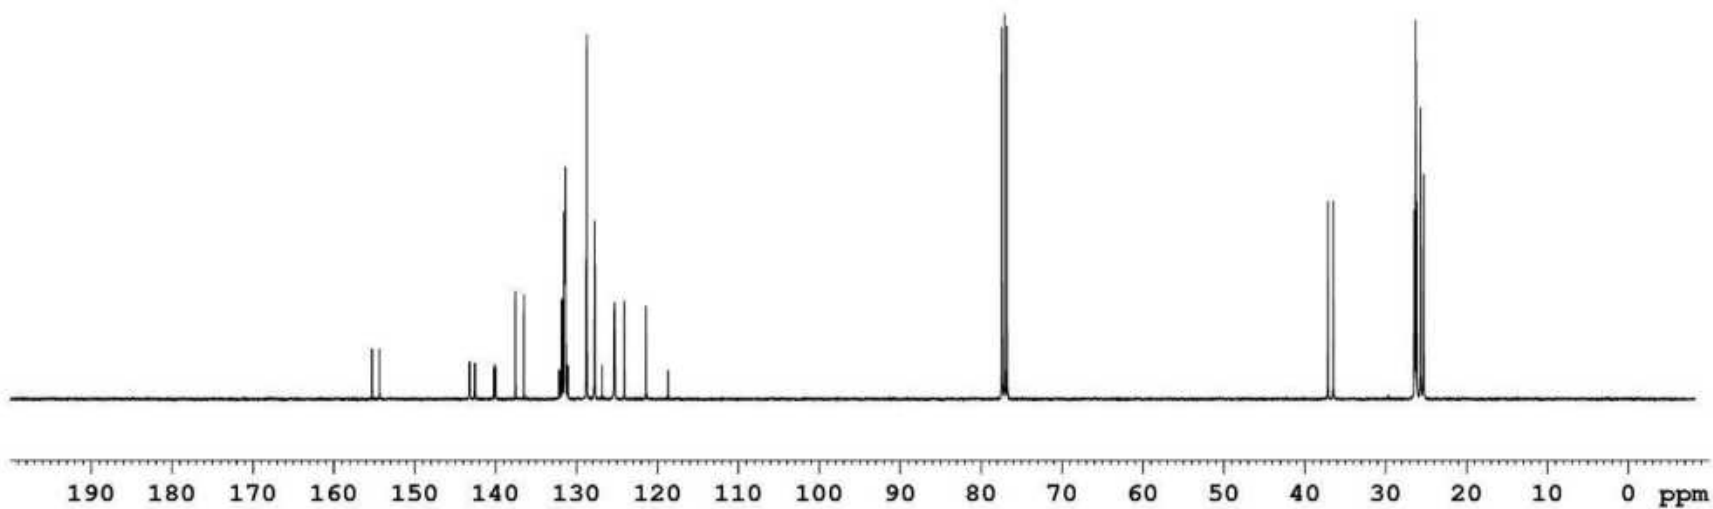



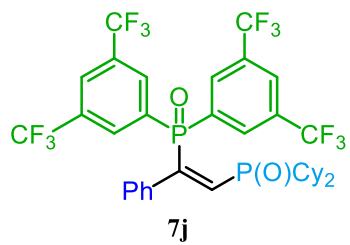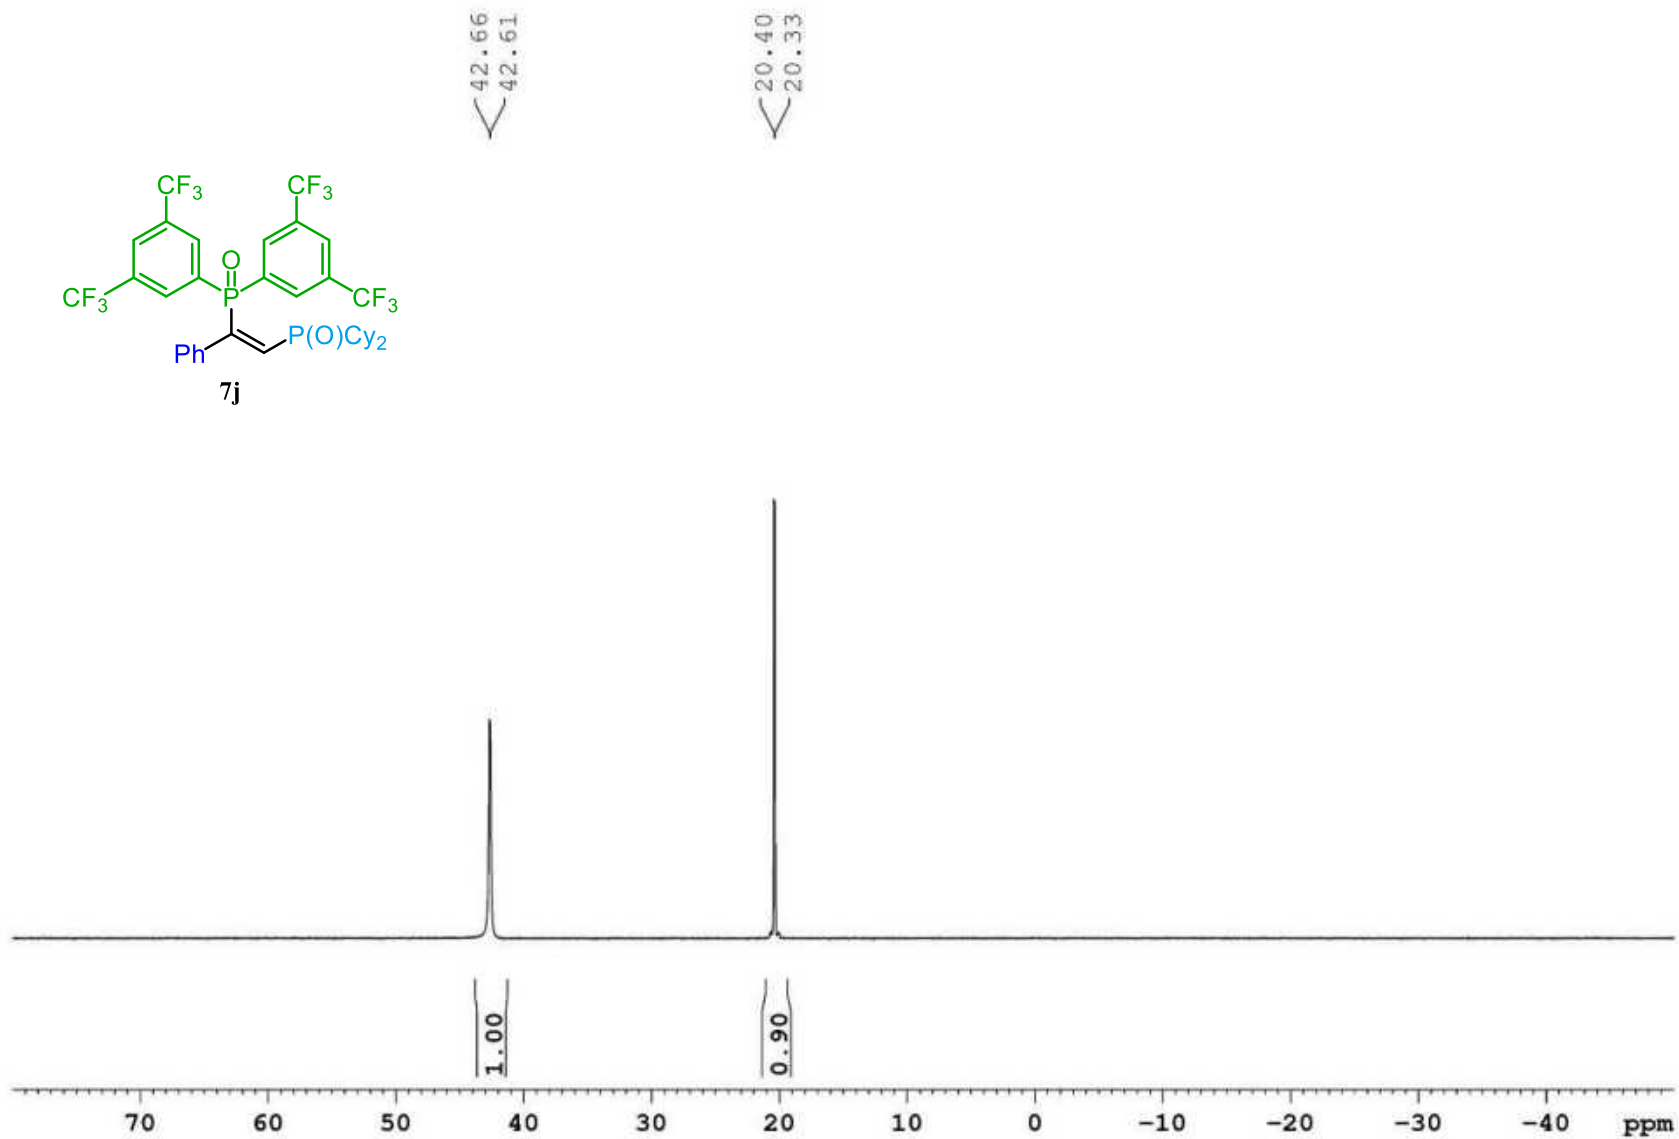

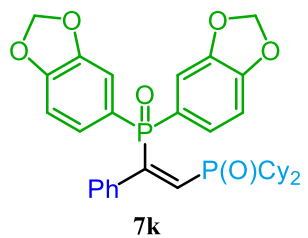

7.26  
7.19  
7.17  
7.16  
7.11  
7.10  
7.07  
7.05  
7.05  
7.04  
7.04  
7.02  
7.02  
6.85  
6.85  
6.83  
6.82  
6.79  
6.78  
6.77  
6.76  
6.75  
6.64  
6.63  
6.55  
6.53  
5.94

2.67  
2.61  
2.55  
1.97  
1.96  
1.96  
1.94  
1.91  
1.83  
1.79  
1.72  
1.62  
1.47  
1.24  
1.20  
1.18  
1.17  
1.14  
1.11

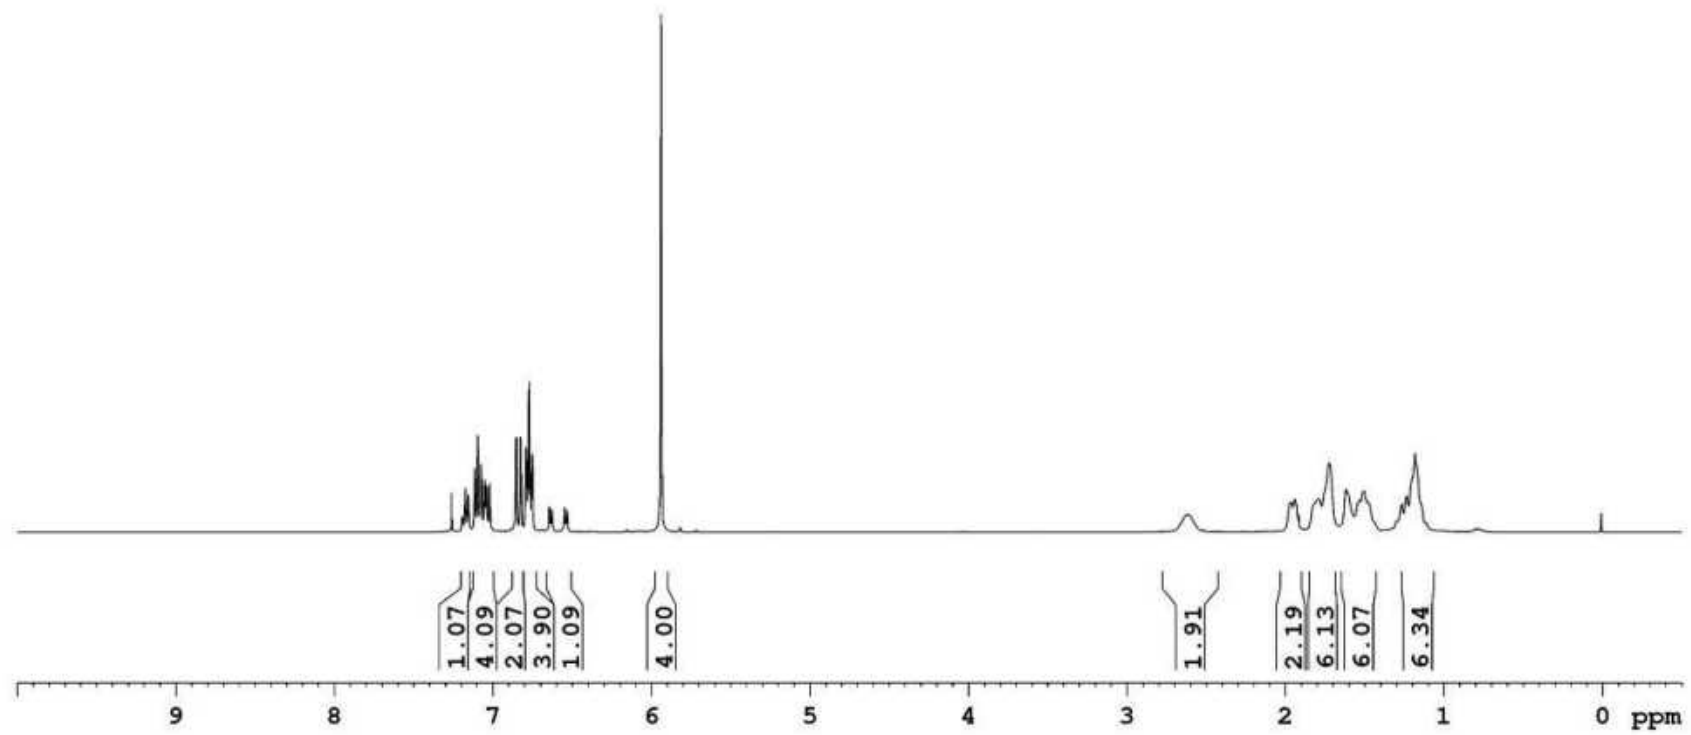

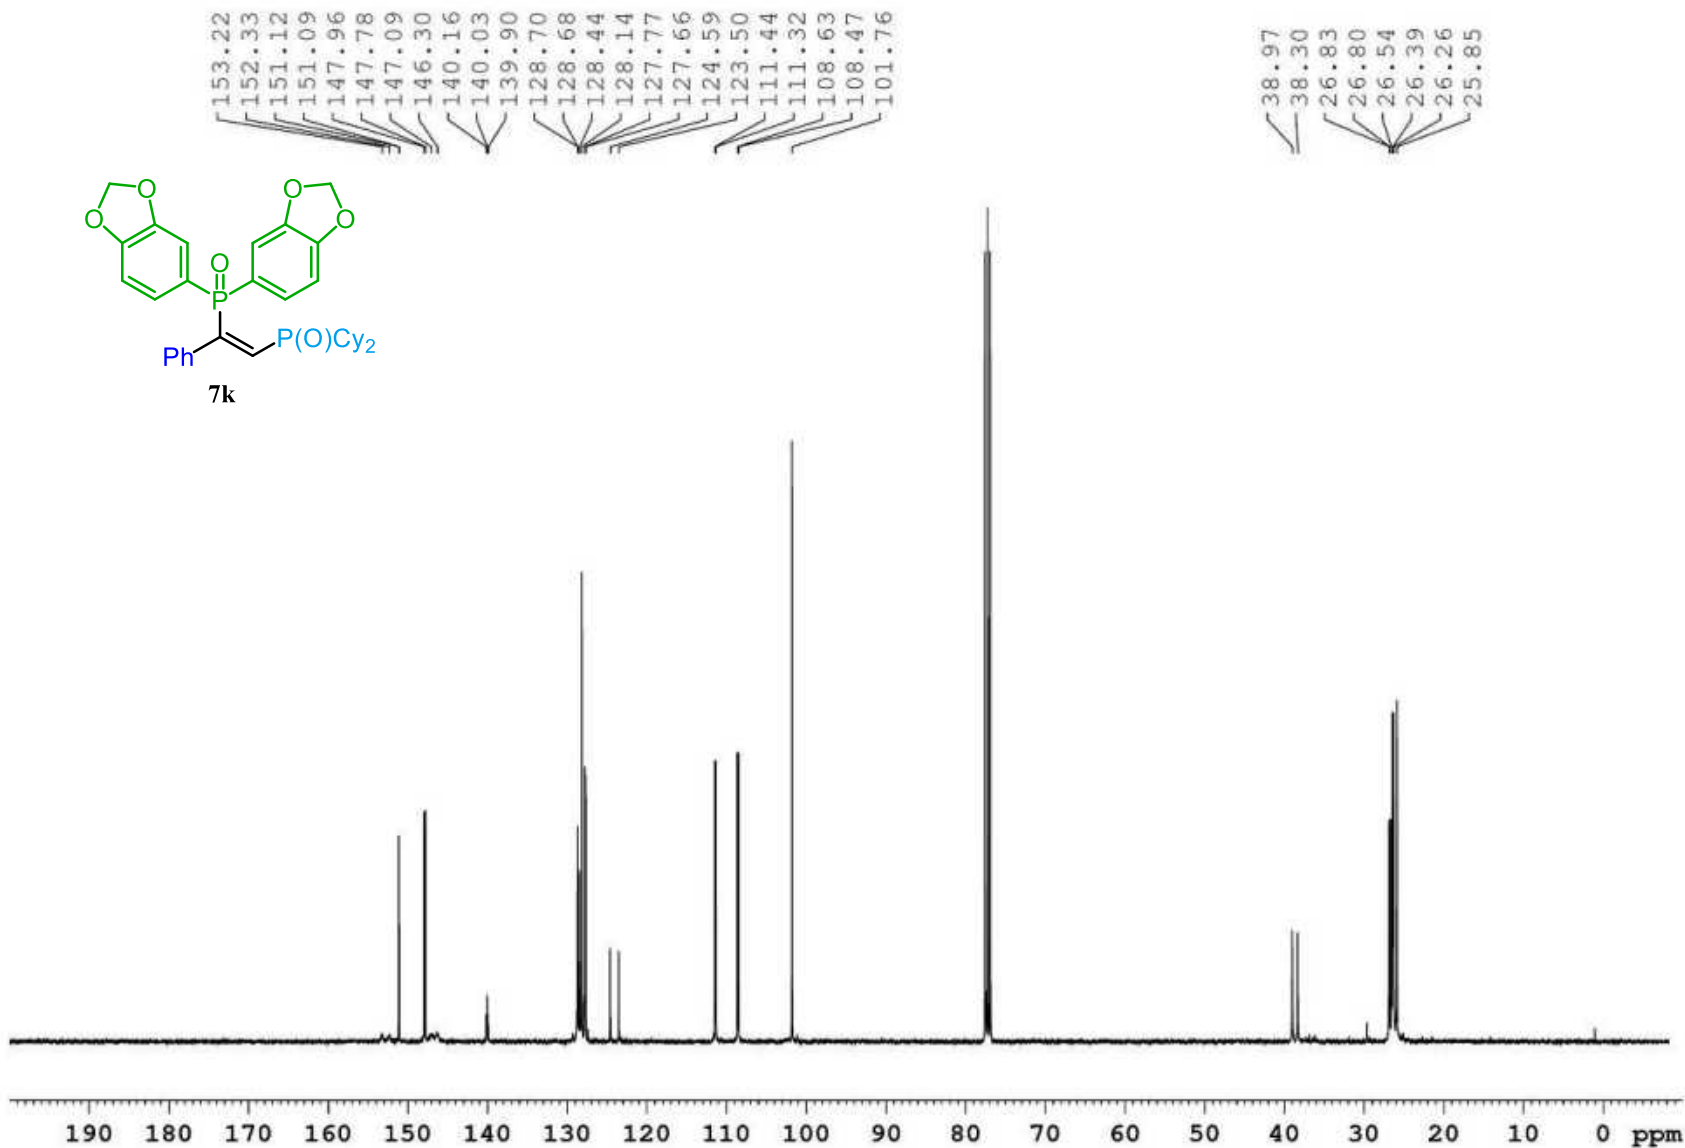

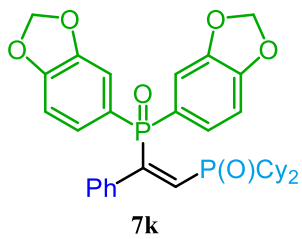

— 50.44

— 24.40

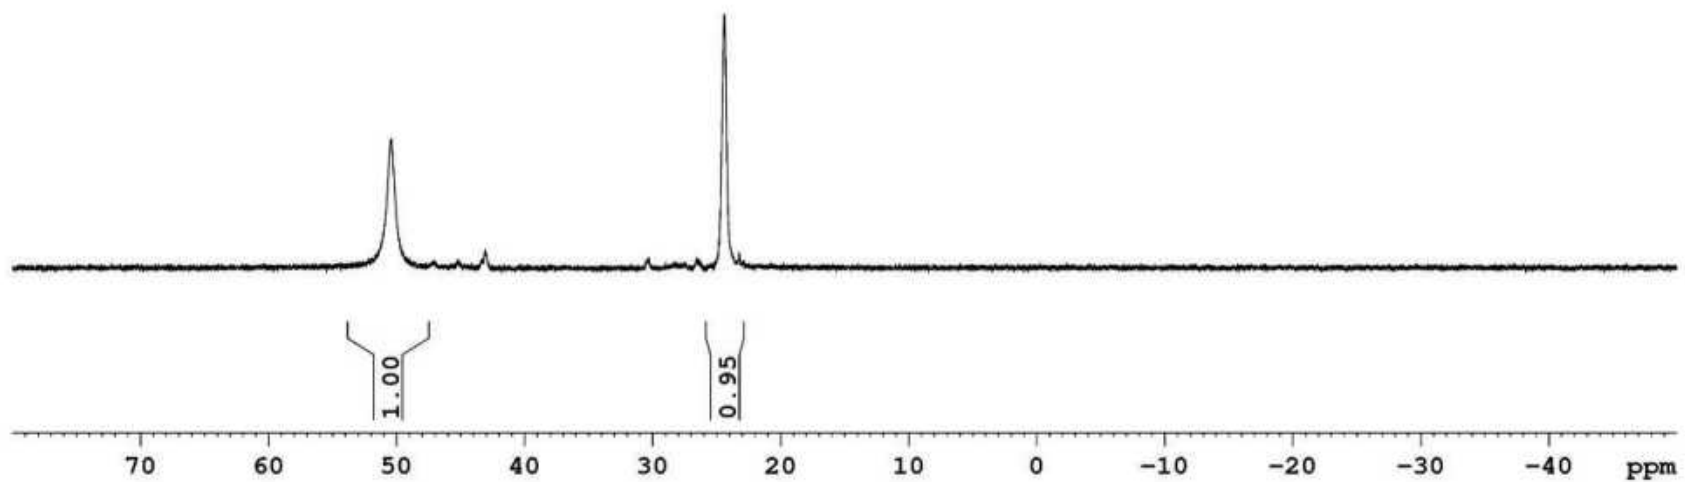

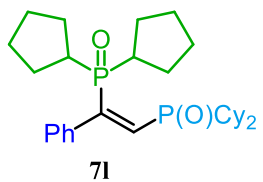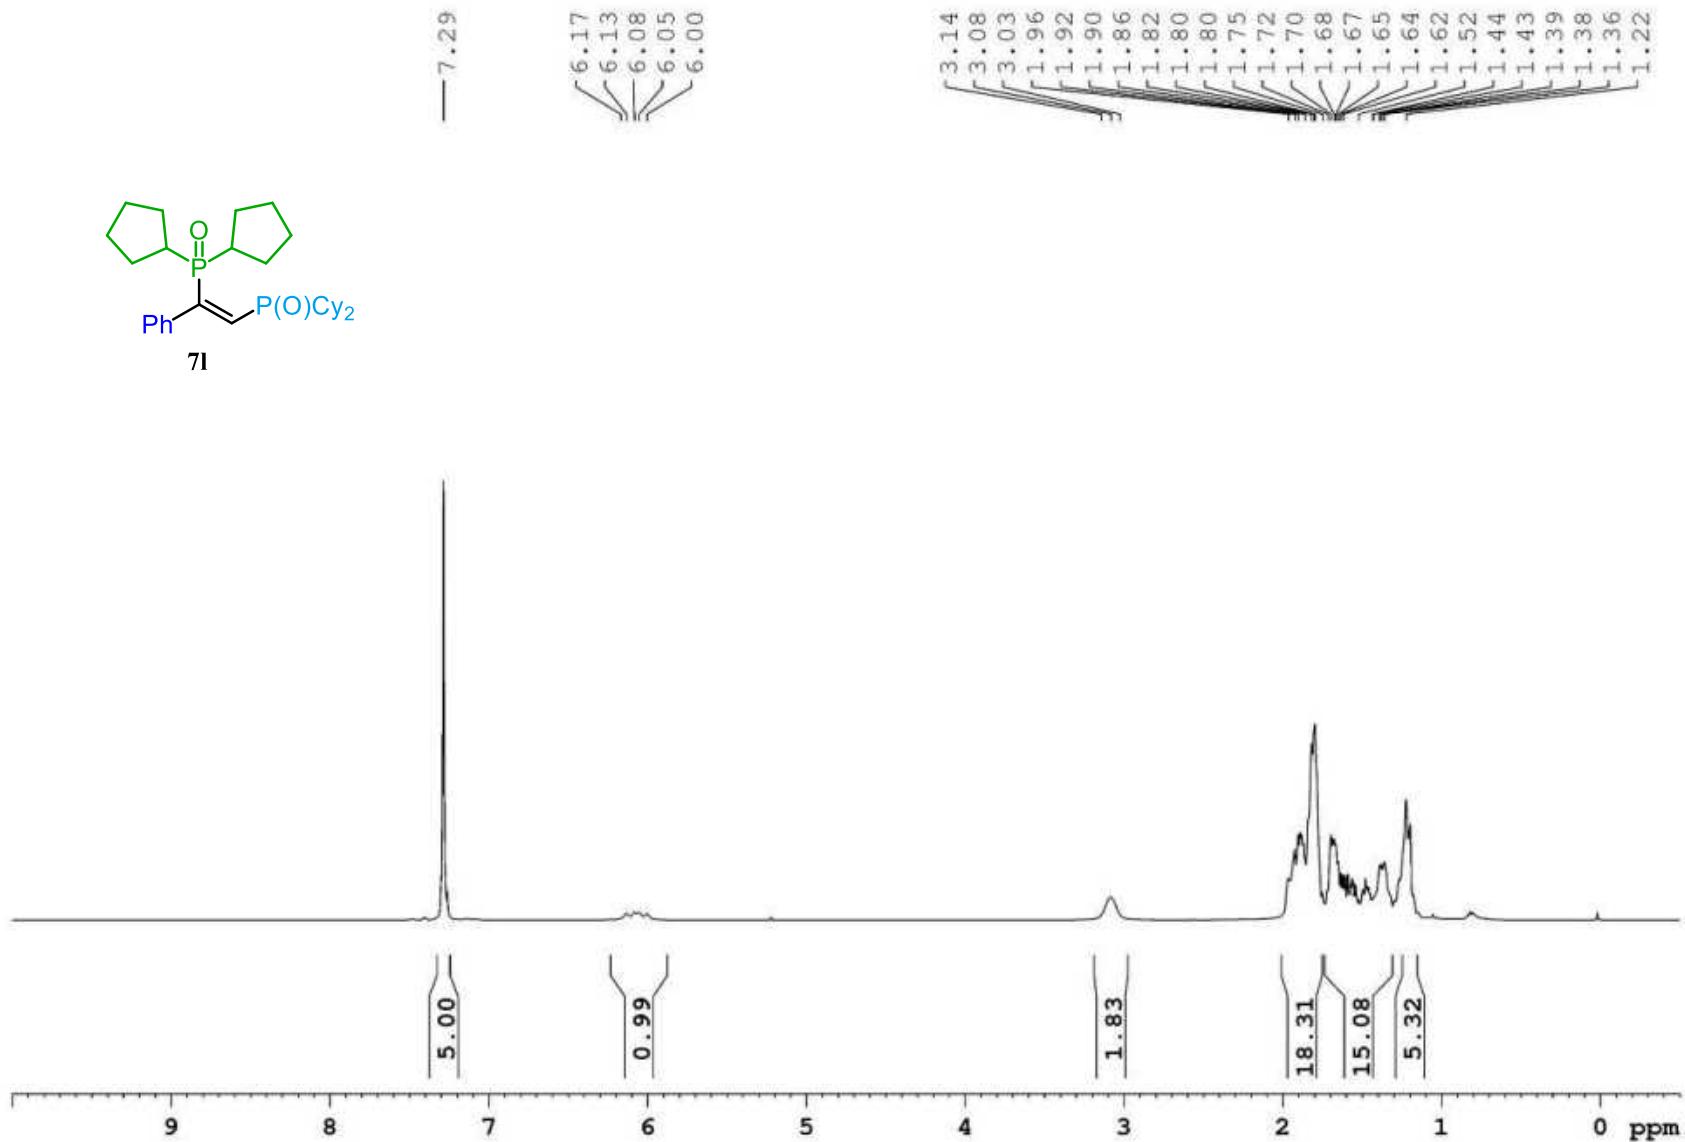

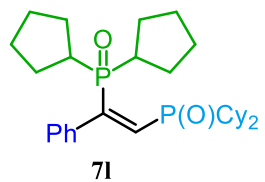

161.88  
161.32

142.24  
133.97  
133.24  
128.45  
128.24  
127.92

40.16  
39.47  
37.35  
36.67  
27.84  
27.82  
26.60  
26.44  
26.41  
26.34  
26.31  
25.86  
25.80  
25.75  
25.29  
25.26

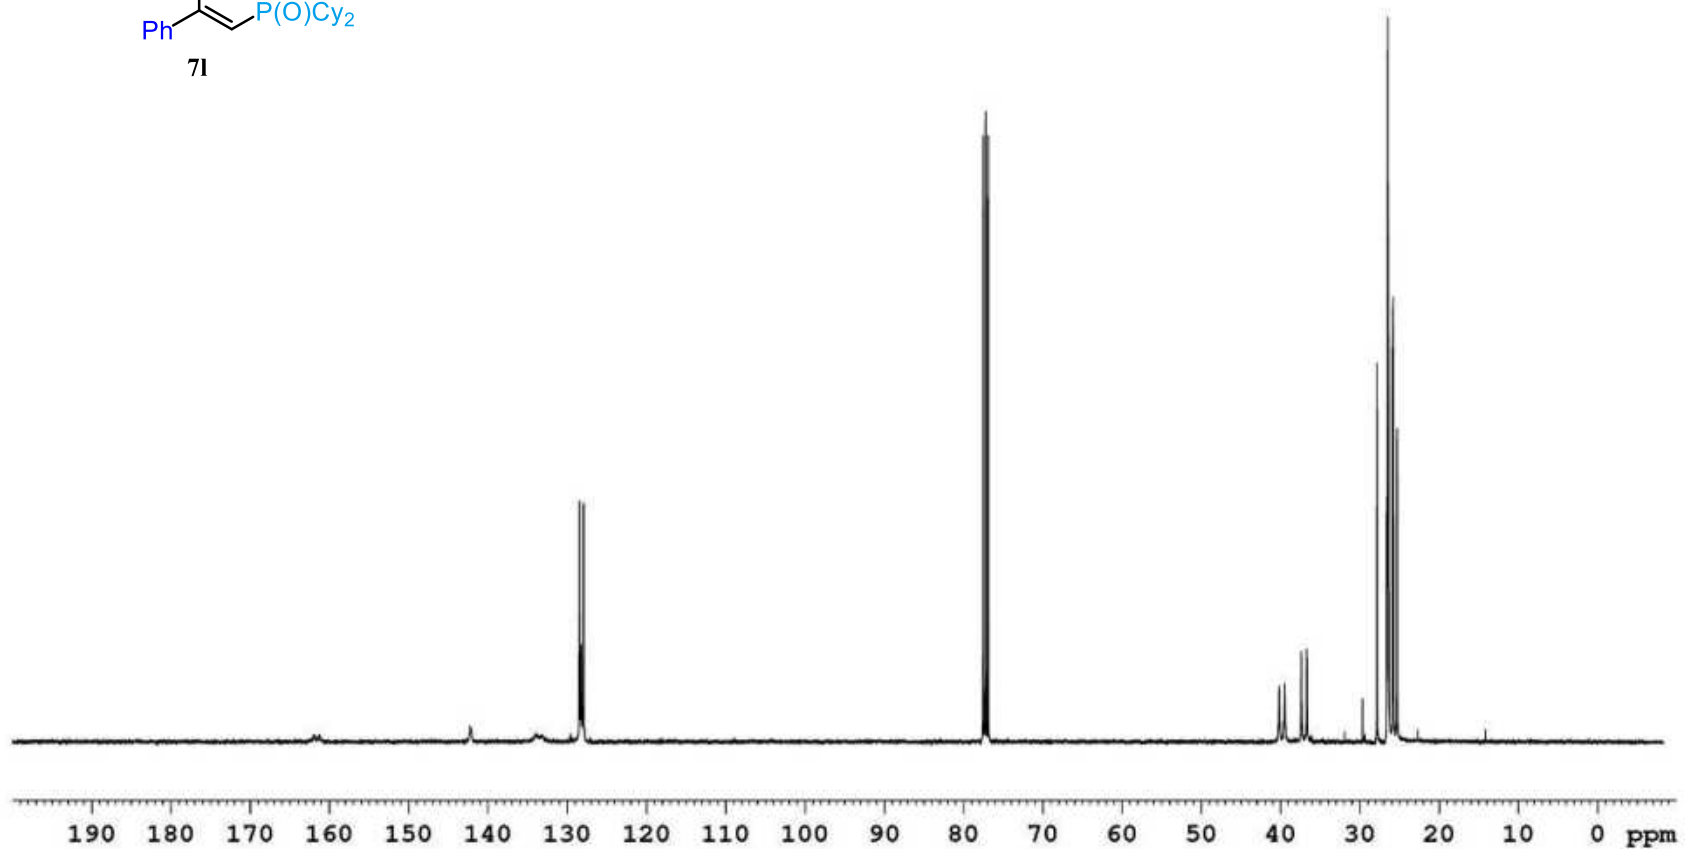



— 45.97  
— 43.13

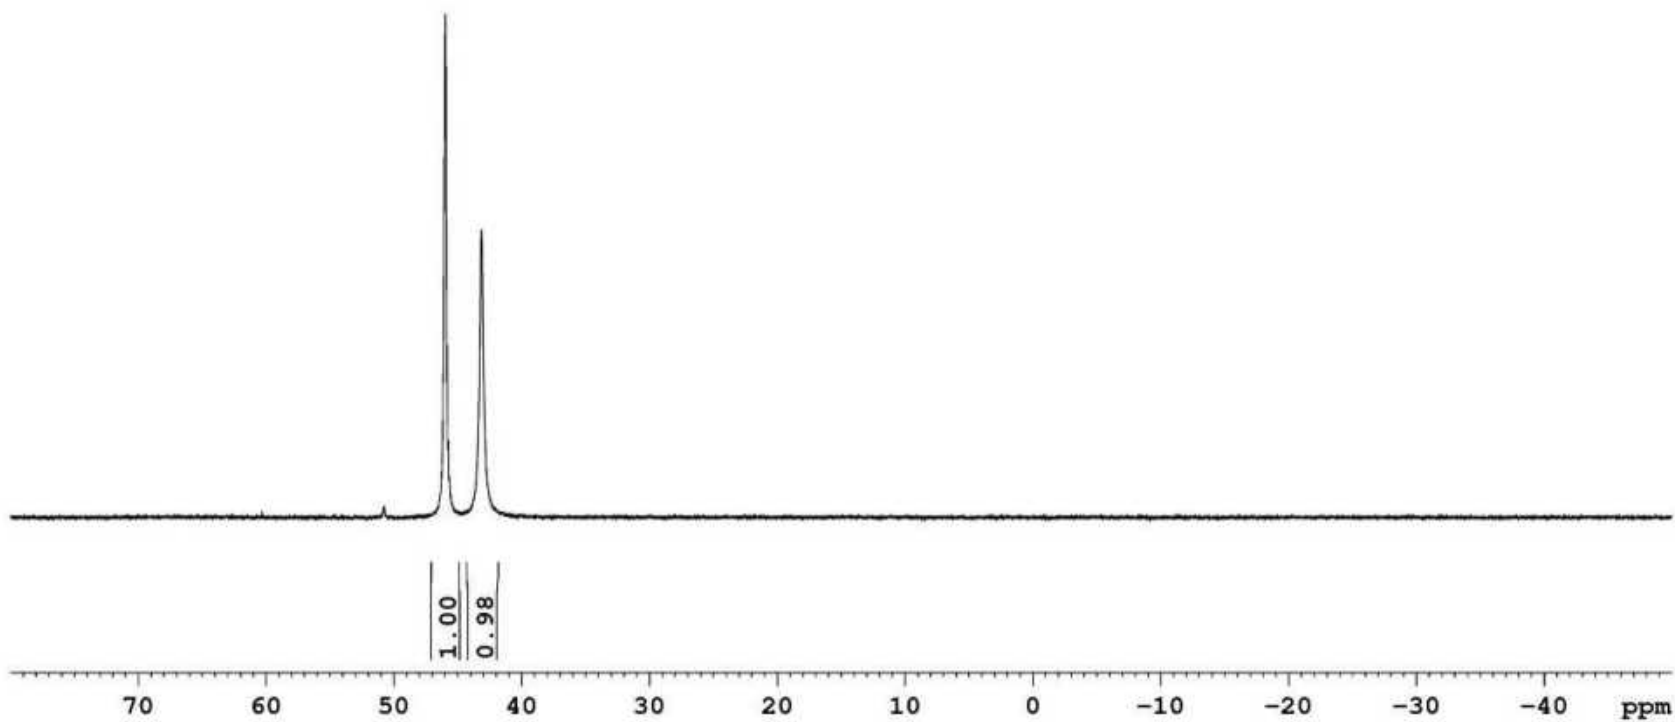

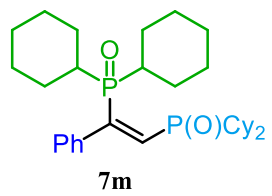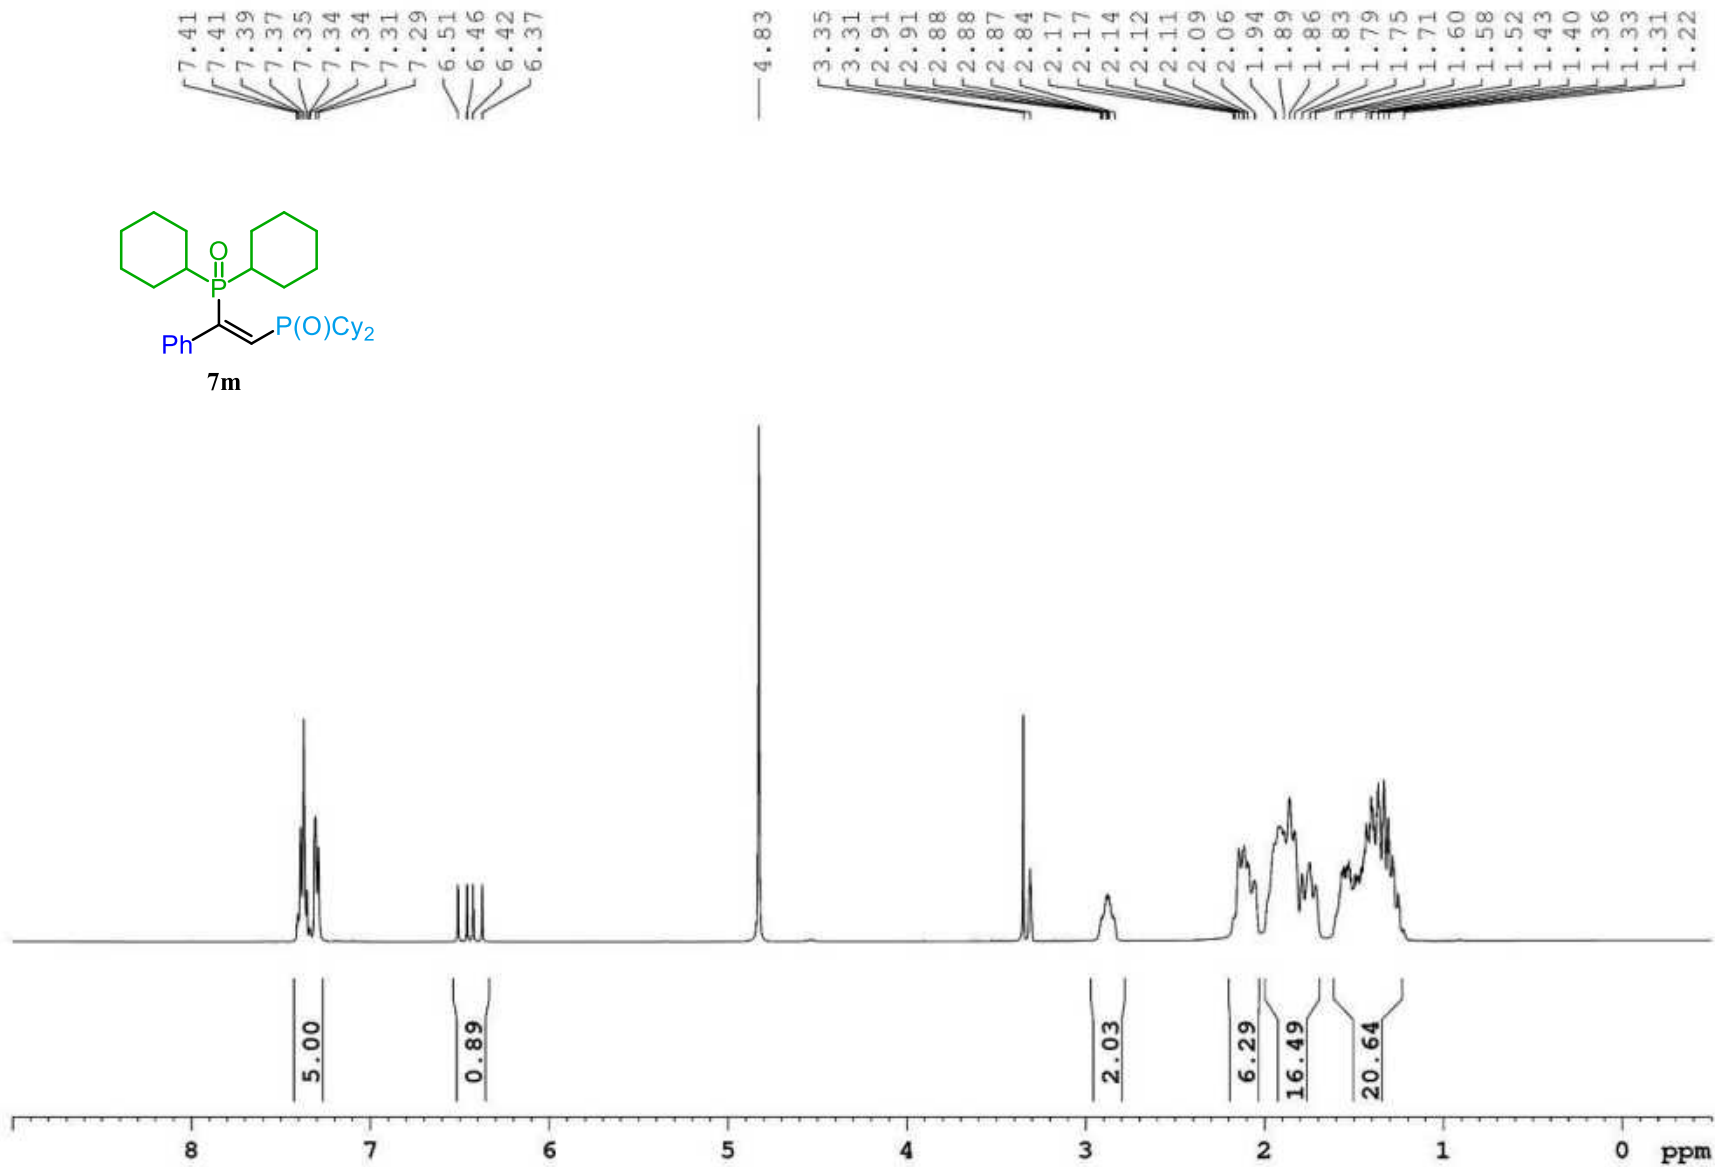





159.49  
158.84  
141.76  
141.70  
141.61  
141.54  
135.59  
134.83  
128.36  
128.33  
128.12  
127.79

39.68  
39.05  
37.22  
36.54  
26.52  
26.48  
26.39  
26.35  
26.17  
26.05  
26.01  
25.92  
25.88  
25.62  
25.61  
25.47

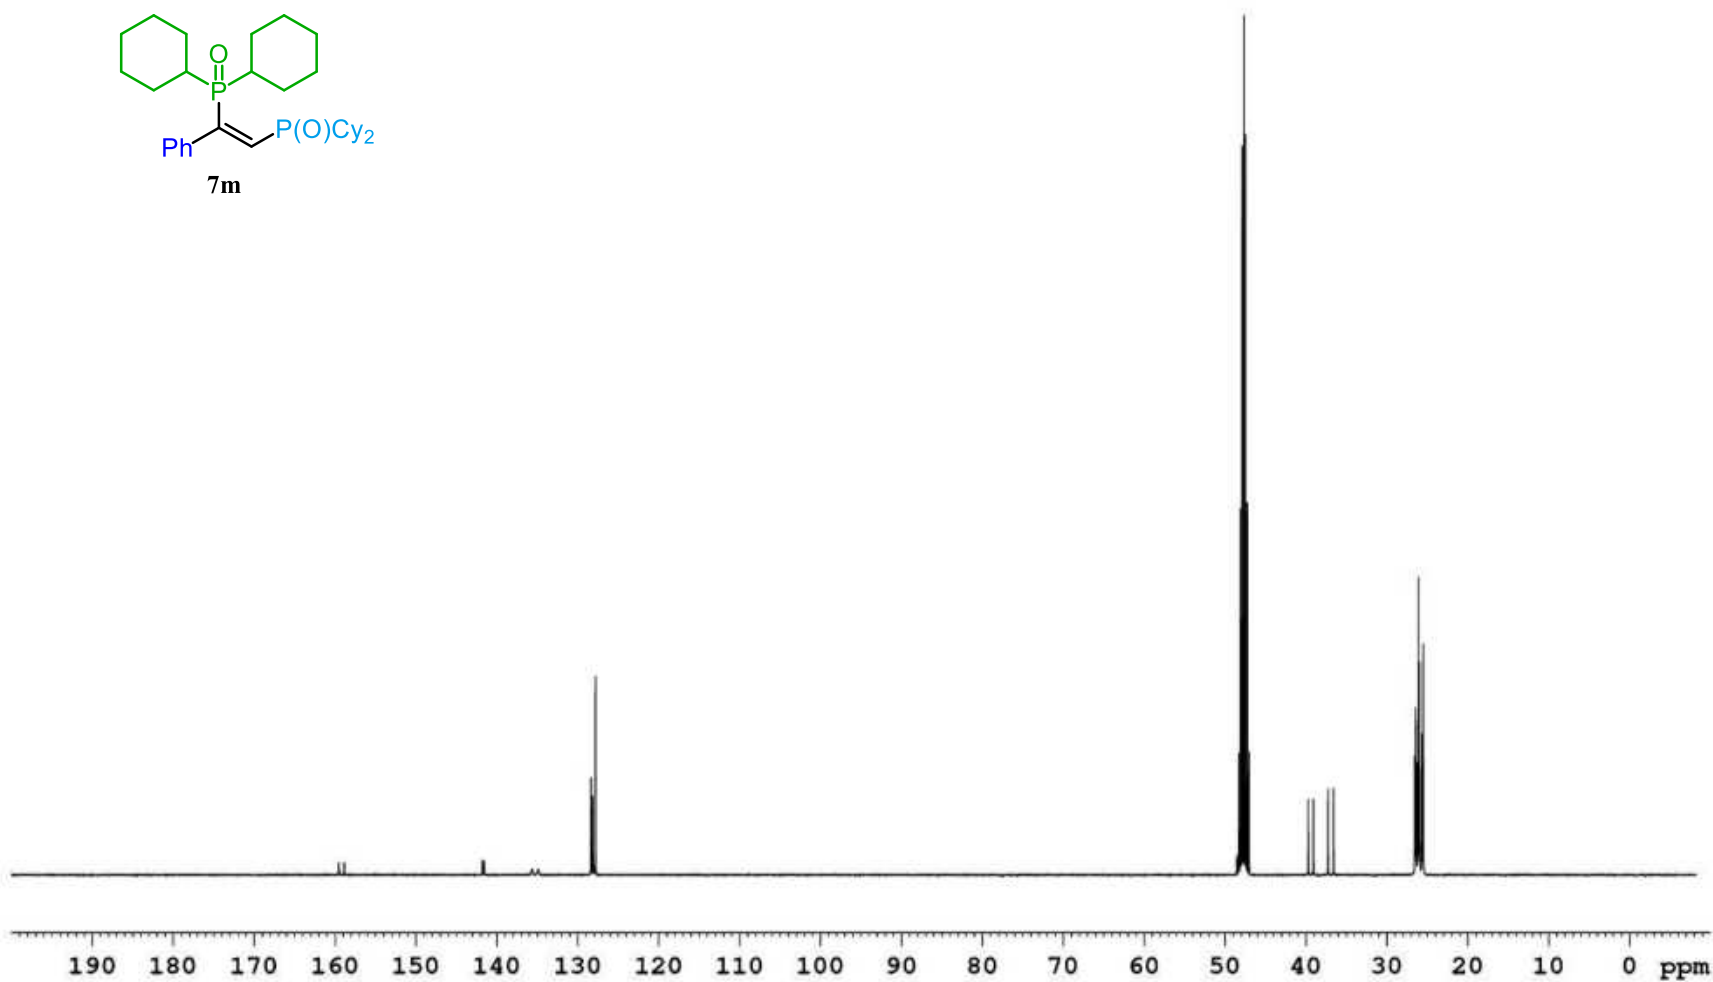



52.66  
52.59

46.43  
46.39

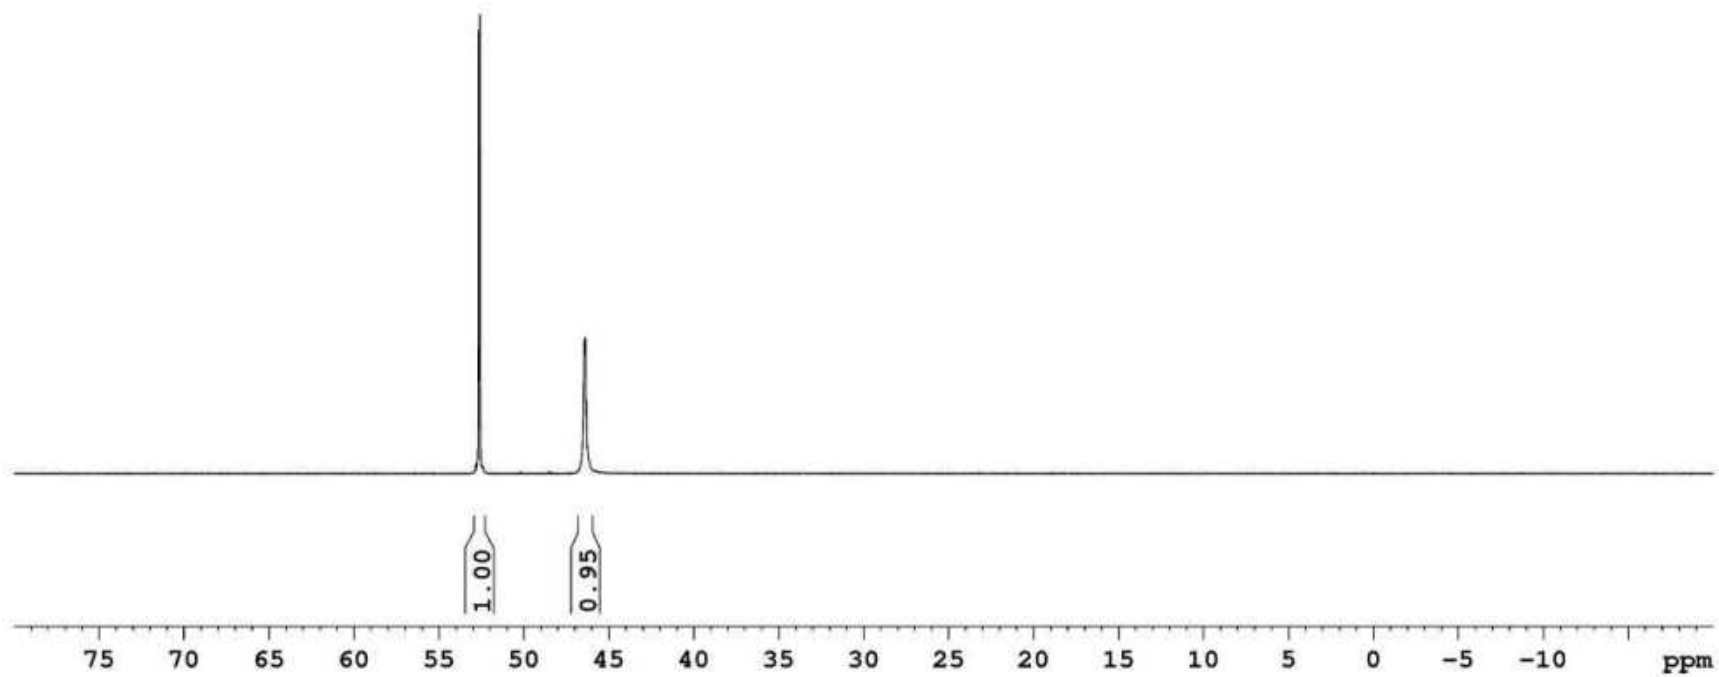

7.42  
7.40  
7.38  
7.34  
7.32  
7.31  
7.26  
7.24  
7.22  
7.20  
7.18  
7.16  
6.94  
6.92  
6.30  
6.28  
6.21  
6.19

2.99  
2.90  
2.42  
2.36  
2.21  
2.18  
1.96  
1.94  
1.89  
1.80  
1.75  
1.66  
1.58  
1.49  
1.46  
1.43  
1.35  
1.33  
1.22  
1.19  
1.16  
1.10  
1.08  
1.02  
0.98  
0.96  
0.89  
0.87

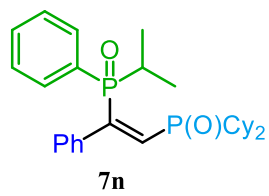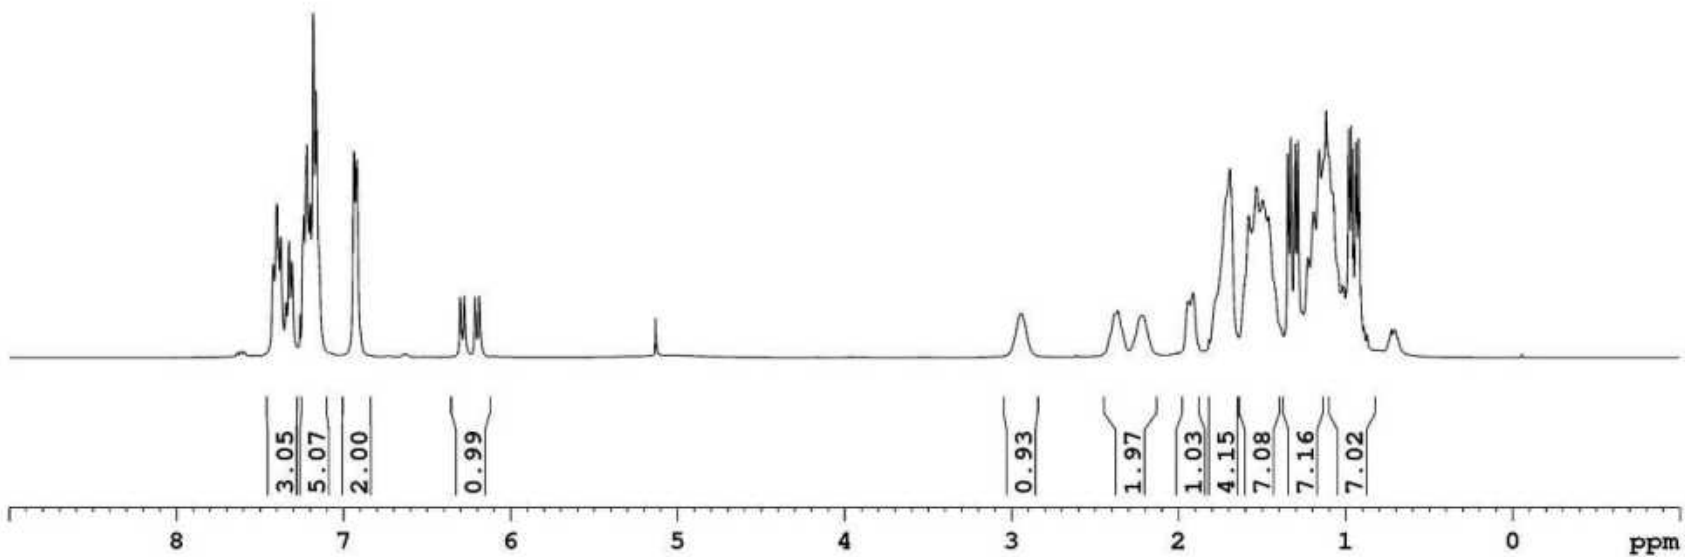

155.53  
154.78  
143.21  
142.48  
140.41  
140.27  
140.16  
131.93  
131.85  
131.67  
131.65  
131.14  
130.20  
128.34  
128.13  
128.02  
127.90

38.83  
38.16  
37.81  
37.14  
26.59  
26.46  
26.37  
26.29  
26.24  
26.21  
26.18  
26.08  
25.95  
25.92  
25.78  
25.71  
25.64  
25.08  
15.55  
15.52  
14.89  
14.86

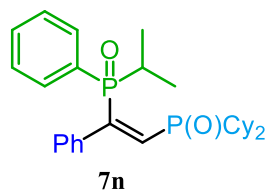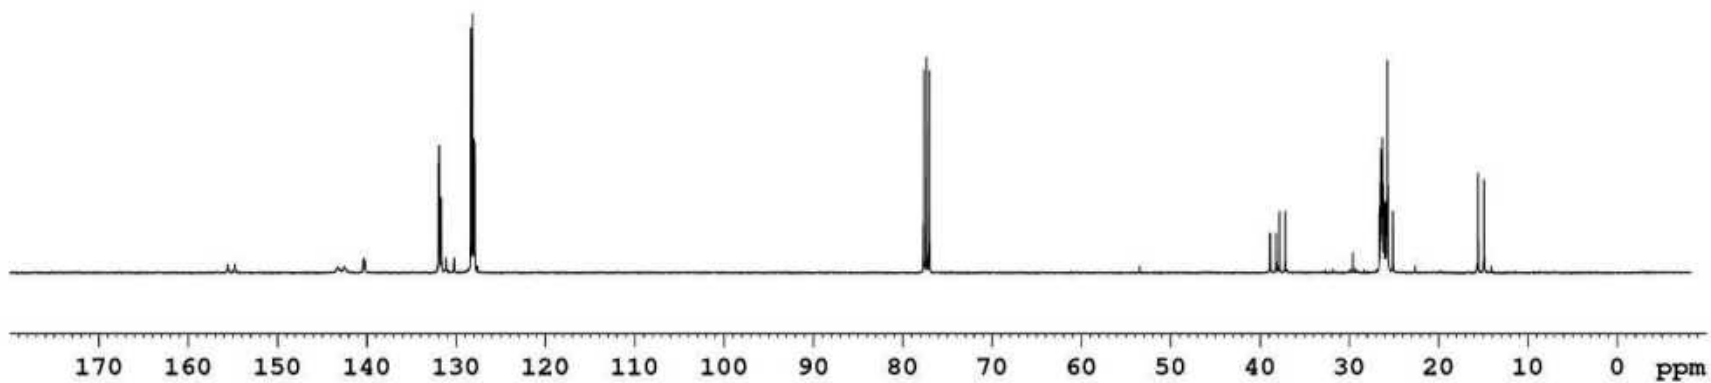

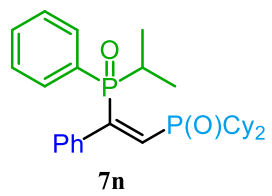

— 48.43

< 37.67  
< 37.60

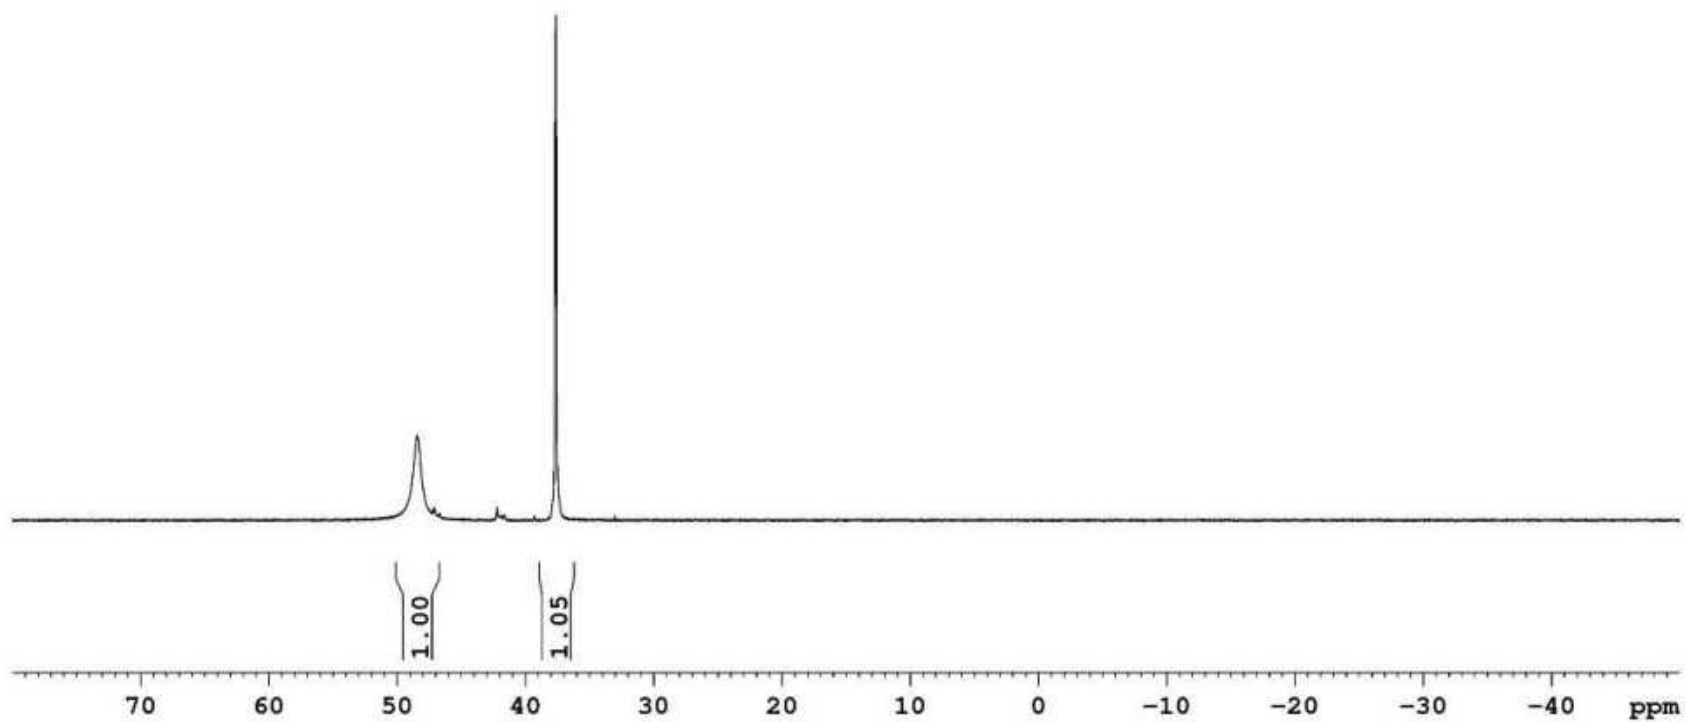

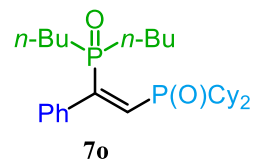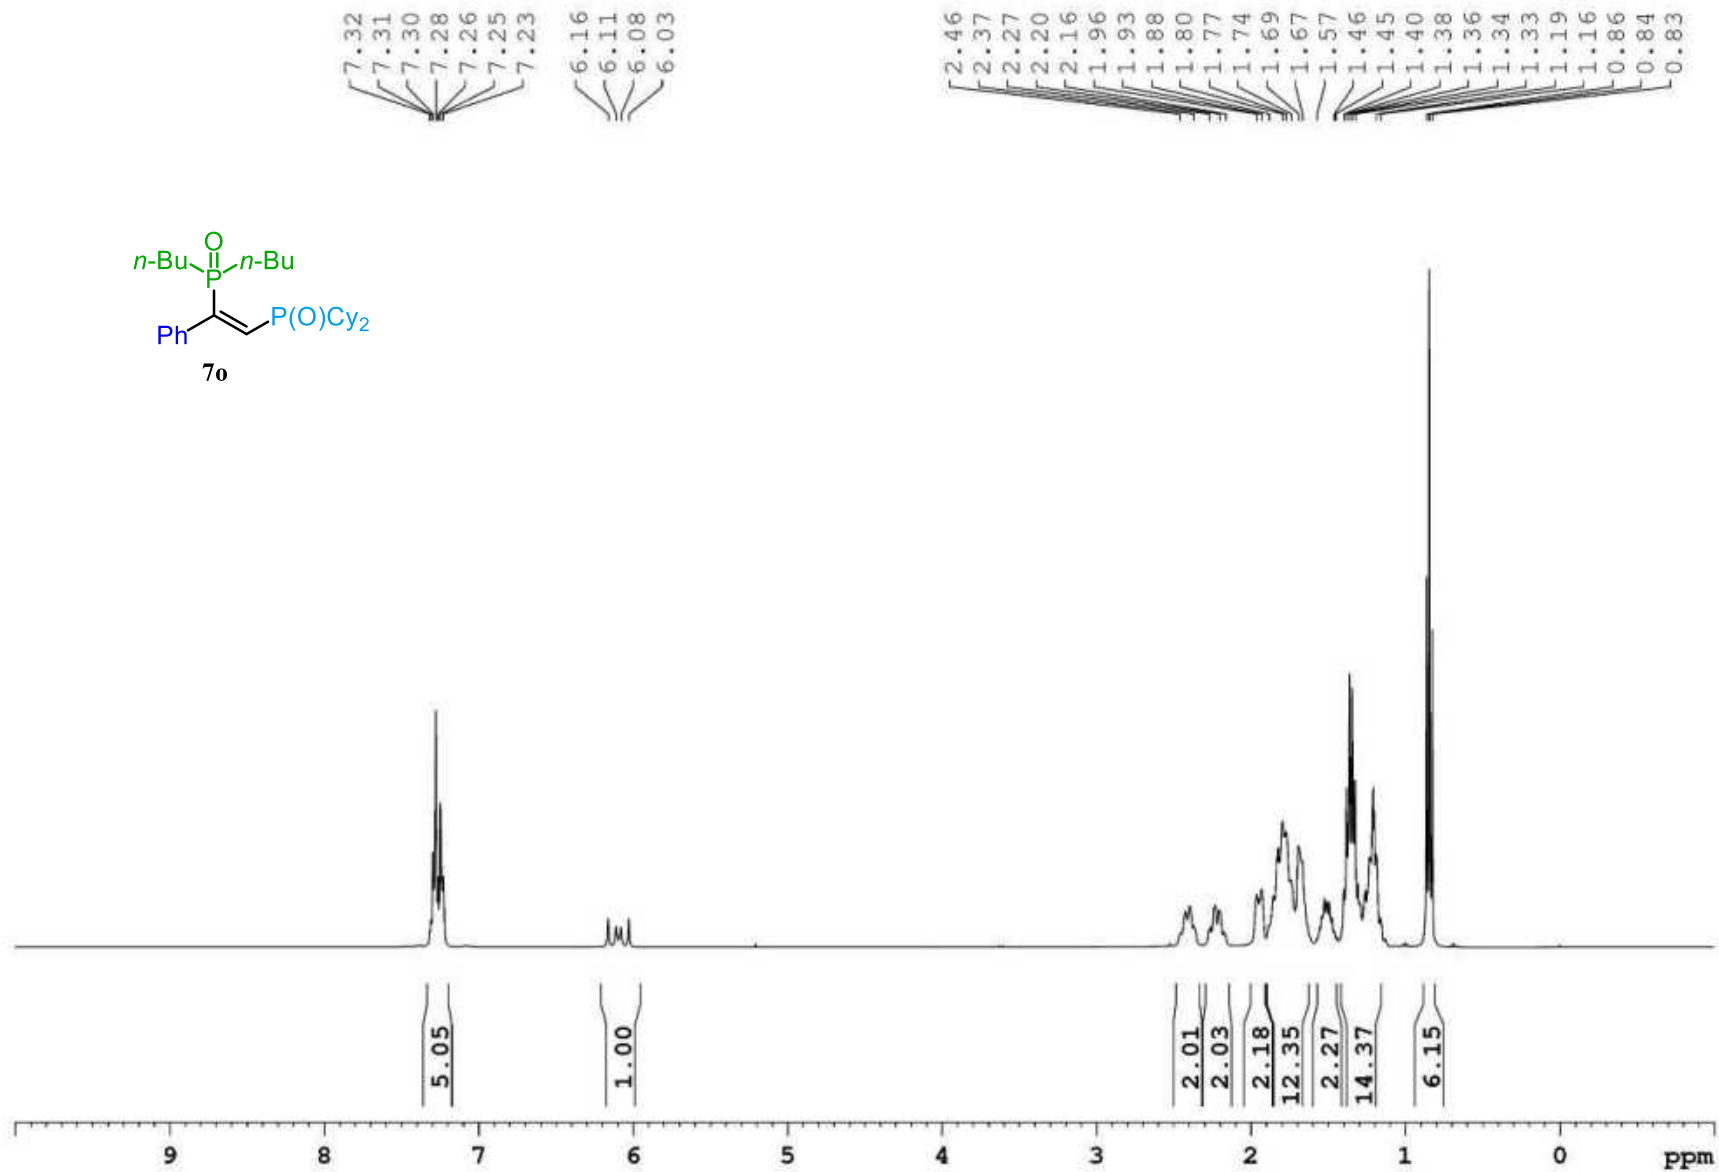

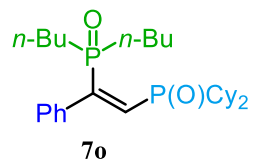

160.55  
159.86

141.90  
141.83  
141.75  
141.68  
134.58  
133.75  
128.35  
128.29  
128.01

36.69  
36.01  
31.35  
30.69  
26.51  
26.38  
26.32  
26.20  
25.81  
25.10  
25.08  
24.29  
24.13  
23.90  
23.85  
13.77

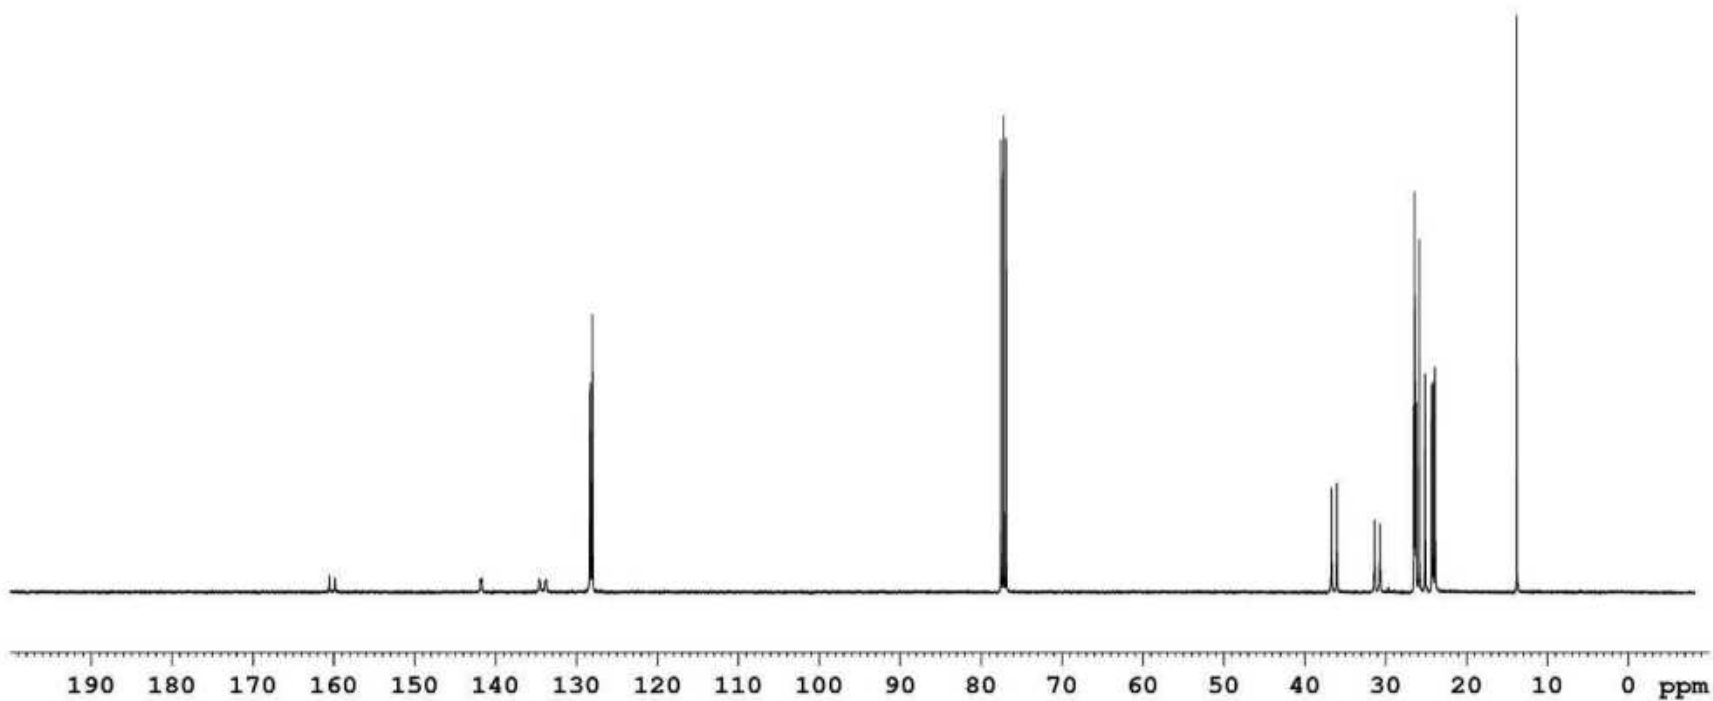



—43.38

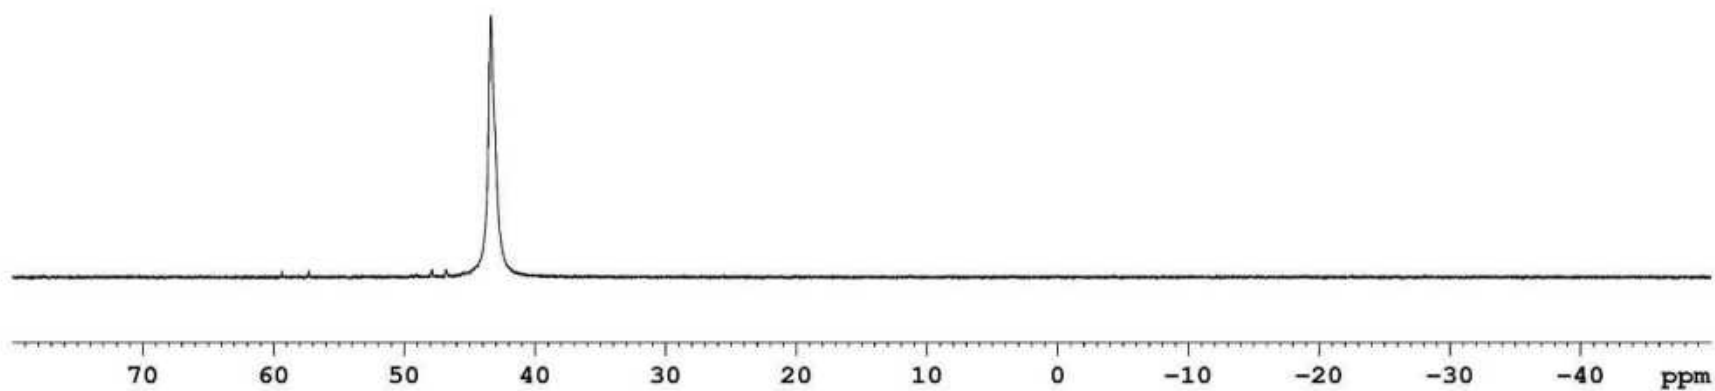



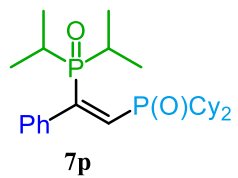

7.34  
7.32  
7.31  
7.30  
7.26

6.27  
6.22  
6.19  
6.14

3.05  
2.99  
2.98  
2.96  
1.99  
1.97  
1.83  
1.82  
1.71  
1.45  
1.42  
1.41  
1.40  
1.39  
1.38  
1.36  
1.31  
1.29  
1.28  
1.25  
1.24  
1.22  
1.20  
1.18  
1.16

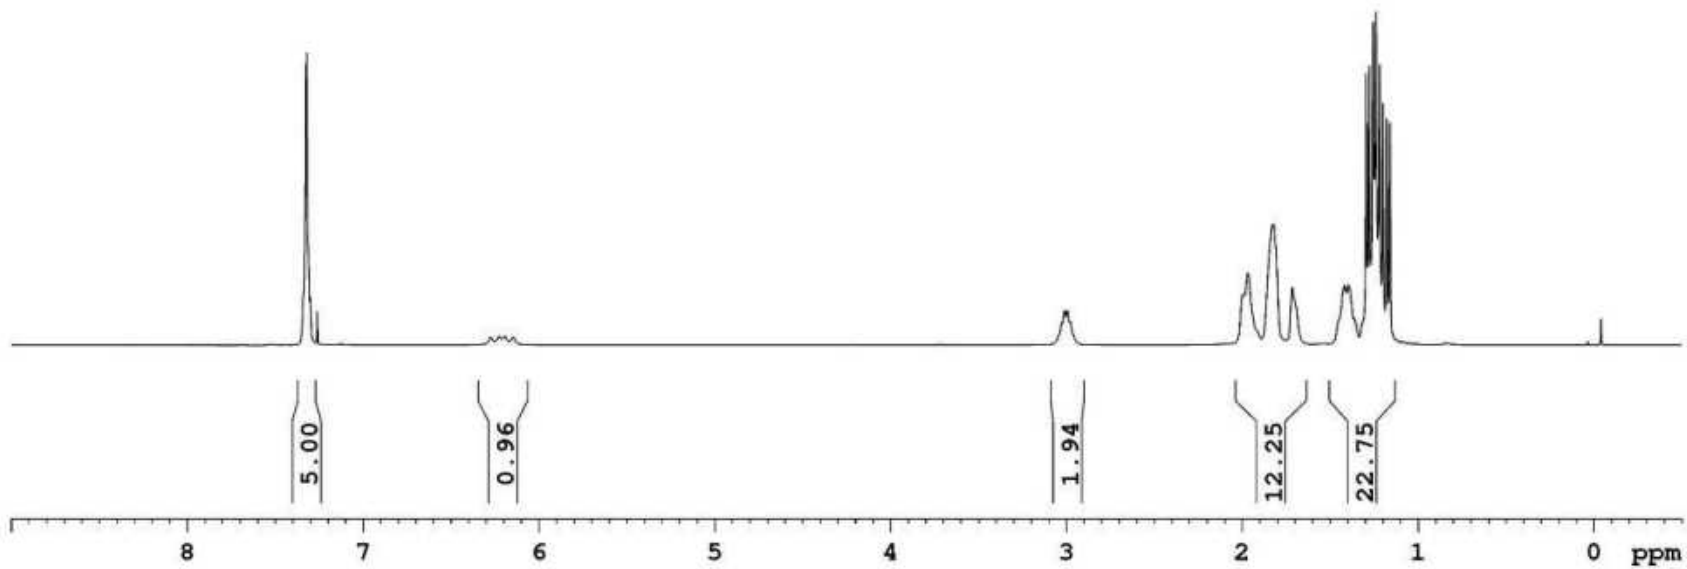

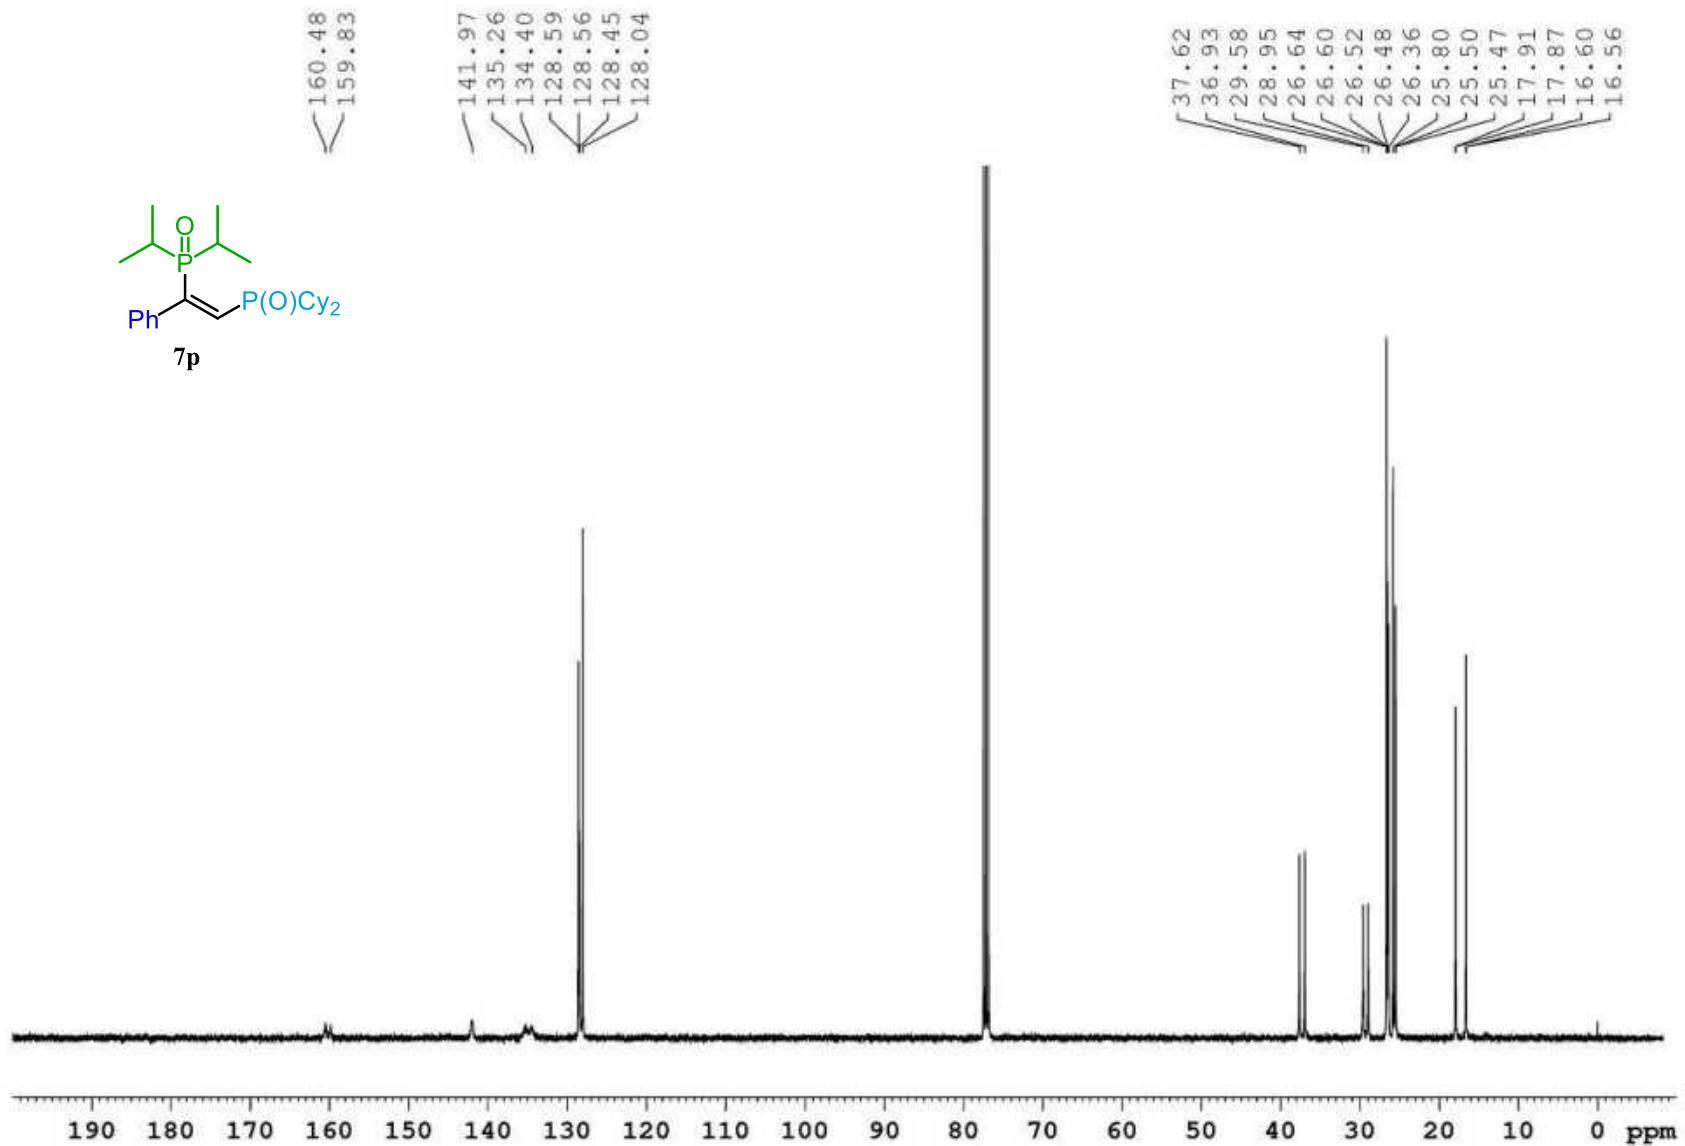

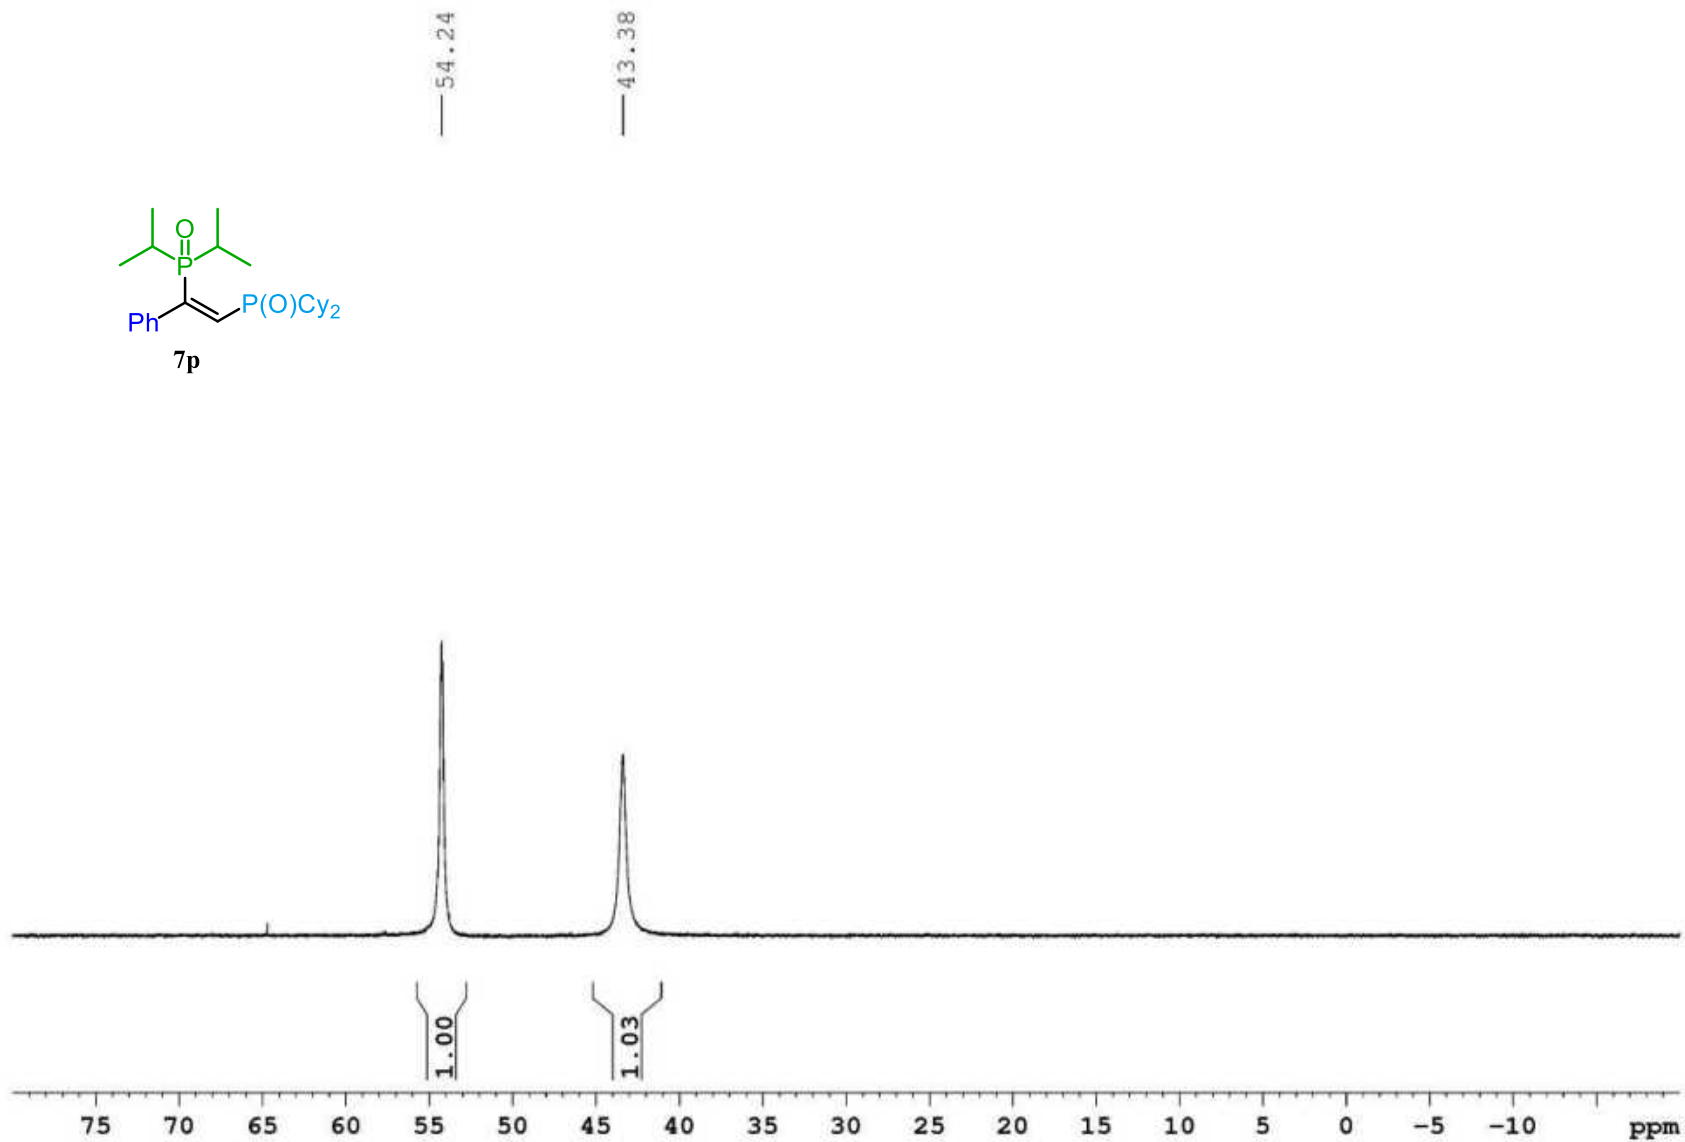

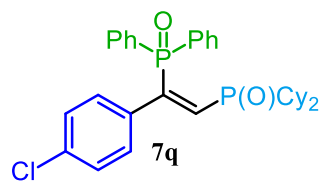

7.57  
7.55  
7.54  
7.52  
7.50  
7.49  
7.40  
7.38  
7.38  
7.37  
7.26  
7.07  
7.05  
6.73  
6.71  
6.62

2.55  
2.50  
2.50  
2.45  
1.95  
1.92  
1.77  
1.73  
1.62  
1.49  
1.26  
1.22  
1.19  
1.16

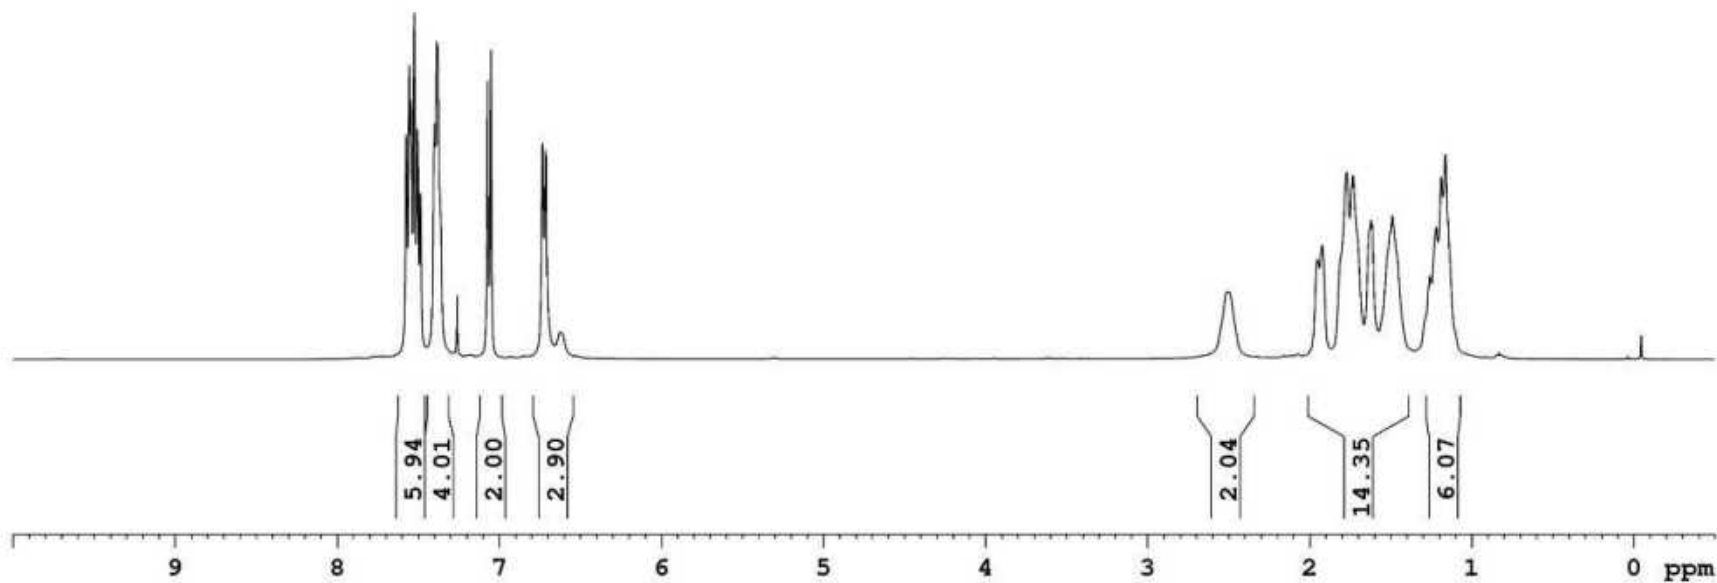

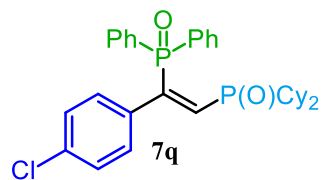

152.76  
151.82  
147.15  
146.35  
138.62  
138.49  
138.40  
134.61  
132.47  
132.11  
132.01  
131.50  
130.46  
130.04  
130.01  
128.60  
128.47  
128.34

38.81  
38.14  
26.74  
26.71  
26.49  
26.36  
26.22  
26.17  
25.78

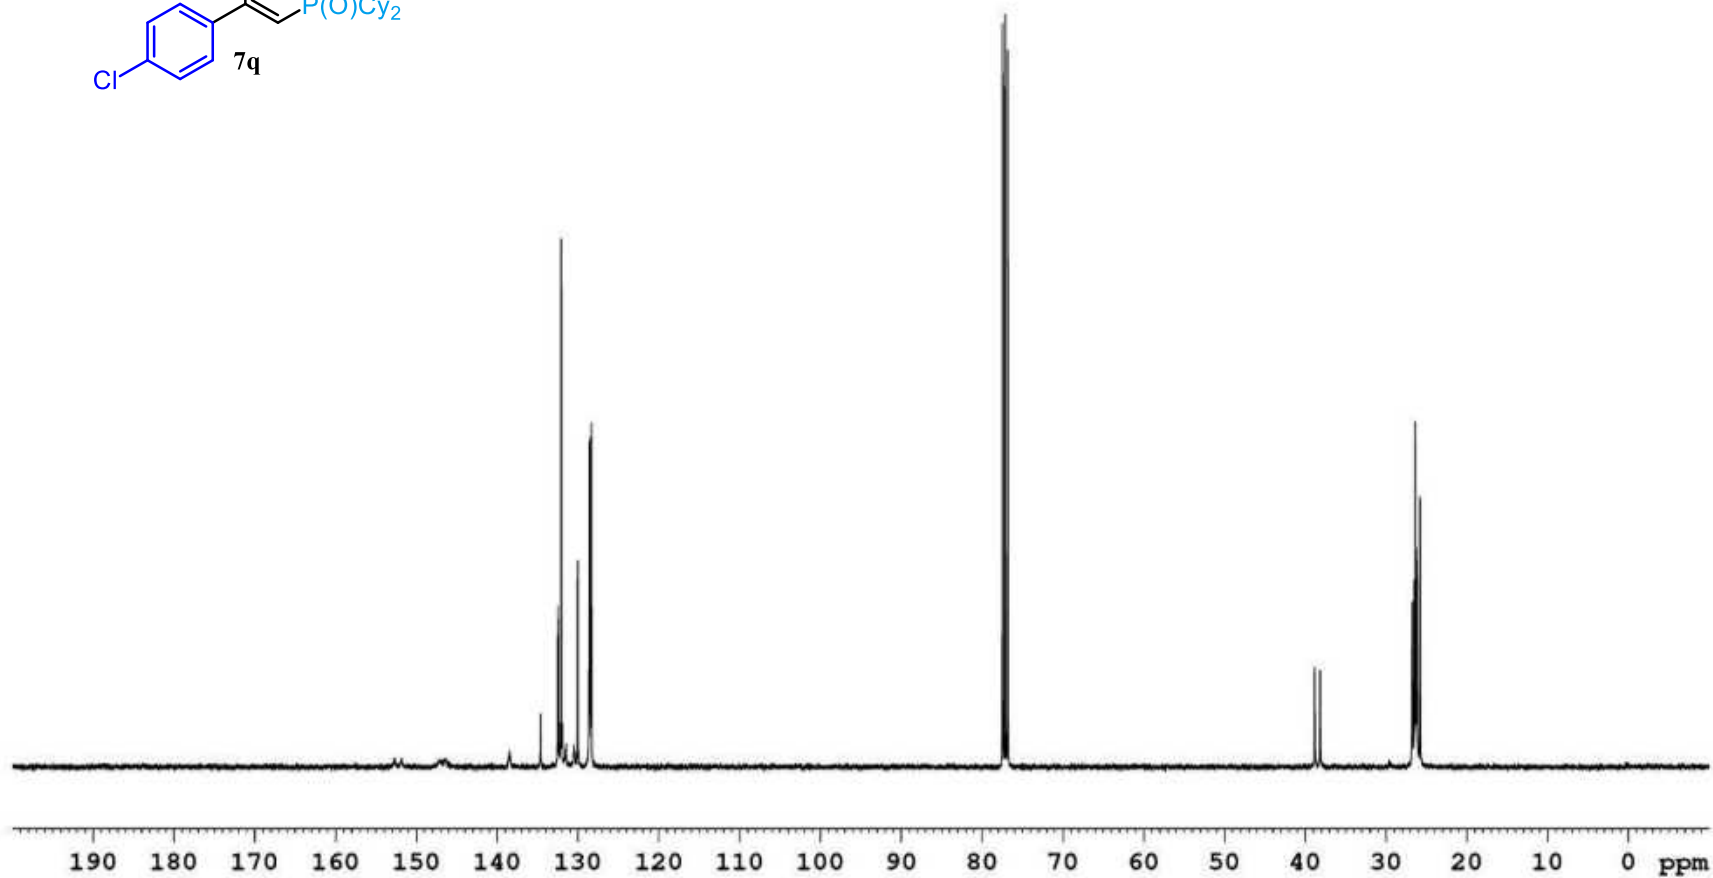

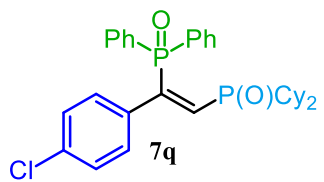

—48.73

—24.60

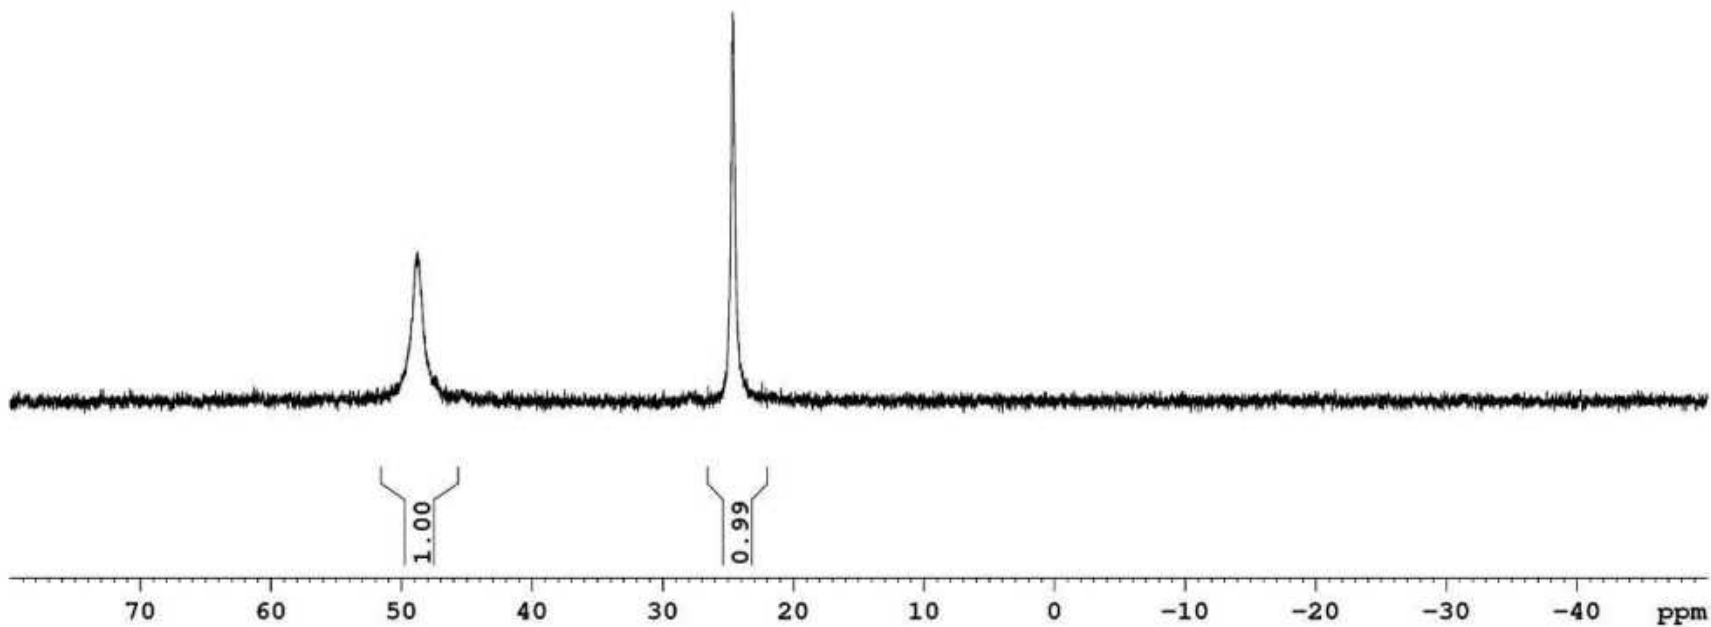

7.56  
7.54  
7.53  
7.51  
7.49  
7.47  
7.46  
7.38  
7.37  
7.36  
7.36  
7.34  
7.26  
6.69  
6.67  
6.60  
6.58

3.68  
2.64  
2.62  
2.60  
2.57  
1.98  
1.95  
1.80  
1.76  
1.73  
1.70  
1.68  
1.62  
1.60  
1.55  
1.54  
1.51  
1.50  
1.48  
1.28  
1.26  
1.23  
1.21  
1.19  
1.16  
1.14  
1.12  
1.09

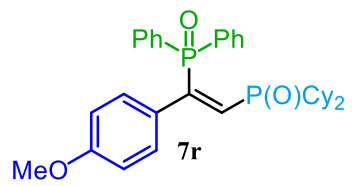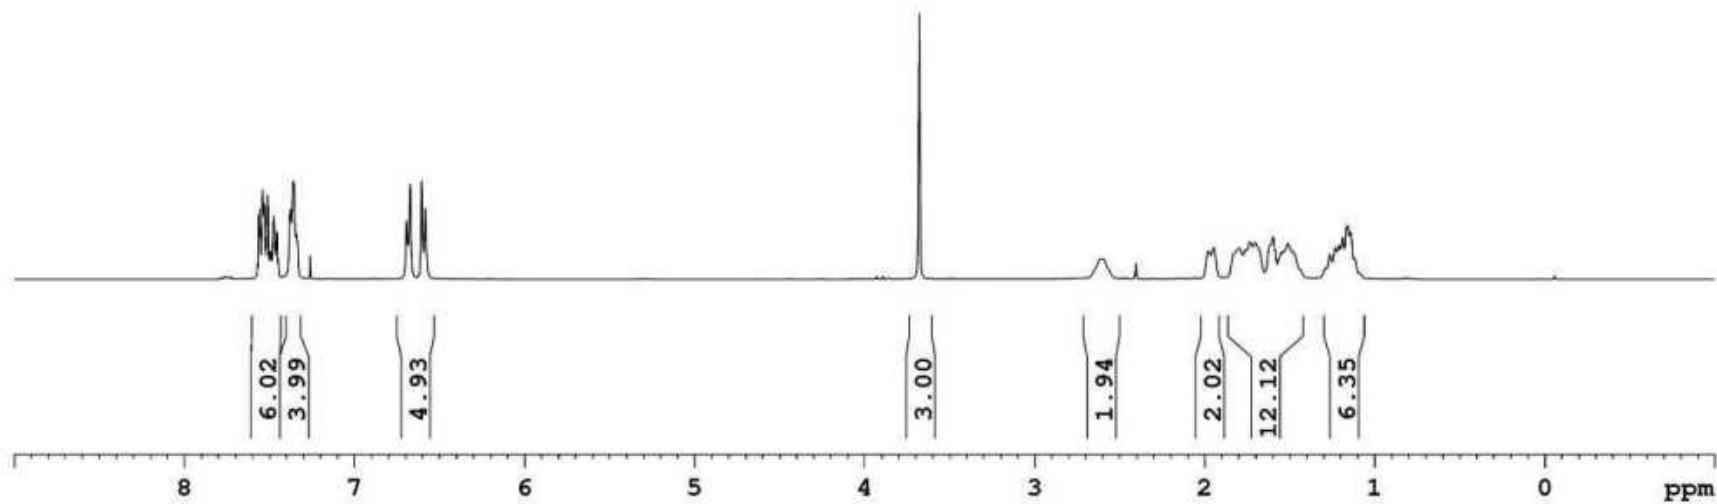



159.70  
 152.40  
 151.54  
 147.06  
 146.28  
 132.20  
 132.18  
 132.12  
 132.02  
 131.00  
 130.14  
 130.10  
 128.45  
 128.33  
 113.49

55.21  
 39.01  
 38.34  
 26.84  
 26.81  
 26.53  
 26.40  
 26.33  
 26.29  
 26.27  
 25.85

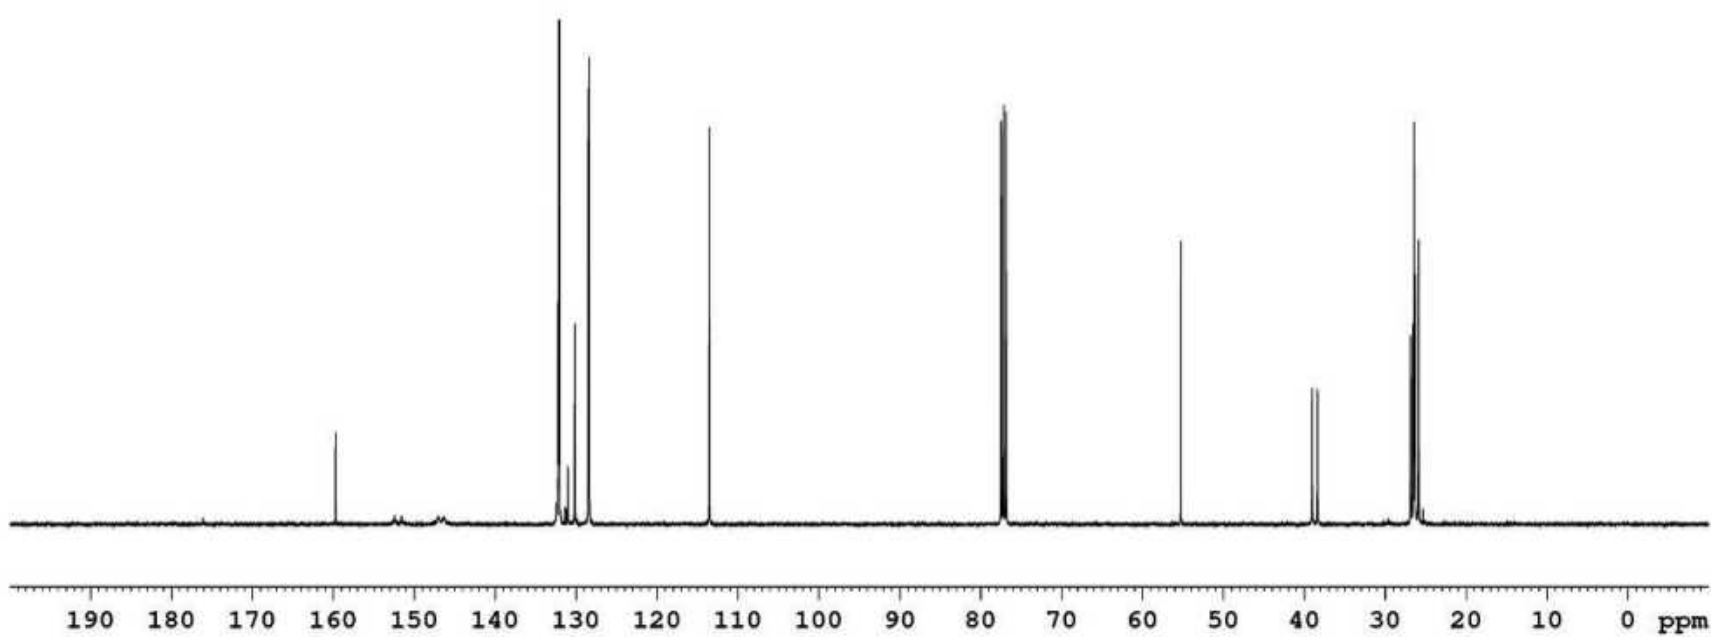



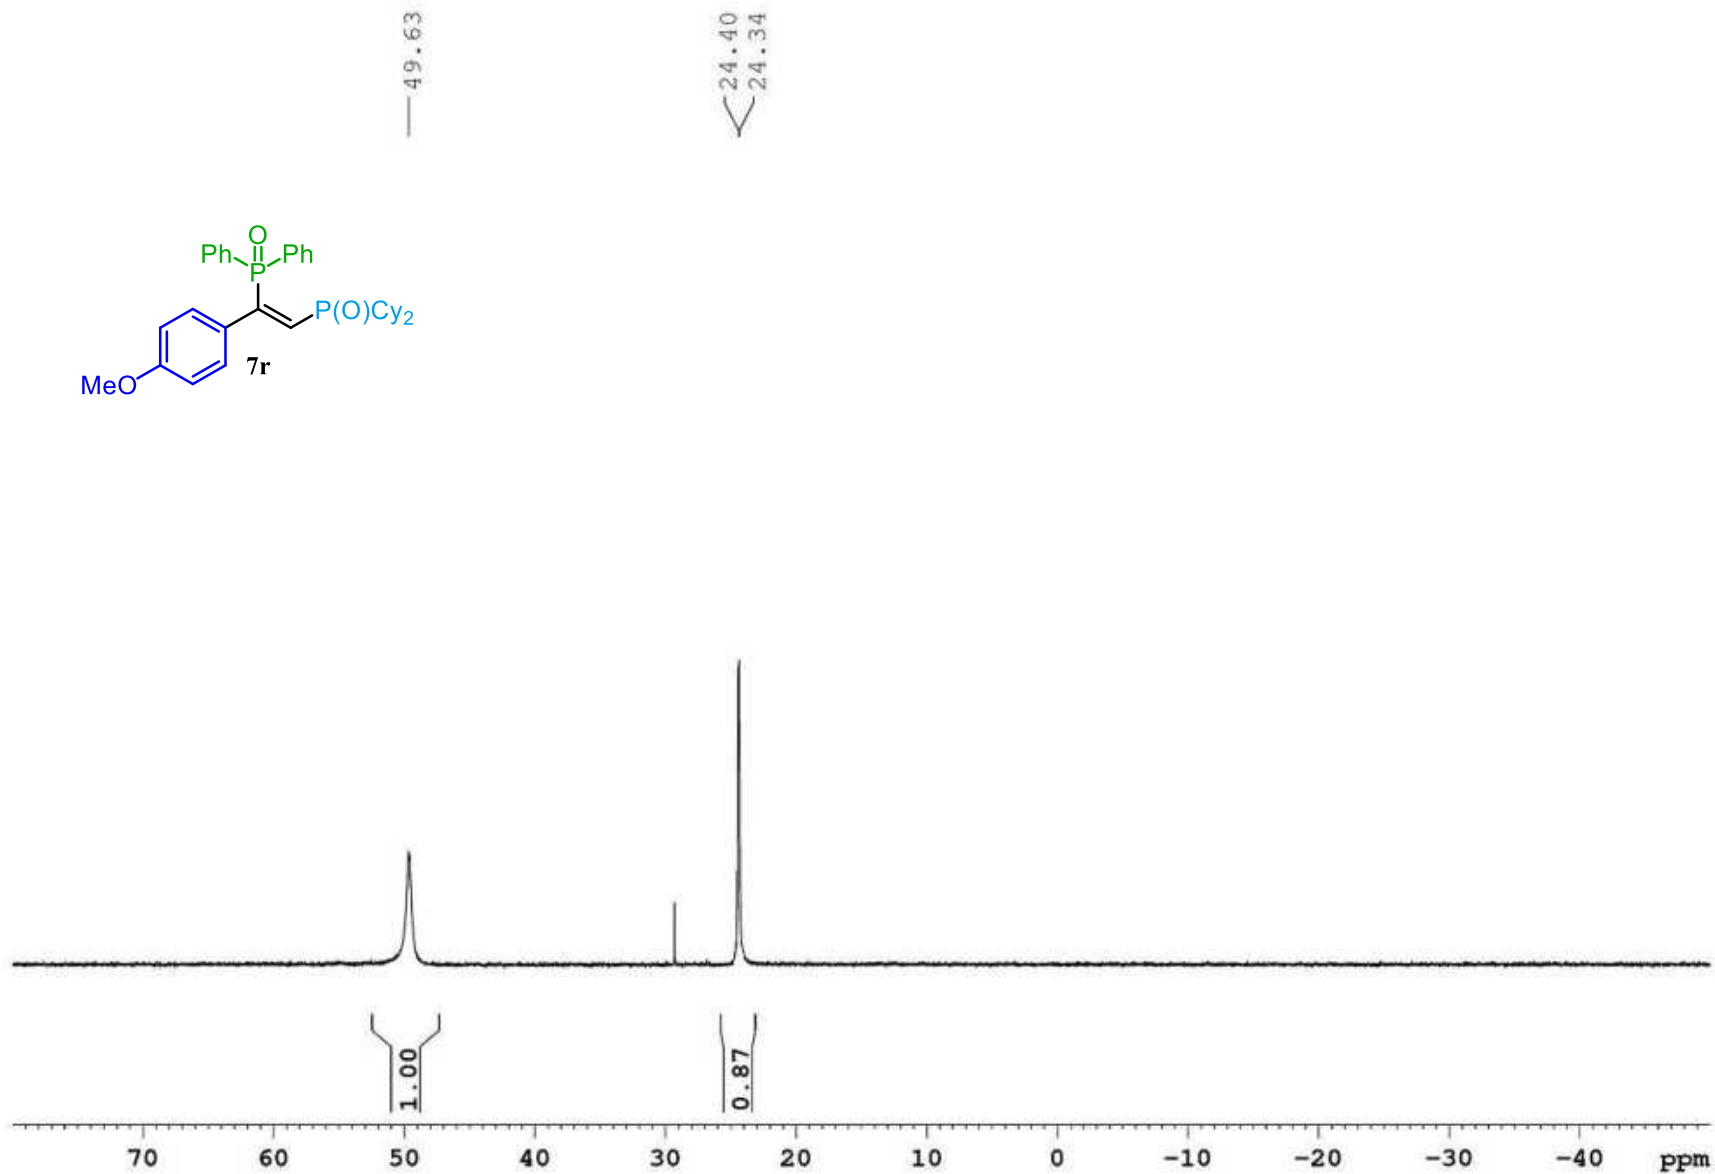

8.47  
8.32  
7.87  
7.85  
7.84  
7.83  
7.72  
7.70  
7.69  
7.66  
7.65  
7.49  
7.47  
7.45  
7.29  
7.25  
7.23  
7.23  
6.85  
6.80  
6.77  
6.72

3.89  
3.88  
3.86  
3.84  
3.82  
3.81

1.23  
1.21  
1.18  
1.16  
1.16  
1.14  
1.11  
1.09

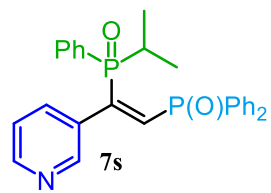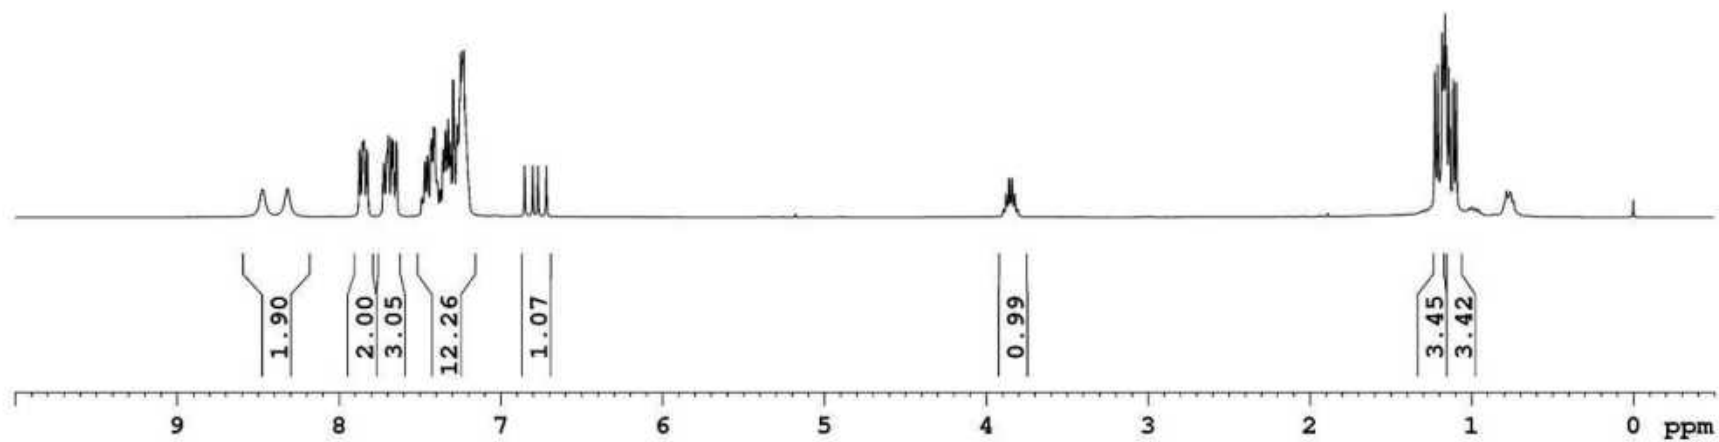

154.88  
154.19  
149.00  
147.82  
138.66  
138.57  
137.74  
137.65  
137.55  
137.03  
133.28  
133.12  
132.24  
132.21  
132.11  
132.04  
132.01  
131.97  
131.94  
131.80  
131.78  
131.18  
131.03  
130.94  
130.69  
130.59  
129.00  
128.88  
128.74  
128.62  
128.34  
128.22  
122.63

26.66  
25.96  
15.61  
15.58  
15.36  
15.33

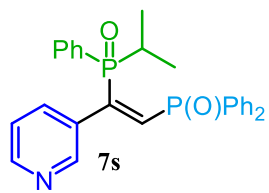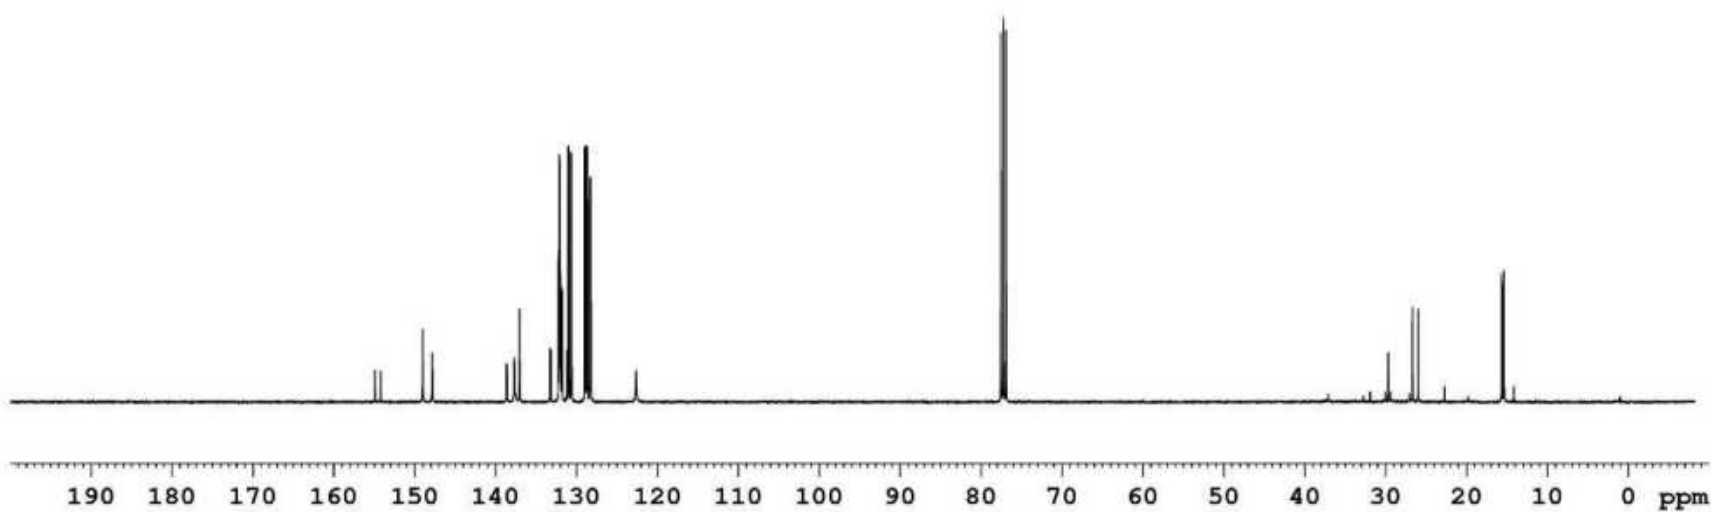

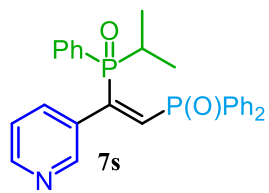

38.83  
38.75

18.36  
18.28

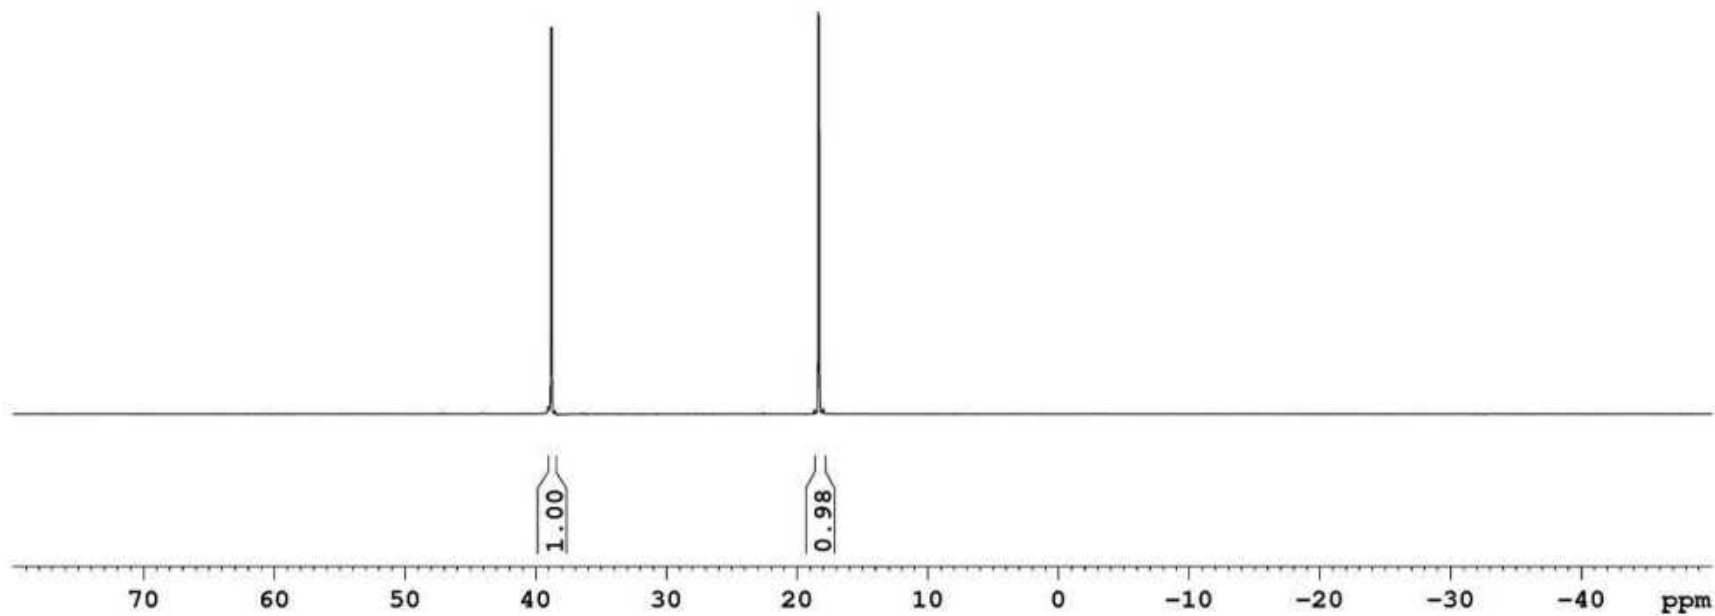

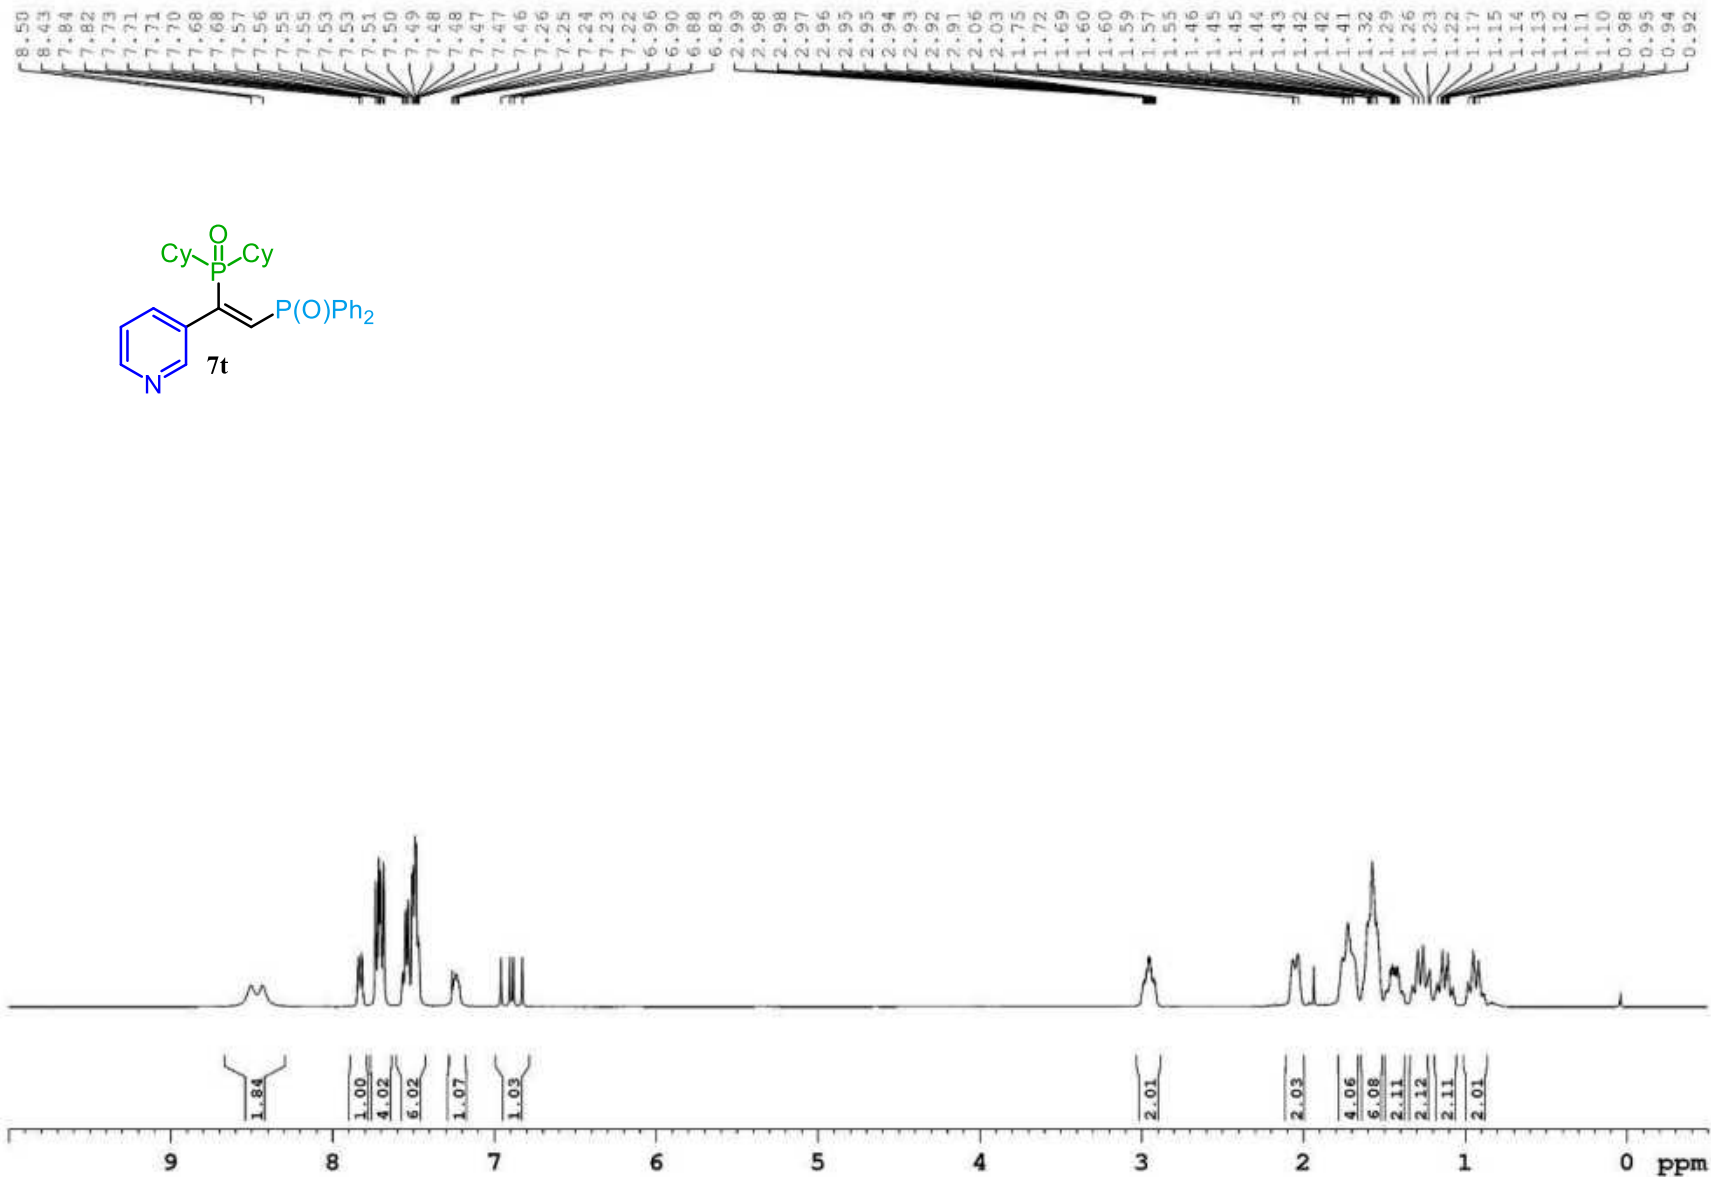

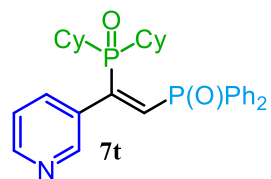

155.20  
 155.17  
 154.60  
 154.57  
 149.24  
 148.20  
 137.91  
 137.14  
 135.90  
 135.82  
 134.97  
 134.88  
 133.14  
 132.43  
 132.41  
 132.08  
 130.87  
 130.78  
 129.16  
 129.04  
 122.27

39.55  
 38.91  
 26.53  
 26.49  
 26.32  
 26.28  
 26.23  
 26.20  
 26.09  
 26.07  
 25.62

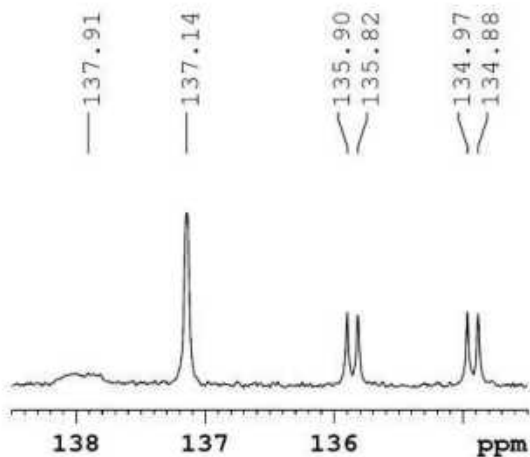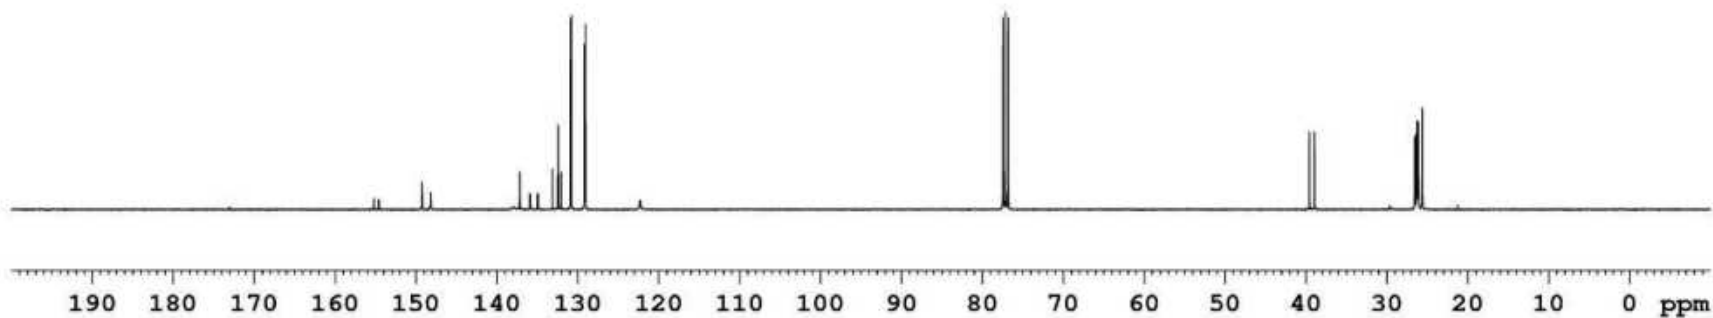

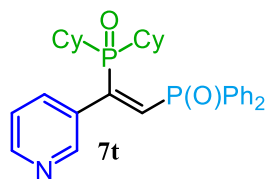

51.42  
51.35

18.29  
18.22

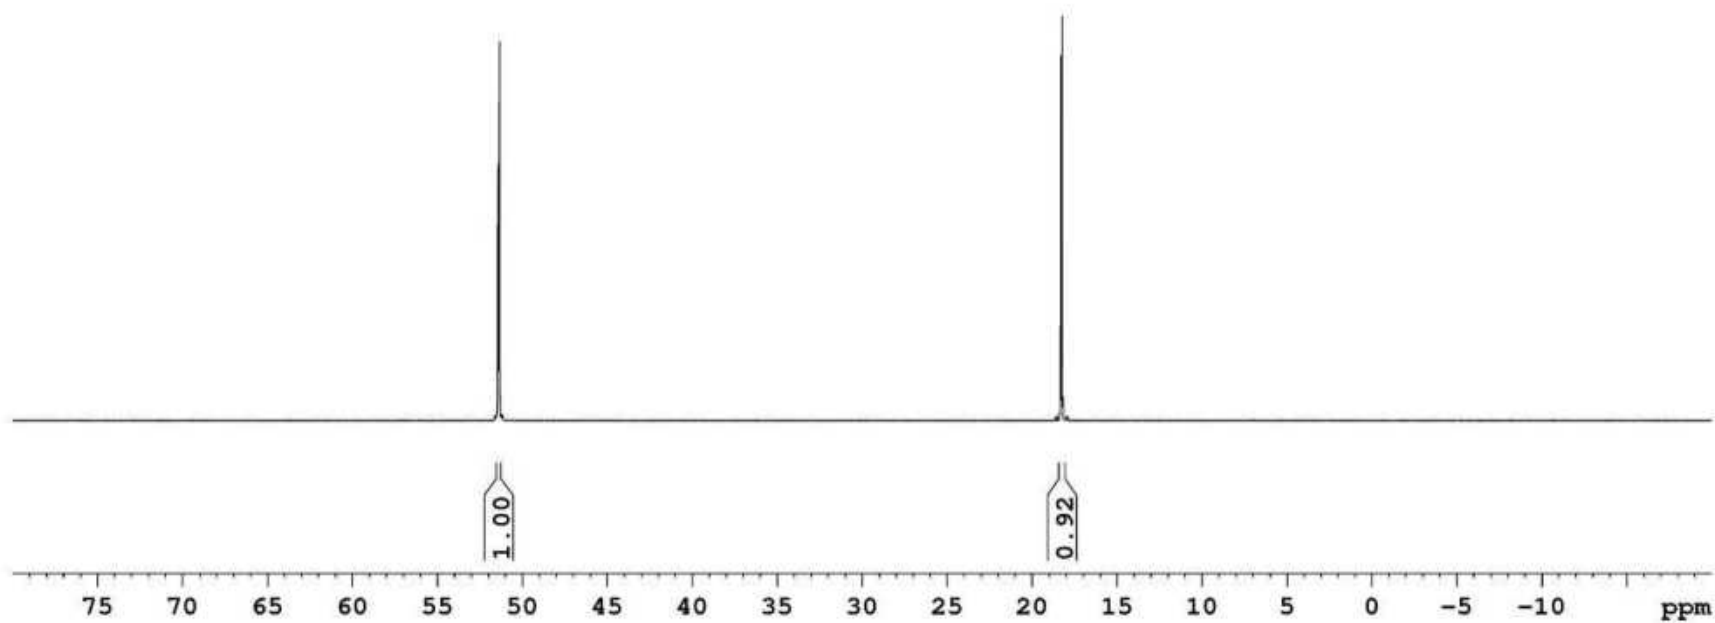

8.53  
8.52  
8.47  
8.47  
7.83  
7.81  
7.73  
7.71  
7.70  
7.70  
7.68  
7.67  
7.57  
7.55  
7.55  
7.53  
7.53  
7.51  
7.50  
7.49  
7.48  
7.48  
7.47  
7.47  
7.47  
7.46  
7.27  
7.26  
7.25  
7.24  
6.95  
6.89  
6.87  
6.81  
2.65  
2.62  
2.61  
2.29  
2.28  
2.25  
2.25  
1.66  
1.65  
1.64  
1.39  
1.38  
1.37  
1.30  
1.28  
1.27  
1.25  
1.23  
1.22  
1.20  
1.19  
1.18  
1.16  
0.78  
0.76  
0.74

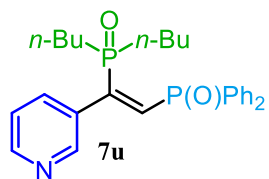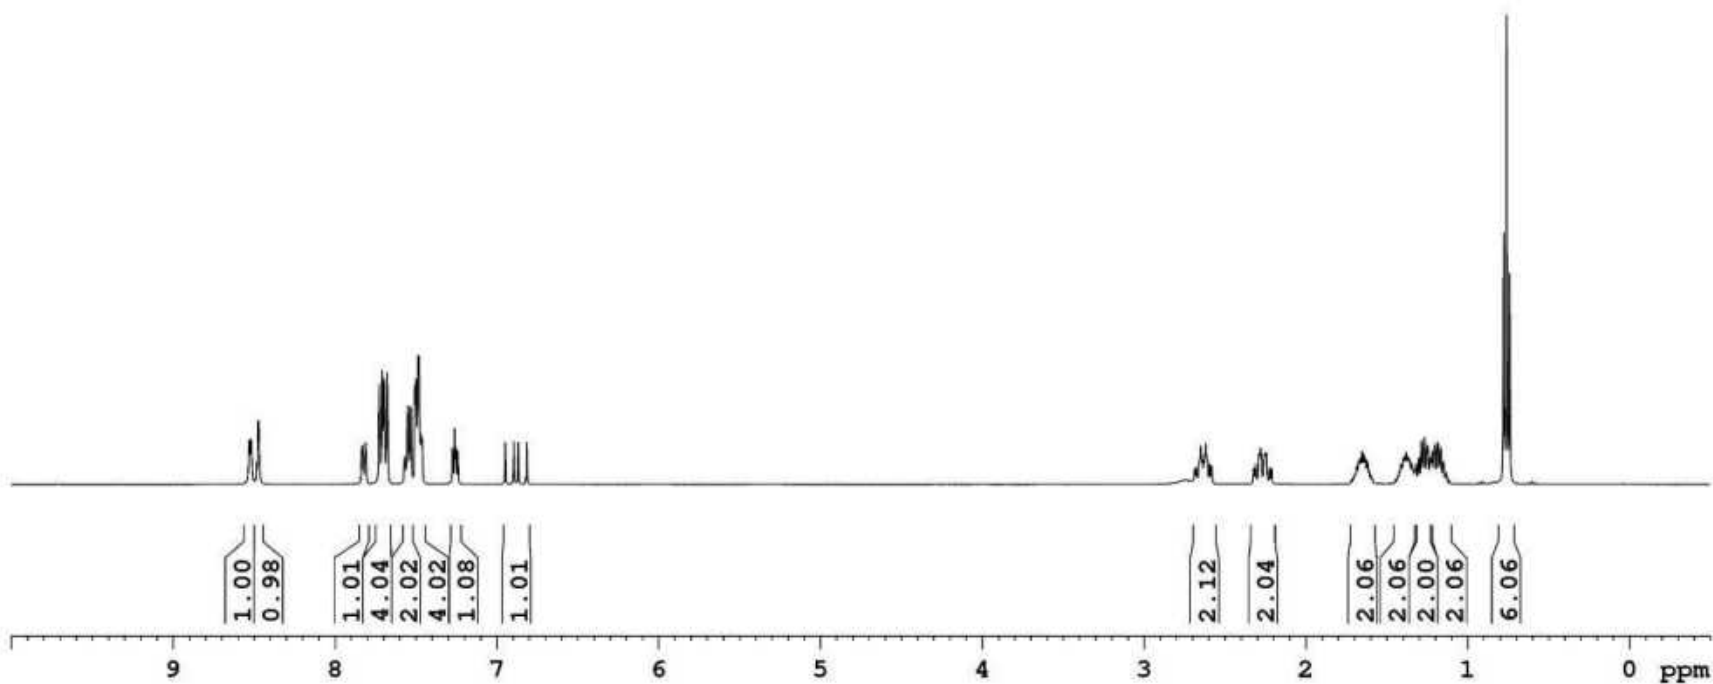



155.52  
155.50  
154.87  
154.84  
149.57  
148.16  
148.13  
137.63  
137.57  
137.46  
137.40  
136.74  
136.72  
136.63  
136.54  
135.71  
135.62  
133.06  
132.48  
132.45  
132.00  
130.92  
130.82  
129.14  
129.02  
122.39

31.36  
30.70  
24.11  
23.95  
23.85  
23.81  
13.59

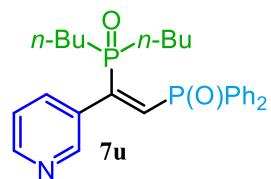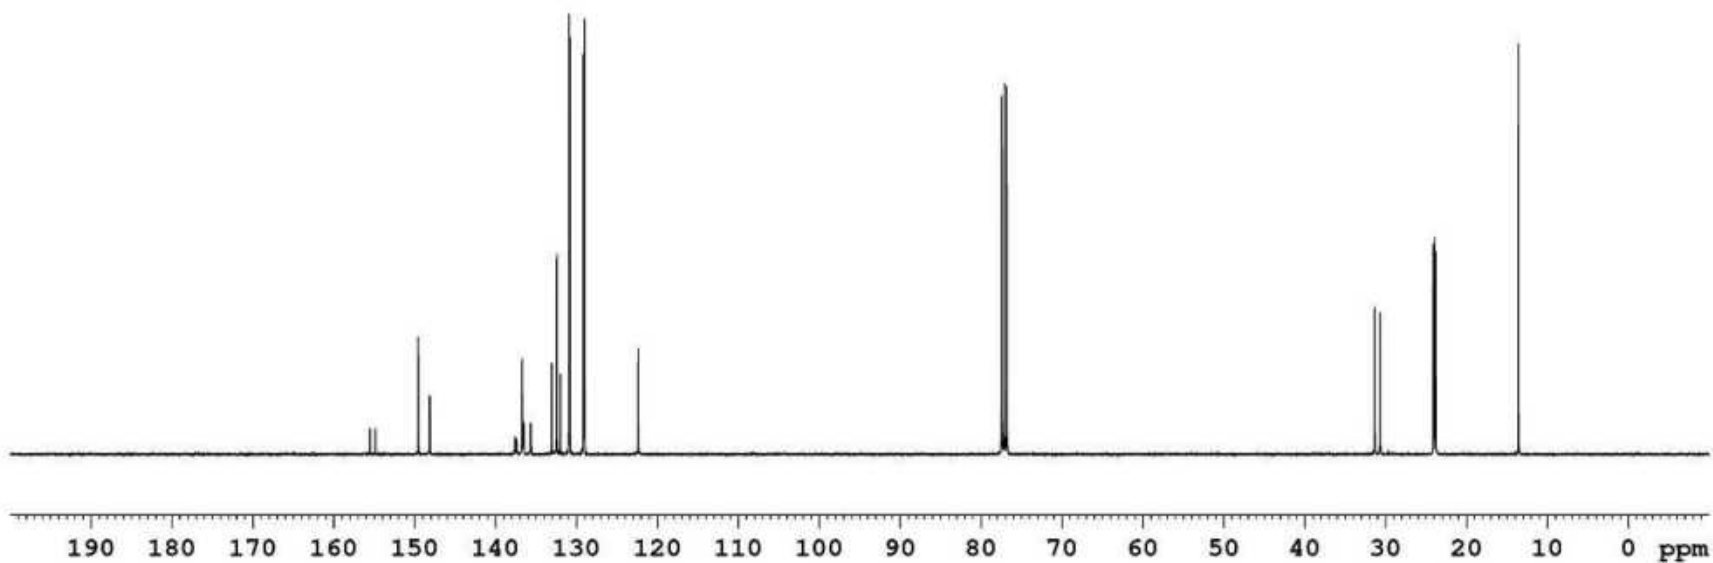

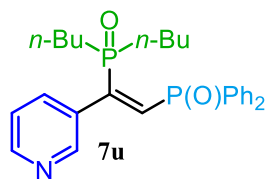

45.14  
45.07

18.41  
18.33

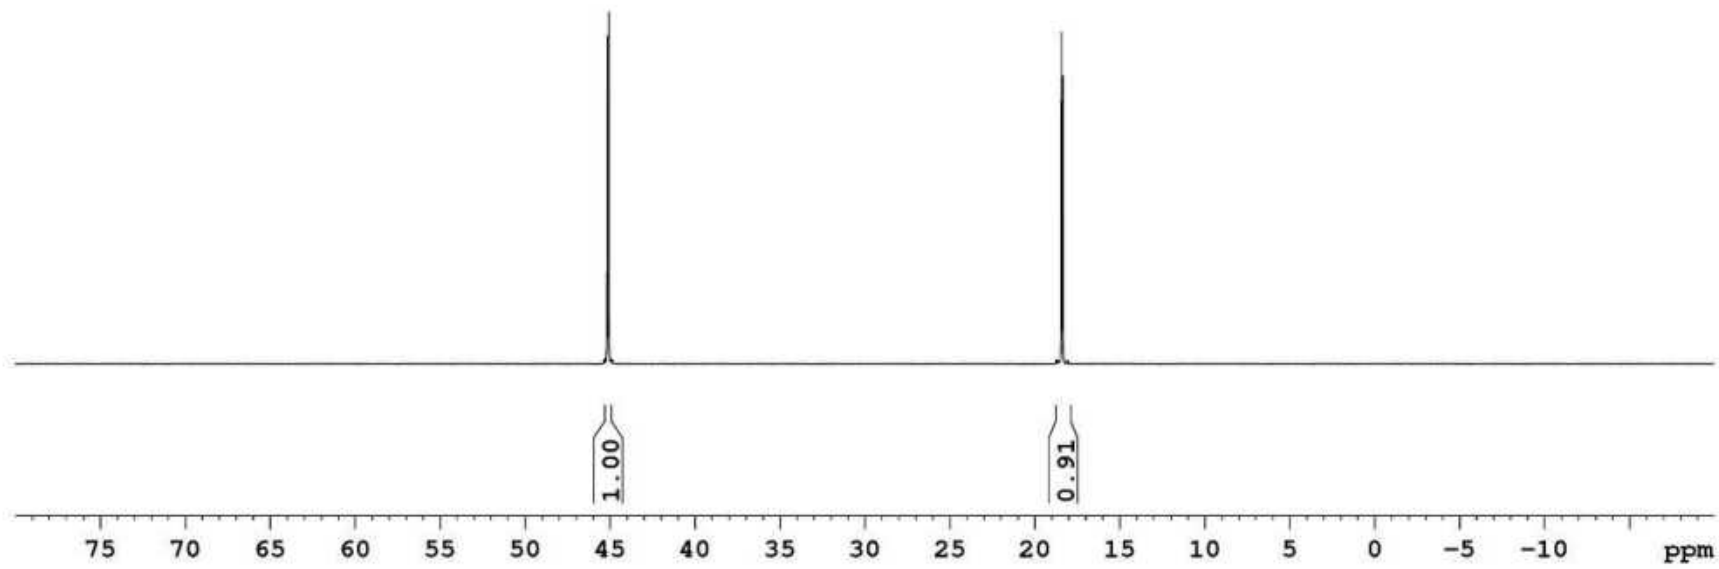

7.62  
7.60  
7.59  
7.57  
7.50  
7.48  
7.47  
7.45  
7.44  
7.43  
7.42  
7.41  
7.41  
7.26  
6.11  
6.06  
6.02  
5.97

2.76  
2.75  
2.69  
2.68  
2.42  
2.39  
2.38  
2.35  
2.03  
2.00  
1.73  
1.70  
1.62  
1.61  
1.53  
1.52  
1.44  
1.34  
1.27  
1.00  
0.99  
0.91  
0.82  
0.81  
0.60  
0.59  
0.58  
0.57  
0.56

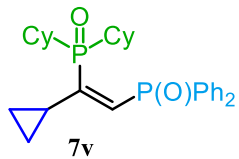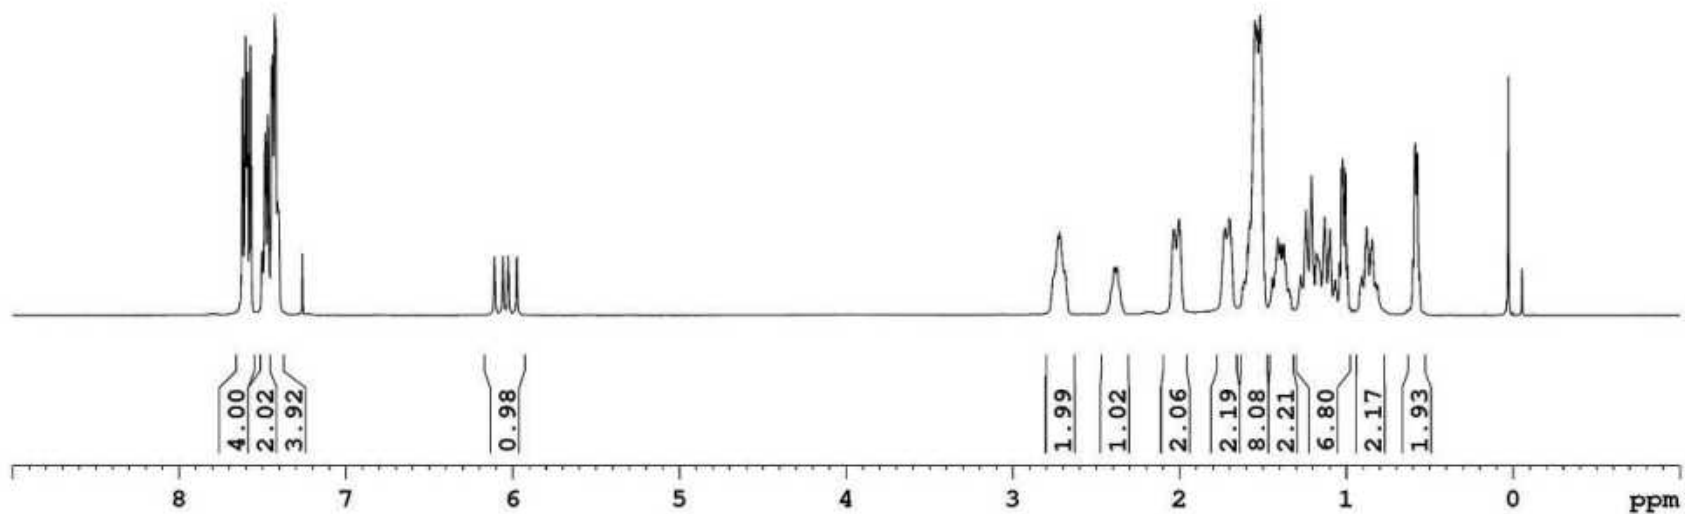

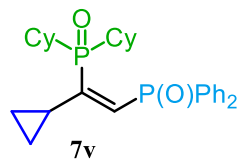

161.97  
161.33

133.28  
132.22  
130.90  
130.88  
129.76  
129.67  
127.85  
127.73  
121.03  
119.93

37.70  
37.06  
25.32  
25.27  
25.25  
25.14  
25.11  
24.70  
15.97  
15.87  
15.79  
15.68  
11.43

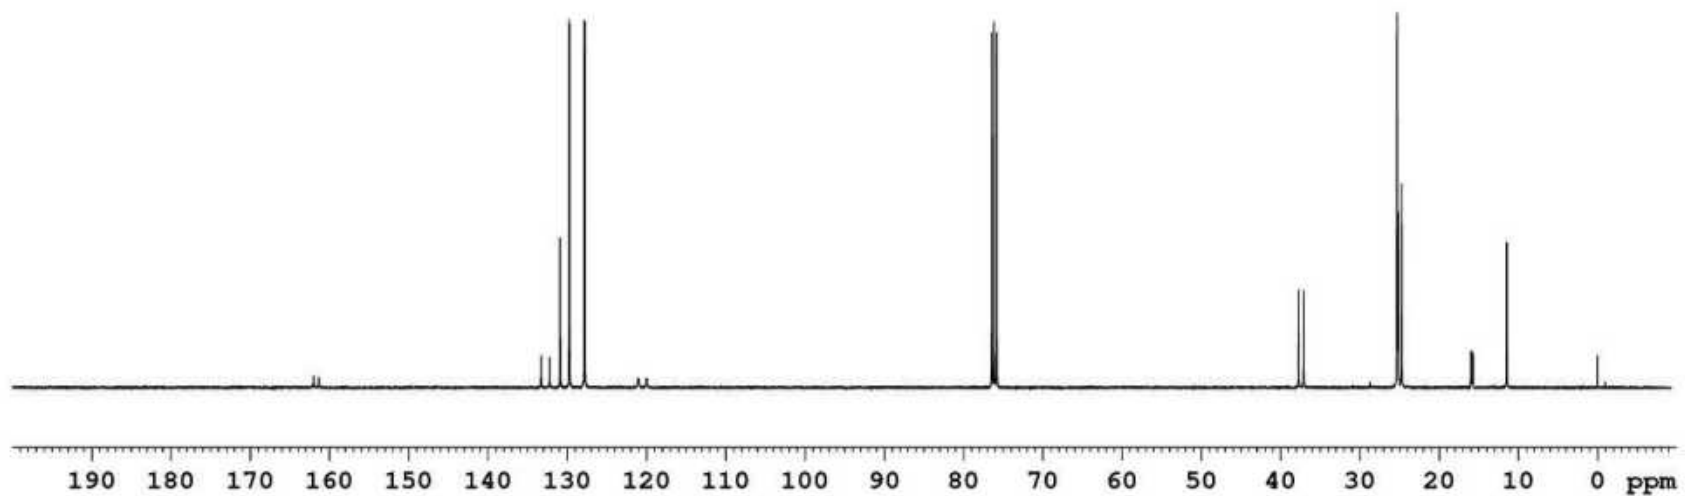

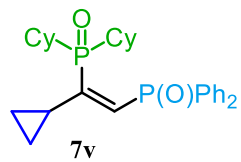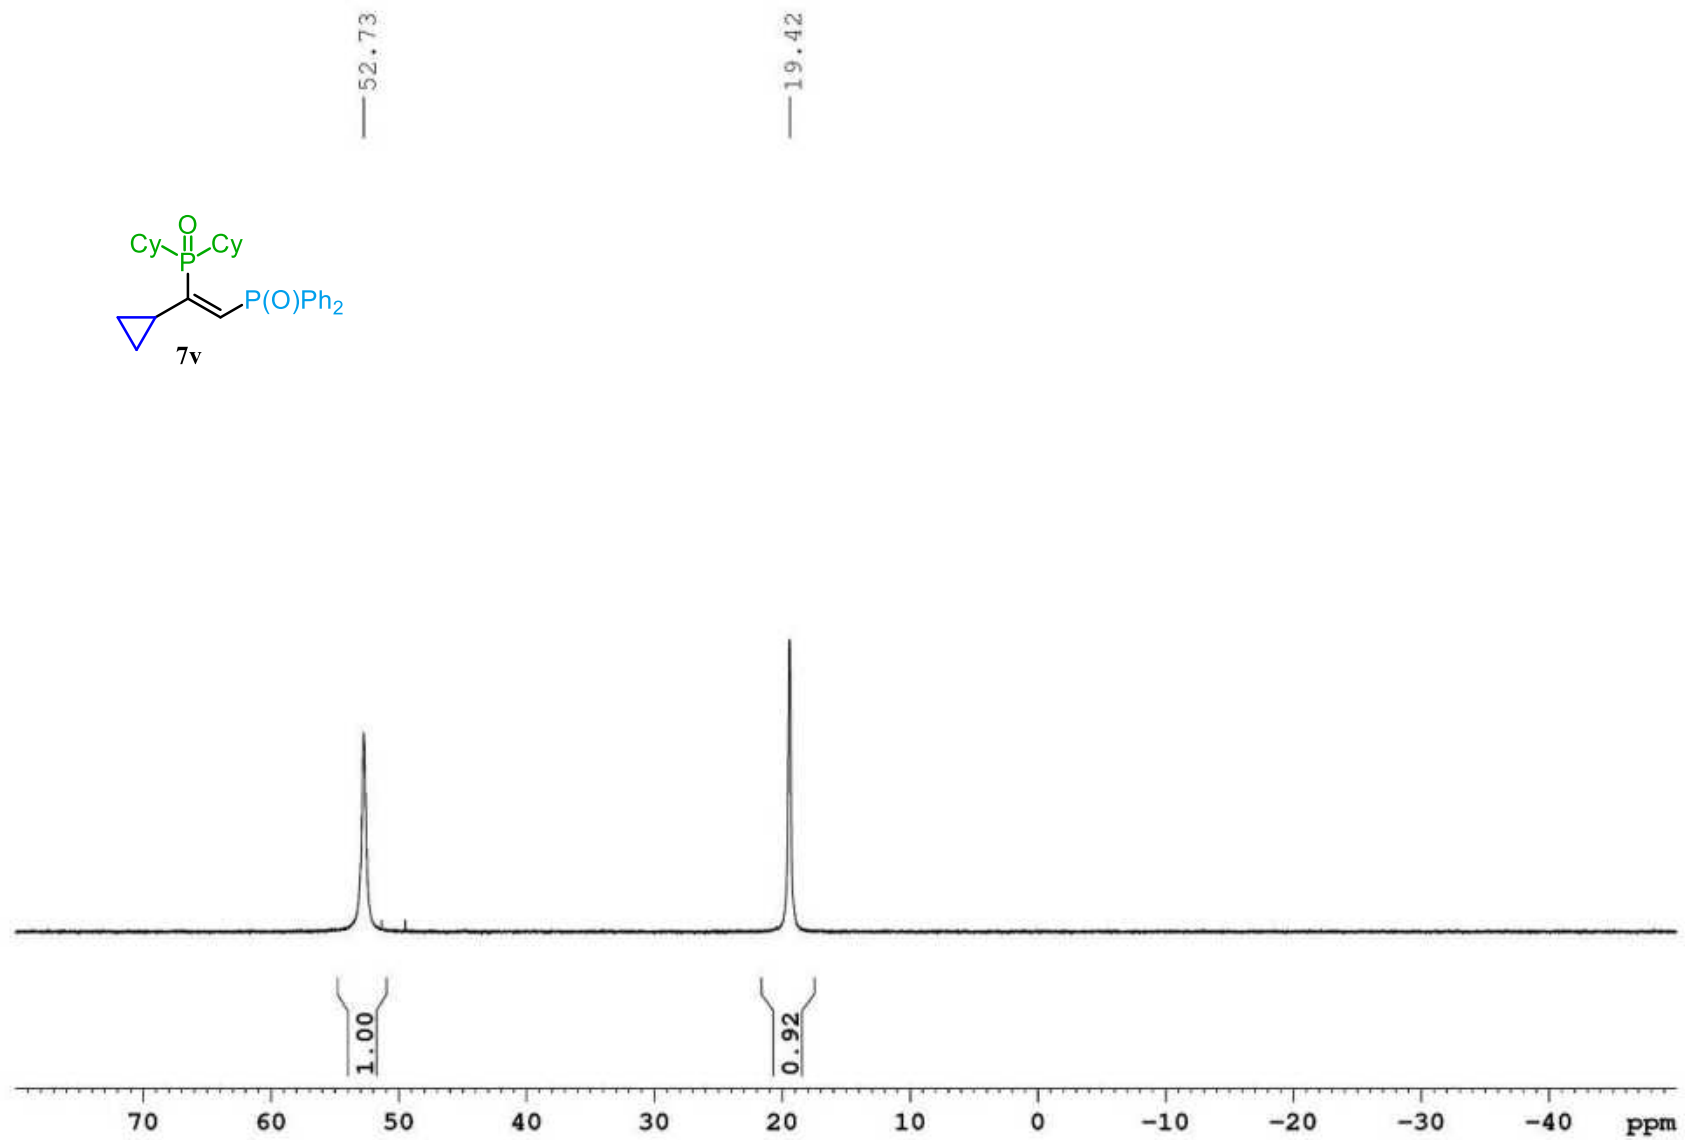

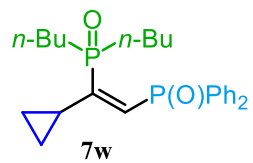

7.62  
 7.60  
 7.59  
 7.57  
 7.51  
 7.49  
 7.48  
 7.44  
 7.43  
 7.41  
 7.26  
 6.17  
 6.12  
 6.08  
 6.03

2.46  
 2.42  
 2.39  
 2.37  
 2.20  
 2.17  
 2.13  
 2.11  
 2.10  
 1.63  
 1.55  
 1.37  
 1.35  
 1.29  
 1.23  
 1.18  
 1.16  
 1.14  
 1.07  
 1.06  
 1.04  
 0.76  
 0.74  
 0.72  
 0.60  
 0.59

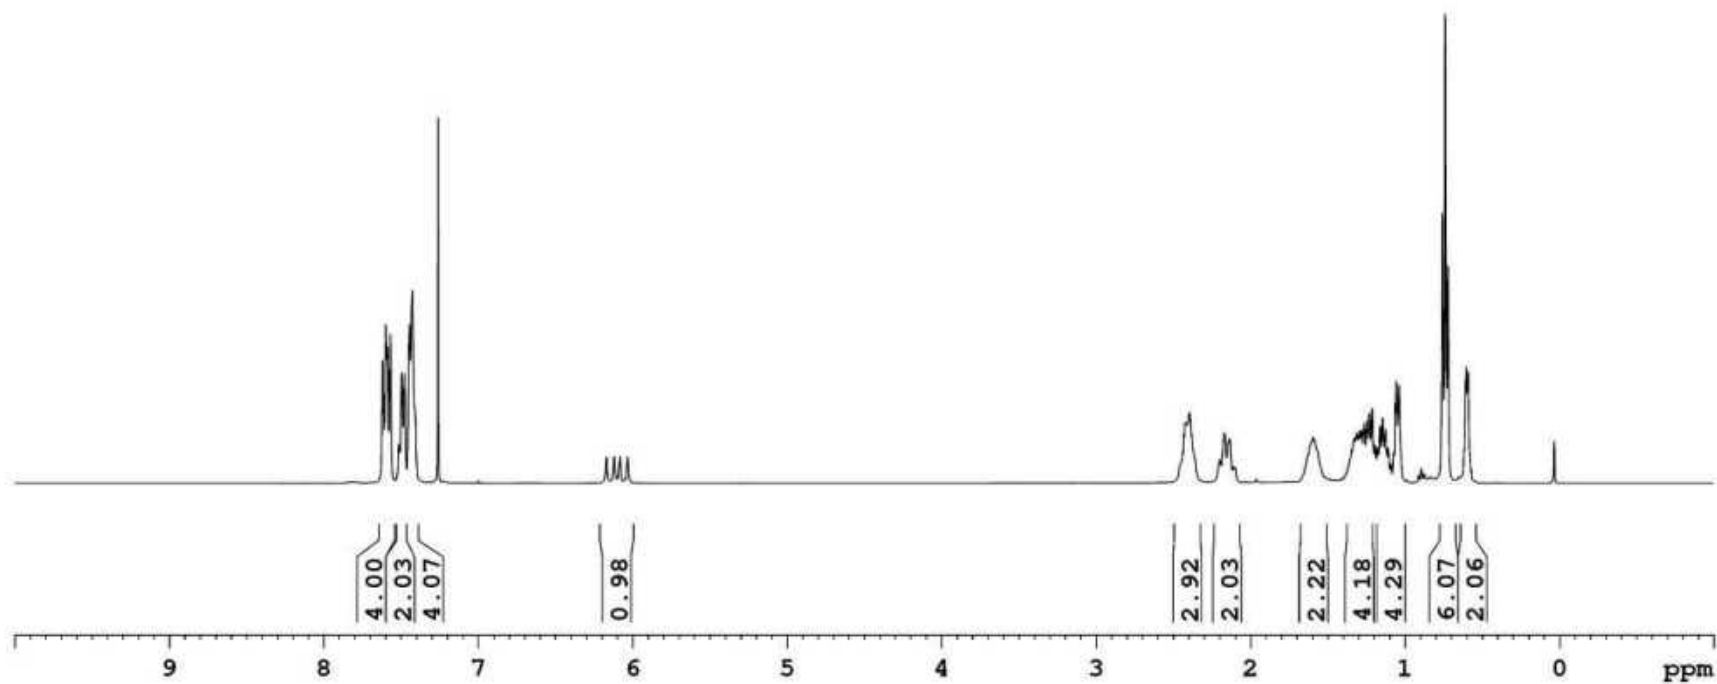

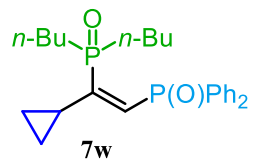

162.06  
161.37

133.19  
132.12  
130.98  
130.95  
129.80  
129.71  
127.85  
127.73  
122.16  
121.17

29.70  
29.04  
23.11  
22.95  
22.76  
22.71  
16.38  
16.27  
16.20  
16.09  
12.60  
10.80

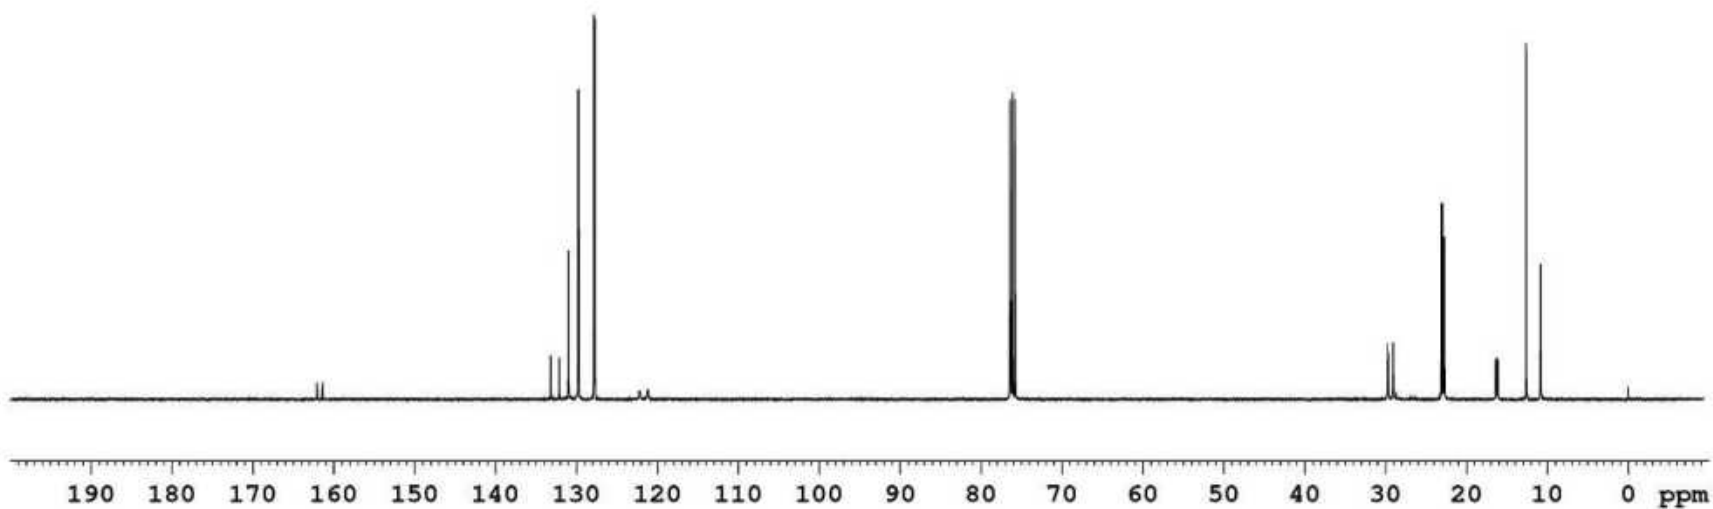



46.44  
46.35

19.57  
19.47

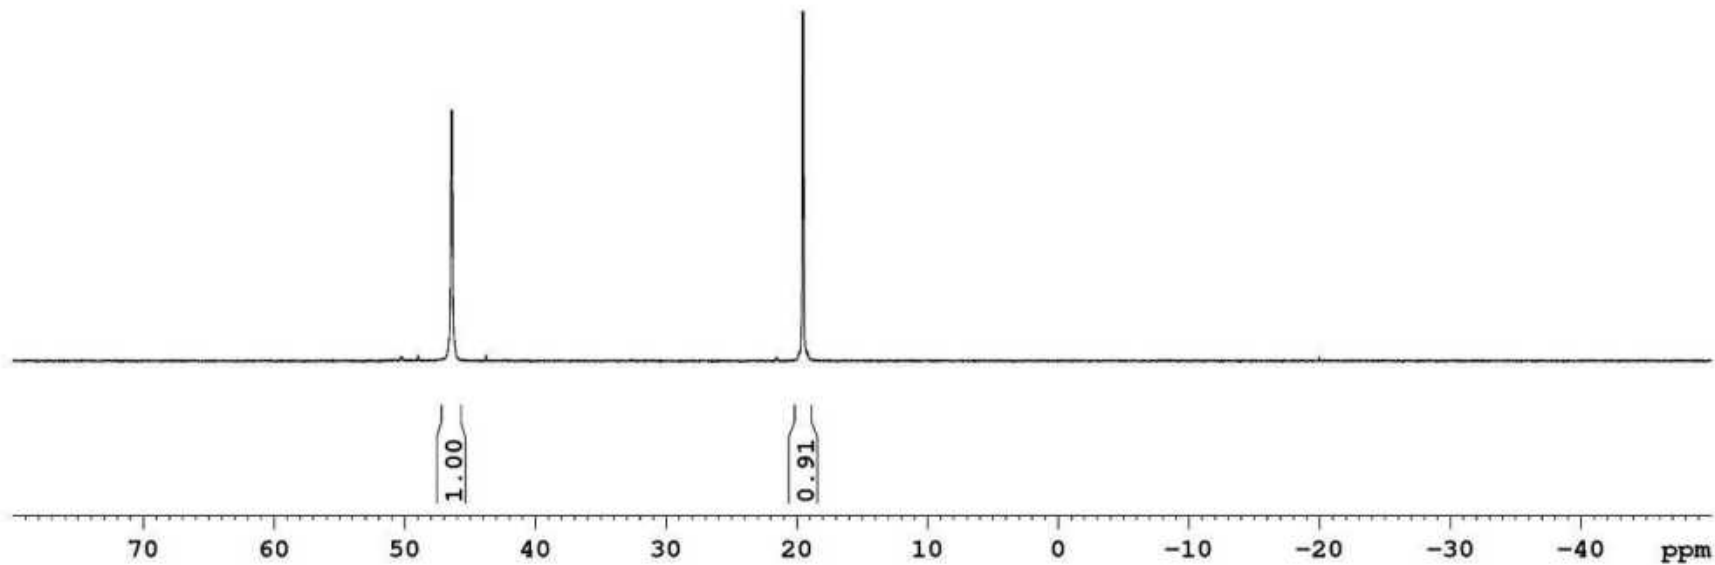



7.66  
7.64  
7.61  
7.61  
7.51  
7.49  
7.47  
7.47  
7.43  
7.41  
7.40  
7.38  
7.26  
6.11  
6.01

2.59  
2.54  
2.51  
1.90  
1.87  
1.67  
1.57  
1.48  
1.36  
1.33  
1.30  
1.29  
1.20  
1.16  
1.13  
1.09  
1.05  
1.02  
0.95  
0.92  
0.89  
0.86  
0.69  
0.67  
0.65  
0.58  
0.57

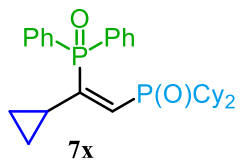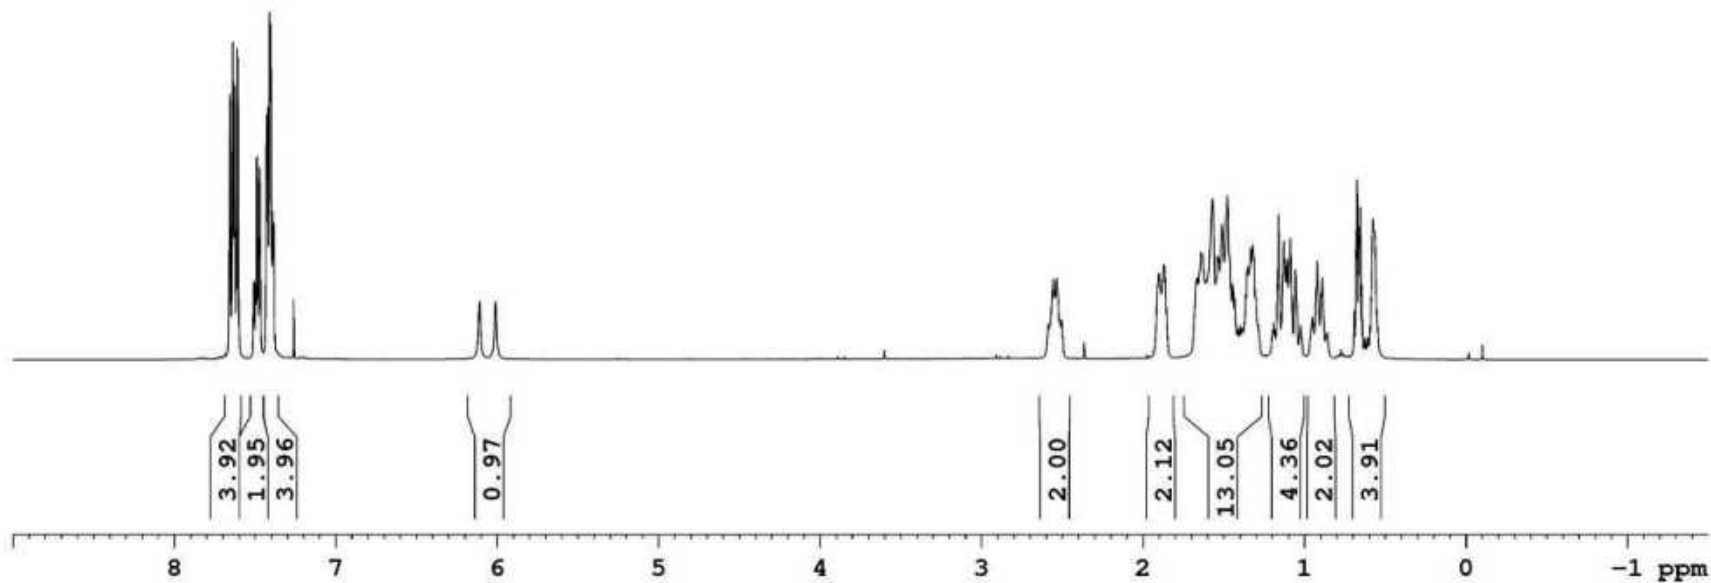

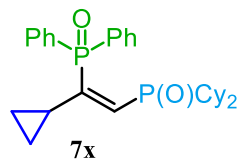

152.83  
151.94  
137.10  
136.25  
132.25  
132.22  
132.20  
131.82  
131.72  
131.17  
128.66  
128.54

38.97  
38.30  
26.75  
26.71  
26.35  
26.32  
26.29  
26.18  
26.16  
25.77  
17.74  
17.60  
17.54  
17.40  
11.58  
11.56

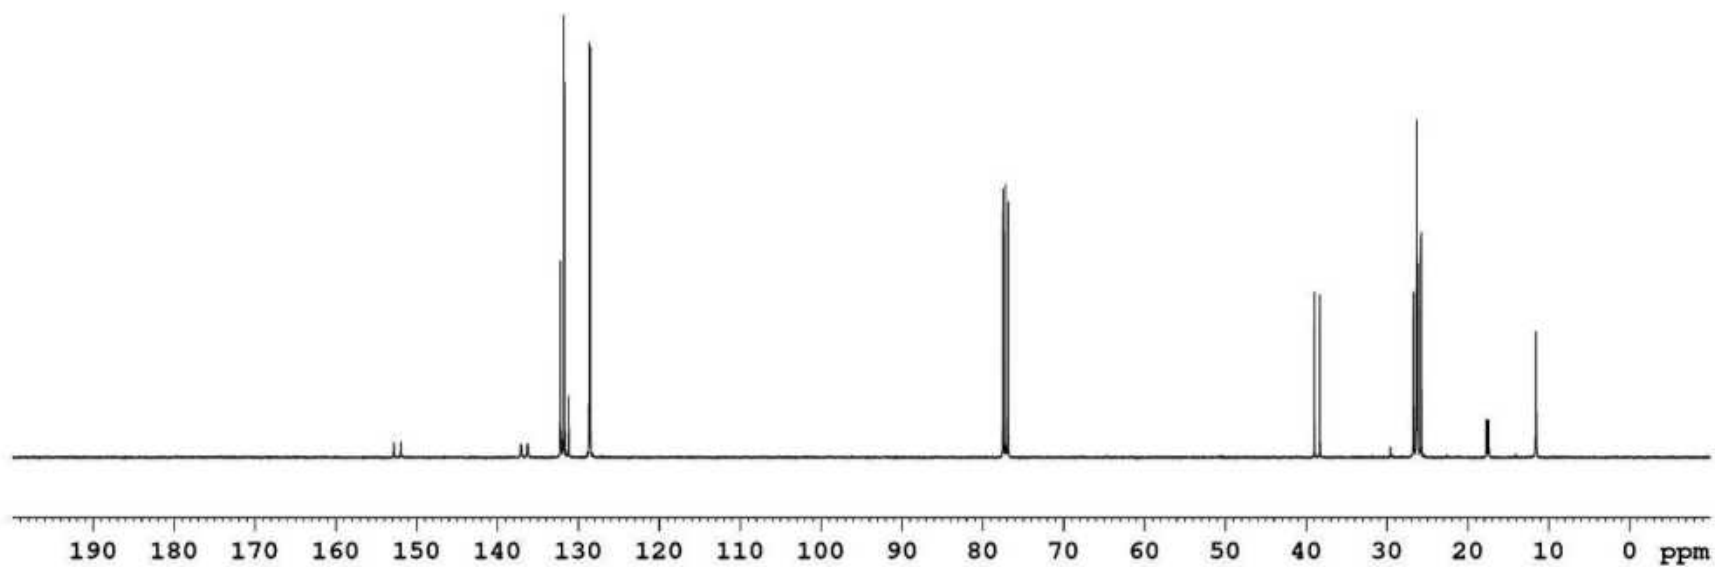

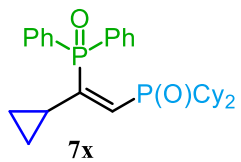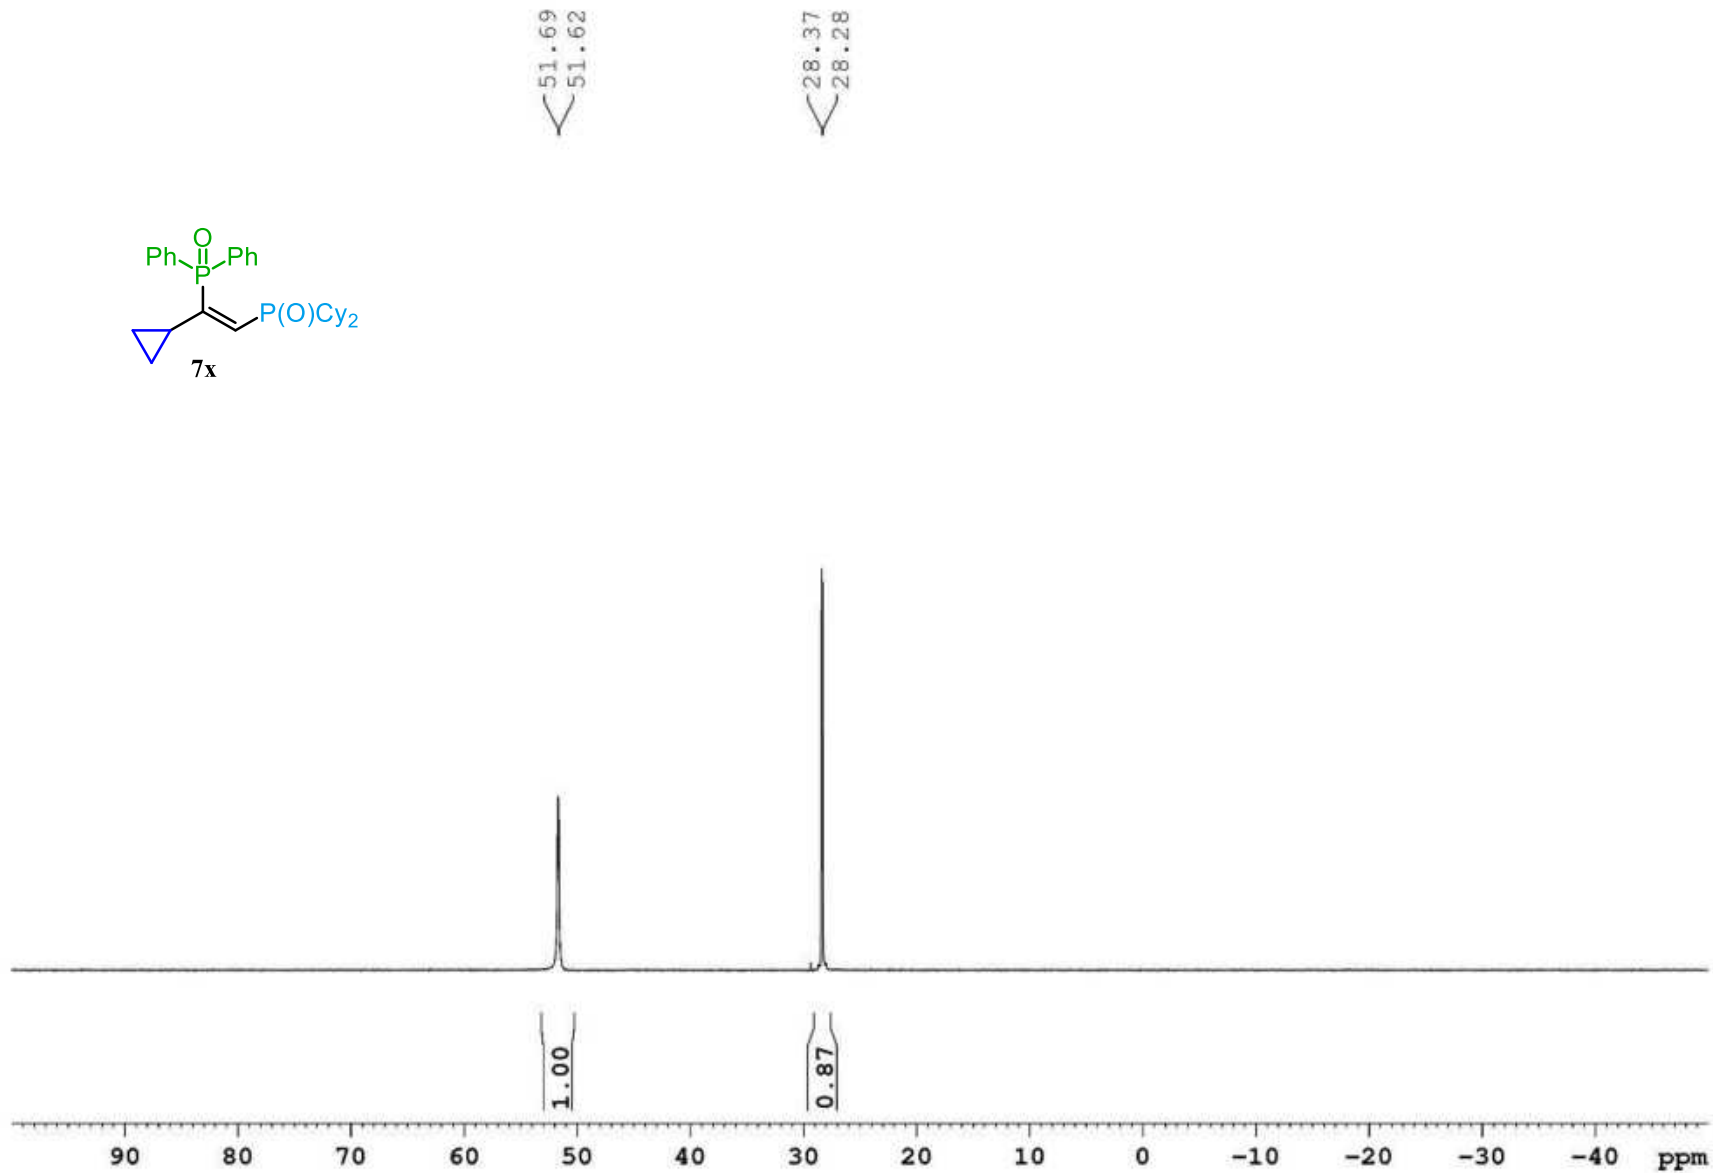

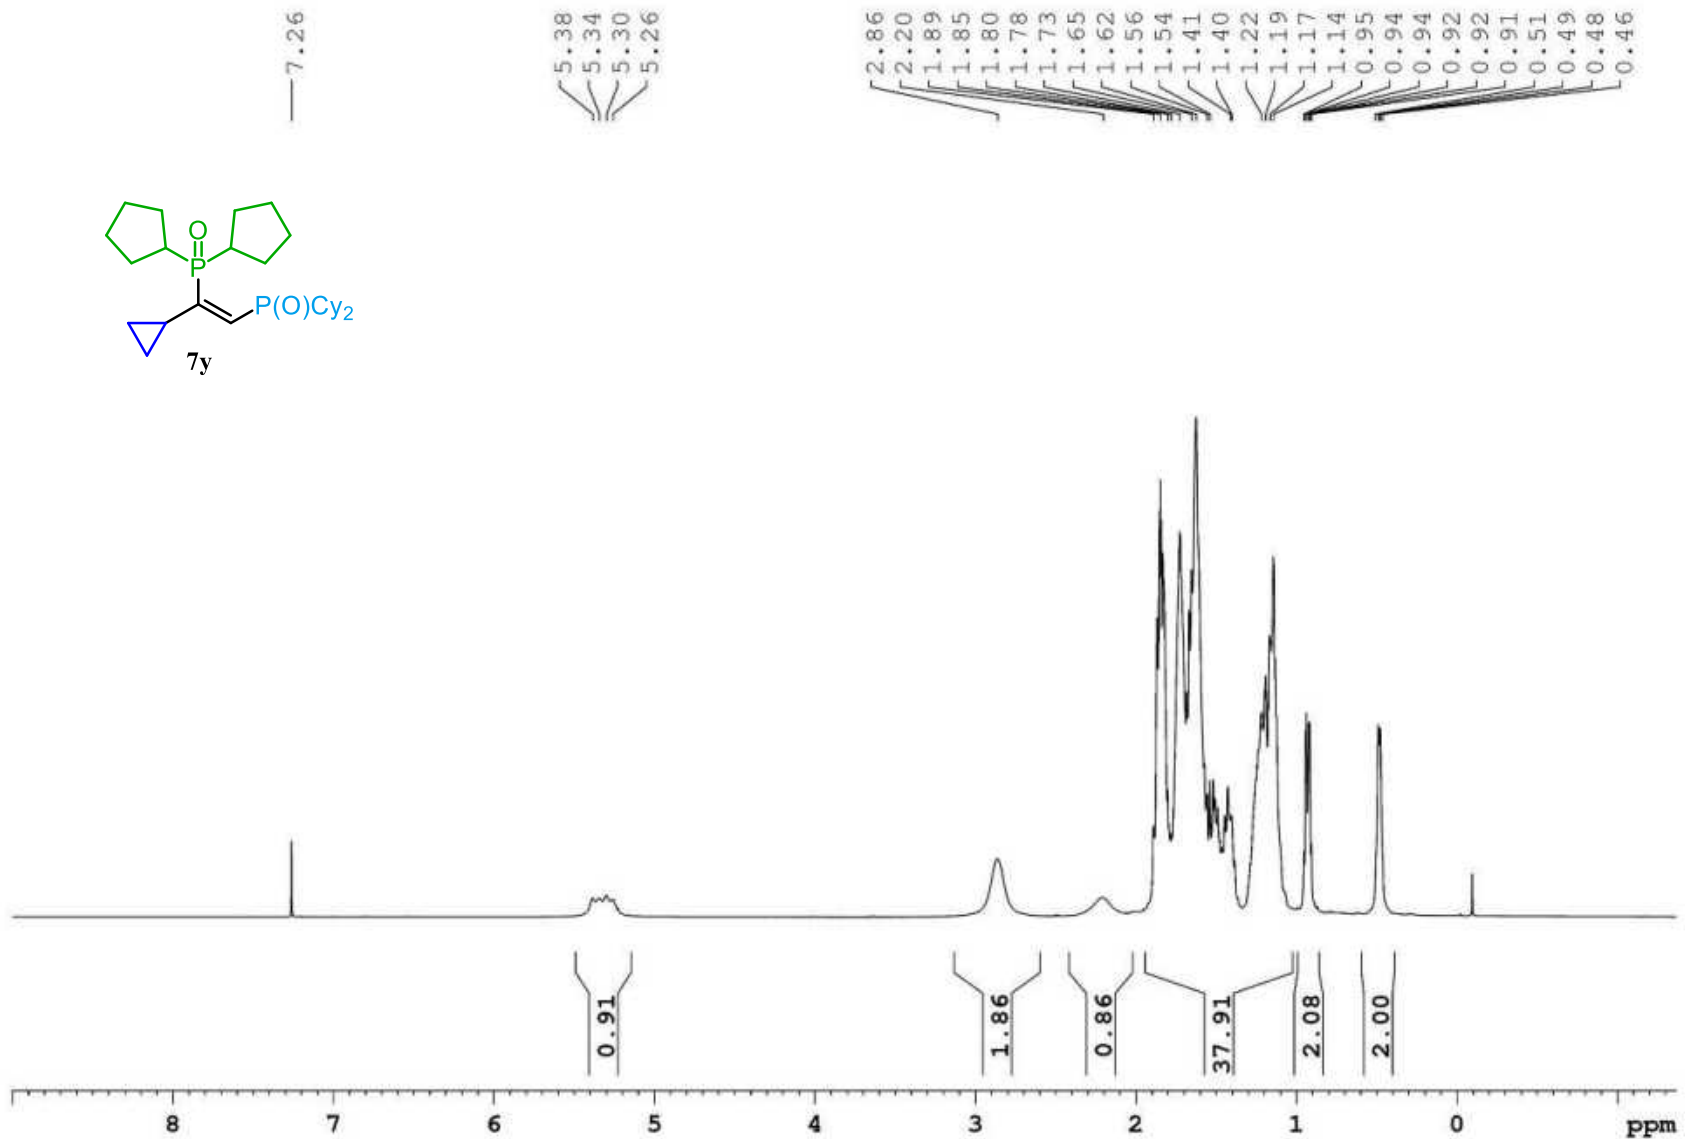

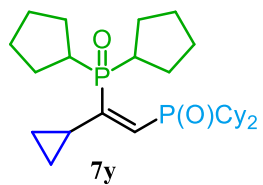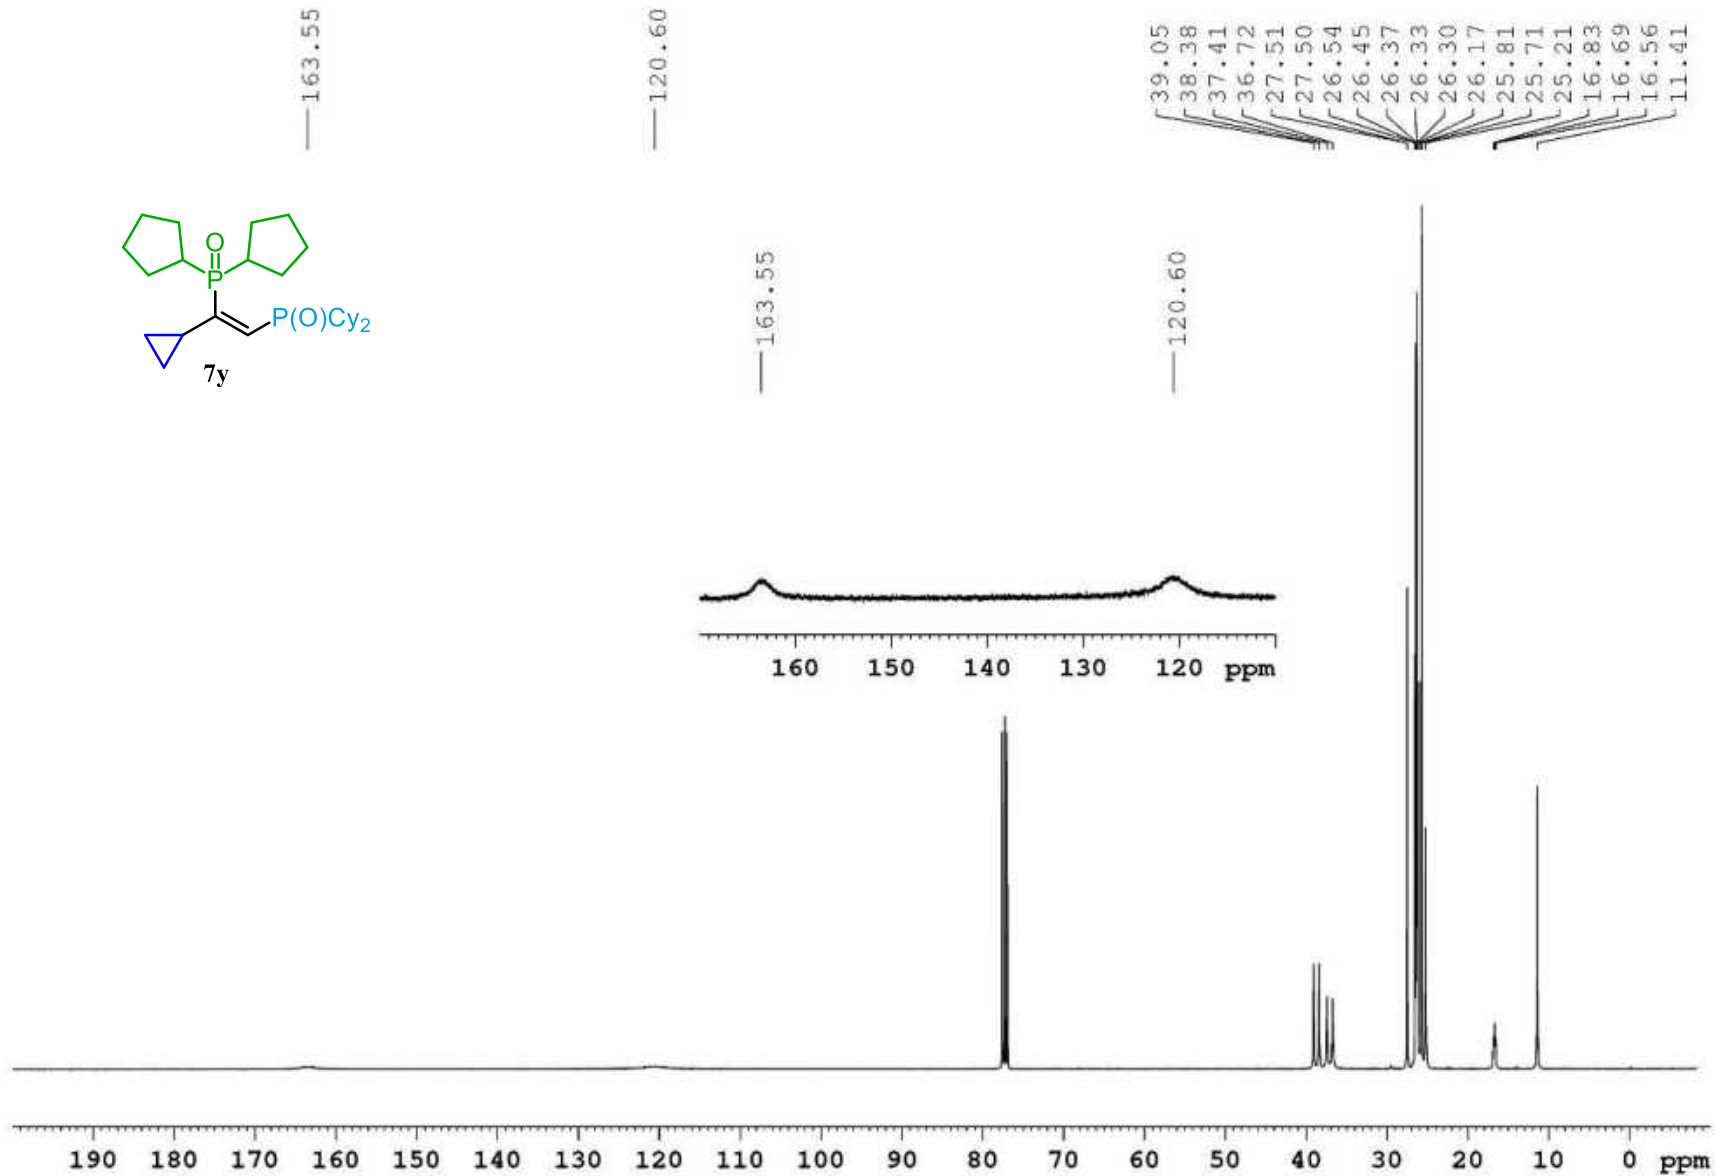

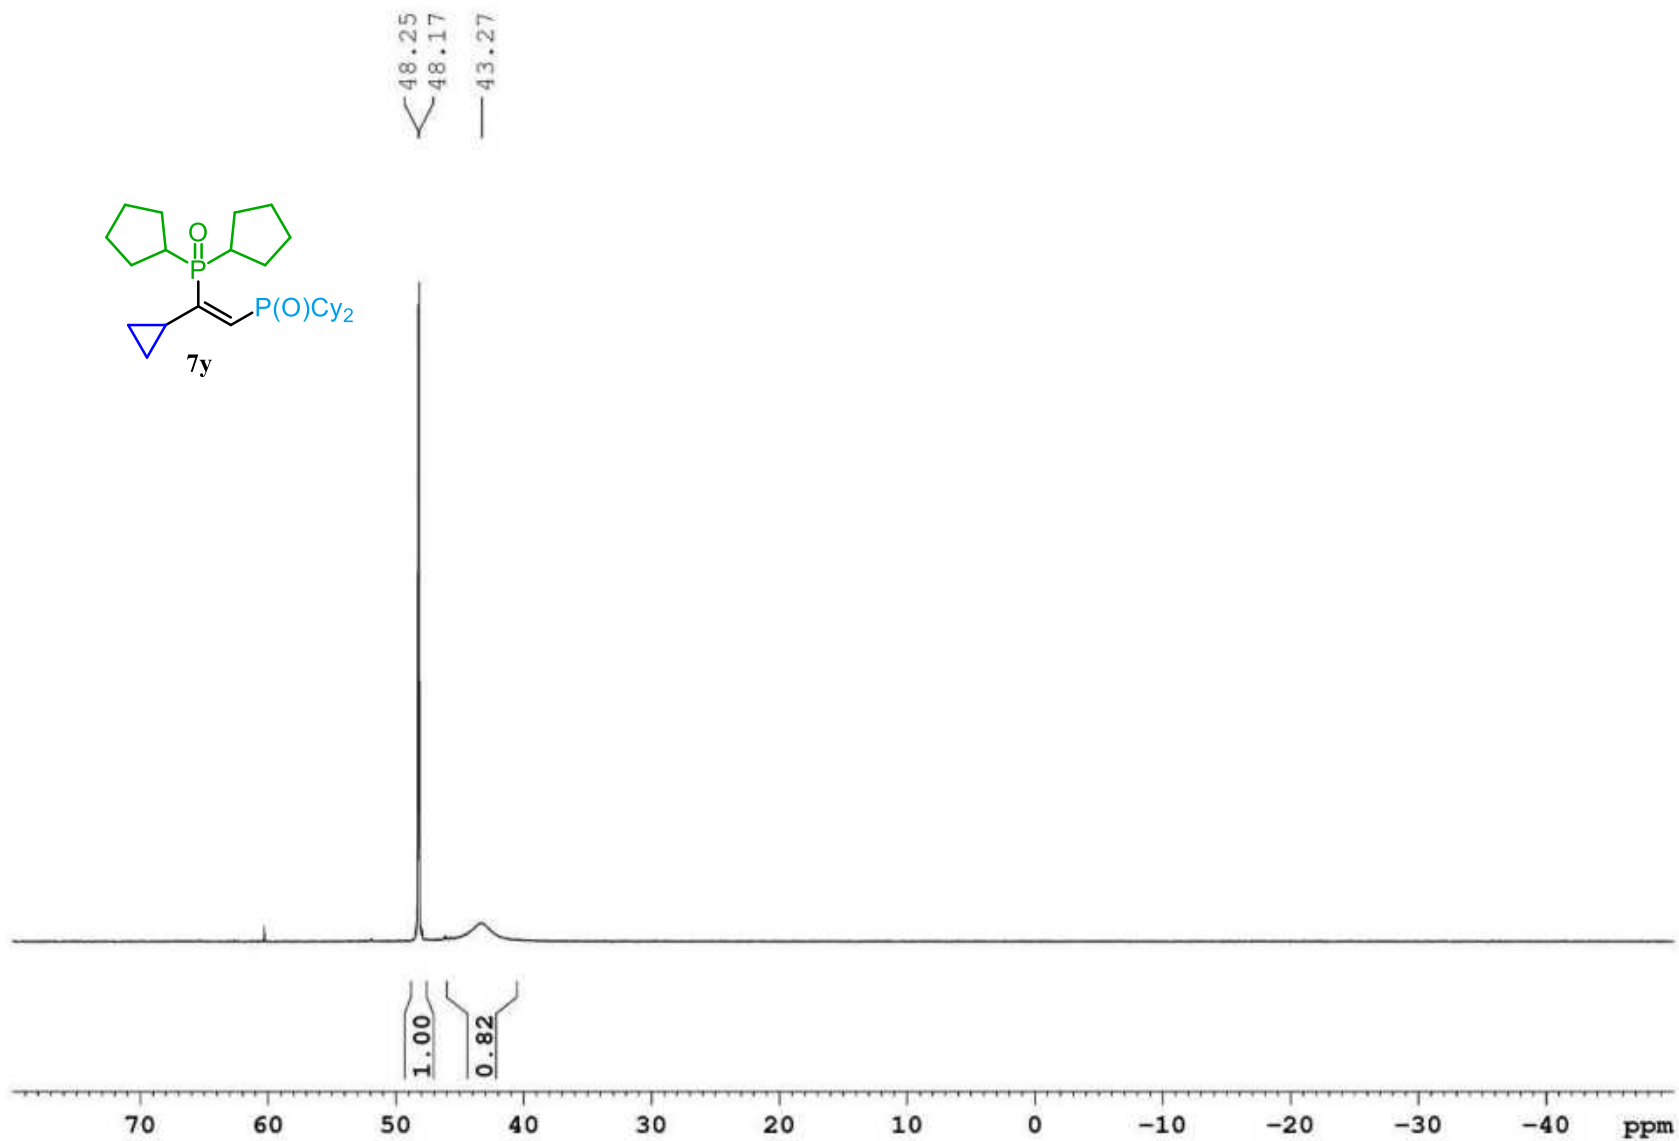

7.80  
7.75  
7.65  
7.60  
7.43  
7.35  
7.33  
7.31  
7.29  
7.20  
7.19  
7.18  
6.27  
6.22  
6.18  
6.13

3.51  
3.49  
3.47  
3.46  
3.44  
3.42  
2.23  
2.20  
2.19  
2.16  
1.14  
1.12  
1.11  
1.08  
1.06  
1.05  
0.96  
0.96  
0.92  
0.91  
0.91  
0.90  
0.87  
0.86  
0.86  
0.54  
0.50  
0.45

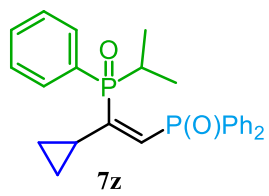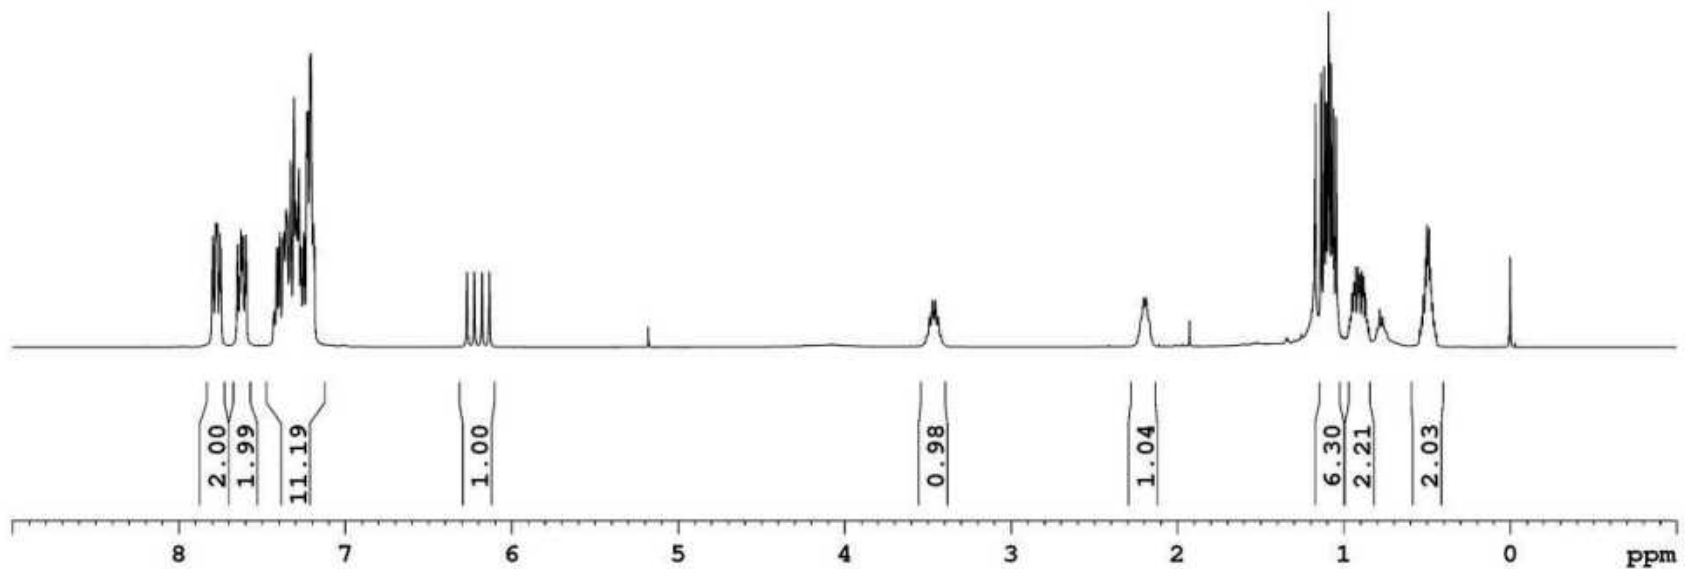

160.14  
159.41  
133.67  
133.59  
132.59  
132.52  
131.39  
130.75  
130.66  
130.59  
130.57  
130.43  
130.40  
130.31  
130.28  
129.98  
129.89  
129.60  
129.50  
127.58  
127.46  
127.38  
127.26  
127.13  
127.02  
126.34  
126.25  
125.33  
125.24

24.93  
24.23  
16.28  
16.15  
16.10  
15.97  
14.42  
14.40  
14.19  
14.16  
10.02  
10.00  
9.49

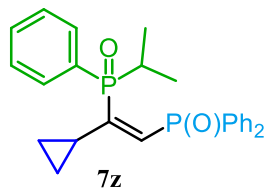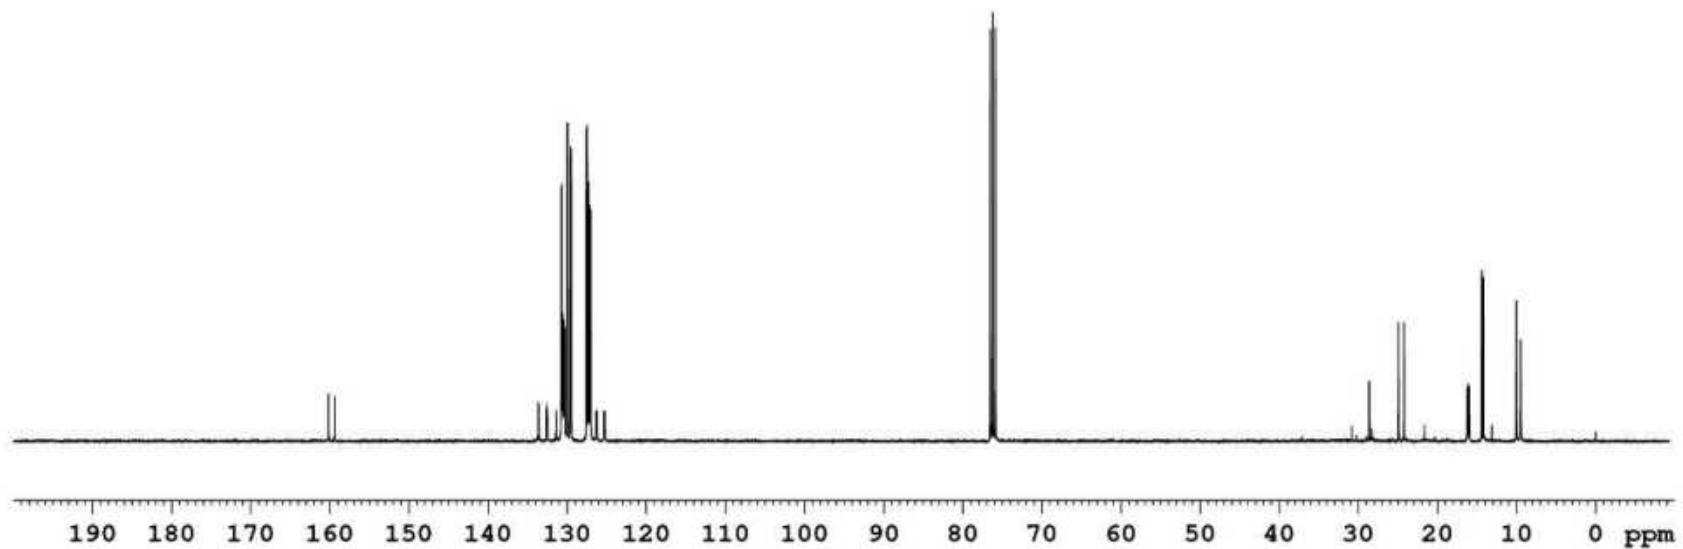



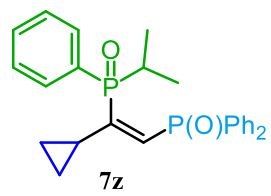

40.16  
40.06

20.11  
20.01

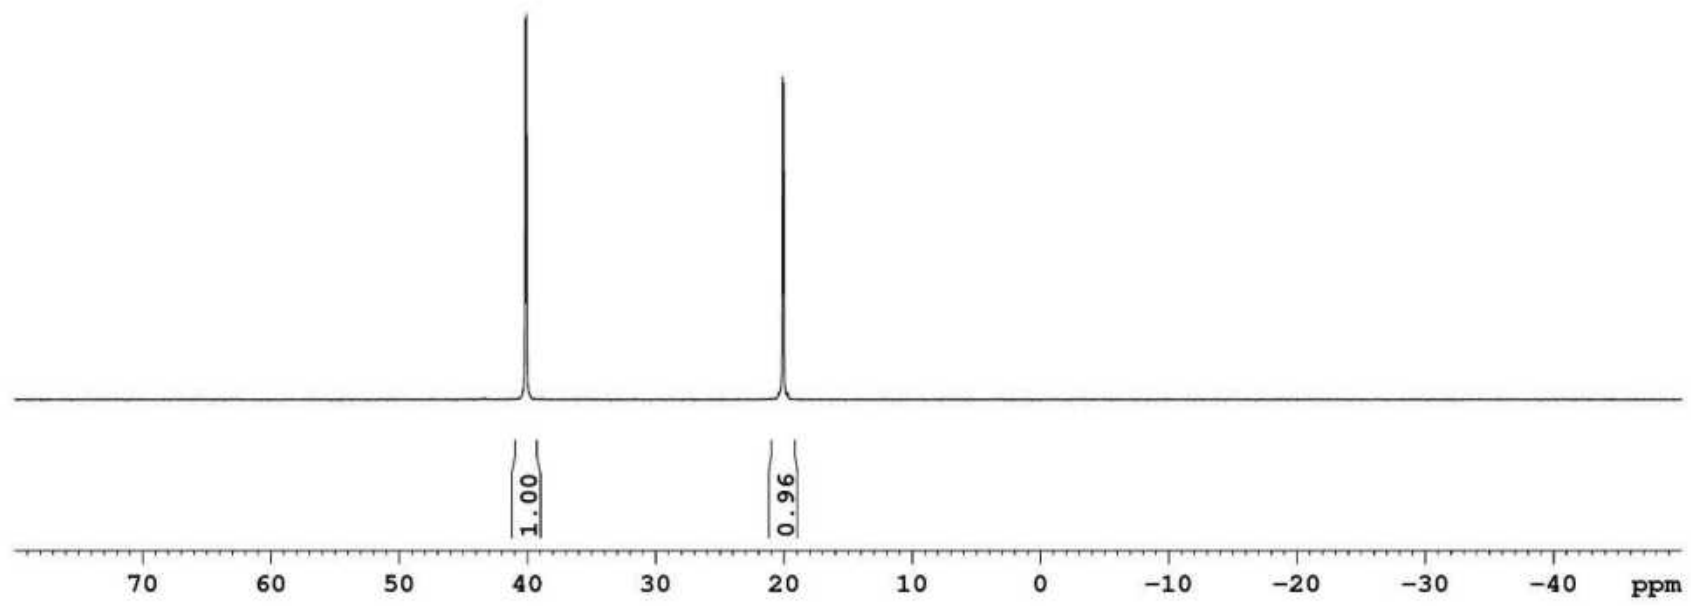

7.82  
7.80  
7.79  
7.77  
7.66  
7.62  
7.61  
7.52  
7.49  
7.48  
7.45  
7.42  
7.38  
7.35  
7.34  
7.30  
7.28  
7.27  
7.26  
6.39  
6.34  
6.29  
6.25  
5.88  
5.83  
5.82  
5.80  
5.76  
5.19  
5.15  
5.14  
5.12  
3.73  
3.71  
3.69  
3.66  
3.61  
3.57  
2.31  
2.28  
1.03  
1.02  
1.02  
1.00  
0.99  
0.97  
0.93  
0.66  
0.64  
0.63  
0.62  
0.61  
0.54  
0.53  
0.52  
0.52  
0.51  
0.49

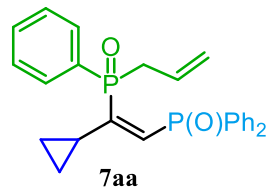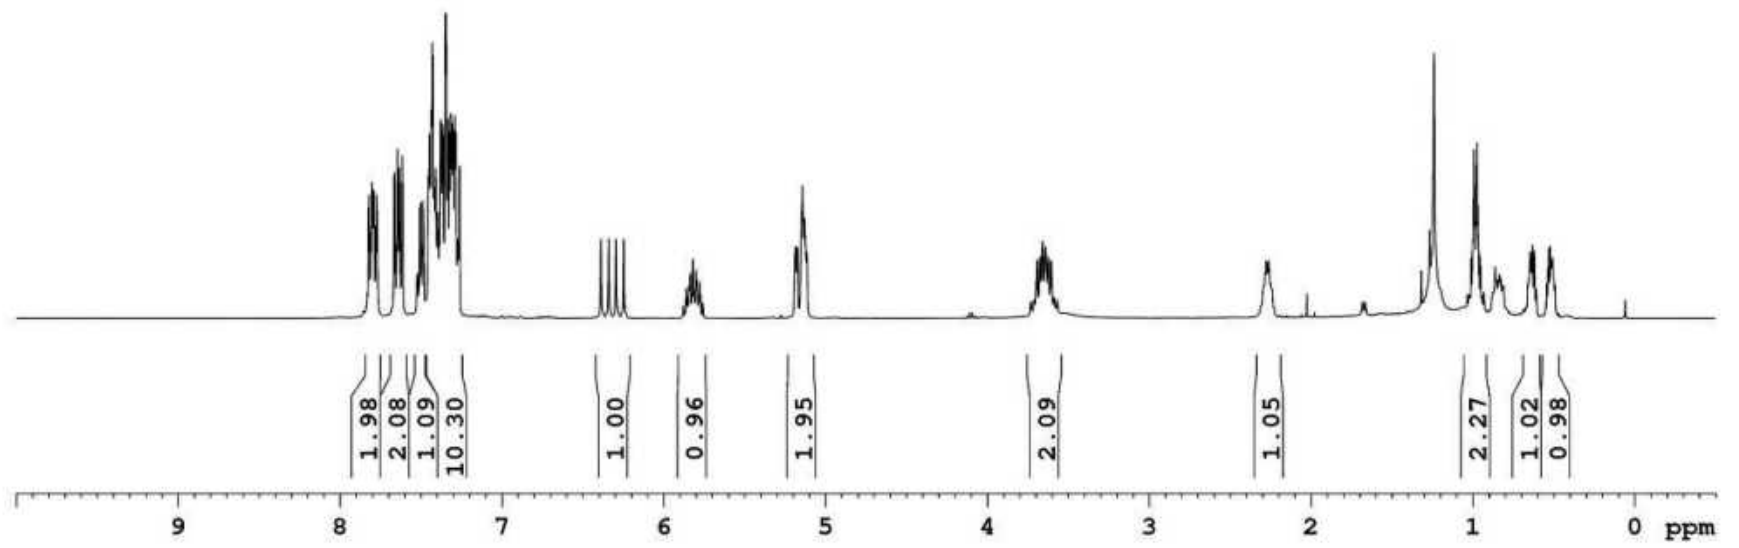

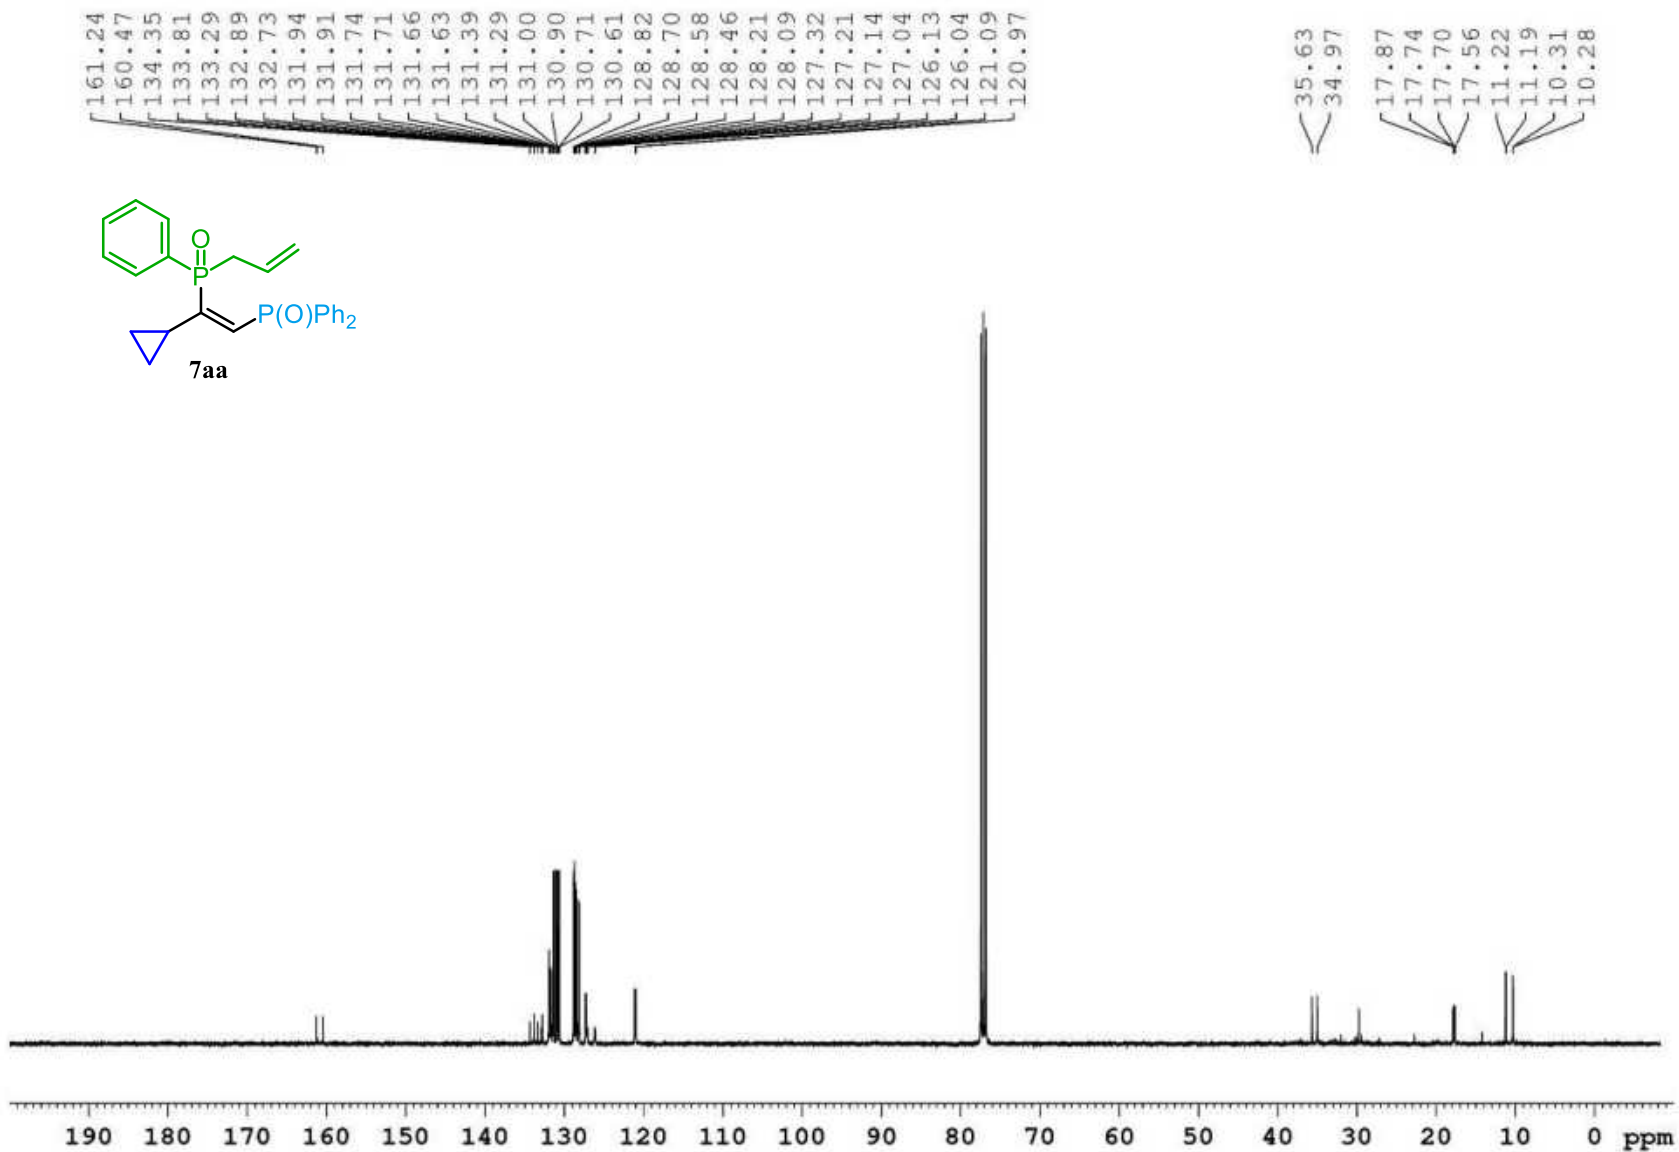

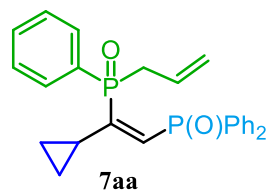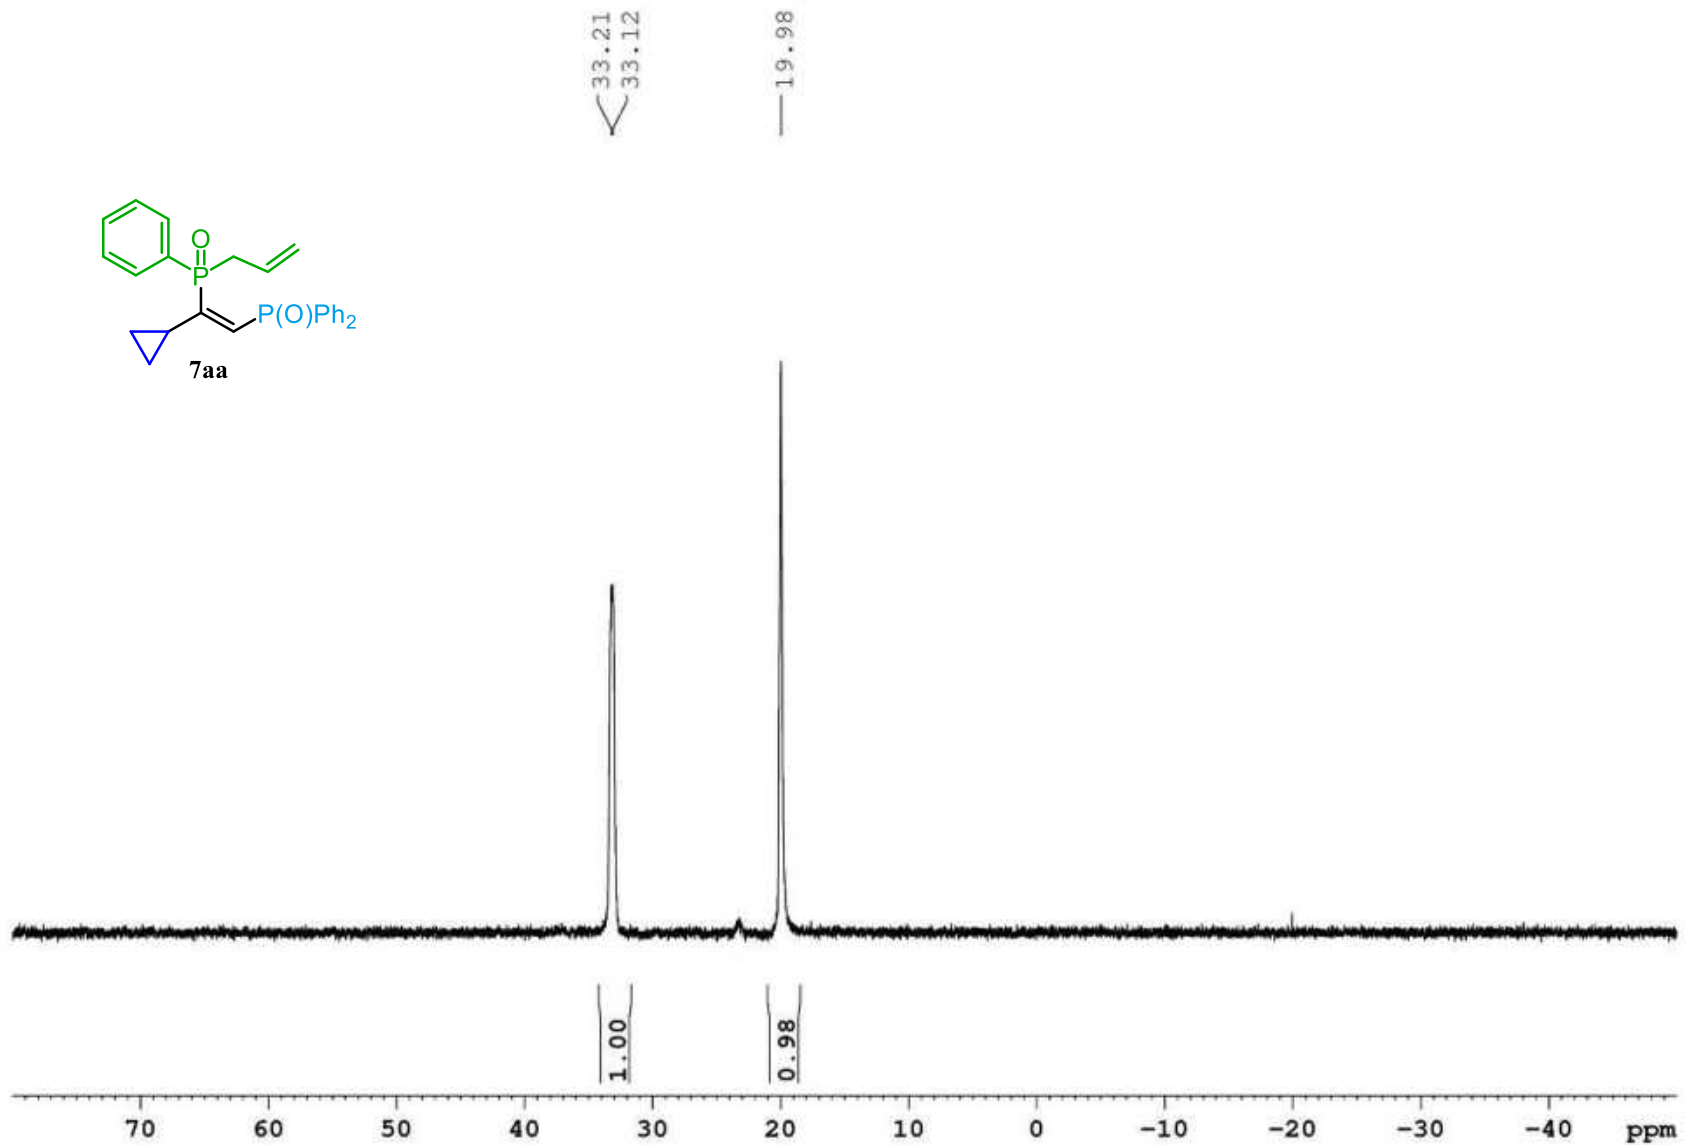

7.69  
7.67  
7.65  
7.63  
7.54  
7.52  
7.49  
7.47  
7.46  
7.44  
7.44  
7.26  
6.75  
6.70  
6.66  
6.61

2.84  
2.83  
2.81  
2.78  
2.76  
2.03  
2.03  
2.00  
1.75  
1.74  
1.71  
1.55  
1.54  
1.54  
1.53  
1.52  
1.39  
1.35  
1.26  
1.23  
1.16  
1.10  
1.07  
0.90  
0.88  
0.85  
0.81  
0.78

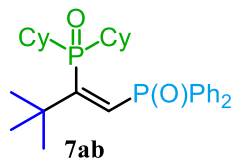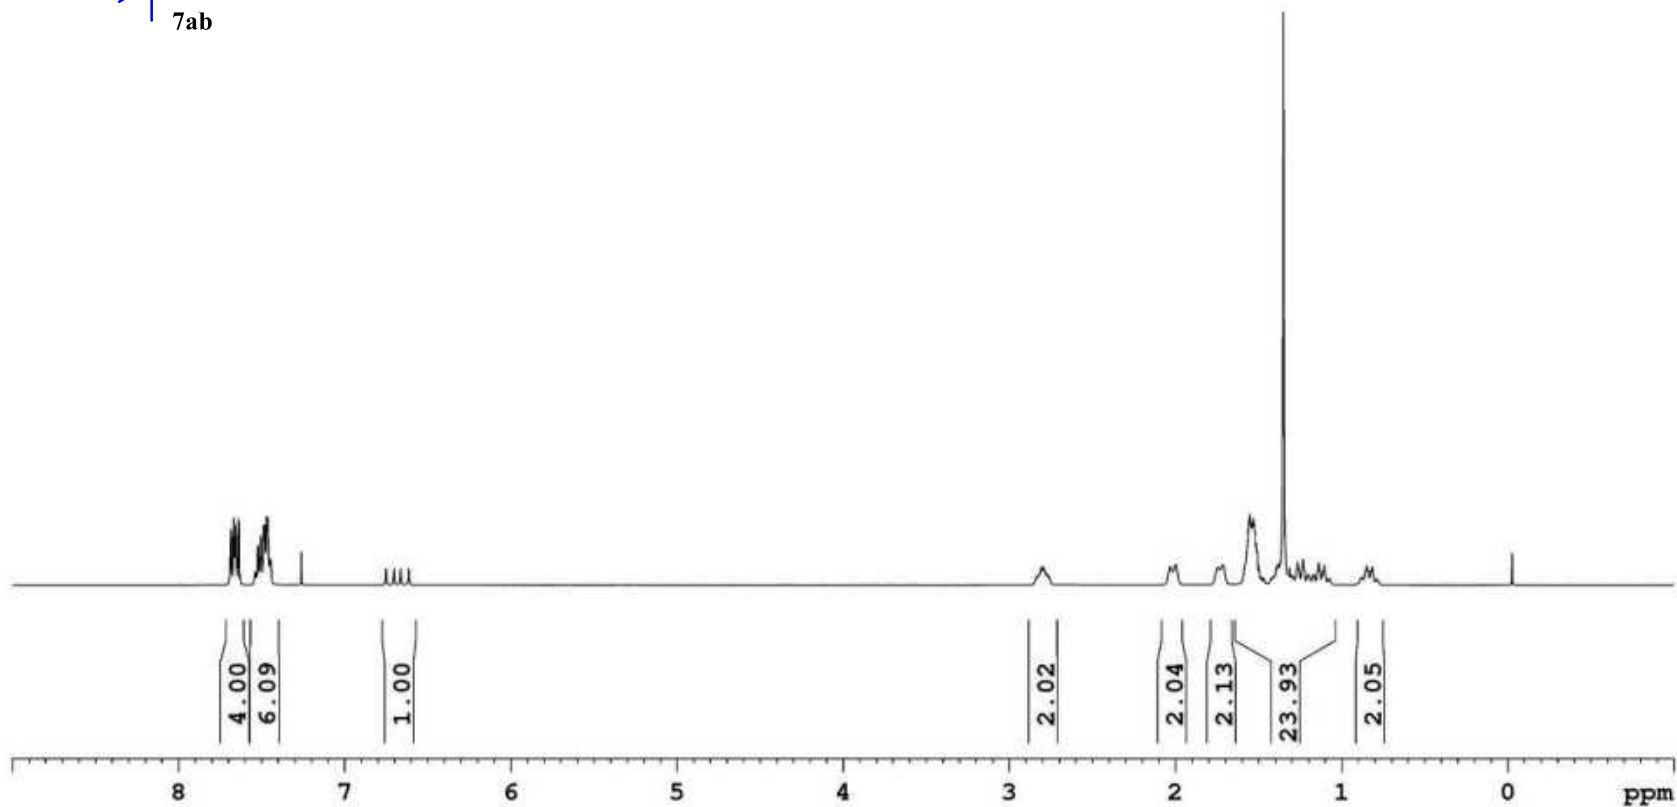



167.50  
166.94

134.43  
133.38  
131.91  
131.88  
130.76  
130.66  
128.95  
128.83  
127.26  
127.16  
126.29  
126.19

42.49  
42.43  
42.34  
42.28  
39.95  
39.32  
30.36  
30.34  
27.26  
27.22  
26.68  
26.65  
26.44  
26.31  
25.85

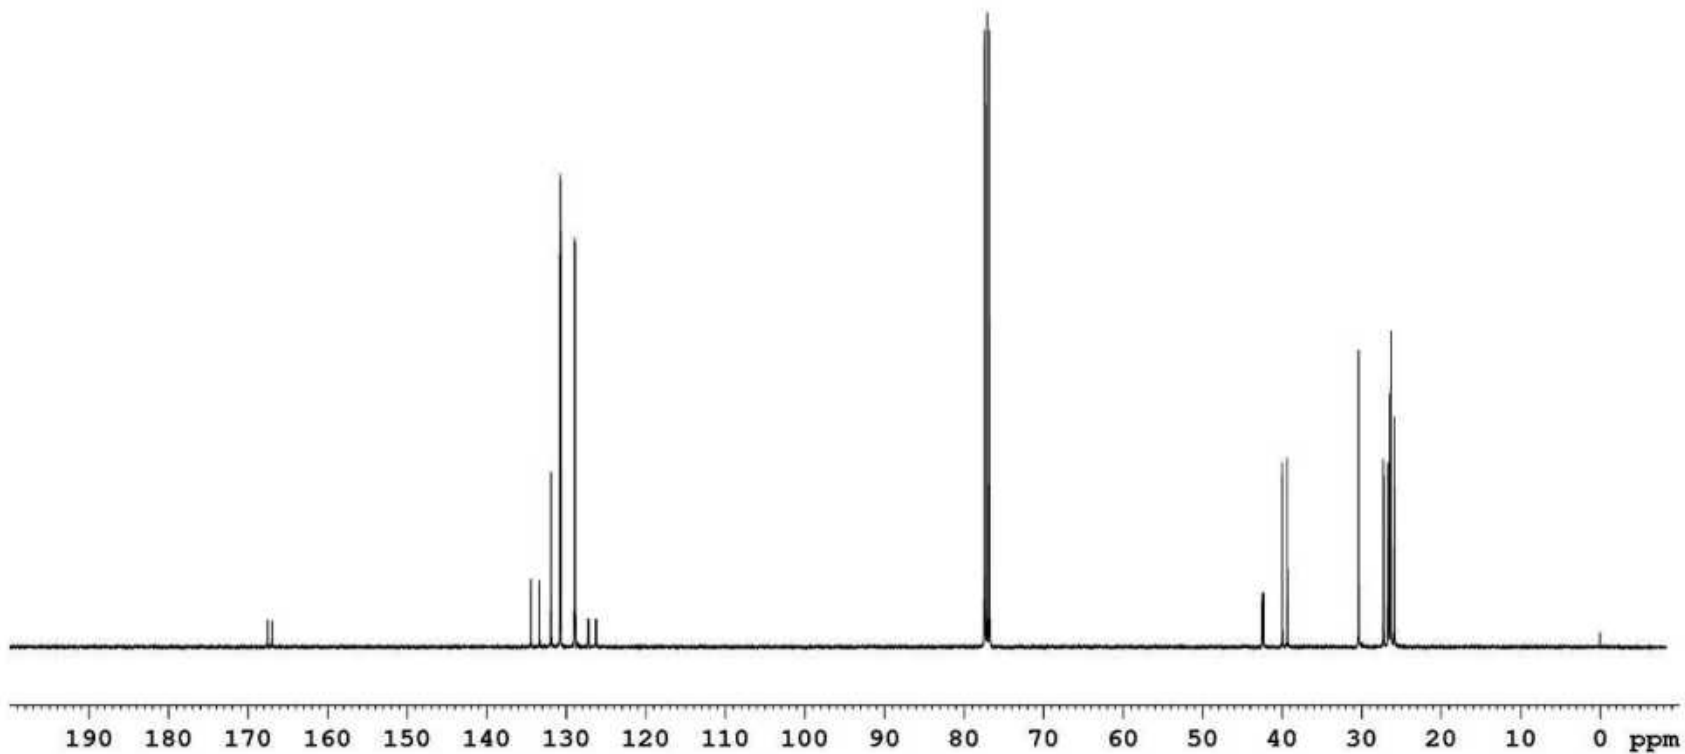

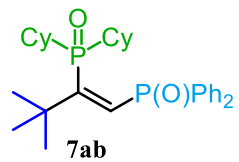

54.05  
53.95

17.94  
17.84

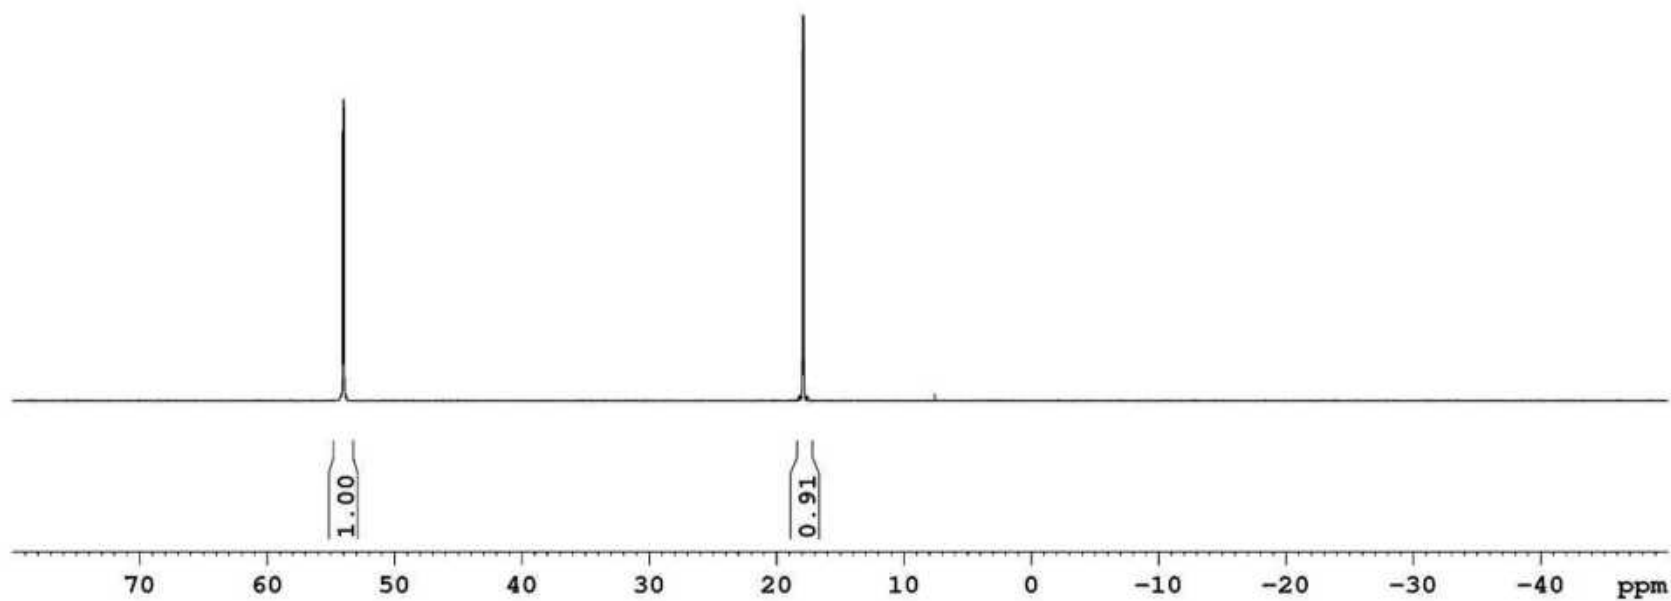

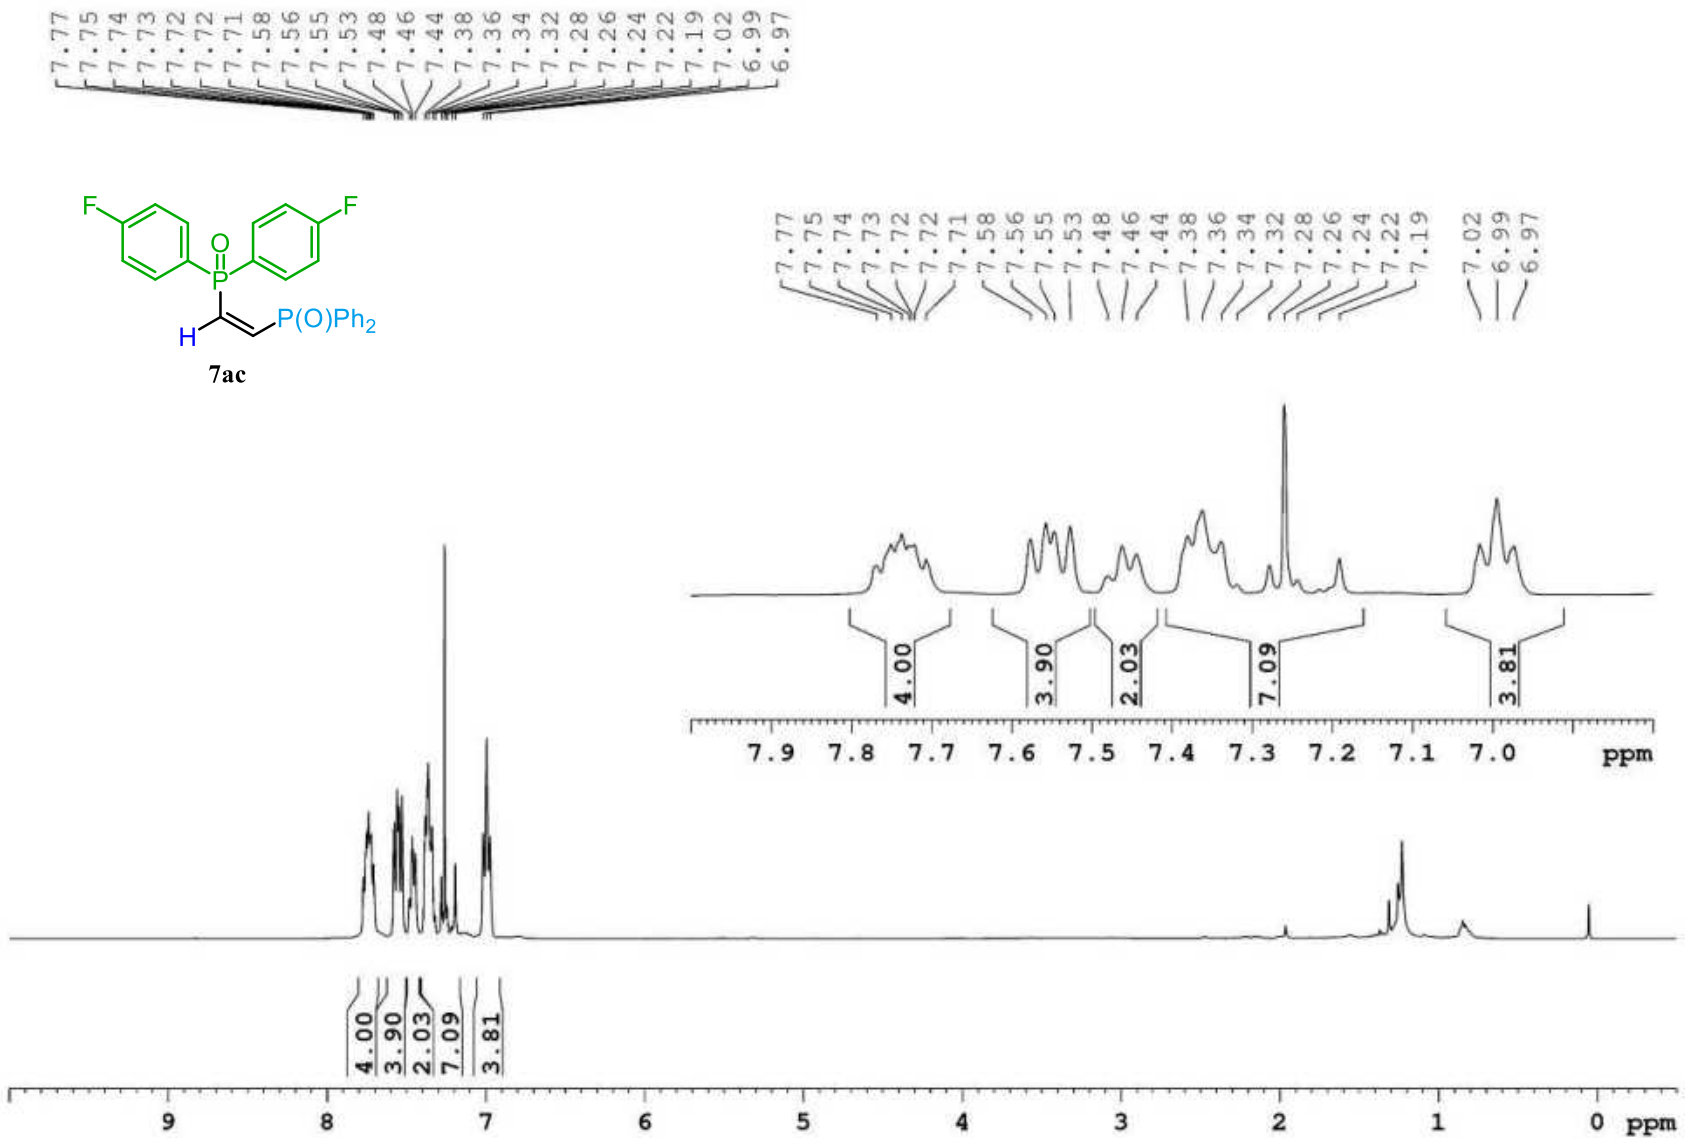



165.32  
165.29  
162.80  
162.77  
143.42  
142.49  
141.87  
140.96  
133.39  
133.30  
133.28  
133.19  
131.84  
131.02  
130.99  
130.78  
129.95  
129.85  
127.62  
127.50  
127.19  
126.10  
114.84  
114.70  
114.62  
114.49

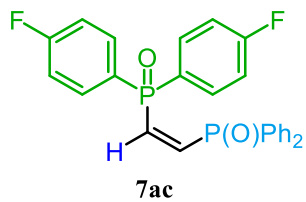

— 143.42  
— 142.49  
— 141.87  
— 140.96

133.39  
133.30  
133.28  
133.19  
131.84  
131.02  
130.99  
130.78  
129.95  
129.85  
127.62  
127.50  
127.19  
— 126.10

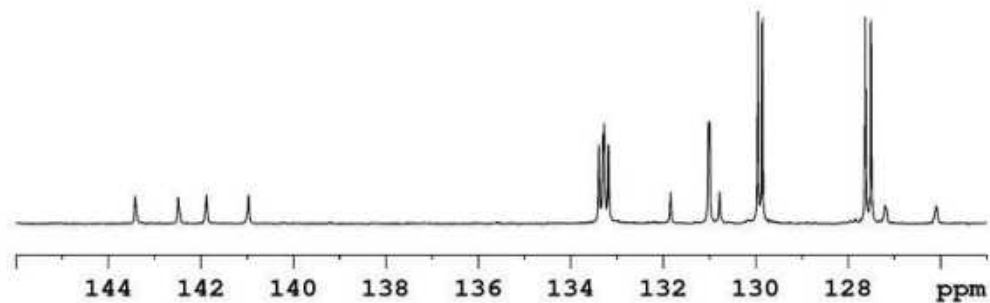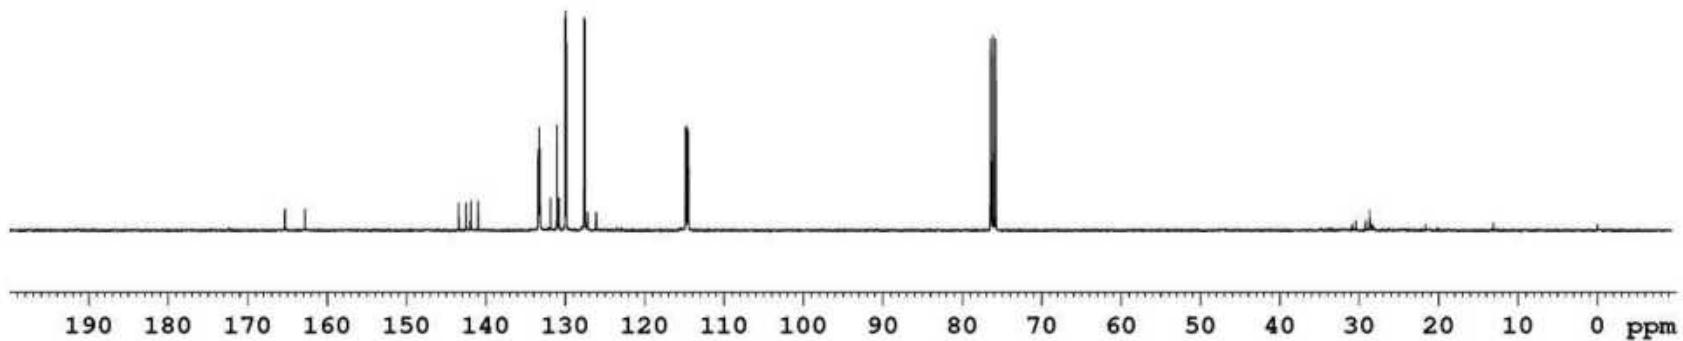

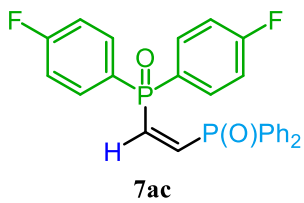

21.28  
21.15  
19.22  
19.09

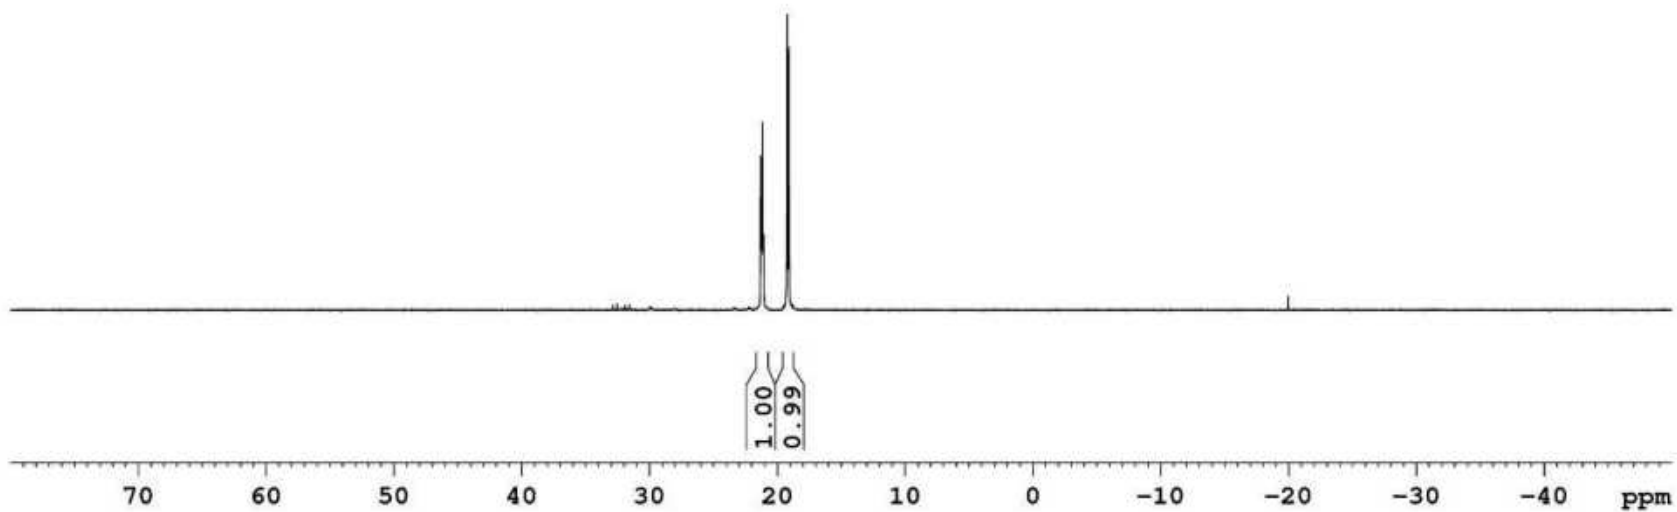

7.83  
7.82  
7.80  
7.57  
7.55  
7.55  
7.54  
7.52  
7.52  
7.50  
7.50  
7.49  
7.48  
7.47  
7.46  
7.44  
7.44  
7.40  
7.39  
7.38  
7.37  
7.36  
7.35  
7.33  
7.31  
7.26  
7.24  
7.18  
7.16

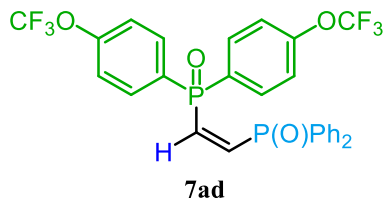

7.85  
7.83  
7.82  
7.80  
7.57  
7.55  
7.55  
7.54  
7.52  
7.52  
7.50  
7.50  
7.49  
7.48  
7.47  
7.46  
7.44  
7.44  
7.40  
7.39  
7.38  
7.37  
7.36  
7.35  
7.33  
7.31  
7.26  
7.24  
7.18

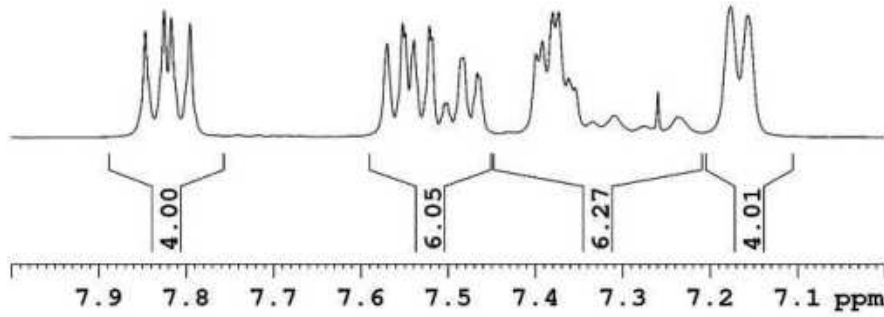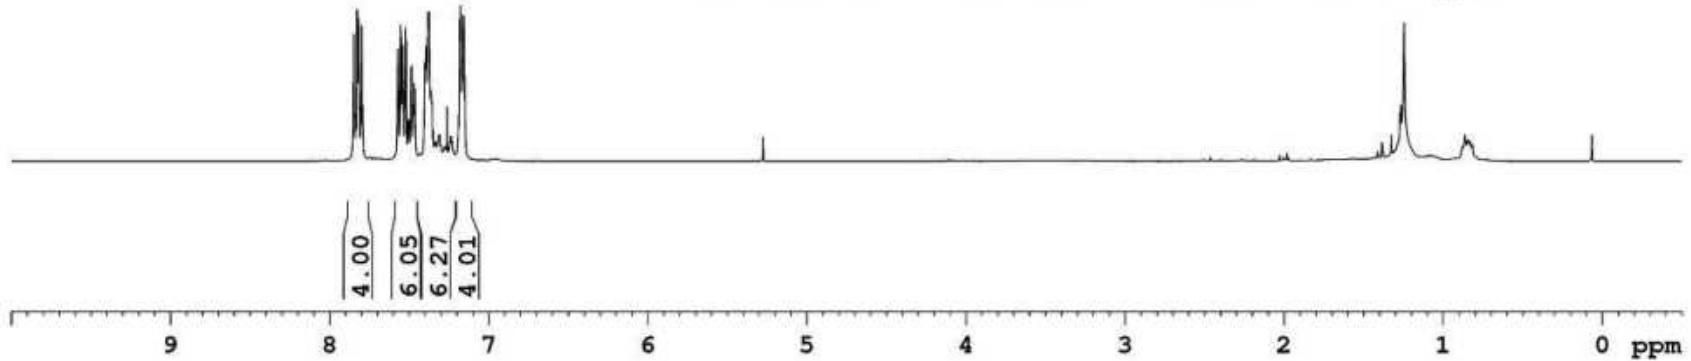

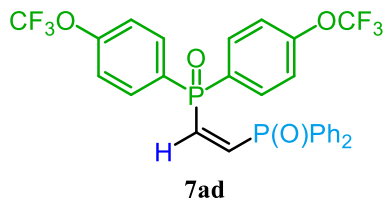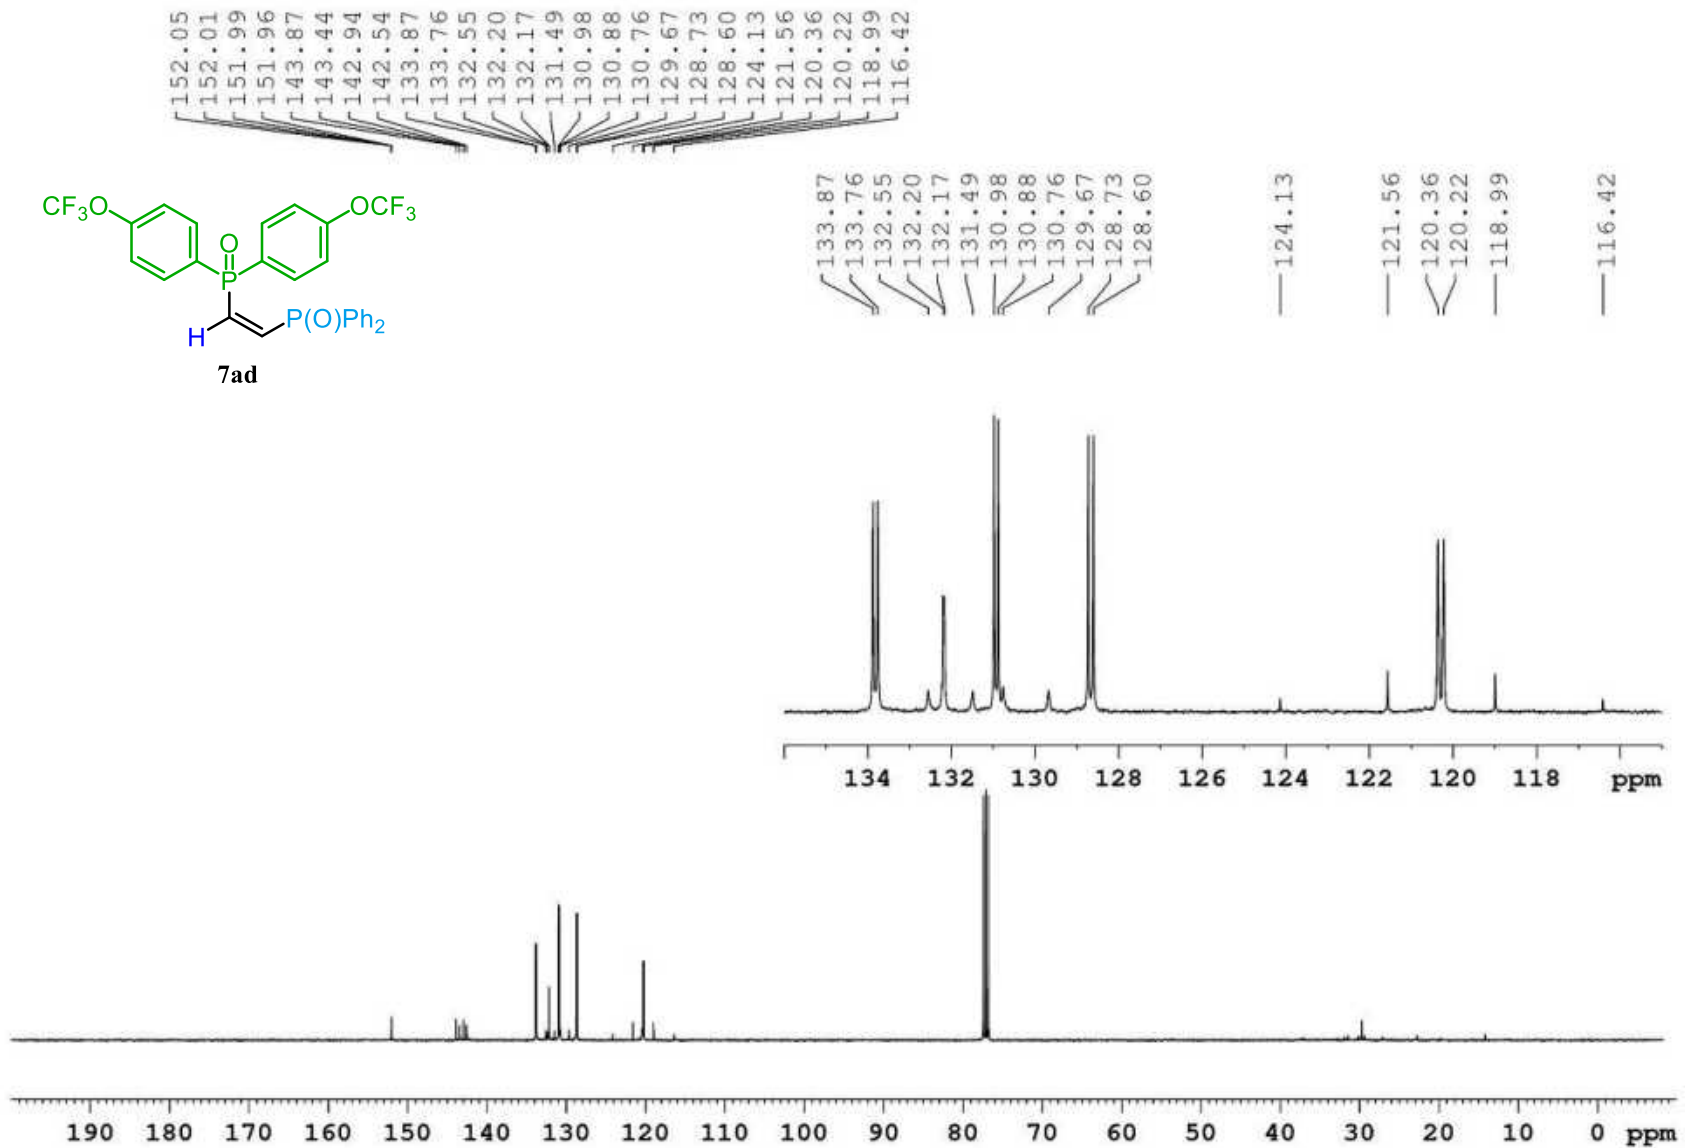

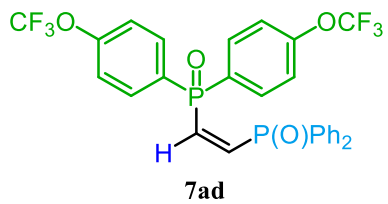

21.02  
20.89  
19.26  
19.14

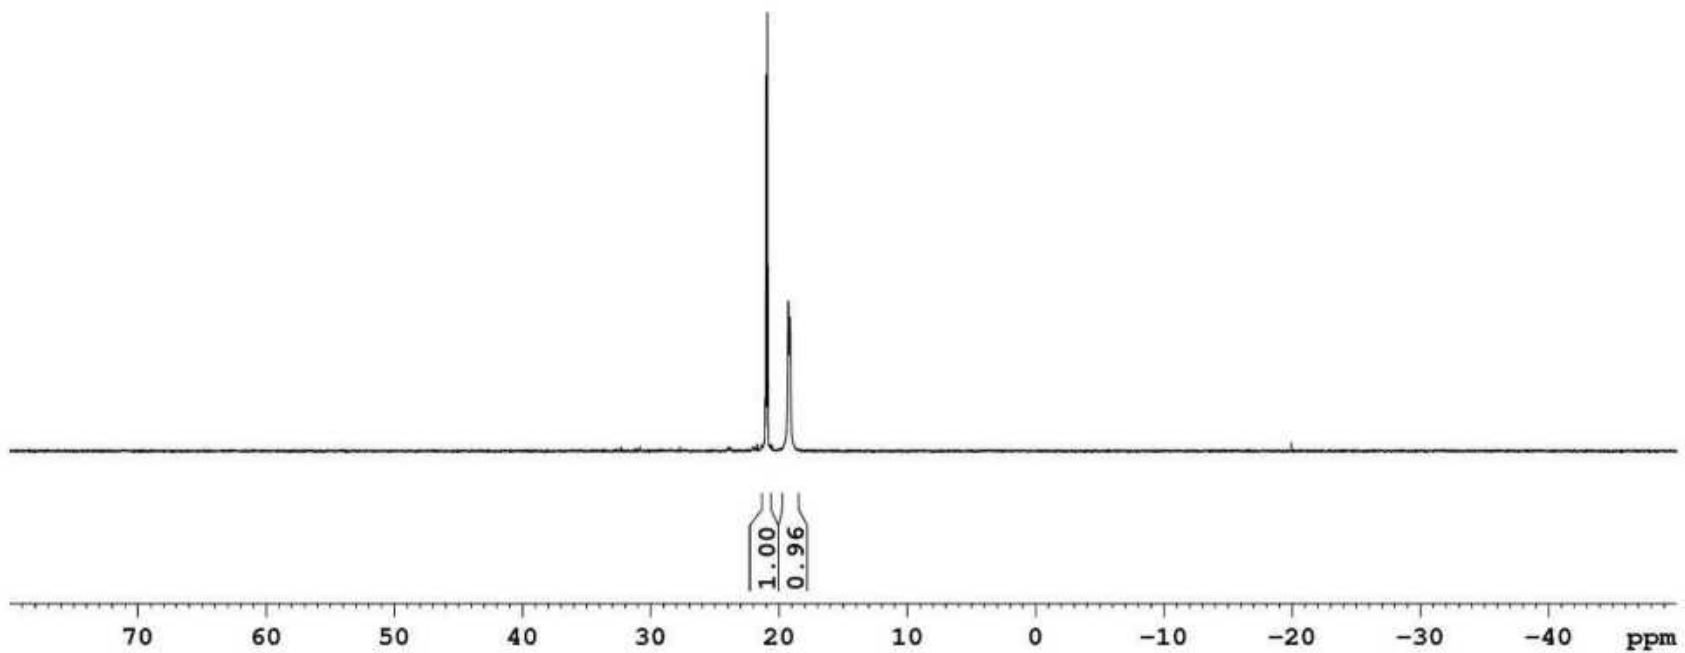

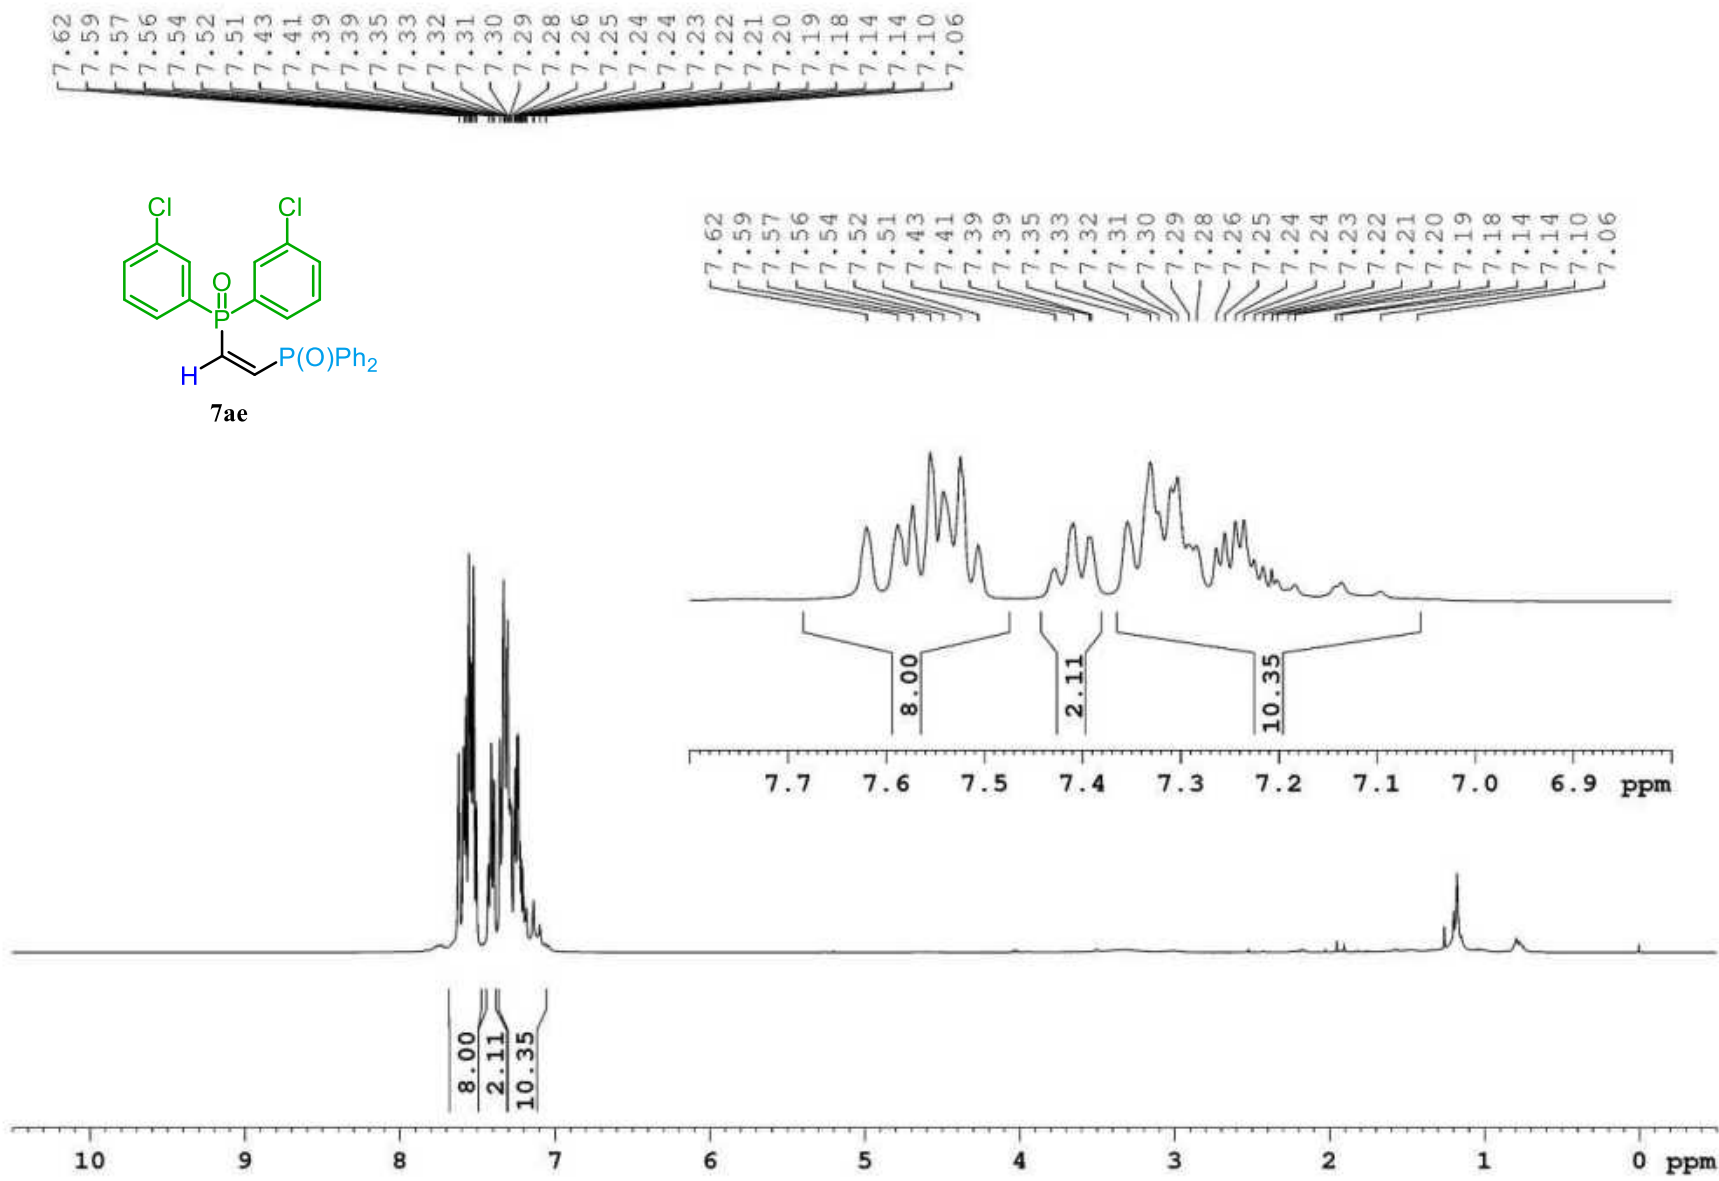

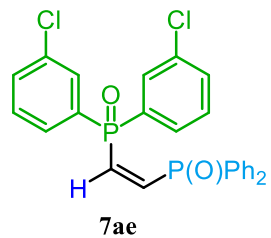

144.97  
144.07  
142.32  
141.39  
135.10  
134.99  
134.82  
134.05  
132.26  
132.19  
131.25  
131.20  
131.15  
131.05  
130.05  
129.92  
129.44  
129.34  
128.70  
128.58

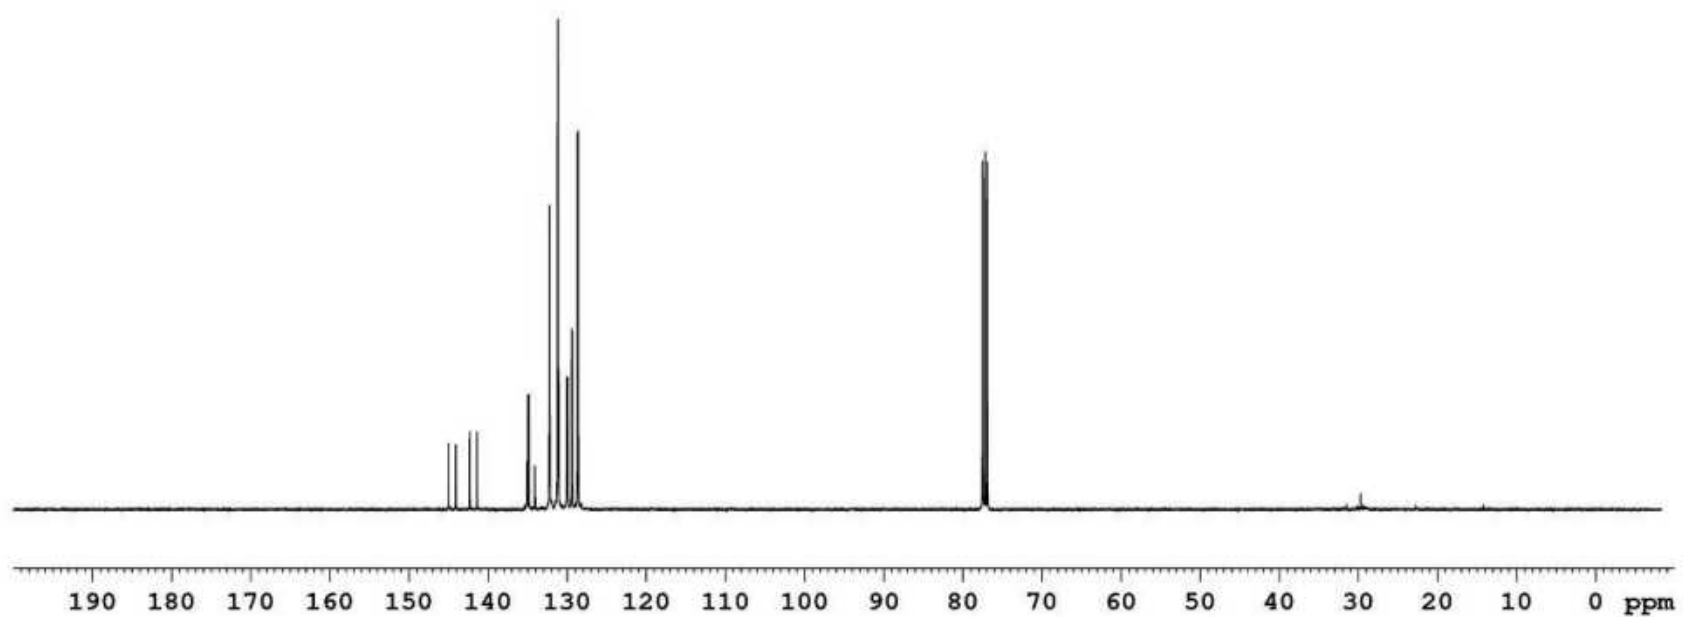



20.03  
19.91  
18.95  
18.82

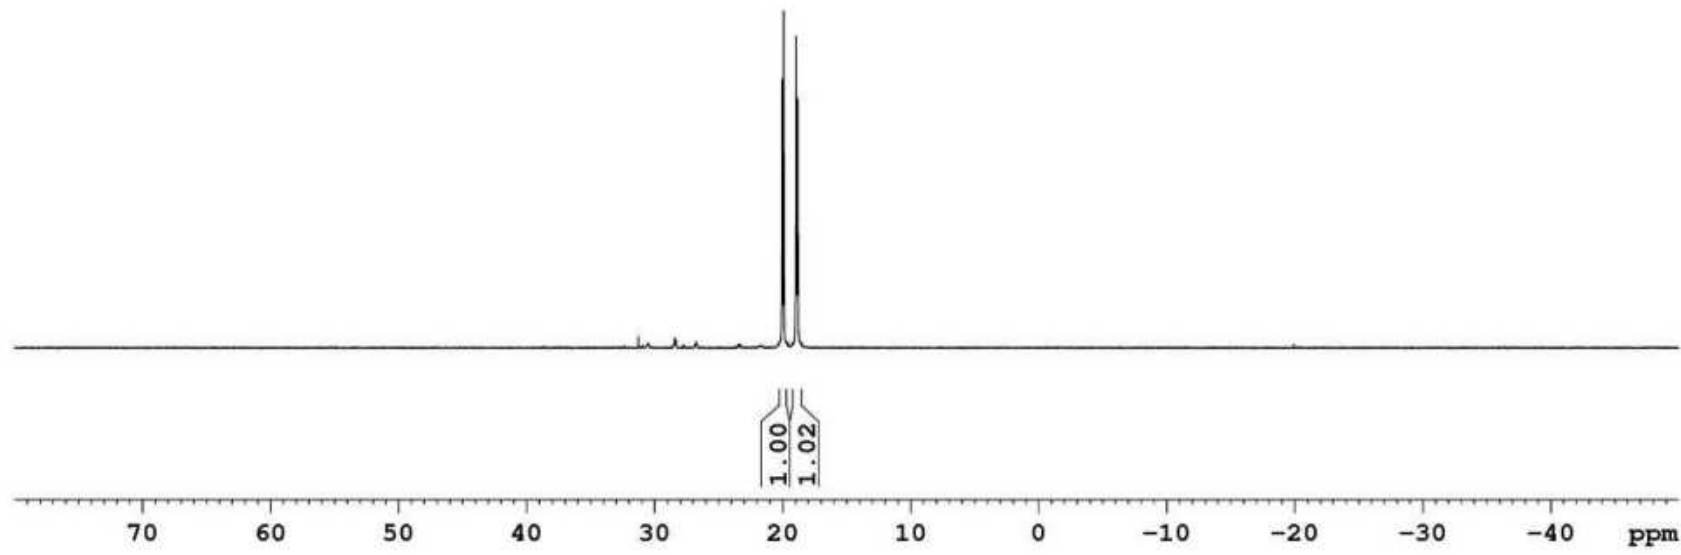



7.75  
7.73  
7.72  
7.70  
7.43  
7.40  
7.39  
7.38  
7.36  
7.35  
7.33  
7.32  
7.29  
7.28  
7.27  
7.26  
7.25  
7.21  
7.17  
7.15  
7.12  
7.11  
7.09

2.29

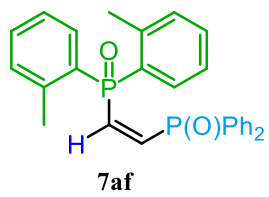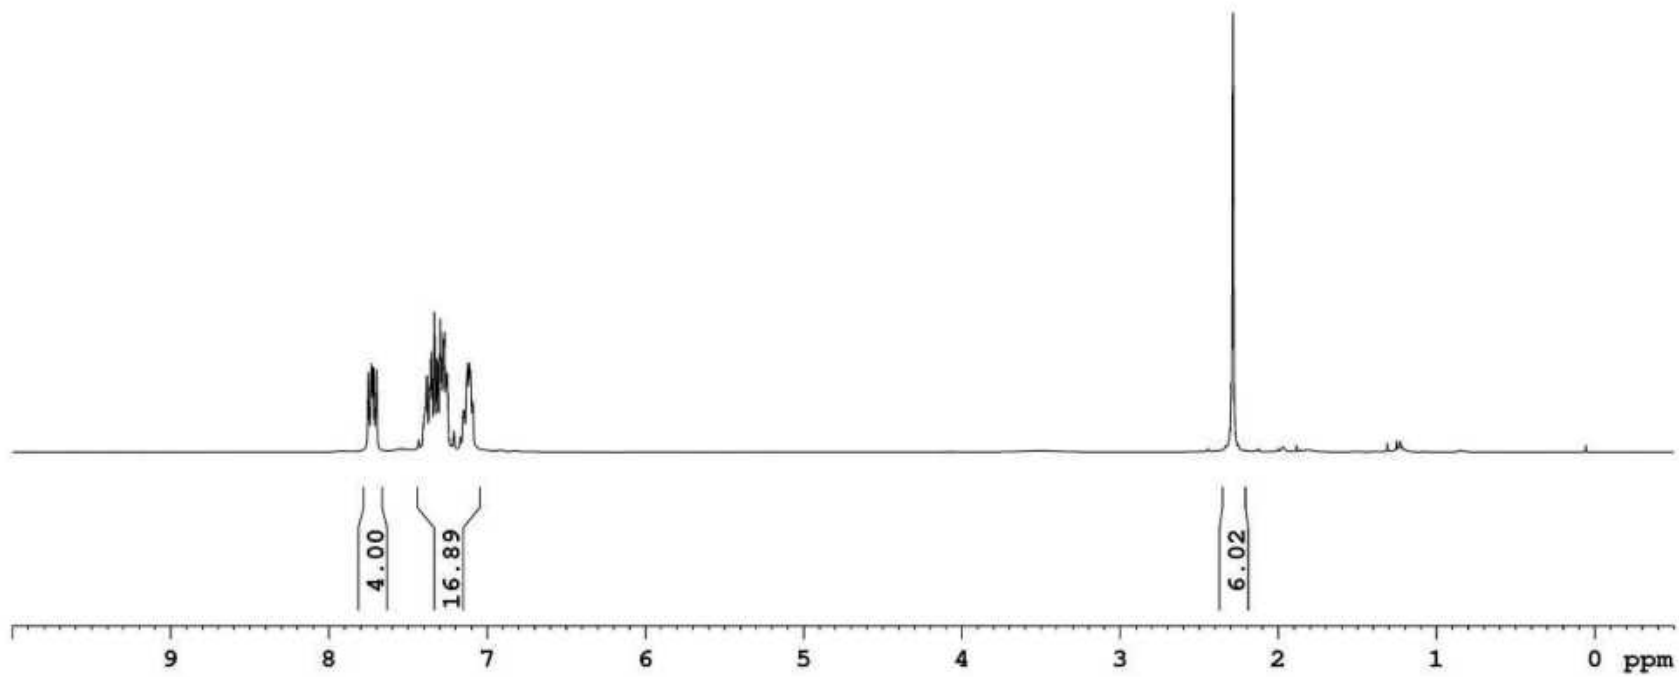

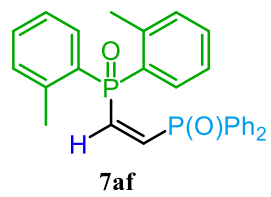

144.50  
143.59  
143.42  
142.52  
141.88  
141.80  
132.75  
132.62  
132.48  
132.09  
132.06  
131.82  
131.80  
131.70  
131.66  
131.59  
131.56  
131.41  
130.78  
129.74  
128.29  
128.17  
125.63  
125.50

21.68  
21.64

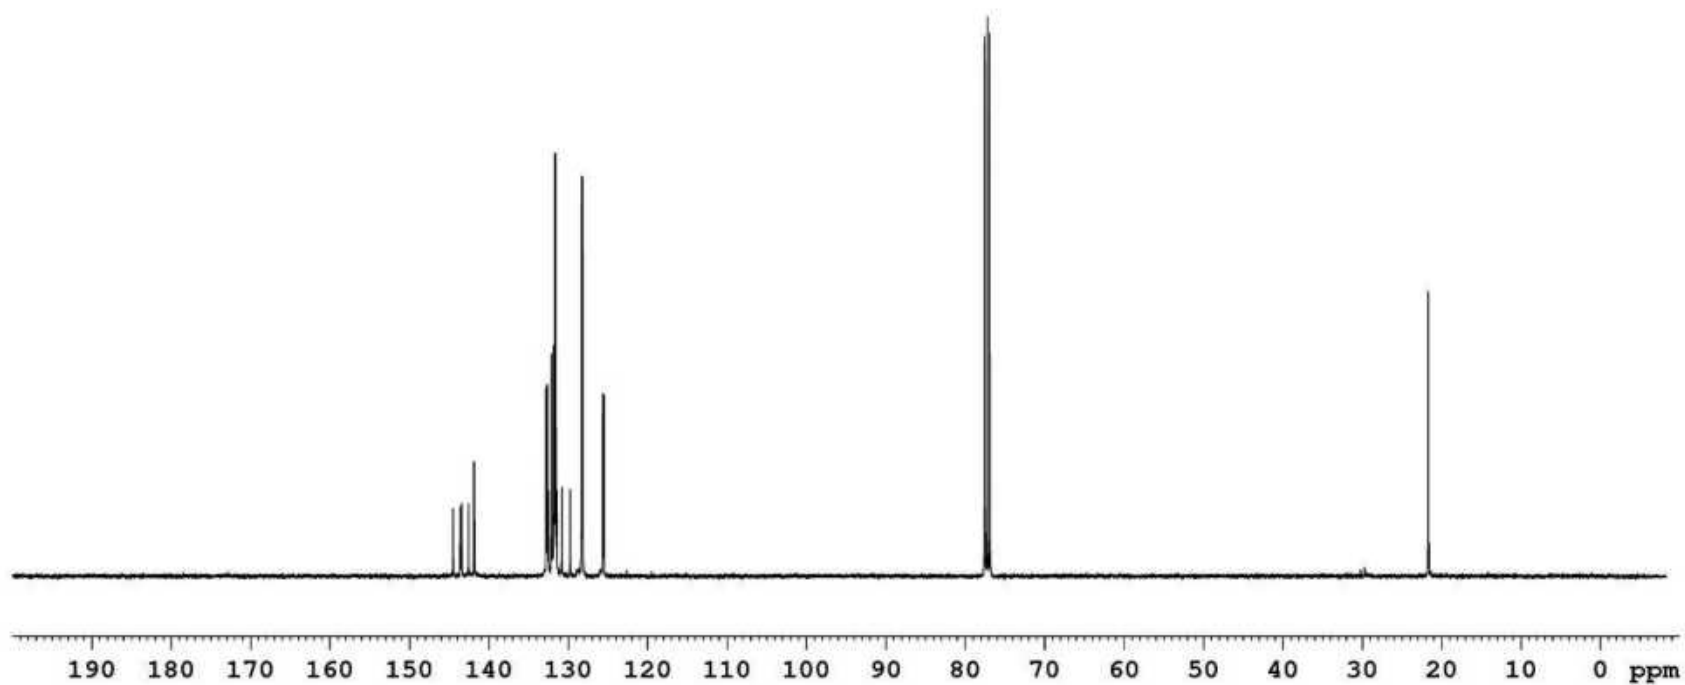



24.63  
24.50  
22.09  
21.97

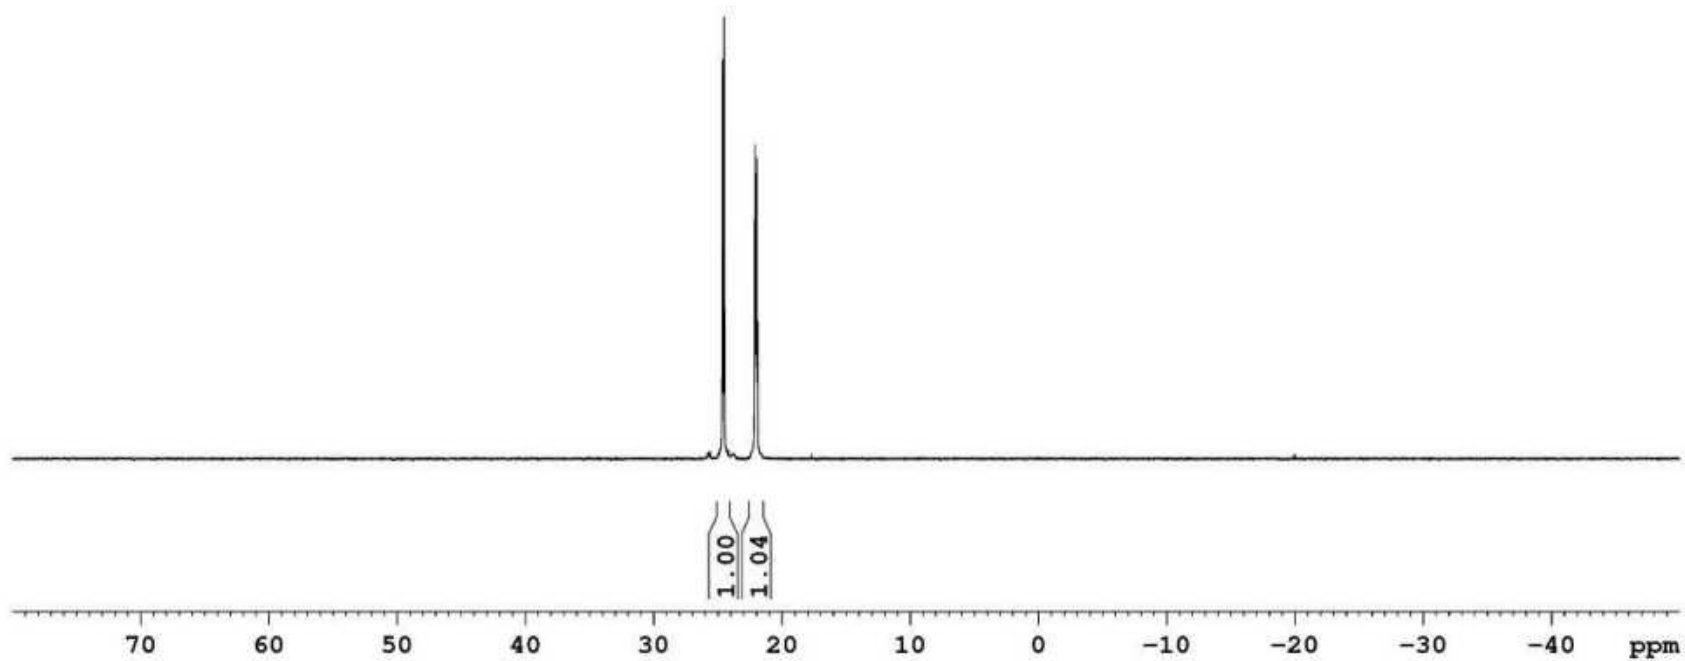

7.77  
7.76  
7.75  
7.74  
7.74  
7.73  
7.72  
7.71  
7.26  
7.17  
7.15  
7.13  
7.13  
7.11  
7.08  
7.07  
7.04  
7.03  
6.99  
6.84  
6.81  
6.80  
6.77  
6.74  
6.71  
6.70  
6.67

2.23  
2.20  
2.18  
2.15  
1.86  
1.83  
1.74  
1.72  
1.67  
1.61  
1.58  
1.41  
1.38  
1.36  
1.30  
1.25  
1.24  
1.23  
1.21  
1.18  
1.09  
1.06  
1.00  
1.00

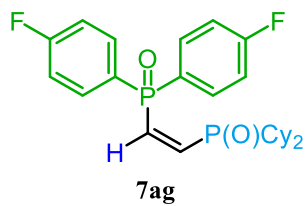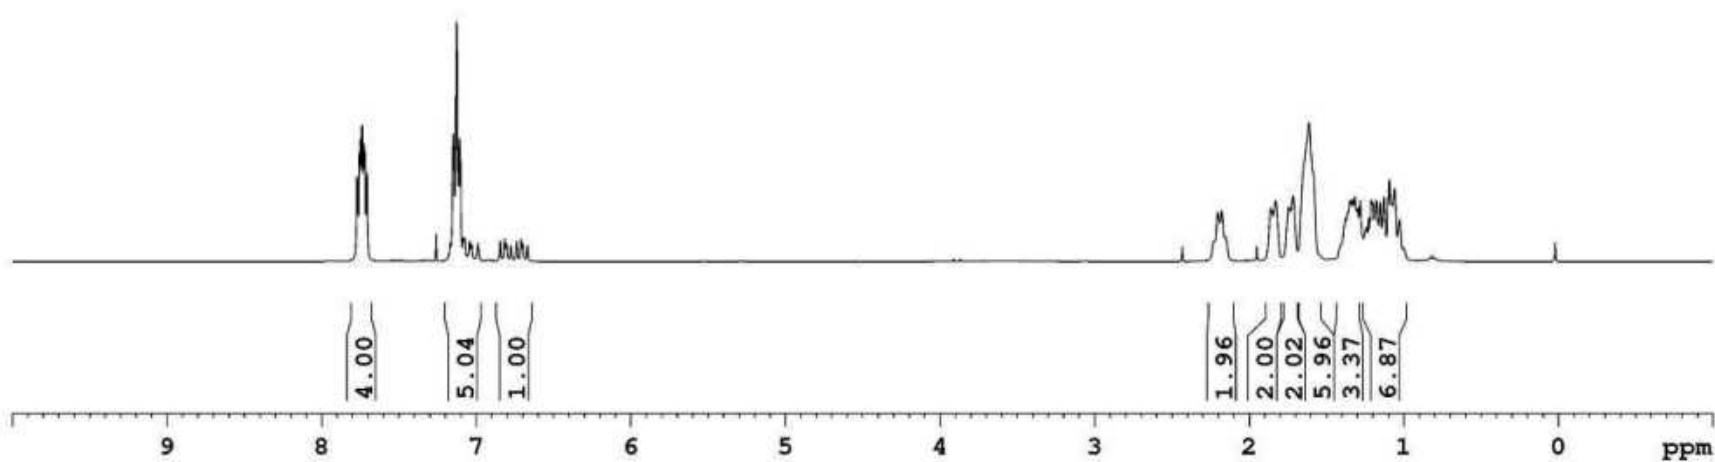

166.39  
166.36  
163.87  
163.83  
145.67  
144.95  
141.12  
140.16  
133.90  
133.82  
133.79  
133.70  
129.04  
129.01  
127.95  
127.92  
116.24  
116.11  
116.03  
115.89

37.69  
37.03  
26.35  
26.26  
26.21  
26.13  
25.71  
25.51  
25.47

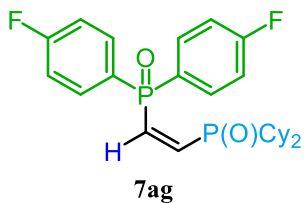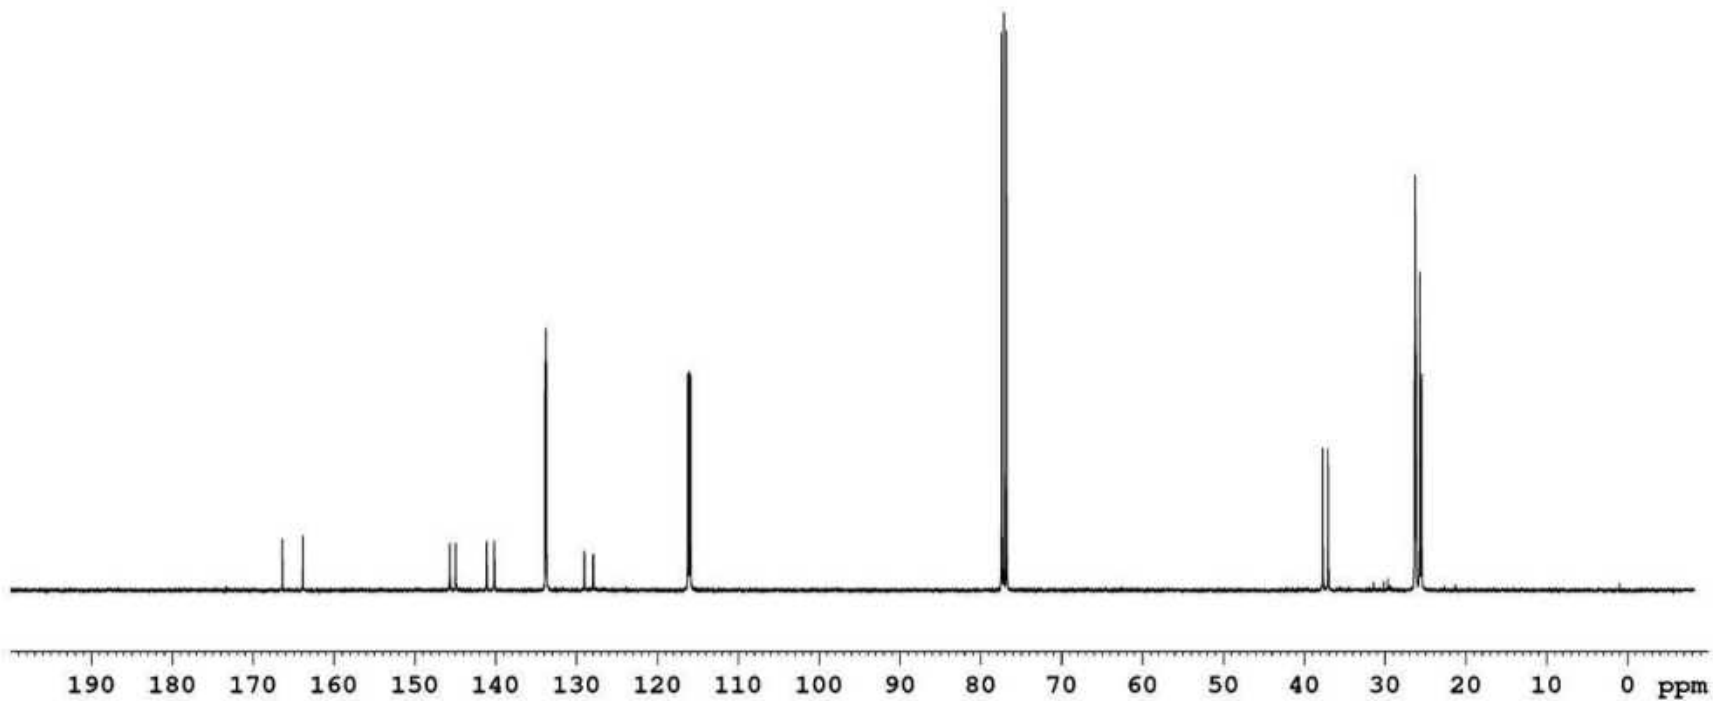

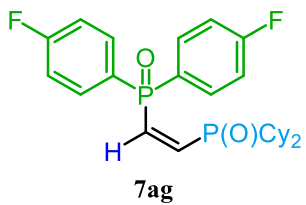

47.55  
47.44

19.19  
19.08

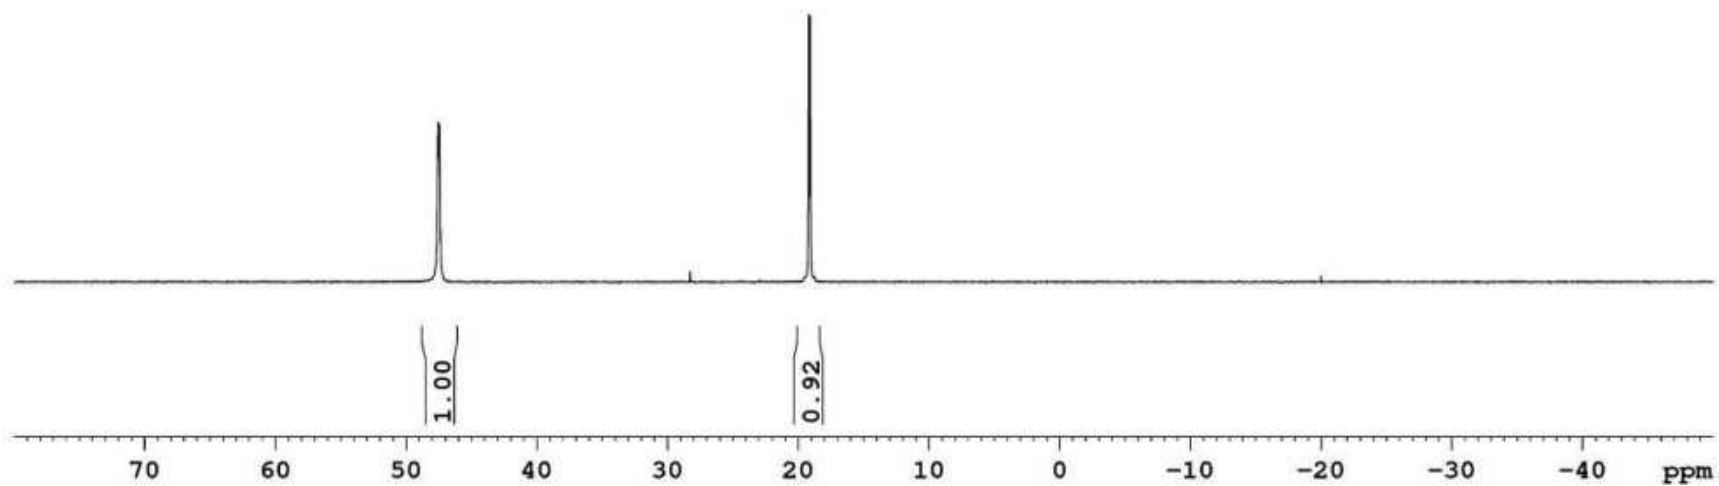

7.88  
7.86  
7.85  
7.83  
7.30  
7.28  
7.26  
7.22  
7.21  
7.17  
7.13  
7.12  
7.08  
6.88  
6.84  
6.80  
6.77  
6.74  
6.70

2.06  
2.04  
2.01  
1.82  
1.79  
1.76  
1.73  
1.69  
1.64  
1.61  
1.32  
1.30  
1.29  
1.26  
1.25  
1.23  
1.22  
1.18  
1.14  
1.11  
1.08  
1.05

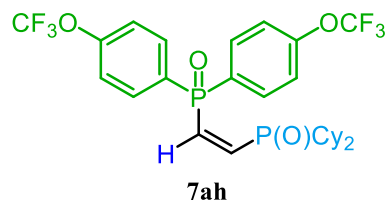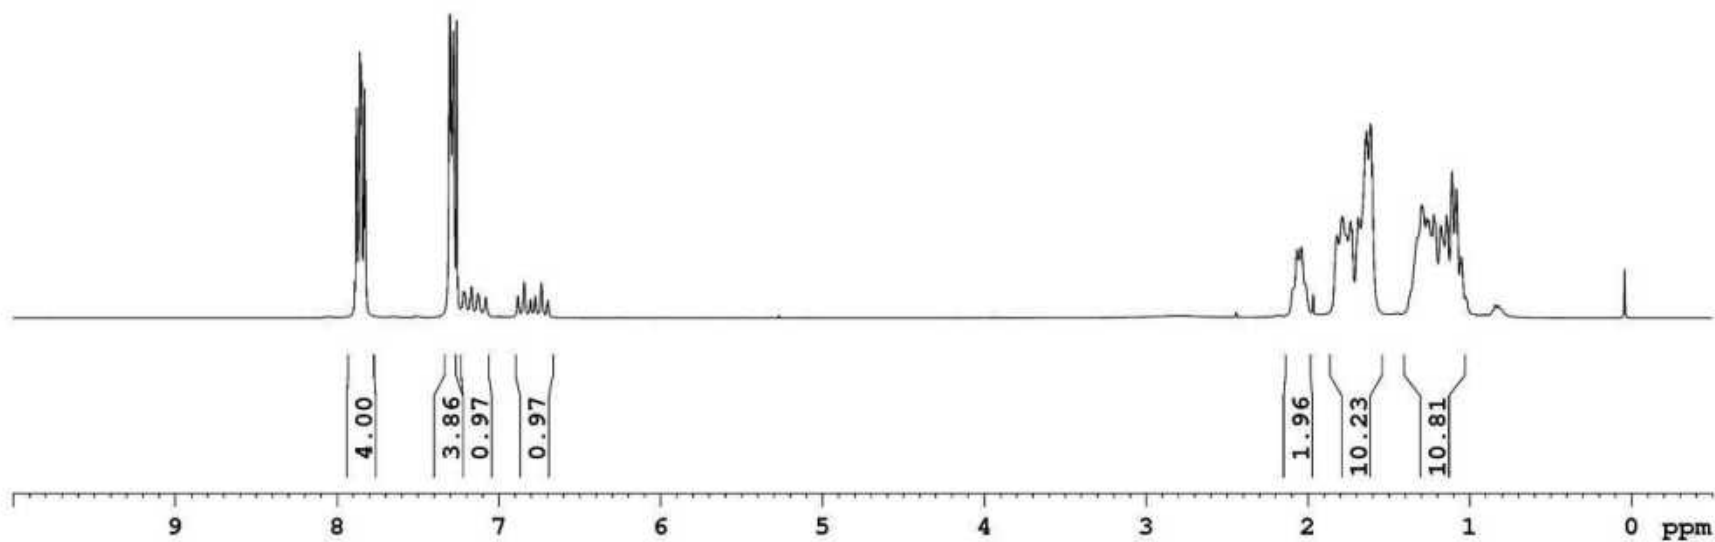

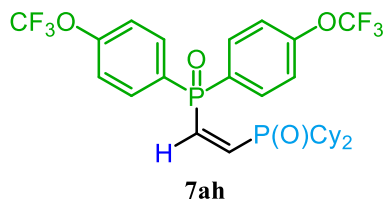

152.04  
145.38  
144.66  
141.94  
140.98  
133.52  
133.41  
131.68  
130.60  
124.12  
121.54  
120.66  
120.53  
118.97  
116.40

37.35  
36.68  
26.33  
26.24  
26.20  
26.11  
25.67  
25.31  
25.28

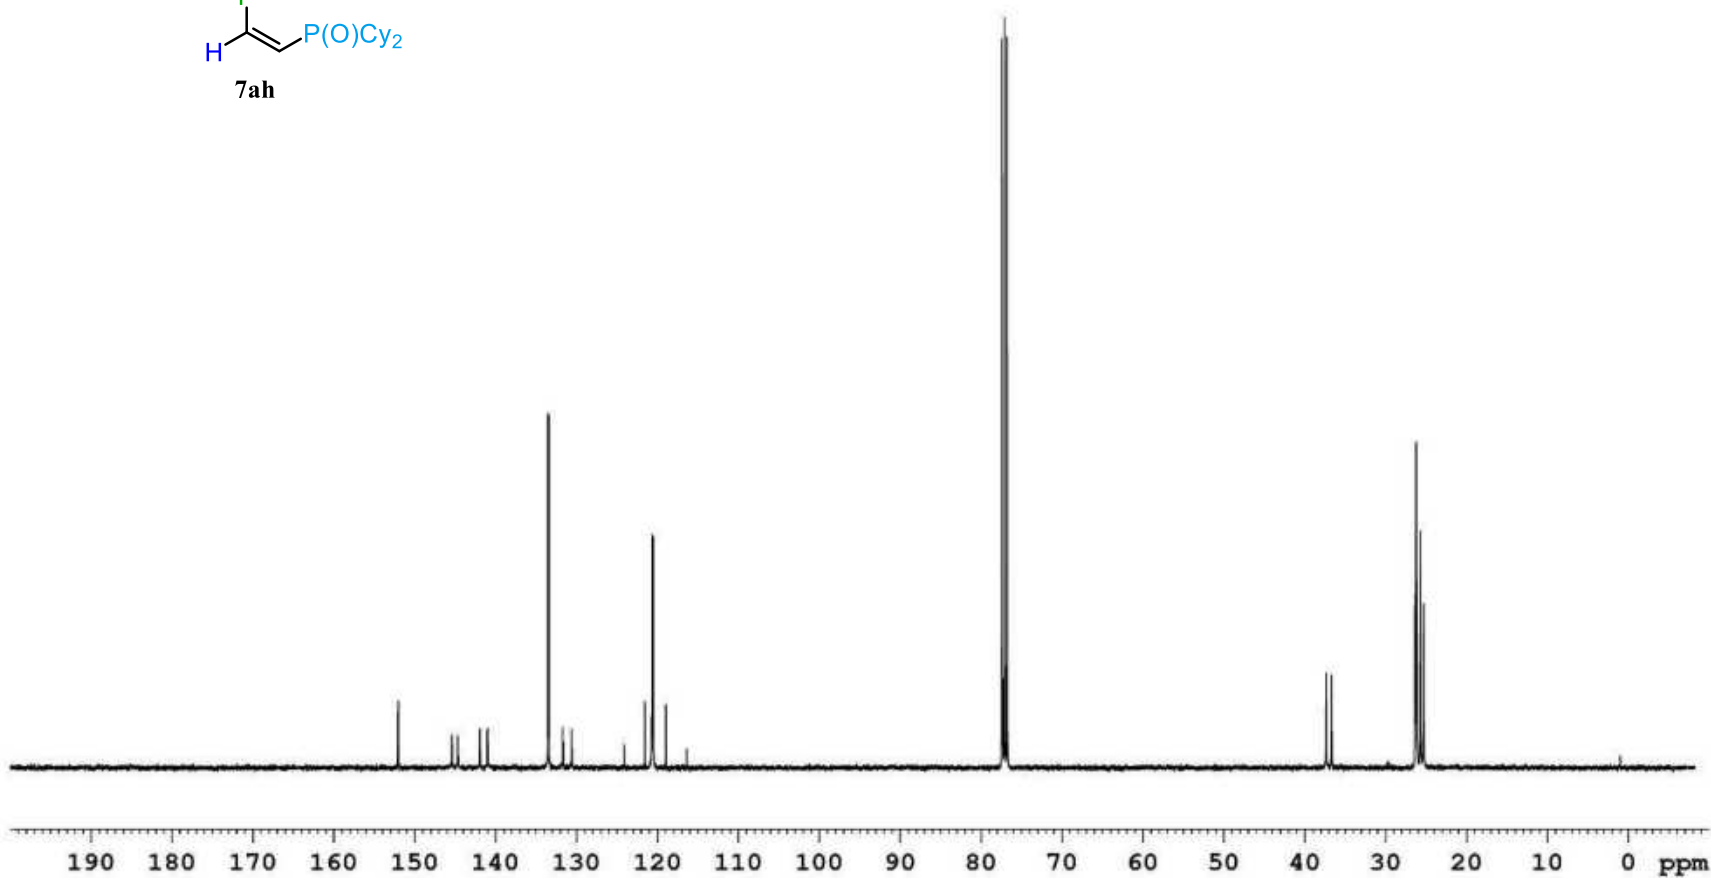



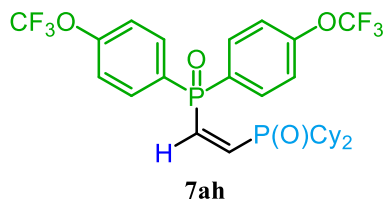

46.37  
46.26

18.90  
18.80

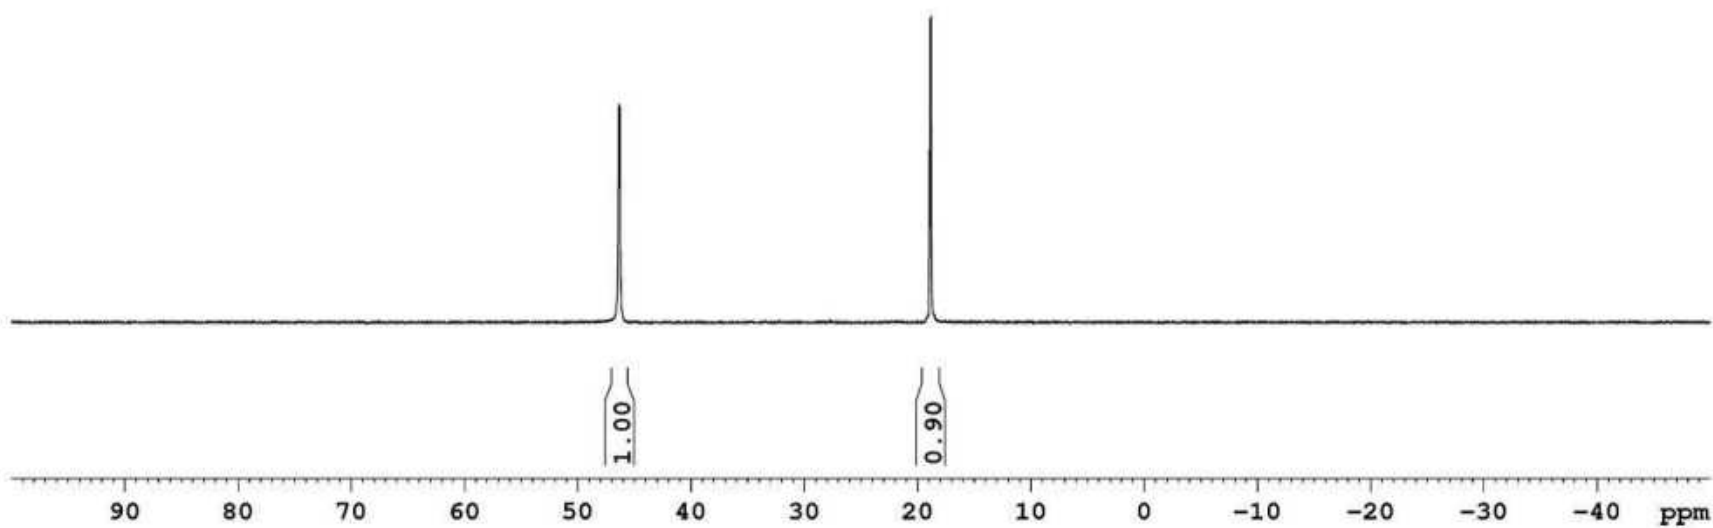

7.61  
7.59  
7.58  
7.56  
7.26  
7.03  
6.99  
6.97  
6.95  
6.94  
6.93  
6.92  
6.90  
6.88  
6.84  
6.77  
6.76  
6.73  
6.71  
6.67  
6.65  
6.63  
6.61  
3.79  
2.55  
2.54  
2.53  
2.52  
2.51  
2.50  
2.48  
2.47  
1.95  
1.92  
1.74  
1.71  
1.71  
1.67  
1.59  
1.56  
1.49  
1.44  
1.43  
1.39  
1.38  
1.34  
1.33  
1.33  
1.32  
1.17  
1.14  
1.14  
1.11  
1.08  
1.03  
1.01  
1.00

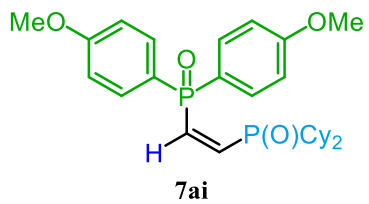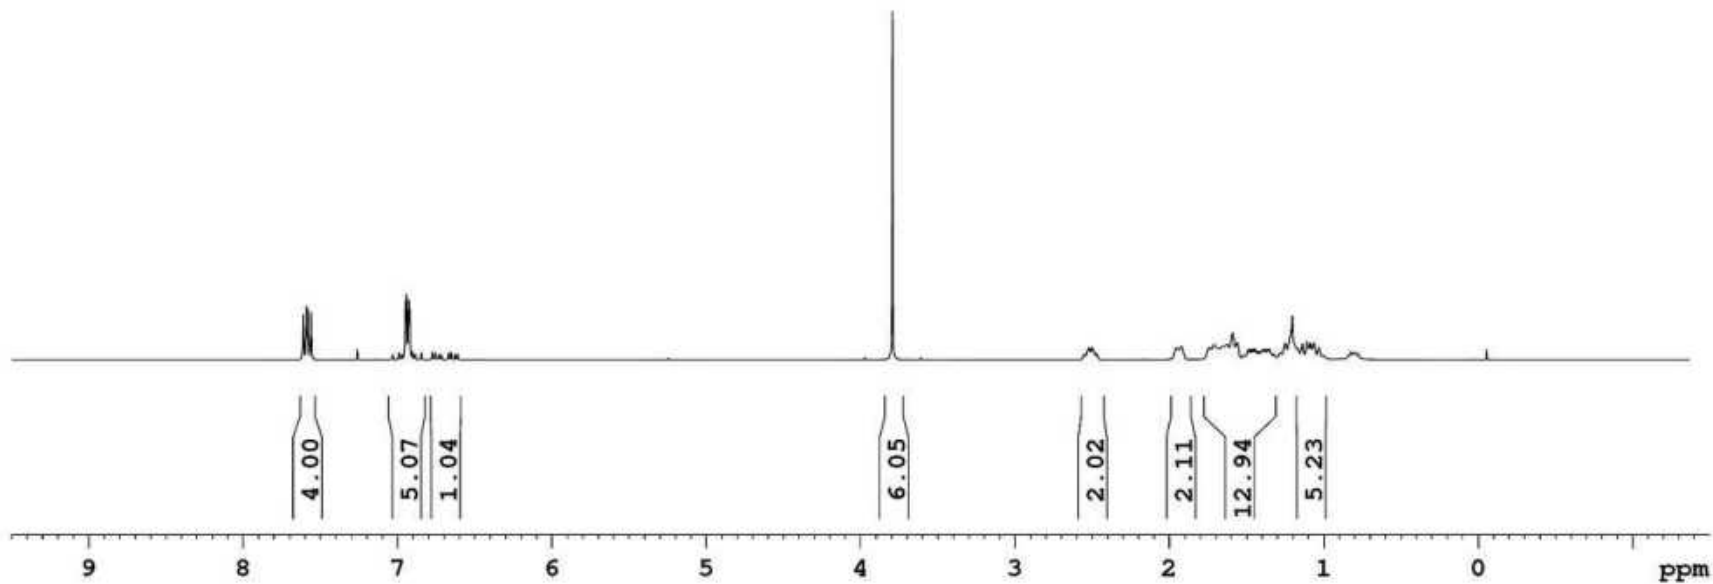

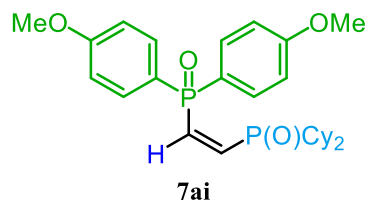

162.57  
162.55

145.87  
145.14  
140.02  
139.08  
133.00  
132.89  
124.41  
123.29  
114.37  
114.24

55.39  
38.30  
37.64  
26.49  
26.45  
26.37  
26.32  
26.23  
26.18  
25.90  
25.86  
25.82

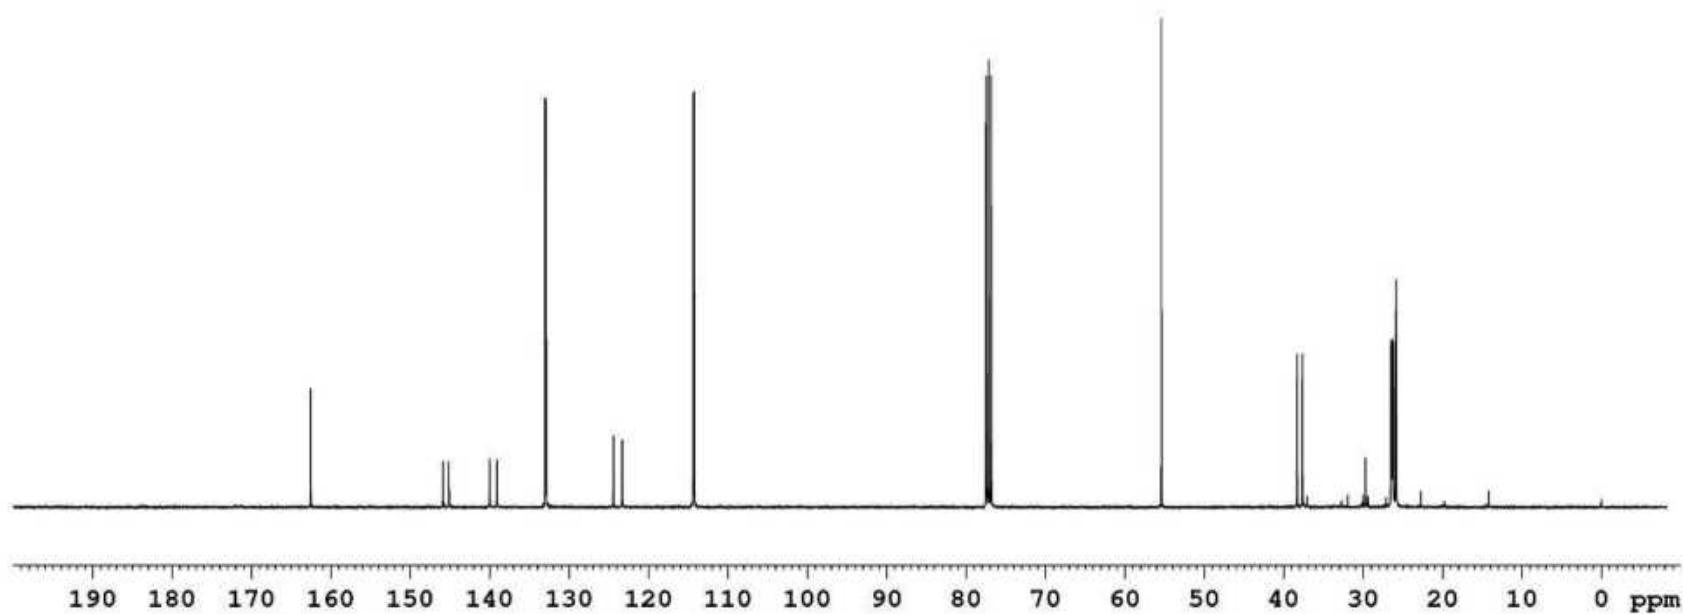



49.43  
49.33

19.59  
19.49

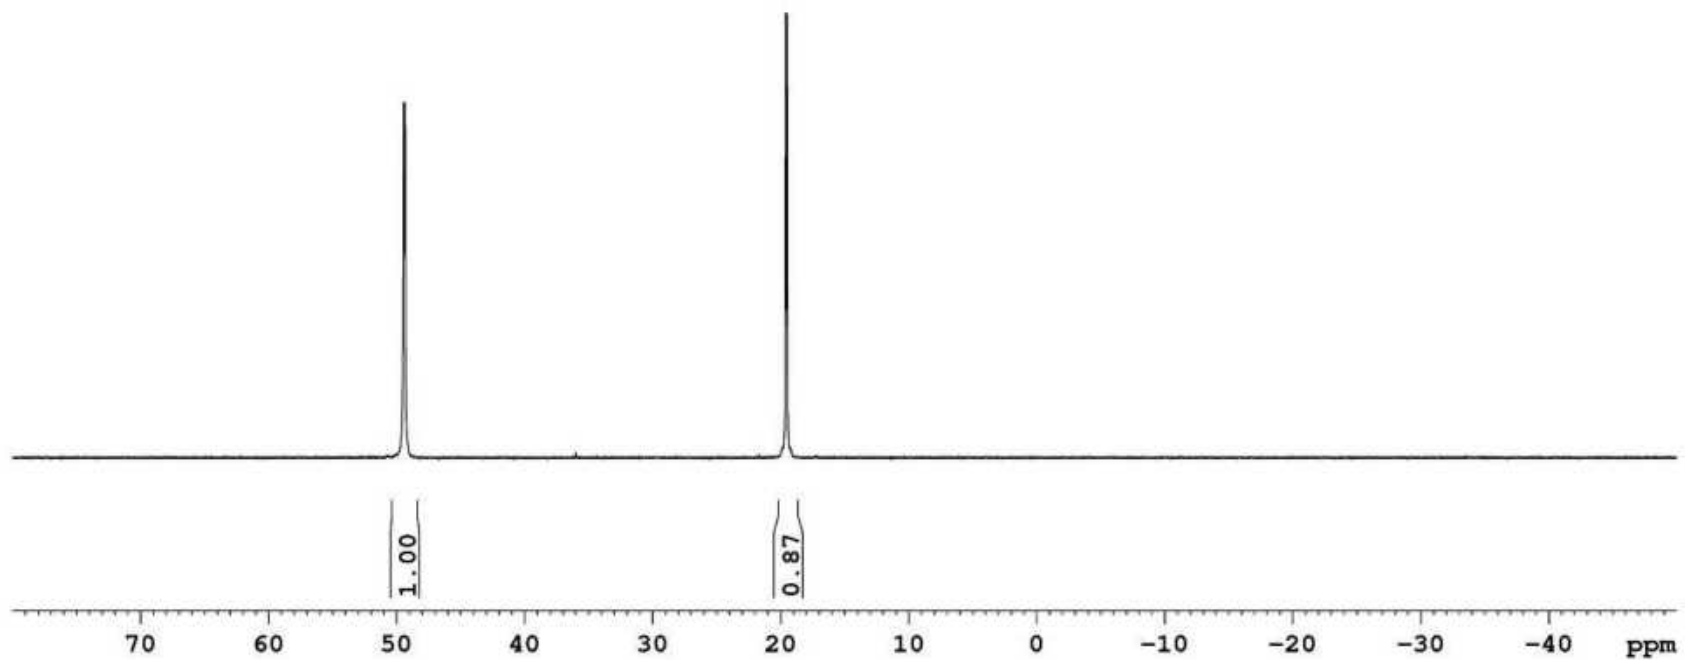

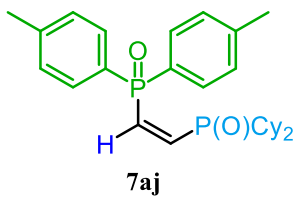

7.57  
7.55  
7.54  
7.52  
7.26  
7.26  
7.24  
7.24  
7.07  
7.03  
6.89  
6.84  
6.72  
6.69  
6.68

2.58  
2.57  
2.55  
2.54  
2.53  
2.50  
2.36  
1.97  
1.97  
1.94  
1.75  
1.72  
1.69  
1.61  
1.59  
1.57  
1.50  
1.49  
1.43  
1.36  
1.21  
1.18  
1.14  
1.06  
1.03

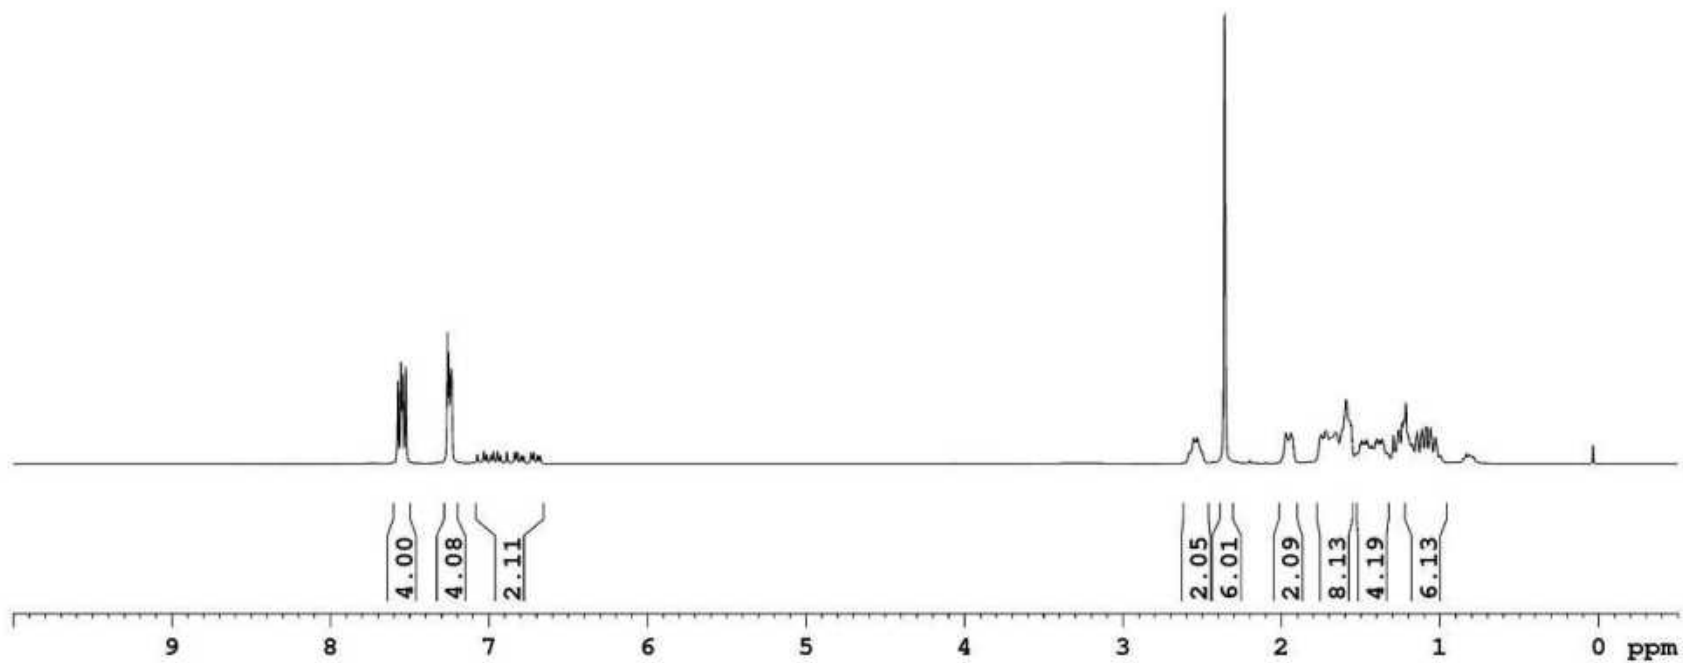



146.41  
145.68  
142.72  
142.70  
139.60  
138.67  
131.07  
130.97  
129.84  
129.58  
129.45  
128.76

38.26  
37.61  
26.46  
26.43  
26.29  
26.16  
25.88  
25.85  
25.79  
21.61

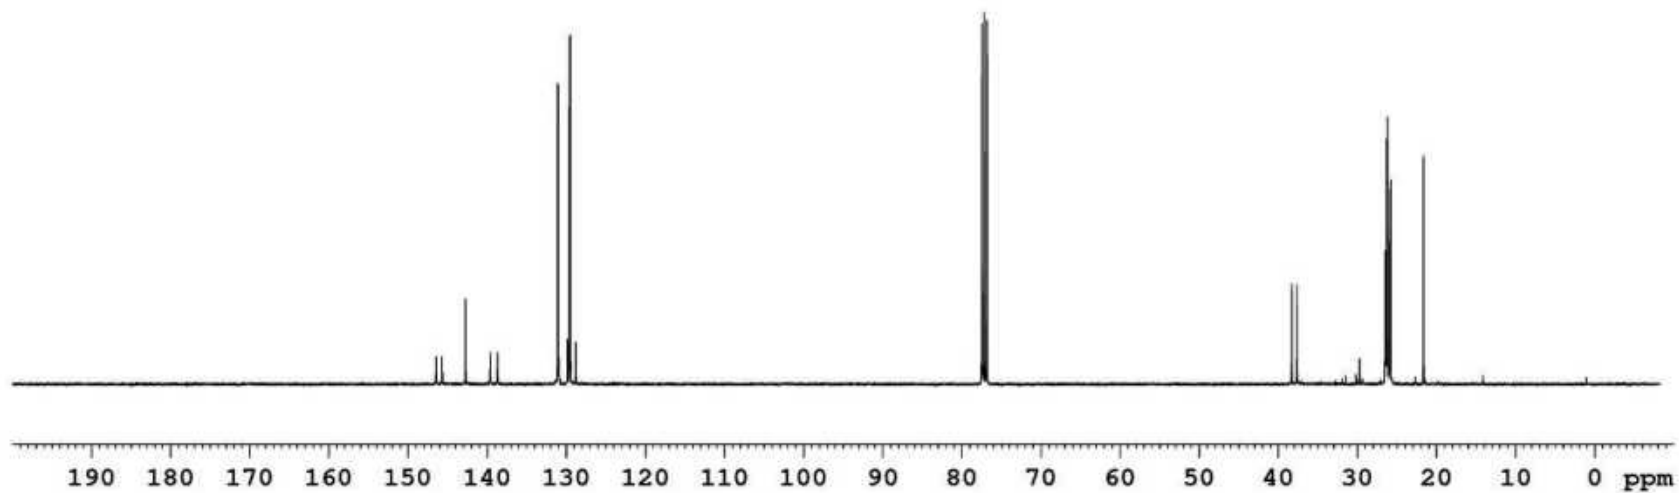



— 50.19

< 19.93  
19.83

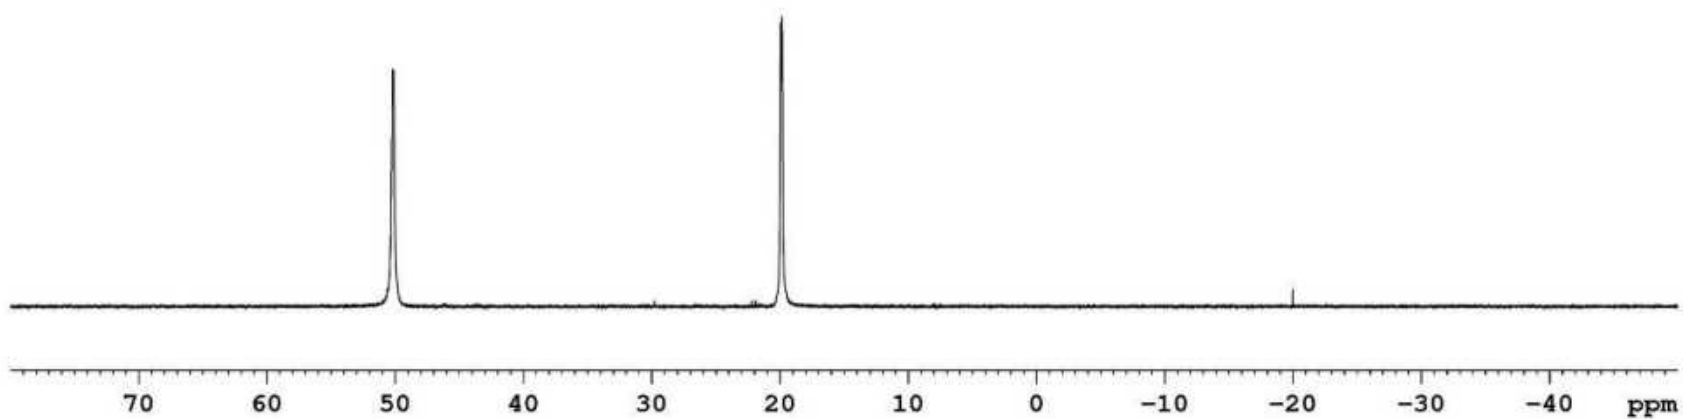

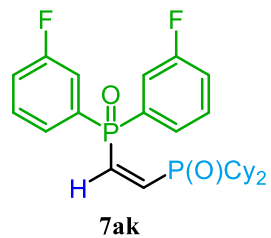

7.53  
7.51  
7.48  
7.42  
7.41  
7.26  
7.20  
7.18  
7.09  
7.07  
7.03  
6.93  
6.90  
6.89  
6.78  
6.75

2.22  
2.18  
2.16  
2.13  
1.88  
1.85  
1.61  
1.58  
1.42  
1.35  
1.34  
1.31  
1.24  
1.23  
1.07  
1.04  
1.02

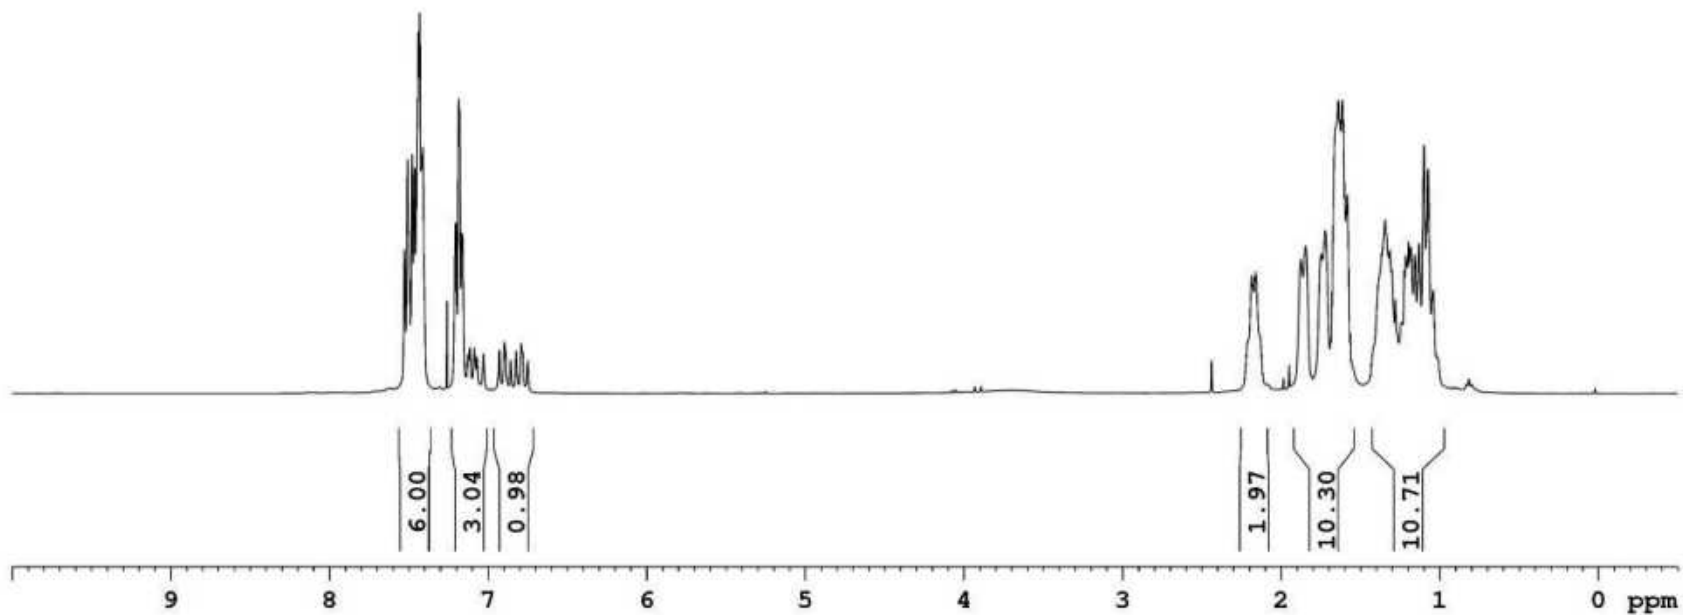



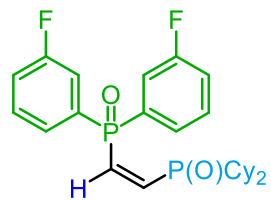

7ak

163.84  
163.66  
161.34  
161.17  
146.63  
145.92  
140.41  
139.45  
135.75  
134.70  
130.89  
130.81  
130.74  
130.67  
126.82  
126.79  
126.73  
126.70  
119.49  
119.29  
118.15  
118.04  
117.93  
117.82

37.52  
36.86  
26.32  
26.26  
26.19  
26.13  
25.69  
25.47  
25.44

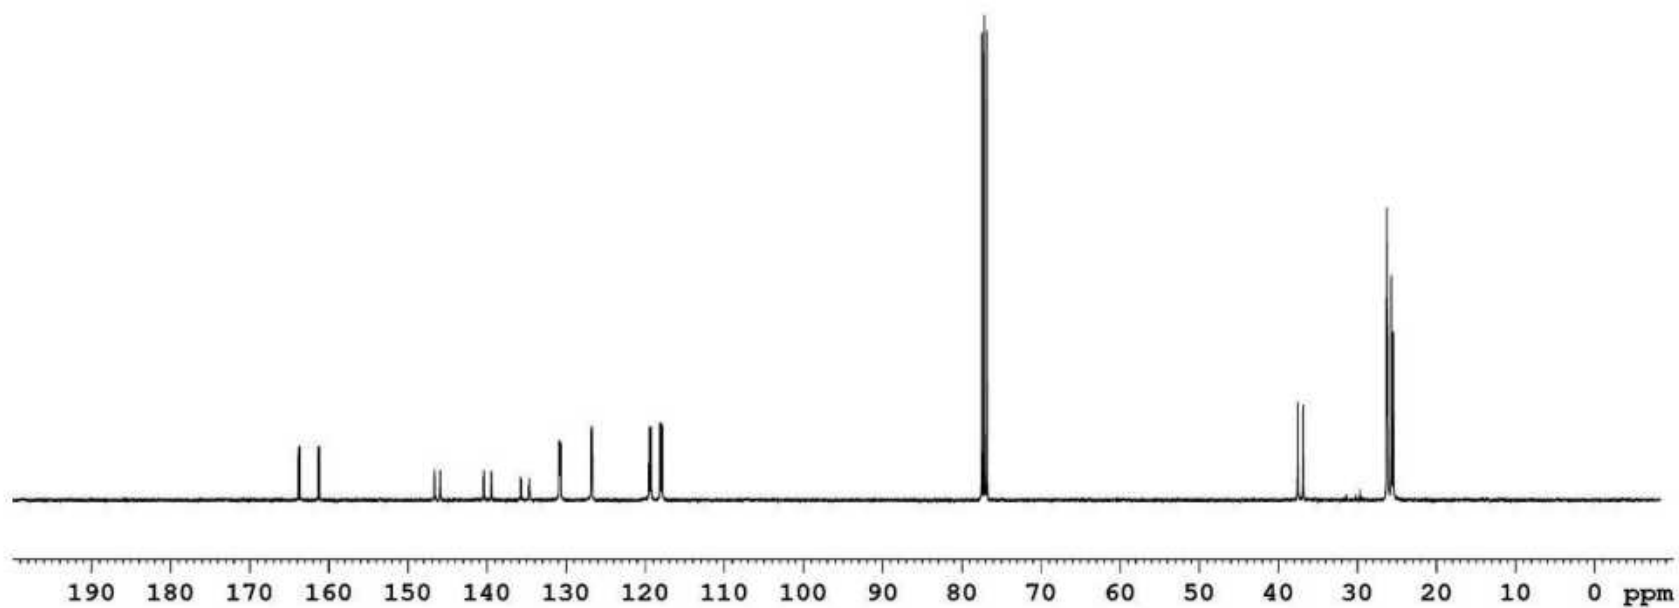



47.62  
47.52

17.80  
17.70

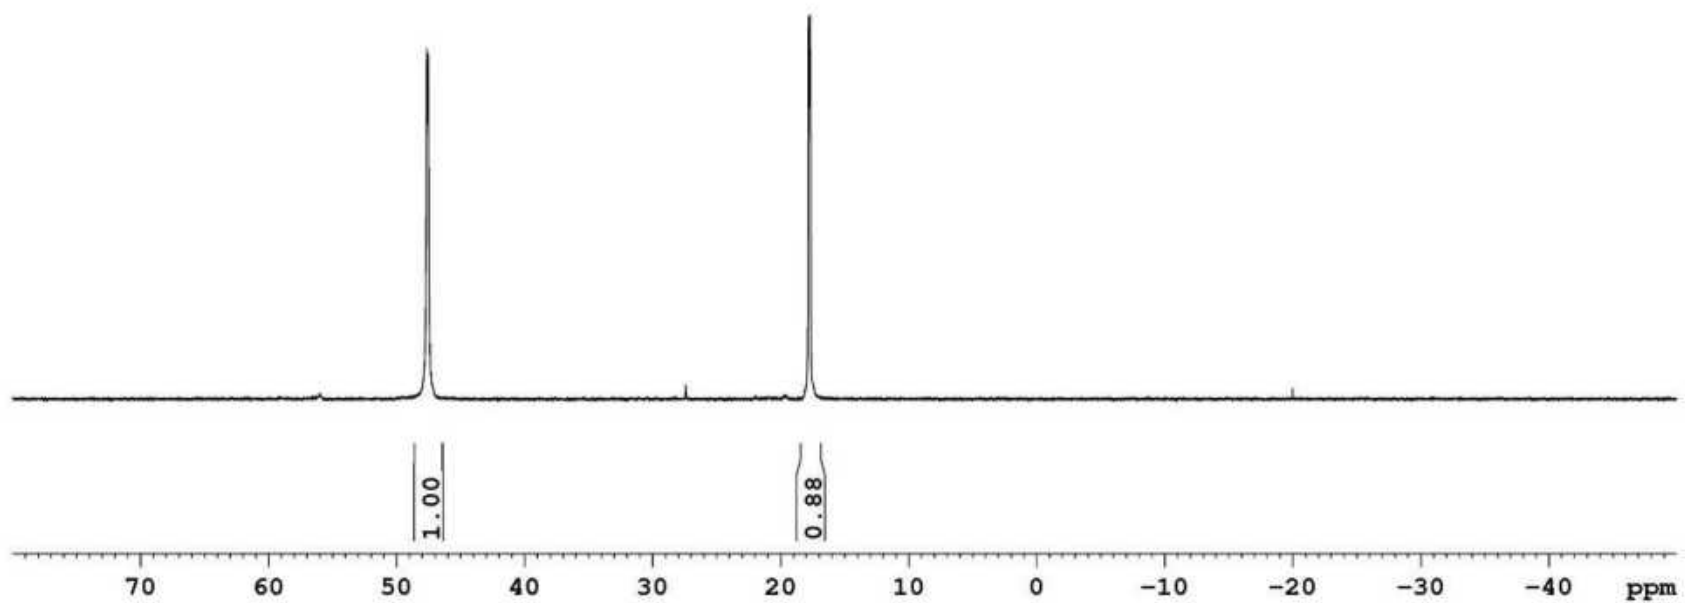

7.76  
7.72  
7.65  
7.63  
7.62  
7.60  
7.48  
7.46  
7.41  
7.41  
7.40  
7.39  
7.38  
7.37  
7.26  
7.25  
7.21  
7.19  
7.15  
7.12  
7.11  
7.07  
6.94  
6.90  
6.86  
6.83  
6.80  
6.76

2.13  
2.09  
2.07  
2.04  
1.86  
1.83  
1.74  
1.70  
1.67  
1.63  
1.39  
1.33  
1.31  
1.29  
1.20  
1.19  
1.15  
1.13  
1.11  
1.06

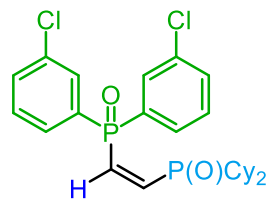

7al

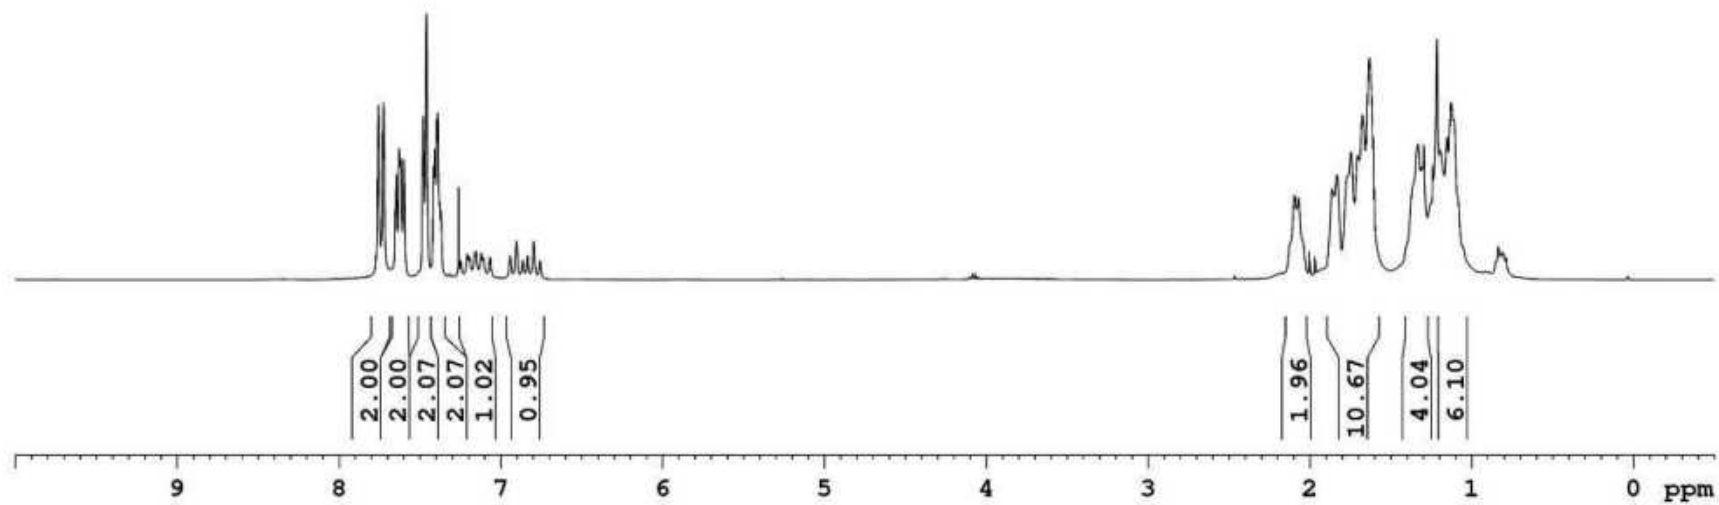

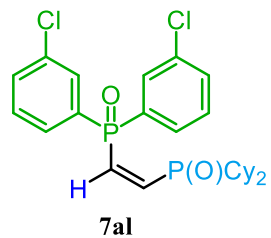

146.01  
145.30  
141.36  
140.41  
135.47  
135.14  
134.98  
134.42  
132.30  
131.03  
130.92  
130.26  
130.13  
129.25  
129.16

37.27  
36.61  
26.37  
26.30  
26.24  
26.18  
25.71  
25.39  
25.36

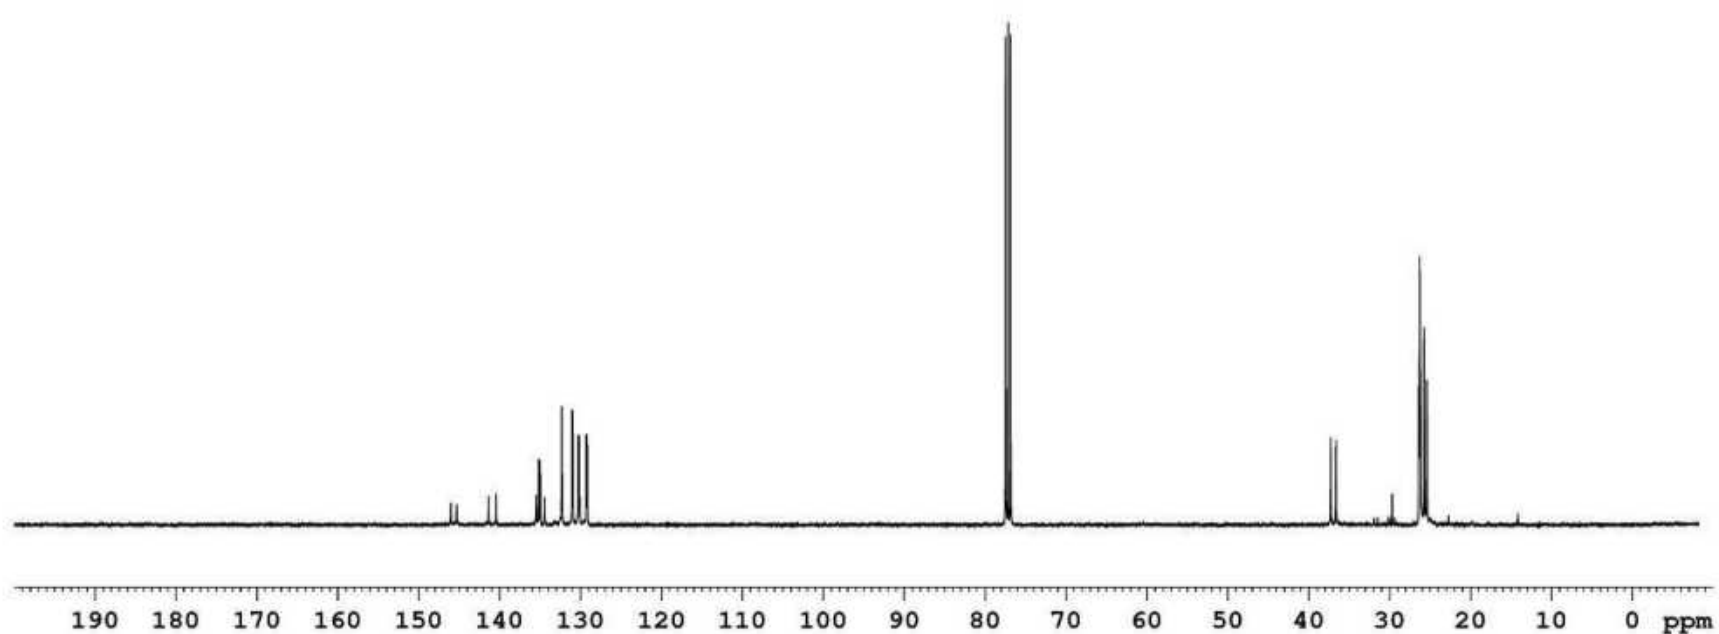

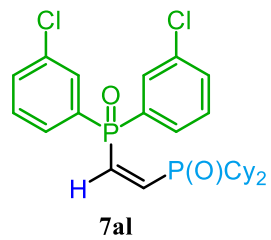

47.10  
47.01

18.40  
18.30

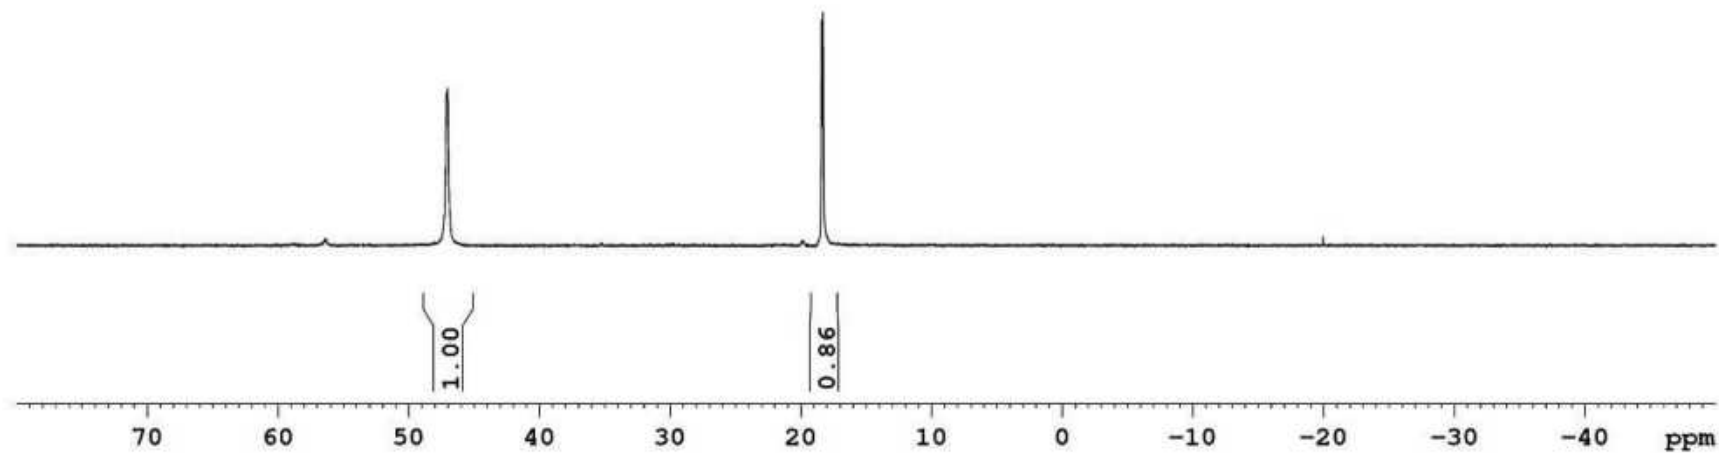

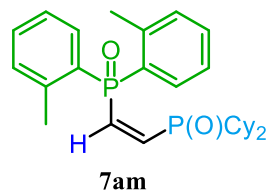

7.56  
7.54  
7.53  
7.51  
7.41  
7.39  
7.38  
7.26  
7.24  
7.22  
7.21  
7.19  
7.06  
7.02  
6.95  
6.94  
6.91  
6.90  
6.82  
6.78

2.58  
2.51  
2.31  
1.97  
1.95  
1.94  
1.70  
1.68  
1.57  
1.41  
1.39  
1.37  
1.17  
1.14  
1.12  
1.08  
1.05  
0.95  
0.92  
0.89

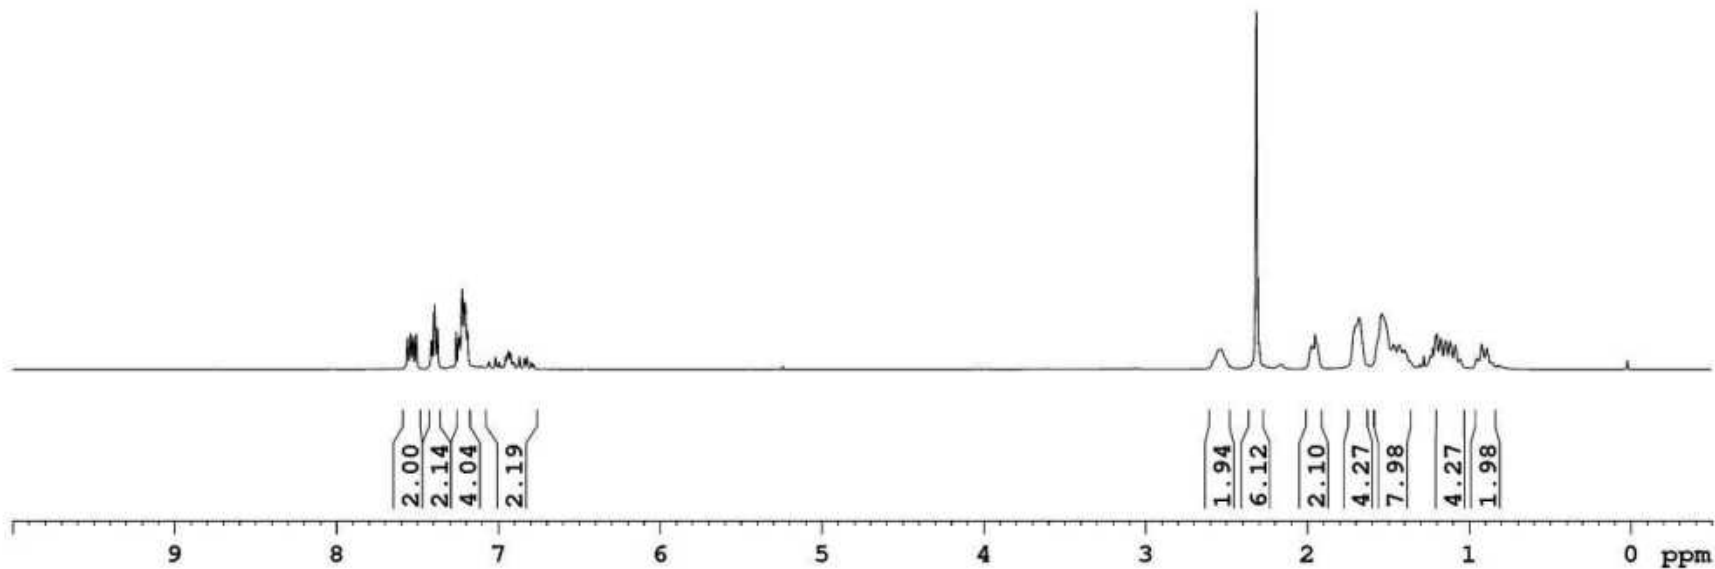



148.48  
147.76  
141.55  
141.47  
139.35  
138.42  
132.35  
132.32  
132.23  
132.12  
132.03  
131.92  
131.23  
130.21  
126.01  
125.88

38.33  
37.67  
26.44  
26.41  
26.21  
26.13  
26.08  
26.00  
25.95  
25.91  
25.72  
21.42  
21.38

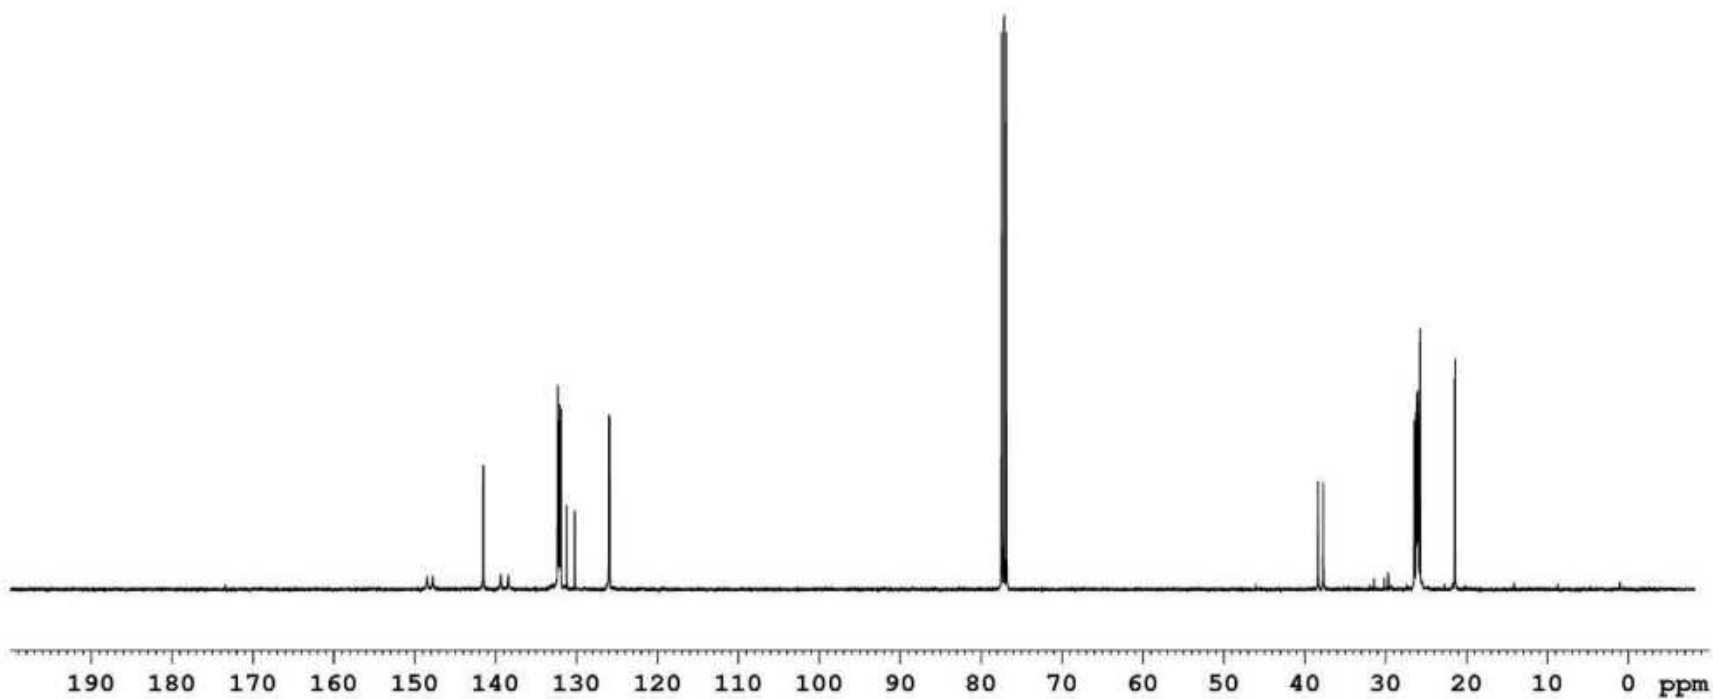

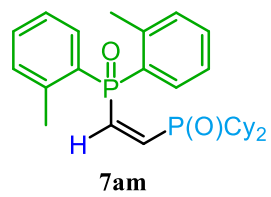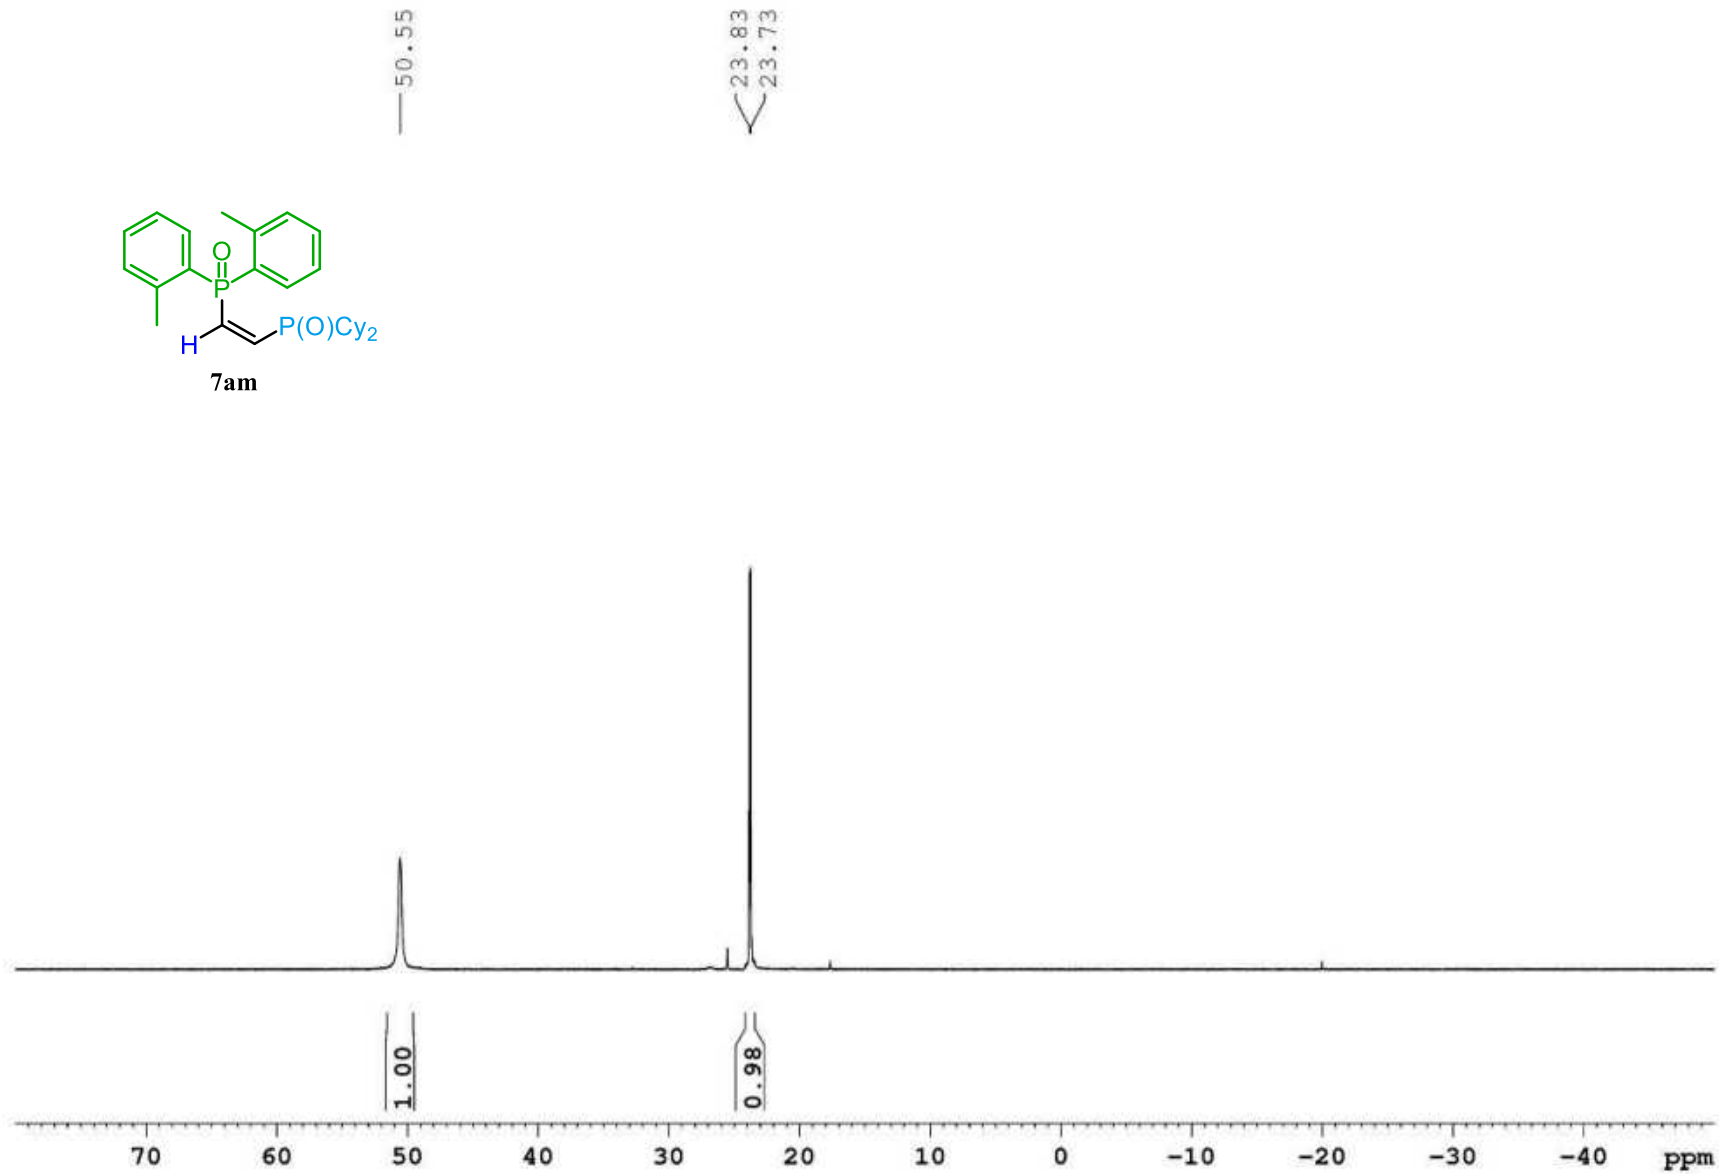



7.48  
7.47  
7.45  
7.41  
7.40  
7.39  
7.38  
7.26  
7.20  
7.20  
7.18  
7.16  
7.16  
7.16  
7.06  
7.02  
6.99  
6.95  
6.87  
6.80

3.54  
3.50  
3.46  
2.64  
2.60  
2.55  
1.98  
1.96  
1.95  
1.67  
1.66  
1.56  
1.55  
1.51  
1.48  
1.44  
1.42  
1.22  
1.16  
1.13  
1.13  
1.10  
1.08  
1.03  
1.01  
0.83  
0.82  
0.80  
0.76  
0.74

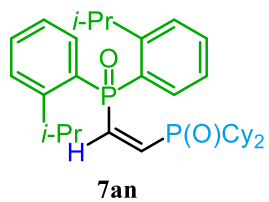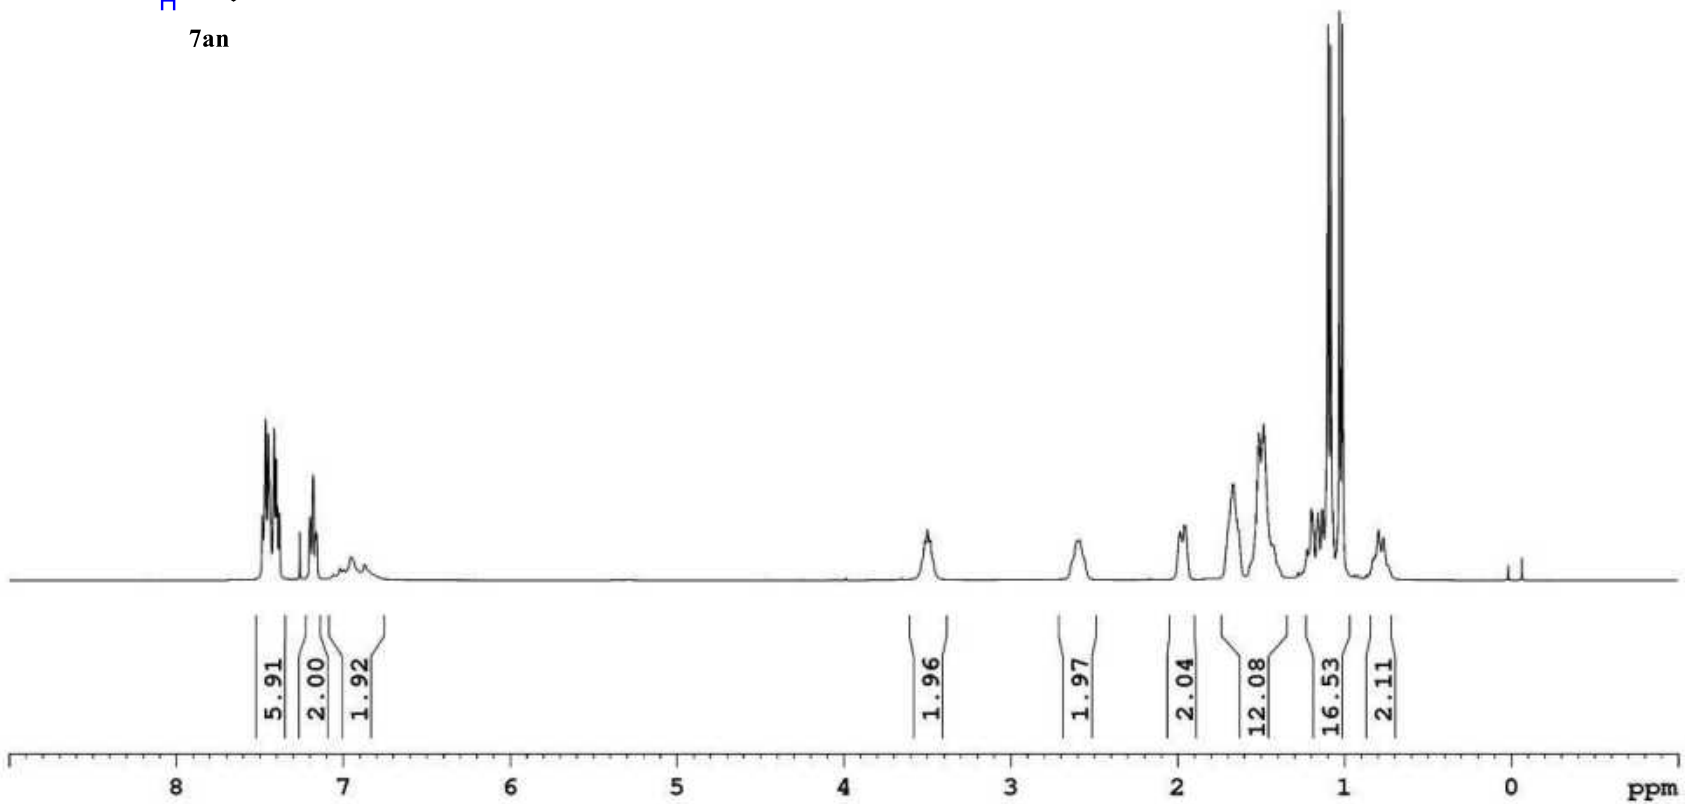

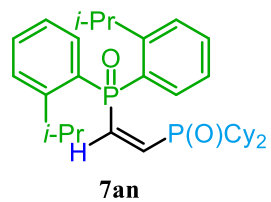

153.33  
153.24  
148.65  
147.97  
140.34  
139.42  
132.63  
132.21  
132.09  
130.94  
129.91  
127.47  
127.36  
125.87  
125.75

38.13  
37.48  
31.41  
31.36  
26.38  
26.35  
26.16  
26.03  
25.97  
25.93  
25.90  
25.68  
24.18  
24.00

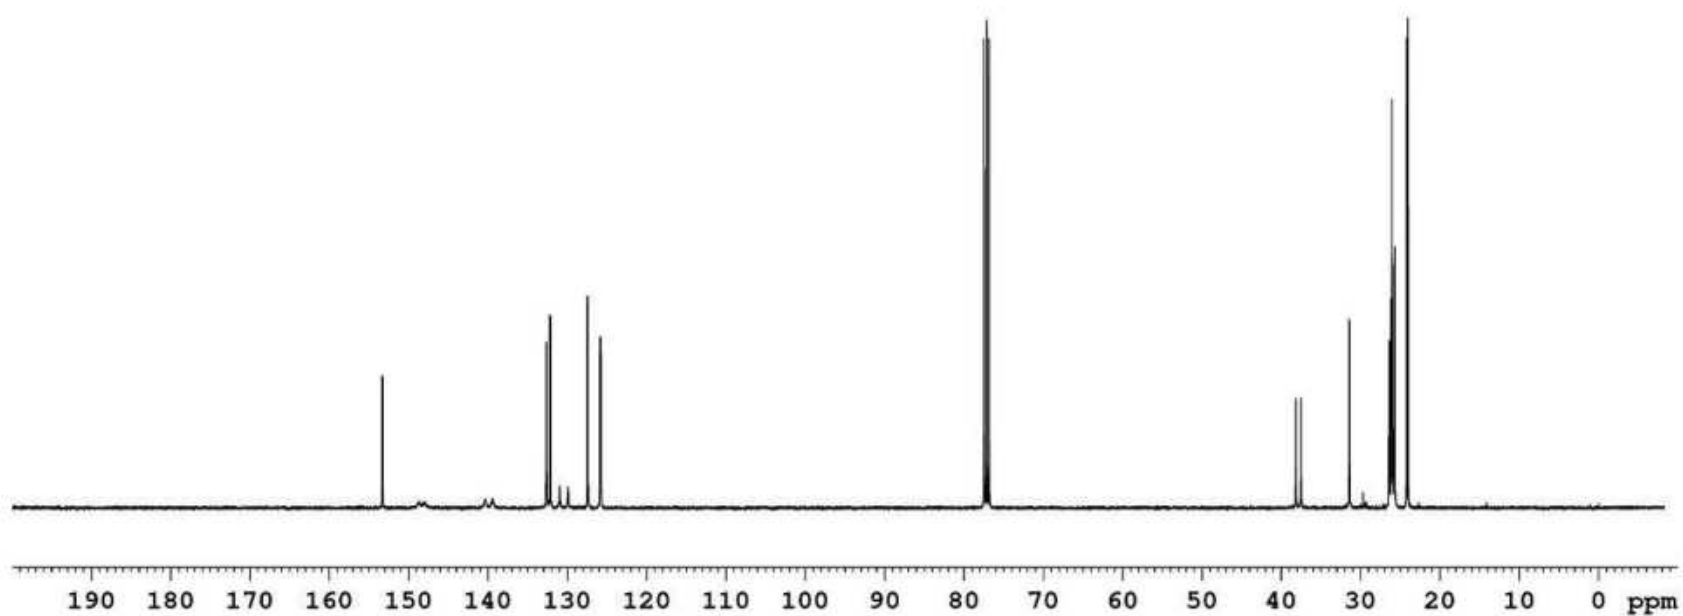

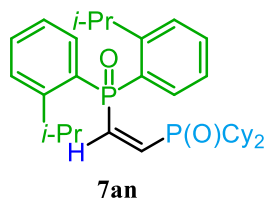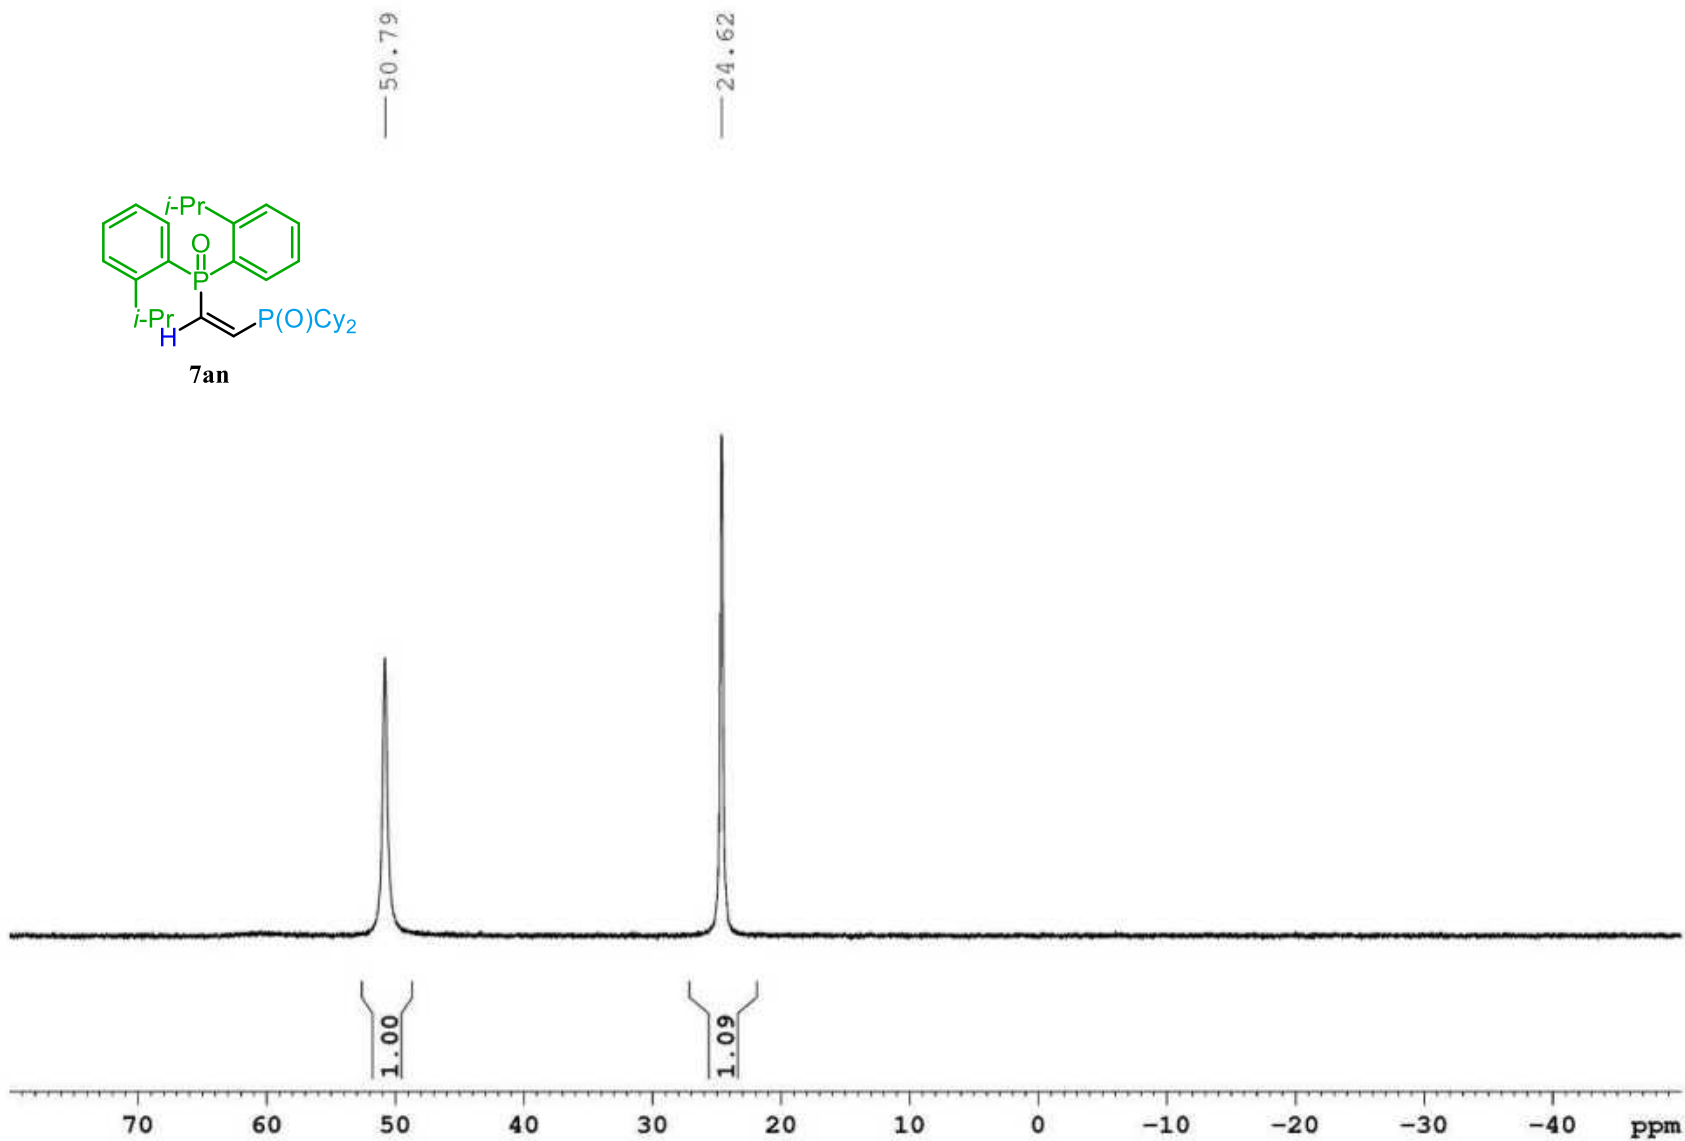

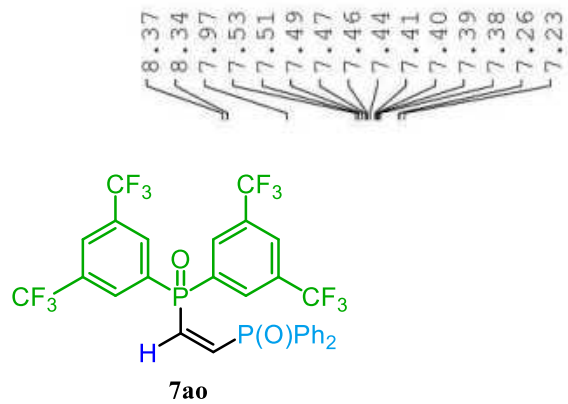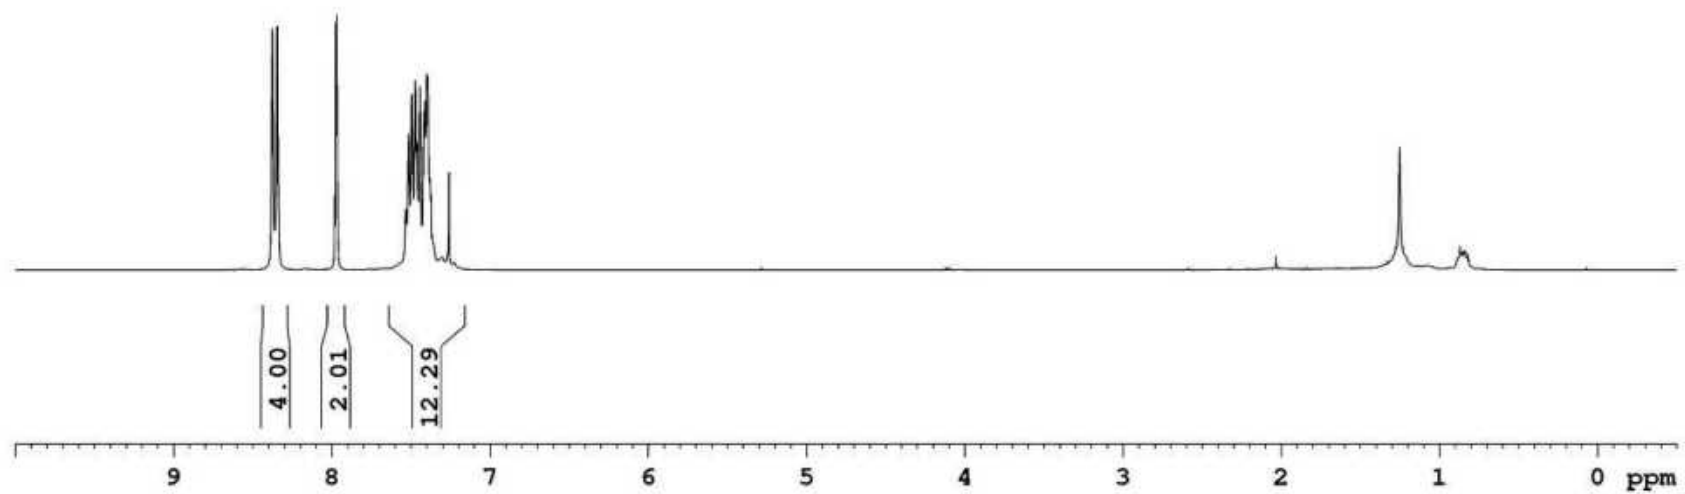

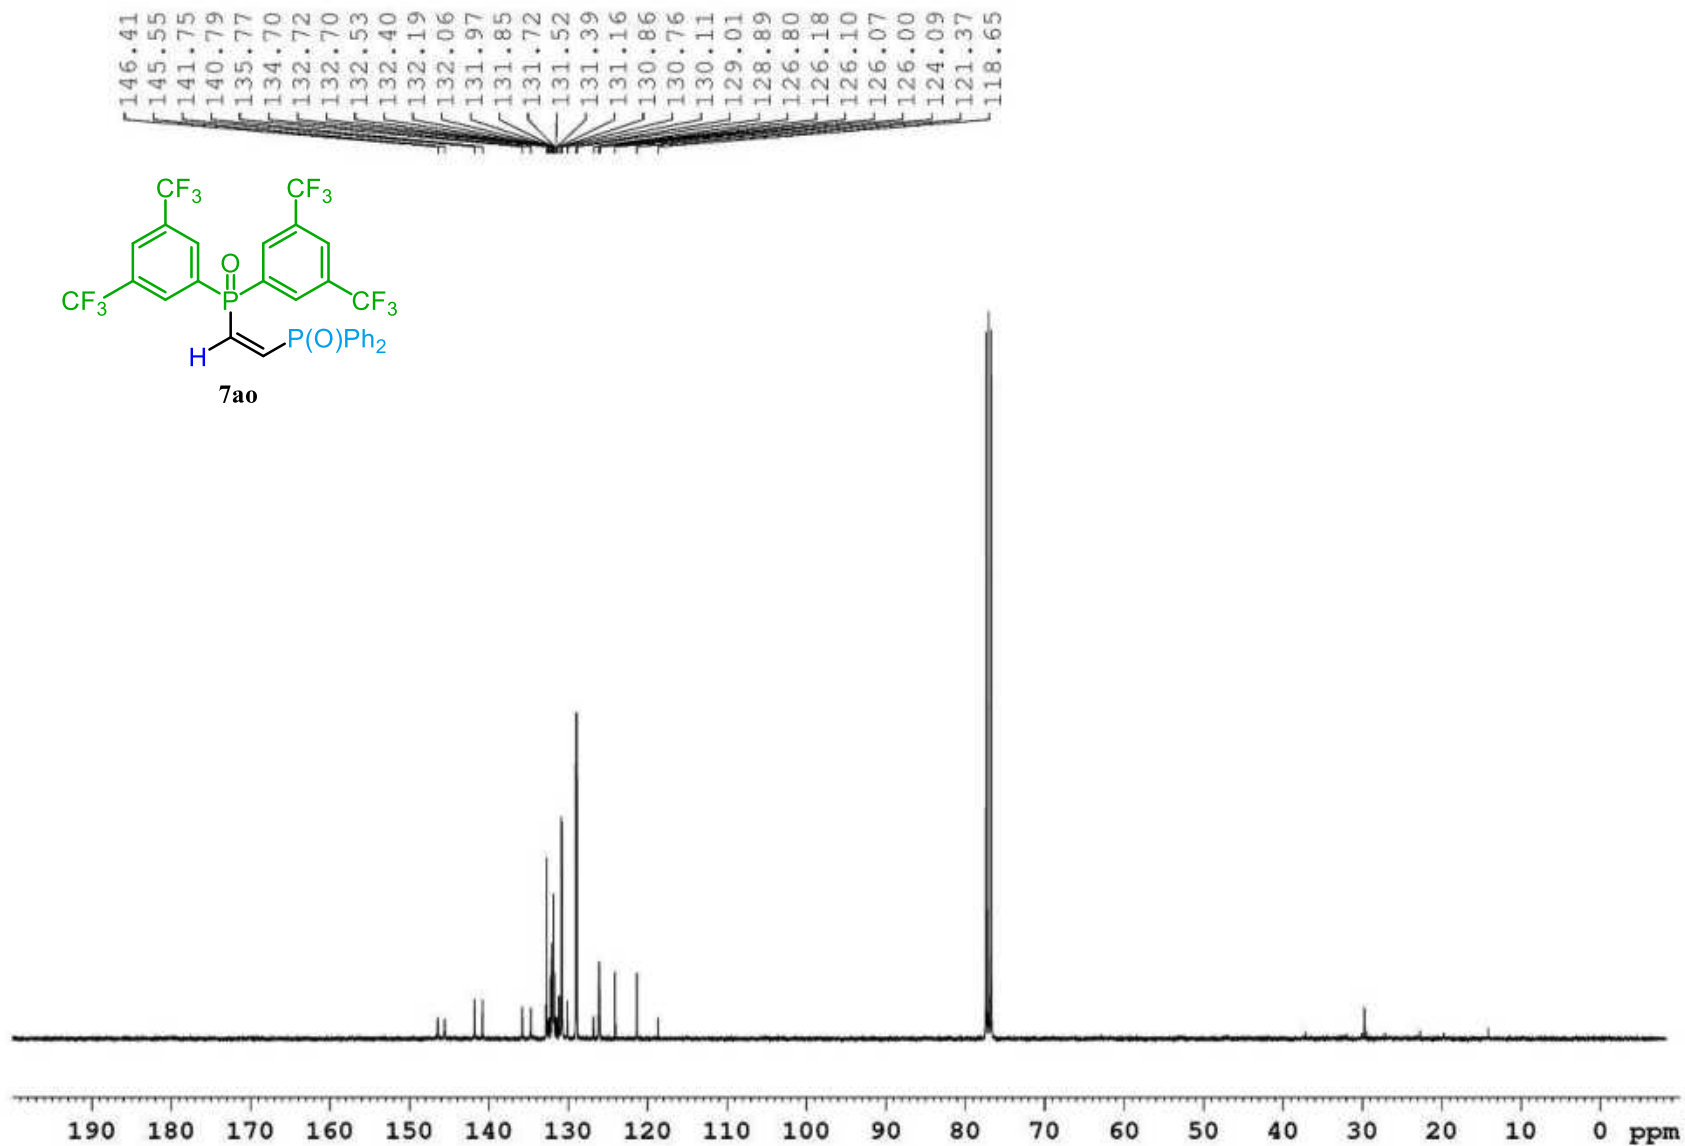

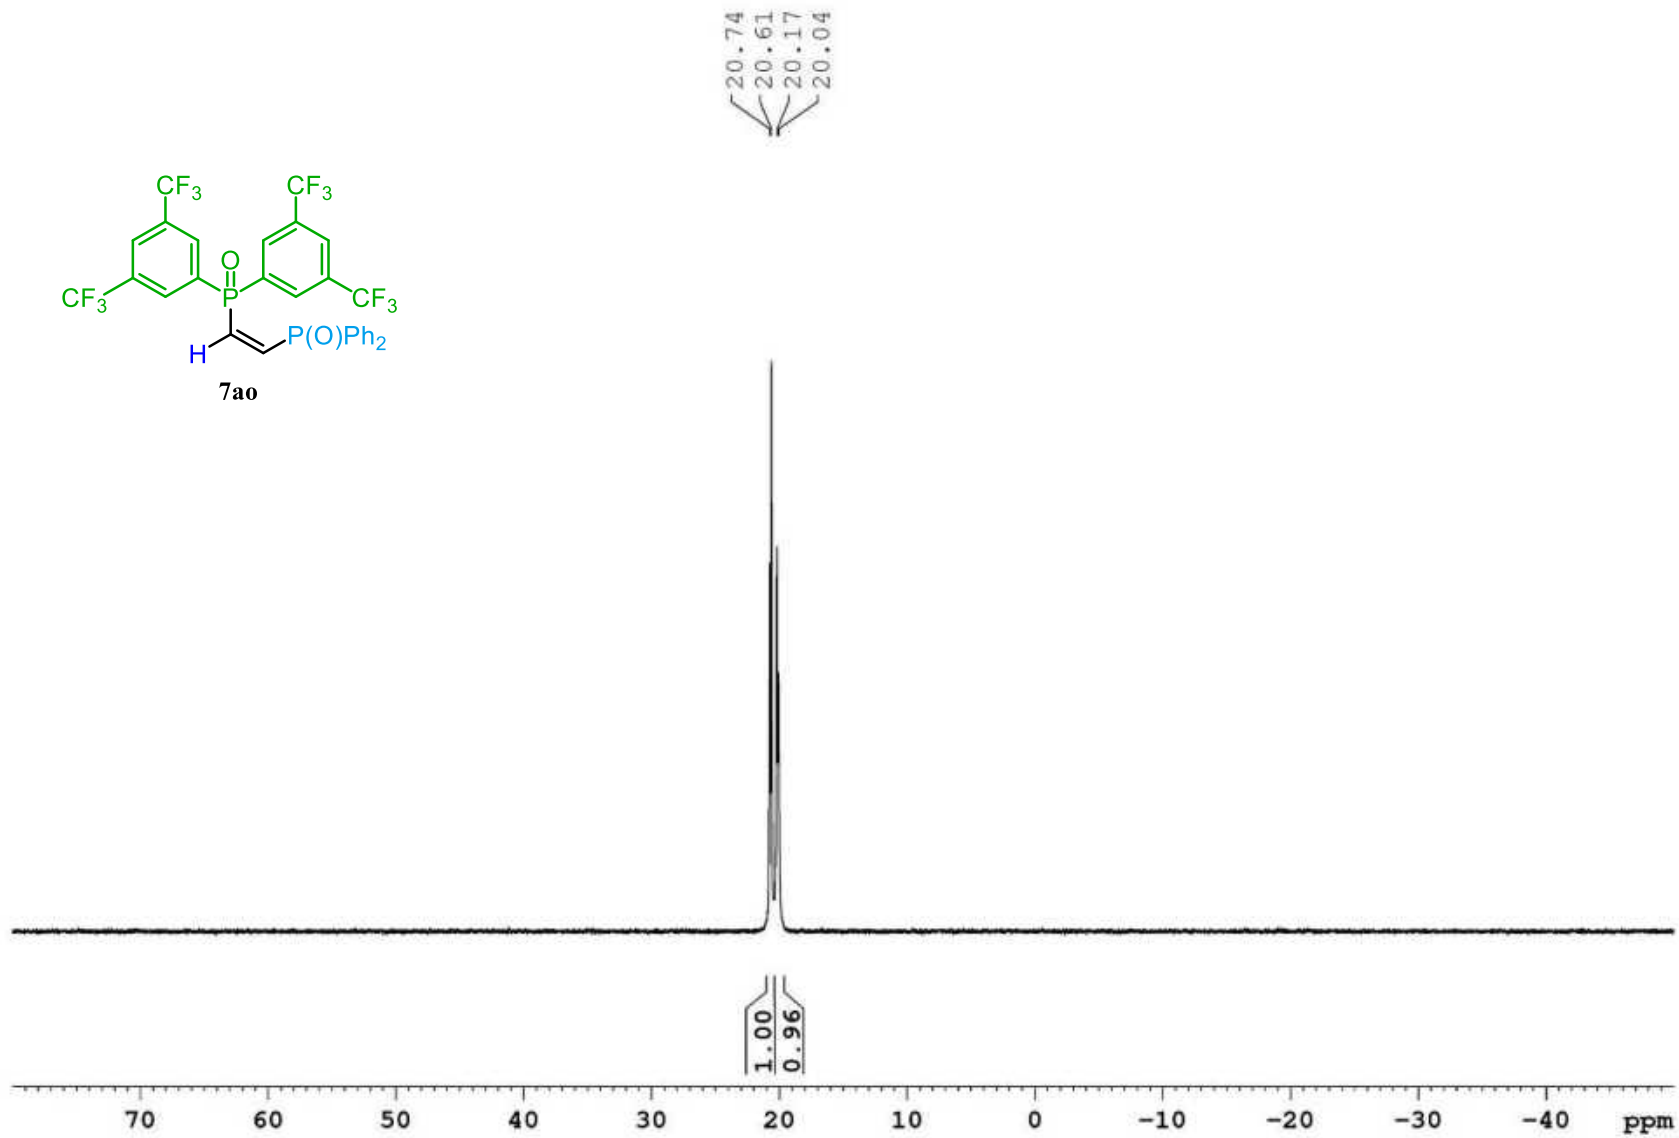

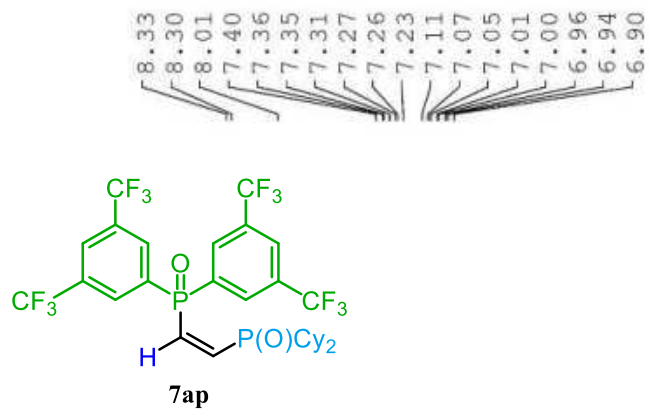

8.33  
8.30  
8.01  
7.40  
7.36  
7.35  
7.31  
7.27  
7.26  
7.23  
7.11  
7.07  
7.05  
7.01  
7.00  
6.96  
6.94  
6.90

1.76  
1.68  
1.66  
1.64  
1.21  
1.19  
1.16  
1.14

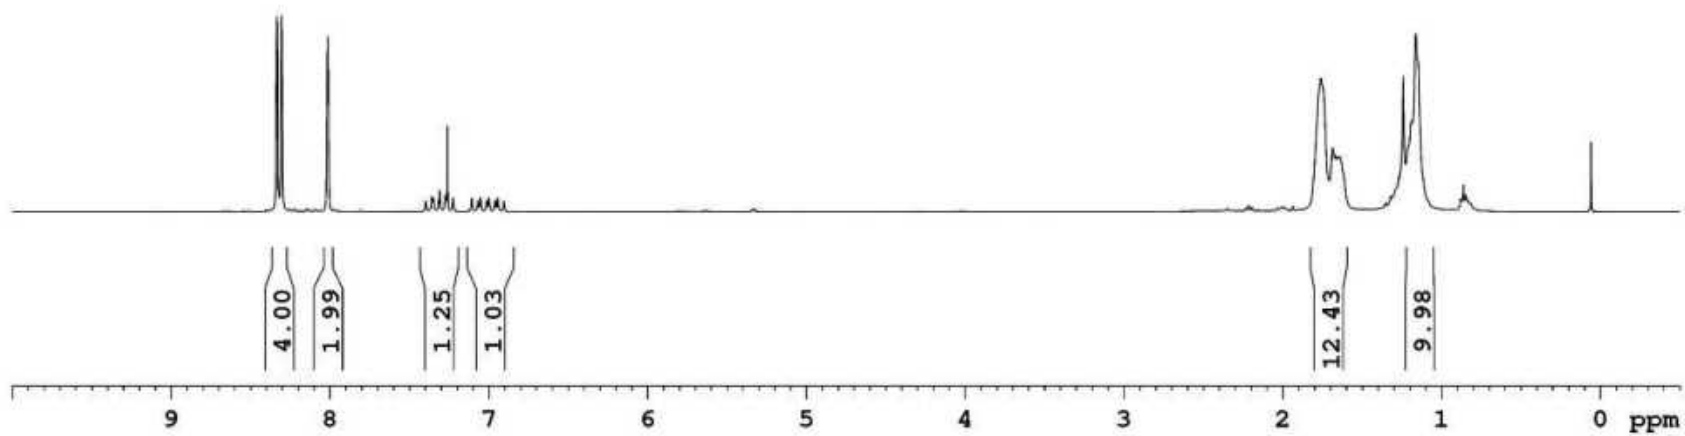

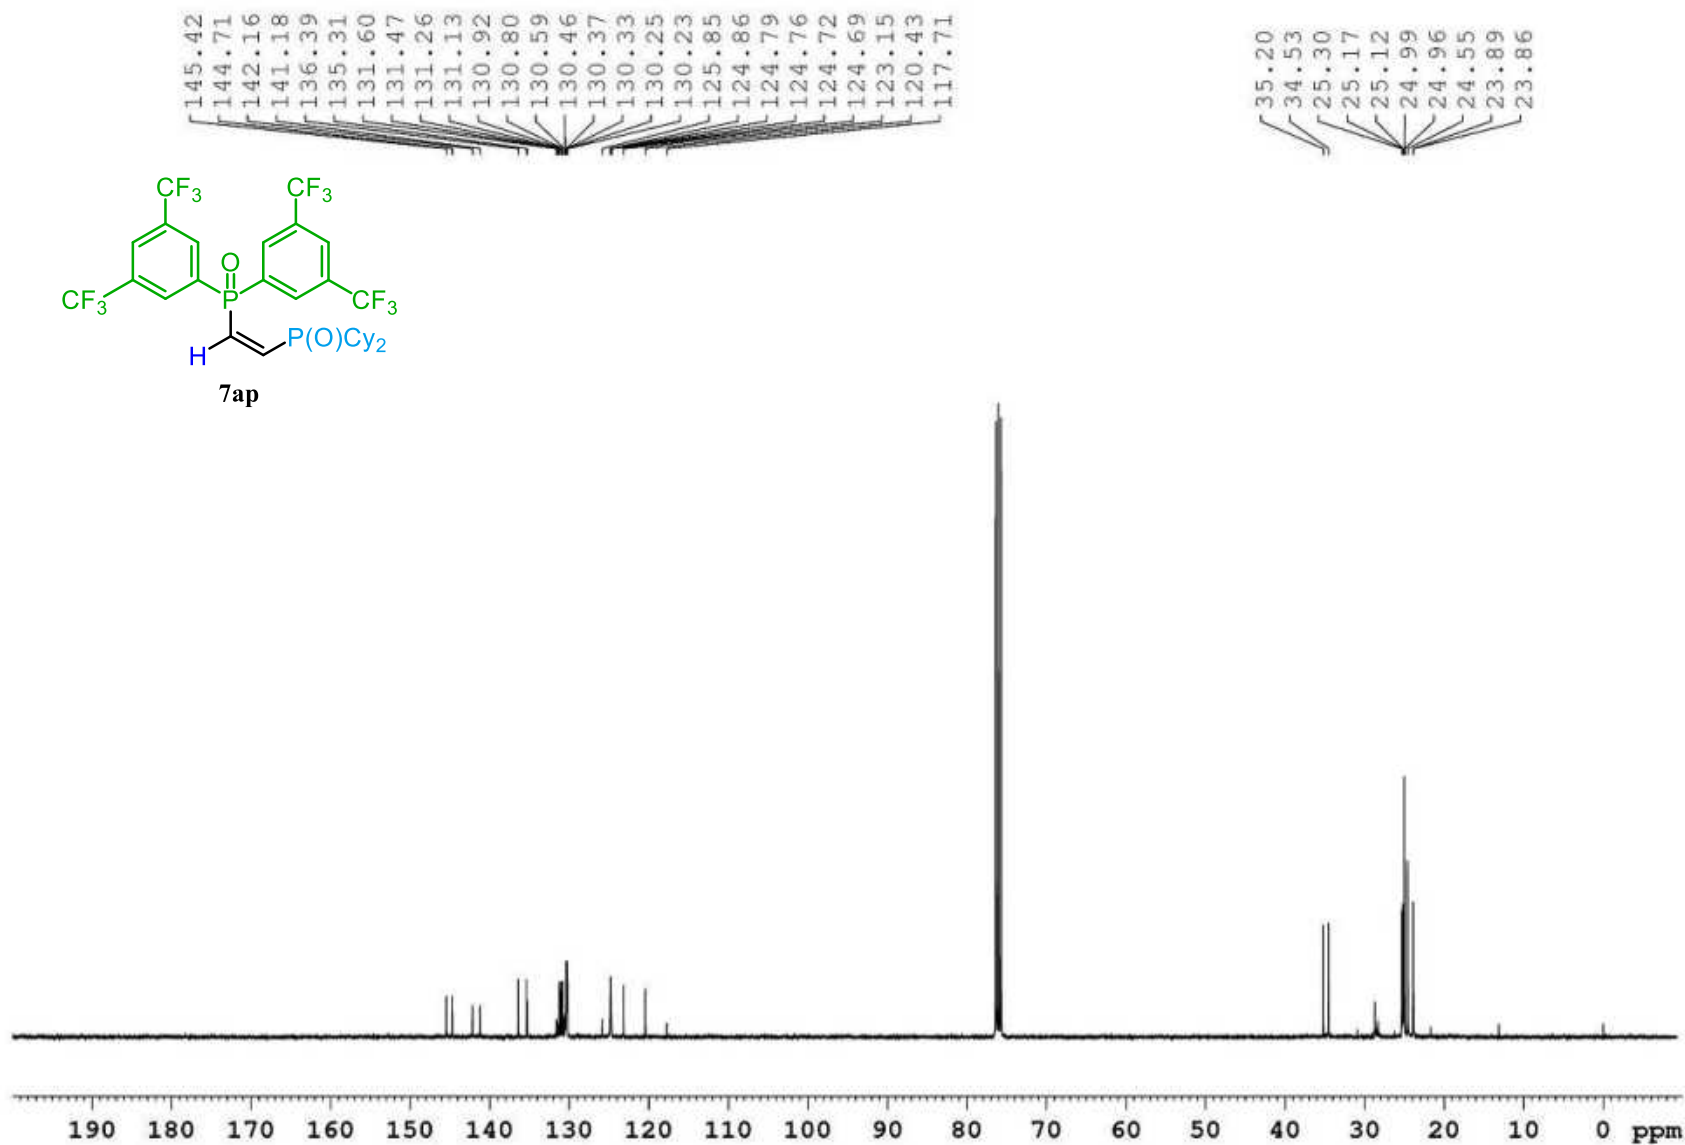



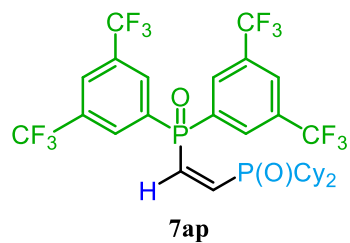

44.77  
44.66

17.74  
17.63

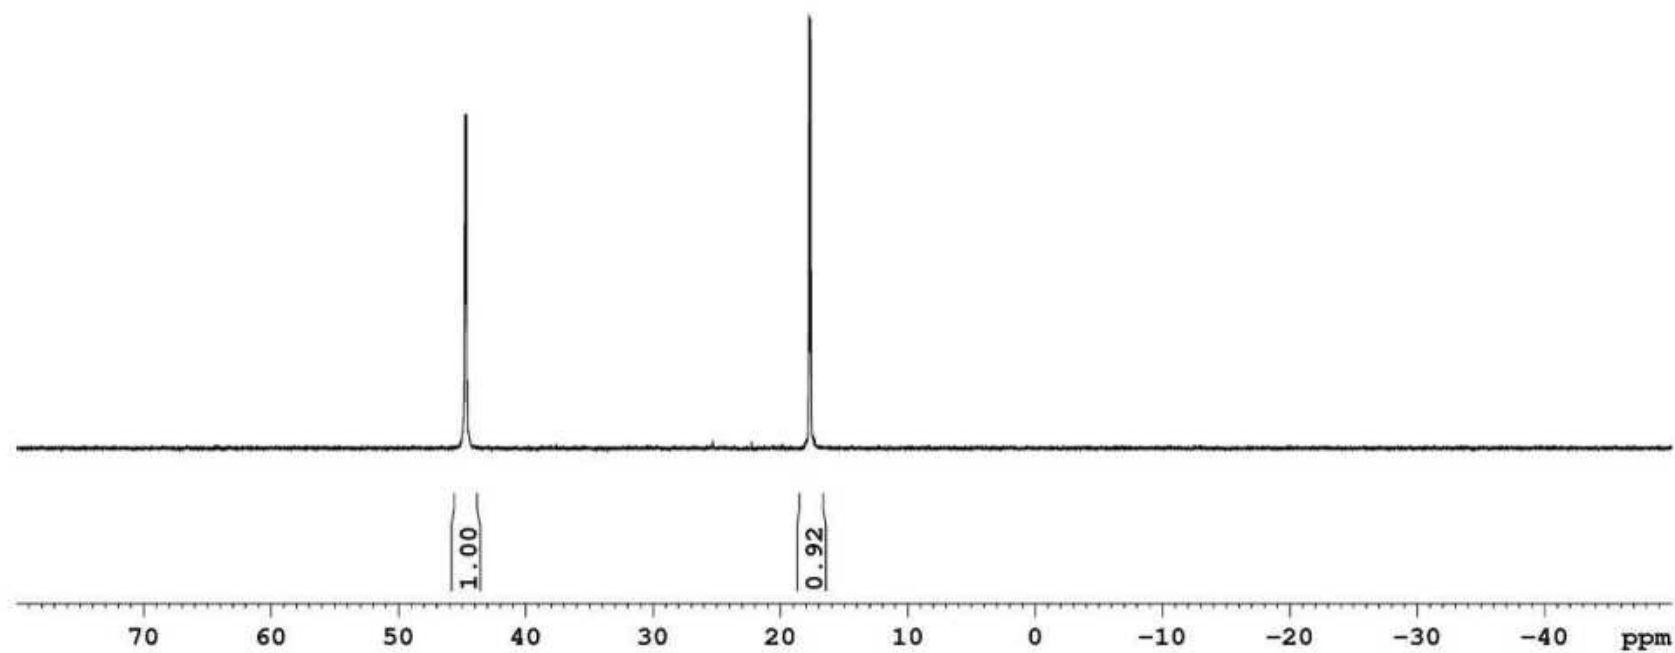

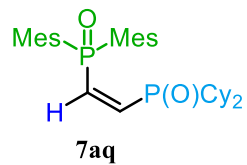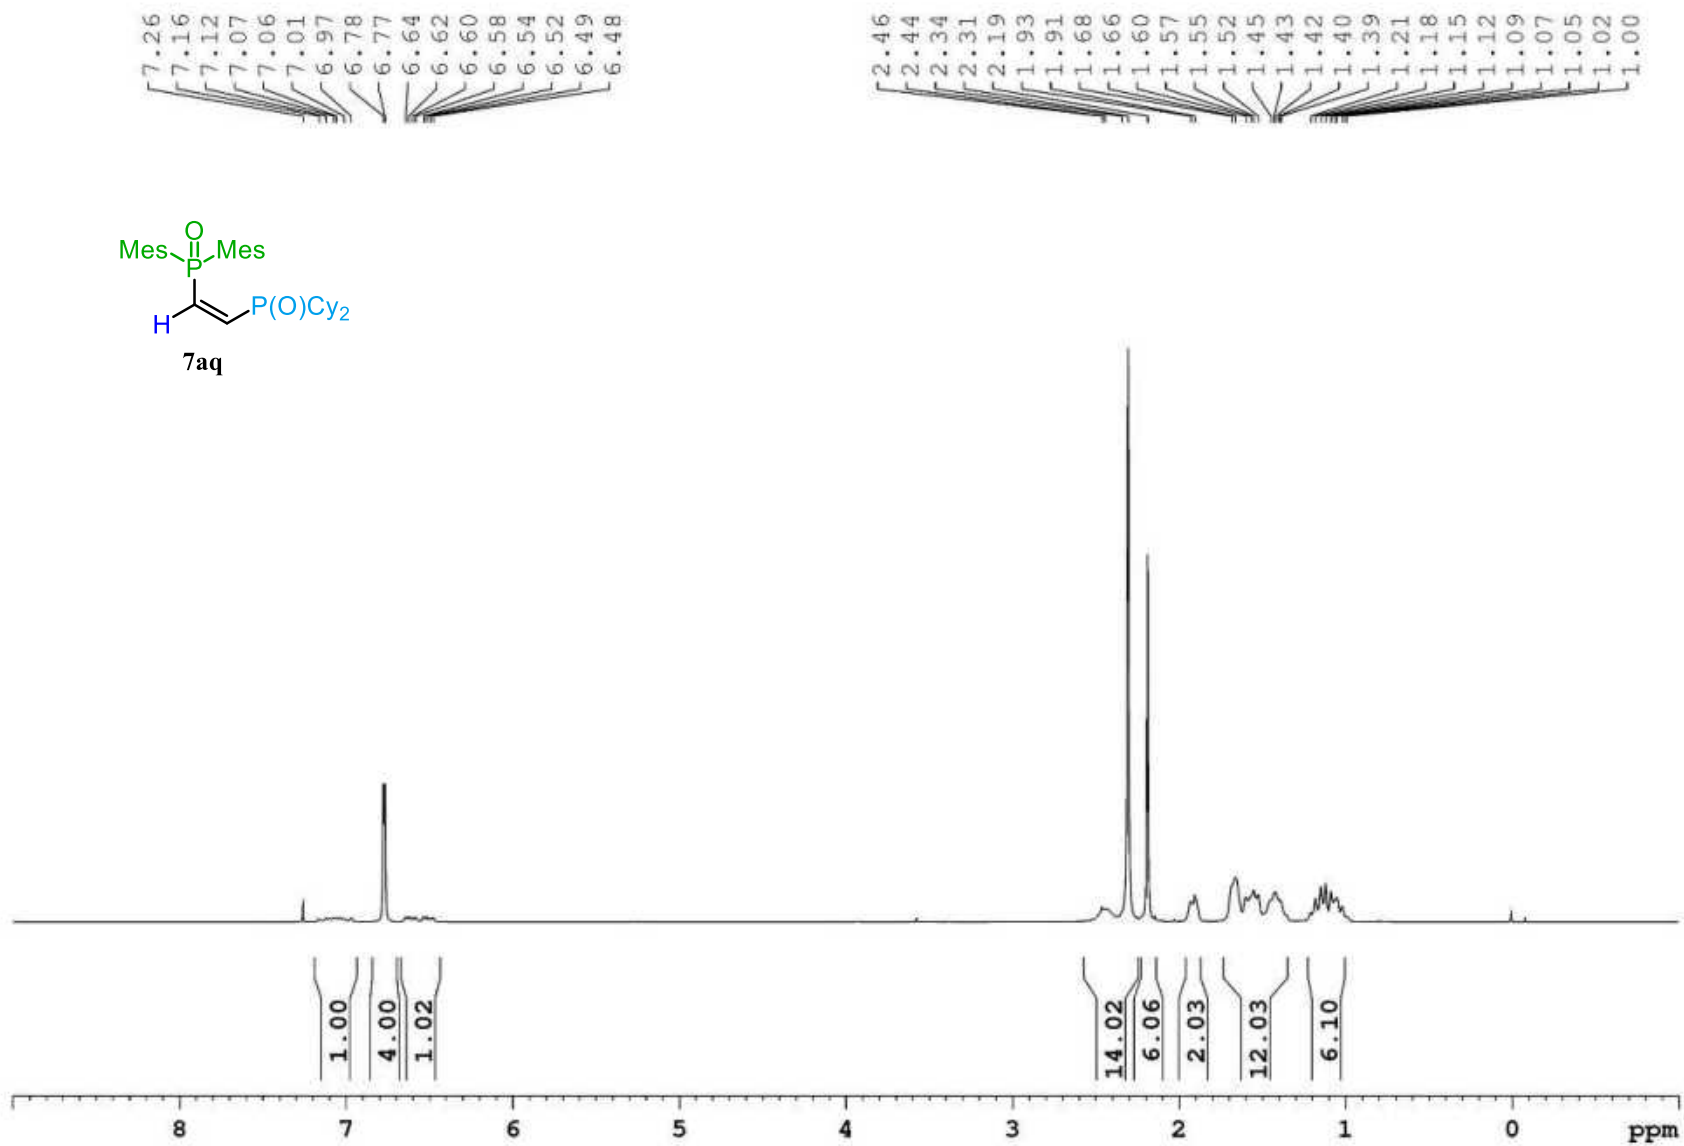

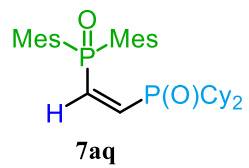

144.56  
143.62  
142.53  
141.49  
141.39  
131.26  
131.15  
129.74  
128.74

38.47  
37.82  
26.33  
26.30  
26.27  
26.20  
26.17  
26.04  
25.78  
23.05  
23.00  
20.92  
20.92

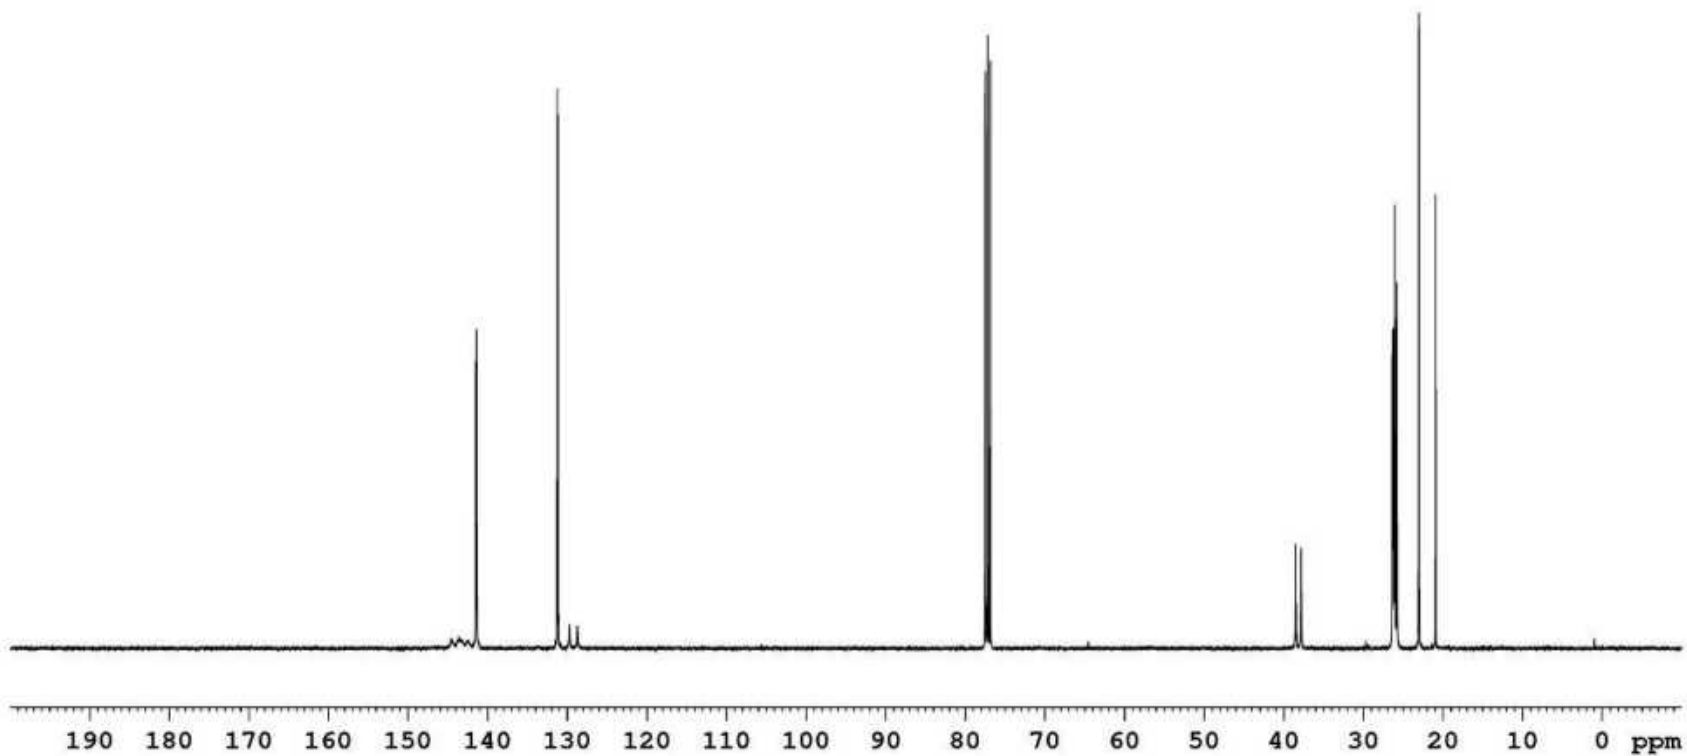

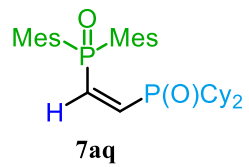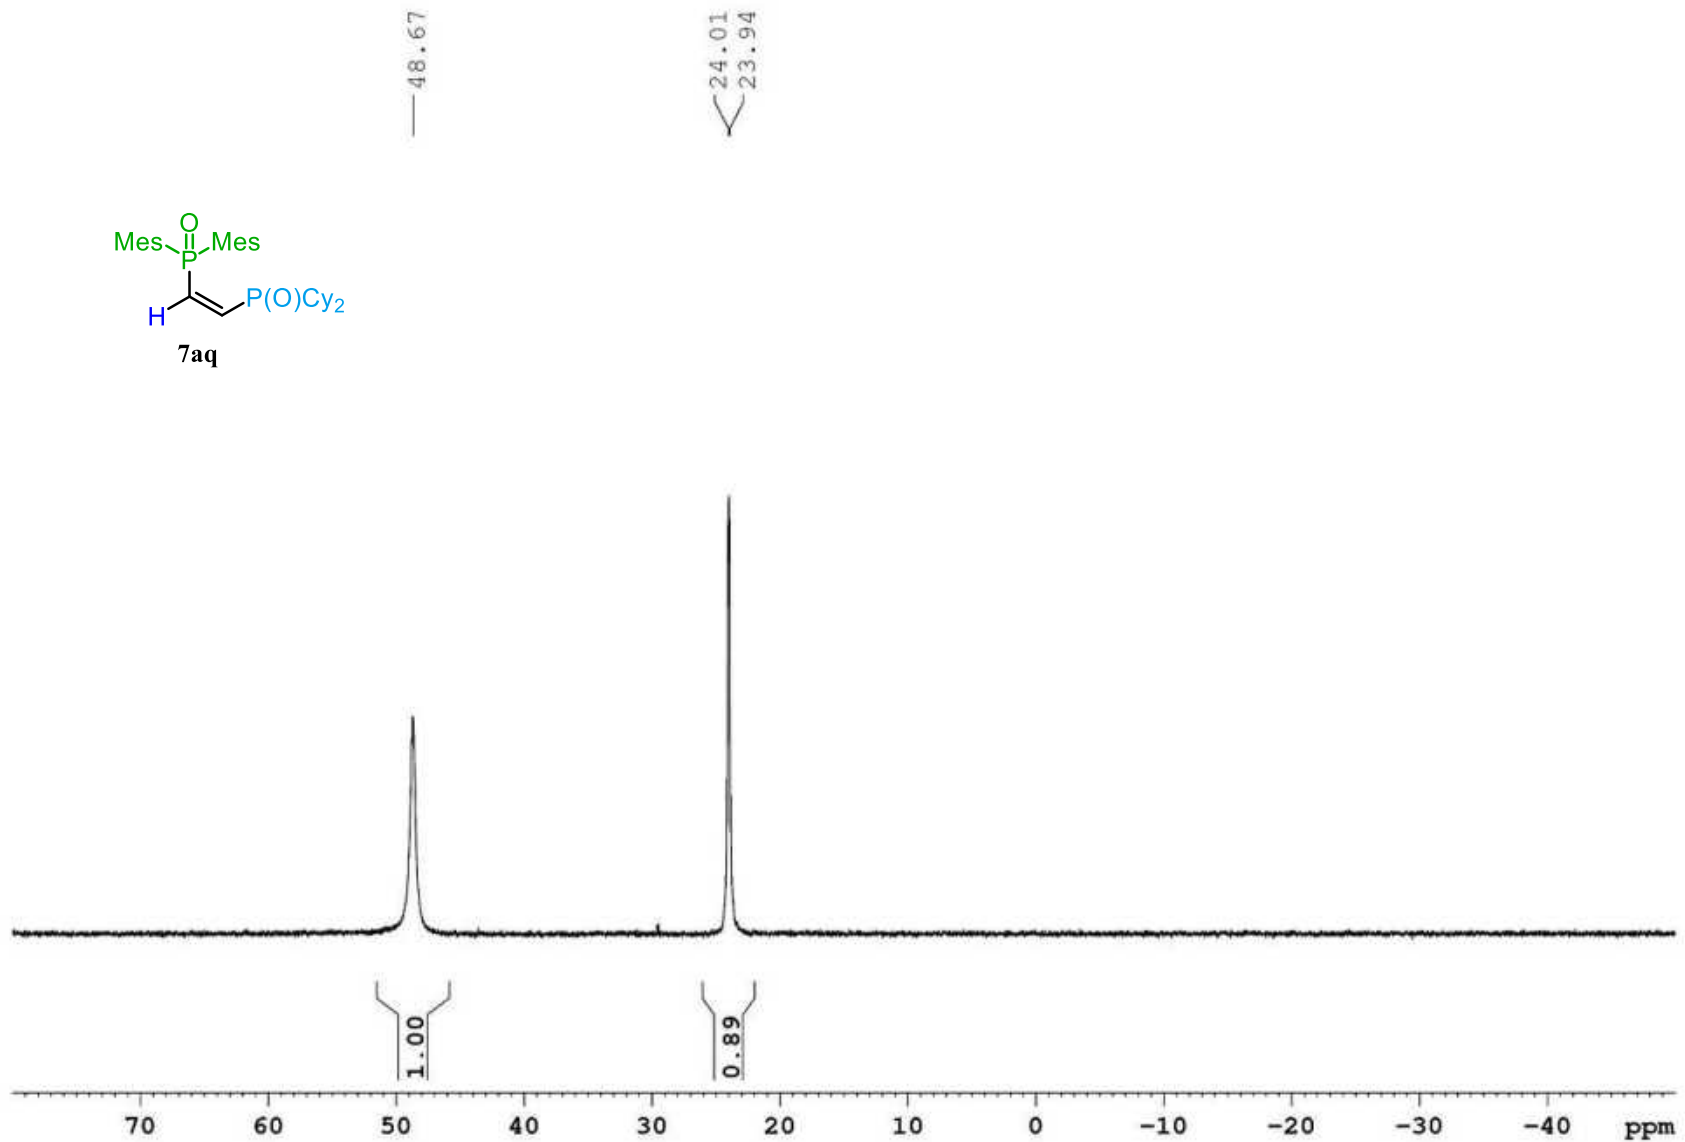

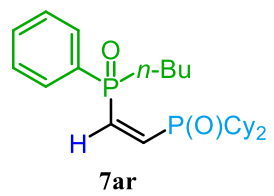

7.86  
7.84  
7.83  
7.81  
7.42  
7.41  
7.36  
7.35  
7.26  
7.05  
6.92  
6.89  
6.44  
6.30  
6.26

2.53  
2.51  
2.48  
2.46  
1.94  
1.87  
1.73  
1.63  
1.53  
1.33  
1.31  
1.16  
1.11  
0.99  
0.81  
0.79  
0.78

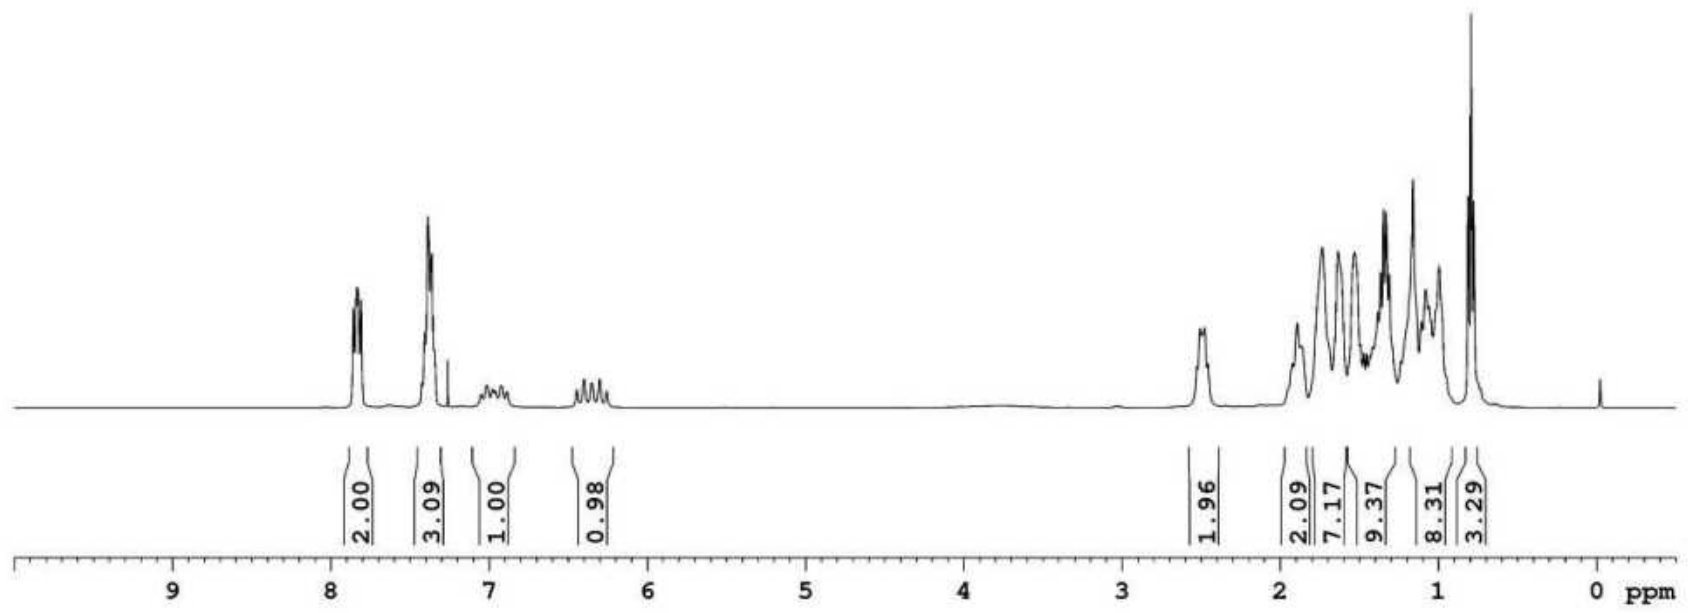

146.78  
145.93  
139.61  
138.86  
133.38  
132.39  
131.56  
131.22  
131.12  
128.33  
128.21

36.64  
36.50  
35.96  
35.82  
30.18  
29.47  
26.41  
26.27  
26.19  
26.13  
26.09  
26.06  
25.79  
25.75  
25.62  
25.05  
25.02  
24.77  
24.74  
24.07  
23.91  
23.57  
23.53  
13.65

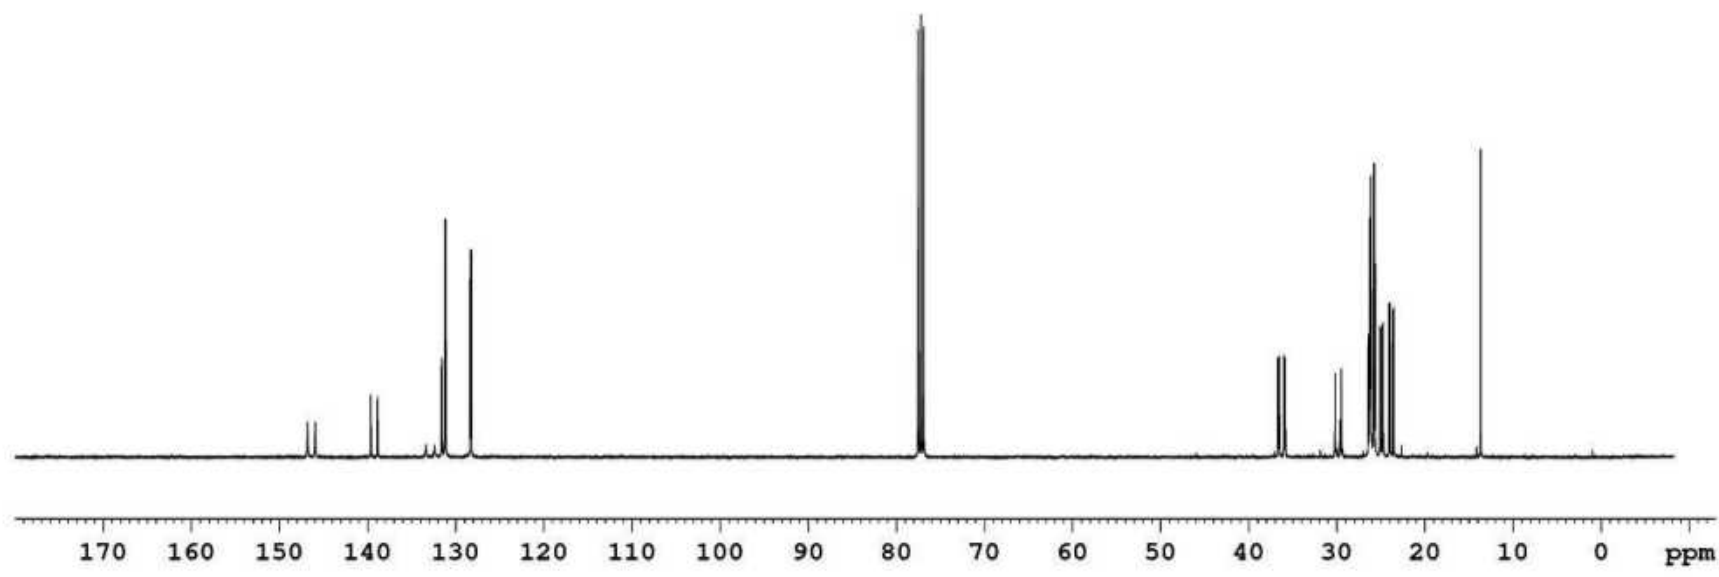

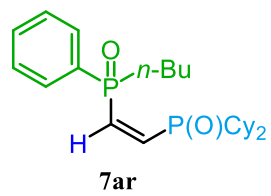

45.52  
45.44

31.23  
31.13

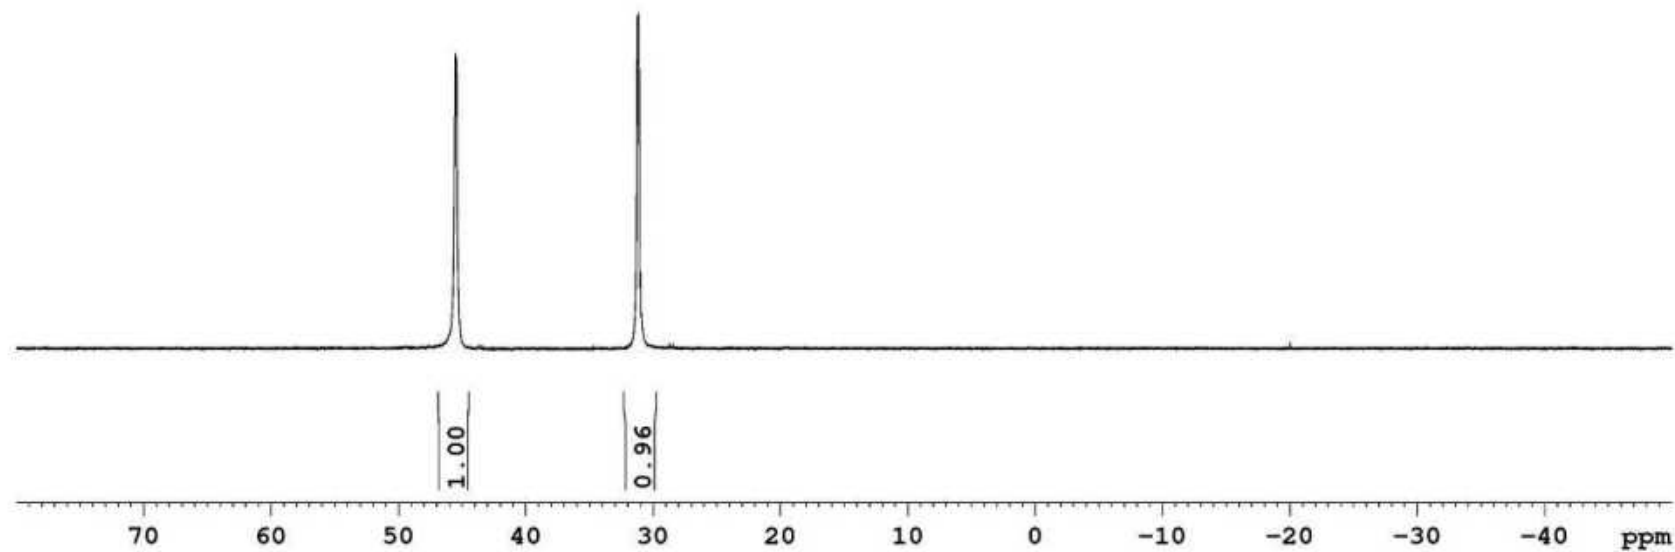

7.71  
7.70  
7.68  
7.67  
7.53  
7.51  
7.49  
7.47  
7.46  
7.45  
7.44  
7.43  
7.43  
7.26  
7.13  
7.09  
7.07  
7.04  
7.03  
7.00  
6.98  
6.94  
6.89  
6.87  
6.84  
6.83  
6.78  
6.76  
6.74  
6.72

2.52  
2.49  
2.47  
2.44  
1.96  
1.92  
1.75  
1.71  
1.67  
1.56  
1.52  
1.50  
1.48  
1.38  
1.32  
1.31  
1.29  
1.25  
1.22  
1.18  
1.16  
0.96

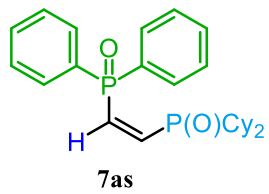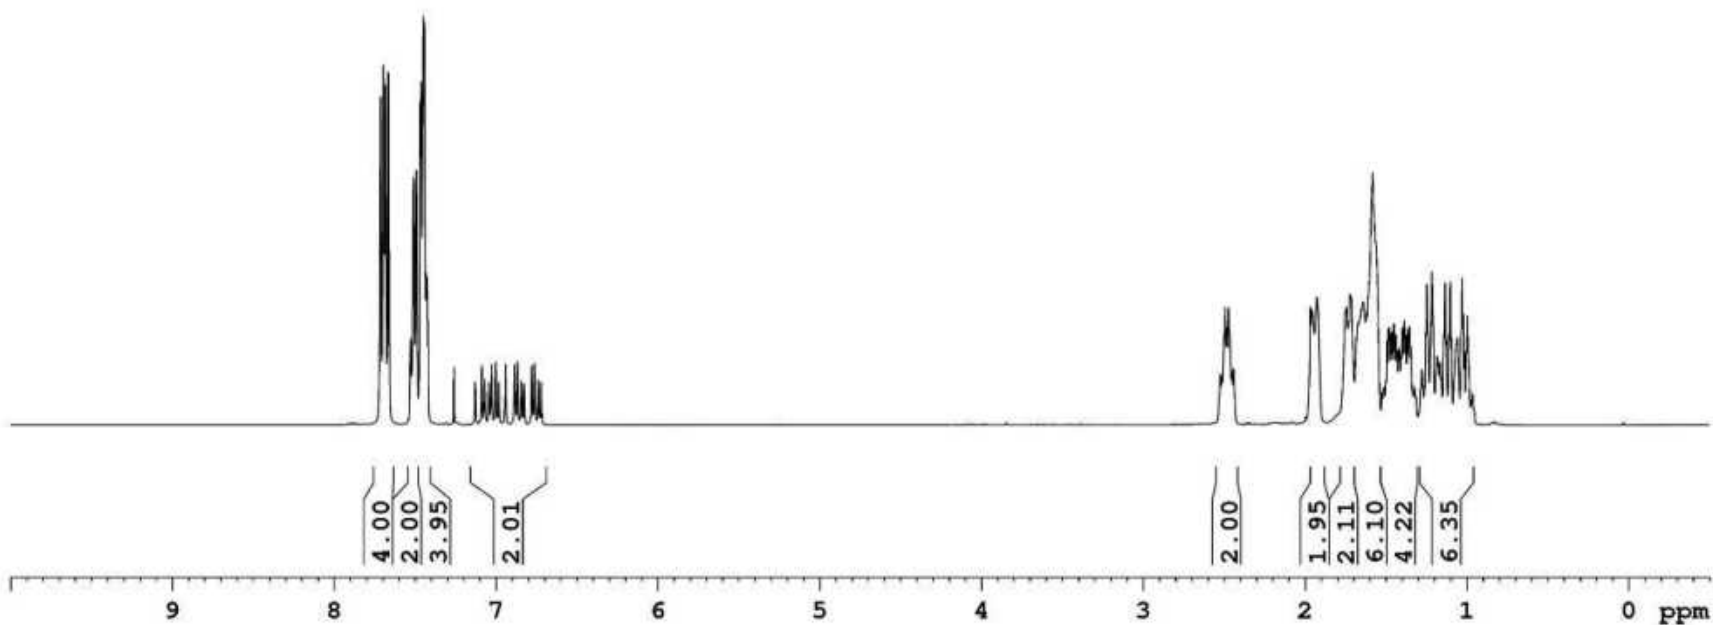



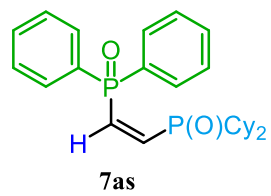

147.08  
146.36  
139.33  
138.39  
133.06  
132.19  
132.17  
132.00  
131.07  
130.97  
128.85  
128.73

38.18  
37.53  
26.45  
26.41  
26.28  
26.15  
25.82  
25.78  
25.77

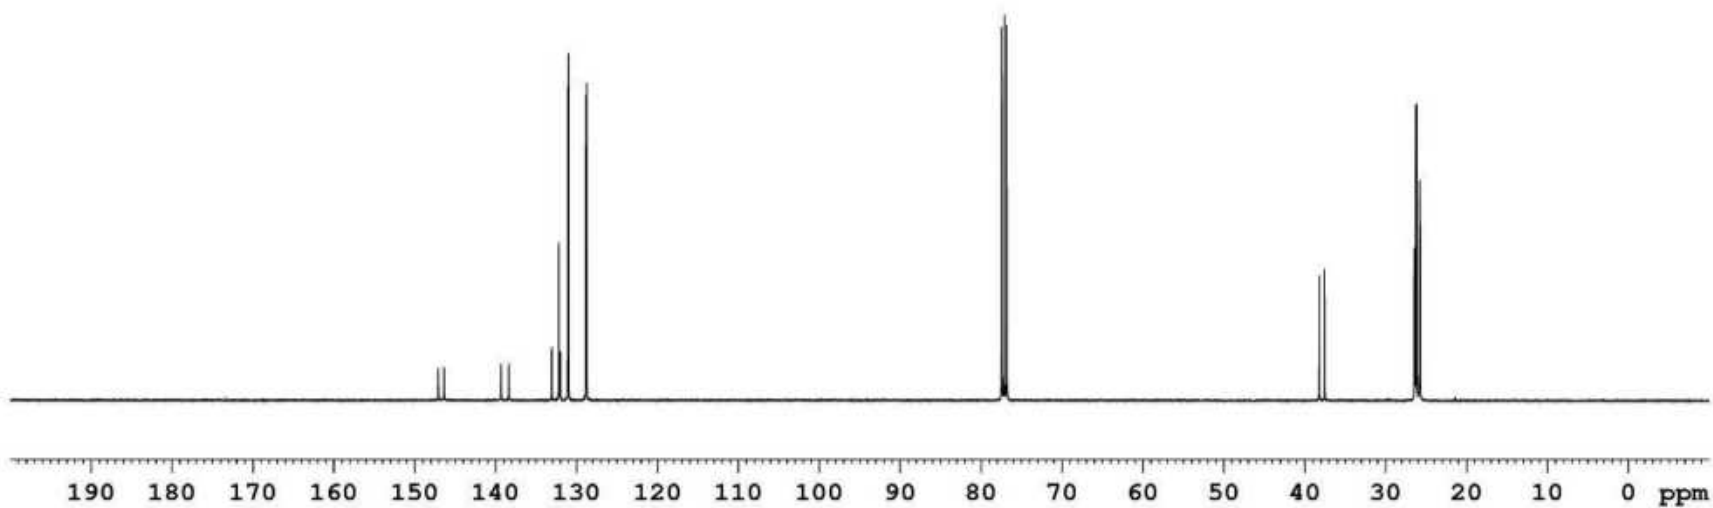

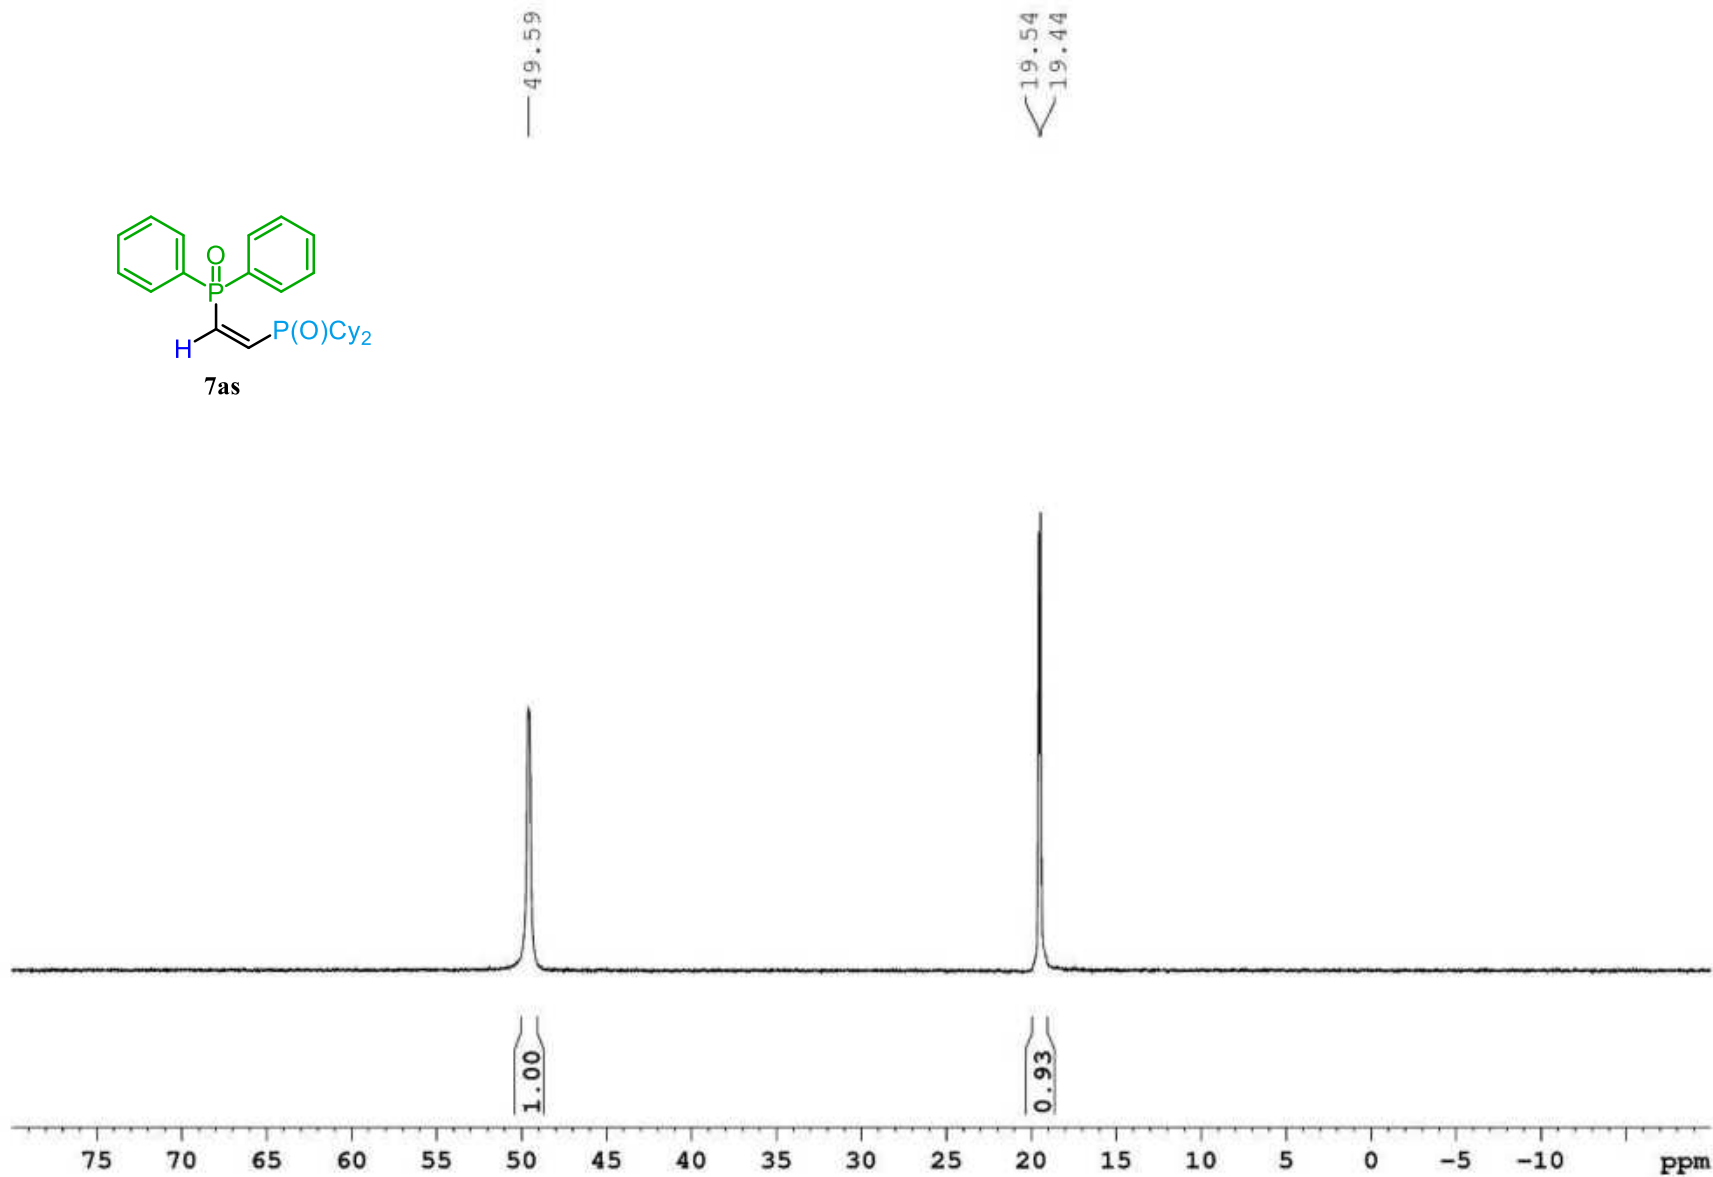

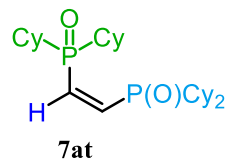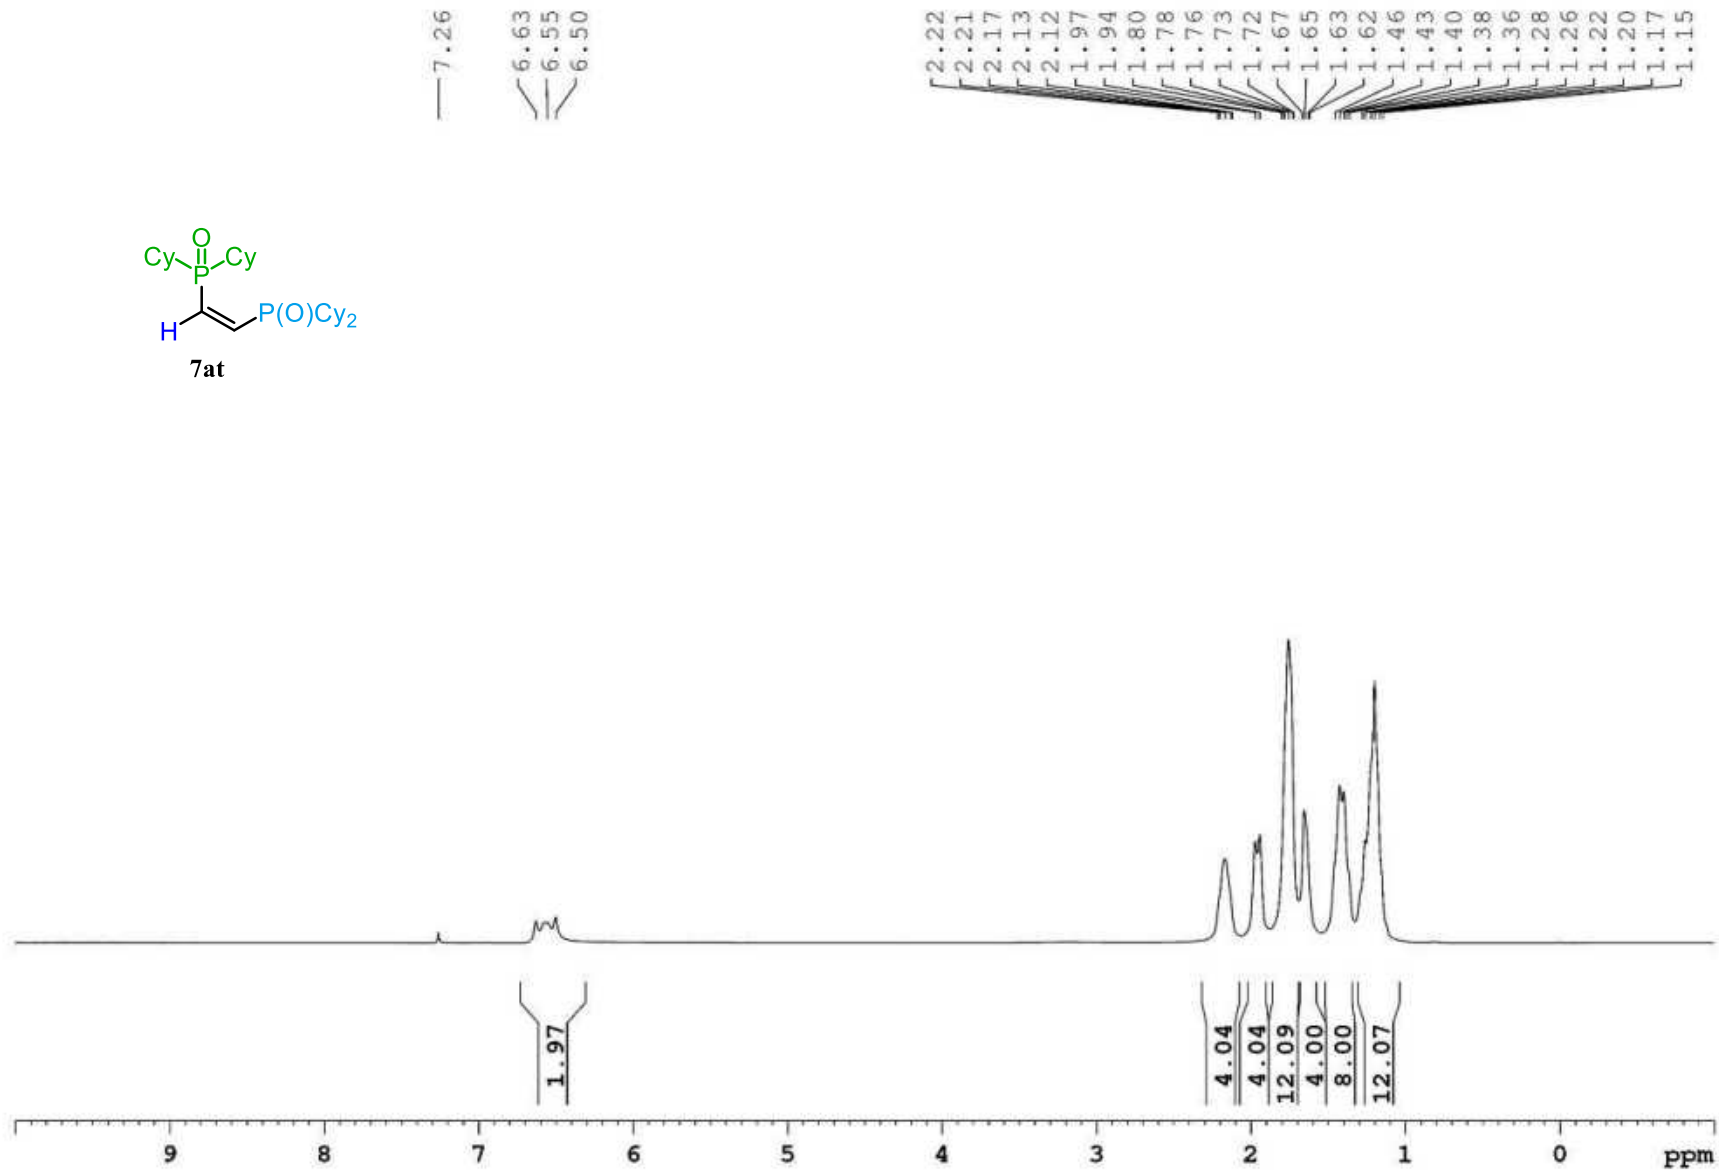



143.83  
143.06

37.81  
37.13  
26.35  
26.30  
26.23  
25.79  
25.67

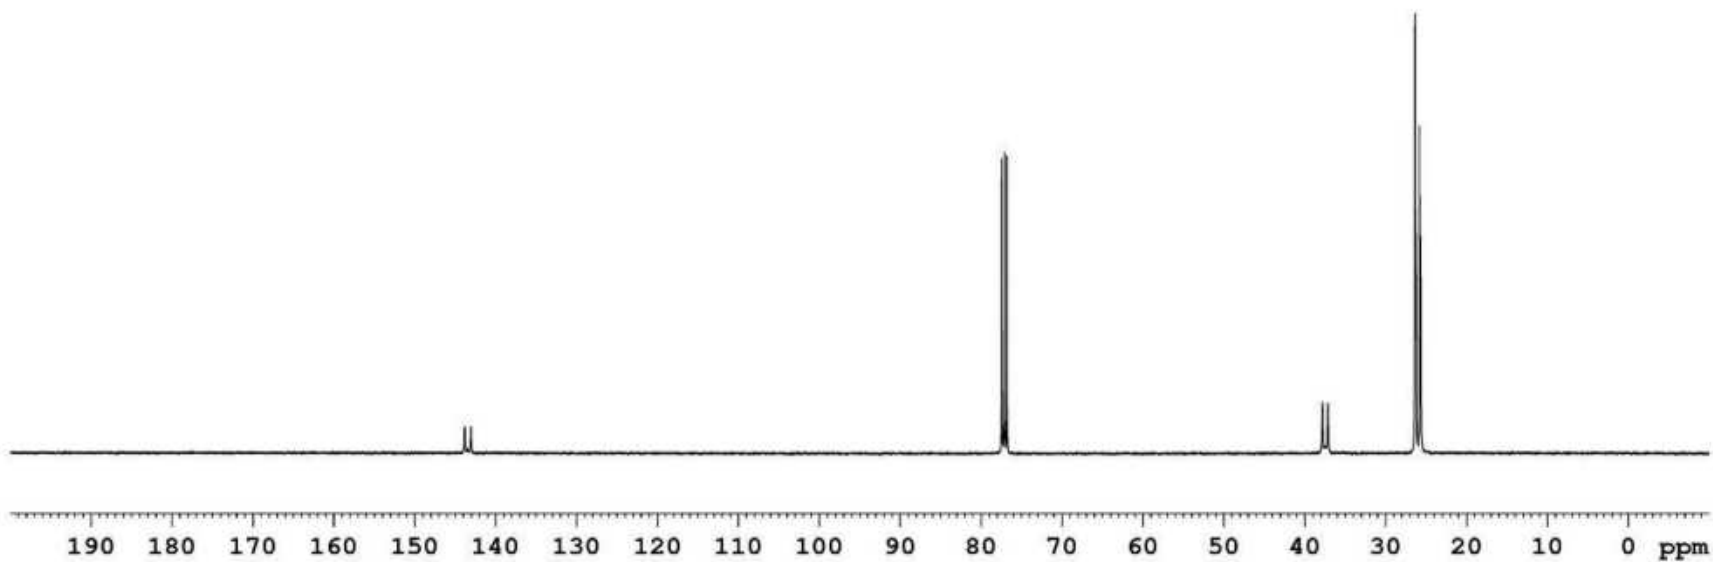



—46.26

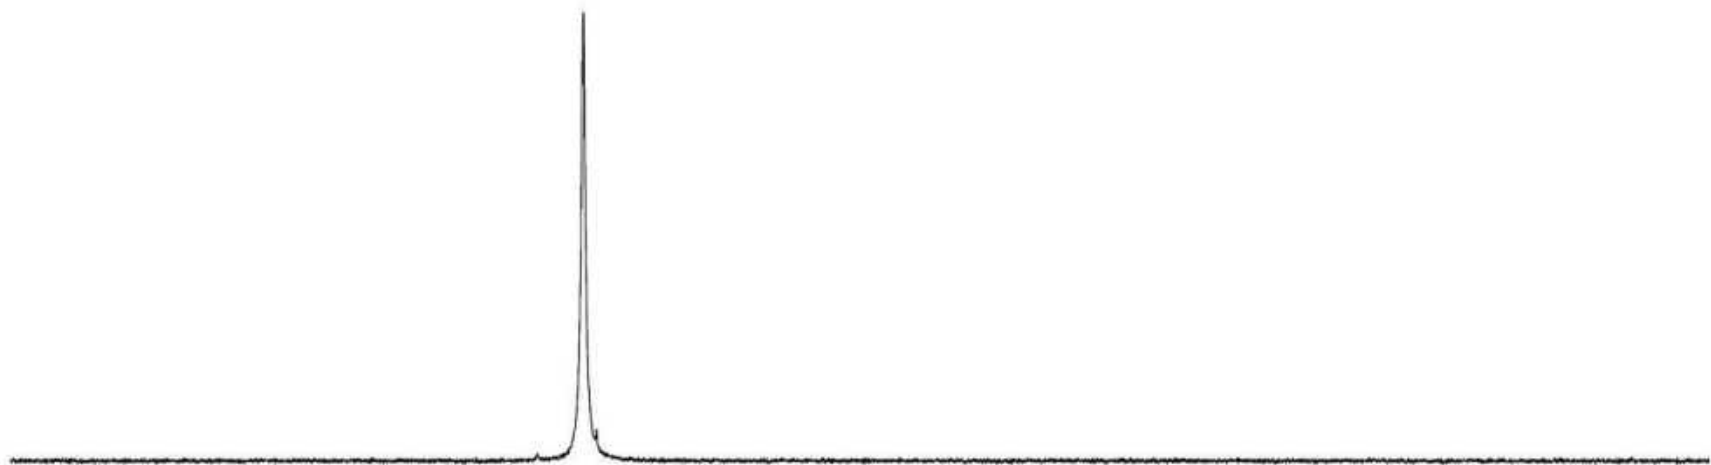

75 70 65 60 55 50 45 40 35 30 25 20 15 10 5 0 -5 -10 ppm

S350

7.68  
7.66  
7.65  
7.63  
7.54  
7.52  
7.51  
7.48  
7.47  
7.46  
7.45  
7.44  
7.43  
7.02  
6.98  
6.95  
6.91  
6.88  
2.40  
2.39  
2.38  
2.37  
2.35  
2.34  
2.32  
2.31  
2.18  
2.17  
2.14  
2.14  
2.11  
2.10  
2.08  
1.63  
1.61  
1.60  
1.59  
1.58  
1.57  
1.43  
1.41  
1.41  
1.40  
1.39  
1.38  
1.36  
1.33  
1.31  
1.29  
1.27  
1.26  
1.24  
1.22  
1.20  
1.19  
0.78  
0.76  
0.74

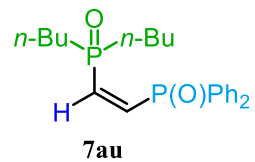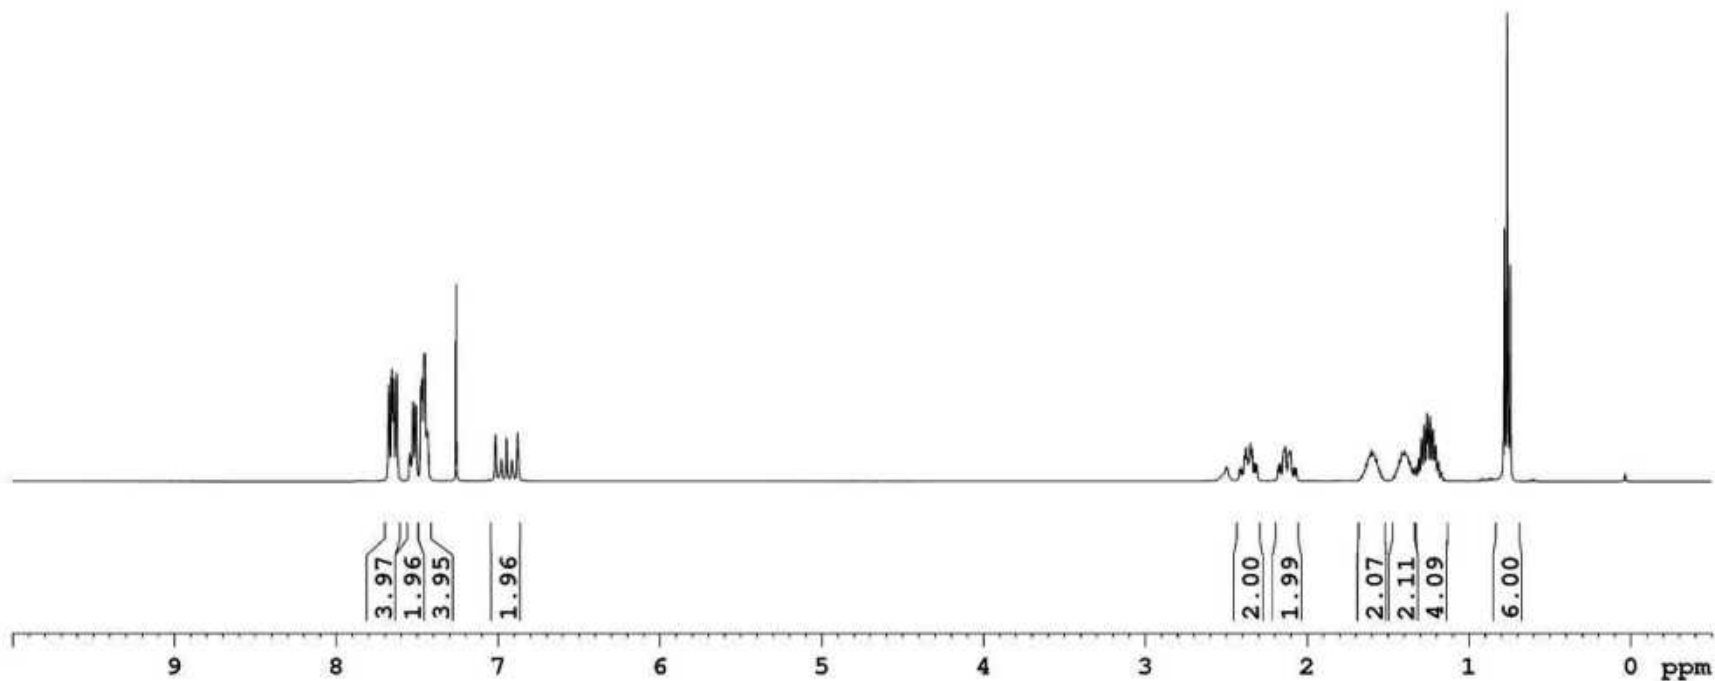

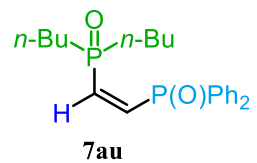

148.54  
147.77  
138.44  
137.51  
132.85  
132.34  
132.32  
131.79  
130.97  
130.87  
128.97  
128.85

30.62  
29.95  
24.16  
24.01  
23.78  
23.73  
13.57

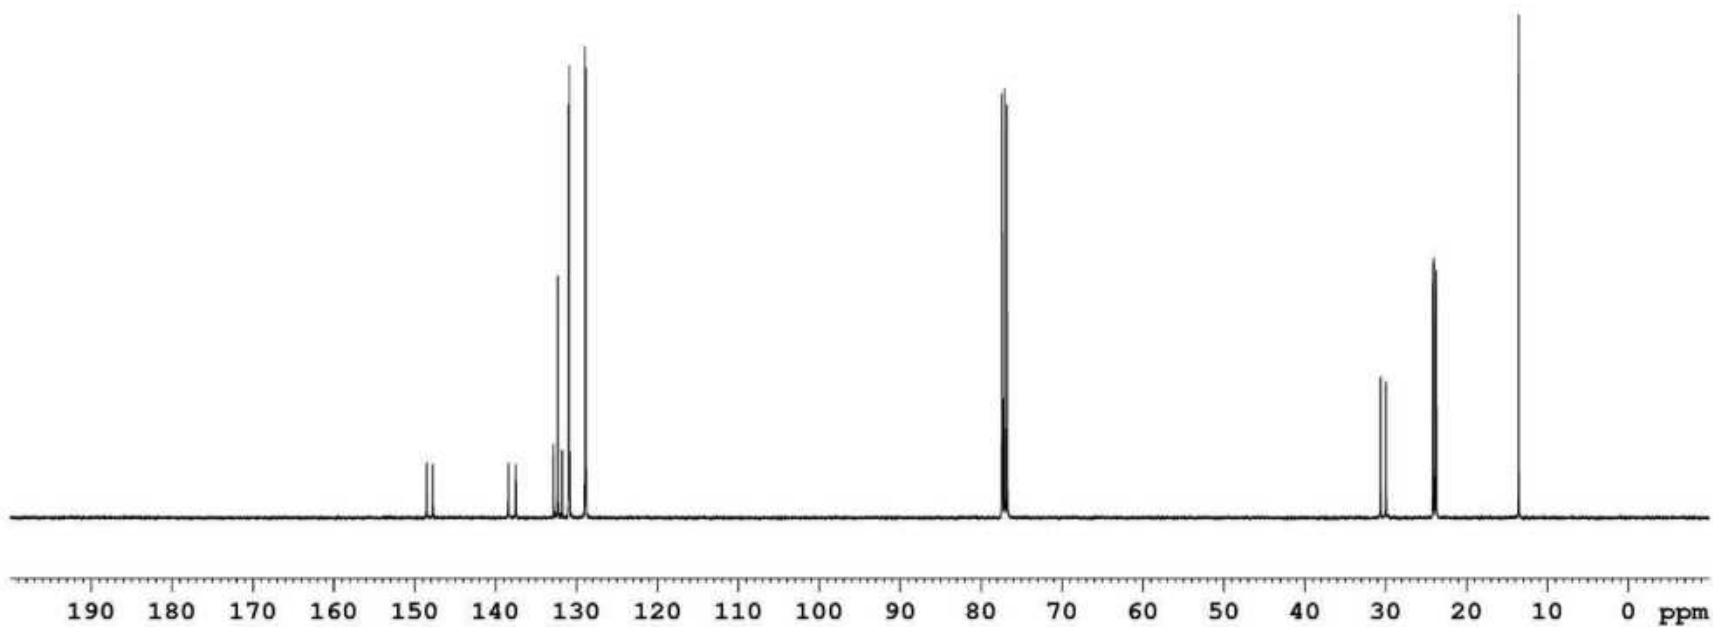

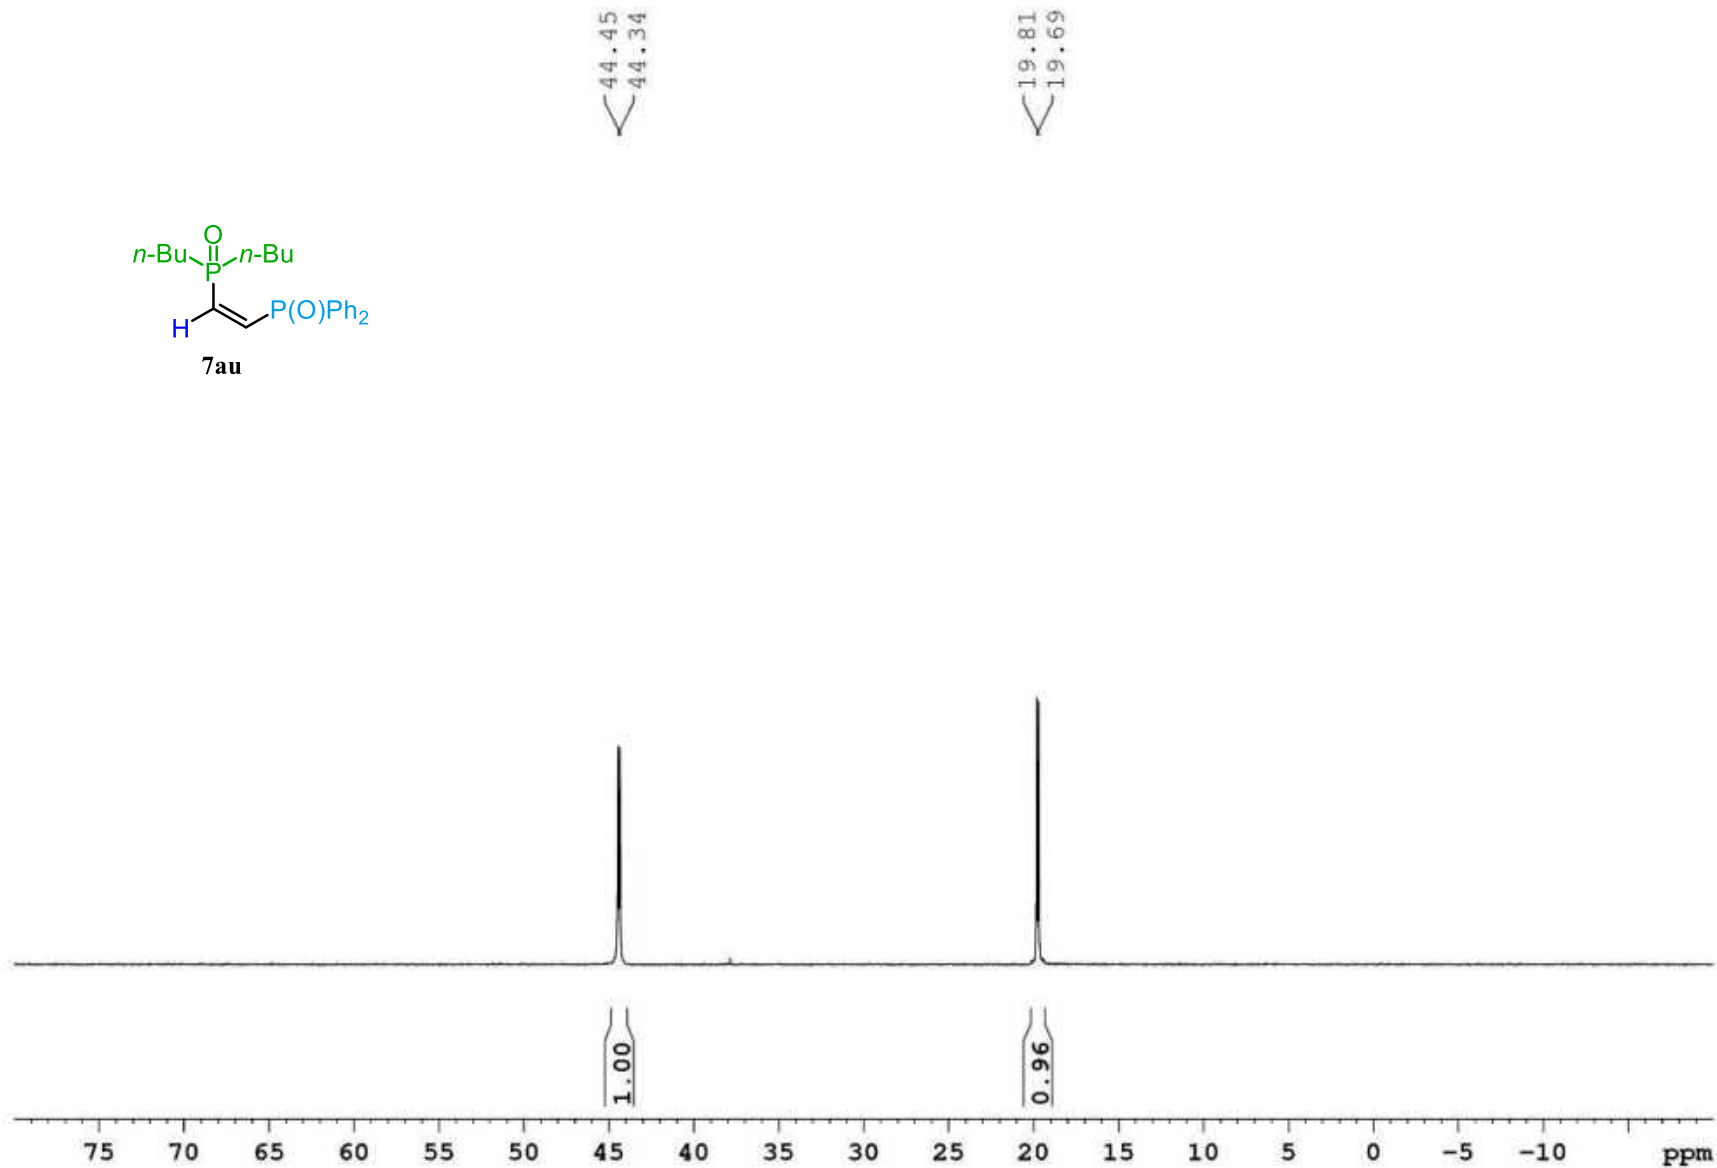



6.98  
6.94  
6.92  
6.87  
6.85  
6.83  
6.37  
6.33  
6.31  
6.28  
6.25  
6.22  
6.18  
2.28  
2.27  
2.24  
2.23  
2.22  
2.20  
2.19  
2.17  
2.15  
2.14  
2.12  
2.09  
2.08  
1.91  
1.88  
1.79  
1.77  
1.72  
1.69  
1.64  
1.62  
1.61  
1.59  
1.58  
1.52  
1.50  
1.49  
1.47  
1.46  
1.44  
1.43  
1.39  
1.36  
1.34  
1.32  
1.30  
1.27  
1.24  
1.22  
1.20  
1.18  
1.15  
0.86  
0.84  
0.82

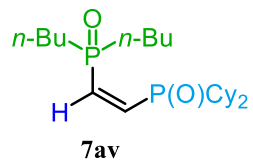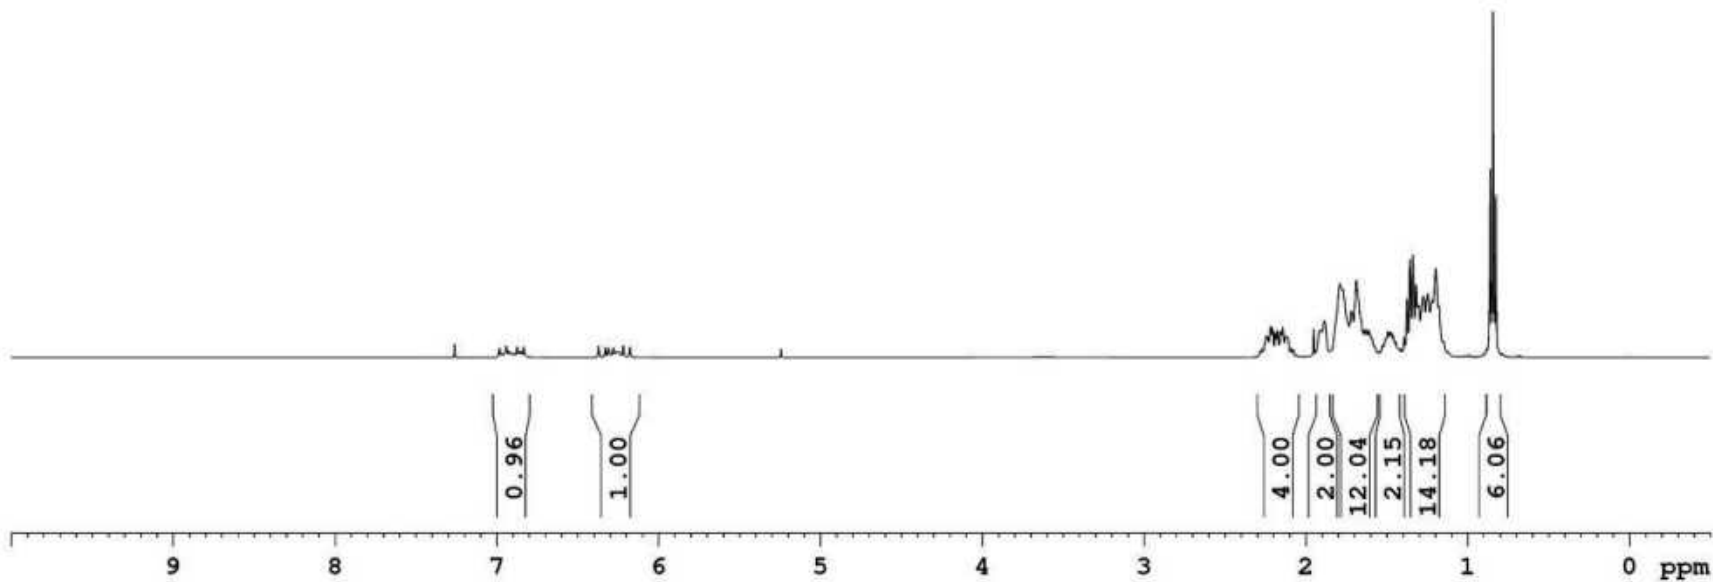

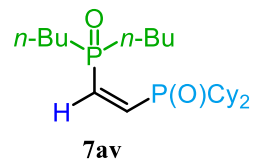

150.10  
149.33  
137.24  
137.20  
136.50  
136.46

35.95  
35.29  
30.56  
29.90  
26.38  
26.25  
26.22  
26.09  
26.03  
25.70  
24.74  
24.21  
24.06  
23.75  
23.70  
13.63

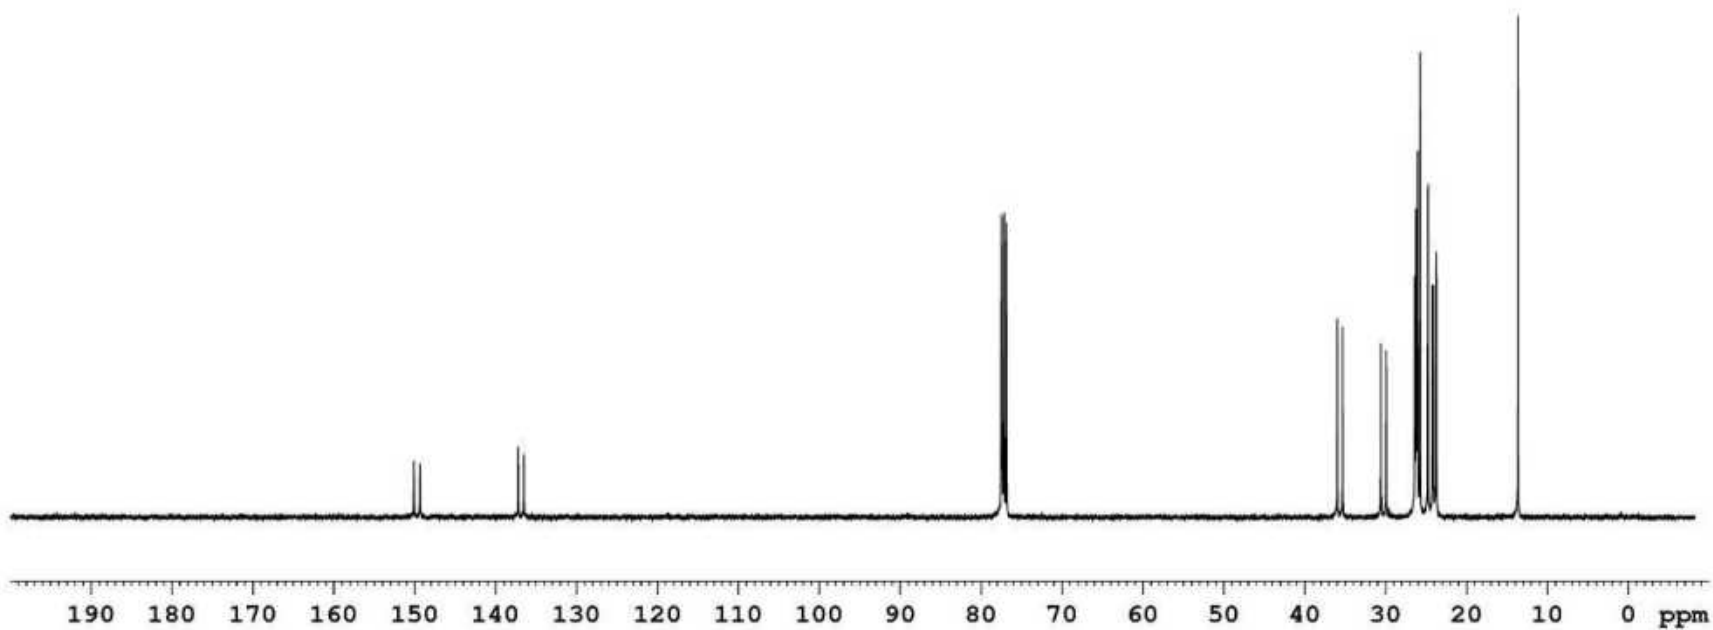



44.23  
44.13  
43.82  
43.73

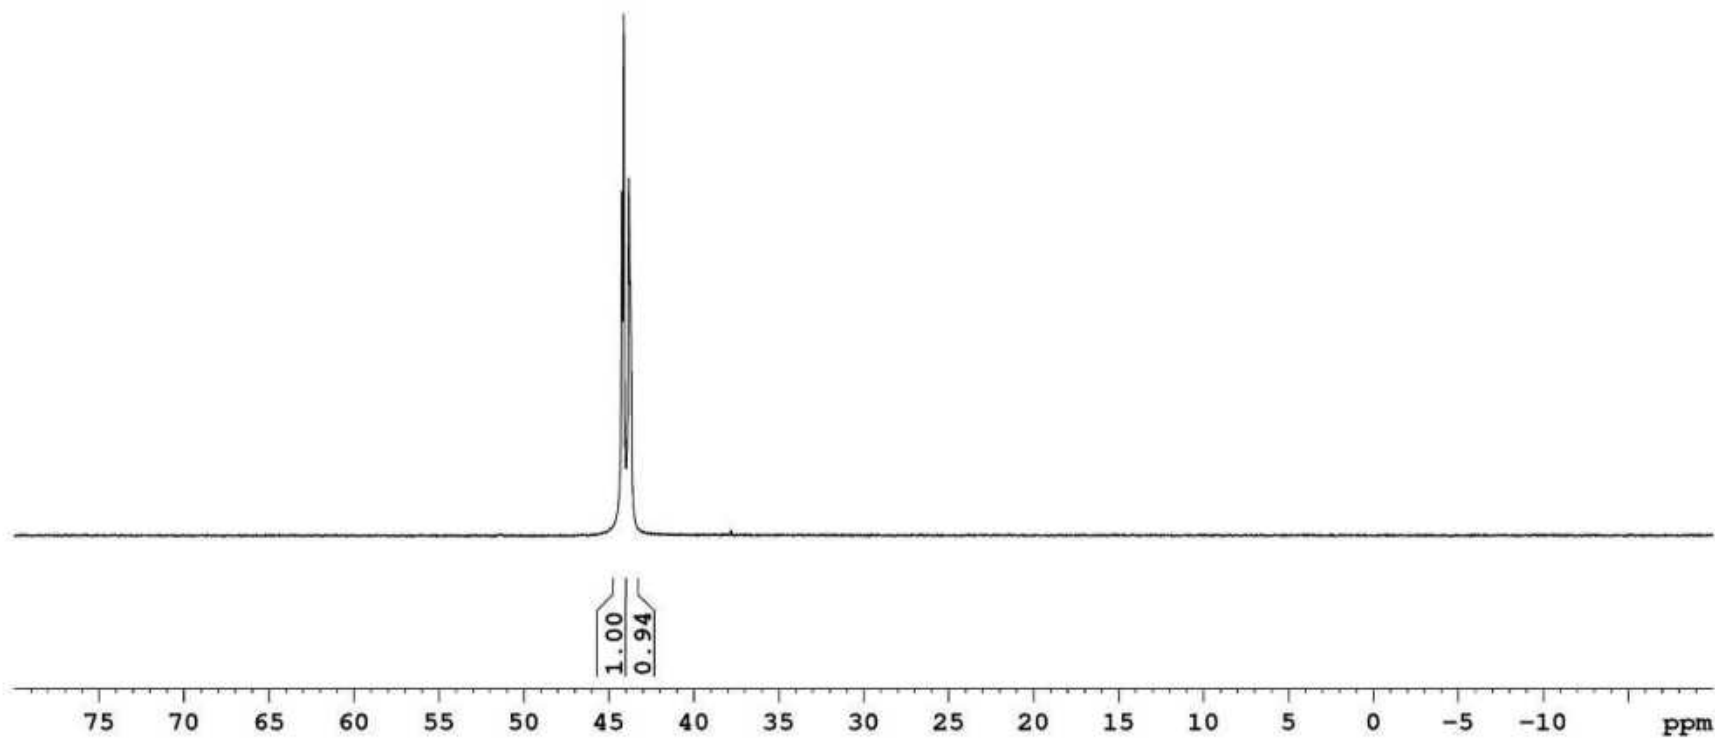

7.67  
7.65  
7.65  
7.64  
7.62  
7.62  
7.54  
7.54  
7.53  
7.52  
7.51  
7.50  
7.48  
7.47  
7.46  
7.45  
7.45  
7.44  
7.44  
7.43  
7.15  
7.13  
7.10  
7.09  
7.03  
7.00  
6.99  
6.96  
6.94  
6.90  
6.88  
6.83  
3.01  
2.99  
2.97  
1.92  
1.90  
1.89  
1.87  
1.83  
1.74  
1.73  
1.70  
1.68  
1.67  
1.65  
1.64  
1.62  
1.60  
1.58  
1.53  
1.51  
1.50  
1.47  
1.42  
1.39  
1.38  
1.34

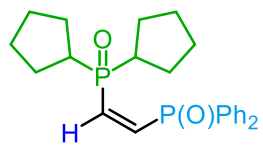

7aw

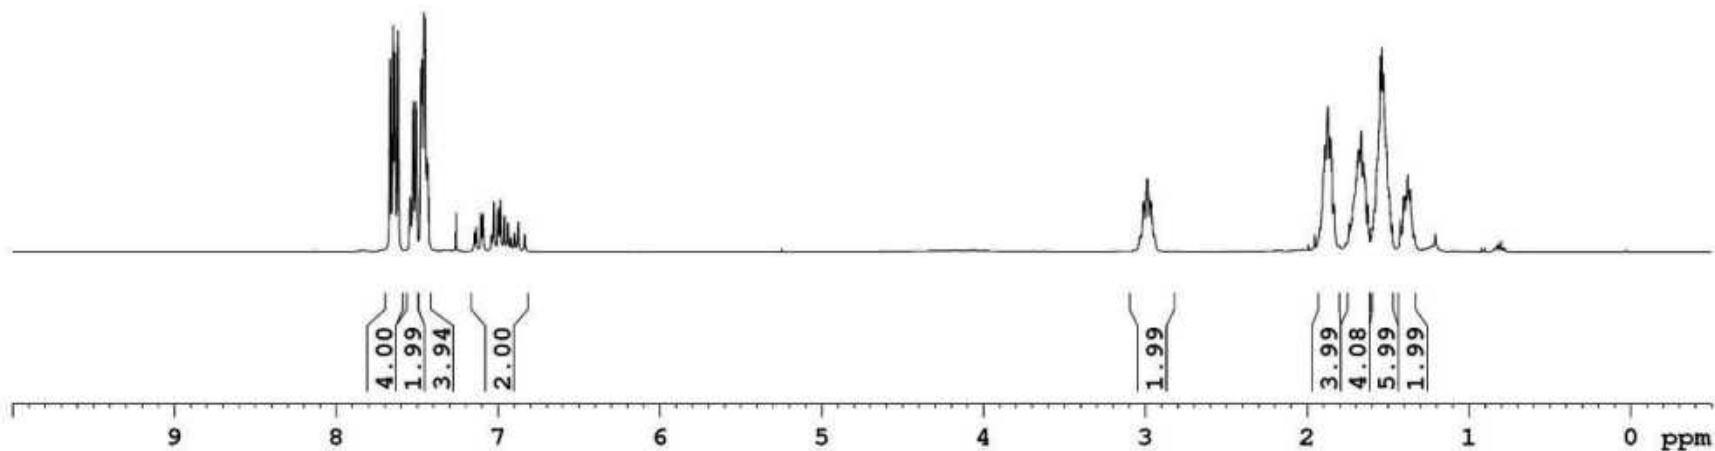

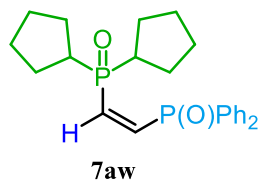

149.38  
148.63  
137.37  
136.43  
132.79  
132.36  
132.33  
131.73  
130.98  
130.88  
129.00  
128.87

38.90  
38.21  
27.49  
27.47  
26.82  
26.72  
26.25  
26.24  
26.06  
25.96

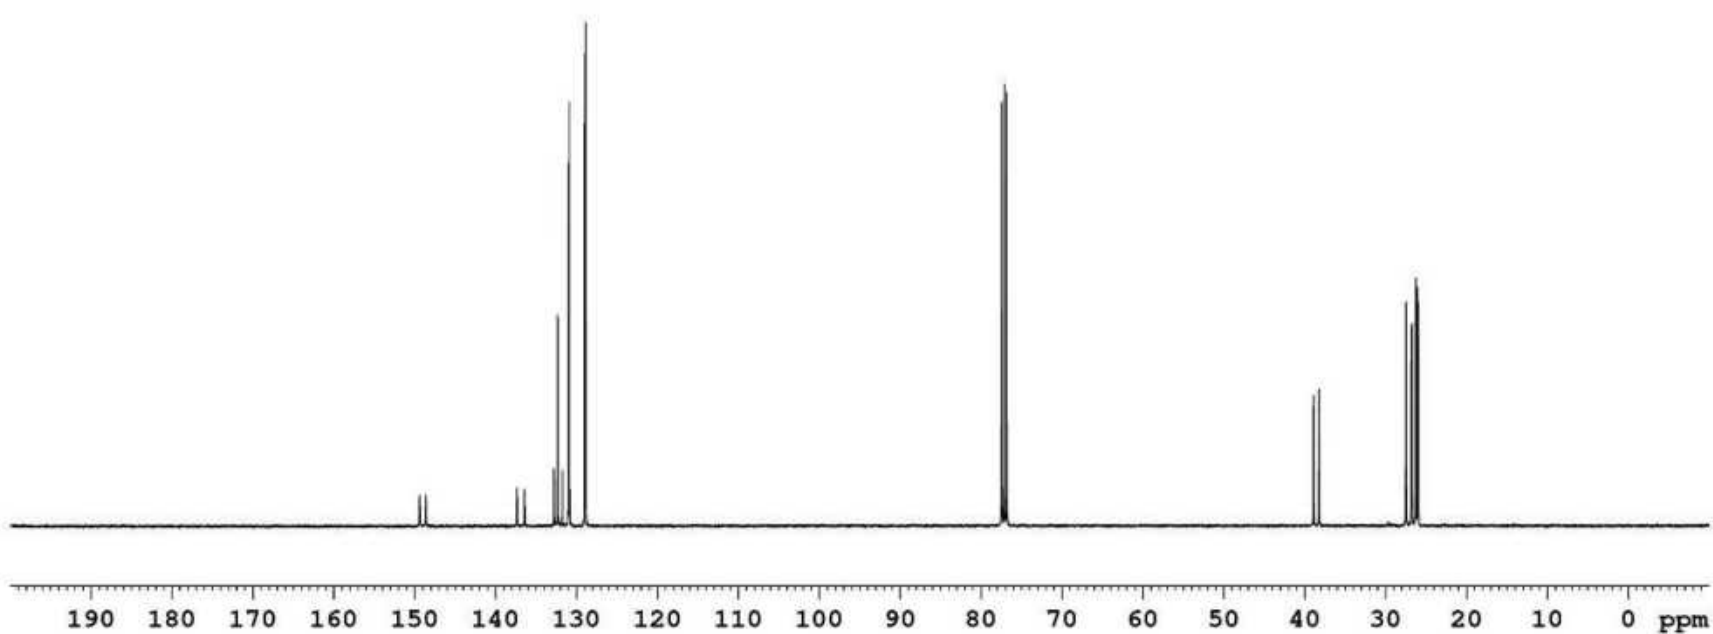

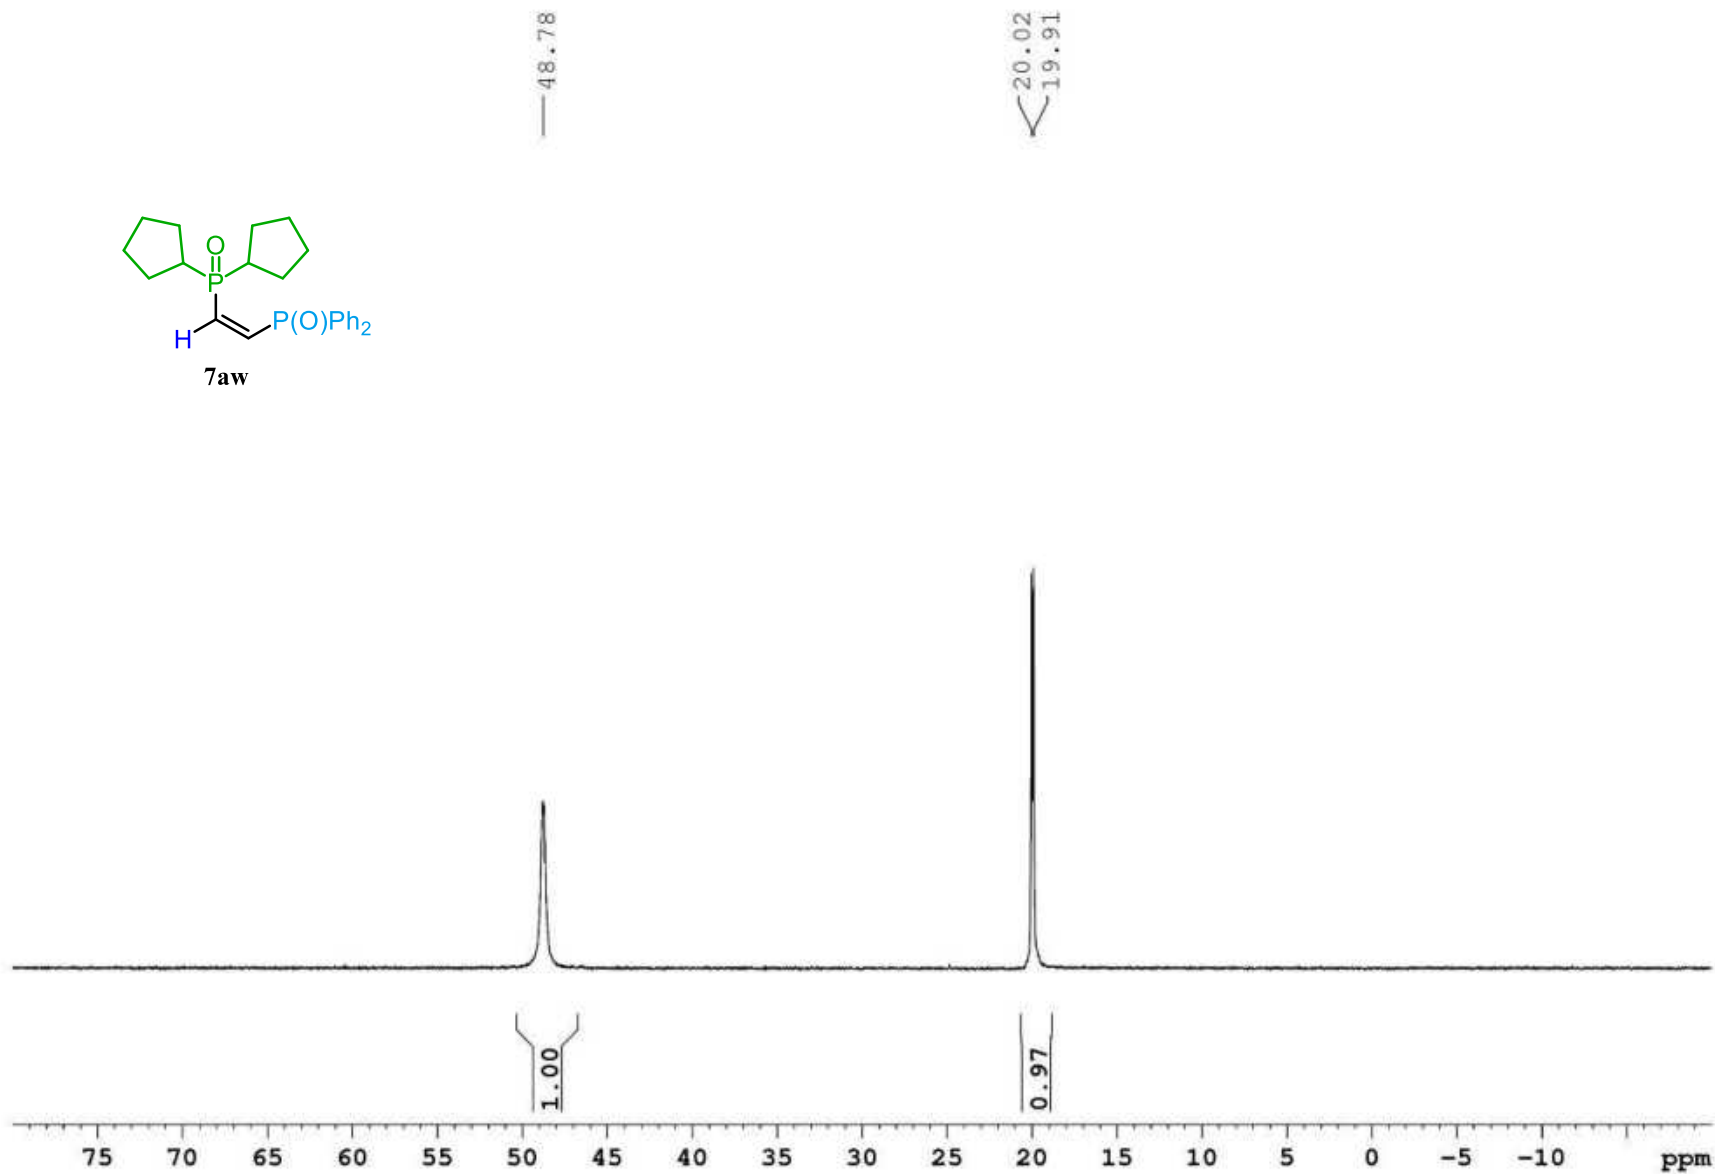

7.86  
7.84  
7.84  
7.83  
7.81  
7.81  
7.48  
7.46  
7.44  
7.44  
7.42  
7.42  
7.41  
7.40  
7.06  
7.02  
6.97  
6.97  
6.92  
6.88  
6.55  
6.51  
6.47  
6.45  
6.42  
6.38

3.16  
3.11  
3.09  
2.62  
2.19  
2.15  
2.13  
2.10  
1.99  
1.88  
1.86  
1.82  
1.79  
1.77  
1.74  
1.73  
1.68  
1.55  
1.55  
1.53  
1.52  
1.48  
1.46  
1.32  
1.24  
1.19  
1.15  
0.84

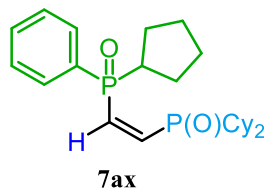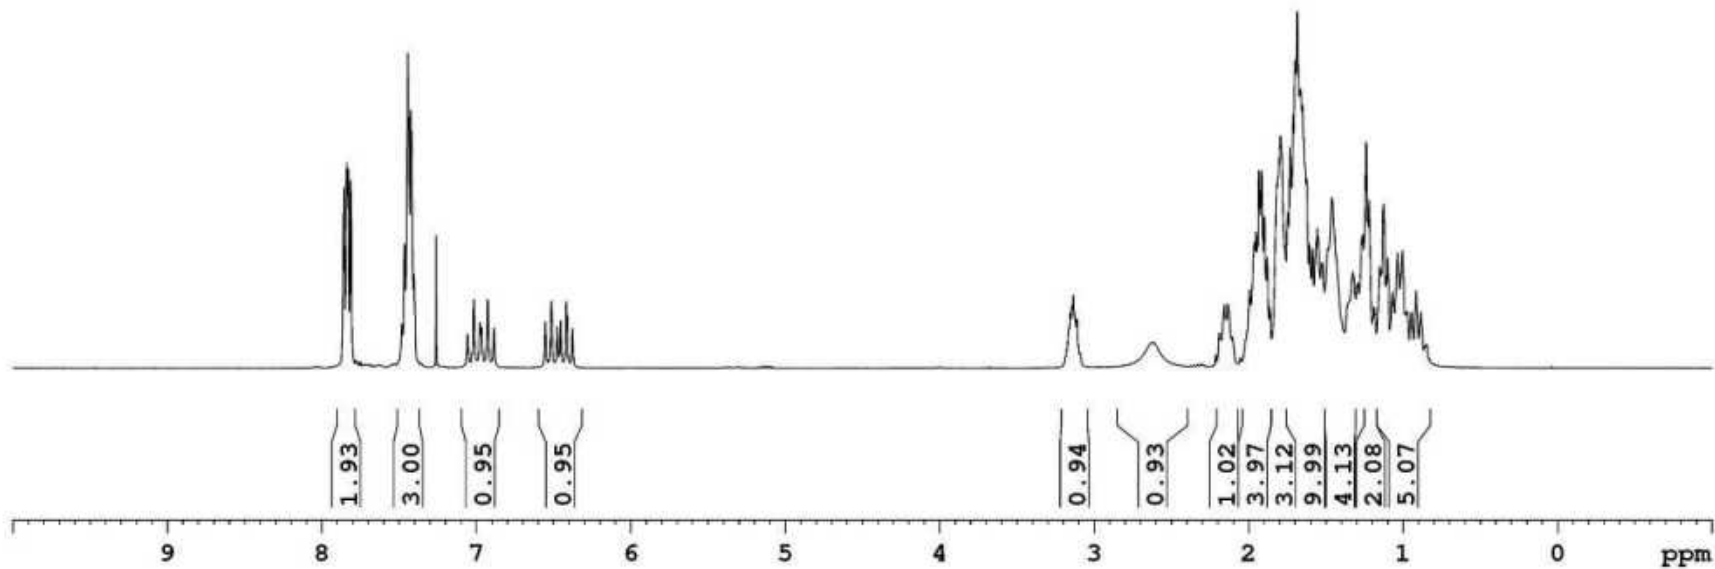

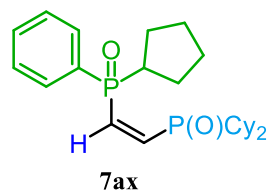

144.58  
143.73  
141.91  
141.17  
133.30  
132.34  
131.57  
131.55  
131.39  
131.30  
128.37  
128.25

37.78  
37.63  
37.03  
36.97  
36.37  
27.04  
26.95  
26.68  
26.59  
26.48  
26.44  
26.33  
26.31  
26.26  
26.24  
26.21  
26.19  
26.14  
26.11  
25.95  
25.92  
25.80  
25.65  
25.37  
25.34  
25.16  
25.12

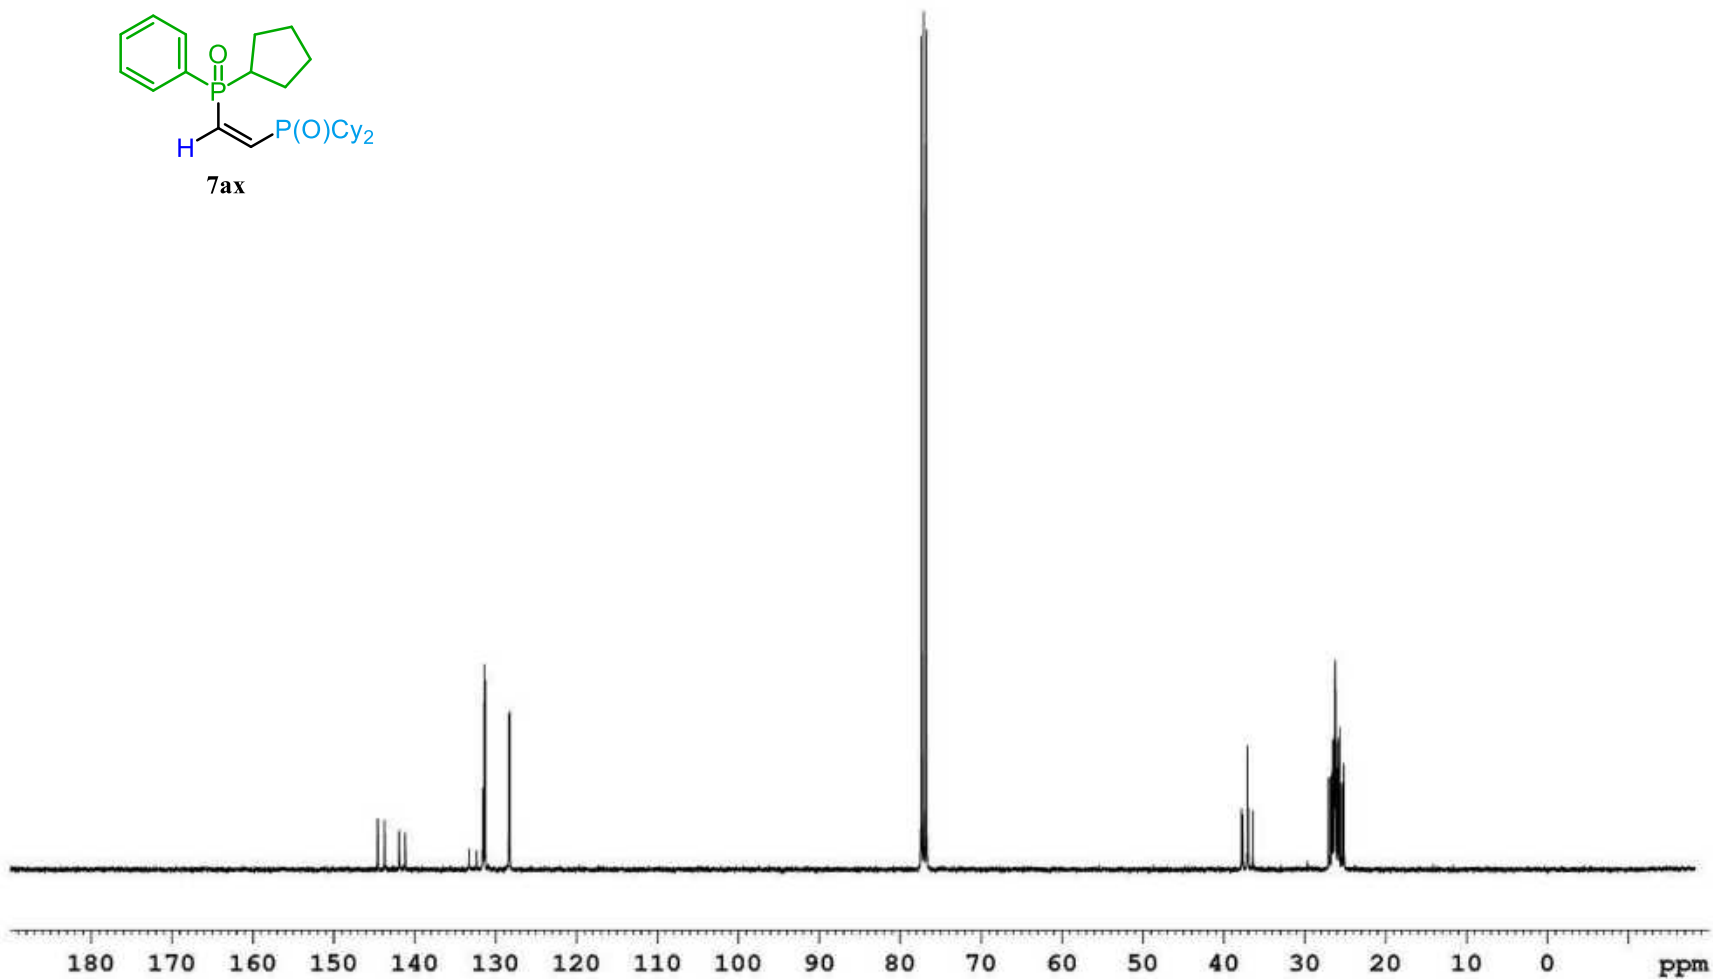





< 46.96  
< 46.87

< 33.59  
< 33.50

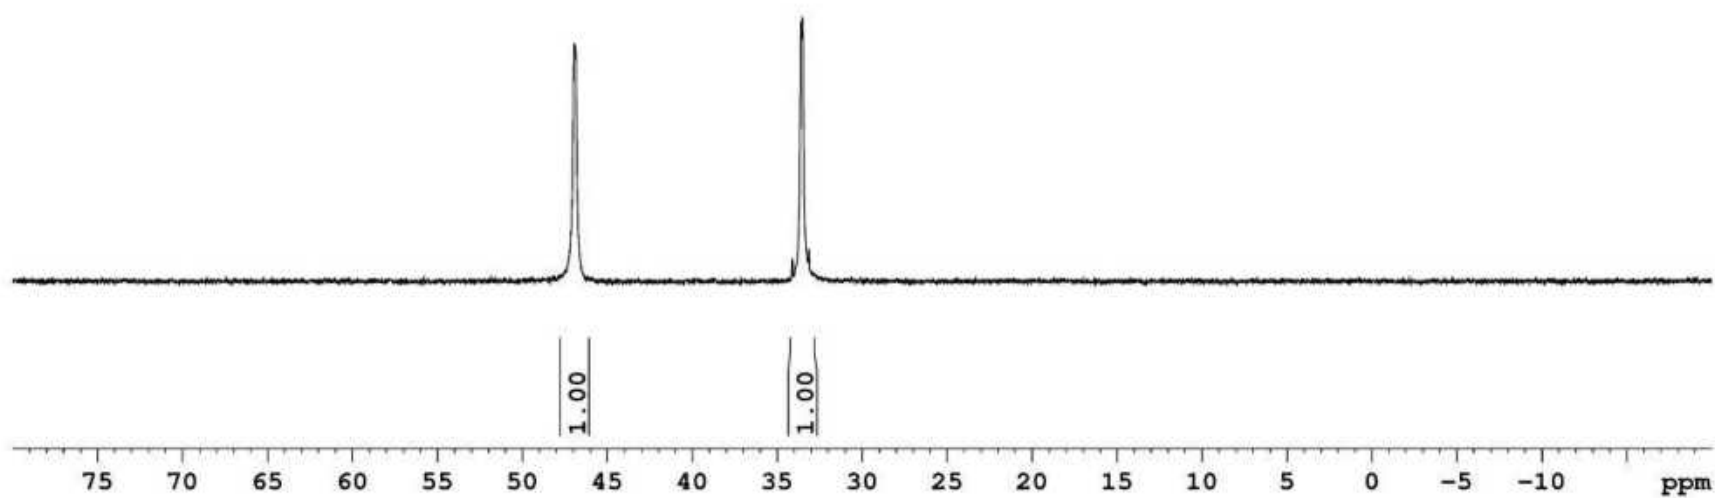

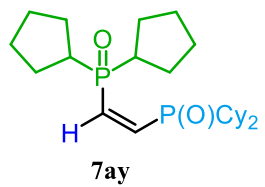

7.26  
6.95  
6.92  
6.85  
6.83  
6.81  
6.35  
6.31  
6.30  
6.26  
6.22  
6.21  
6.16

2.83  
2.77  
2.75  
2.74  
2.73  
1.87  
1.84  
1.83  
1.74  
1.68  
1.64  
1.62  
1.57  
1.52  
1.48  
1.46  
1.43  
1.41  
1.30  
1.27  
1.21  
1.16  
1.14  
1.12

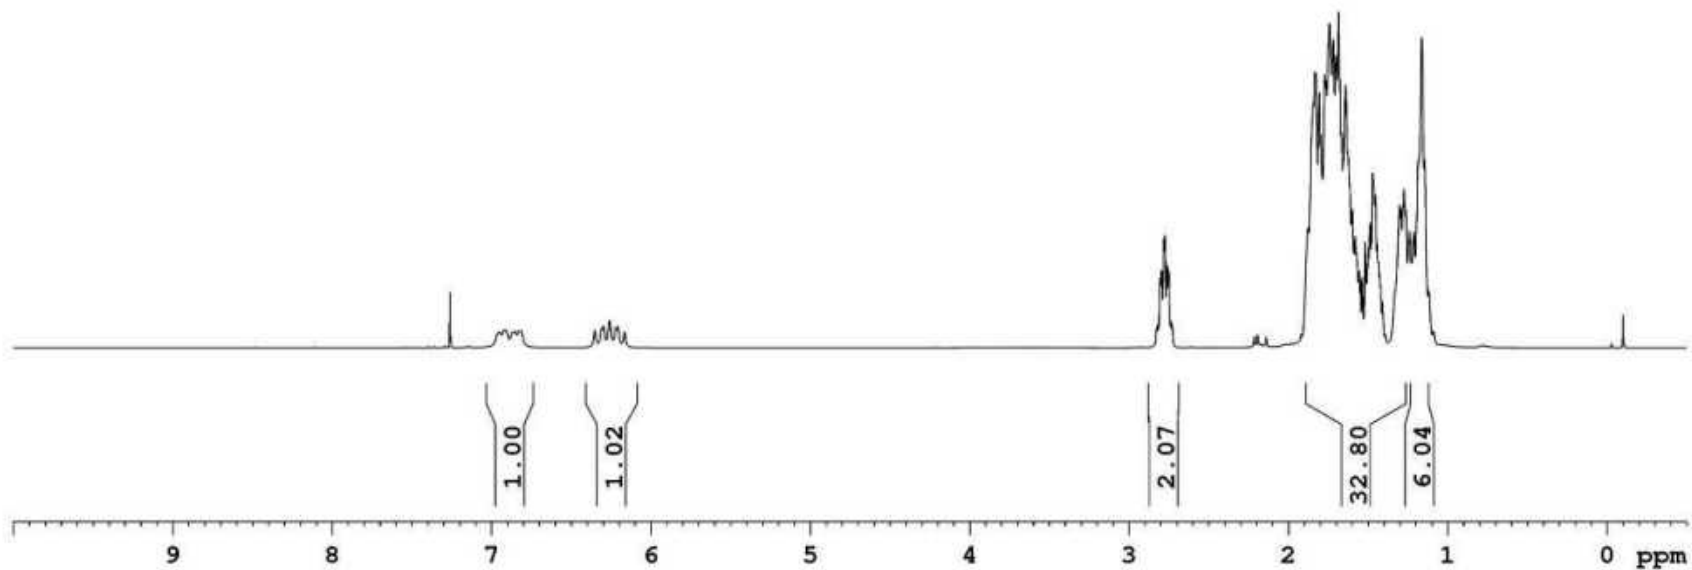



150.08  
149.32

137.32  
136.56

39.11  
38.42  
36.71  
36.04  
27.65  
27.62  
26.55  
26.45  
26.36  
26.35  
26.32  
26.18  
26.15  
26.12  
26.04  
25.94  
25.72  
25.71  
25.04  
25.01

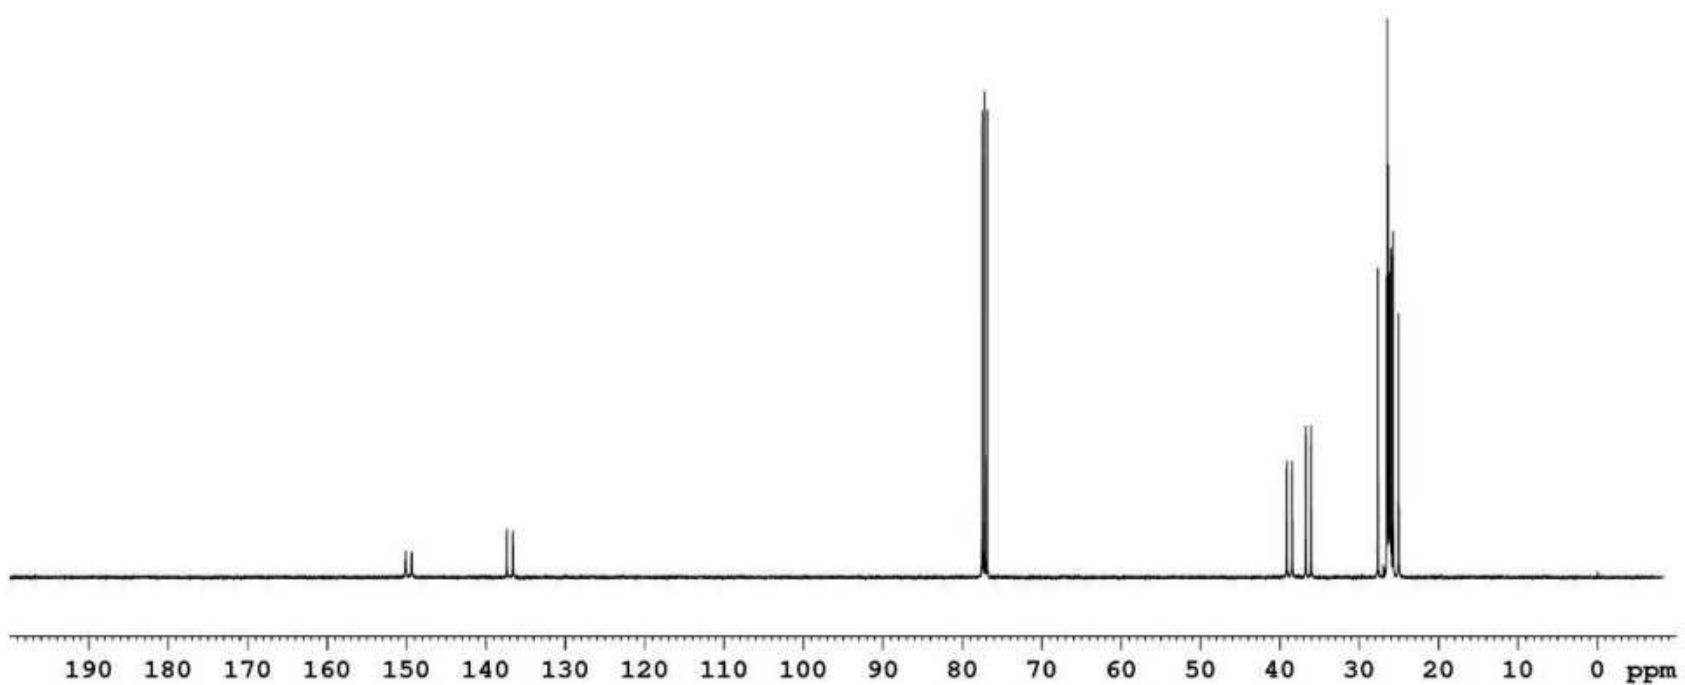



— 46.91  
— 44.52

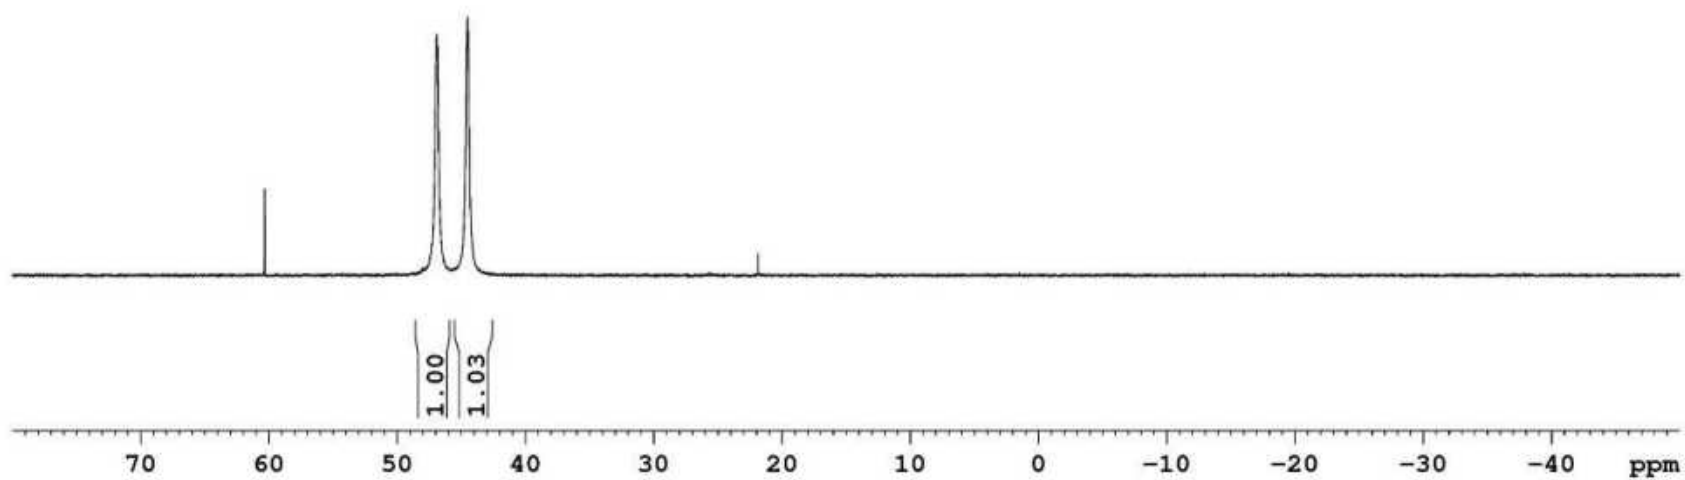

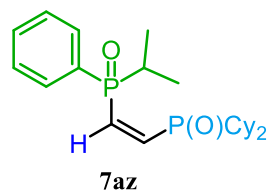

7.77  
7.72  
7.72  
7.44  
7.44  
7.37  
7.36  
7.00  
6.87  
6.82  
6.63  
6.50  
6.49  
6.45

2.76  
2.67  
2.22  
2.22  
2.14  
2.08  
2.00  
1.93  
1.88  
1.73  
1.59  
1.49  
1.45  
1.33  
1.15  
1.14  
1.07  
1.05  
1.01  
0.77

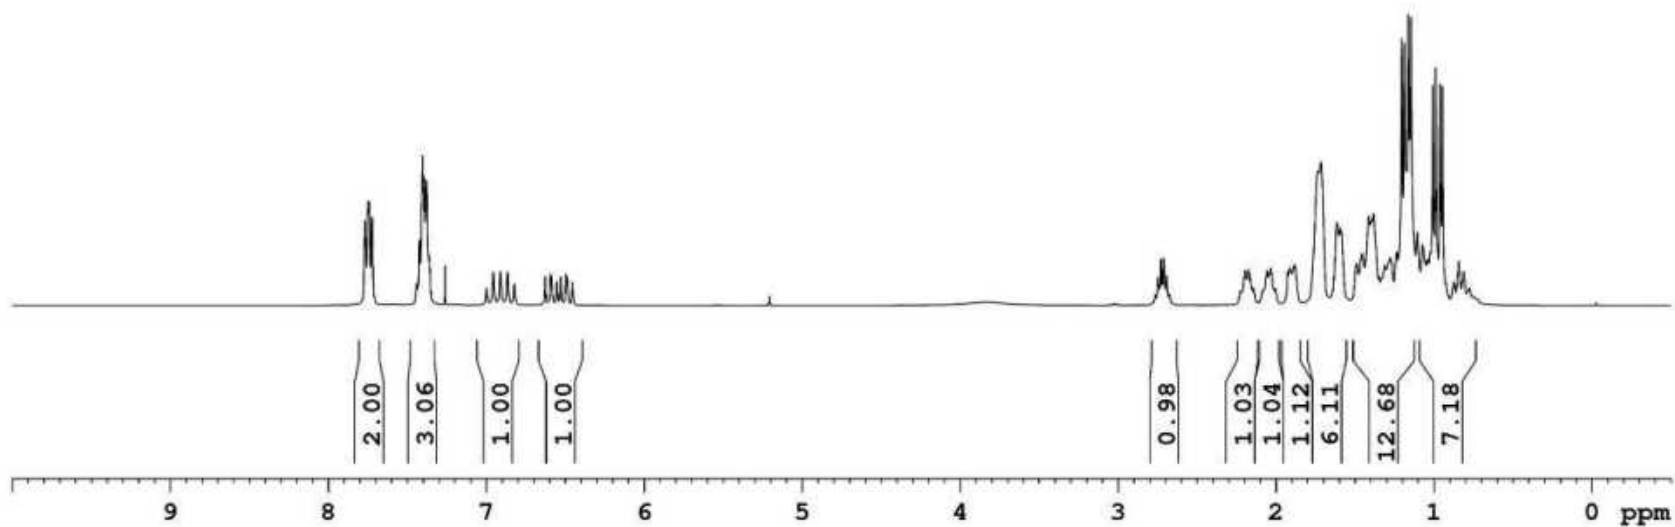



143.75  
143.01  
142.61  
141.77  
131.82  
131.72  
131.70  
131.23  
131.14  
130.87  
128.49  
128.38

37.80  
37.14  
37.05  
36.39  
28.45  
27.73  
26.36  
26.27  
26.22  
26.18  
26.14  
26.05  
25.97  
25.94  
25.74  
25.59  
25.43  
25.40  
25.29  
25.26  
15.29  
15.26  
14.91  
14.89

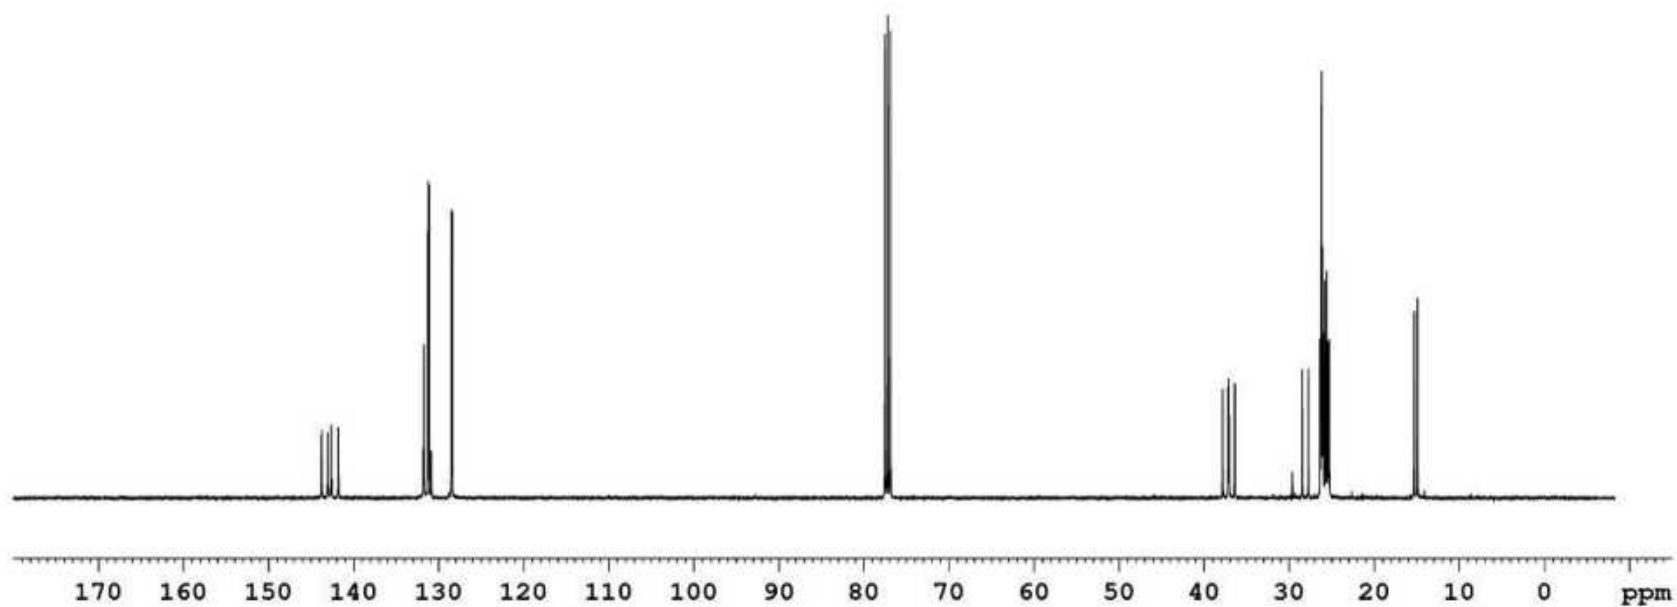



— 47.94

< 35.37  
35.30

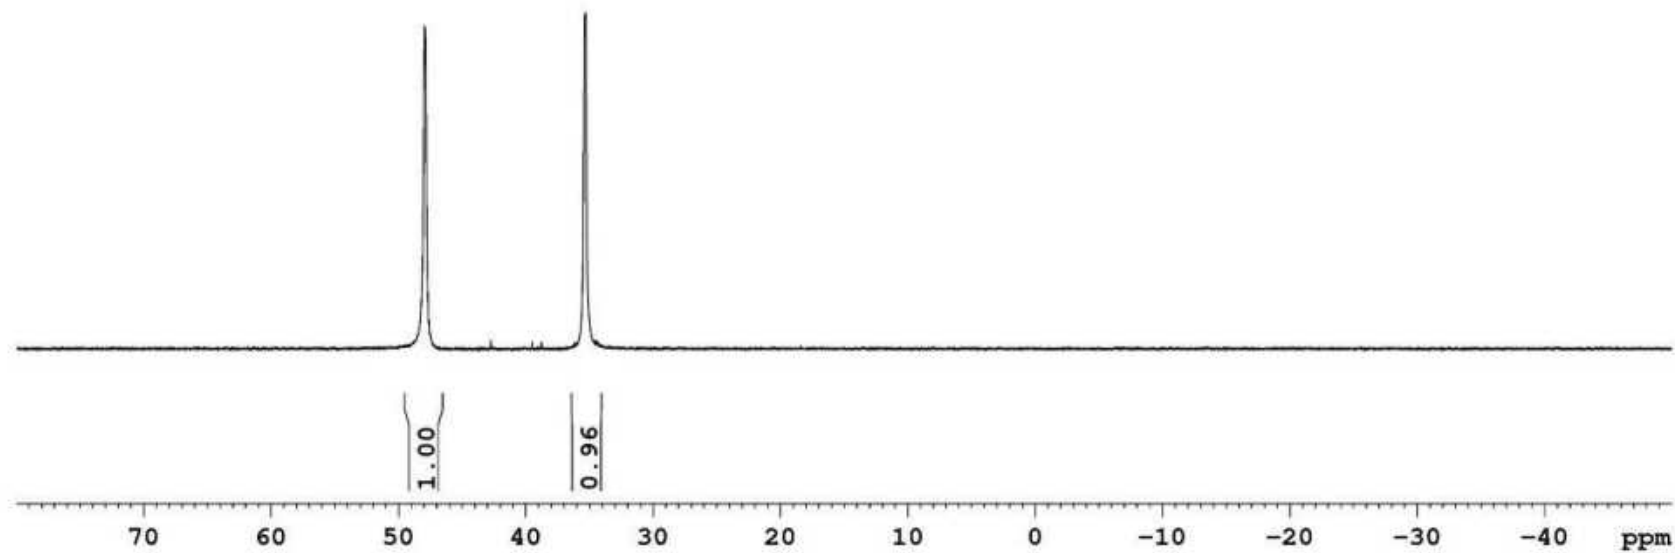

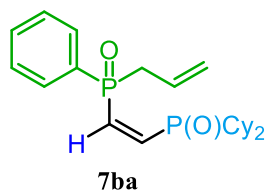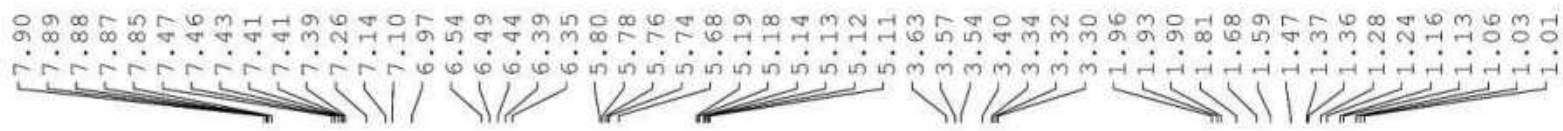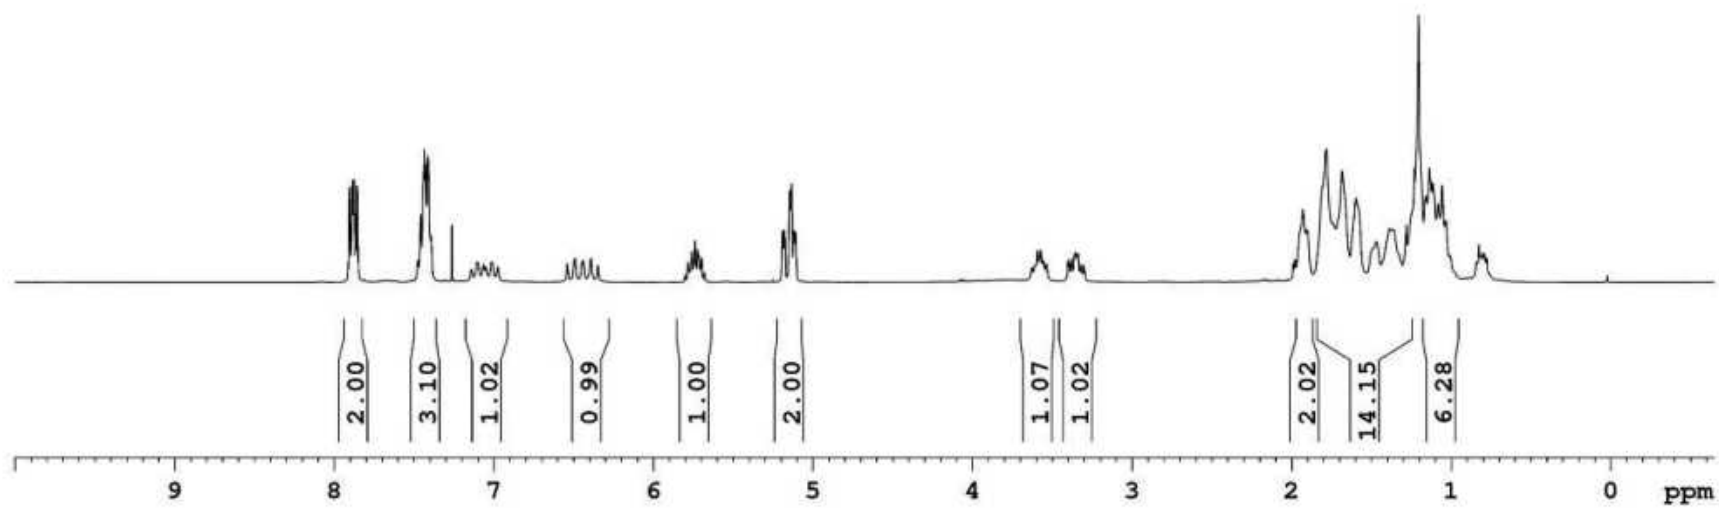



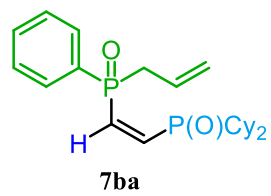

146.33  
145.46  
140.02  
139.28  
132.81  
131.77  
131.40  
131.30  
128.36  
128.24  
127.08  
126.98  
121.18  
121.05

36.85  
36.54  
36.52  
36.17  
35.87  
35.84  
26.44  
26.32  
26.28  
26.23  
26.19  
26.15  
26.10  
25.85  
25.82  
25.74  
25.65  
25.08  
25.05  
24.80  
24.76

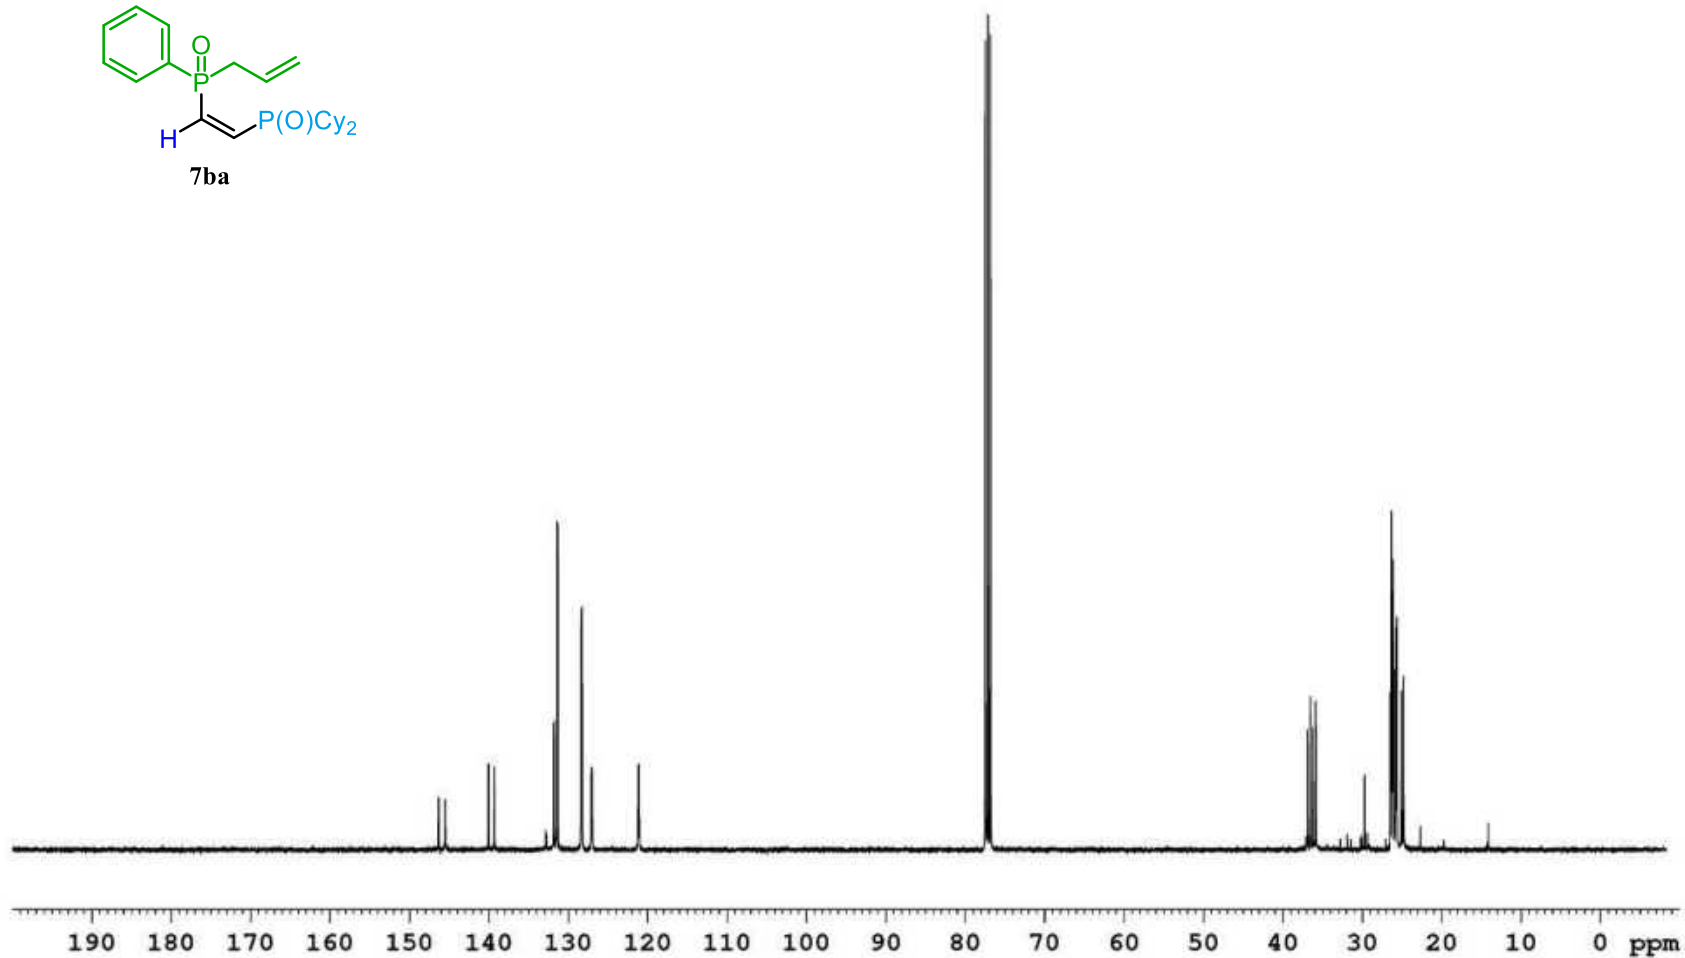

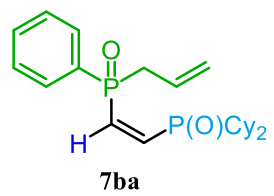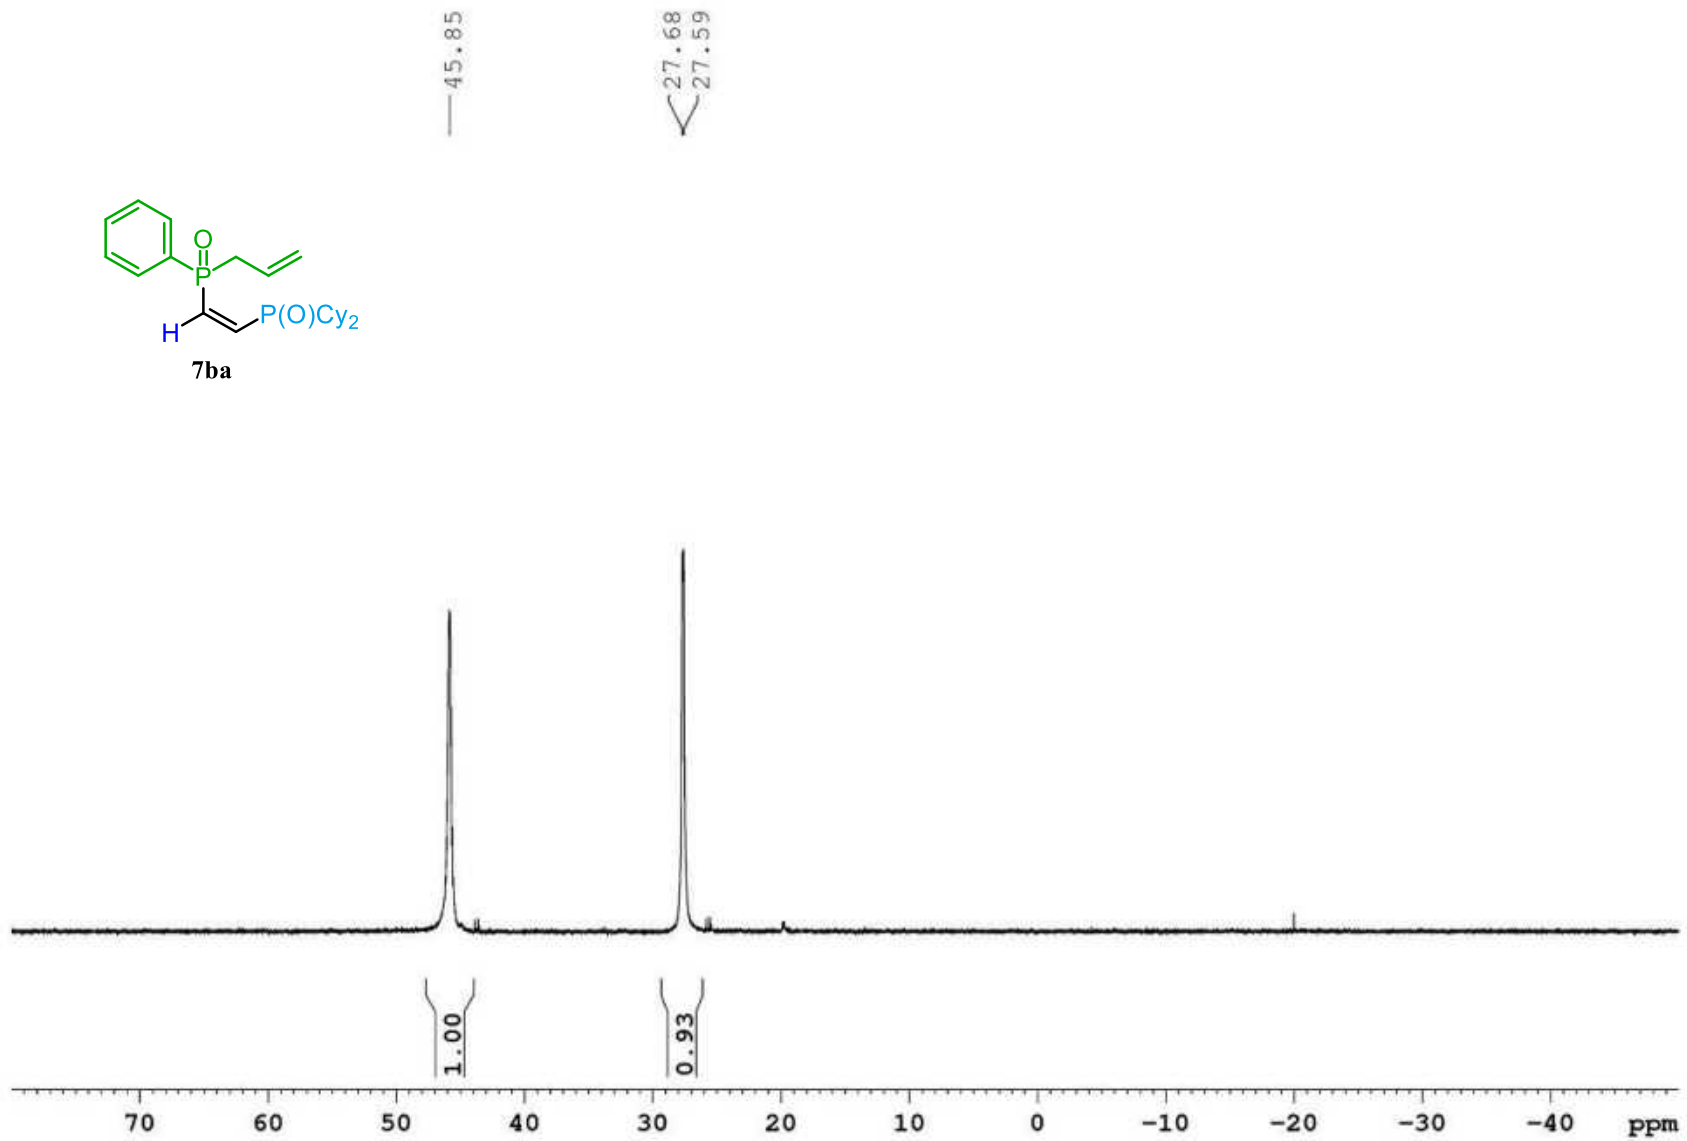

7.88  
7.86  
7.84  
7.82  
7.61  
7.59  
7.58  
7.56  
7.48  
7.46  
7.45  
7.41  
7.40  
7.39  
7.38  
7.37  
7.36  
7.31  
7.30  
7.29  
7.28  
7.26  
7.24  
7.22  
7.21  
7.20  
7.19  
7.18  
7.17  
7.15  
7.13  
7.12  
7.10  
7.09  
7.04  
6.99  
6.94  
6.90

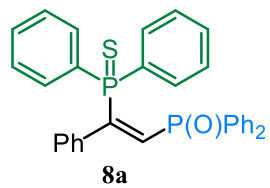

7.88  
7.86  
7.84  
7.82  
7.61  
7.59  
7.58  
7.56  
7.46  
7.45  
7.41  
7.40  
7.39  
7.38  
7.37  
7.36  
7.31  
7.30  
7.29  
7.28  
7.26  
7.24  
7.22  
7.21  
7.20  
7.19  
7.18  
7.17  
7.15  
7.13  
7.12  
7.10  
7.04  
6.99  
6.94  
6.90

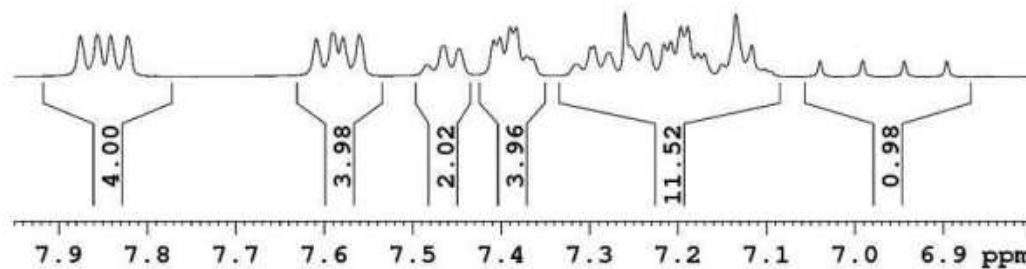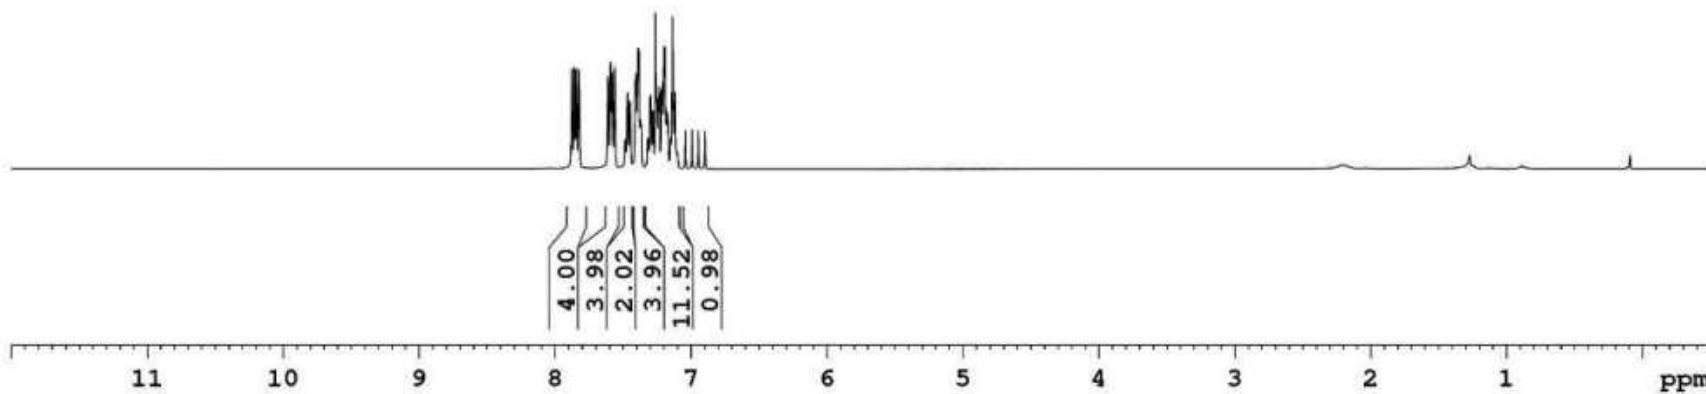

157.65  
156.99  
141.83  
141.73  
141.67  
141.56  
137.73  
137.64  
136.81  
136.72  
134.08  
133.02  
133.01  
132.42  
132.31  
132.15  
131.67  
131.65  
131.04  
131.00  
130.90  
128.62  
128.50  
128.12  
128.00  
127.96  
127.87  
127.74



— 134.08

∨ 133.02  
133.01

∨ 132.42  
— 132.31  
— 132.15

∨ 131.67  
131.65

∨ 131.04  
131.00  
130.90

∨ 128.62  
128.50

∨ 128.12  
128.00  
127.96  
127.87  
127.74

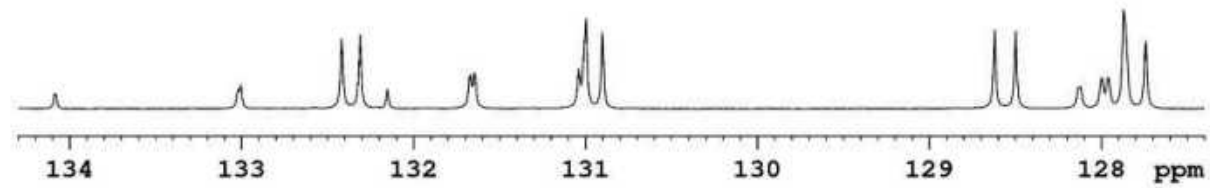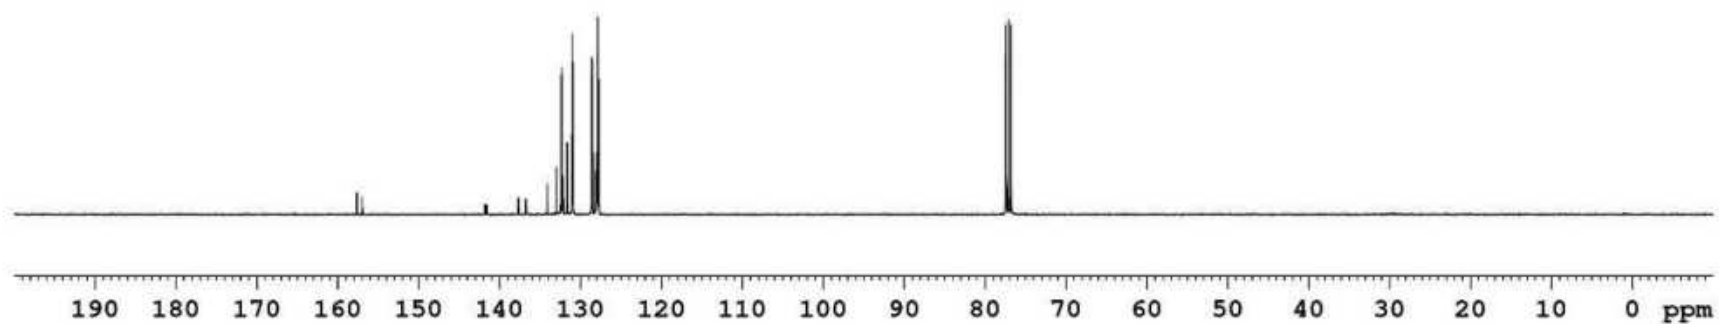

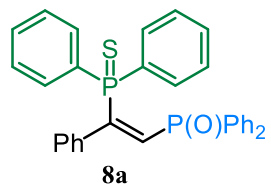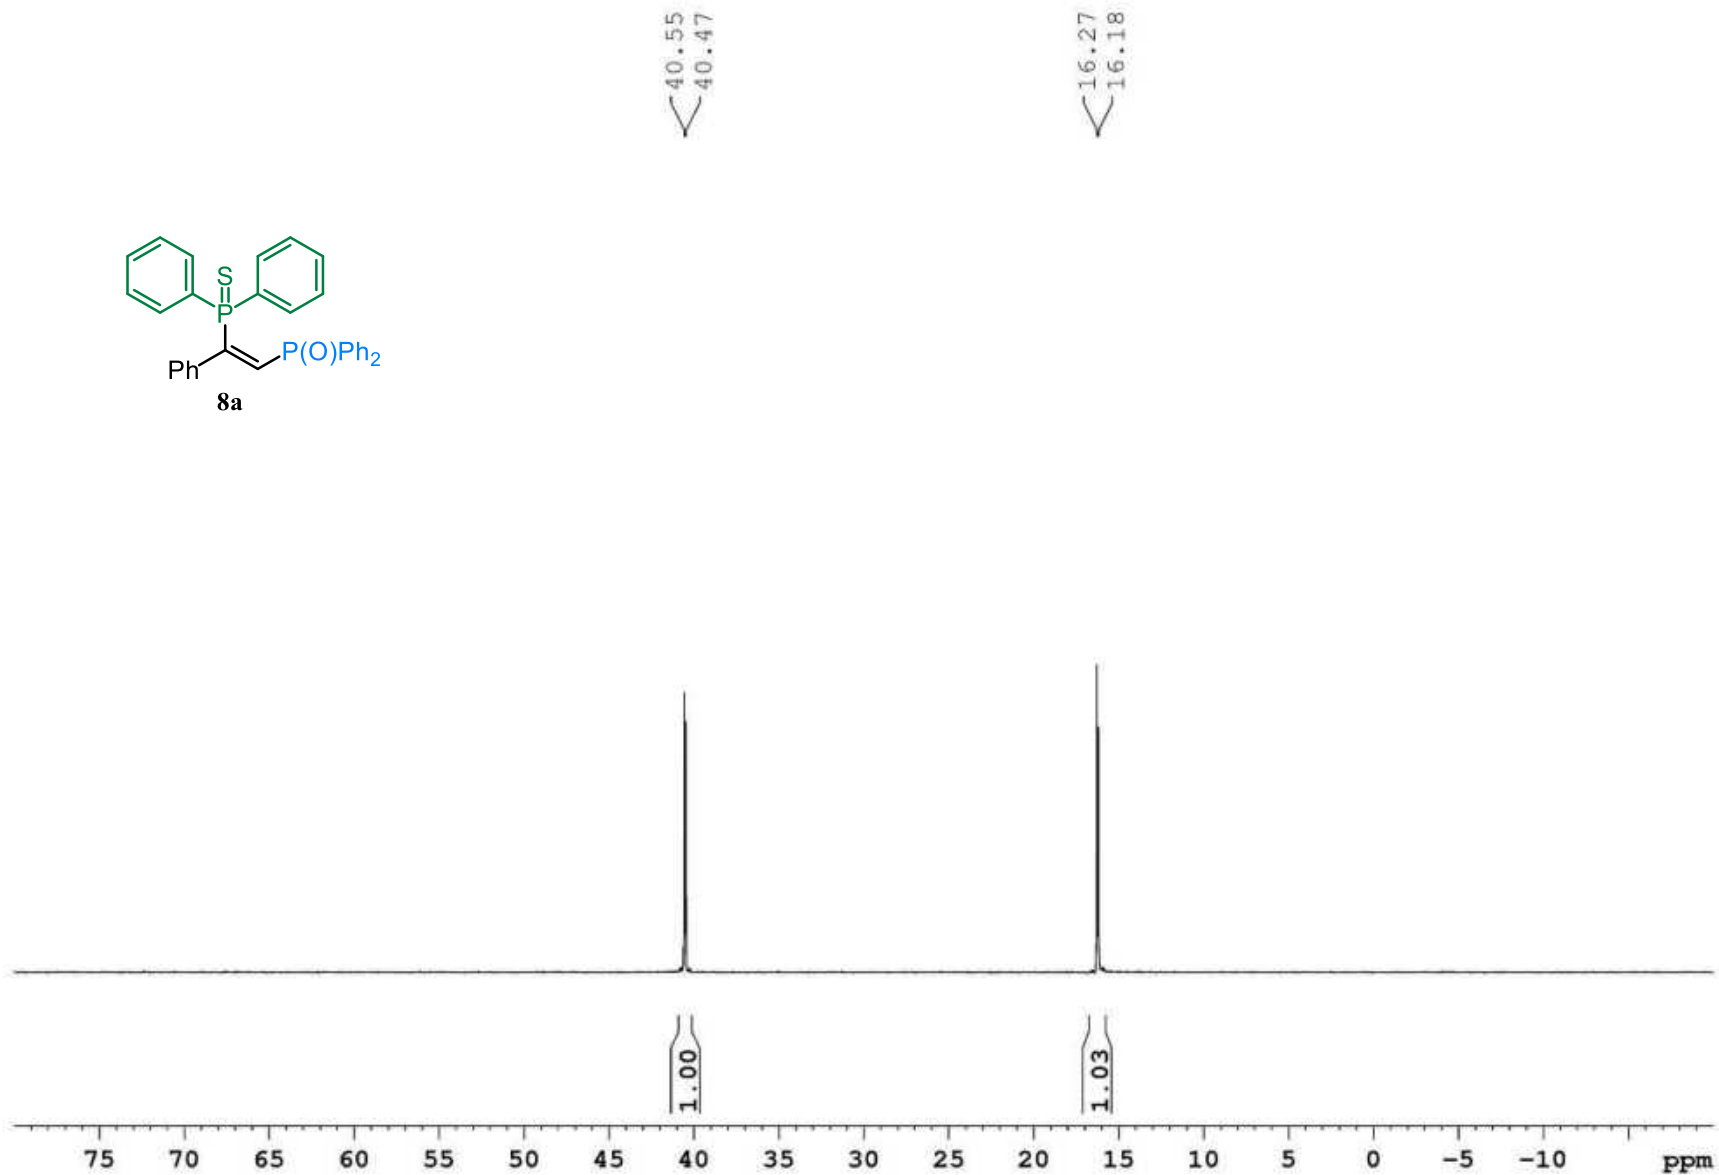

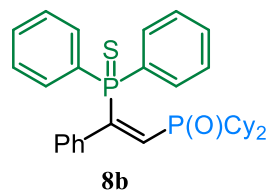

7.90  
7.88  
7.87  
7.85  
7.35  
7.33  
7.32  
7.32  
7.30  
7.29  
7.12  
6.47  
6.42  
6.37  
6.32

1.87  
1.81  
1.69  
1.47  
1.44  
1.40  
1.35  
1.27  
1.22  
1.21  
1.14

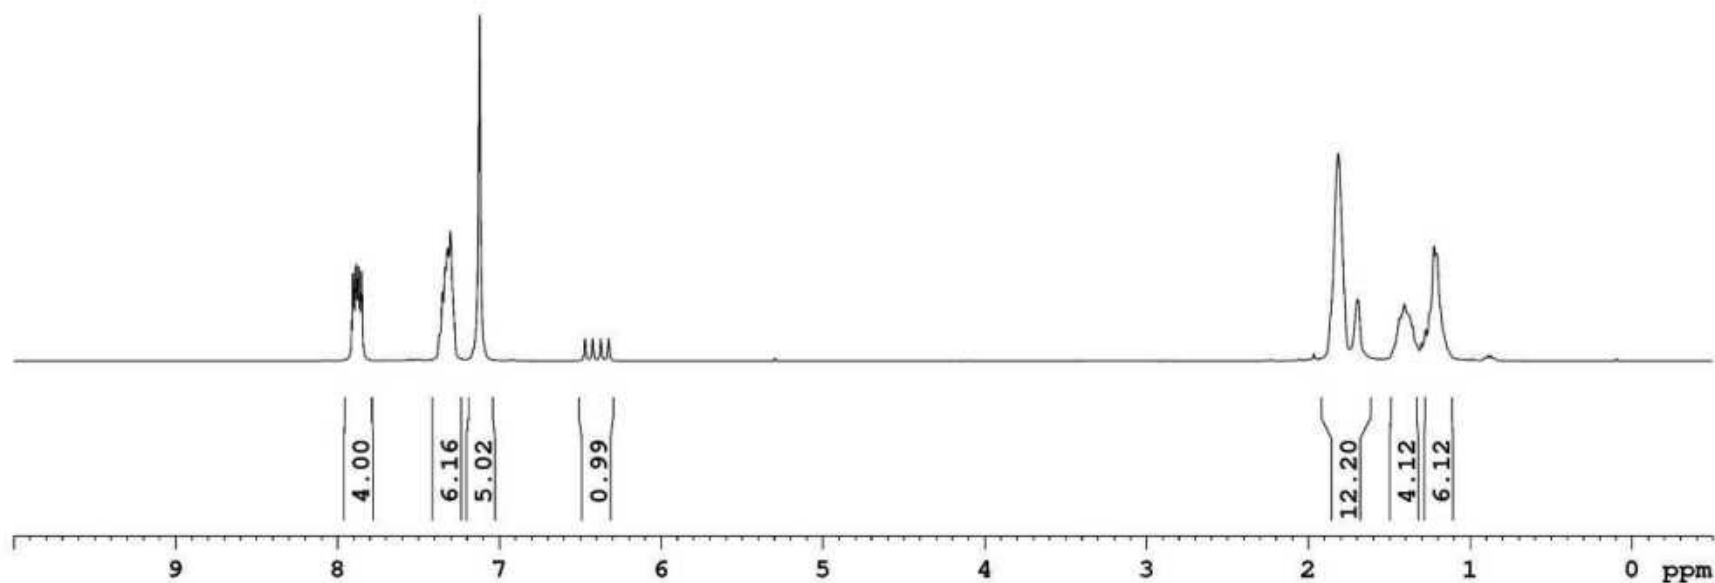



158.61  
157.94  
142.42  
142.32  
142.28  
142.18  
138.23  
138.12  
137.49  
137.39  
134.07  
133.22  
132.24  
132.13  
130.87  
130.85  
127.87  
127.77  
127.65

37.94  
37.26  
26.71  
26.59  
26.55  
26.49  
26.46  
26.42  
25.89  
25.81  
25.79

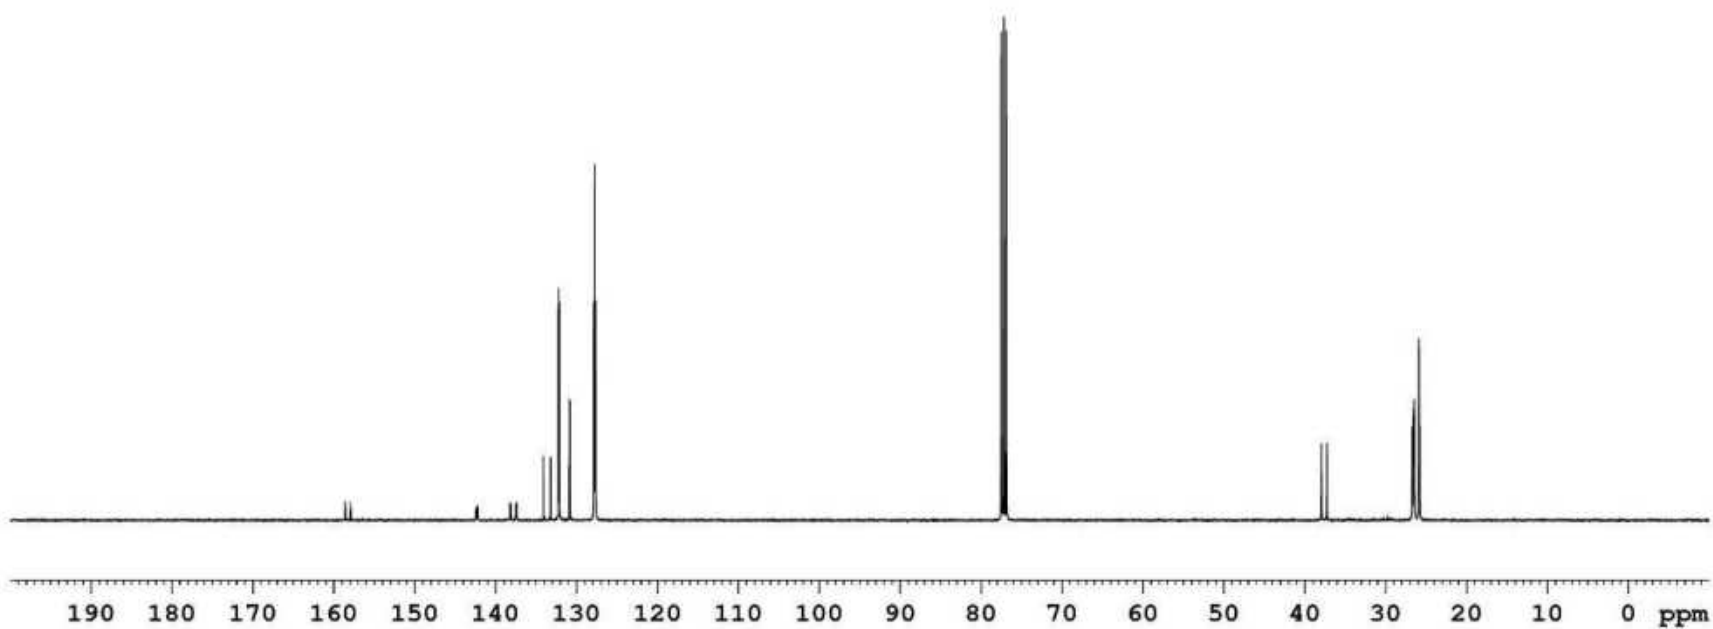



40.21  
39.45  
39.38

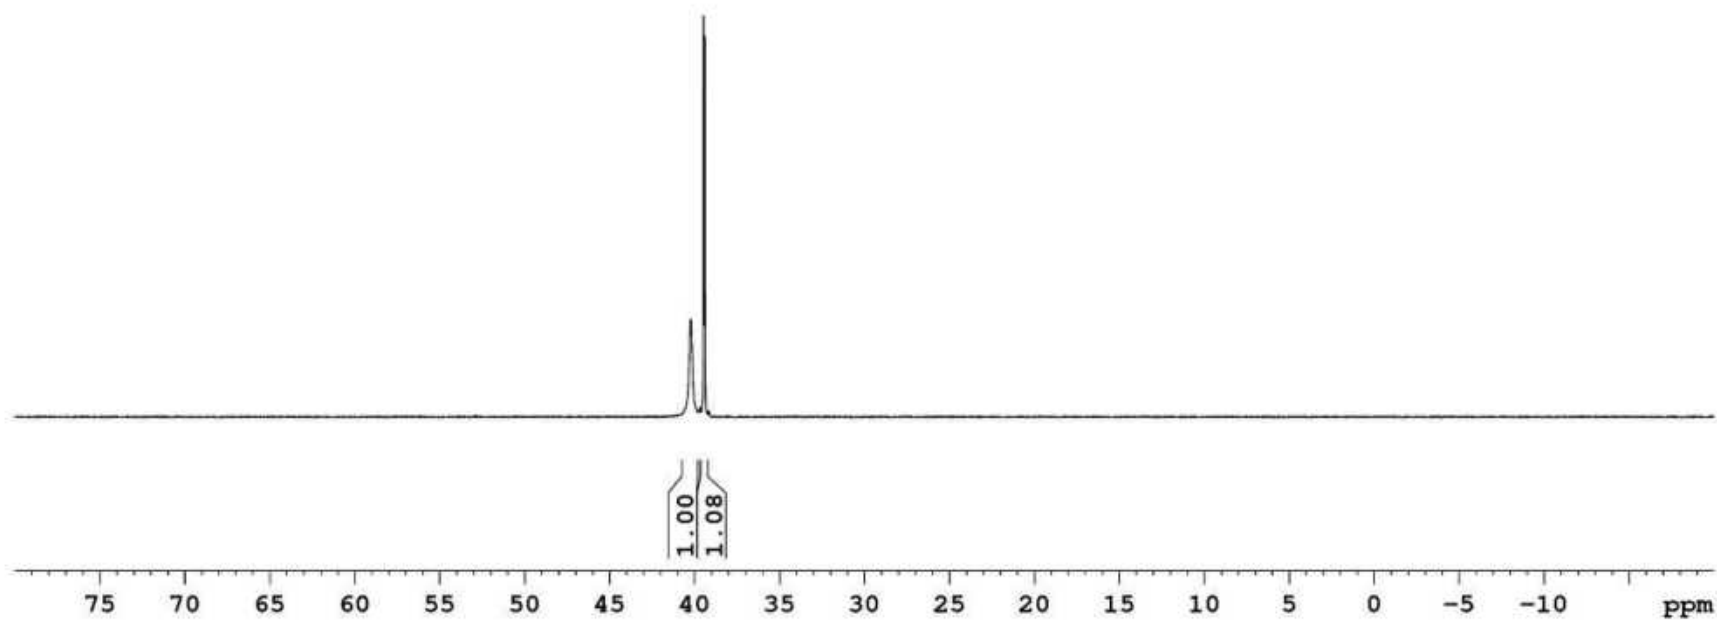



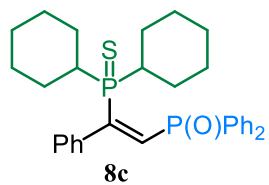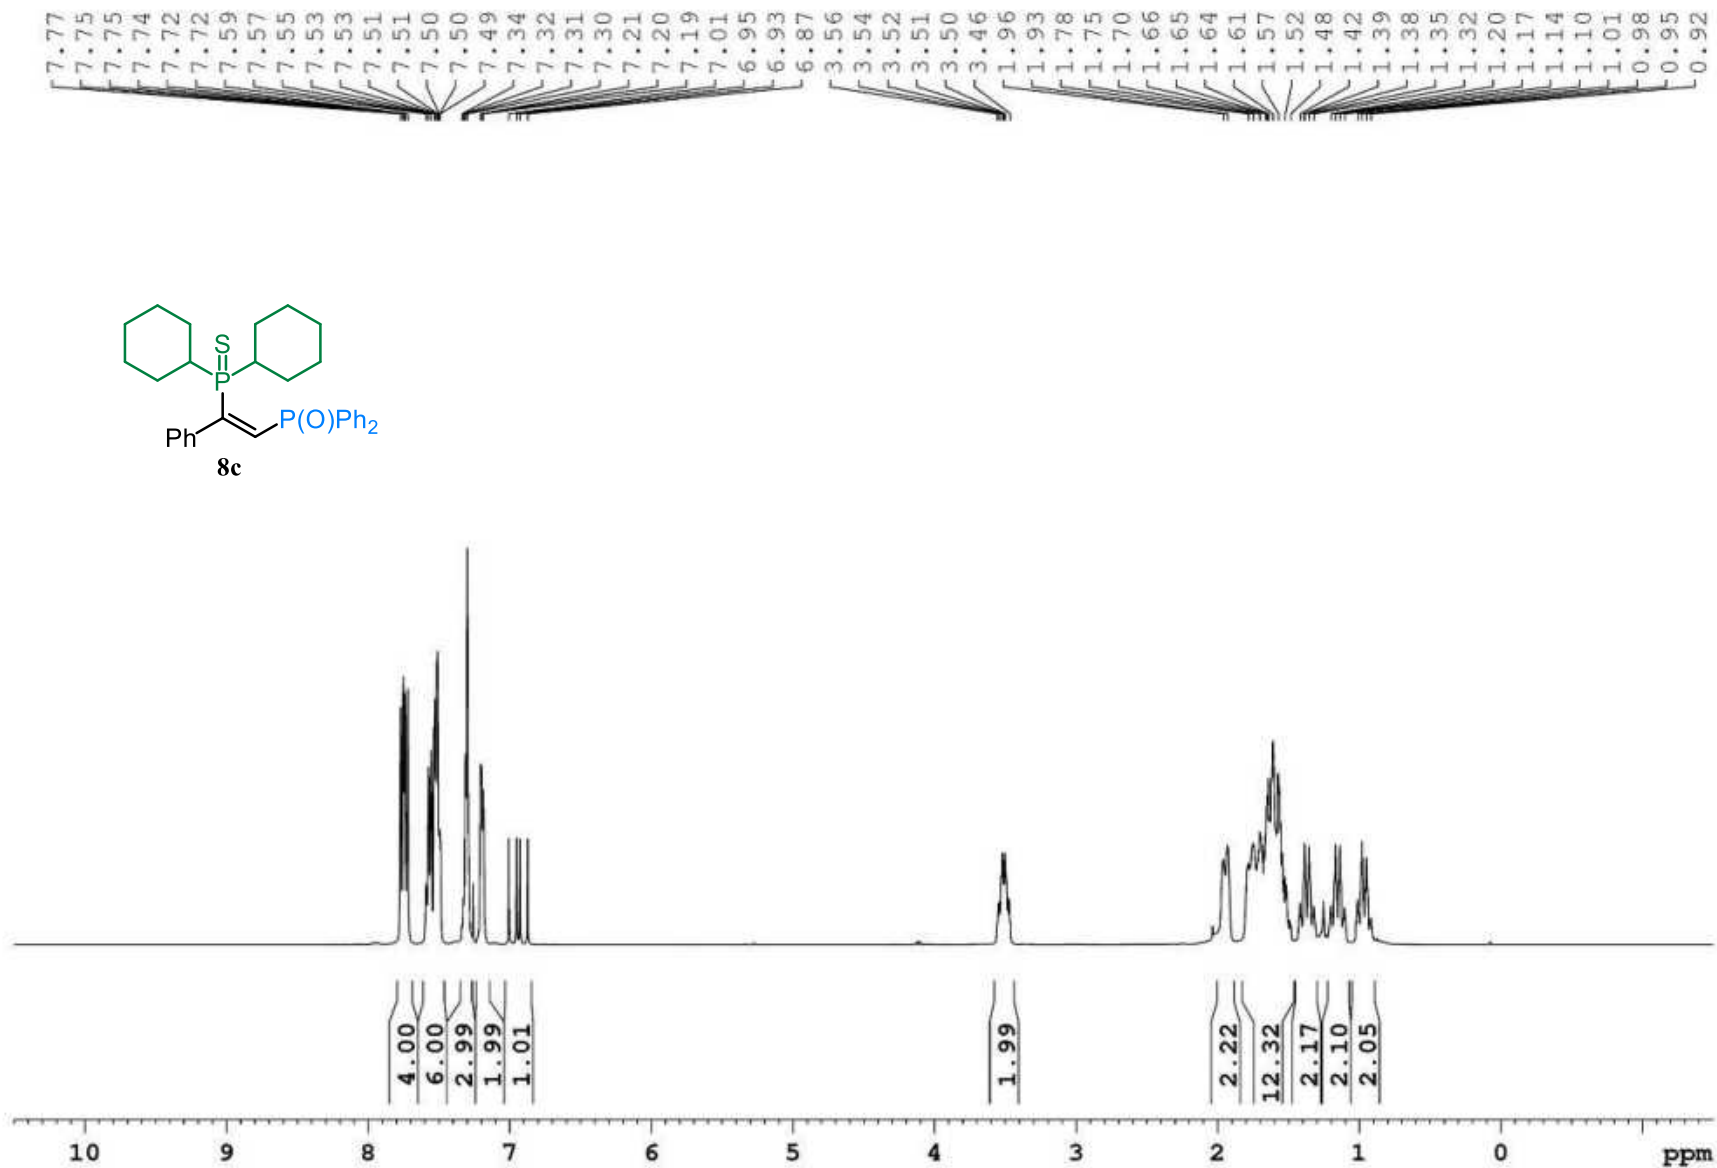

157.06  
156.62  
142.84  
142.76  
142.67  
142.59  
134.30  
134.23  
133.45  
133.39  
133.31  
132.36  
132.34  
130.91  
130.82  
129.13  
129.01  
128.69  
128.66  
128.00  
127.27

40.69  
40.23  
27.77  
27.75  
27.29  
27.27  
26.24  
26.11  
25.97  
25.63

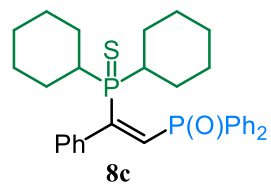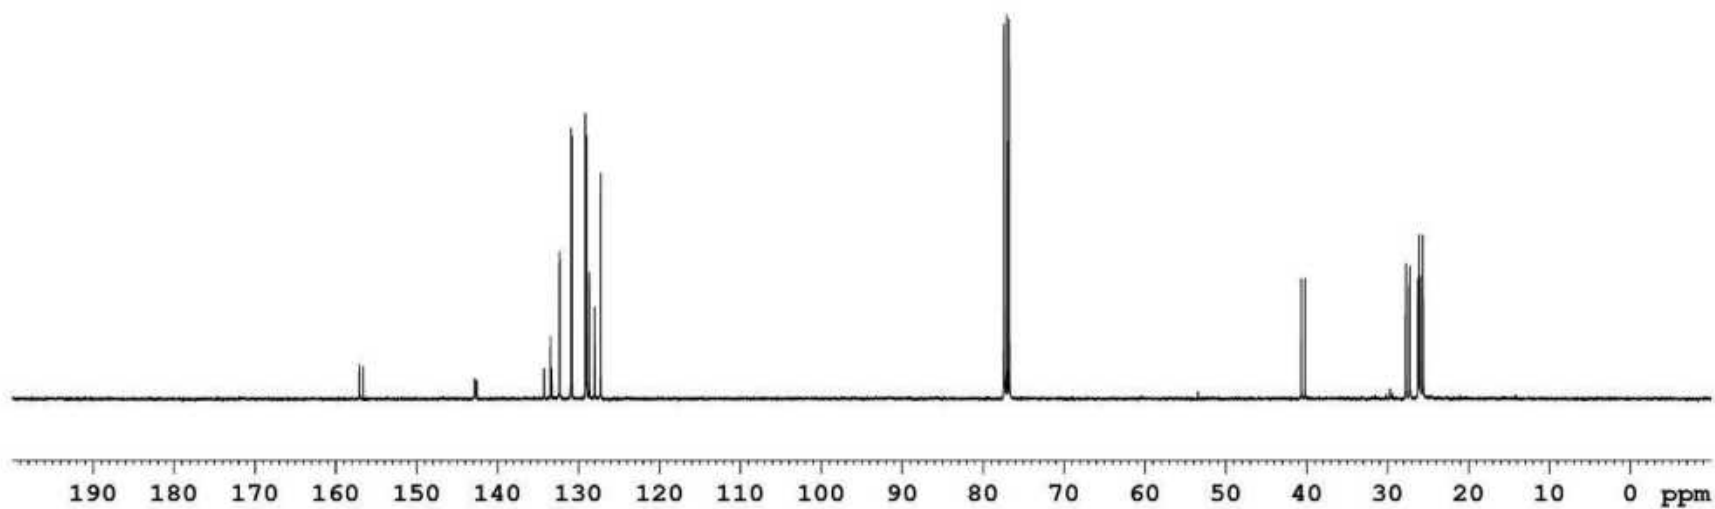

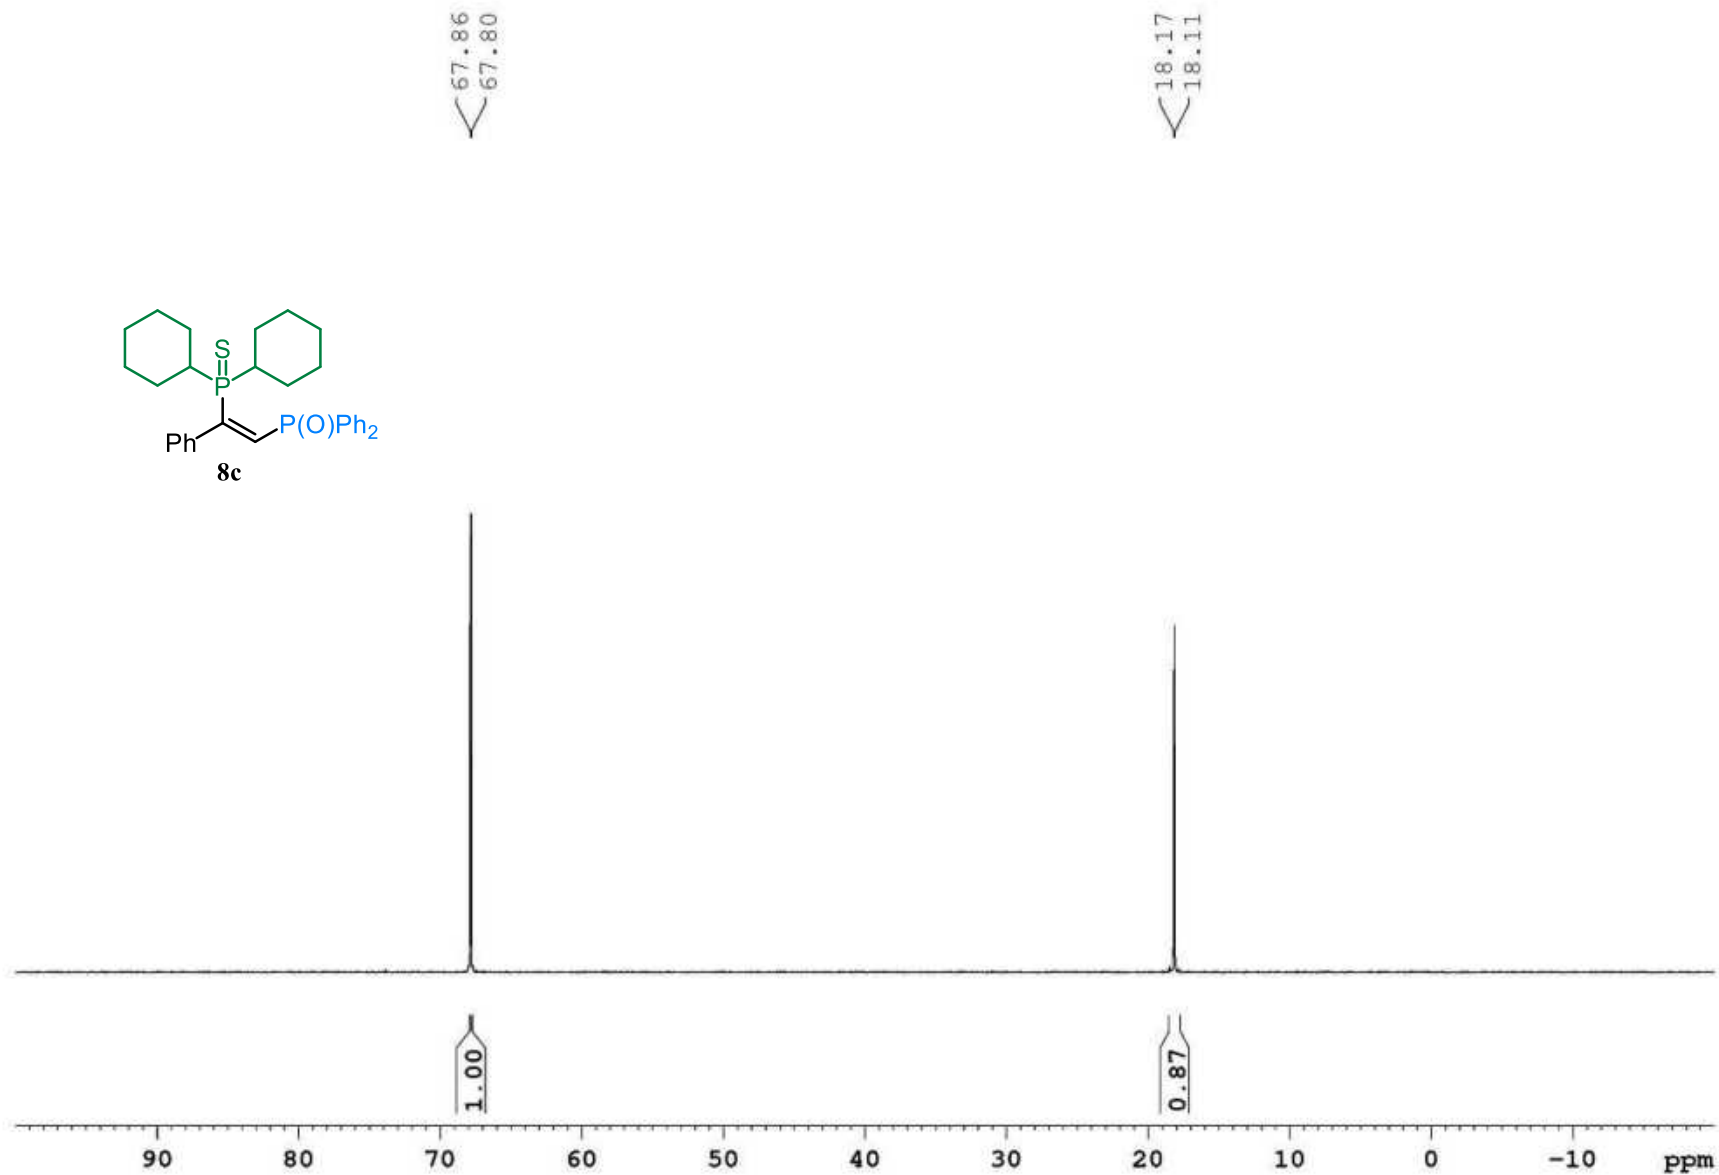

7.78  
7.76  
7.76  
7.75  
7.73  
7.60  
7.58  
7.58  
7.57  
7.56  
7.55  
7.54  
7.53  
7.52  
7.51  
7.51  
7.50  
7.28  
7.28  
7.22  
7.21  
7.21  
7.20  
7.11  
7.10  
7.05  
6.99  
6.92

3.56  
3.53  
3.51  
3.48  
1.97  
1.94  
1.78  
1.76  
1.72  
1.71  
1.63  
1.60  
1.57  
1.49  
1.42  
1.39  
1.32  
1.20  
1.17  
1.10  
0.98  
0.88

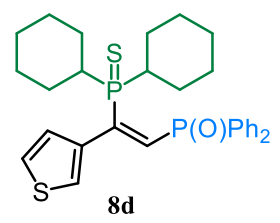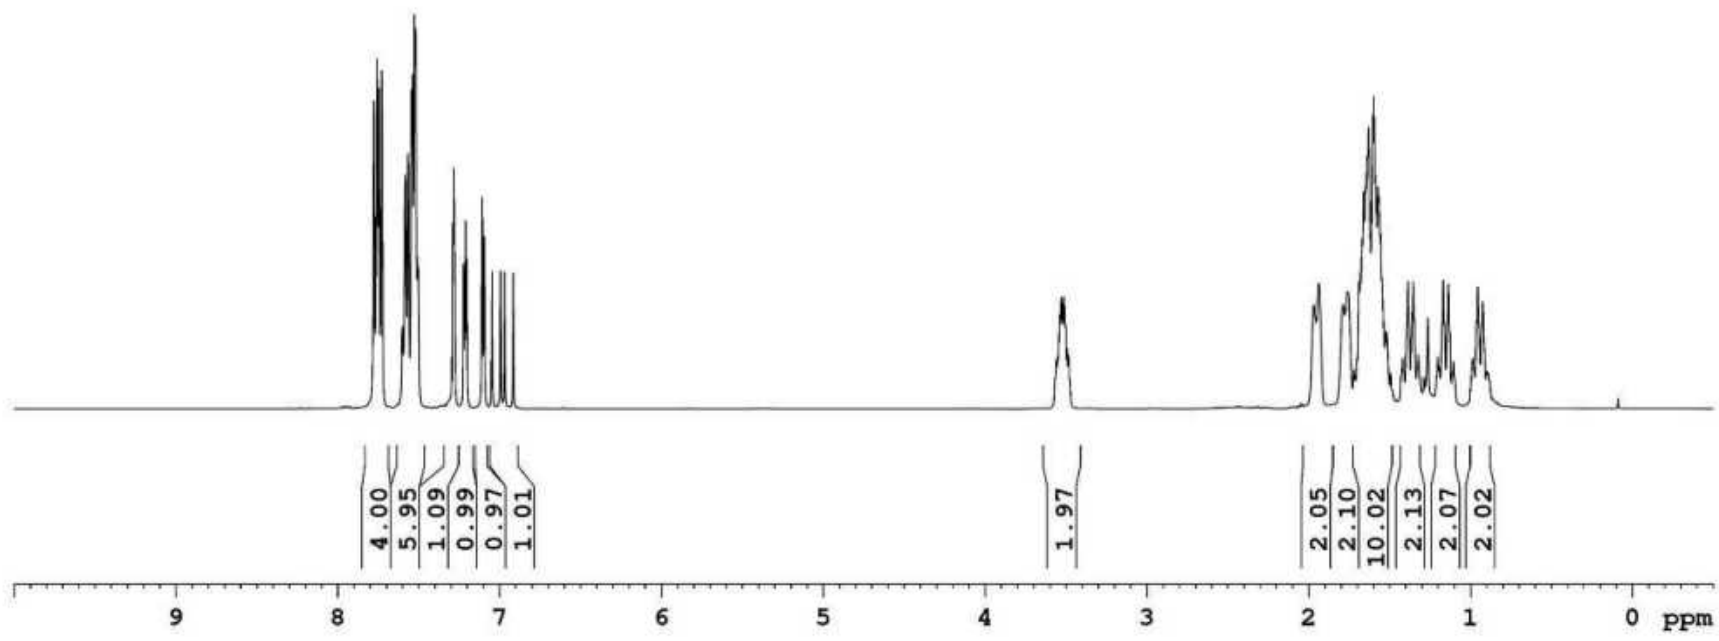

152.14  
151.68  
143.06  
142.97  
142.88  
142.80  
133.42  
133.35  
132.51  
132.43  
132.39  
132.36  
130.90  
130.81  
129.15  
129.03  
124.86  
124.81  
123.93

40.64  
40.18  
27.62  
27.60  
27.06  
27.03  
26.16  
26.06  
26.02  
25.92  
25.62

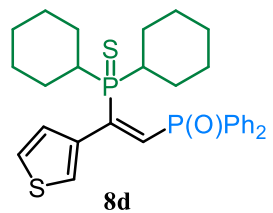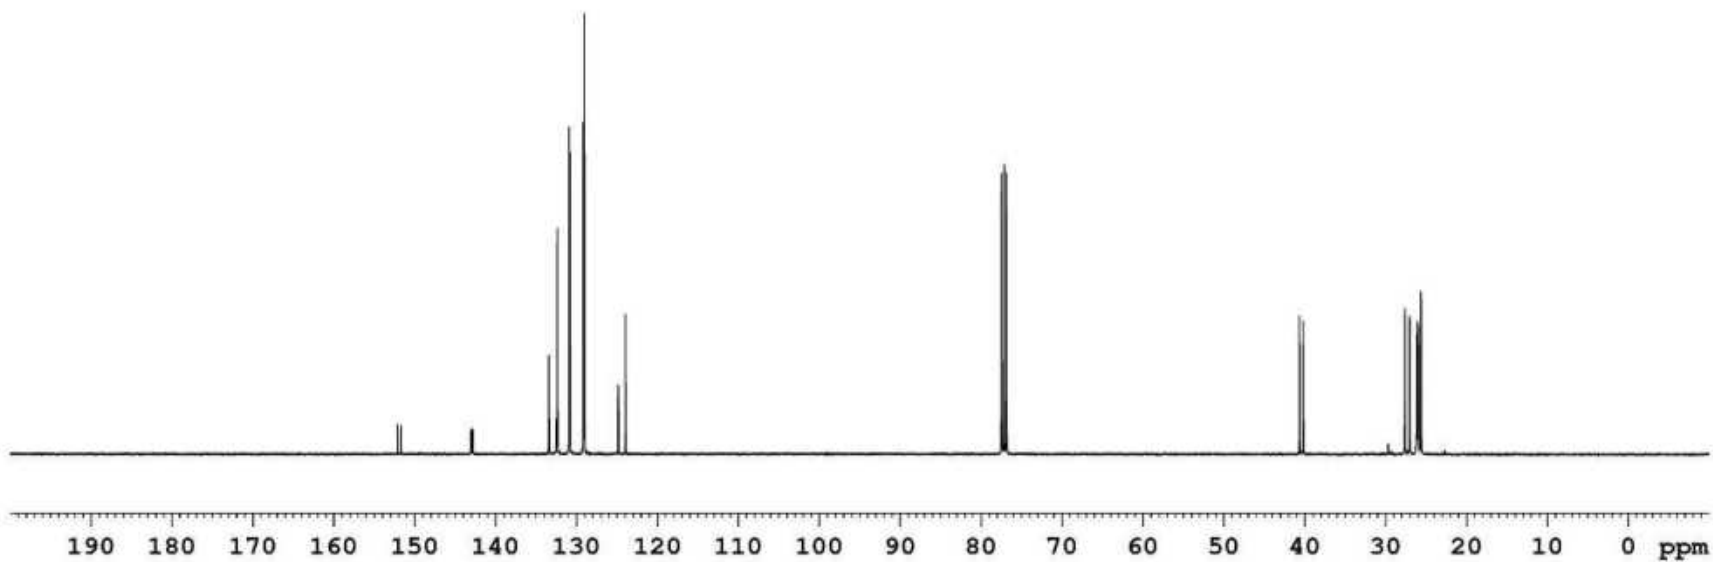

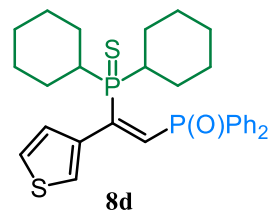

67.86  
67.81

18.44  
18.38

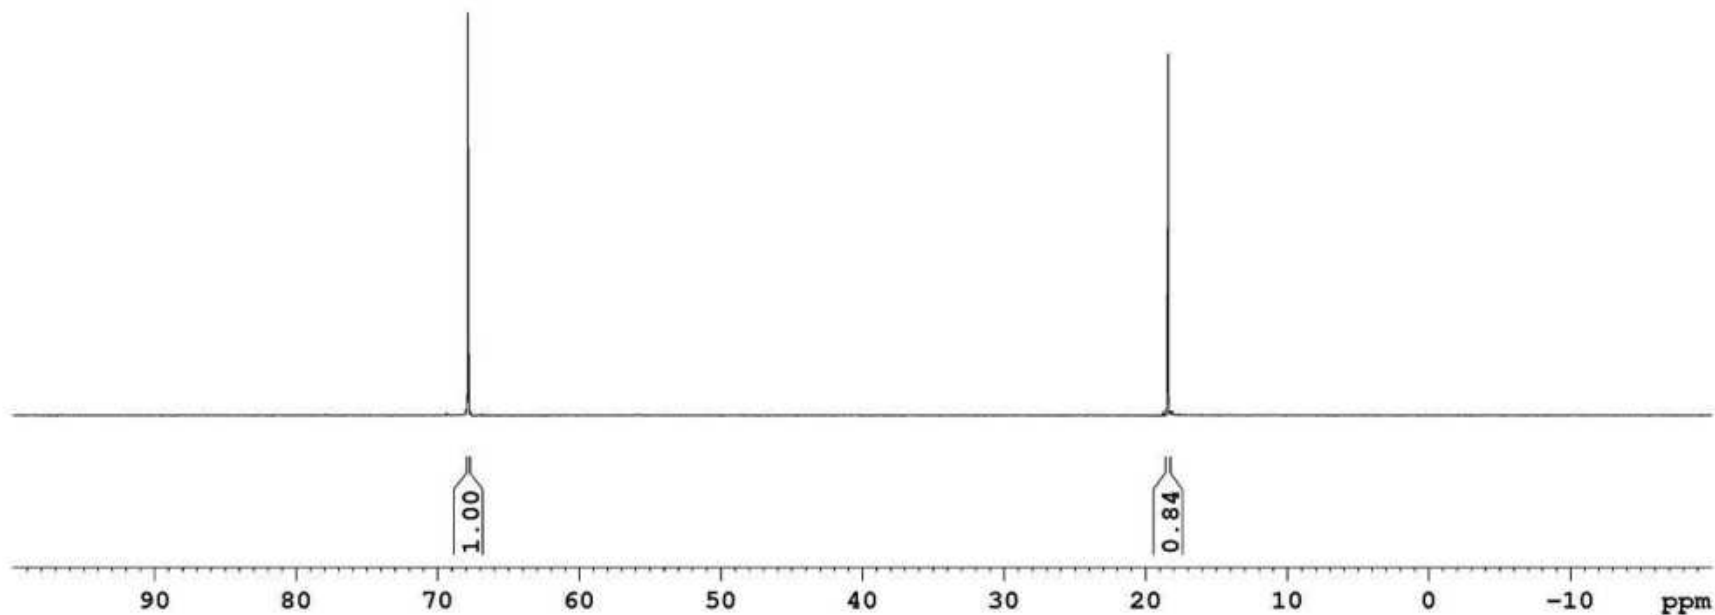

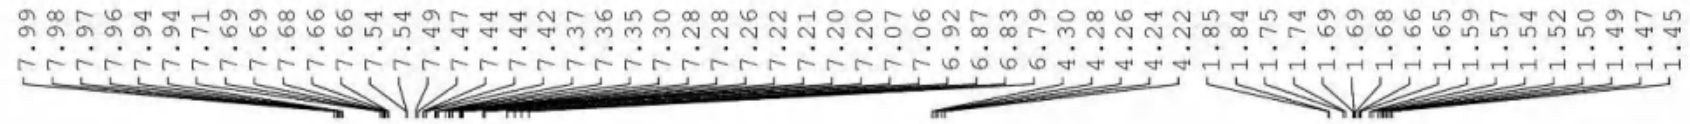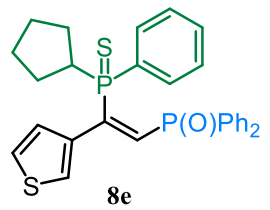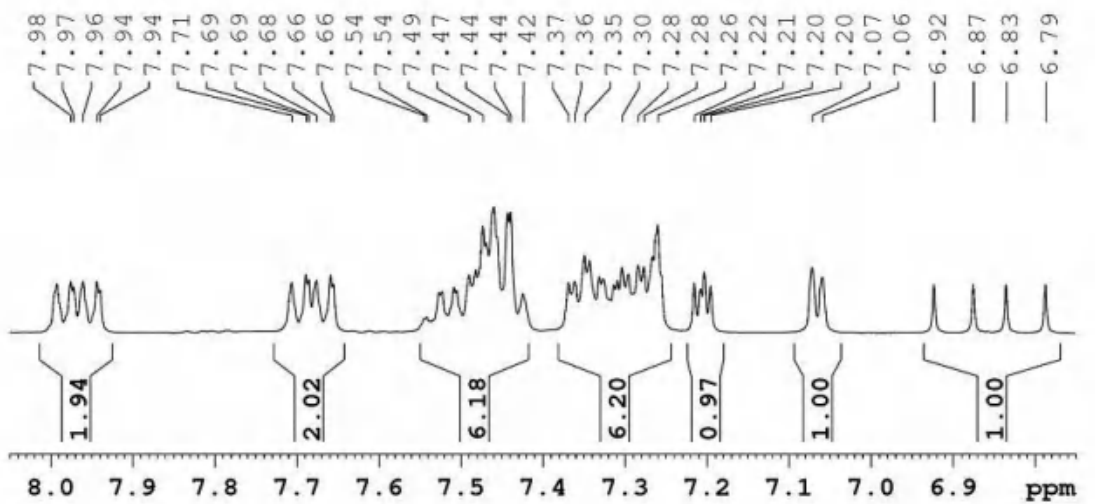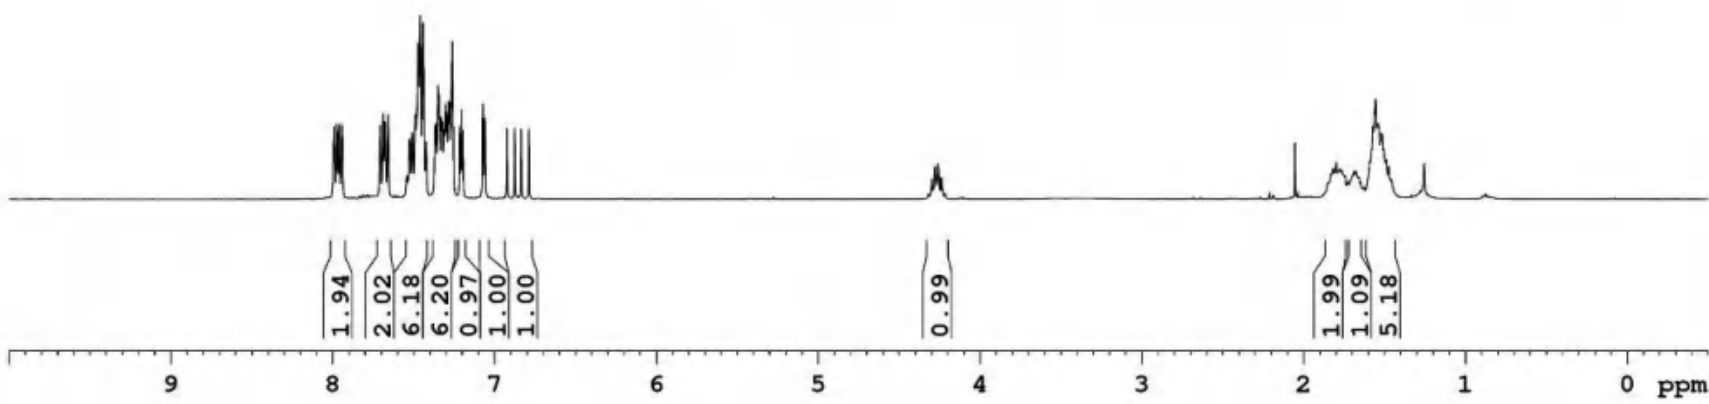

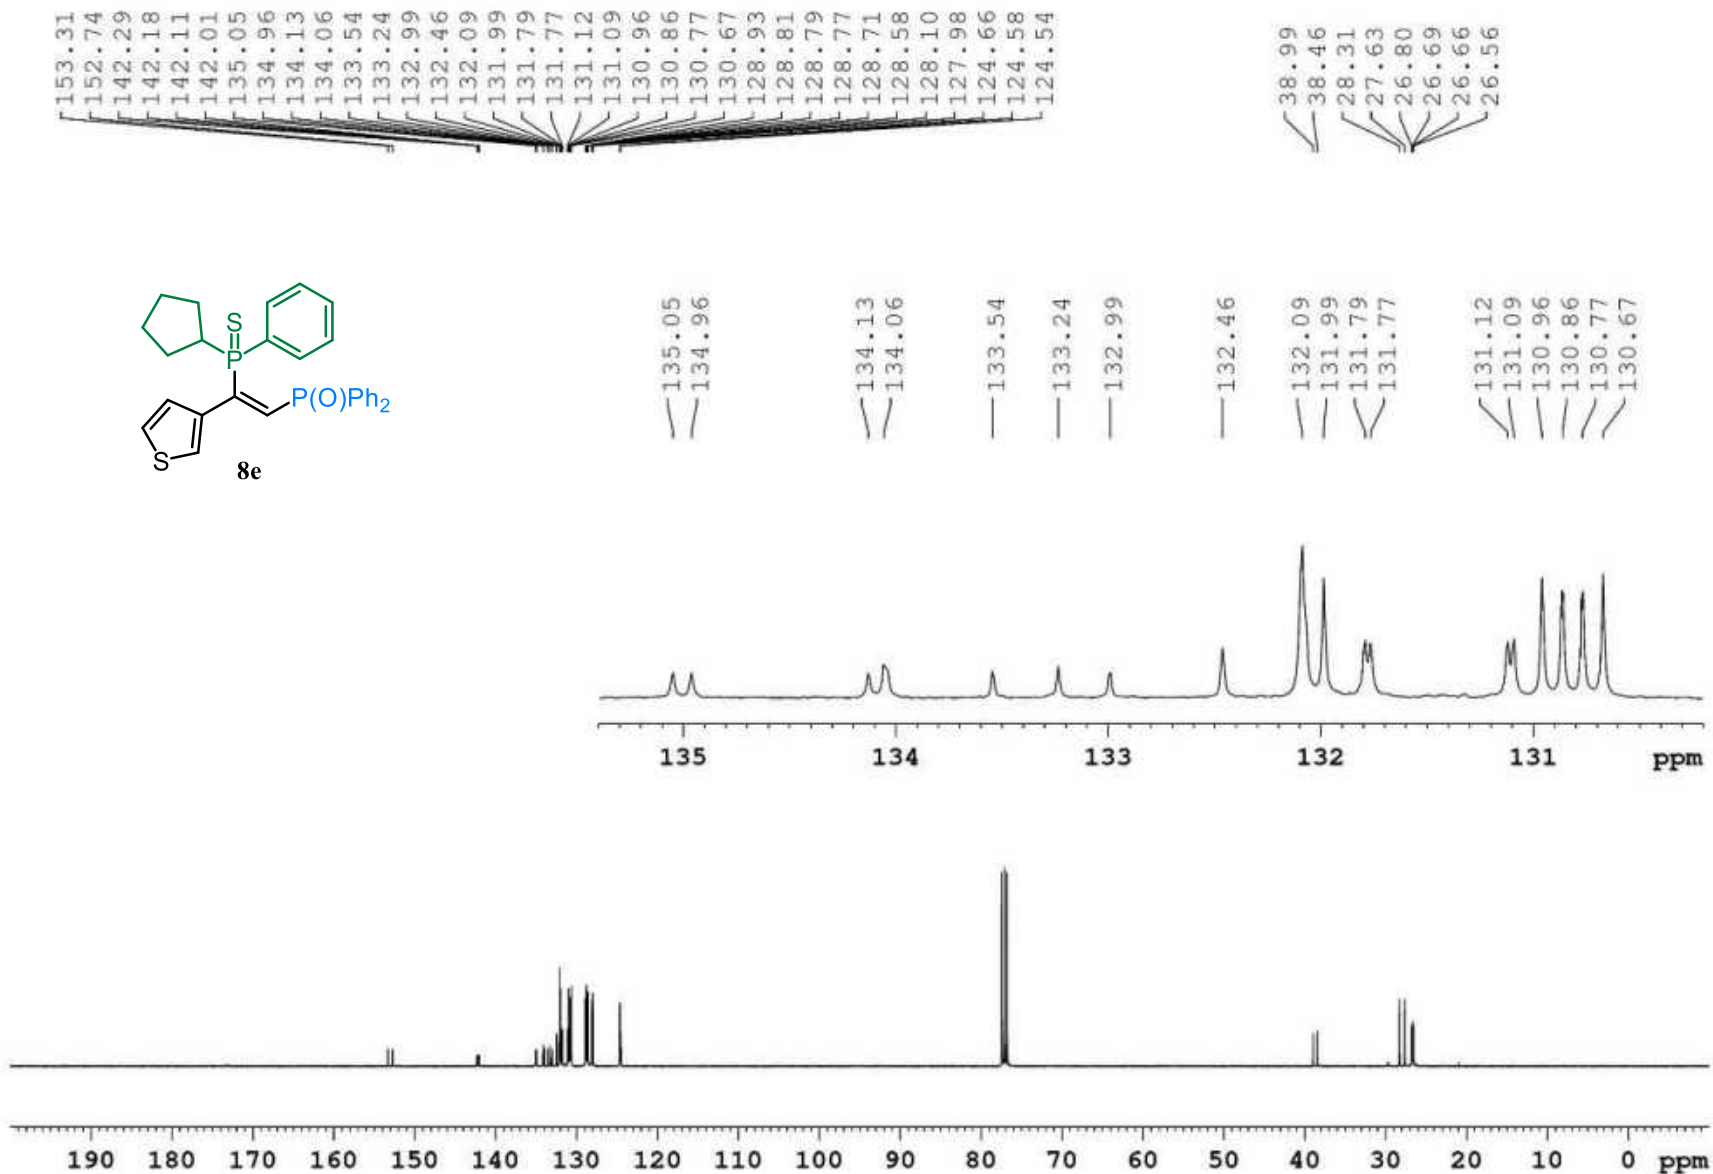



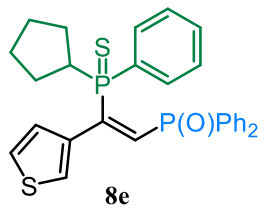

54.25  
54.18

17.83  
17.75

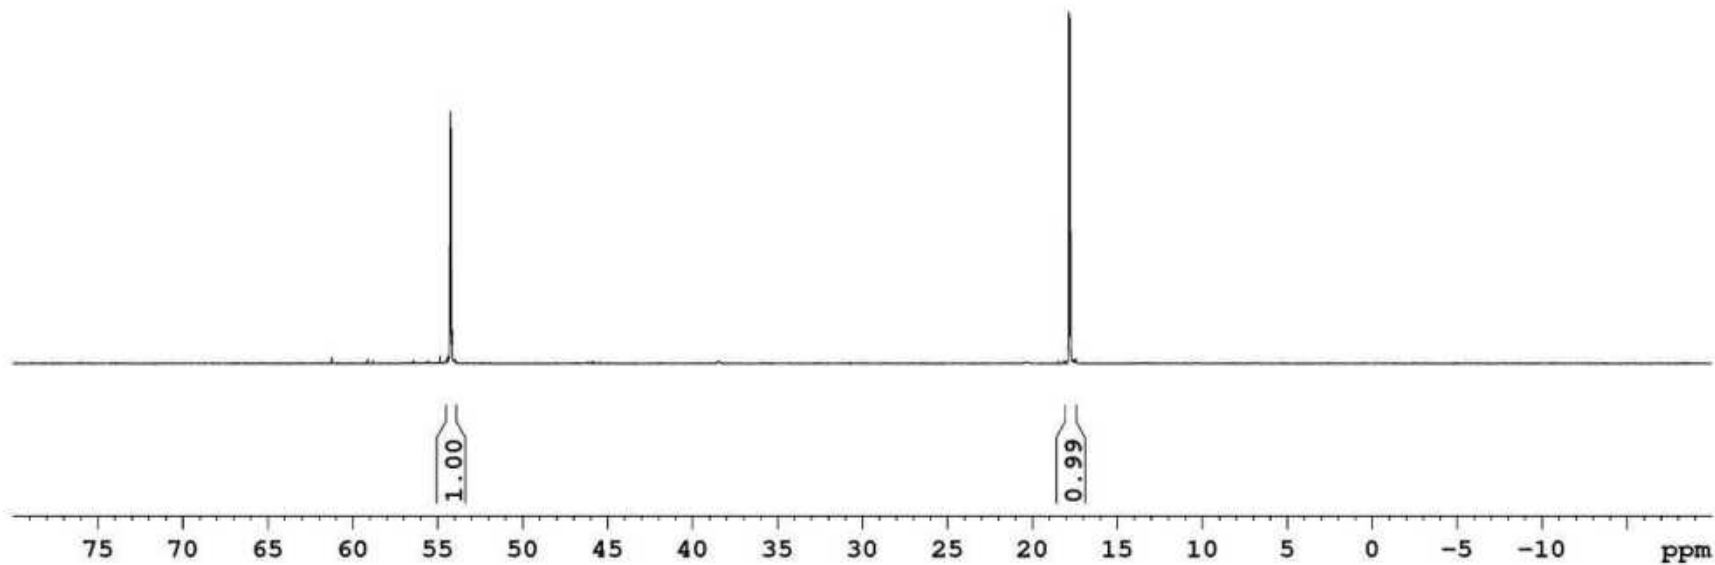

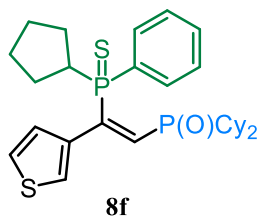

7.96  
7.95  
7.93  
7.91  
7.41  
7.39  
7.38  
7.26  
7.25  
7.17  
7.08  
7.07  
6.27  
6.22  
6.18  
6.13

4.44  
4.42  
4.40  
4.38  
4.35

1.98  
1.94  
1.92  
1.91  
1.89  
1.88  
1.86  
1.83  
1.79  
1.72  
1.64  
1.64  
1.61  
1.50  
1.44  
1.41  
1.25  
1.09  
1.06  
1.03  
1.01  
0.97

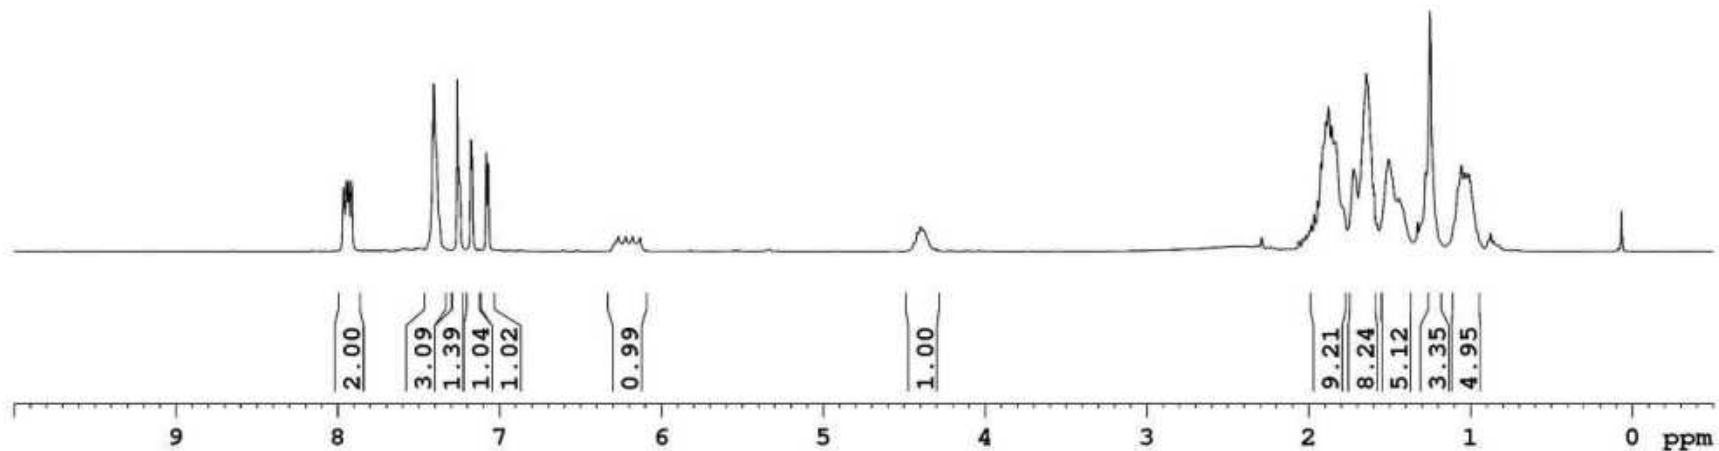

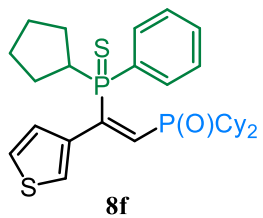

154.24  
 153.67  
 142.91  
 142.80  
 142.76  
 142.65  
 135.36  
 134.92  
 134.82  
 134.58  
 134.18  
 134.08  
 132.39  
 132.29  
 130.78  
 130.75  
 128.98  
 128.96  
 127.85  
 127.73  
 124.32  
 123.98  
 123.93

38.22  
 37.69  
 37.54  
 37.51  
 36.86  
 36.82  
 28.11  
 27.88  
 26.89  
 26.79  
 26.69  
 26.57  
 26.45  
 26.35  
 26.31  
 26.25  
 26.23  
 26.05  
 26.02  
 25.79  
 25.74  
 25.37  
 25.35  
 25.12  
 25.09

135.36  
 134.92  
 134.82  
 134.58  
 134.18  
 134.08  
 132.39  
 132.29  
 130.78  
 130.75  
 128.98  
 128.96  
 127.85  
 127.73

124.32  
 123.98  
 123.93

— 28.11  
 — 27.88

26.89  
 26.79  
 26.69  
 26.57  
 26.45  
 26.35  
 26.31  
 26.25  
 26.23  
 26.05  
 26.02  
 25.79  
 25.74  
 25.37  
 25.35  
 25.12  
 25.09

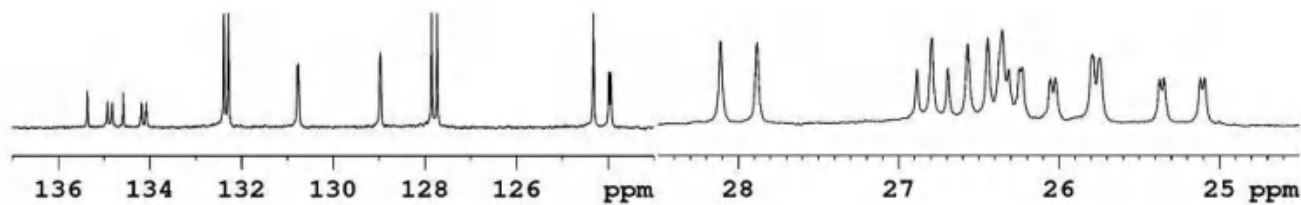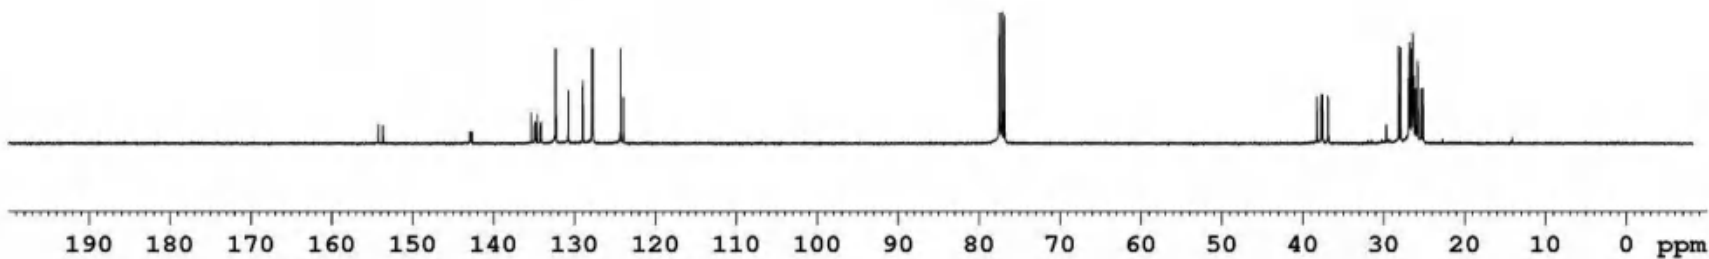

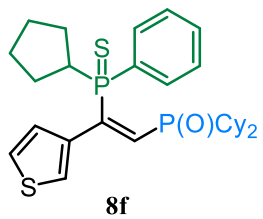

54.23  
54.16

41.82  
41.77

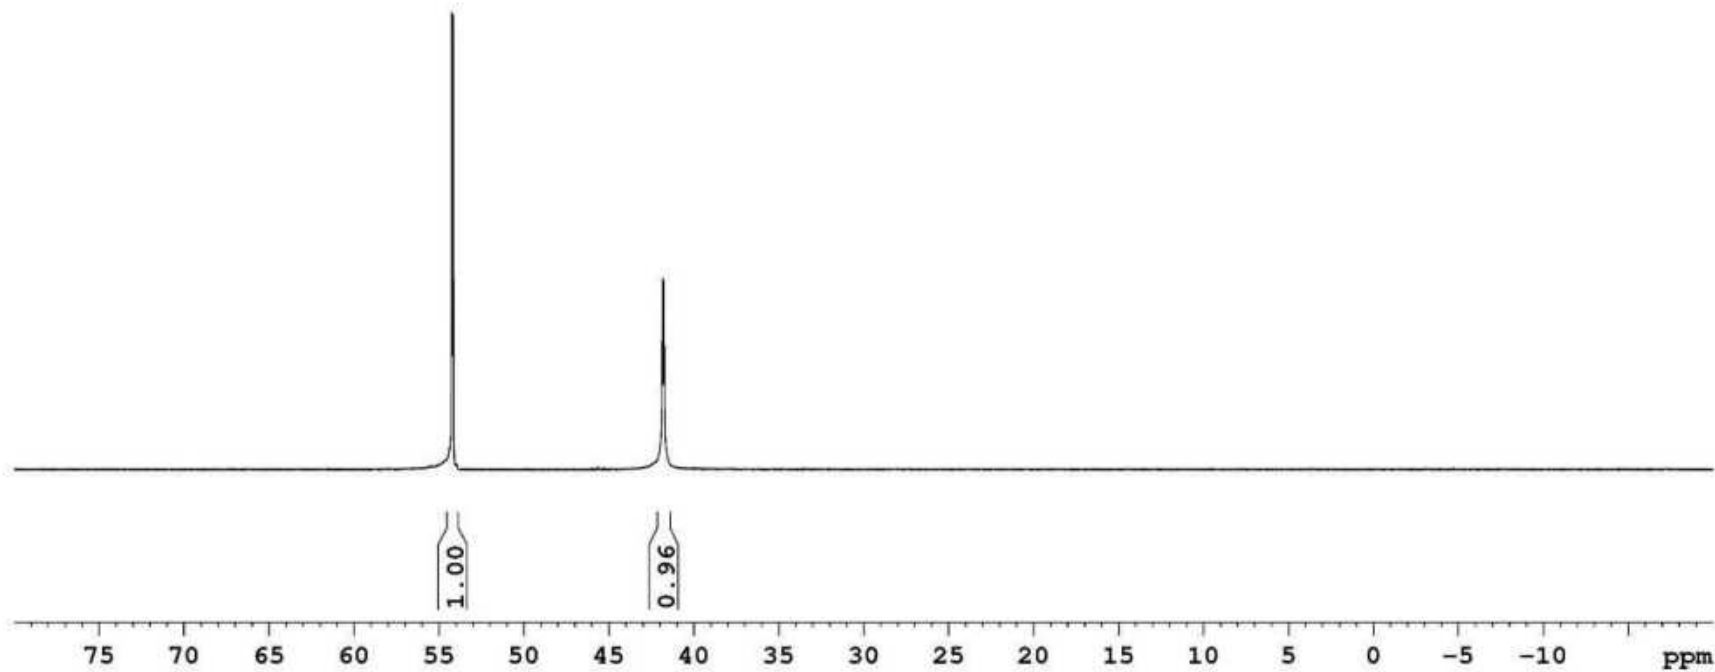

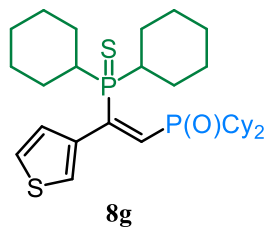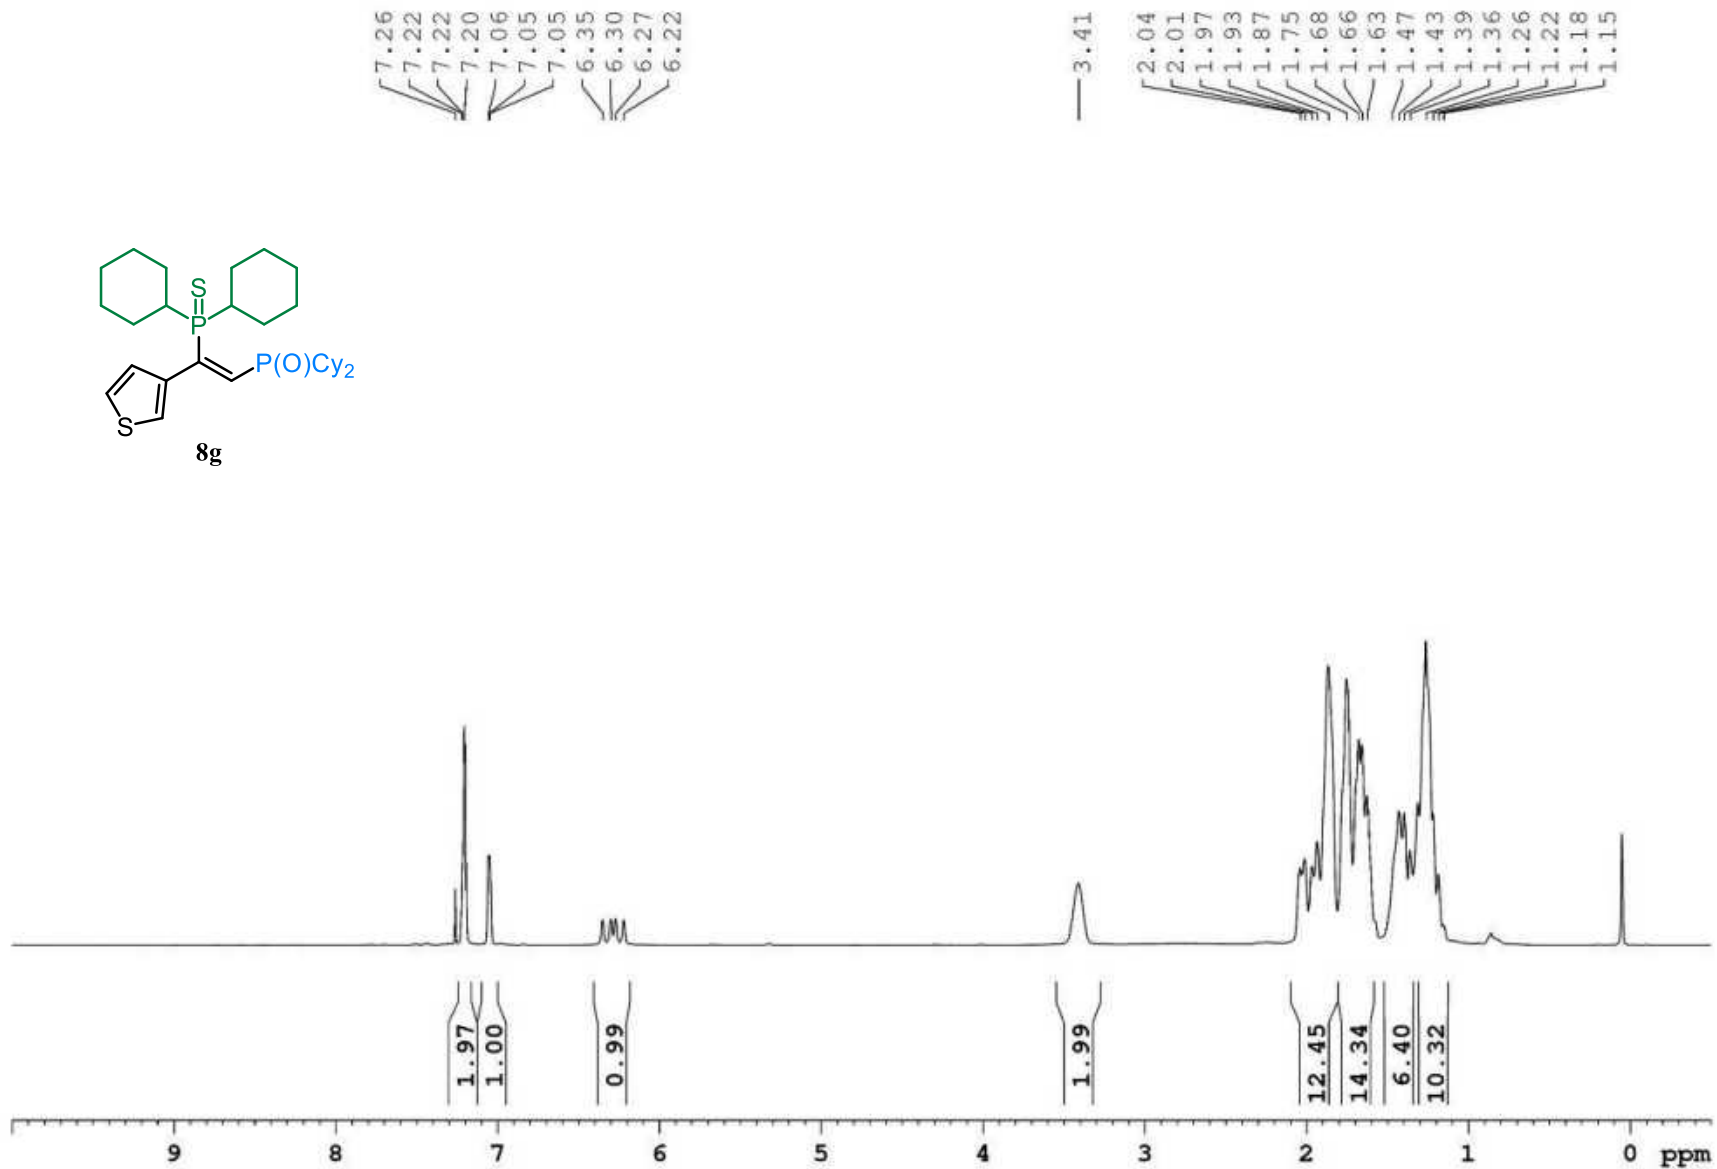



153.56  
153.09  
142.56  
142.47  
142.41  
142.30  
131.52  
130.82  
127.97  
127.95  
123.31  
123.26  
122.85

39.98  
39.53  
36.77  
36.09  
26.38  
26.36  
26.11  
26.08  
25.67  
25.63  
25.60  
25.54  
25.49  
25.37  
25.09  
25.06  
24.94  
24.92  
24.83  
24.77  
24.74  
24.61

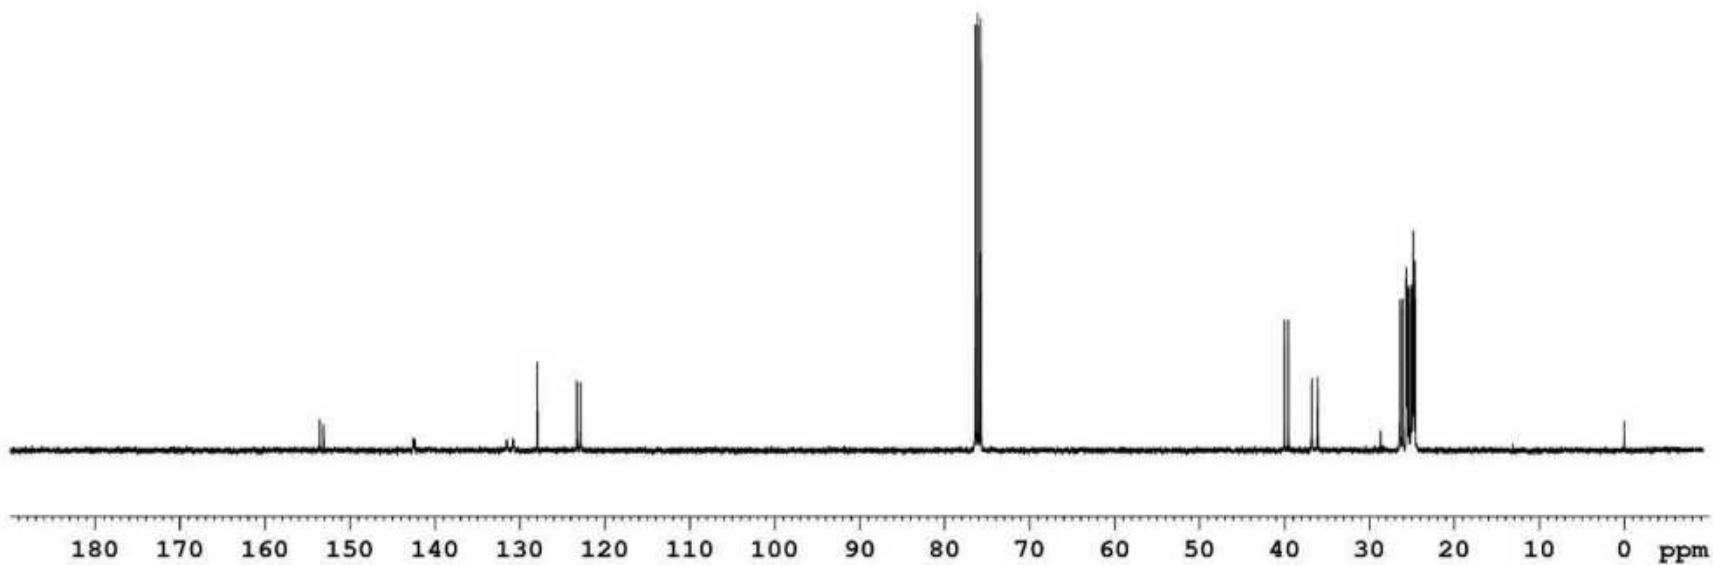

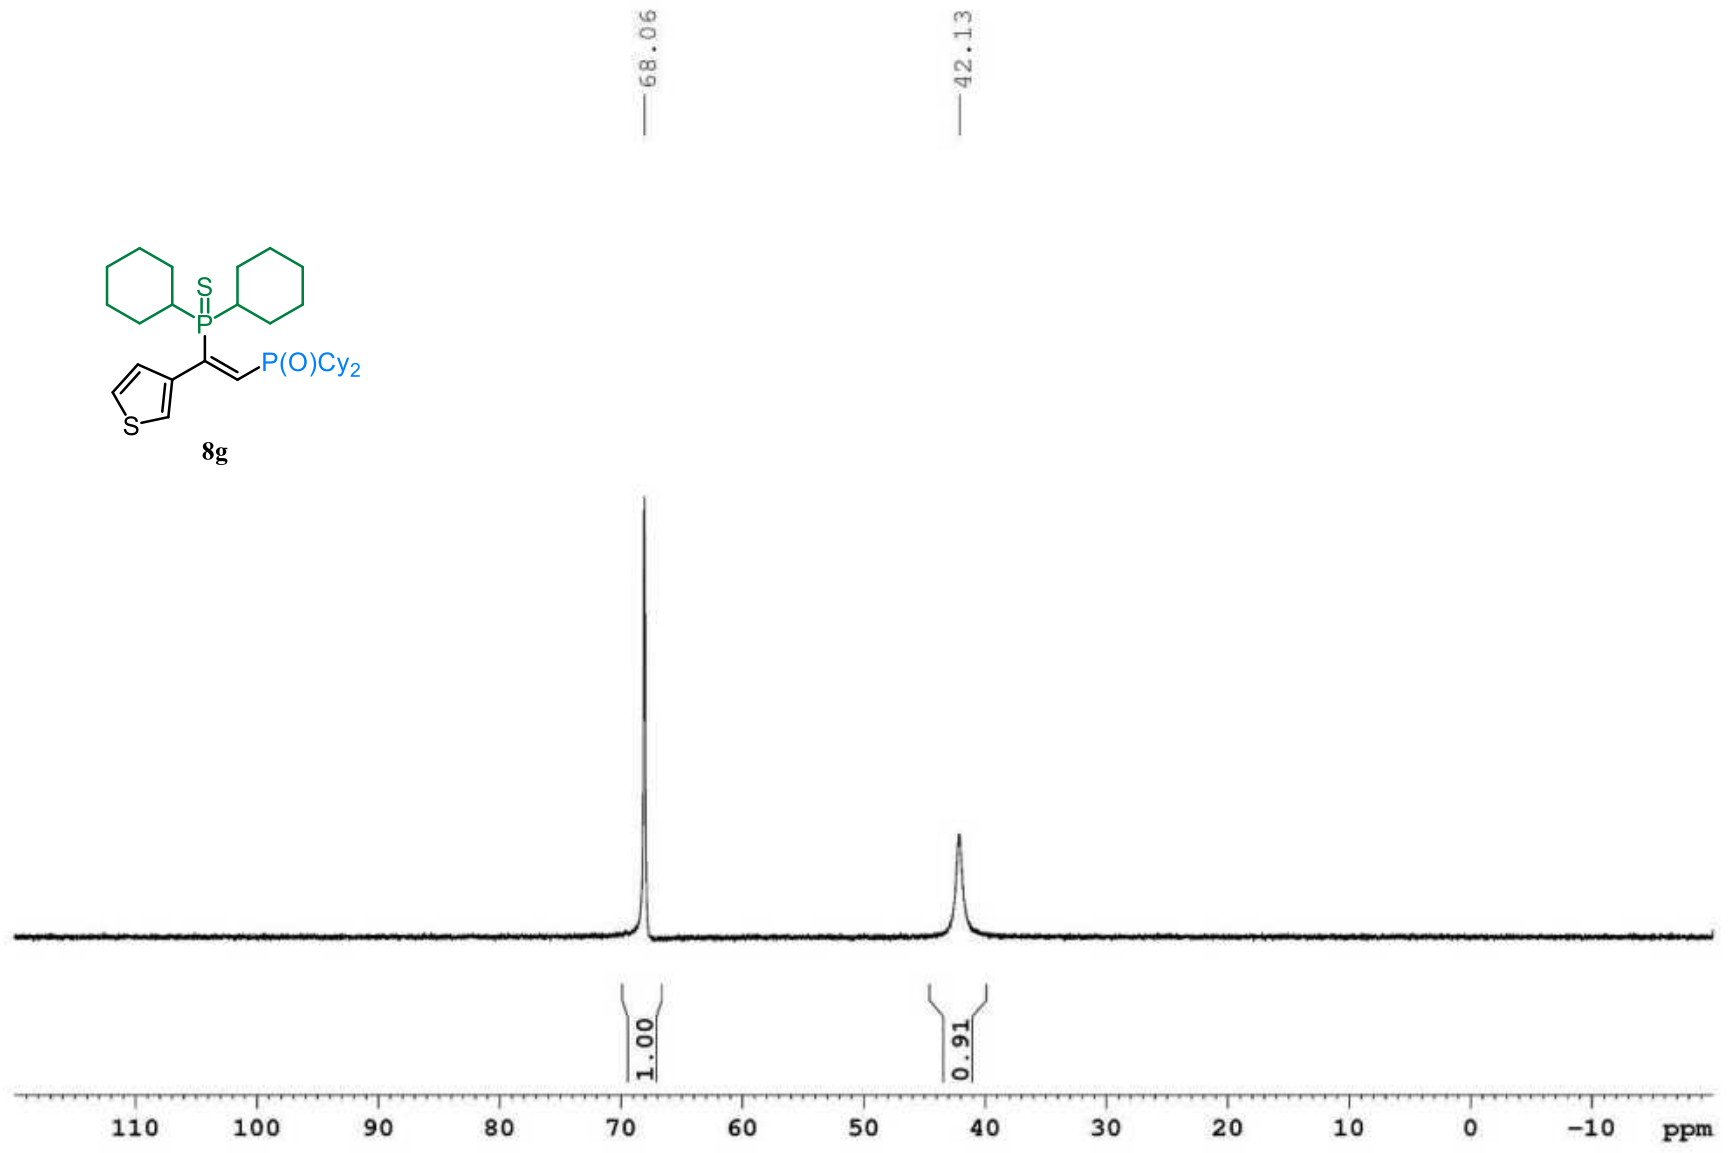

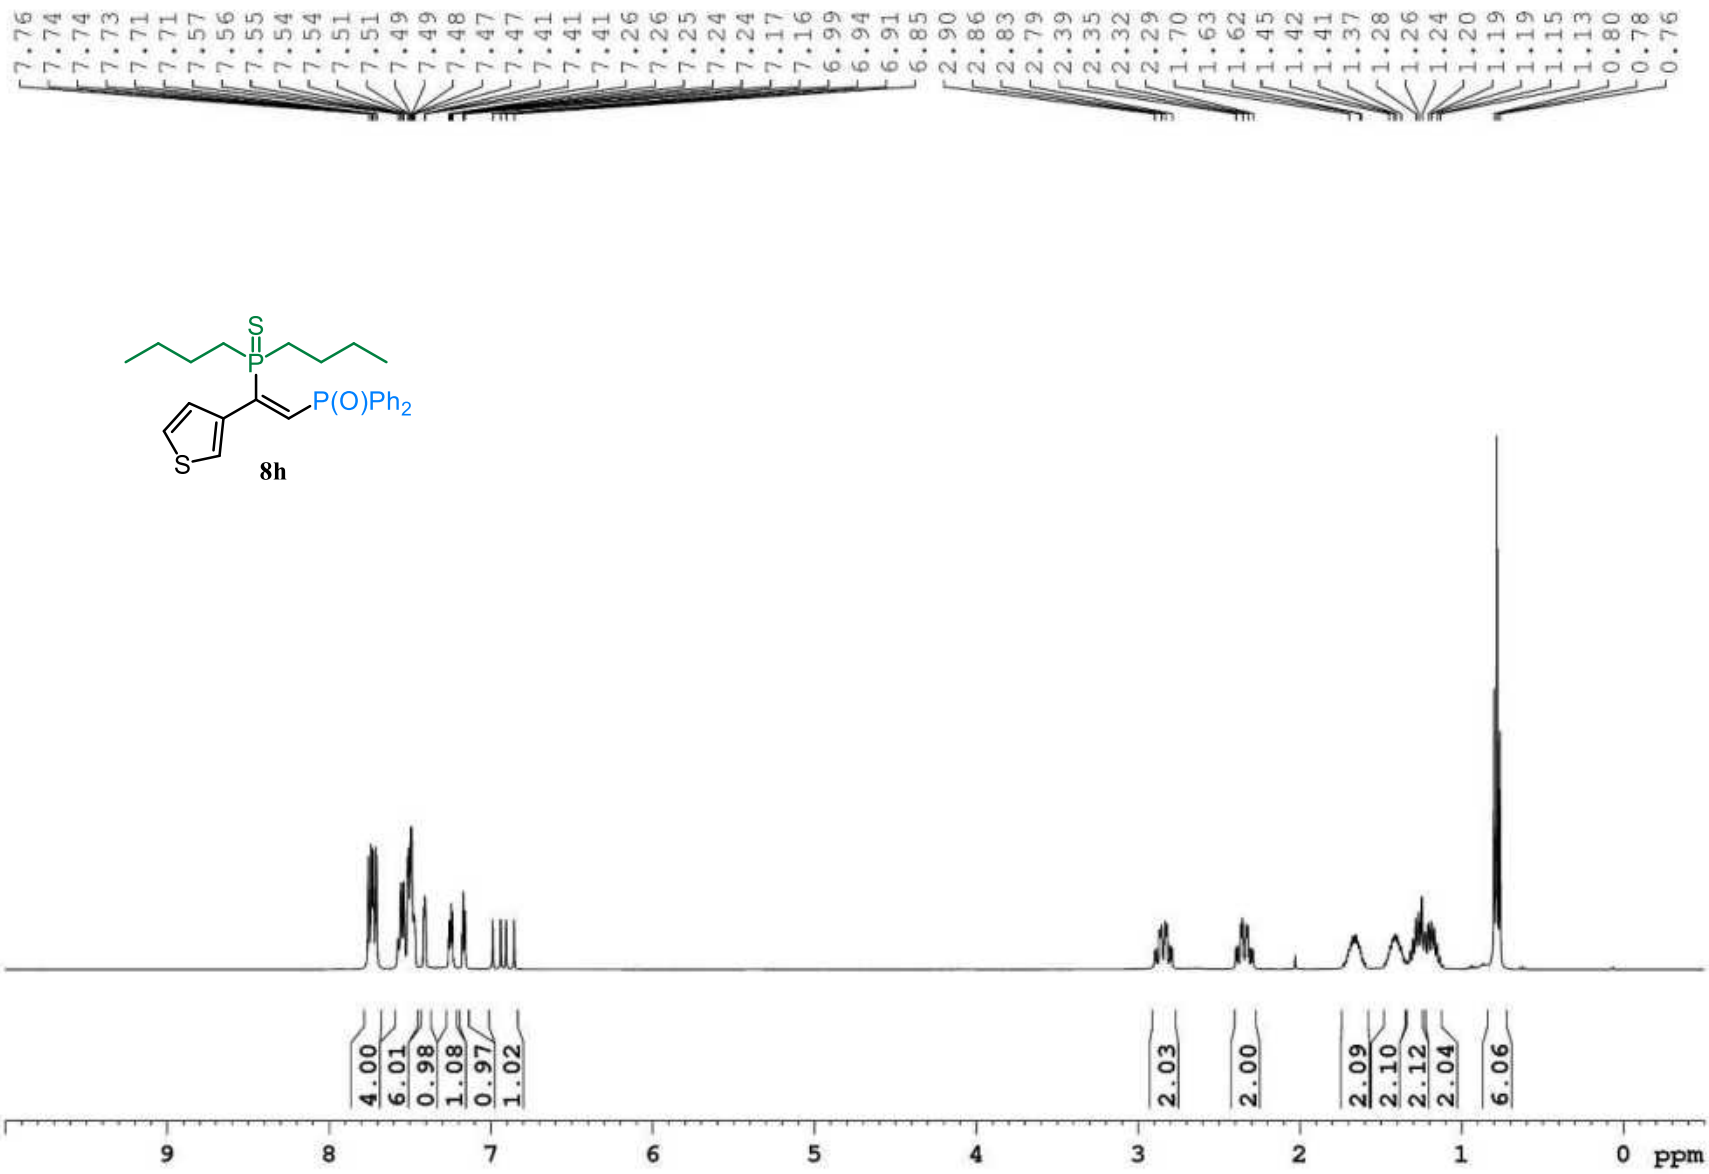



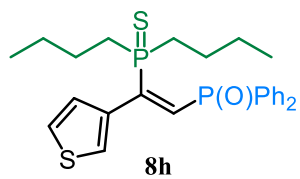

152.01  
151.50  
142.40  
142.30  
142.23  
142.13  
134.36  
134.28  
133.59  
133.44  
133.36  
132.53  
132.34  
132.31  
130.98  
130.88  
129.06  
128.94  
128.82  
128.80  
124.97  
124.92  
124.55

34.01  
33.51  
24.76  
24.72  
23.83  
23.65  
13.67

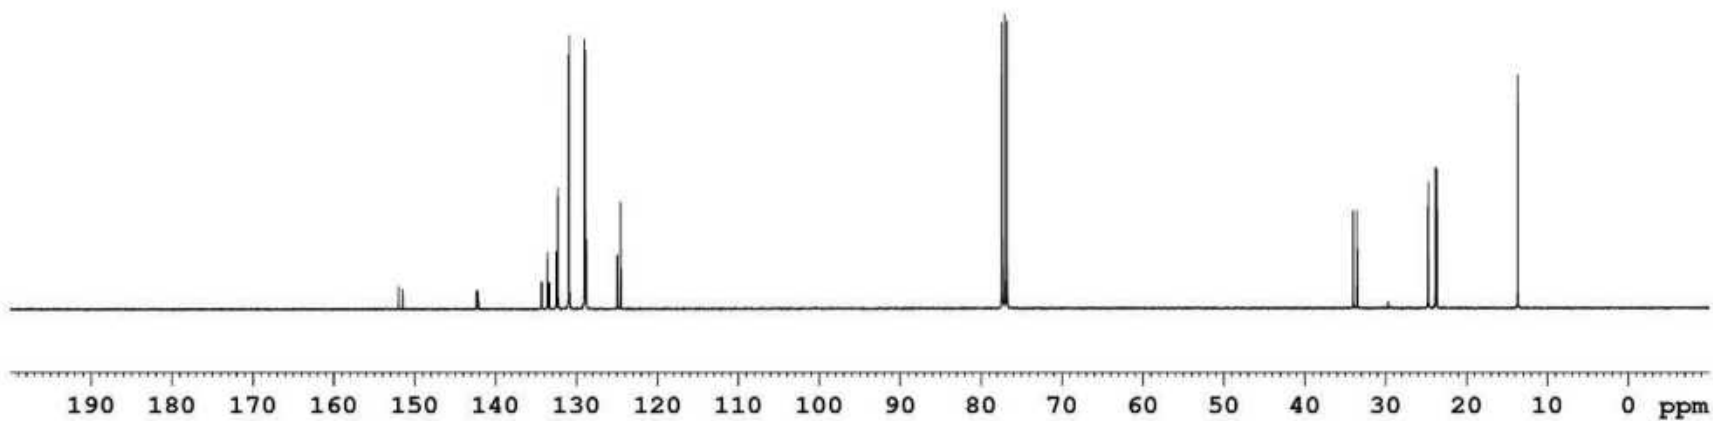



51.93  
51.86

18.59  
18.52

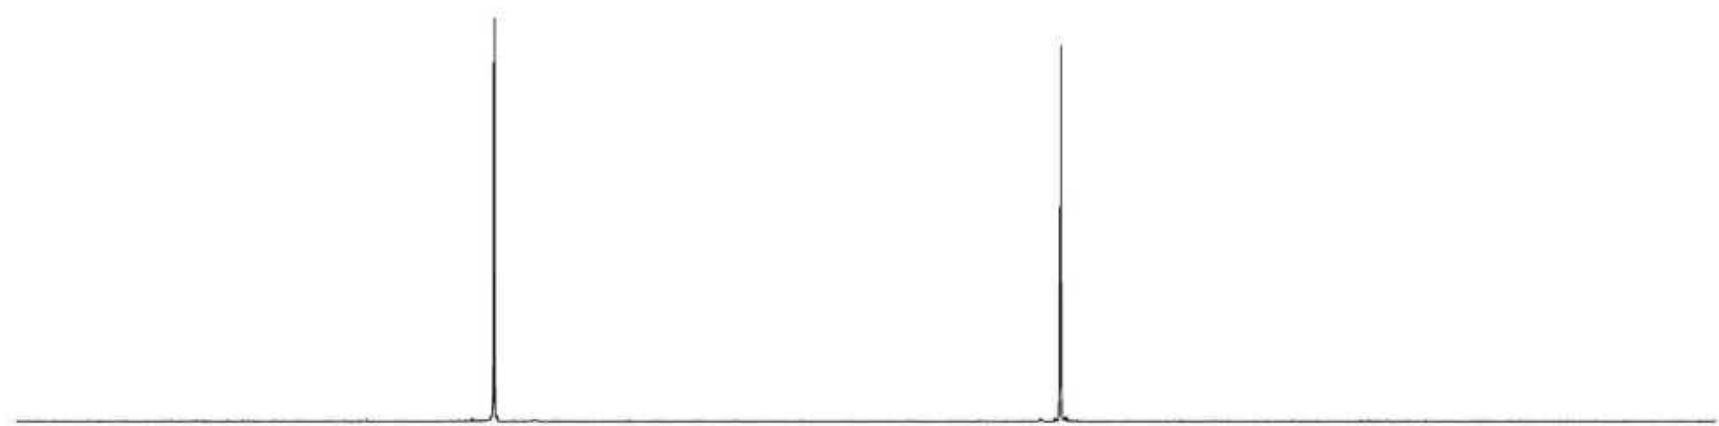

1.00

0.85

75 70 65 60 55 50 45 40 35 30 25 20 15 10 5 0 -5 -10 ppm

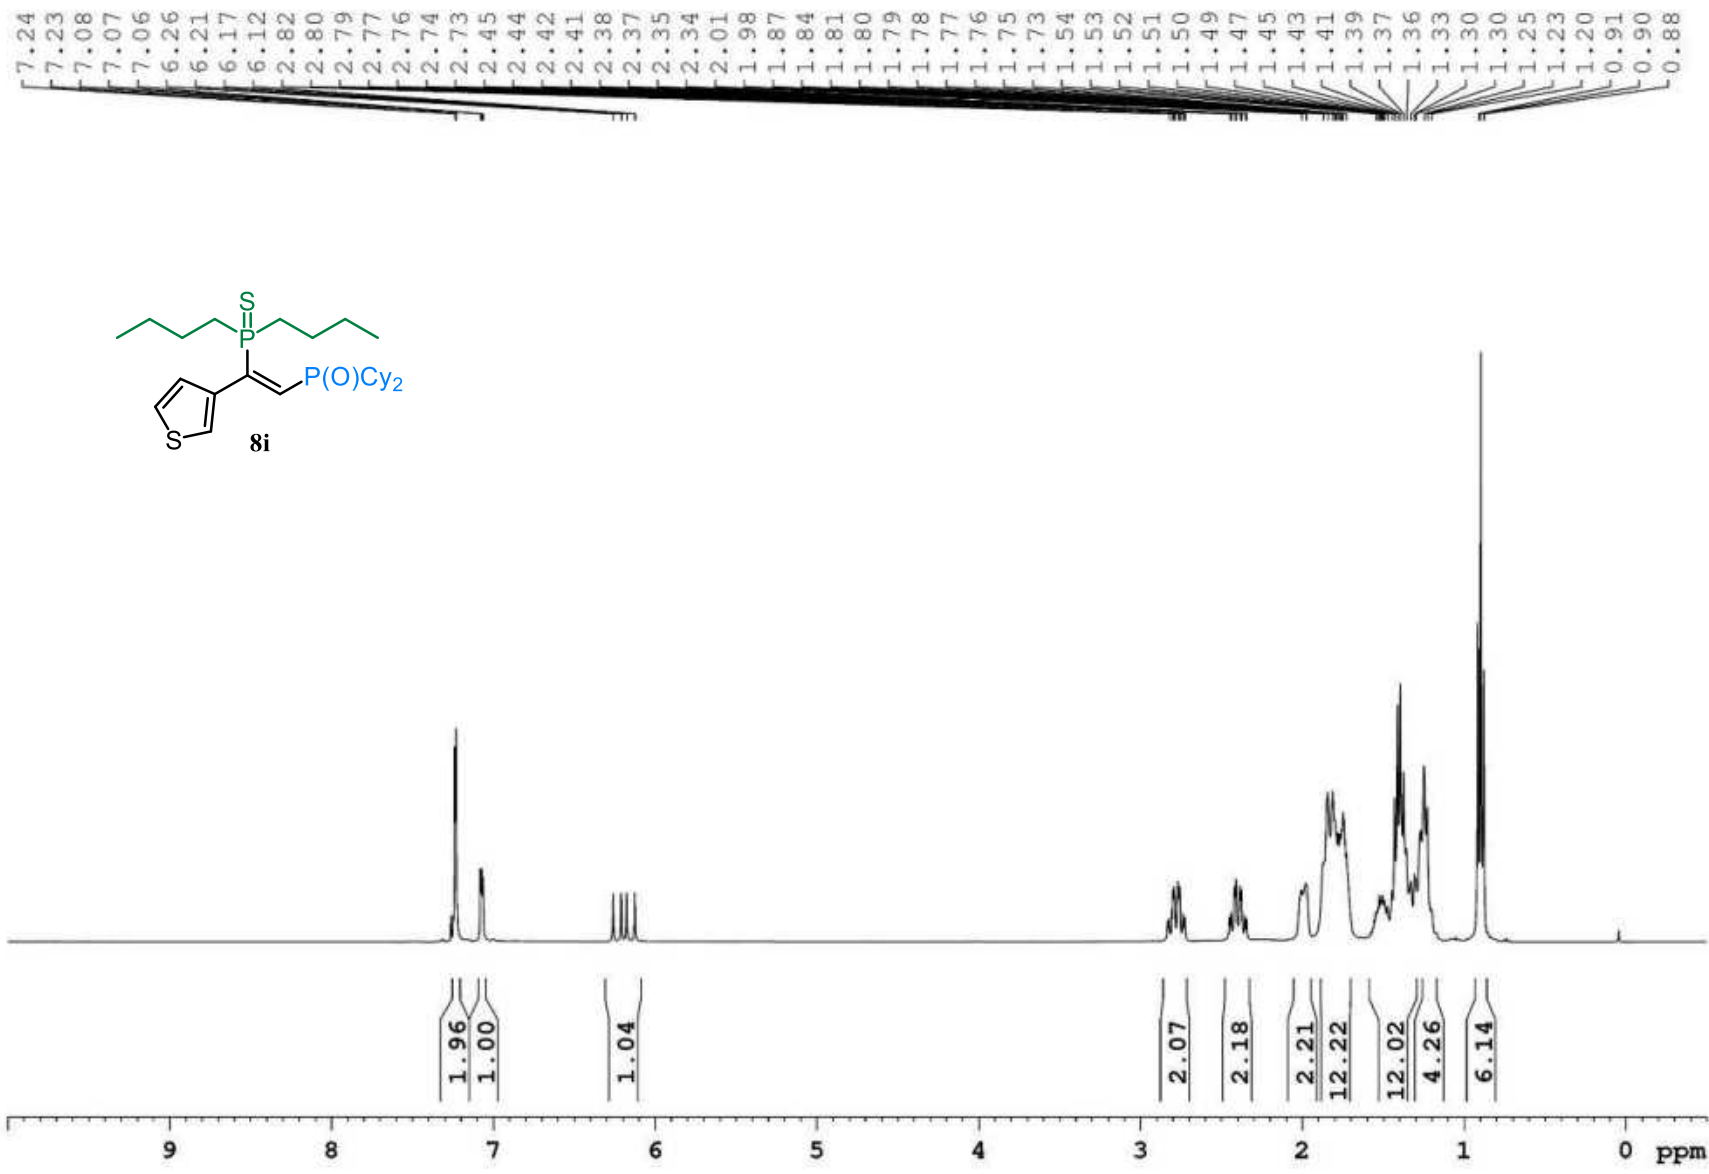

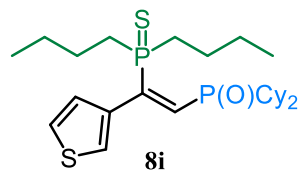

153.70  
153.18  
143.13  
143.03  
142.98  
142.87  
133.22  
133.13  
132.49  
132.39  
128.90  
128.88  
124.20  
124.15

36.81  
36.12  
34.39  
33.89  
26.55  
26.49  
26.46  
26.43  
26.37  
26.24  
25.83  
25.18  
25.15  
24.92  
24.88  
24.00  
23.82  
13.86

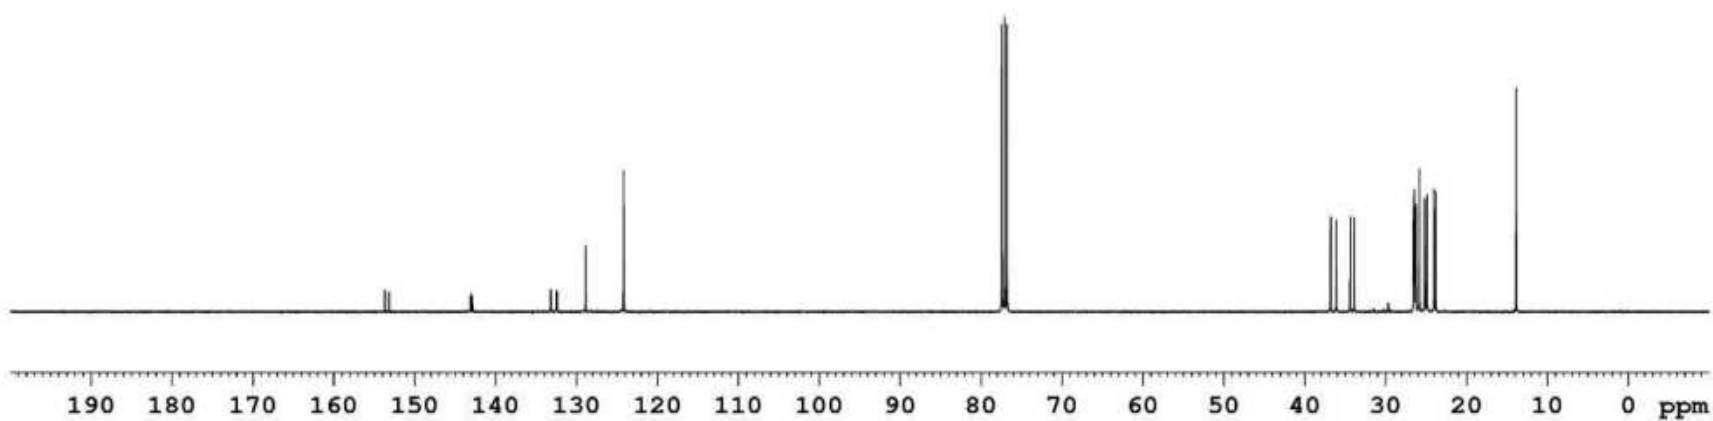

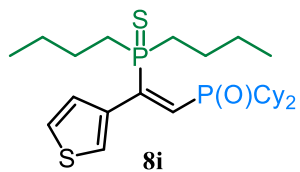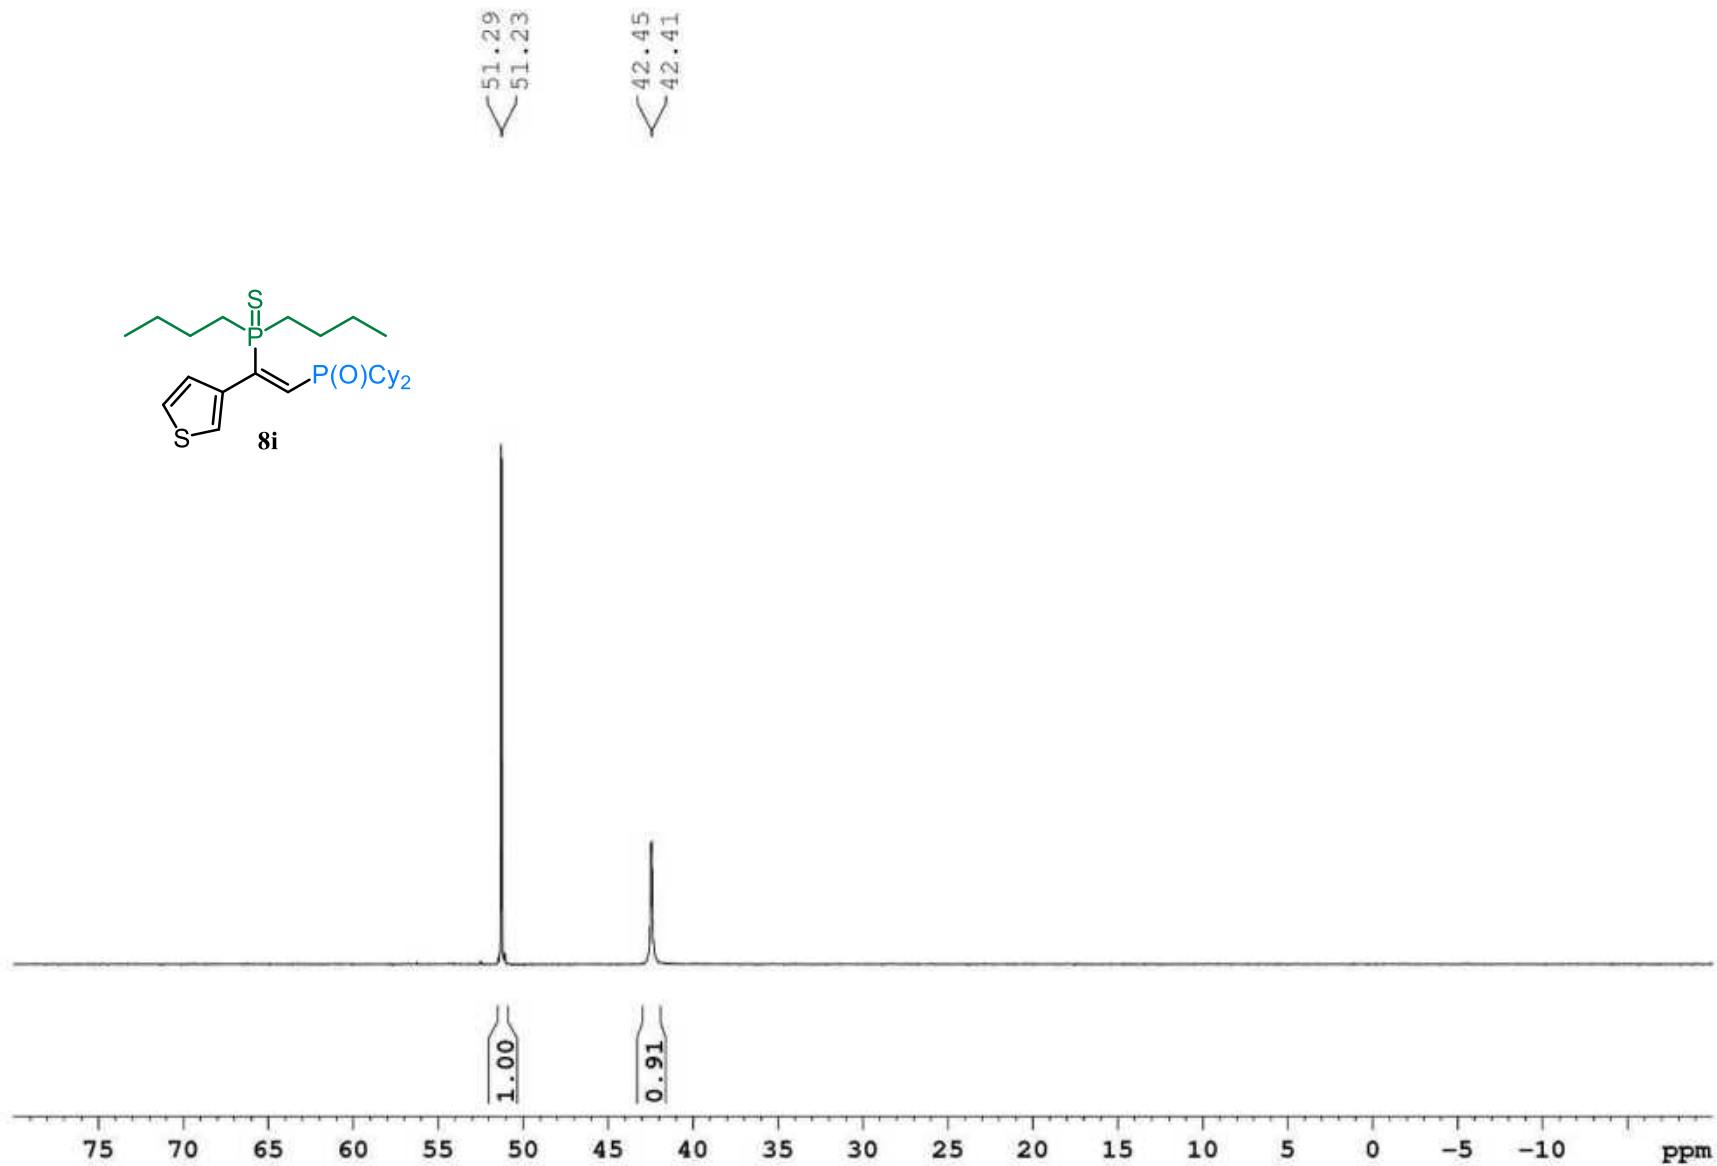

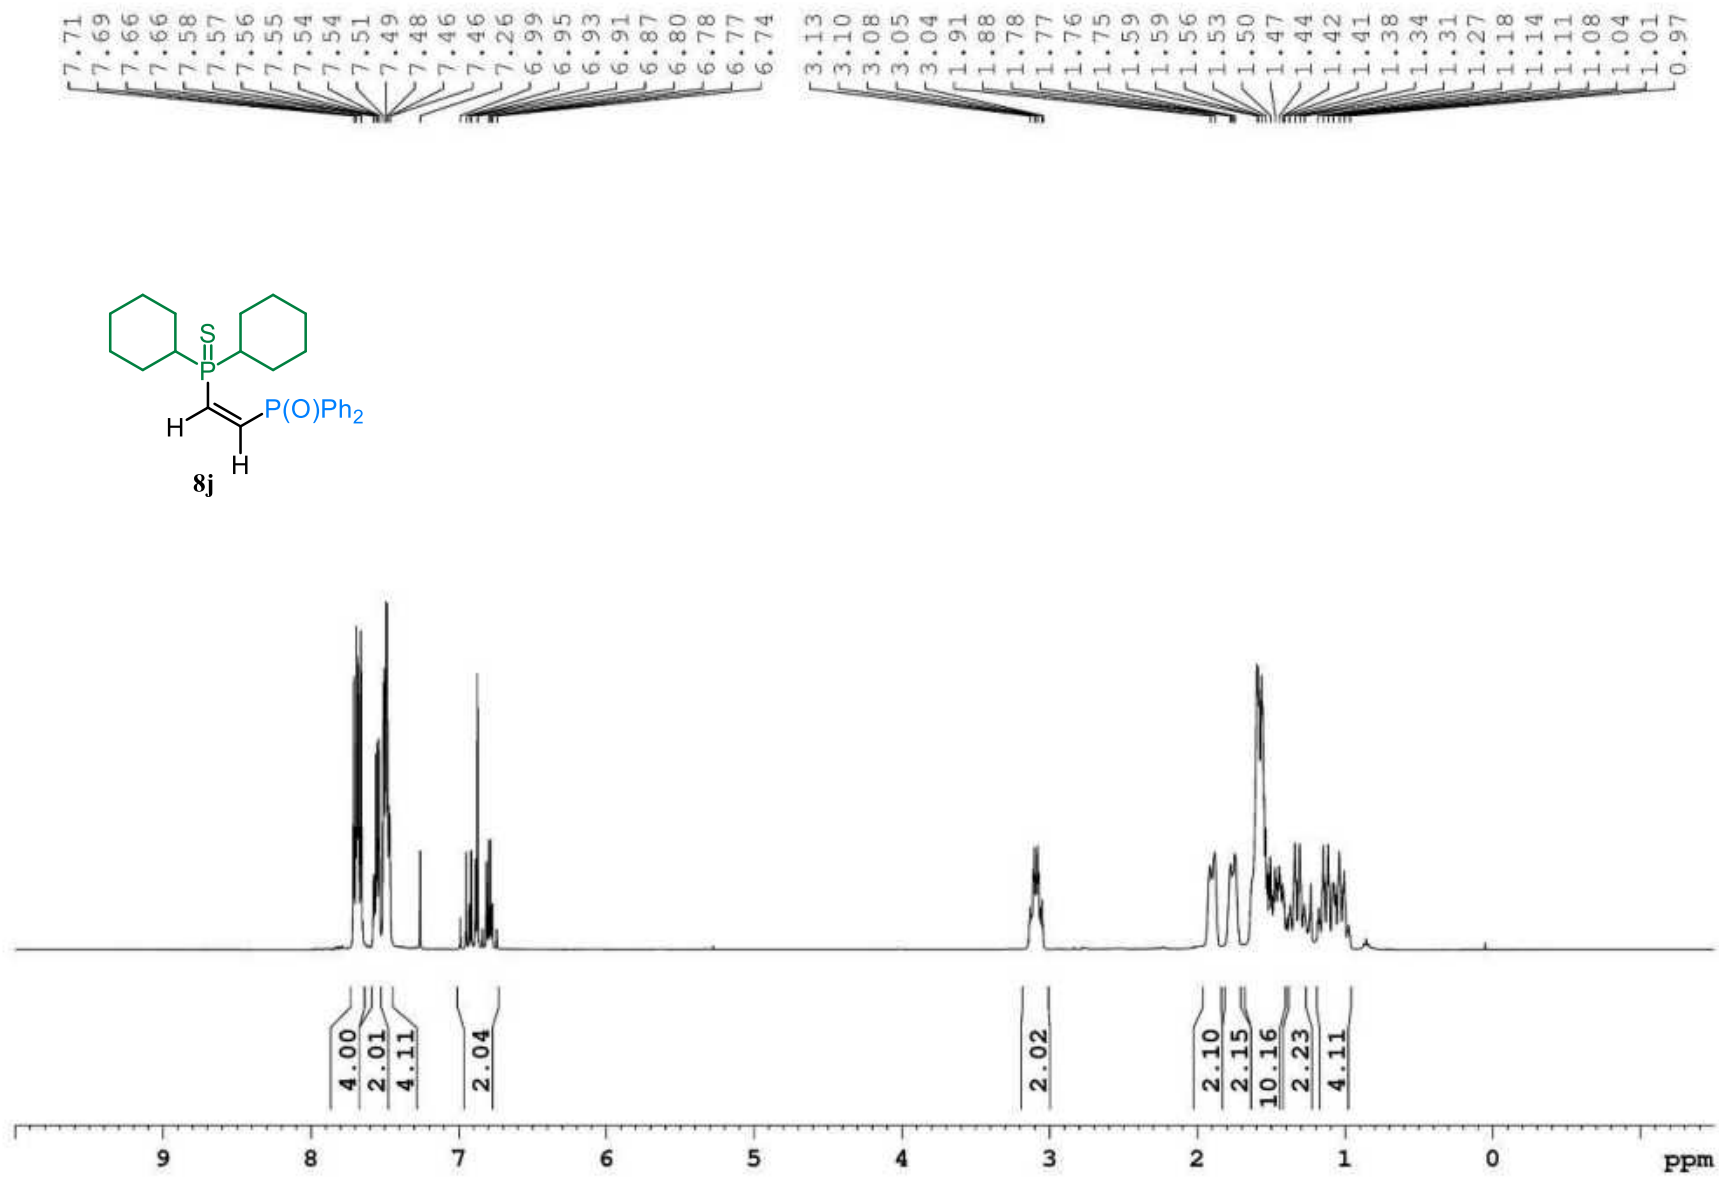

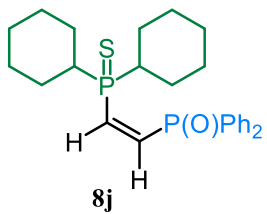

148.84  
148.29  
136.30  
136.28  
135.37  
135.35  
132.77  
132.42  
132.39  
131.71  
130.92  
130.83  
129.07  
128.95

39.23  
38.77  
27.08  
27.05  
26.97  
26.95  
26.12  
26.07  
25.97  
25.92  
25.64  
25.63

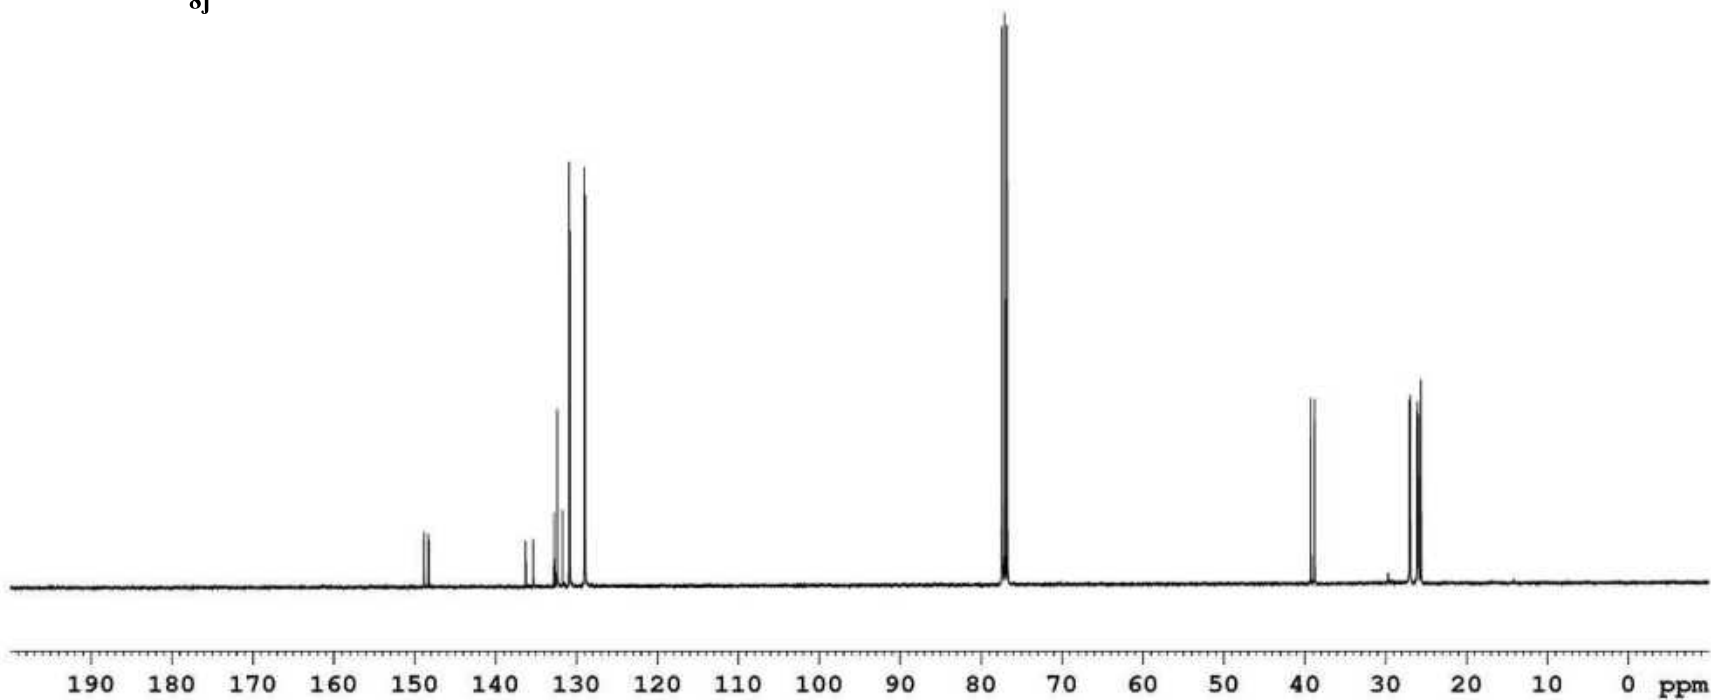



60.78  
60.67

18.84  
18.73

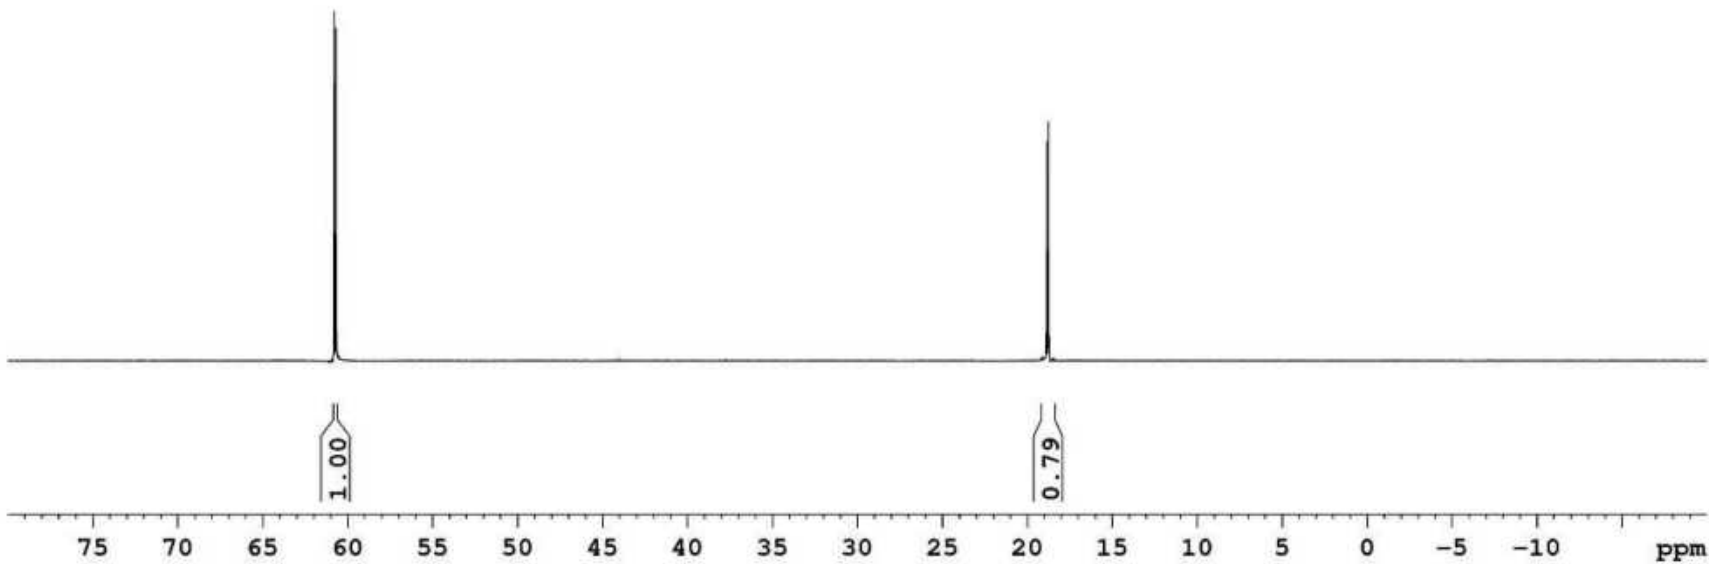



7.35  
7.33  
7.32  
7.30  
7.28  
7.28  
7.24  
7.24  
7.22  
7.20  
7.18  
7.15  
7.13  
7.12  
7.12

2.84  
2.80  
2.77  
2.73  
1.90  
1.87  
1.76  
1.75  
1.72  
1.72  
1.69  
1.60  
1.59  
1.55  
1.52  
1.37  
1.36  
1.20  
1.18  
1.17  
1.14  
1.11  
1.04  
0.93  
0.92  
0.84  
0.83  
0.53  
0.32  
0.08  
0.01  
-0.00  
-0.23

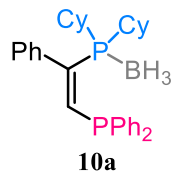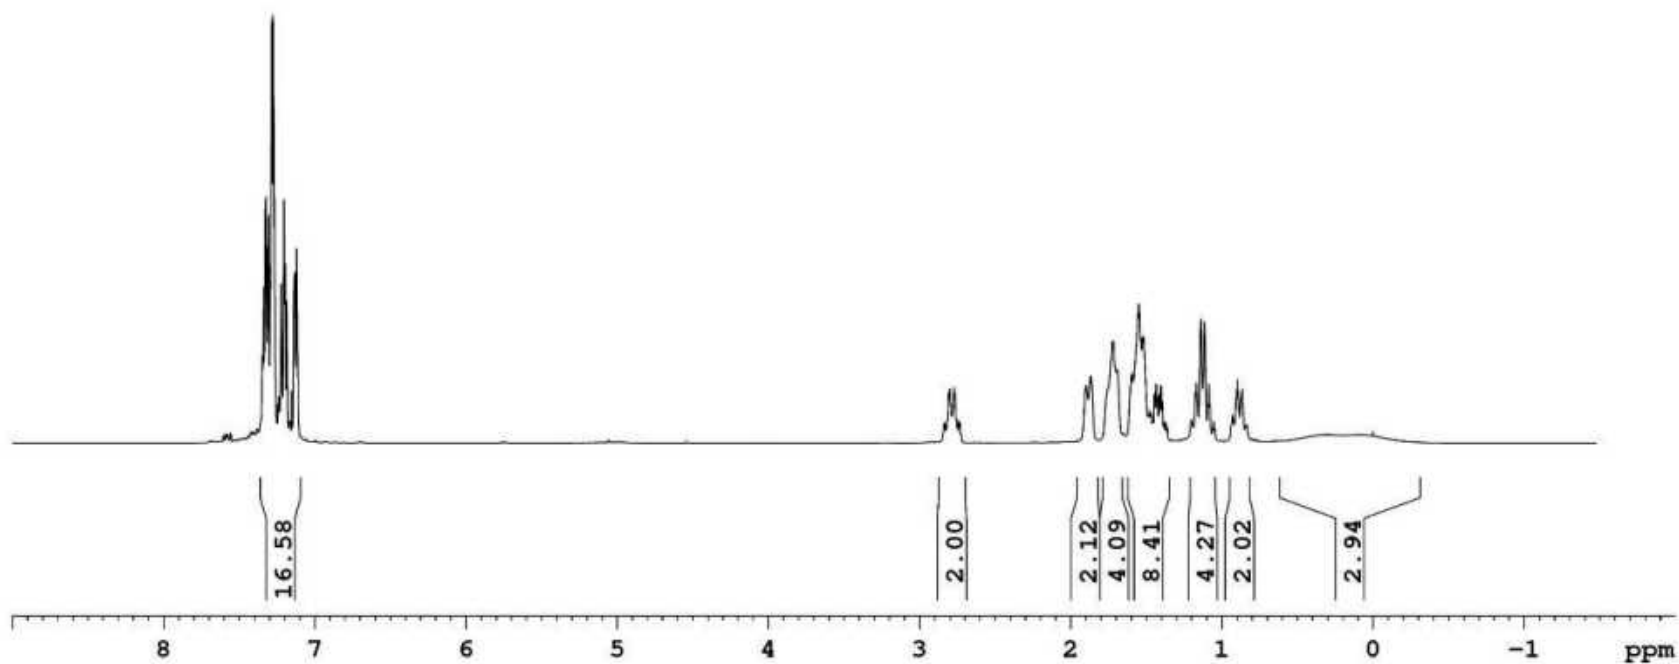

150.70  
150.44  
150.36  
150.10  
147.30  
147.12  
143.78  
143.67  
143.64  
143.54  
137.98  
137.90  
132.82  
132.63  
129.21  
128.97  
128.90  
128.33  
128.30  
127.61  
127.59

36.71  
36.56  
36.41  
36.26  
28.46  
28.02  
26.95  
26.83  
26.79  
26.67  
25.80  
25.79

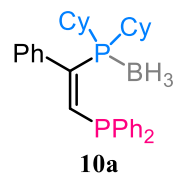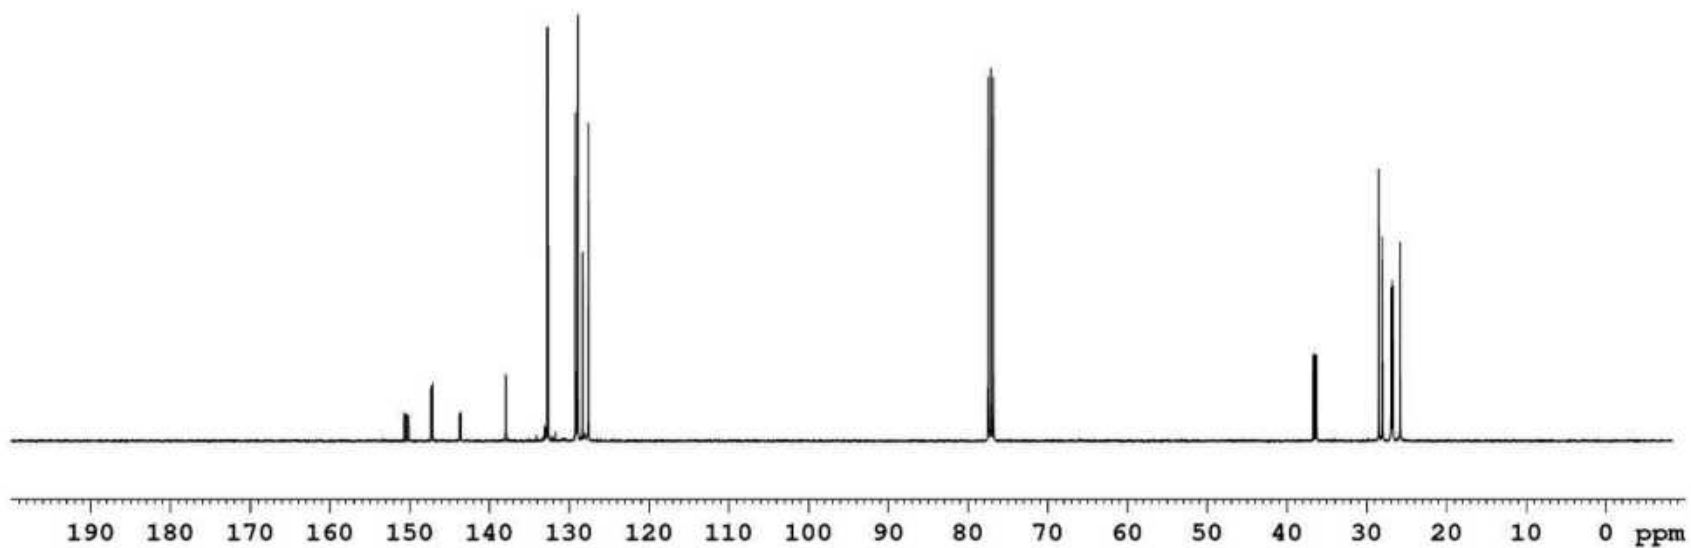

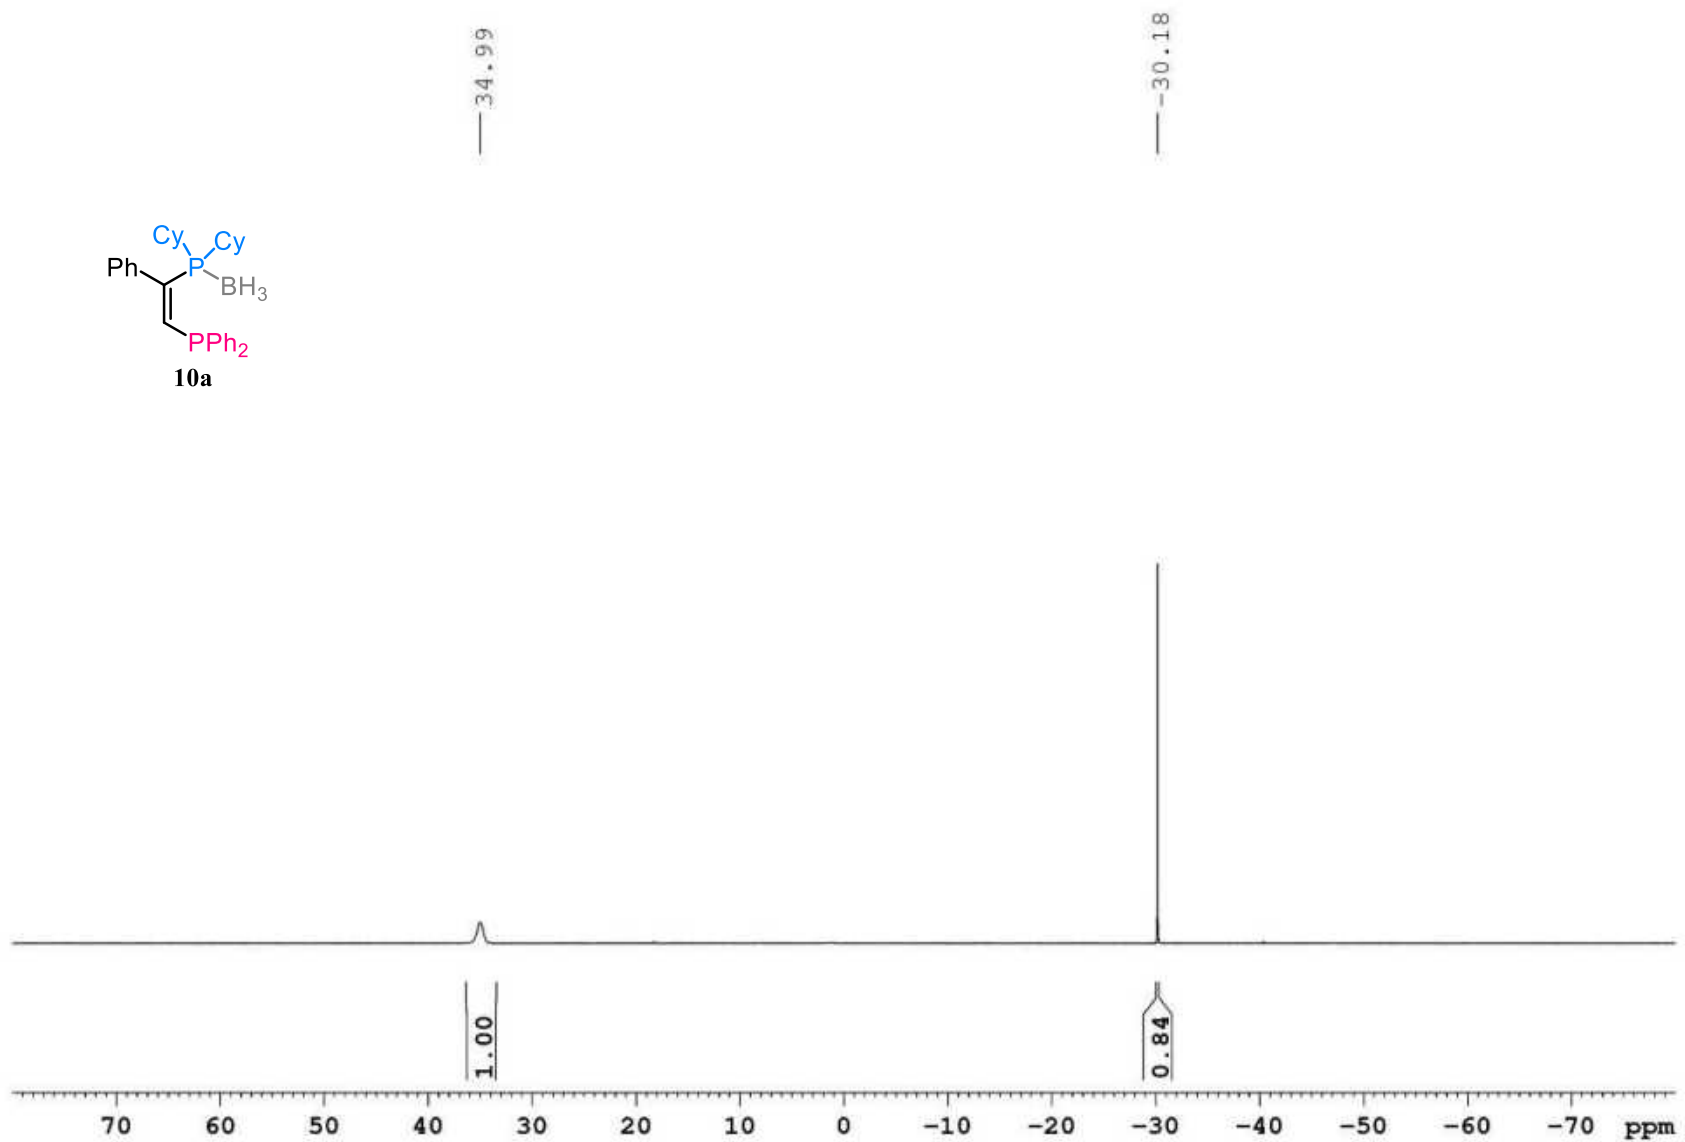

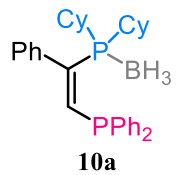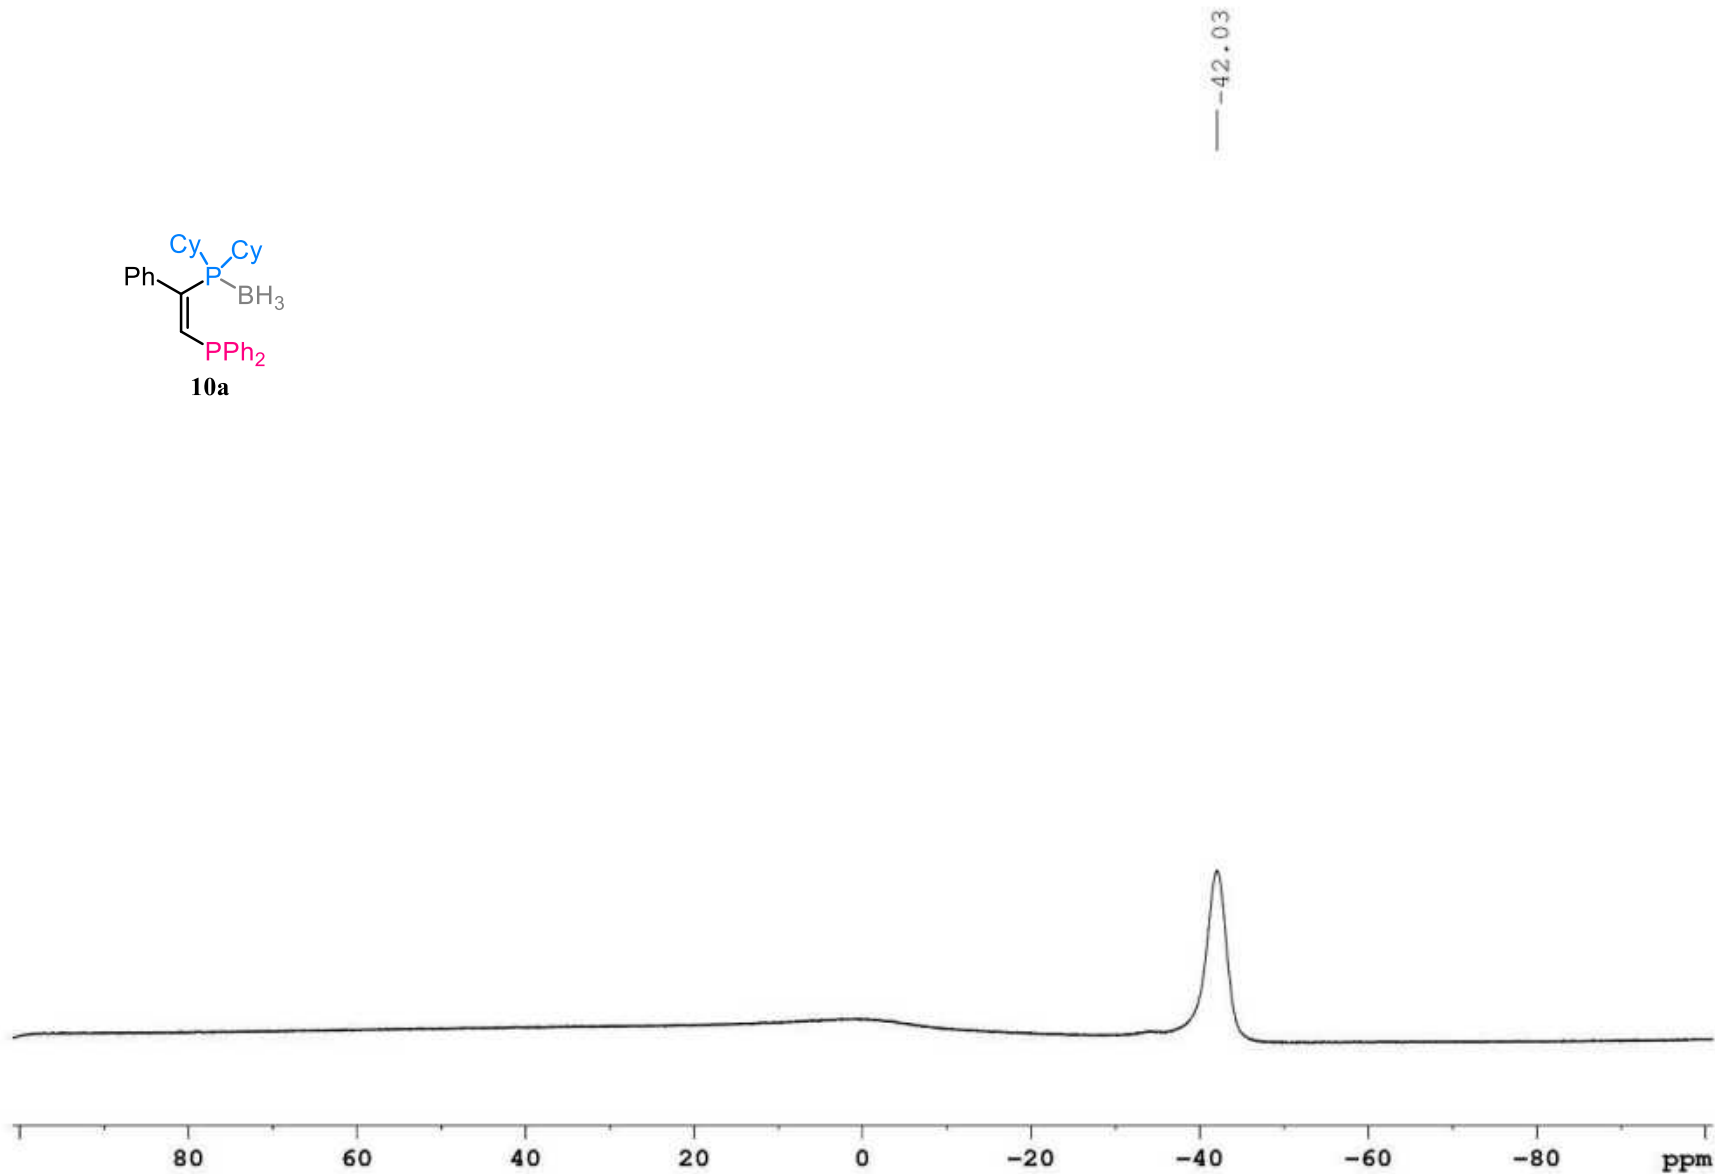

S405

7.32  
7.29  
7.27  
7.26  
7.24  
7.20  
7.19  
7.17  
7.13  
7.12  
7.10  
7.10  
7.06  
7.05

3.17  
3.16  
3.09  
3.08  
3.07  
3.04  
1.87  
1.86  
1.81  
1.79  
1.77  
1.70  
1.69  
1.65  
1.64  
1.63  
1.61  
1.48  
1.44  
1.42  
1.34  
1.32  
1.28  
1.26  
0.69  
0.26  
0.15  
0.01  
-0.00  
-0.01  
-0.03  
-0.08  
-0.09

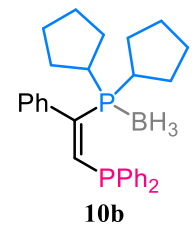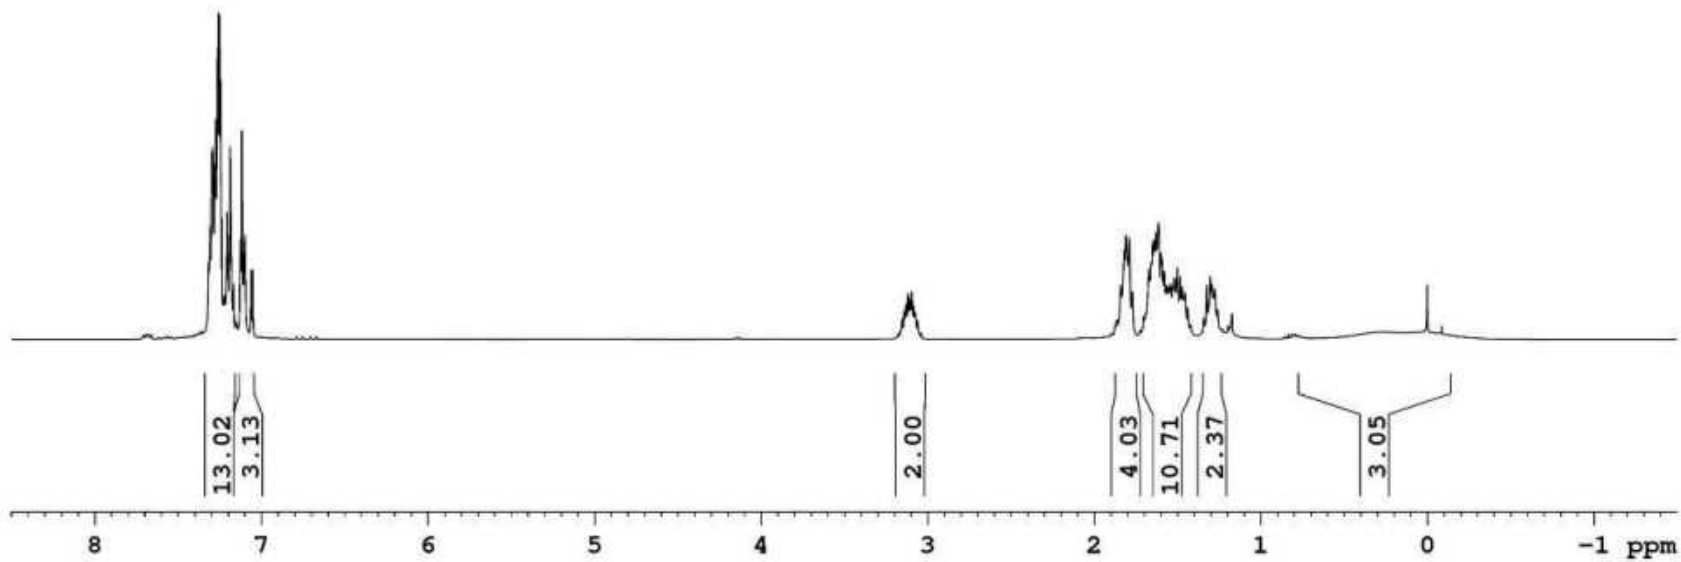

151.44  
151.19  
151.08  
150.83  
146.09  
146.08  
145.90  
145.88  
142.60  
142.50  
142.47  
142.37  
137.19  
137.10  
131.64  
131.45  
128.04  
127.84  
127.77  
127.17  
127.14  
126.55  
126.50

35.71  
35.56  
35.38  
35.23  
28.31  
28.28  
27.42  
27.38  
25.78  
25.68  
24.72  
24.62

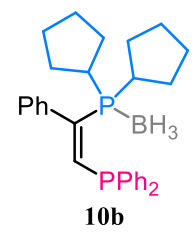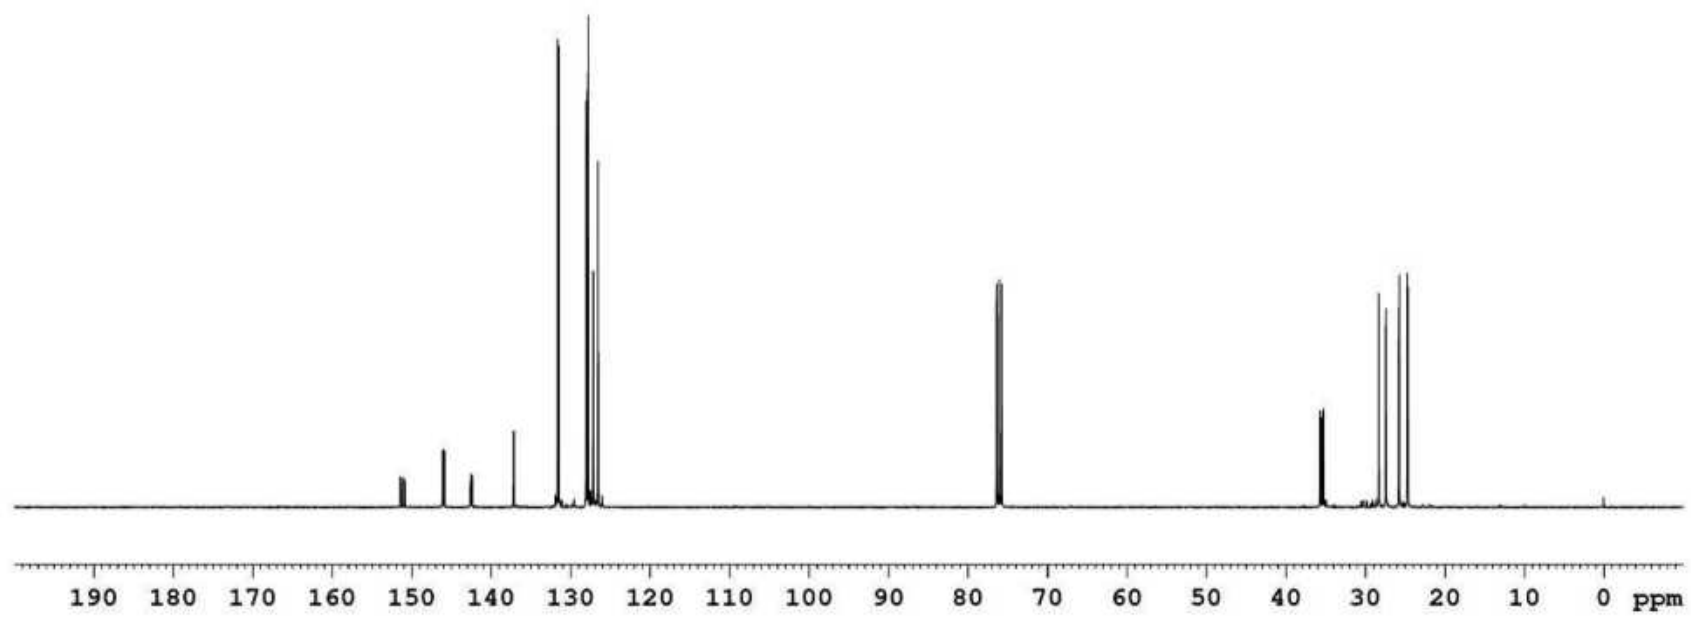

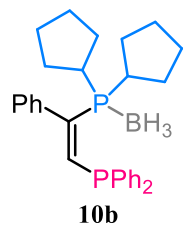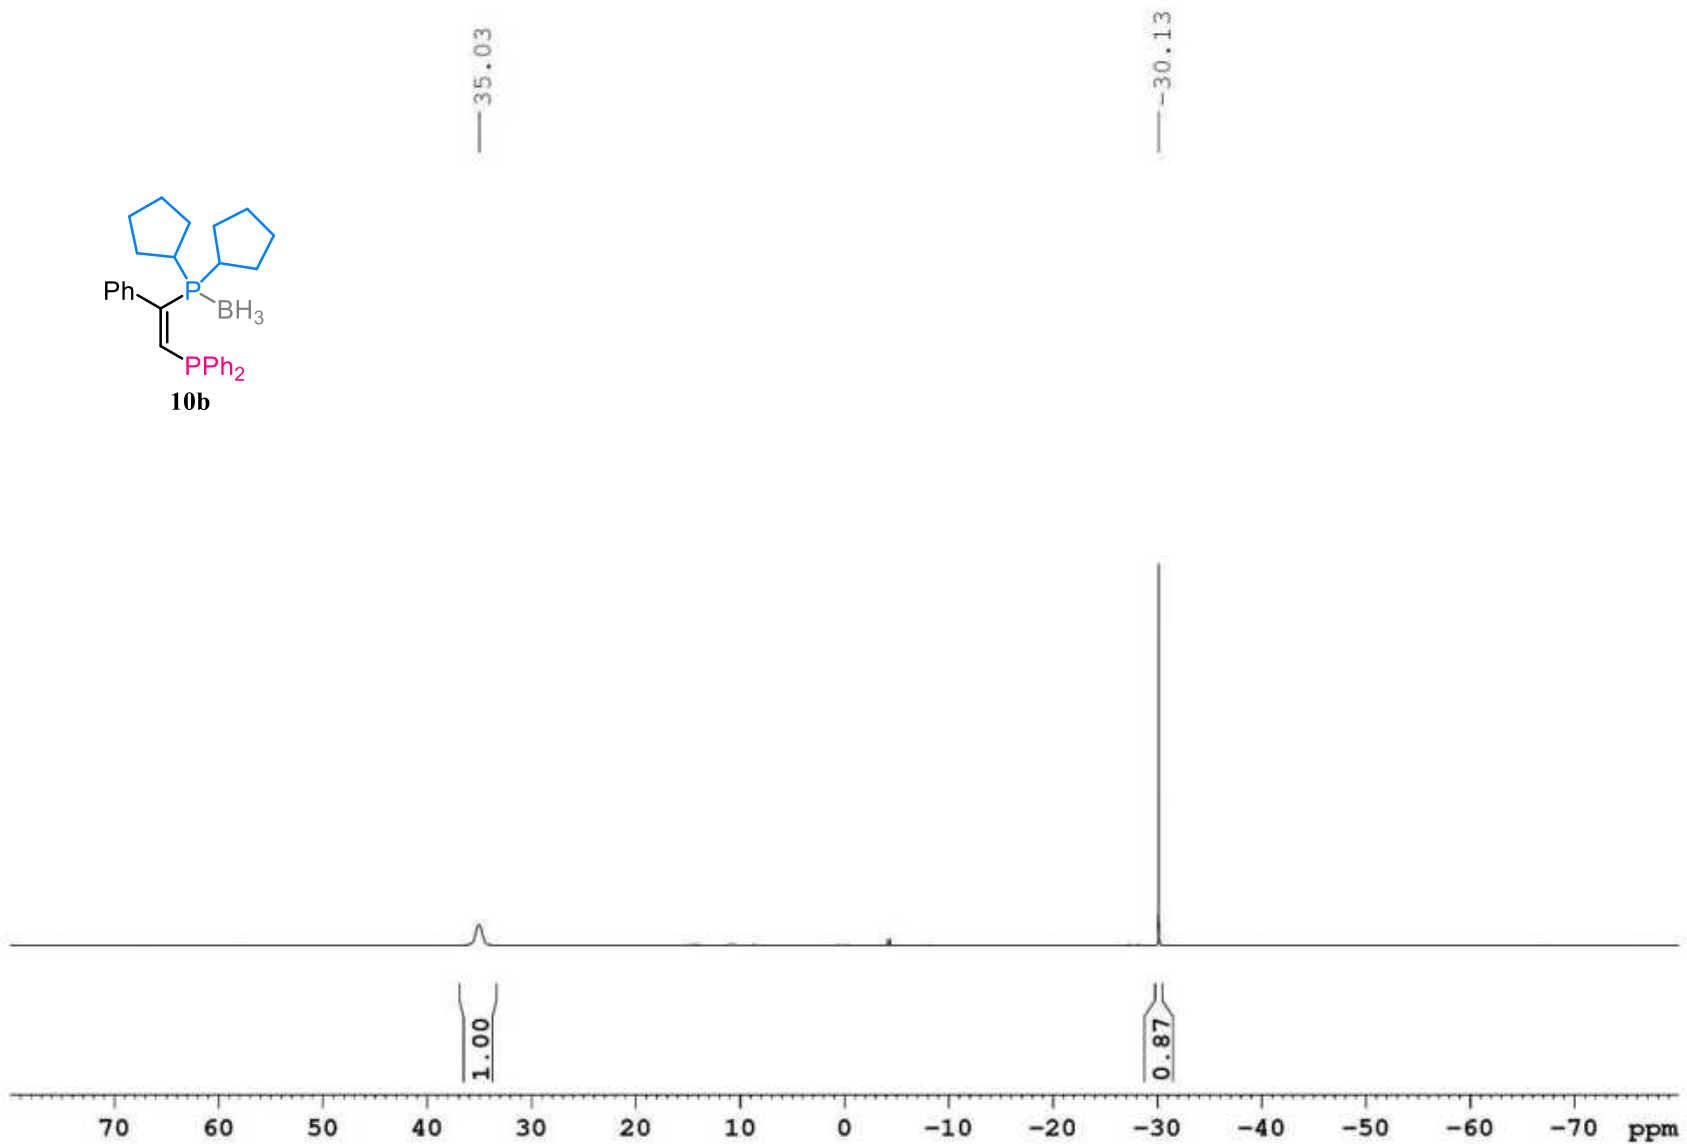

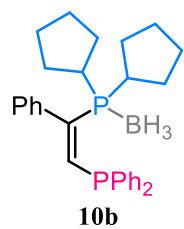

—43.86

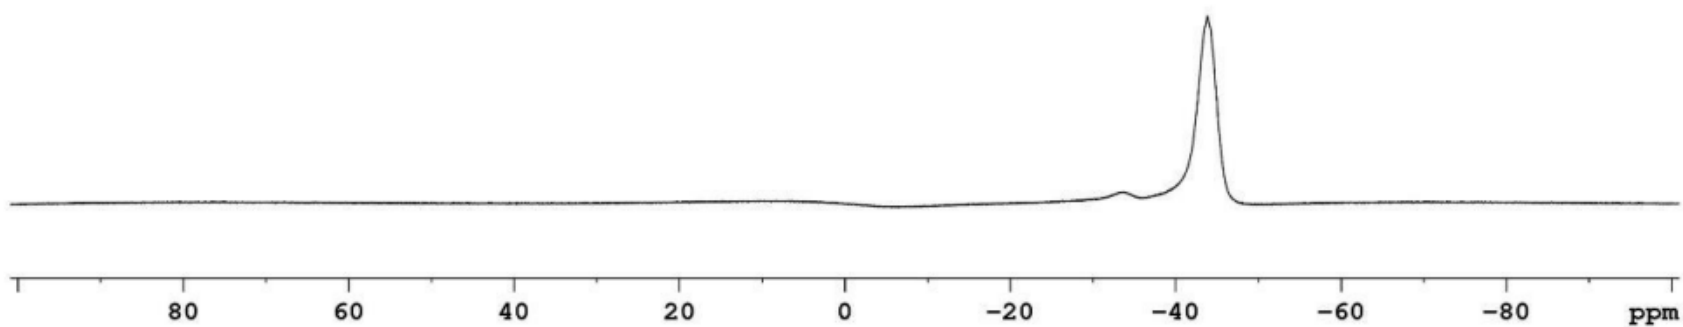



7.52  
7.50  
7.49  
7.48  
7.48  
7.42  
7.41  
7.38  
7.37  
7.35  
7.34  
7.33  
7.31  
7.26  
7.22  
7.21  
7.15  
7.14

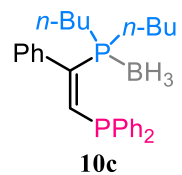

2.12  
2.09  
2.07  
2.05  
1.54  
1.52  
1.50  
1.48  
1.45  
1.34  
1.32  
1.30  
1.25  
1.06  
0.92  
0.86  
0.84  
0.83  
0.70  
0.67  
0.27

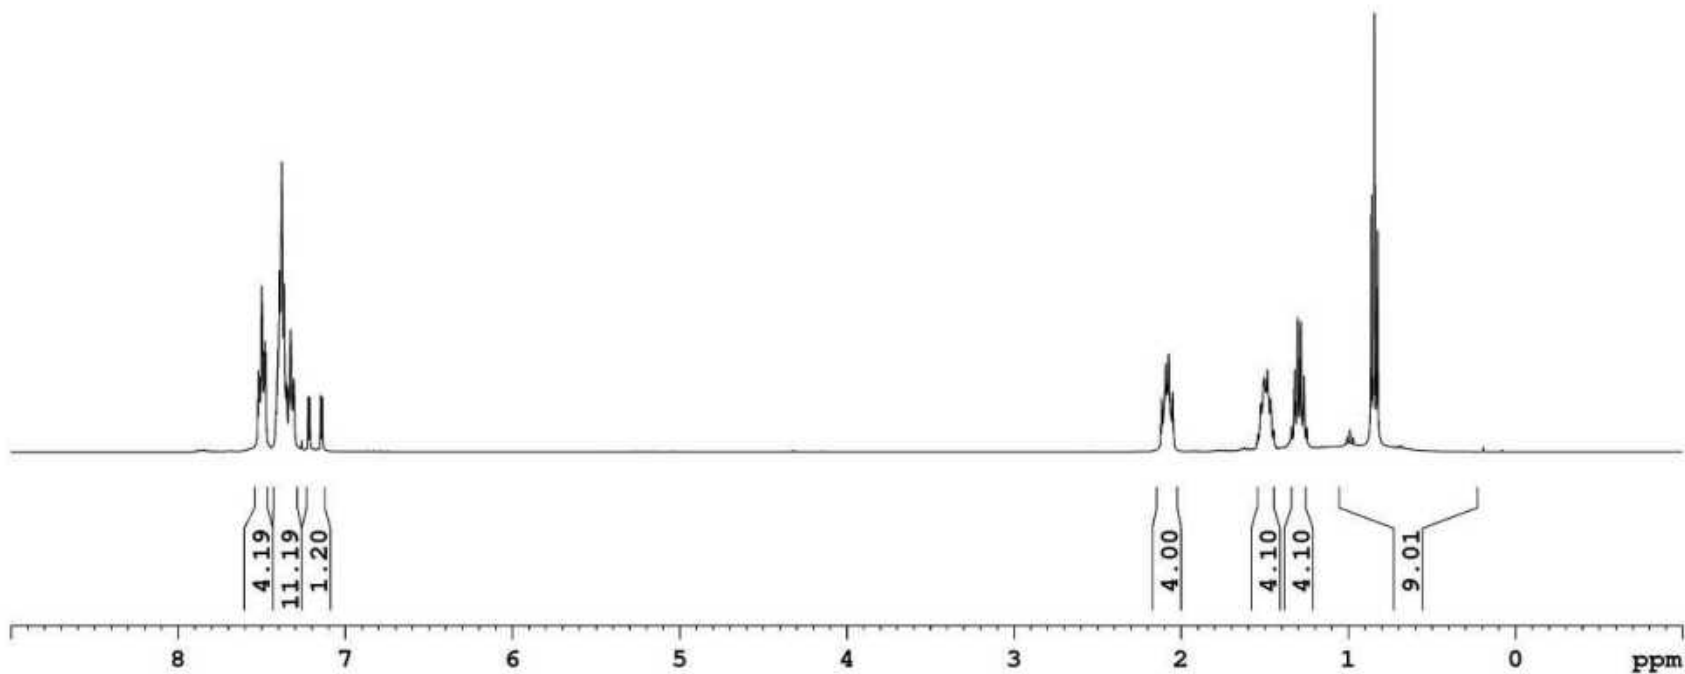

150.53  
150.27  
150.16  
149.89  
146.82  
146.75  
146.62  
146.54  
142.57  
142.47  
142.37  
138.20  
138.11  
132.93  
132.74  
129.04  
128.88  
128.81  
128.24  
127.95  
127.83  
127.80

25.82  
25.70  
25.48  
25.36  
25.22  
25.20  
24.36  
24.23  
13.63

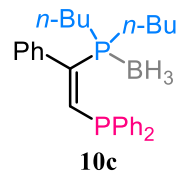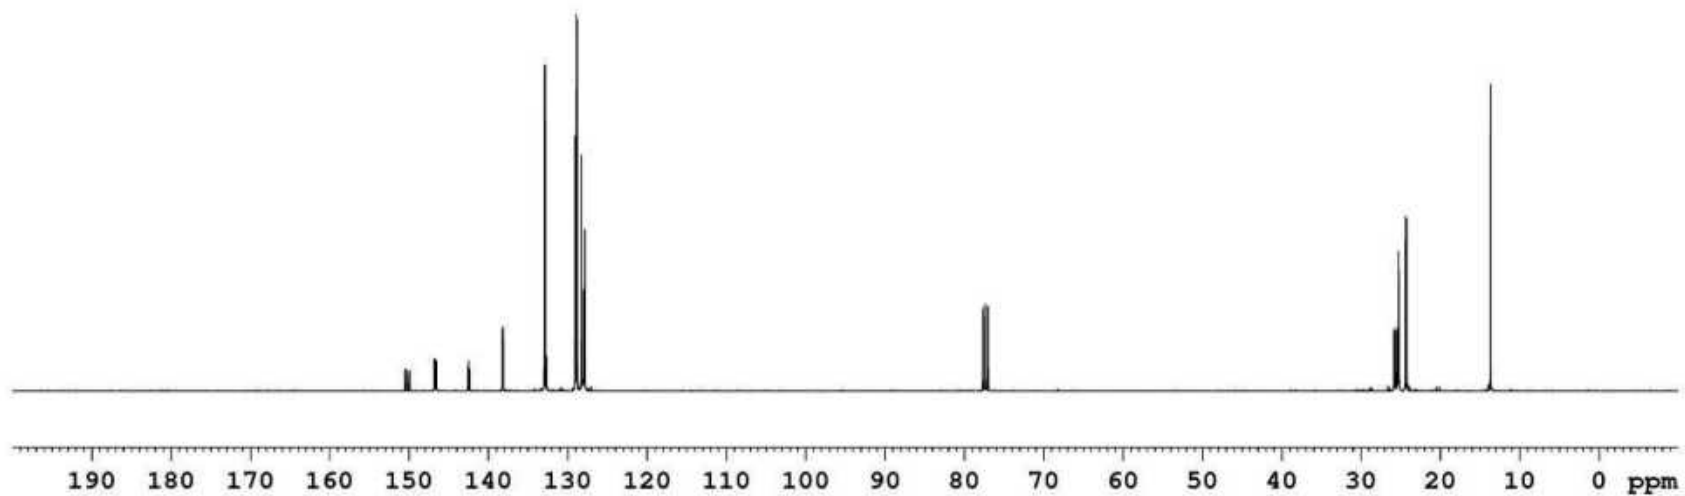

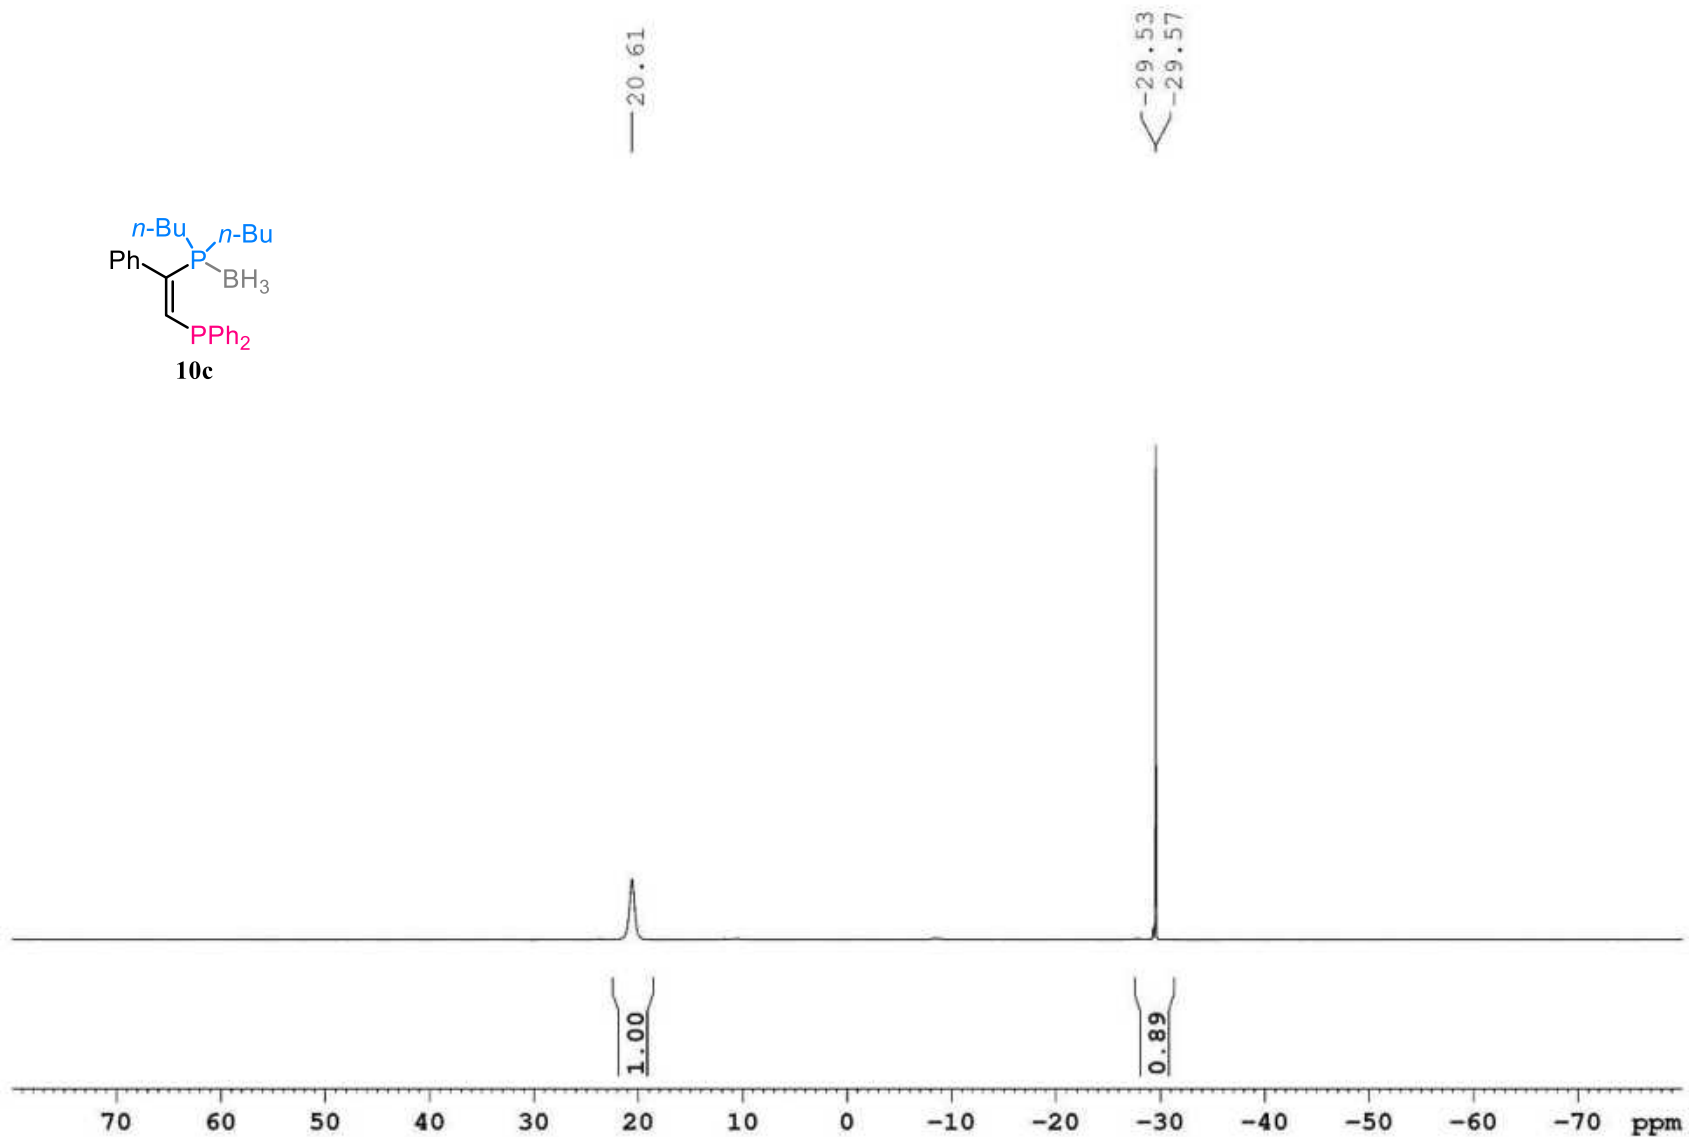



— -36.64

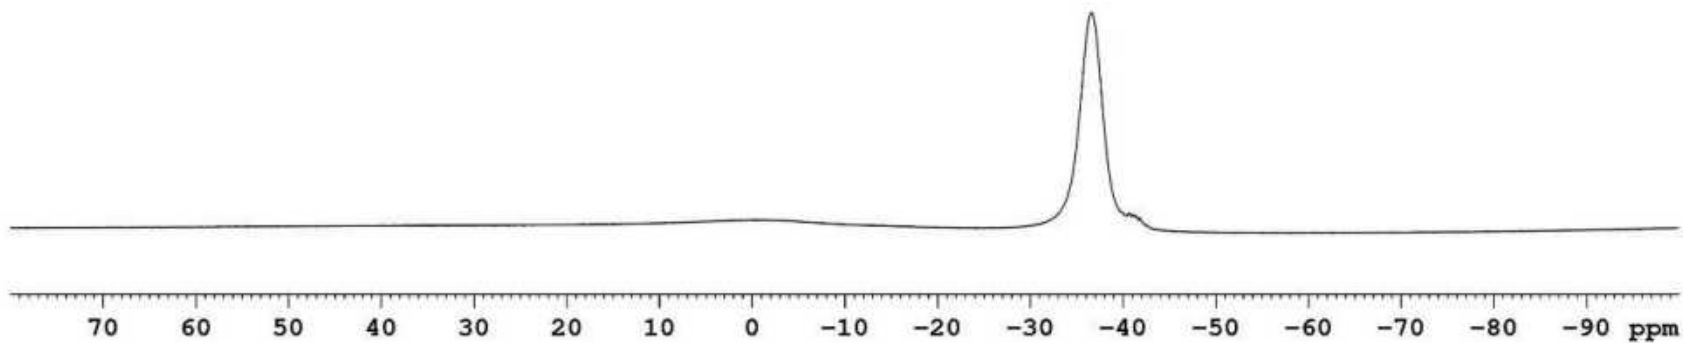

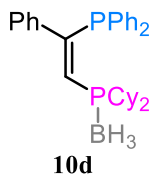

7.36  
 7.34  
 7.33  
 7.28  
 7.27  
 7.14  
 7.12  
 7.10  
 7.05  
 7.03  
 7.02  
 6.81  
 6.79  
 6.60  
 6.56  
 6.50  
 6.47

2.38  
 2.35  
 2.32  
 2.29  
 2.06  
 2.03  
 1.99  
 1.96  
 1.88  
 1.85  
 1.82  
 1.75  
 1.73  
 1.71  
 1.61  
 1.57  
 1.55  
 1.52  
 1.31  
 1.28  
 1.26  
 1.23  
 1.21  
 0.91  
 0.61

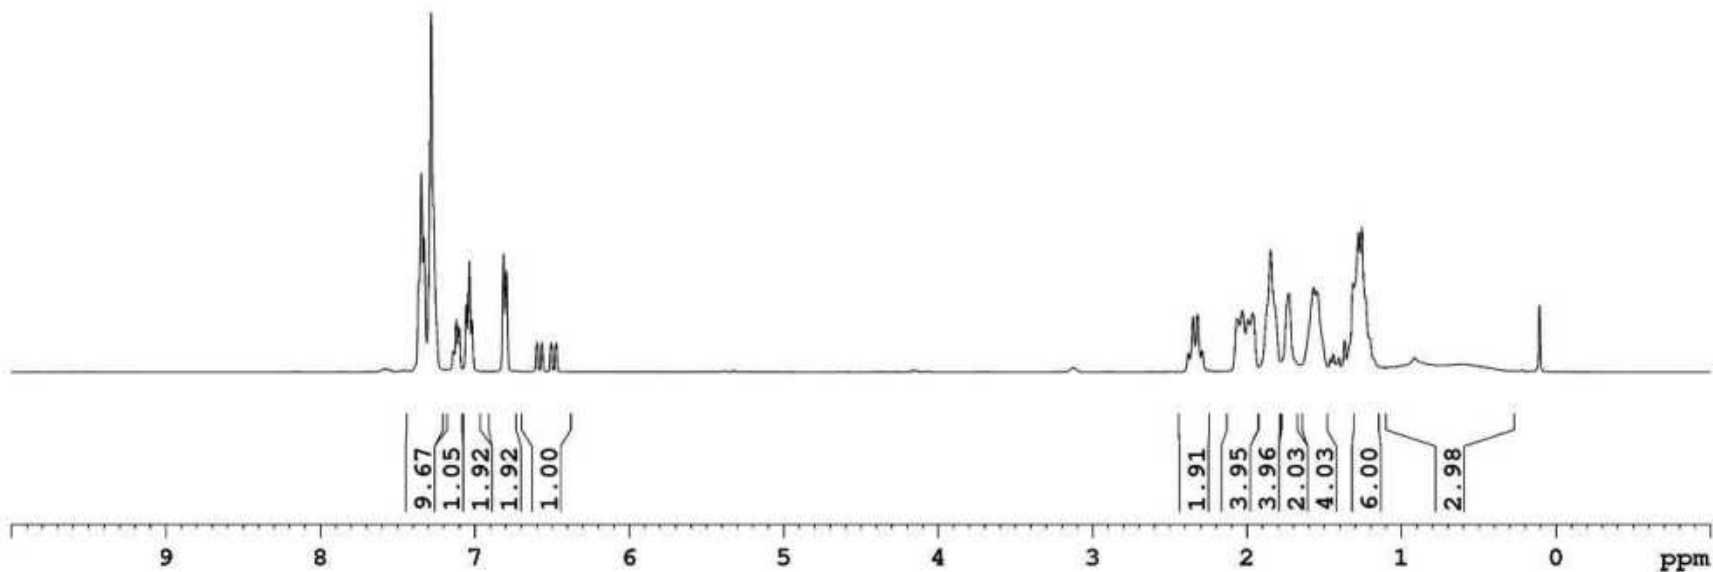

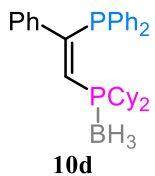

160.21  
159.89  
142.85  
142.81  
142.72  
142.68  
137.22  
136.83  
136.80  
136.41  
135.47  
135.34  
133.51  
133.32  
128.58  
128.23  
128.17  
127.82  
127.53  
127.43

34.85  
34.79  
34.52  
34.46  
27.49  
27.40  
26.97  
26.86  
26.00

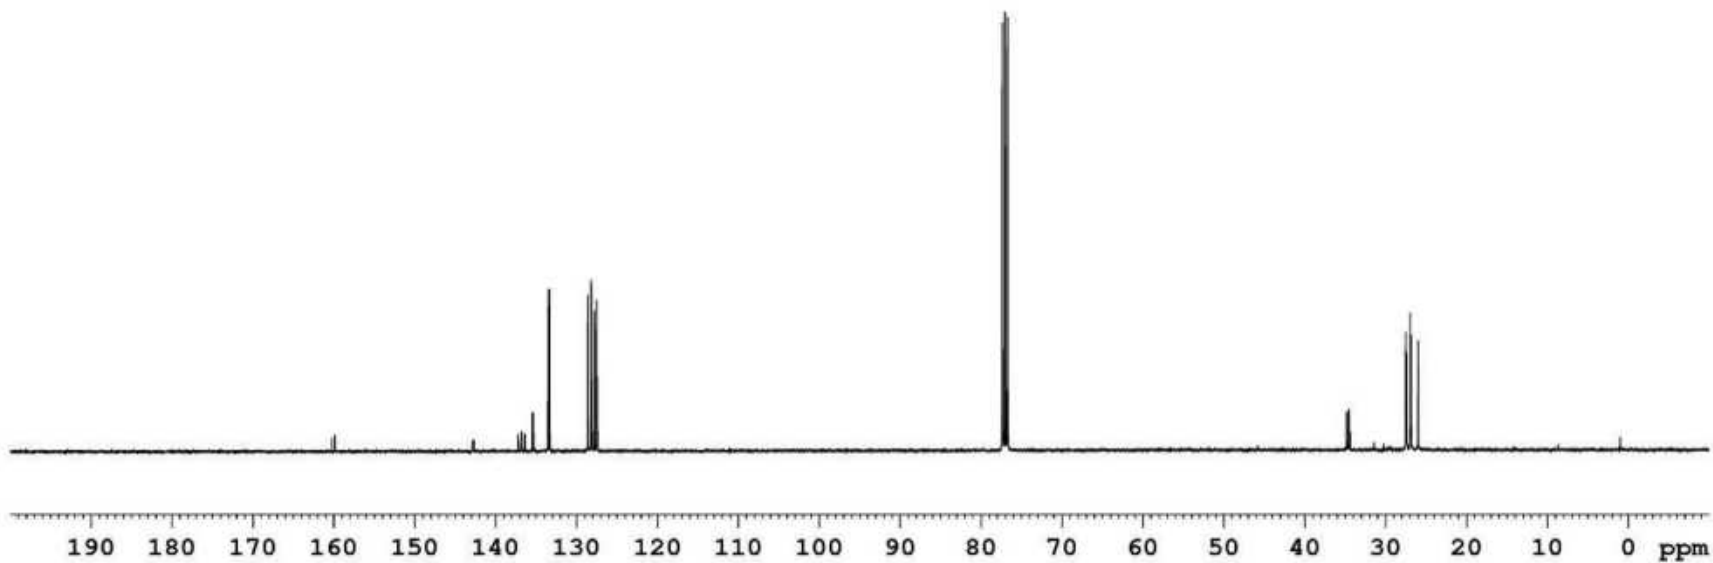

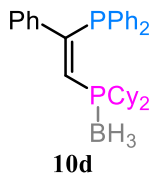

— 21.70

< -5.68  
< -5.77

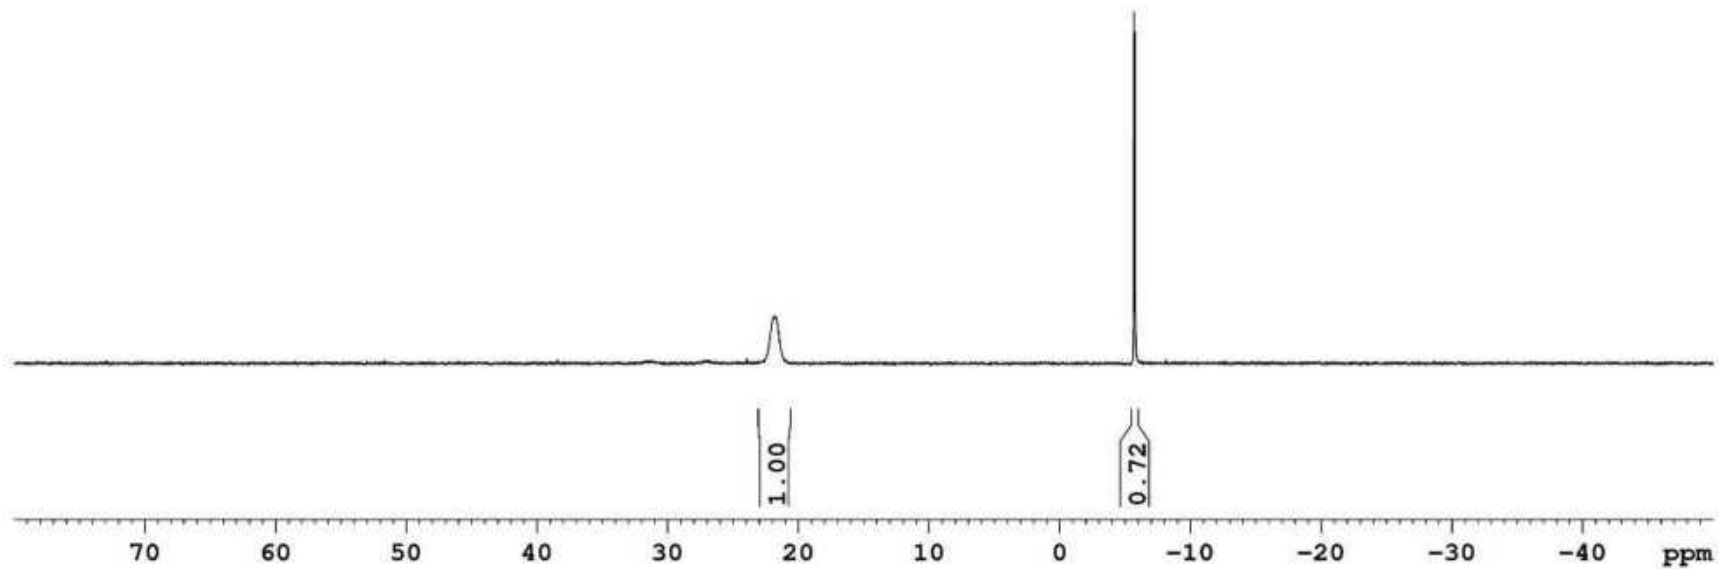



-39.64

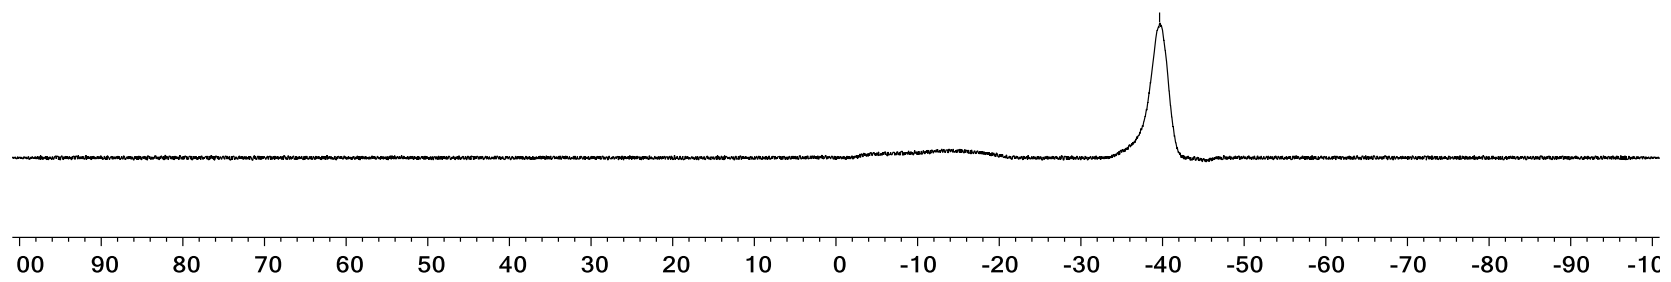



7.26  
7.24  
7.22  
7.20  
7.14  
7.12  
7.10  
7.06  
7.04  
7.02  
6.80  
6.78  
6.75  
6.73  
6.46  
6.43  
6.37  
6.34

3.78  
2.39  
2.36  
2.33  
2.30  
2.04  
2.01  
1.97  
1.94  
1.87  
1.83  
1.80  
1.74  
1.72  
1.69  
1.55  
1.54  
1.53  
1.52  
1.30  
1.26  
1.24  
1.21  
0.98  
0.89  
0.87  
0.87  
0.85  
0.73  
0.69  
0.67  
0.33

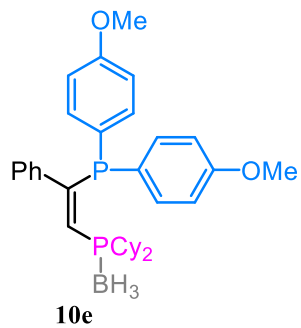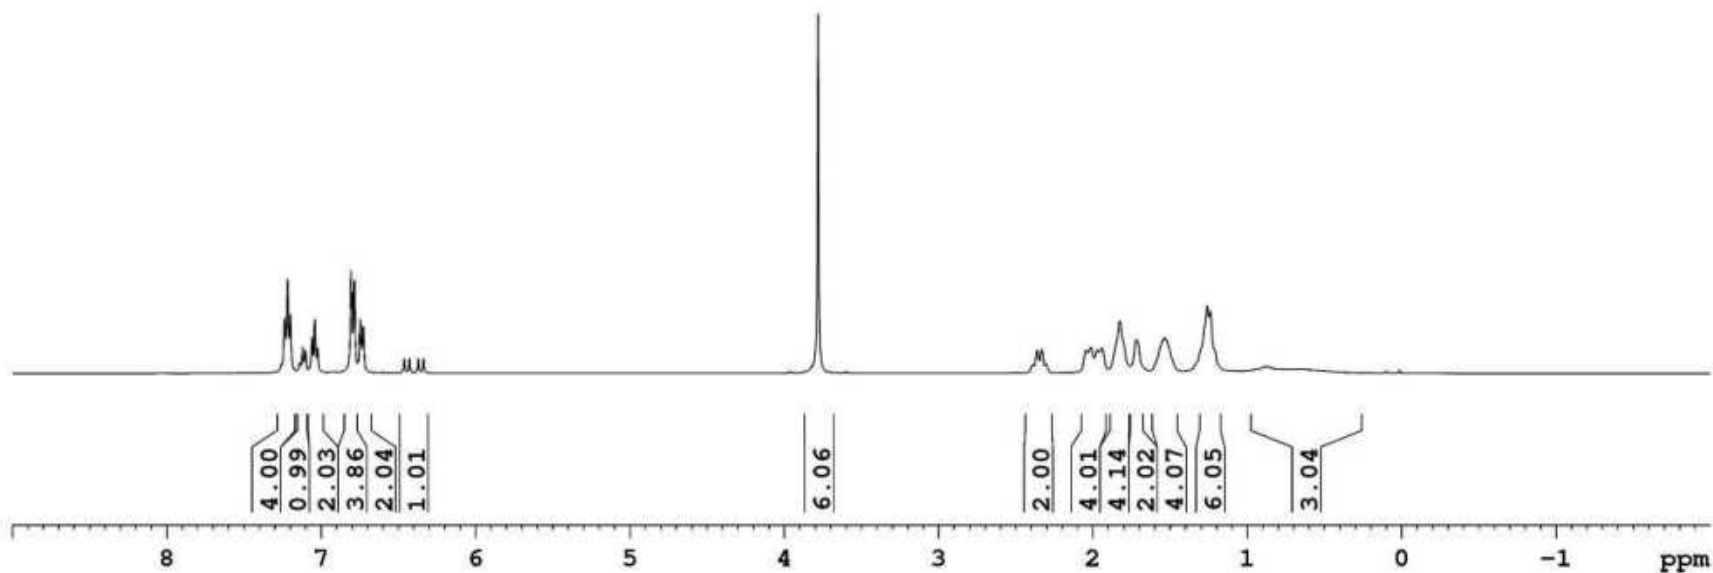

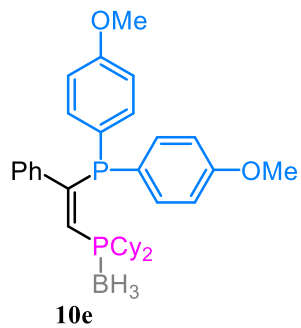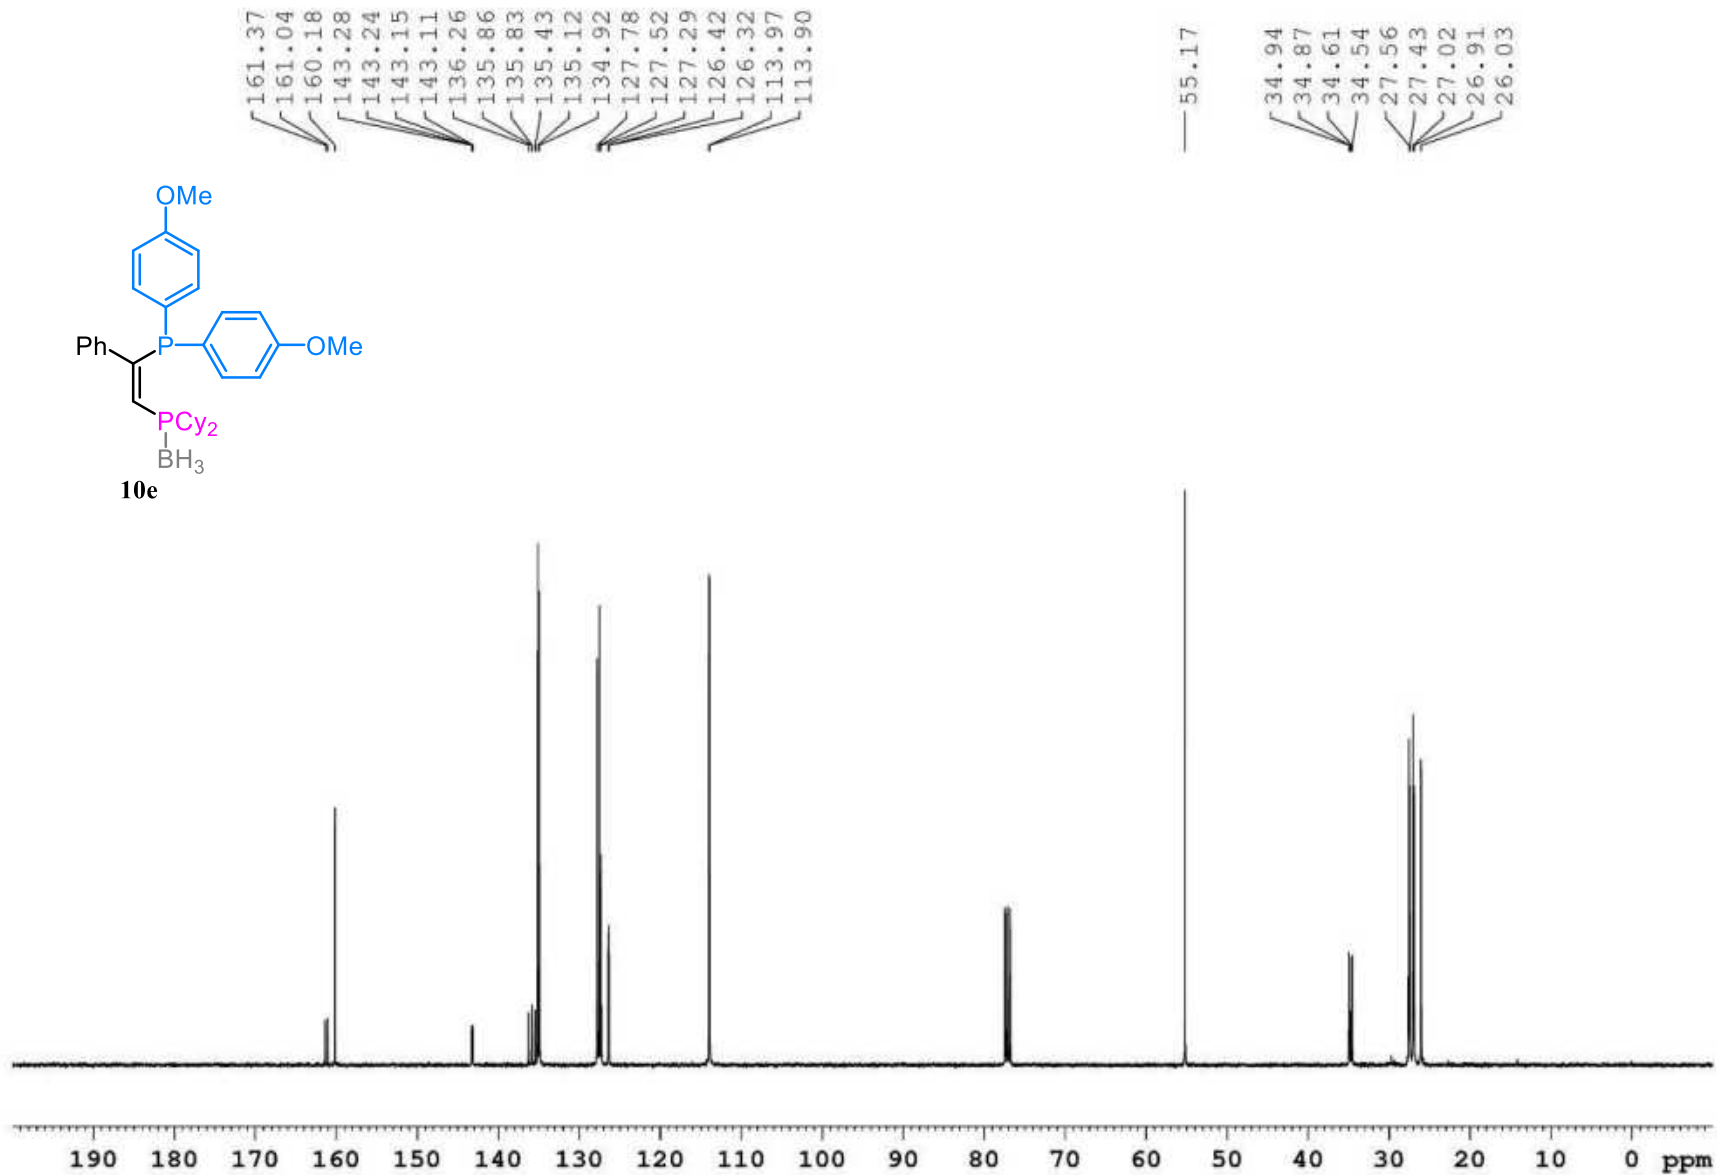

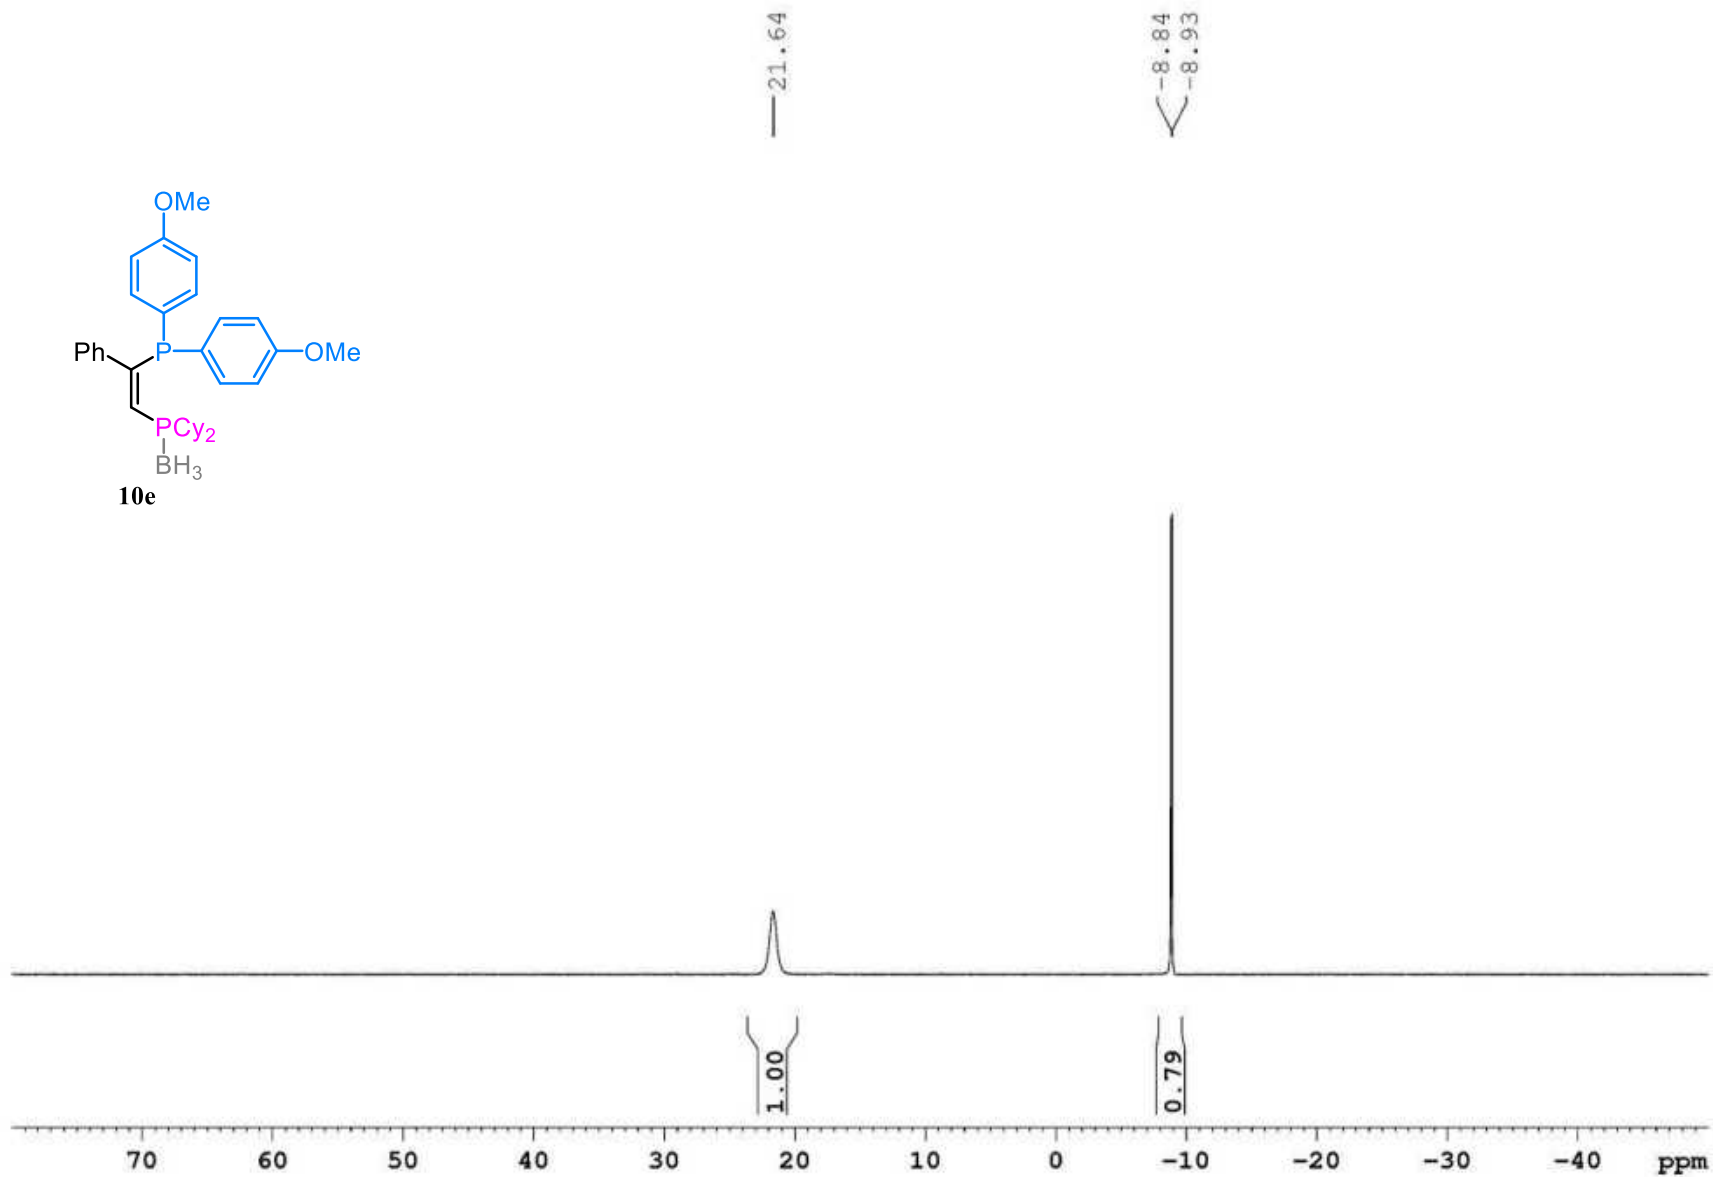

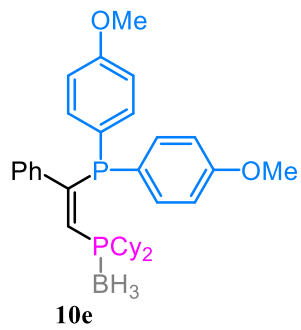

— -39.62

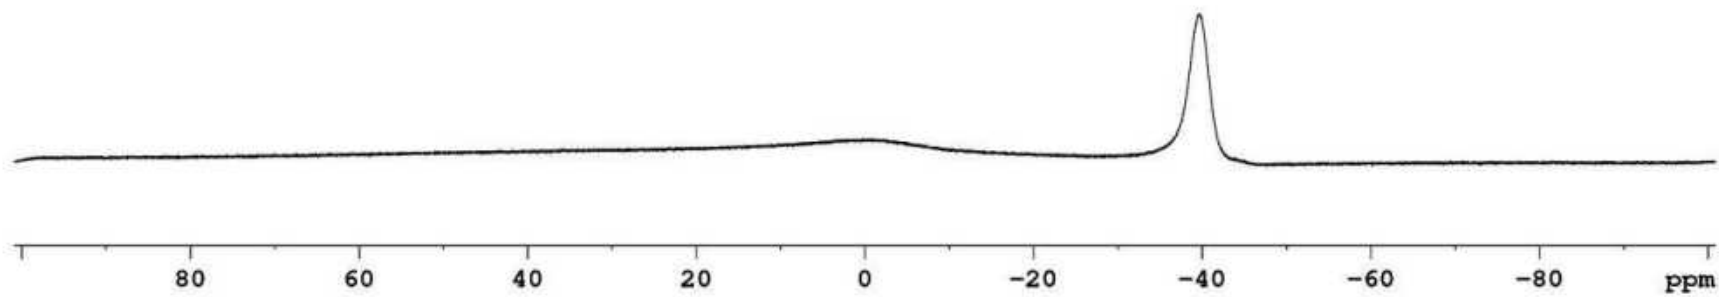

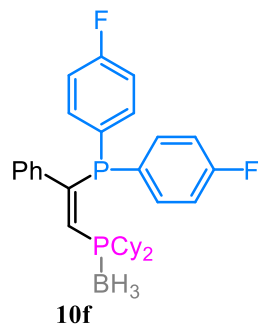

7.29  
 7.27  
 7.27  
 7.26  
 7.25  
 7.23  
 7.14  
 7.12  
 7.10  
 7.05  
 7.04  
 7.02  
 6.96  
 6.94  
 6.94  
 6.92  
 6.70  
 6.69  
 6.53  
 6.51  
 6.44  
 6.42

2.24  
 2.21  
 2.19  
 2.16  
 2.05  
 2.03  
 2.01  
 1.95  
 1.92  
 1.84  
 1.73  
 1.57  
 1.53  
 1.47  
 1.30  
 1.24  
 1.21  
 0.94  
 0.92  
 0.92  
 0.76  
 0.55  
 0.34

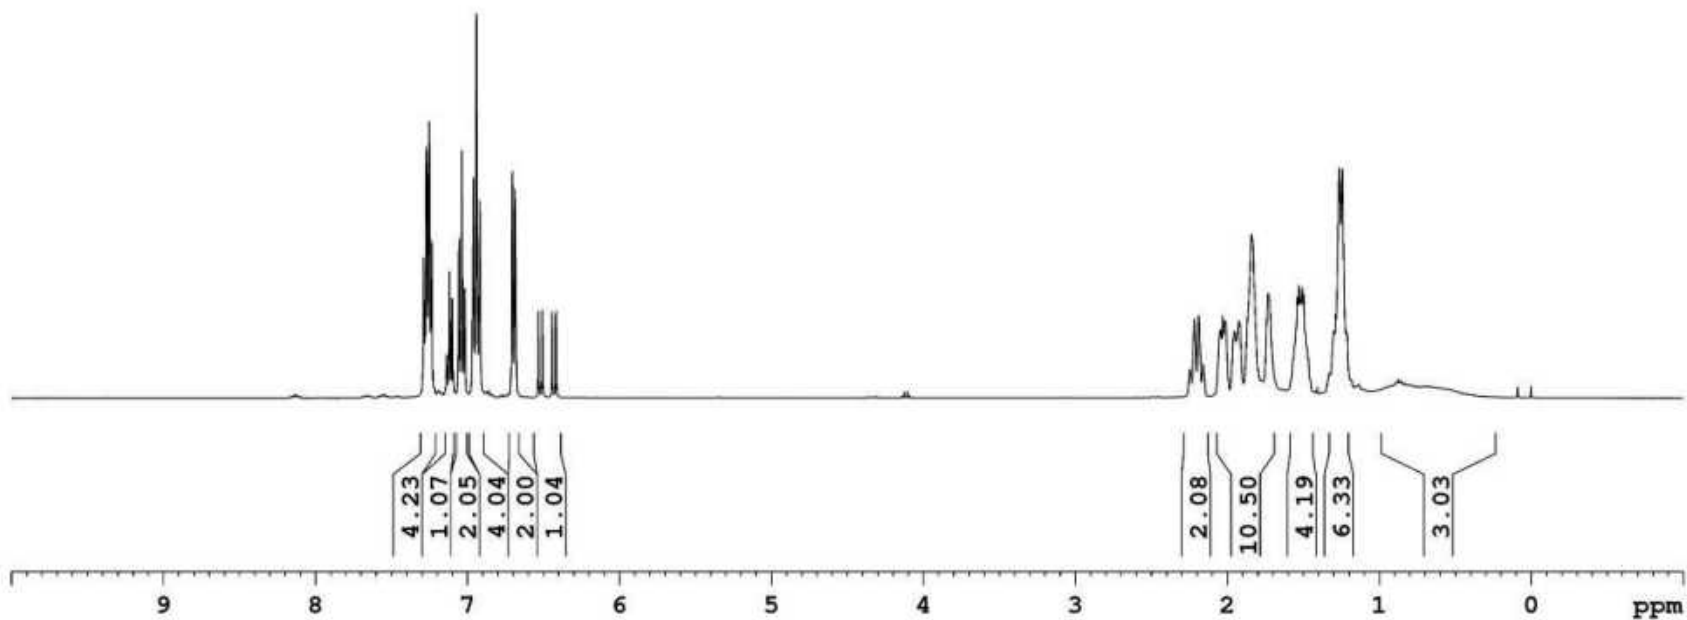

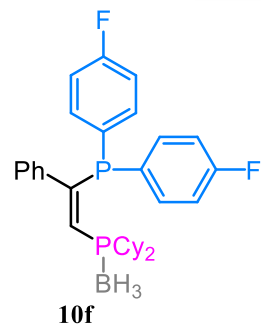

164.52  
 162.04  
 160.54  
 160.51  
 160.21  
 160.18  
 142.80  
 142.75  
 142.67  
 142.63  
 137.09  
 136.69  
 136.28  
 135.56  
 135.48  
 135.35  
 135.27  
 131.00  
 130.97  
 130.87  
 130.83  
 127.72  
 127.58  
 127.55  
 115.63  
 115.56  
 115.42  
 115.35

34.79  
 34.74  
 34.46  
 34.42  
 27.34  
 27.28  
 27.05  
 27.01  
 26.94  
 26.89  
 26.04

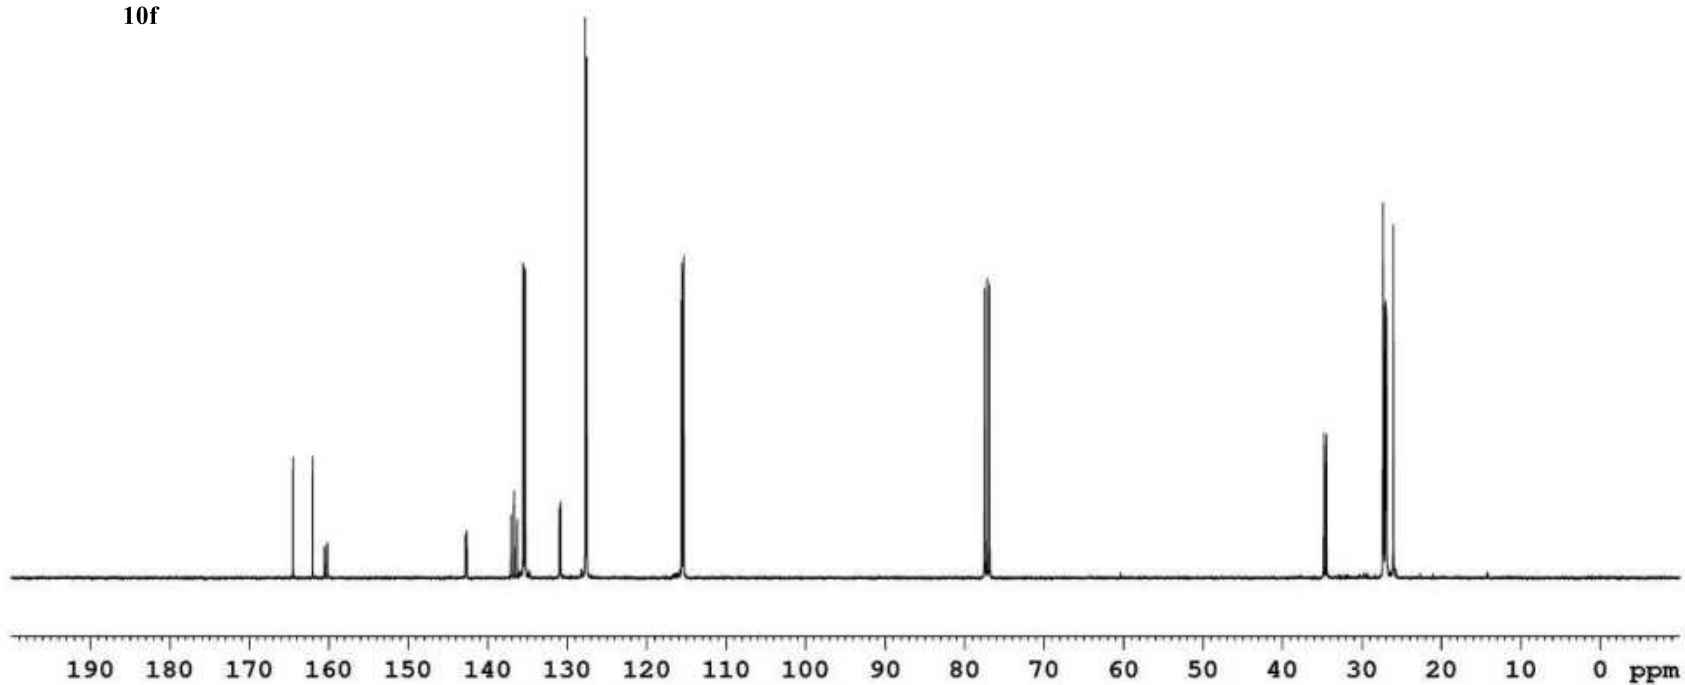

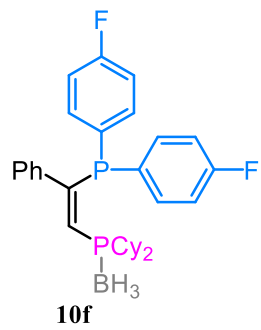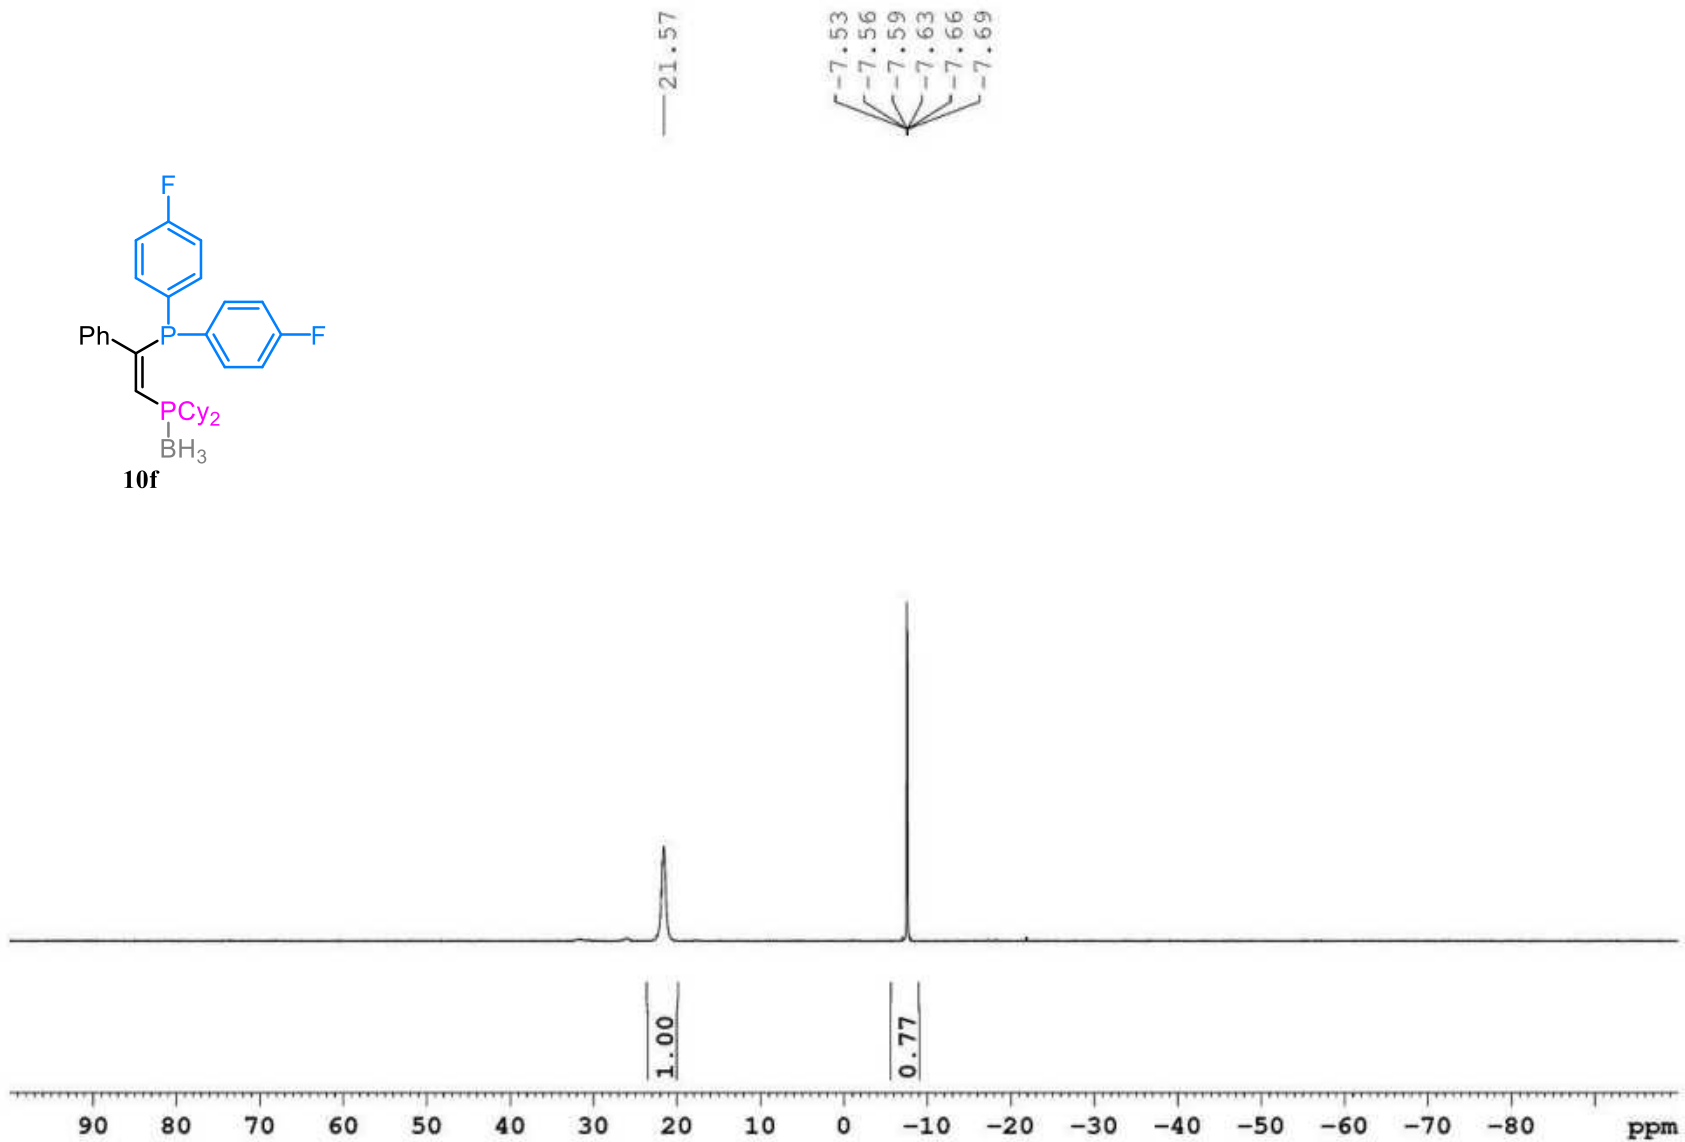



— -39.39

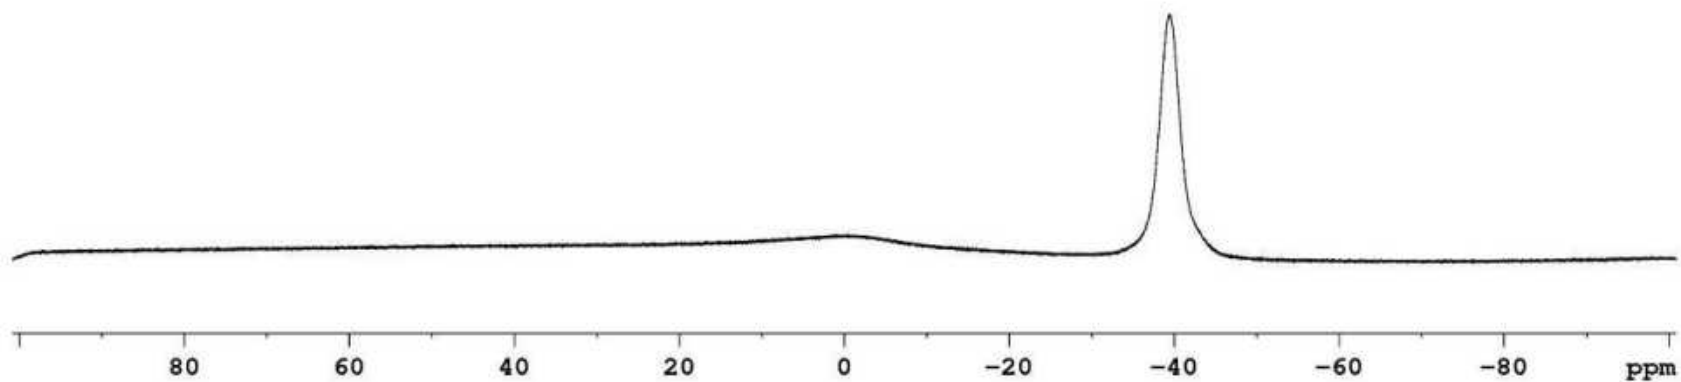



7.26  
7.21  
7.19  
7.17  
7.12  
7.10  
7.08  
7.06  
7.04  
7.02  
7.00  
6.78  
6.77  
6.51  
6.48  
6.42  
6.38

2.39  
2.38  
2.36  
2.33  
2.31  
2.03  
2.00  
1.97  
1.93  
1.84  
1.82  
1.81  
1.79  
1.73  
1.70  
1.68  
1.57  
1.56  
1.55  
1.52  
1.51  
1.50  
1.29  
1.27  
1.26  
1.25  
1.24  
1.22  
0.84  
0.80  
0.77  
0.66  
0.25  
0.23

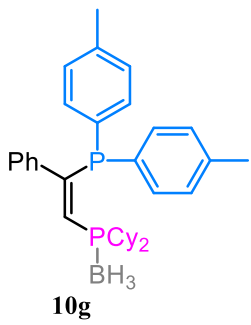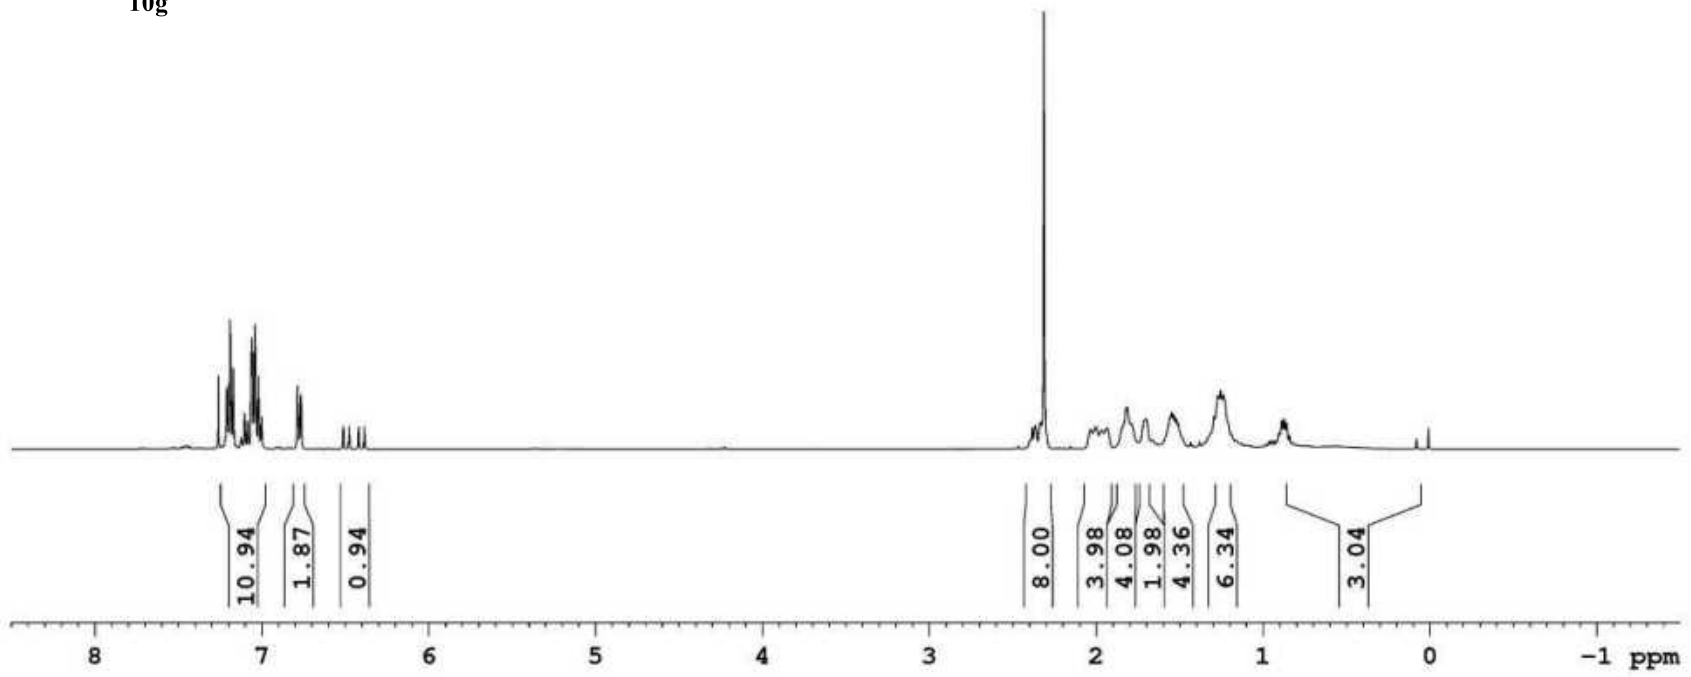

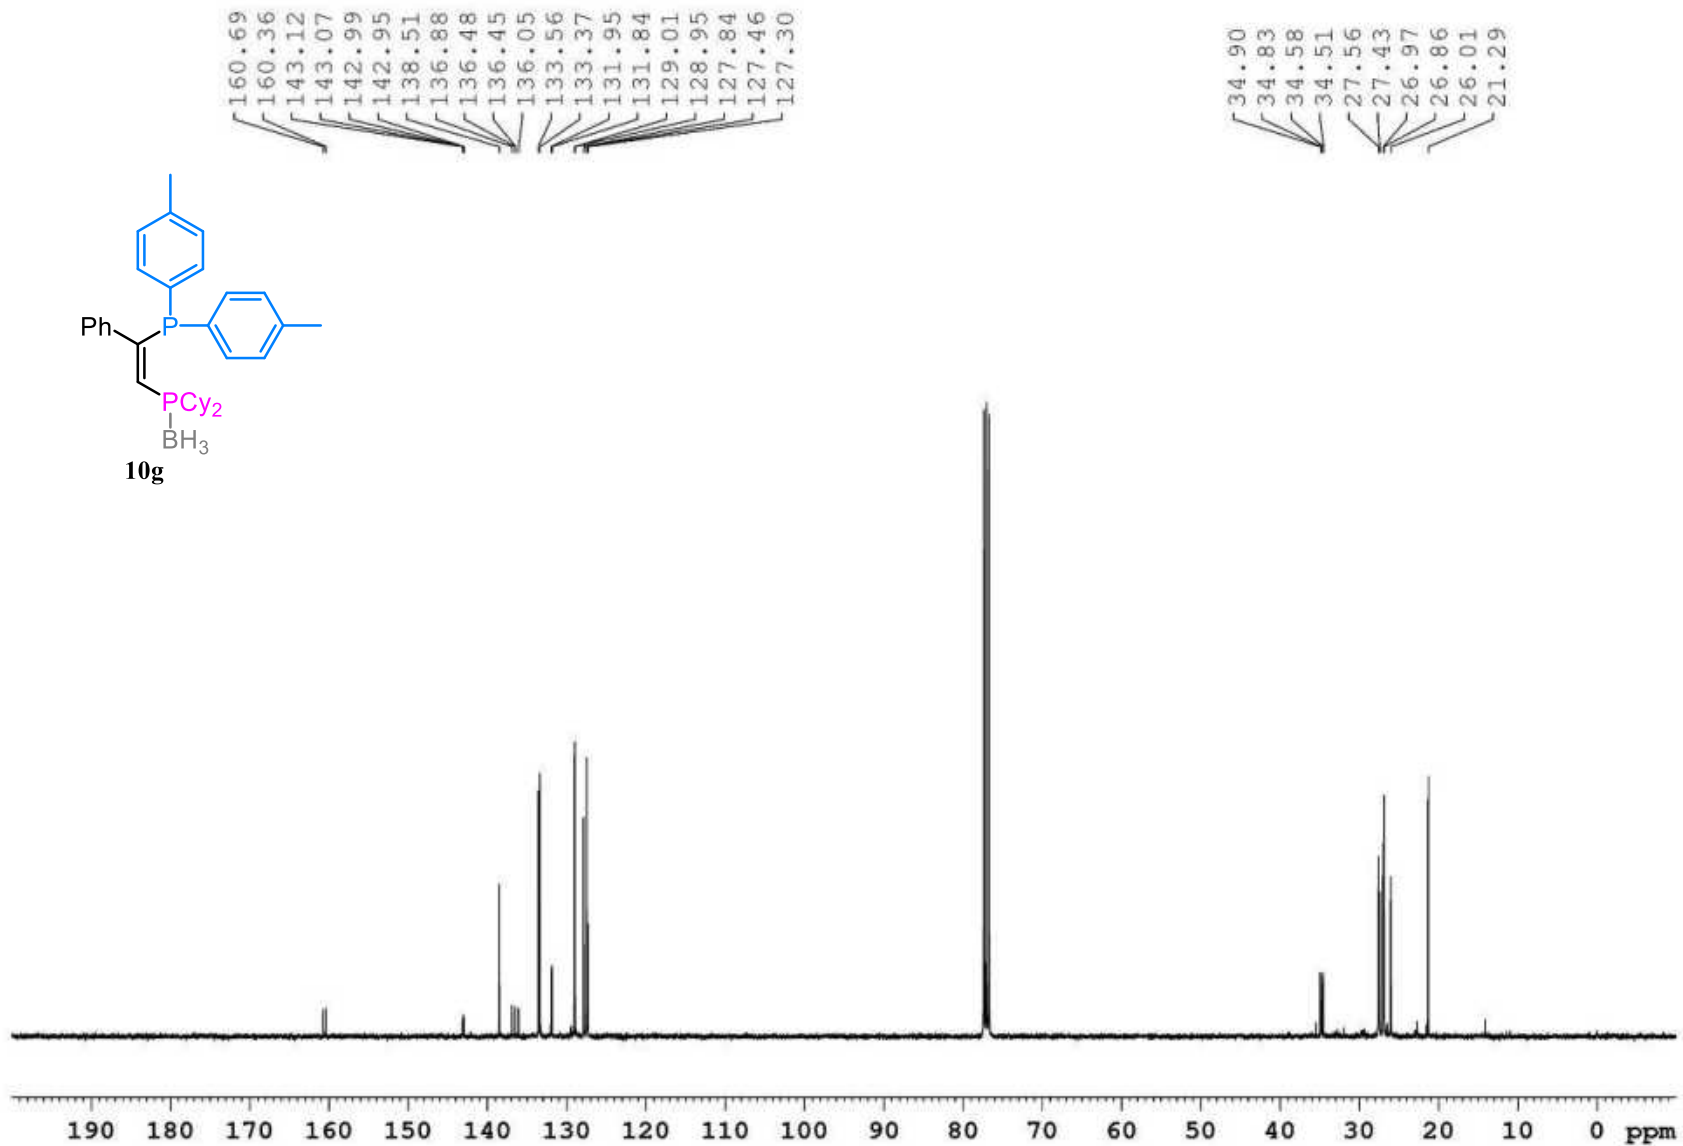

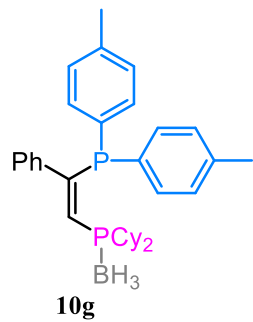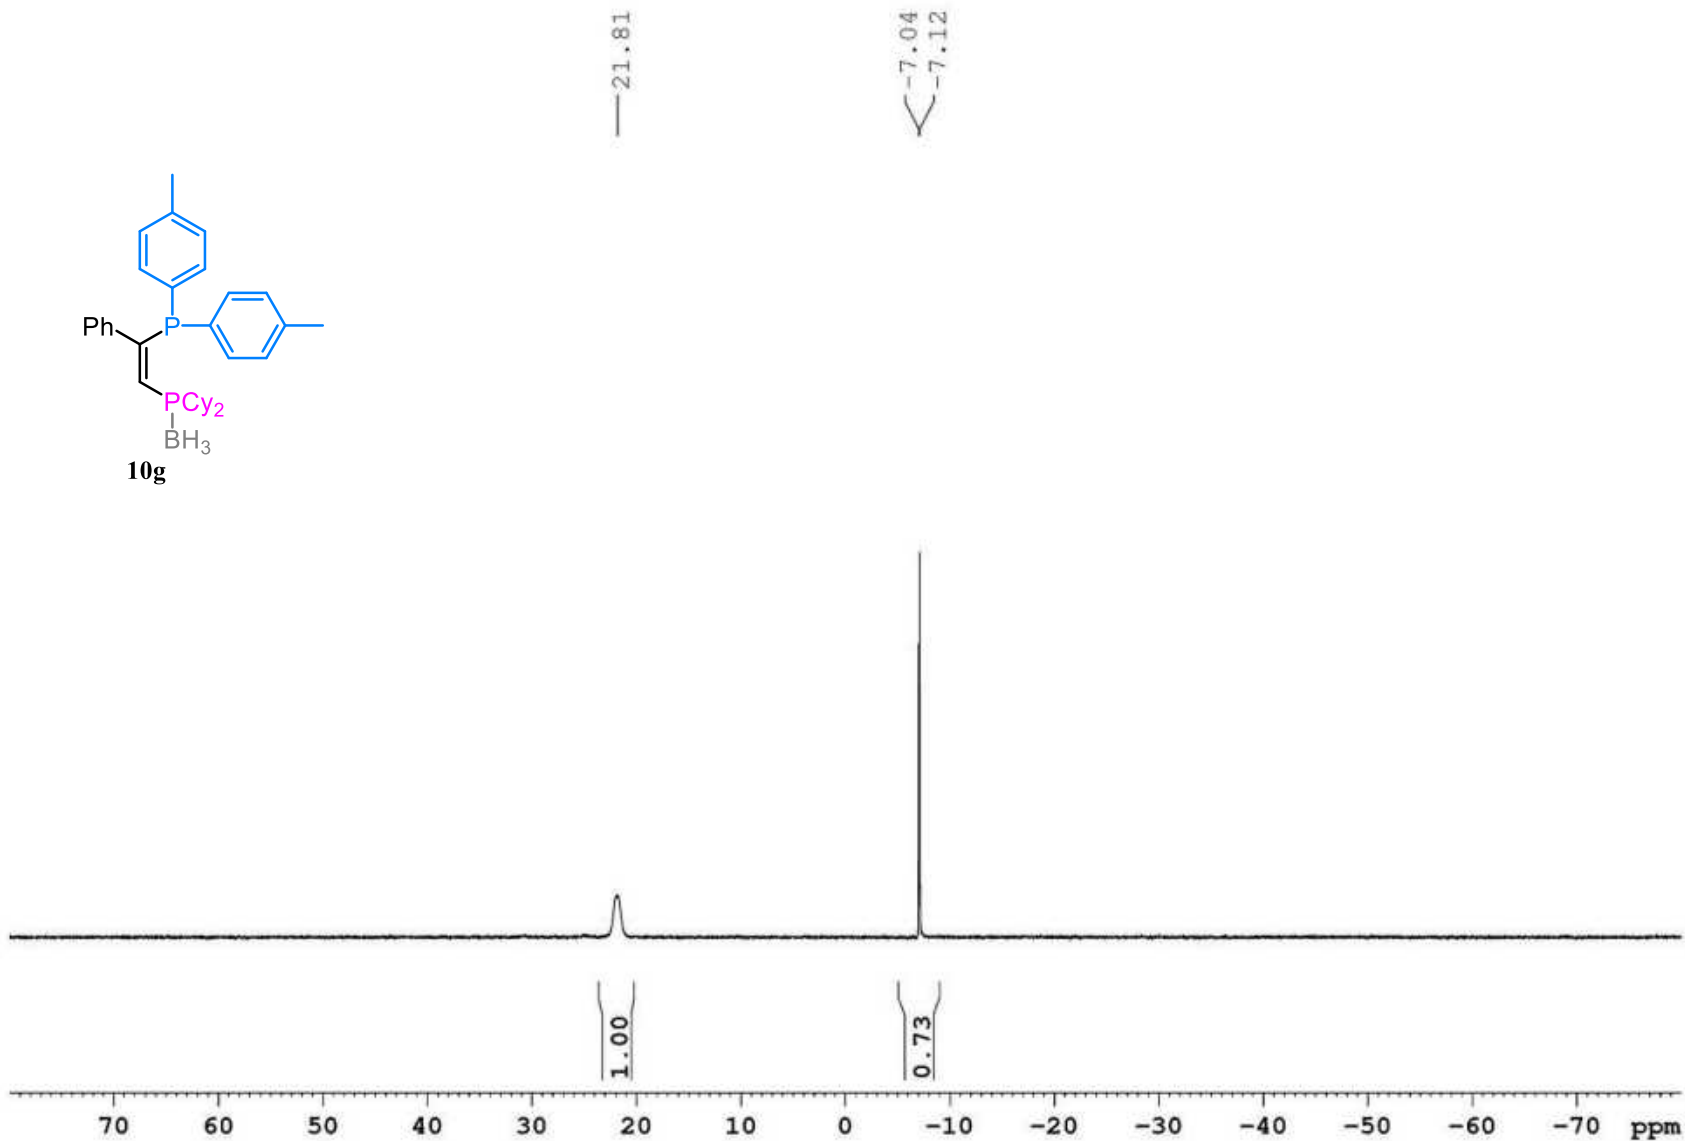

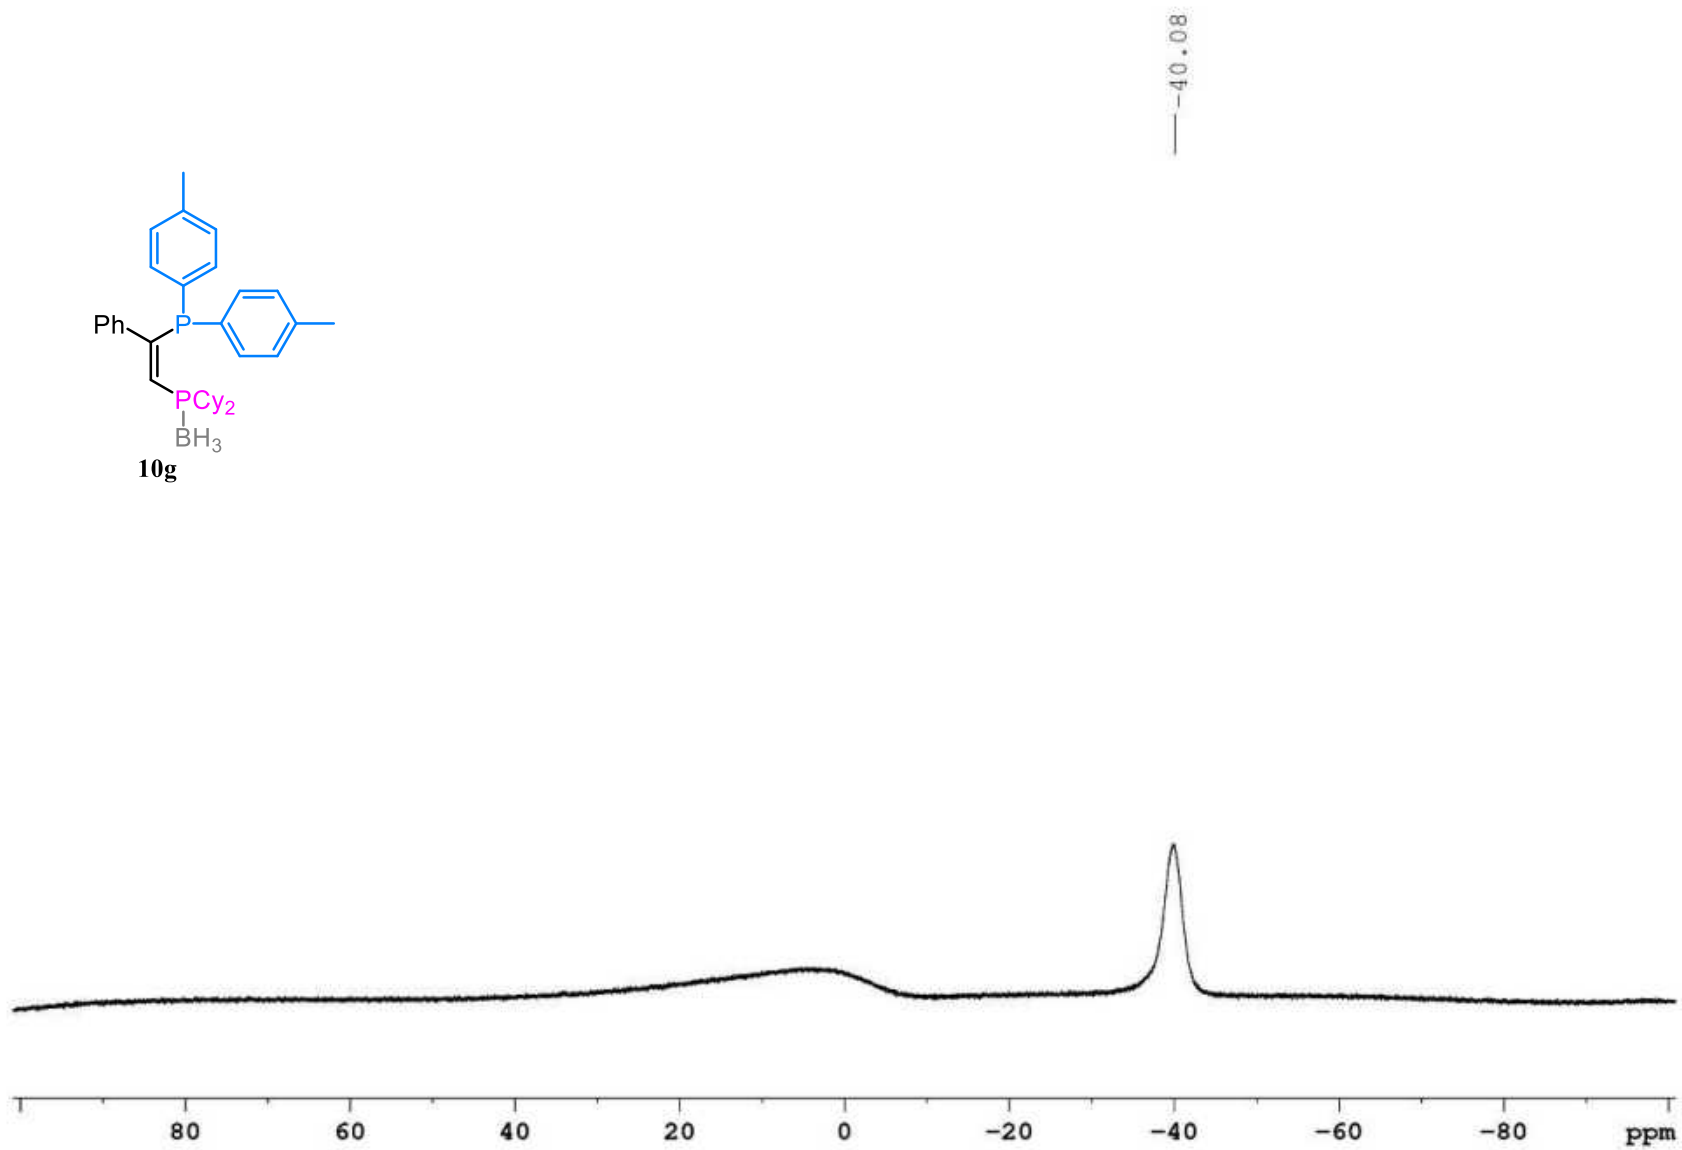

7.27  
7.26  
7.25  
7.22  
7.21  
7.15  
7.13  
7.11  
7.11  
7.07  
7.05  
7.03  
7.01  
7.00  
6.99  
6.99  
6.97  
6.97  
6.94  
6.78  
6.76  
6.76  
6.63  
6.60  
6.54  
6.51

2.23  
2.20  
2.15  
2.14  
2.06  
2.03  
1.97  
1.94  
1.86  
1.74  
1.58  
1.55  
1.52  
1.49  
1.34  
1.31  
1.28  
1.26  
1.23  
1.20  
1.01  
0.82  
0.81  
0.72  
0.69  
0.25

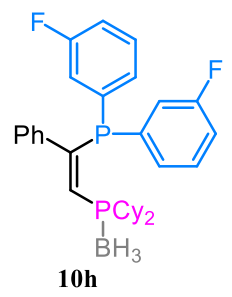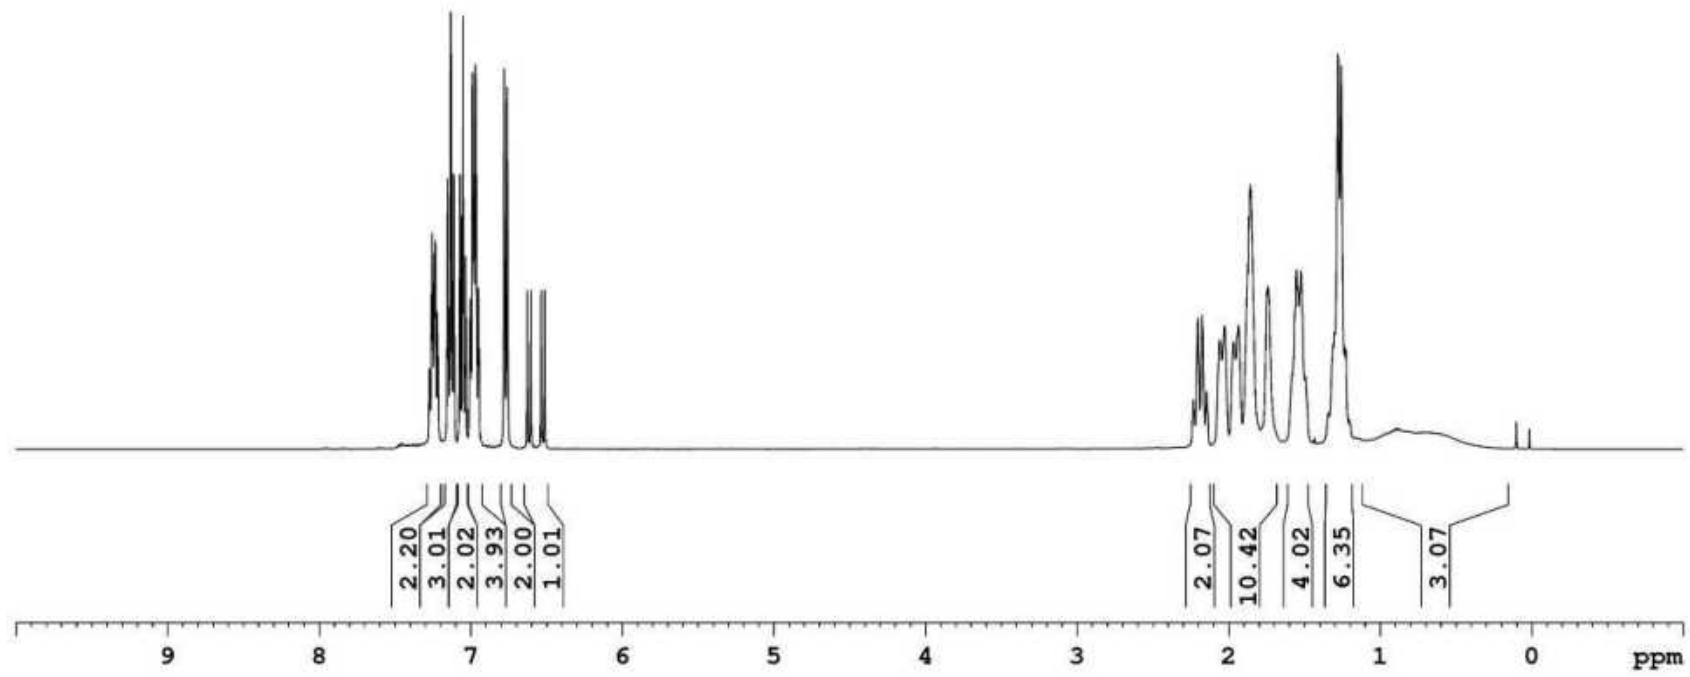

163.78  
163.71  
161.31  
161.24  
159.58  
159.55  
159.25  
159.22  
142.44  
142.40  
142.31  
142.27  
138.08  
138.02  
137.91  
137.86  
137.46  
137.06  
129.96  
129.89  
129.81  
129.29  
129.26  
129.08  
129.05  
127.78  
127.54  
120.00  
119.82  
119.79  
119.61  
115.94  
115.73

34.75  
34.71  
34.42  
34.38  
27.31  
27.25  
27.02  
26.97  
26.91  
26.86  
26.03

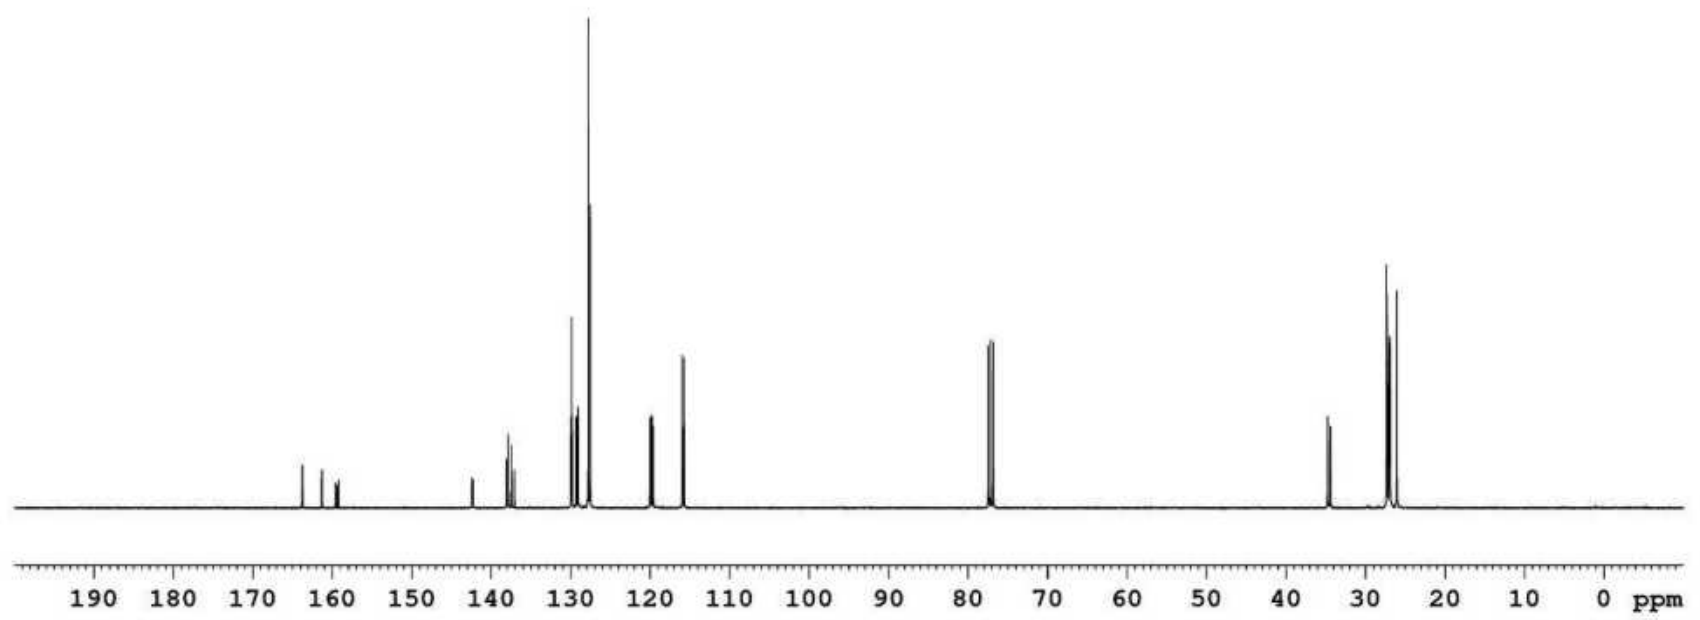

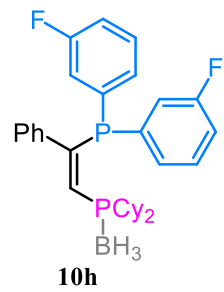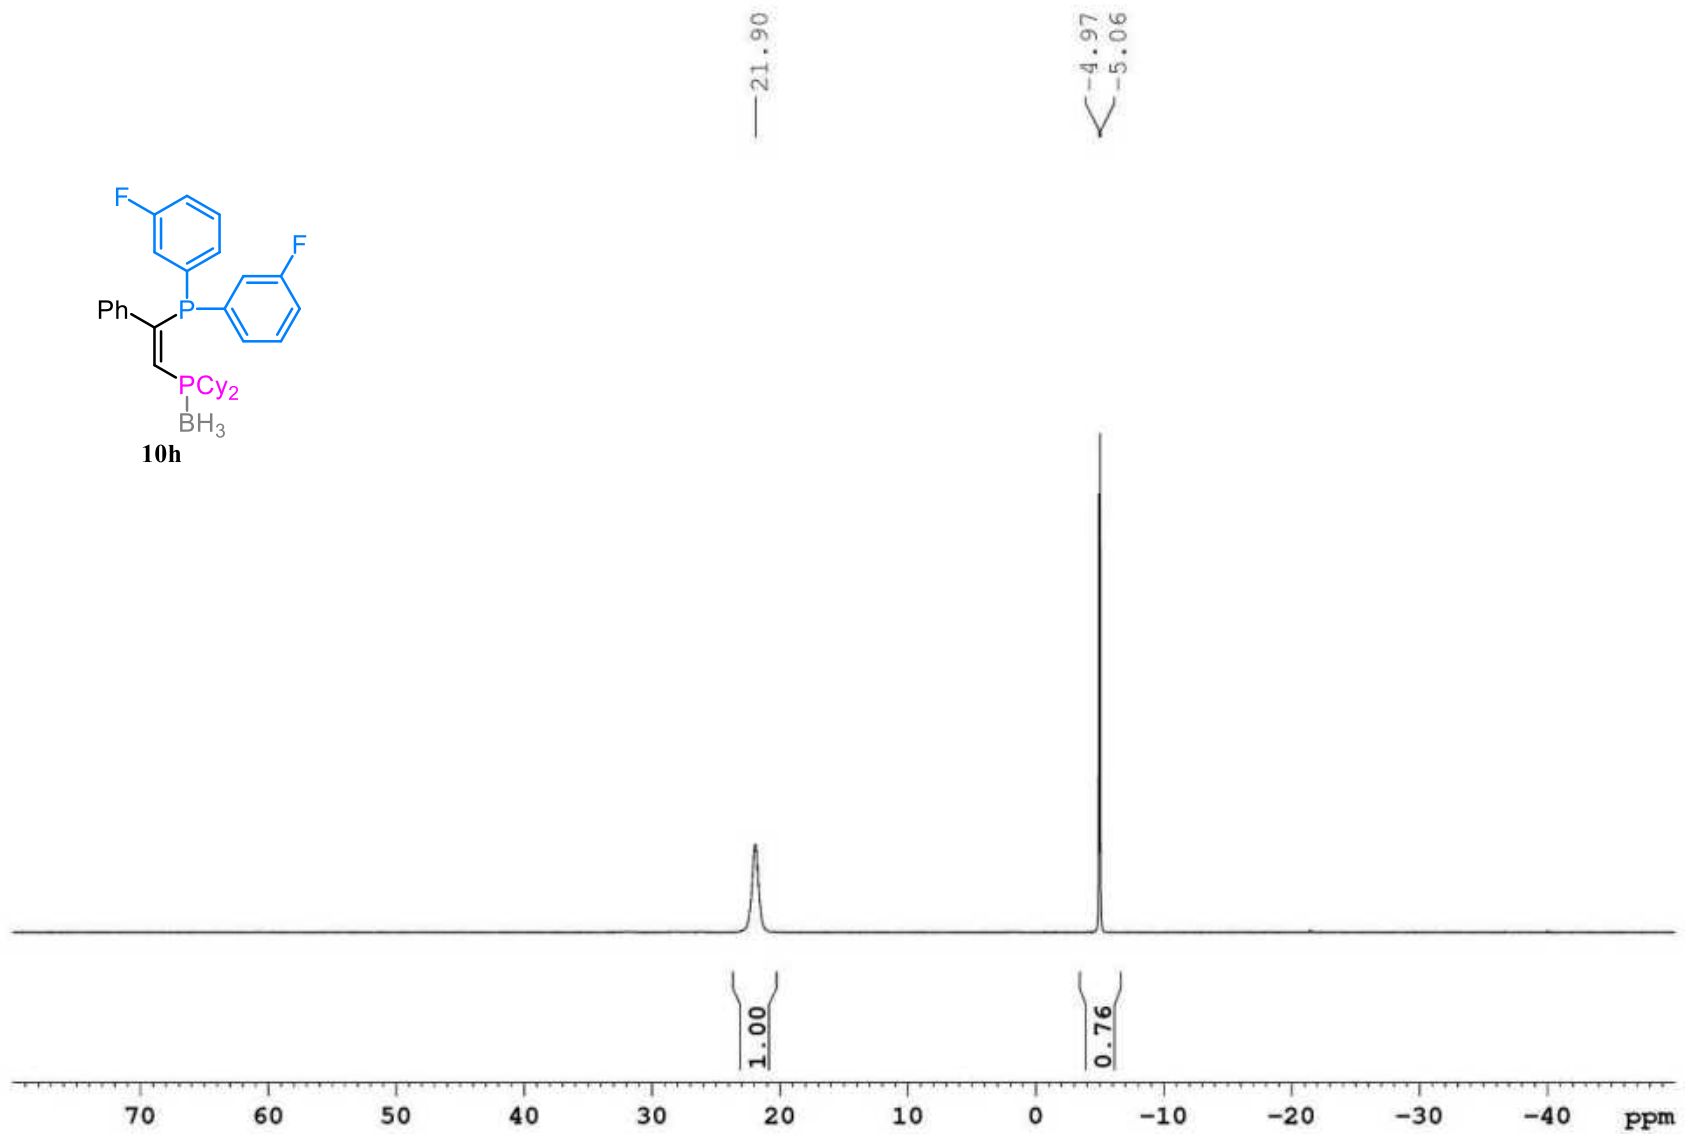



— -39.43

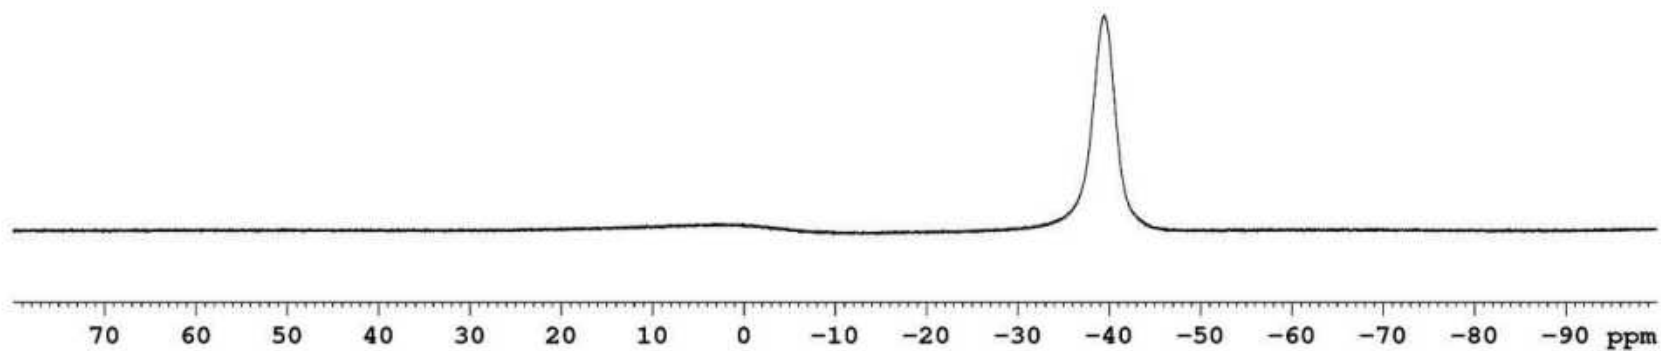



7.25  
7.25  
7.23  
7.23  
7.22  
7.19  
7.17  
7.13  
7.11  
7.07  
7.05  
7.03  
6.73  
6.72  
6.71  
6.60  
6.58  
6.51  
6.49

2.20  
2.19  
2.17  
2.14  
2.11  
2.11  
2.04  
2.00  
1.95  
1.91  
1.85  
1.73  
1.56  
1.54  
1.53  
1.47  
1.33  
1.27  
1.25  
1.20  
1.09  
0.98  
0.96  
0.64  
0.20

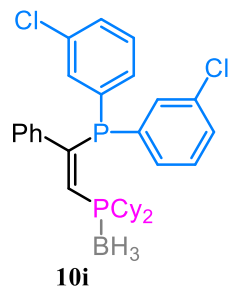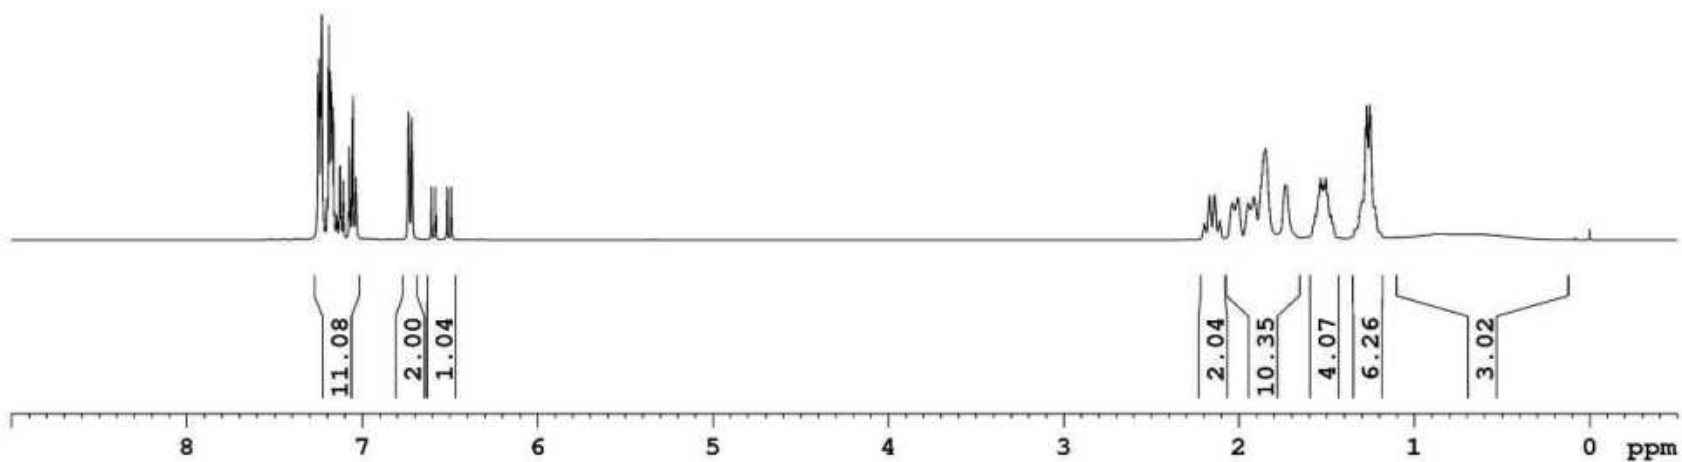

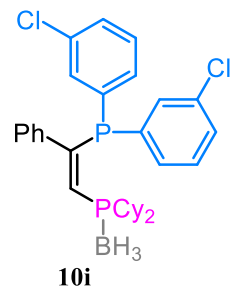

159.56  
 159.52  
 159.22  
 159.19  
 142.37  
 142.33  
 142.25  
 142.21  
 137.79  
 137.67  
 137.50  
 137.39  
 136.98  
 134.50  
 134.43  
 133.04  
 132.85  
 131.62  
 131.41  
 129.60  
 129.53  
 128.94  
 127.79  
 127.49

34.70  
 34.66  
 34.37  
 34.33  
 27.29  
 27.24  
 27.03  
 26.97  
 26.93  
 26.86  
 26.03

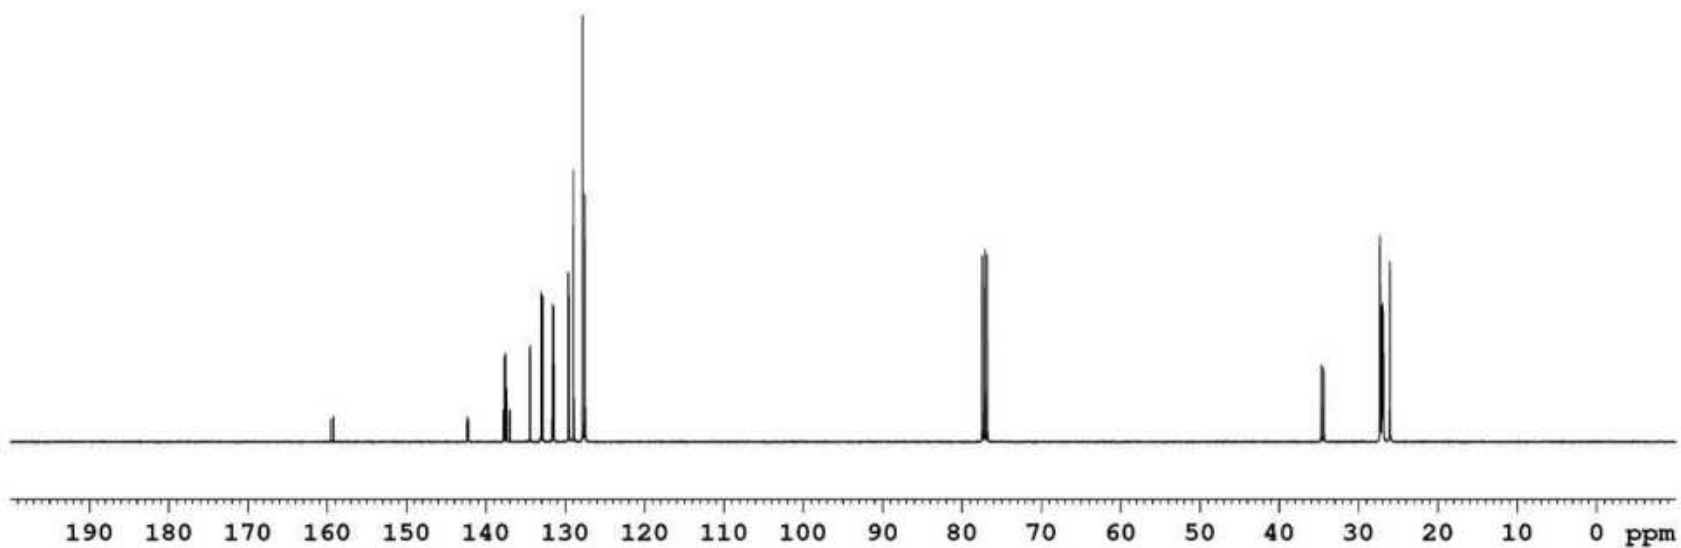

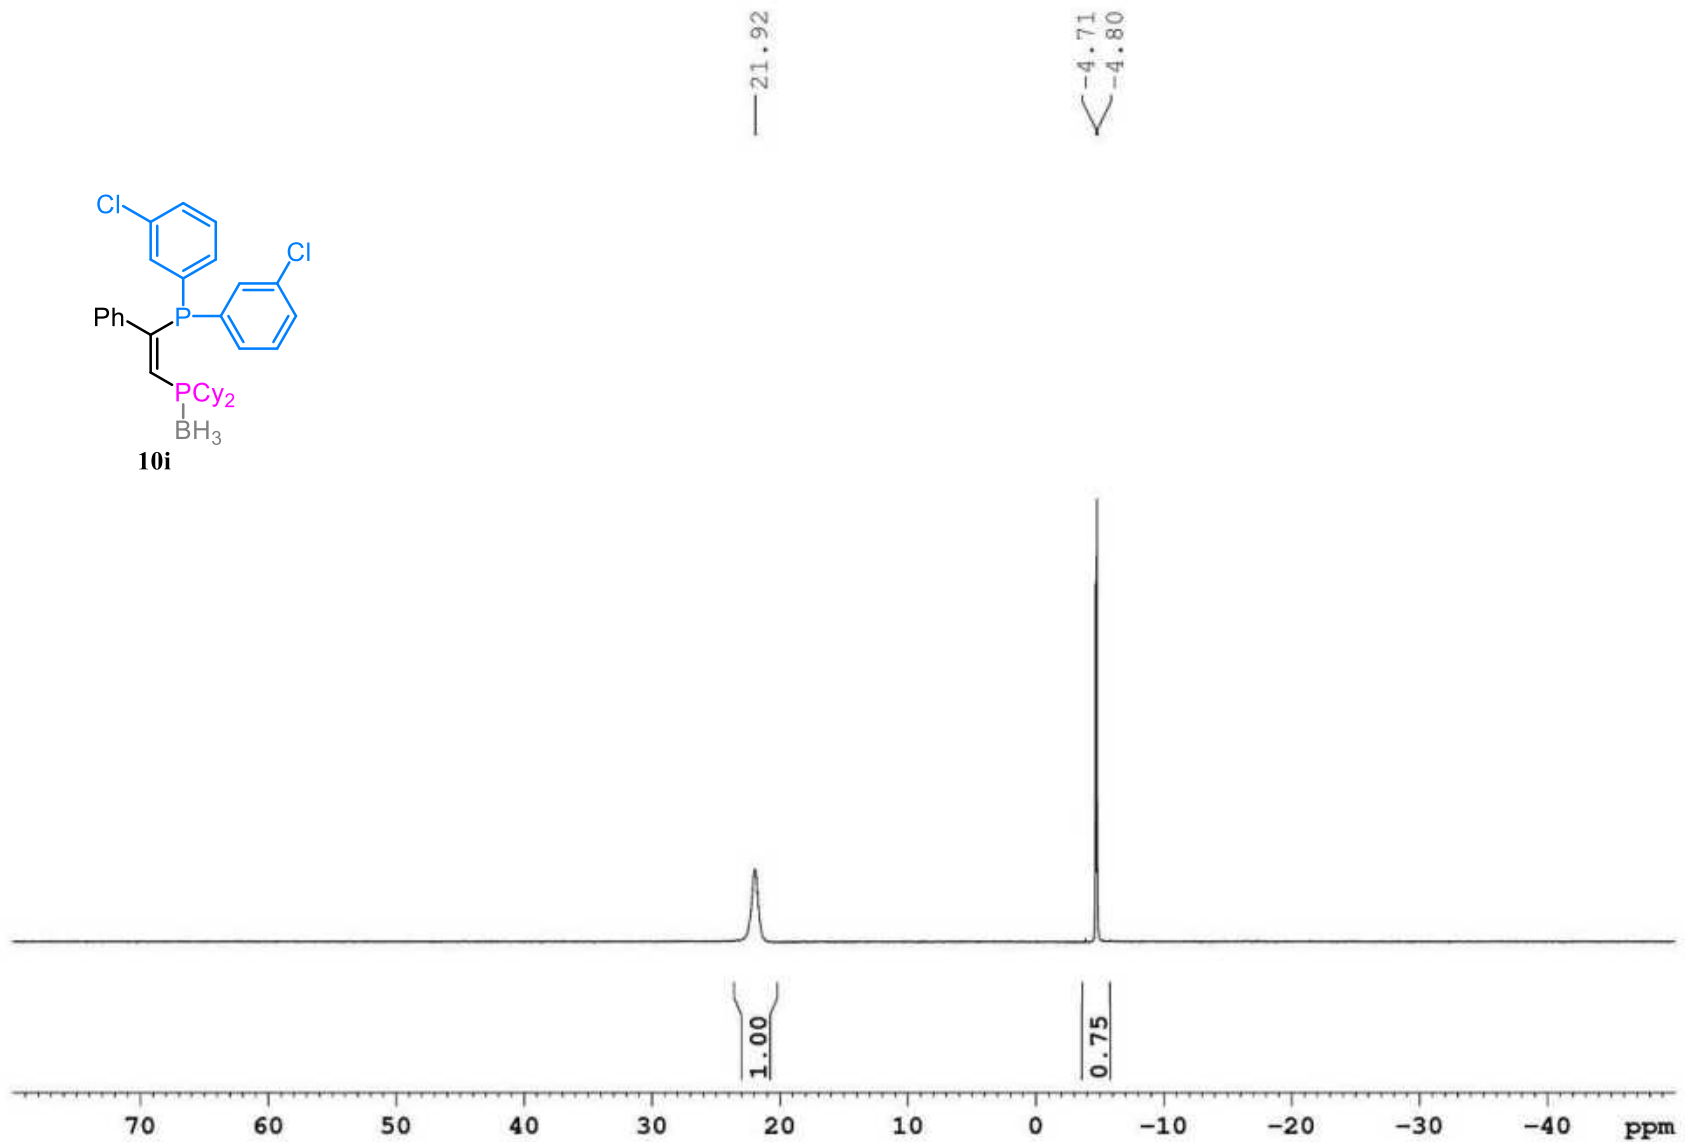



— -39.70

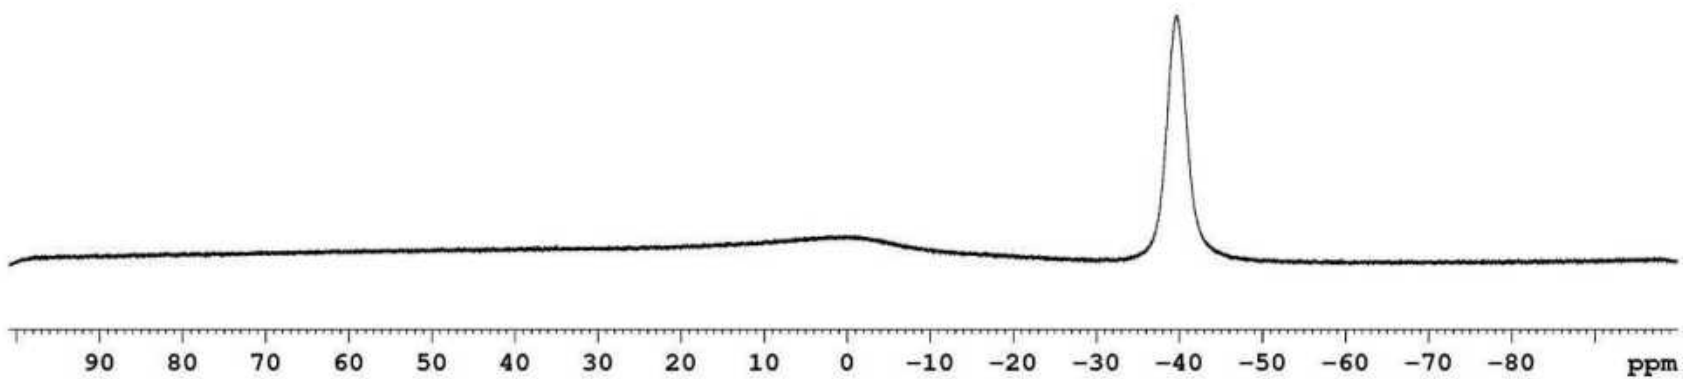

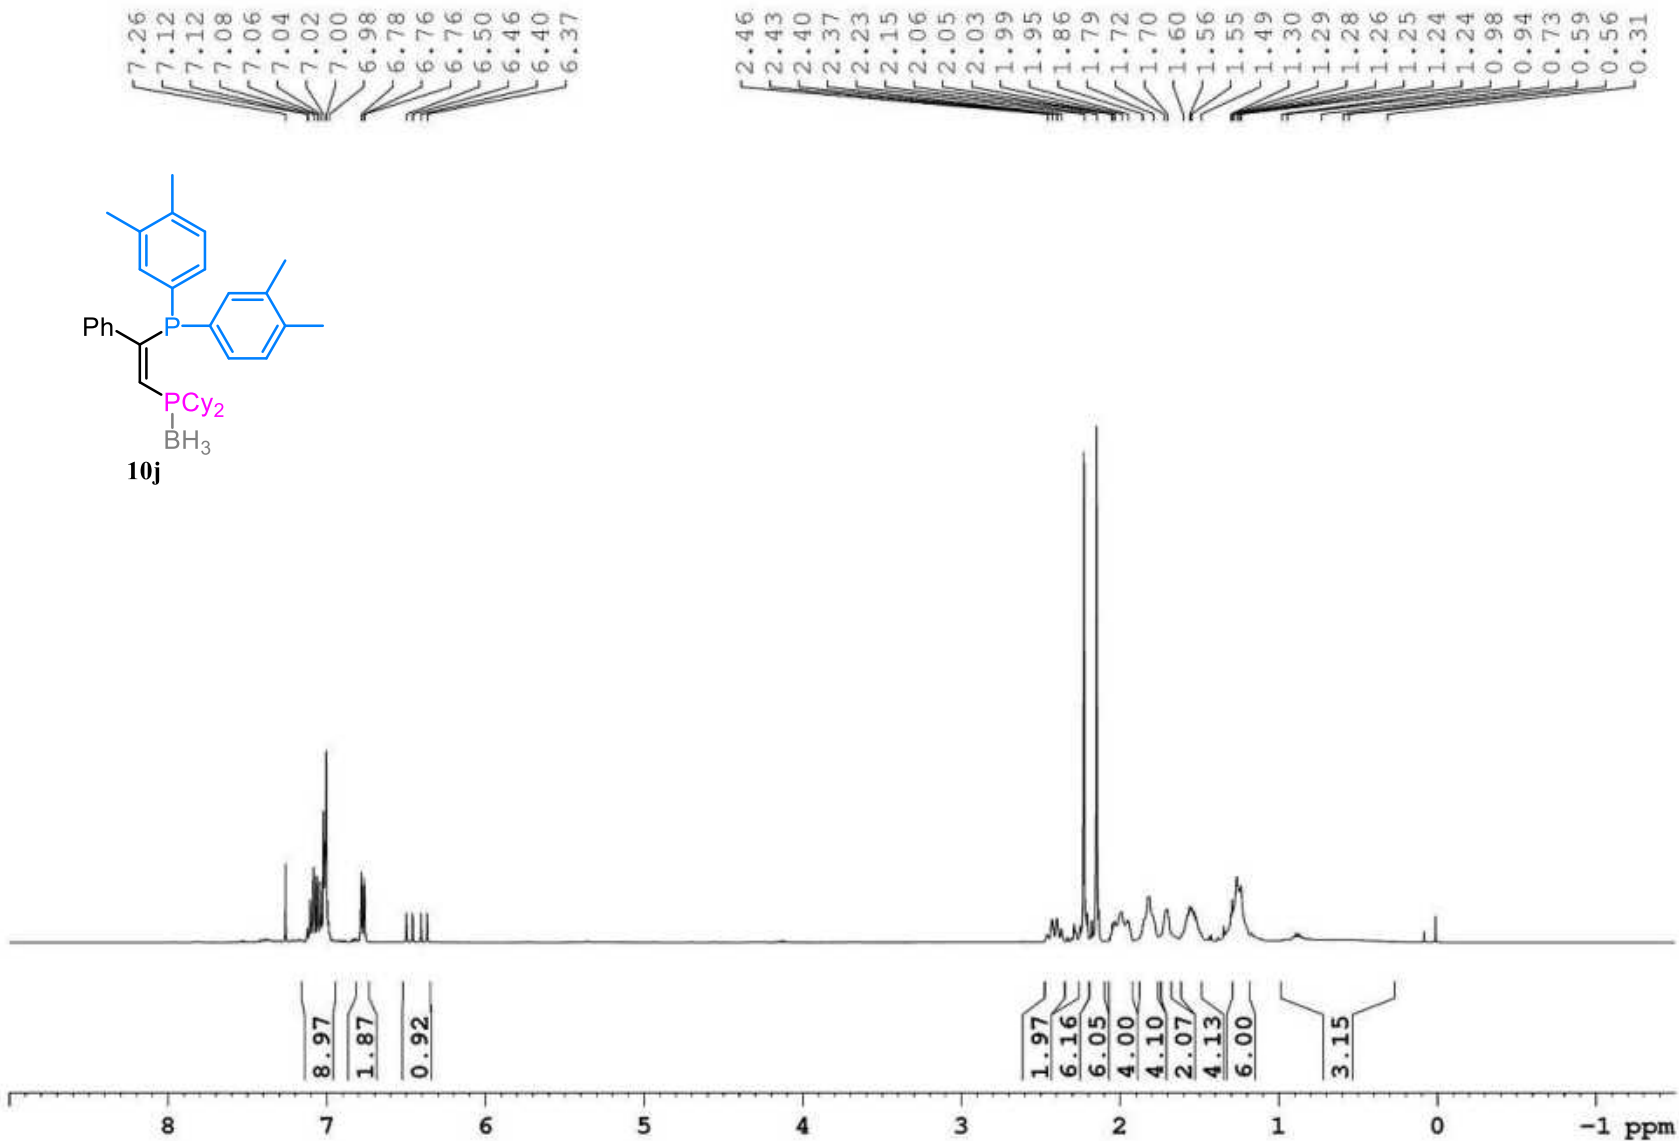

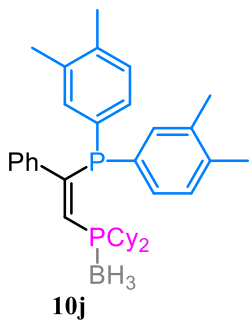

160.94  
 160.61  
 143.26  
 143.22  
 143.13  
 143.09  
 137.19  
 136.78  
 136.37  
 136.31  
 135.96  
 134.83  
 134.63  
 132.21  
 132.10  
 131.14  
 130.96  
 129.55  
 129.48  
 127.90  
 127.37  
 127.26

34.96  
 34.89  
 34.64  
 34.56  
 27.68  
 27.52  
 26.99  
 26.88  
 26.03  
 19.68  
 19.63

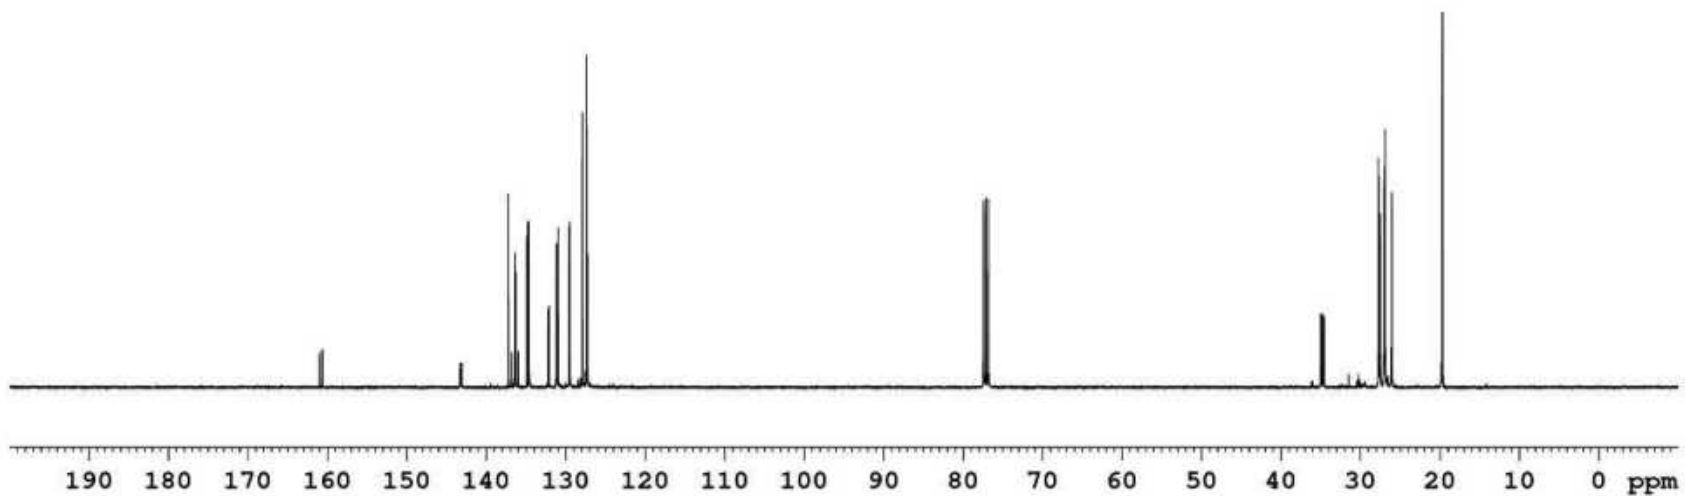

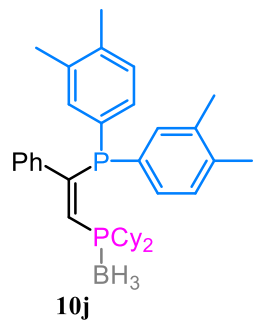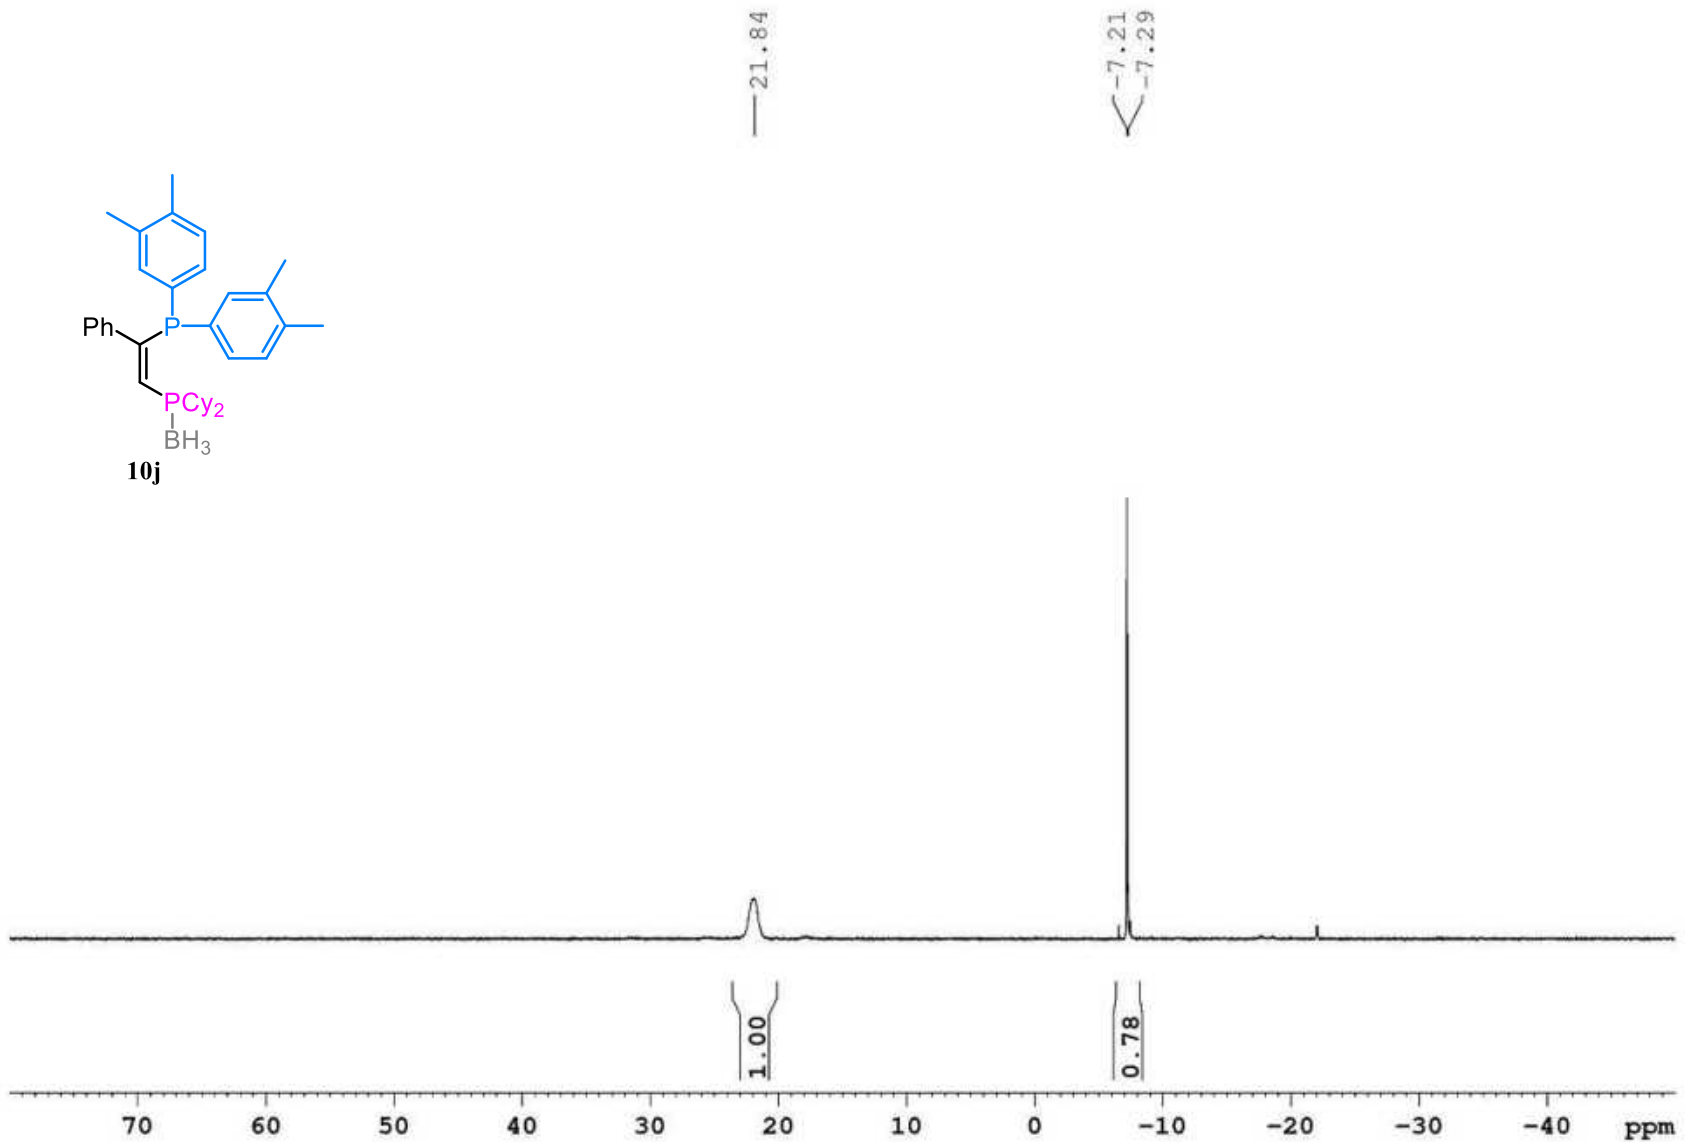



— -40.41

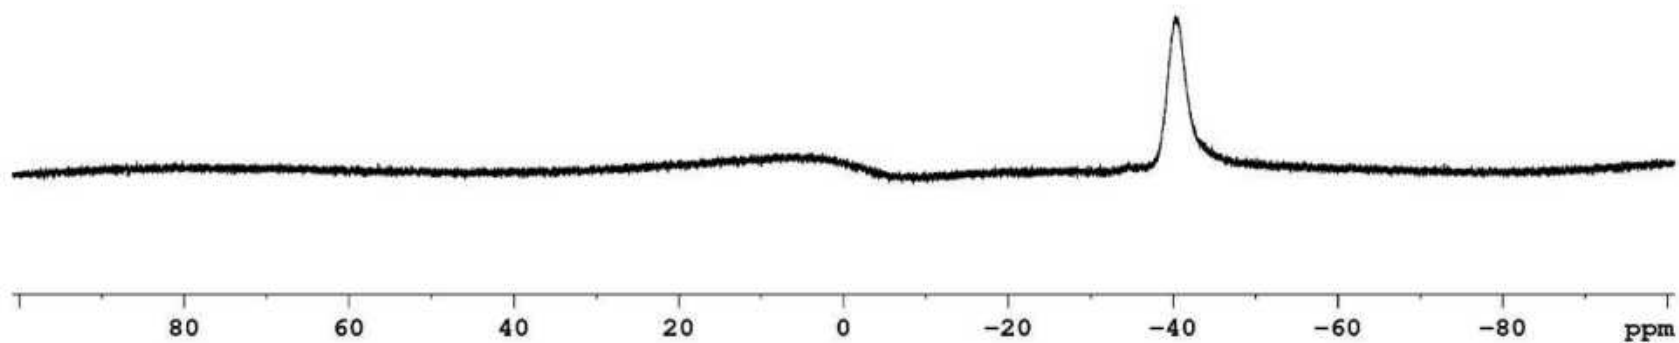



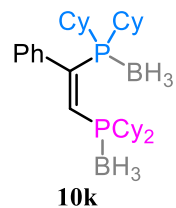

7.34  
 7.32  
 7.26  
 7.13  
 7.12  
 6.51  
 6.45

3.12  
 3.09  
 3.06  
 3.03  
 2.01  
 1.98  
 1.94  
 1.91  
 1.88  
 1.86  
 1.76  
 1.70  
 1.61  
 1.58  
 1.55  
 1.51  
 1.44  
 1.38  
 1.34  
 1.27  
 1.23  
 1.10  
 0.97  
 0.96  
 0.94  
 0.88  
 0.08  
 -0.20

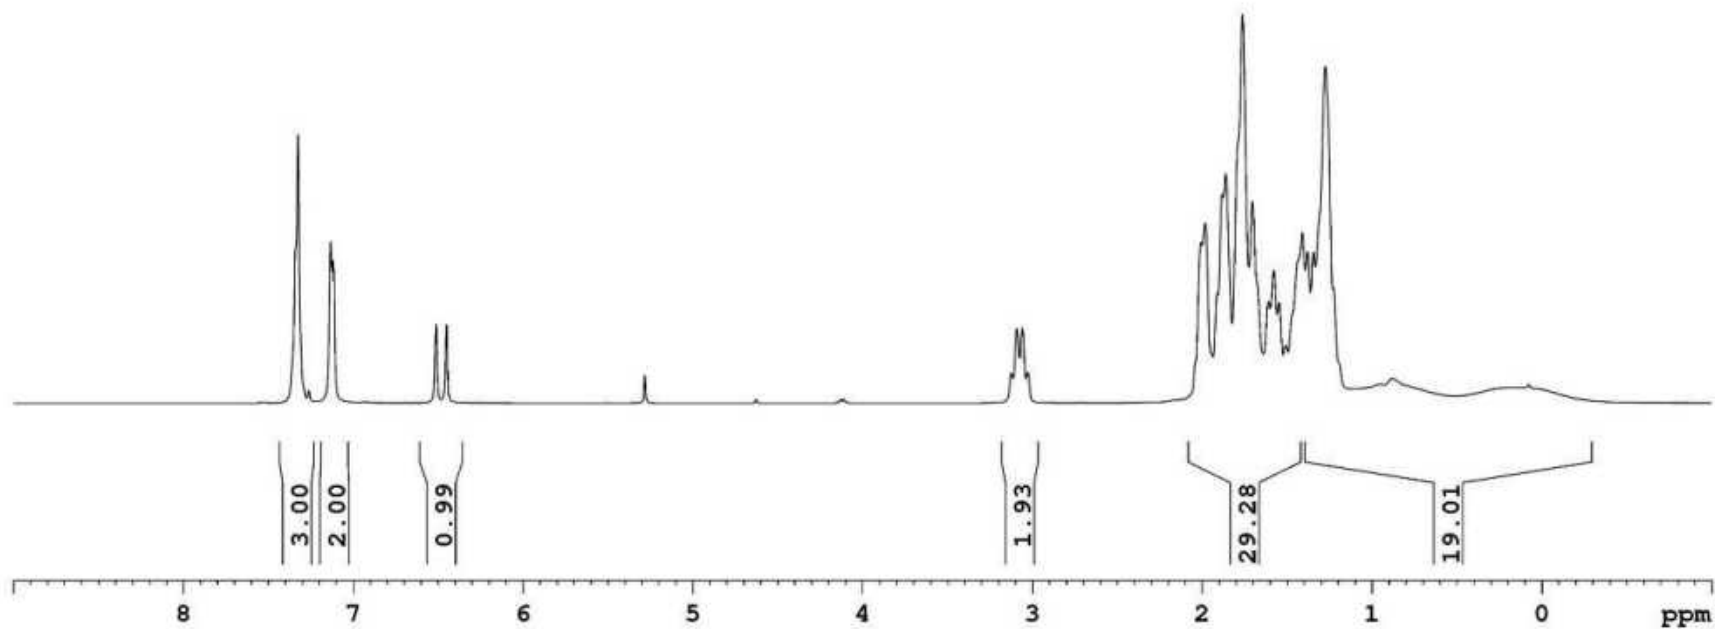

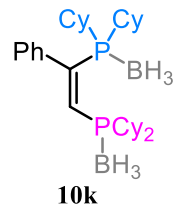

158.06  
 158.04  
 157.76  
 157.74  
 145.15  
 145.02  
 144.89  
 135.71  
 135.38  
 127.85  
 127.72

35.38  
 35.25  
 35.10  
 34.90  
 28.23  
 28.16  
 27.23  
 27.00  
 26.94  
 26.89  
 26.83  
 26.45  
 26.34  
 26.23  
 25.97  
 25.74

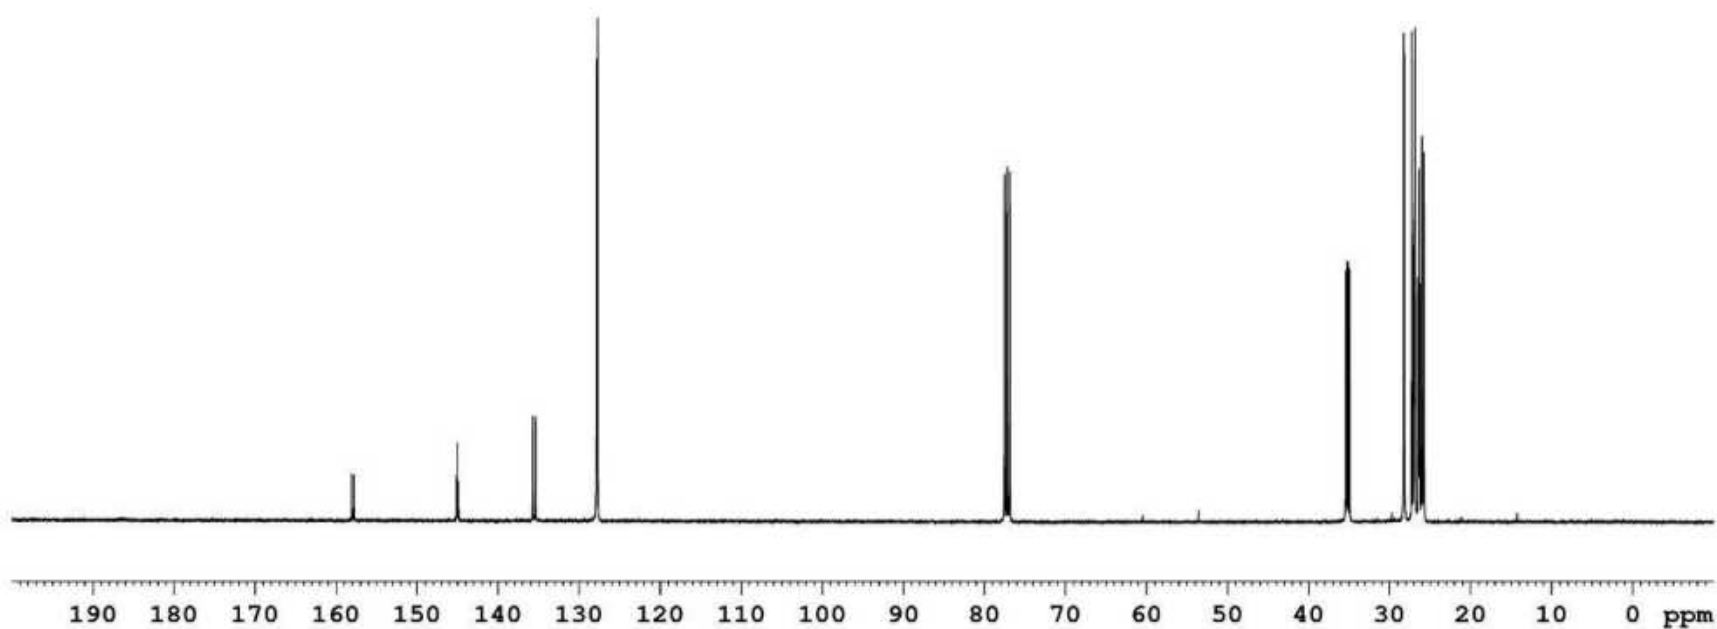

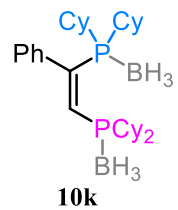

—33.73

—19.07

1.00

1.05

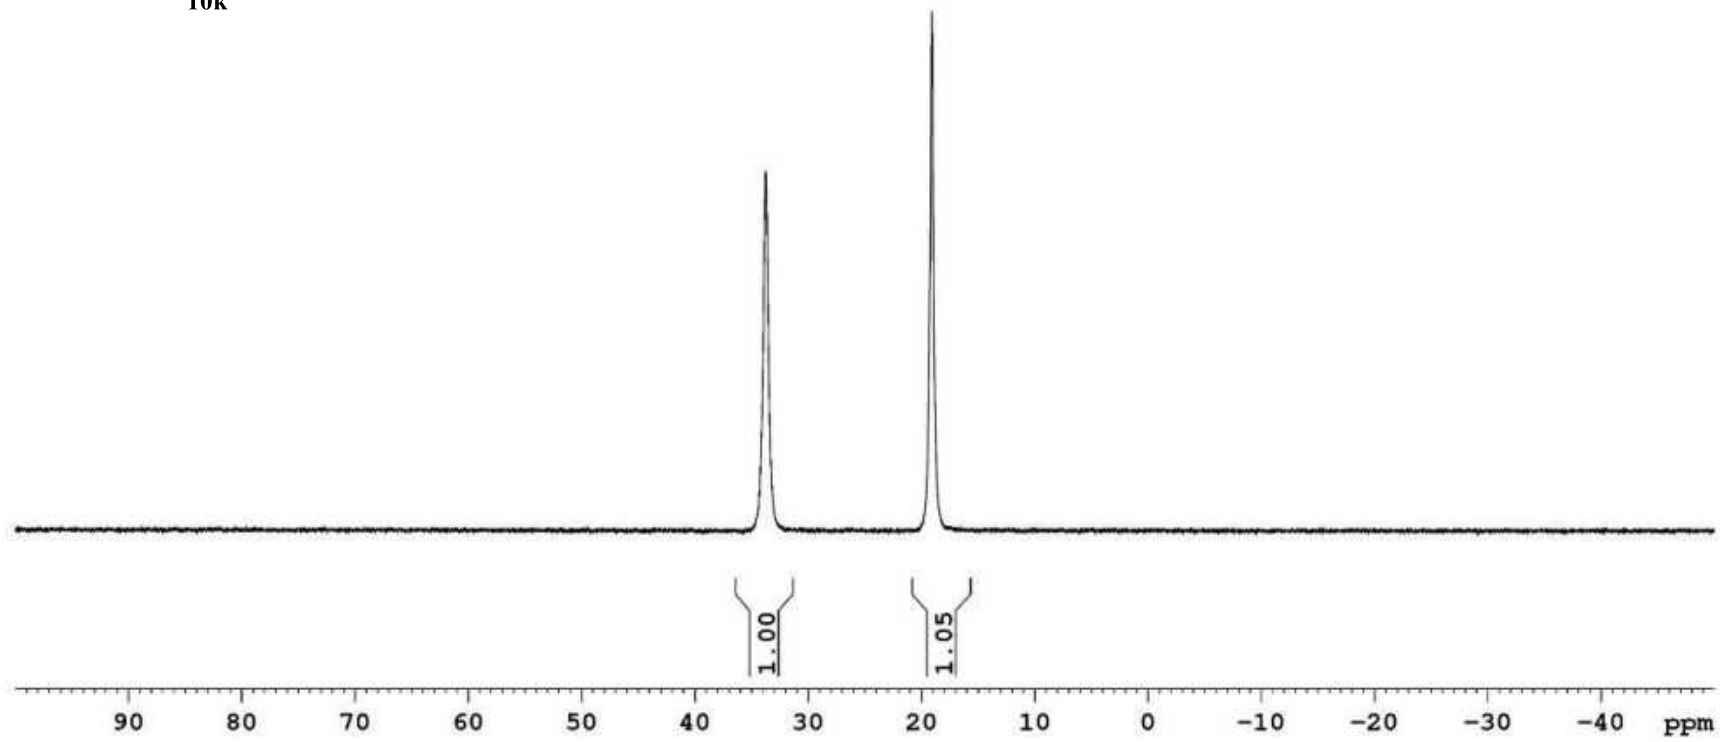



— -39.10  
— -42.87

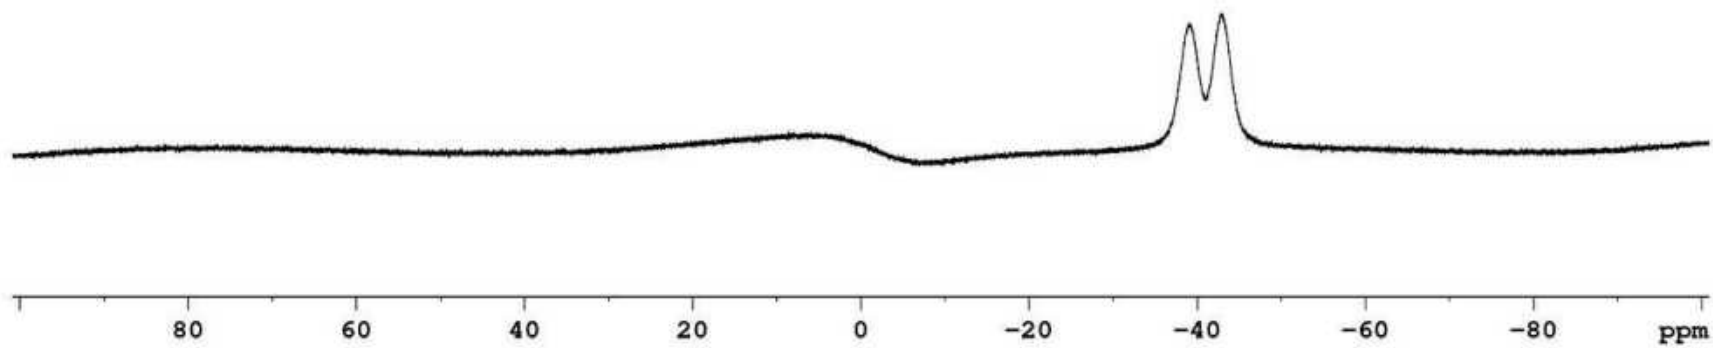

S445

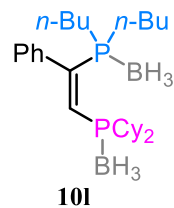

7.39  
7.37  
7.35  
7.34  
7.26  
7.16  
7.15  
7.14  
6.41  
6.34

2.14  
2.13  
2.09  
2.04  
1.97  
1.89  
1.83  
1.79  
1.74  
1.72  
1.47  
1.46  
1.42  
1.41  
1.38  
1.34  
1.33  
1.21  
0.93  
0.88  
0.86  
0.85  
0.71  
0.69  
0.17

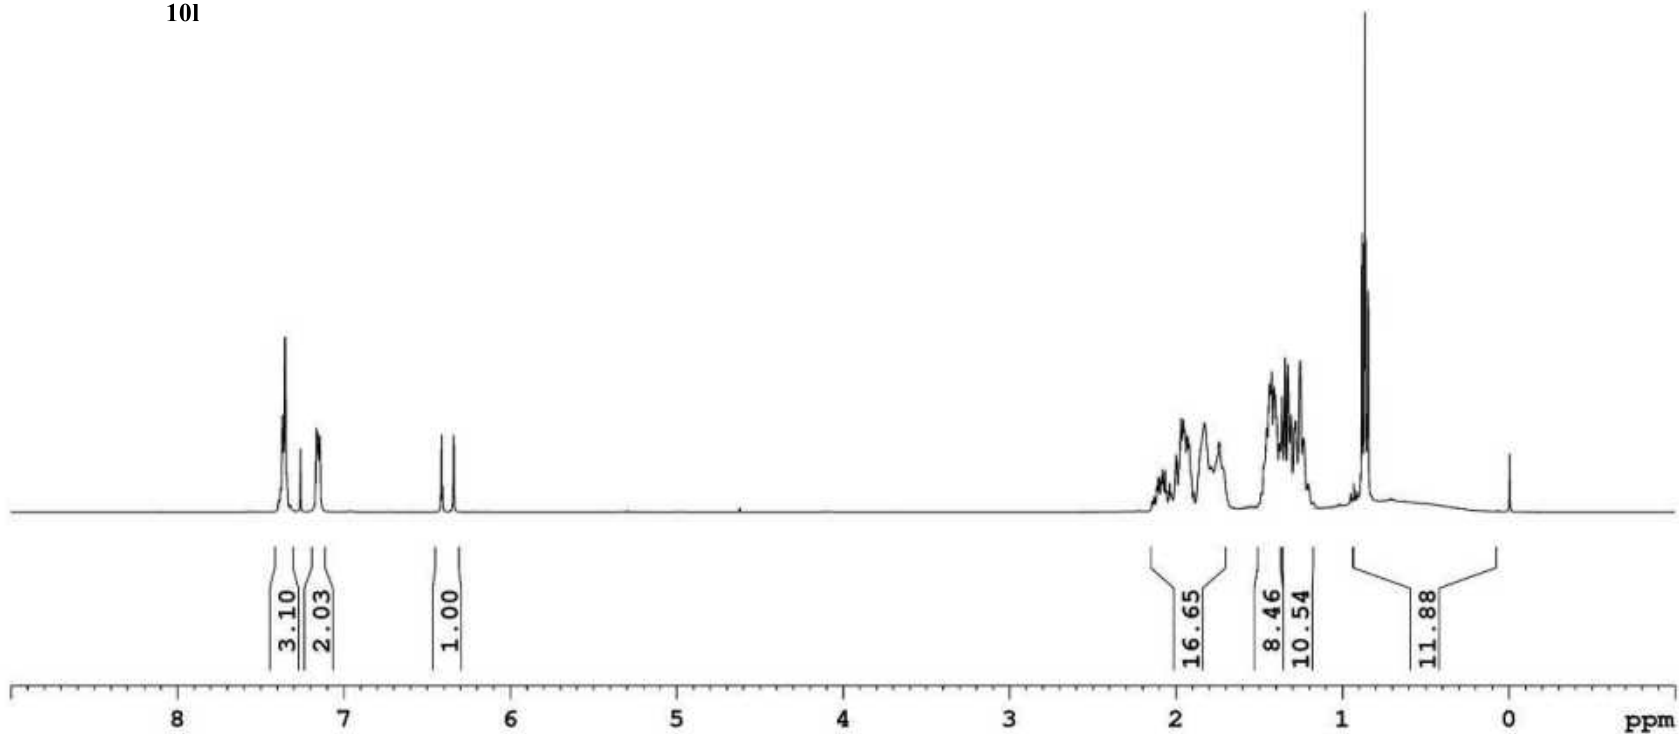

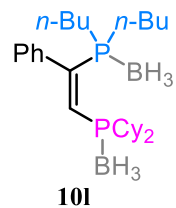

156.17  
 156.15  
 155.84  
 155.82  
 143.90  
 143.81  
 143.78  
 143.68  
 136.85  
 136.80  
 136.51  
 136.47  
 128.22  
 128.08  
 127.34  
 127.32

34.87  
 34.53  
 27.06  
 26.96  
 26.88  
 26.85  
 26.72  
 25.96  
 25.30  
 25.28  
 24.97  
 24.26  
 24.11  
 13.71

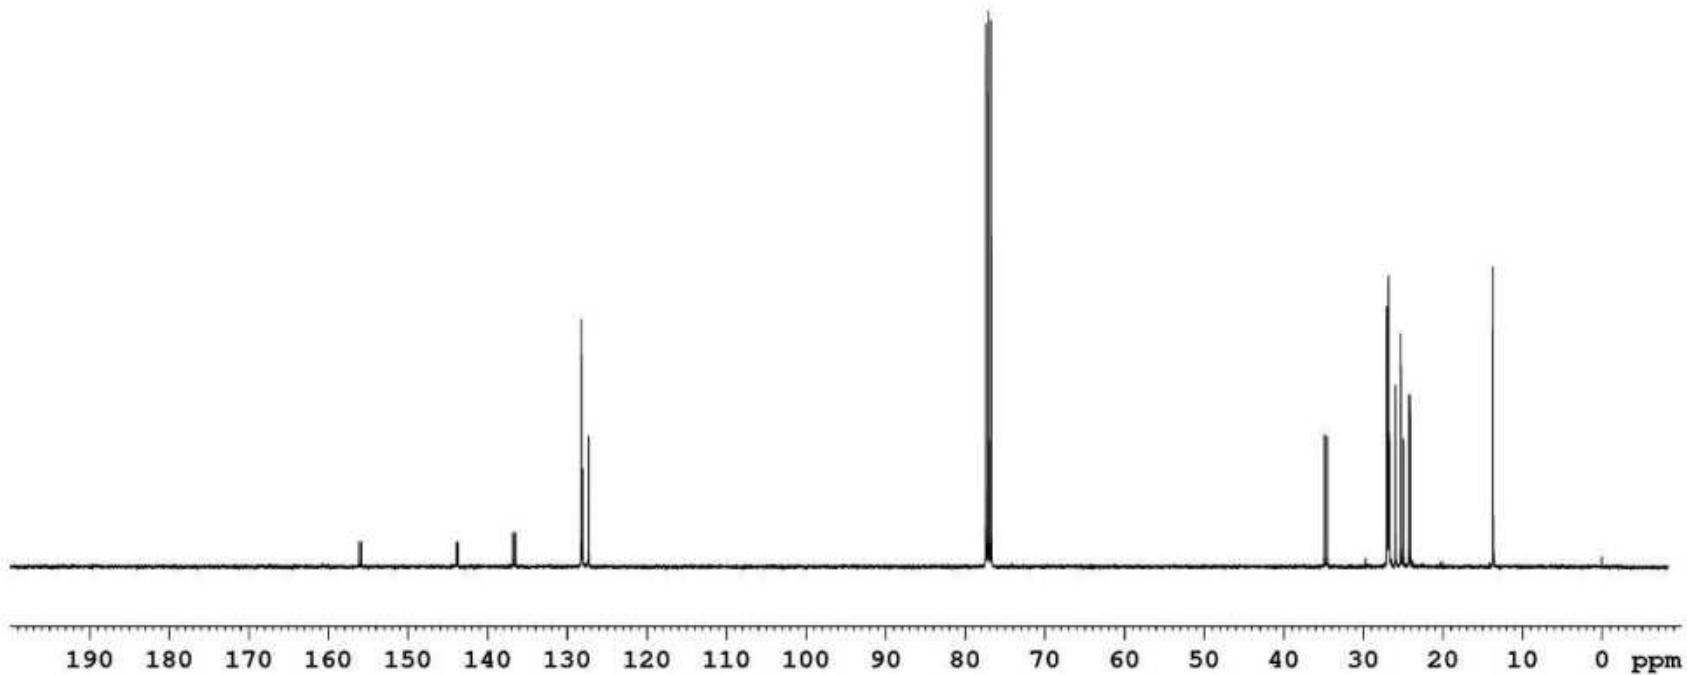

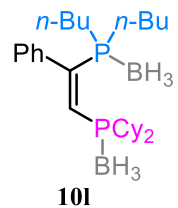

19.71  
18.98

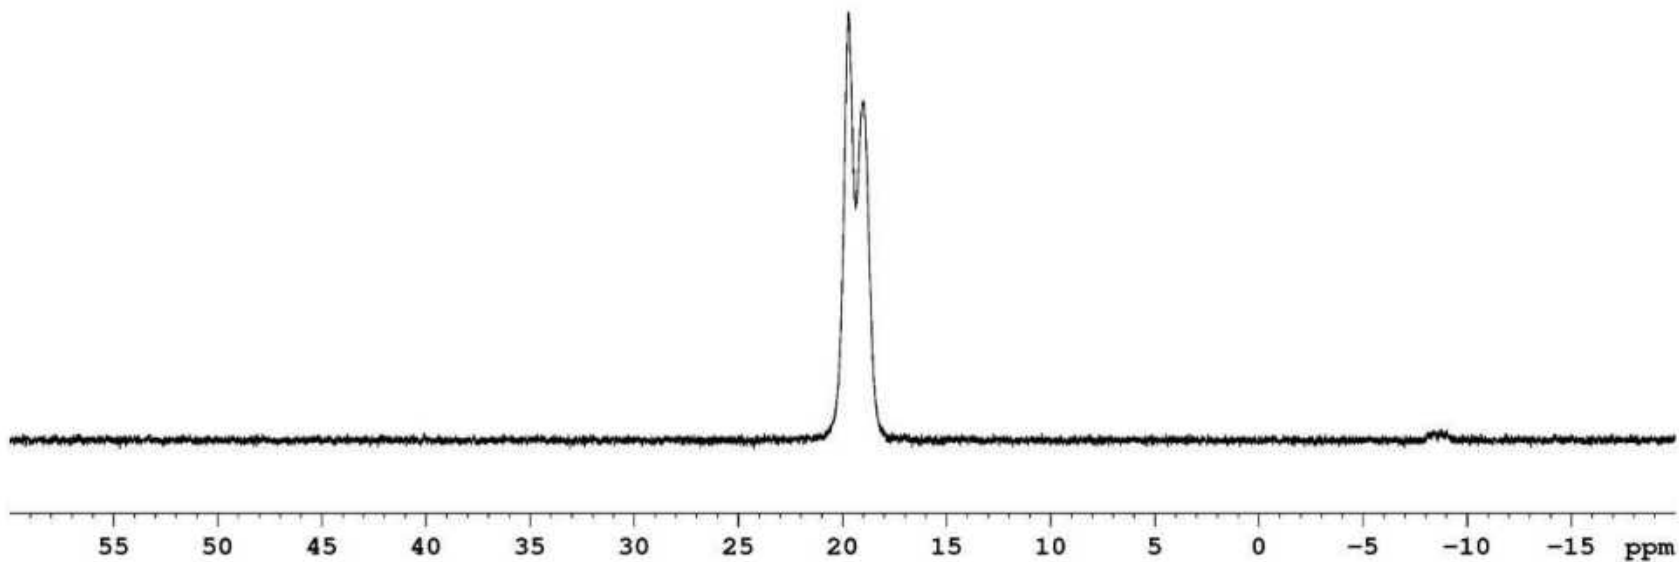

S448

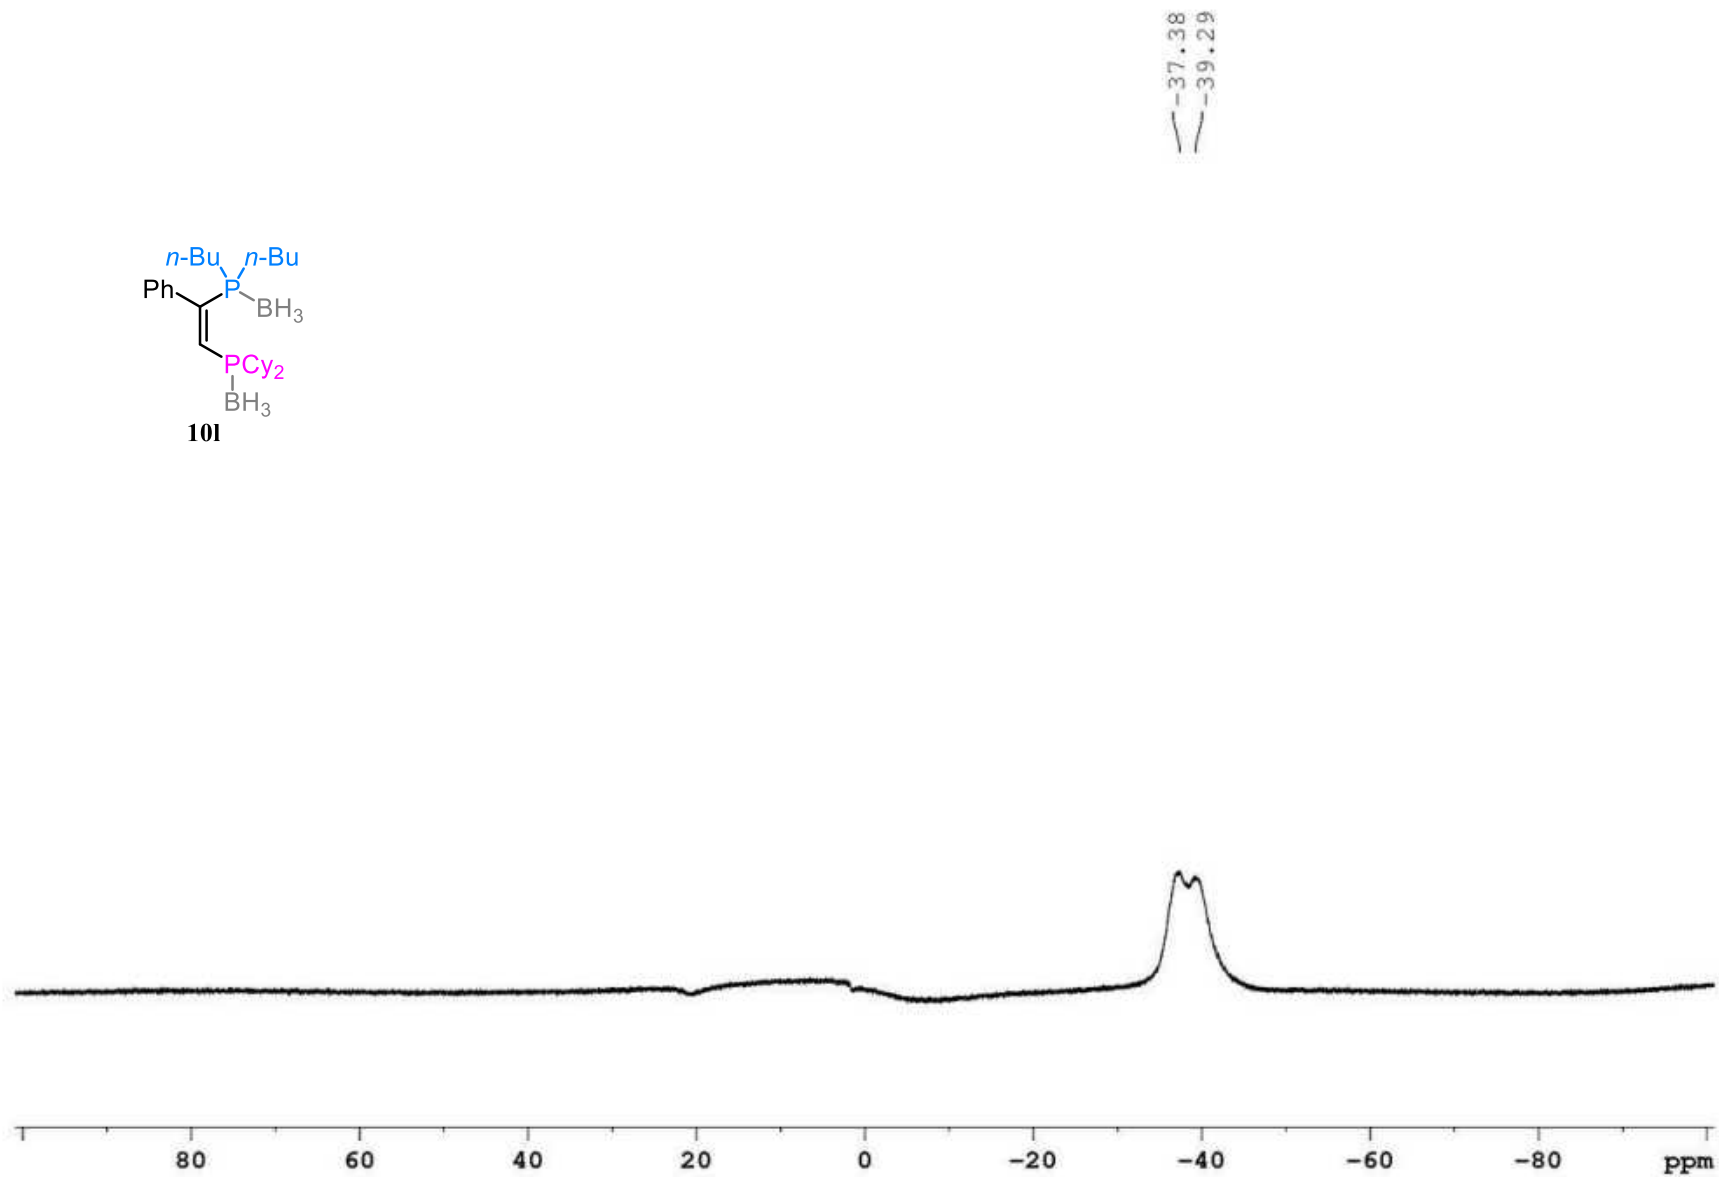



7.32  
7.31  
7.30  
7.28  
7.27  
7.26  
7.25  
7.24  
7.22  
6.98  
6.96  
6.70  
6.68  
6.54  
6.51  
6.45  
6.42

2.35  
2.32  
2.29  
2.26  
2.02  
1.99  
1.95  
1.91  
1.81  
1.78  
1.69  
1.57  
1.54  
1.50  
1.47  
1.26  
1.24  
1.22  
1.22  
1.17  
1.15  
0.95  
0.94  
0.91  
0.86  
0.82  
0.66  
0.59  
0.40

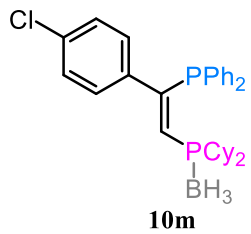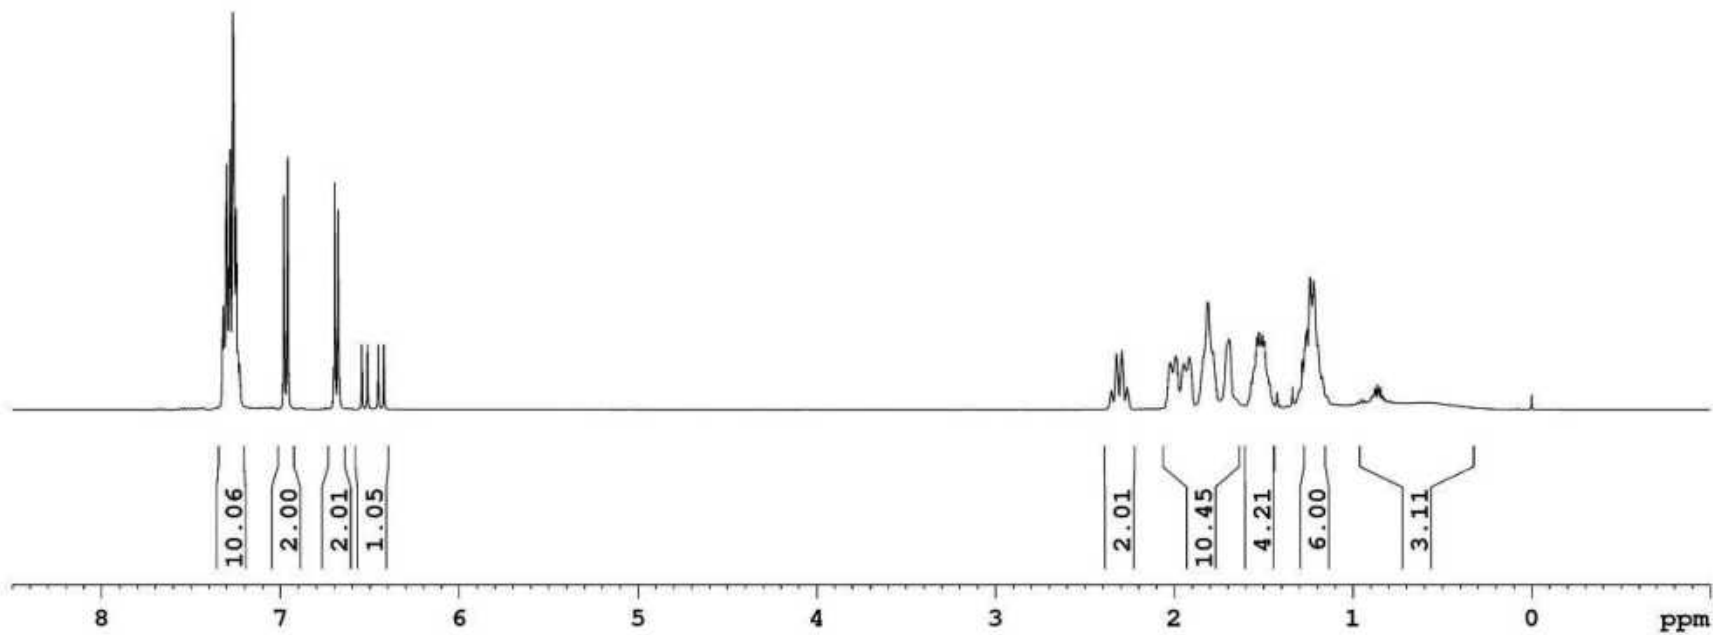



159.00  
 158.67  
 141.23  
 141.18  
 141.10  
 141.06  
 138.03  
 137.64  
 137.62  
 137.22  
 135.10  
 134.97  
 133.47  
 133.43  
 133.24  
 129.10  
 128.79  
 128.39  
 128.33  
 127.69

34.88  
 34.81  
 34.56  
 34.49  
 27.53  
 27.45  
 26.96  
 26.85  
 25.98

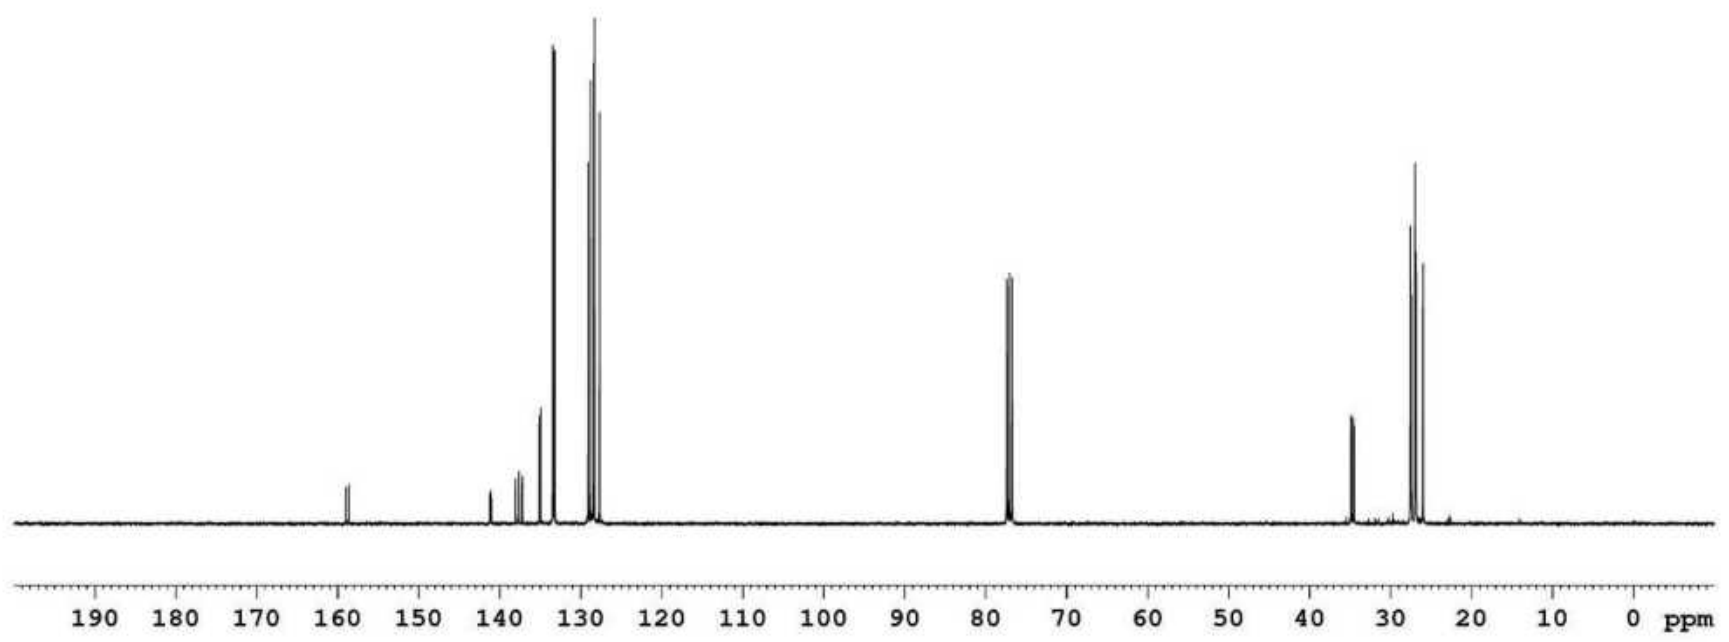

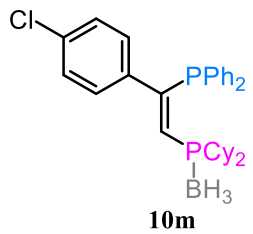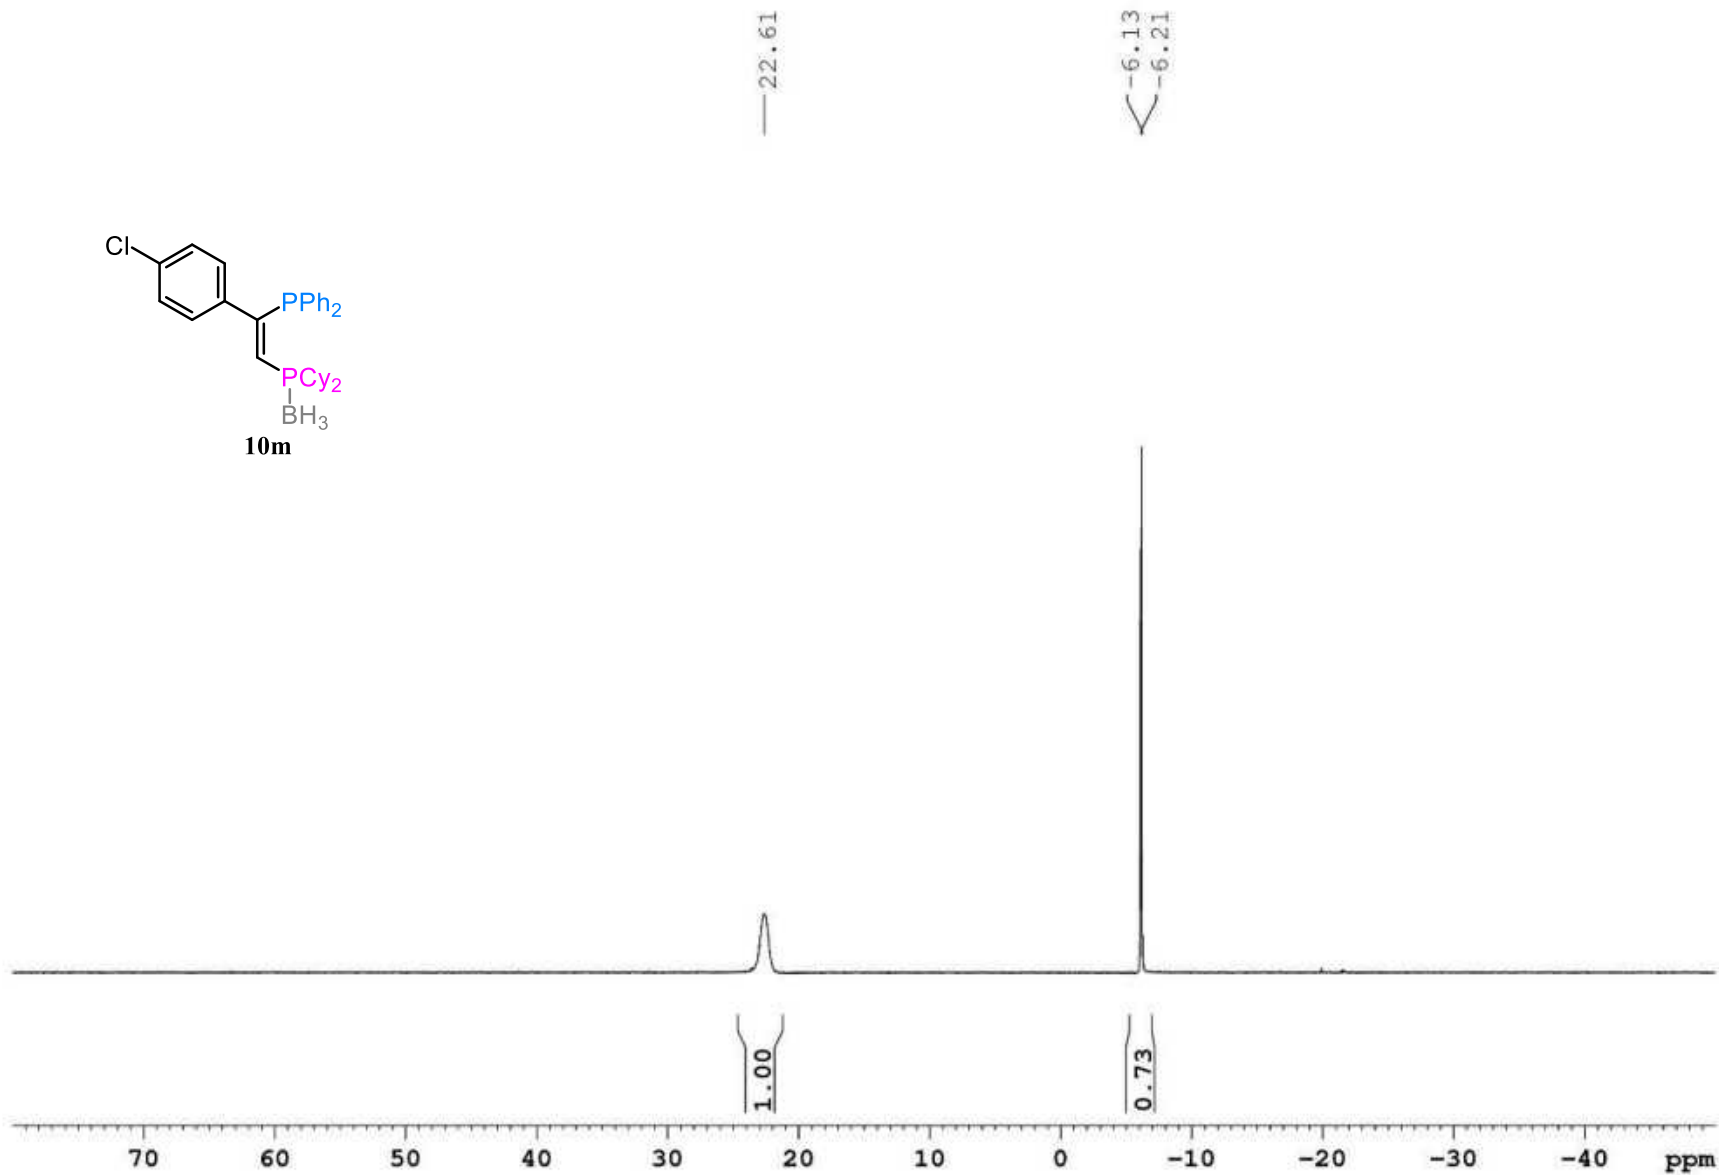

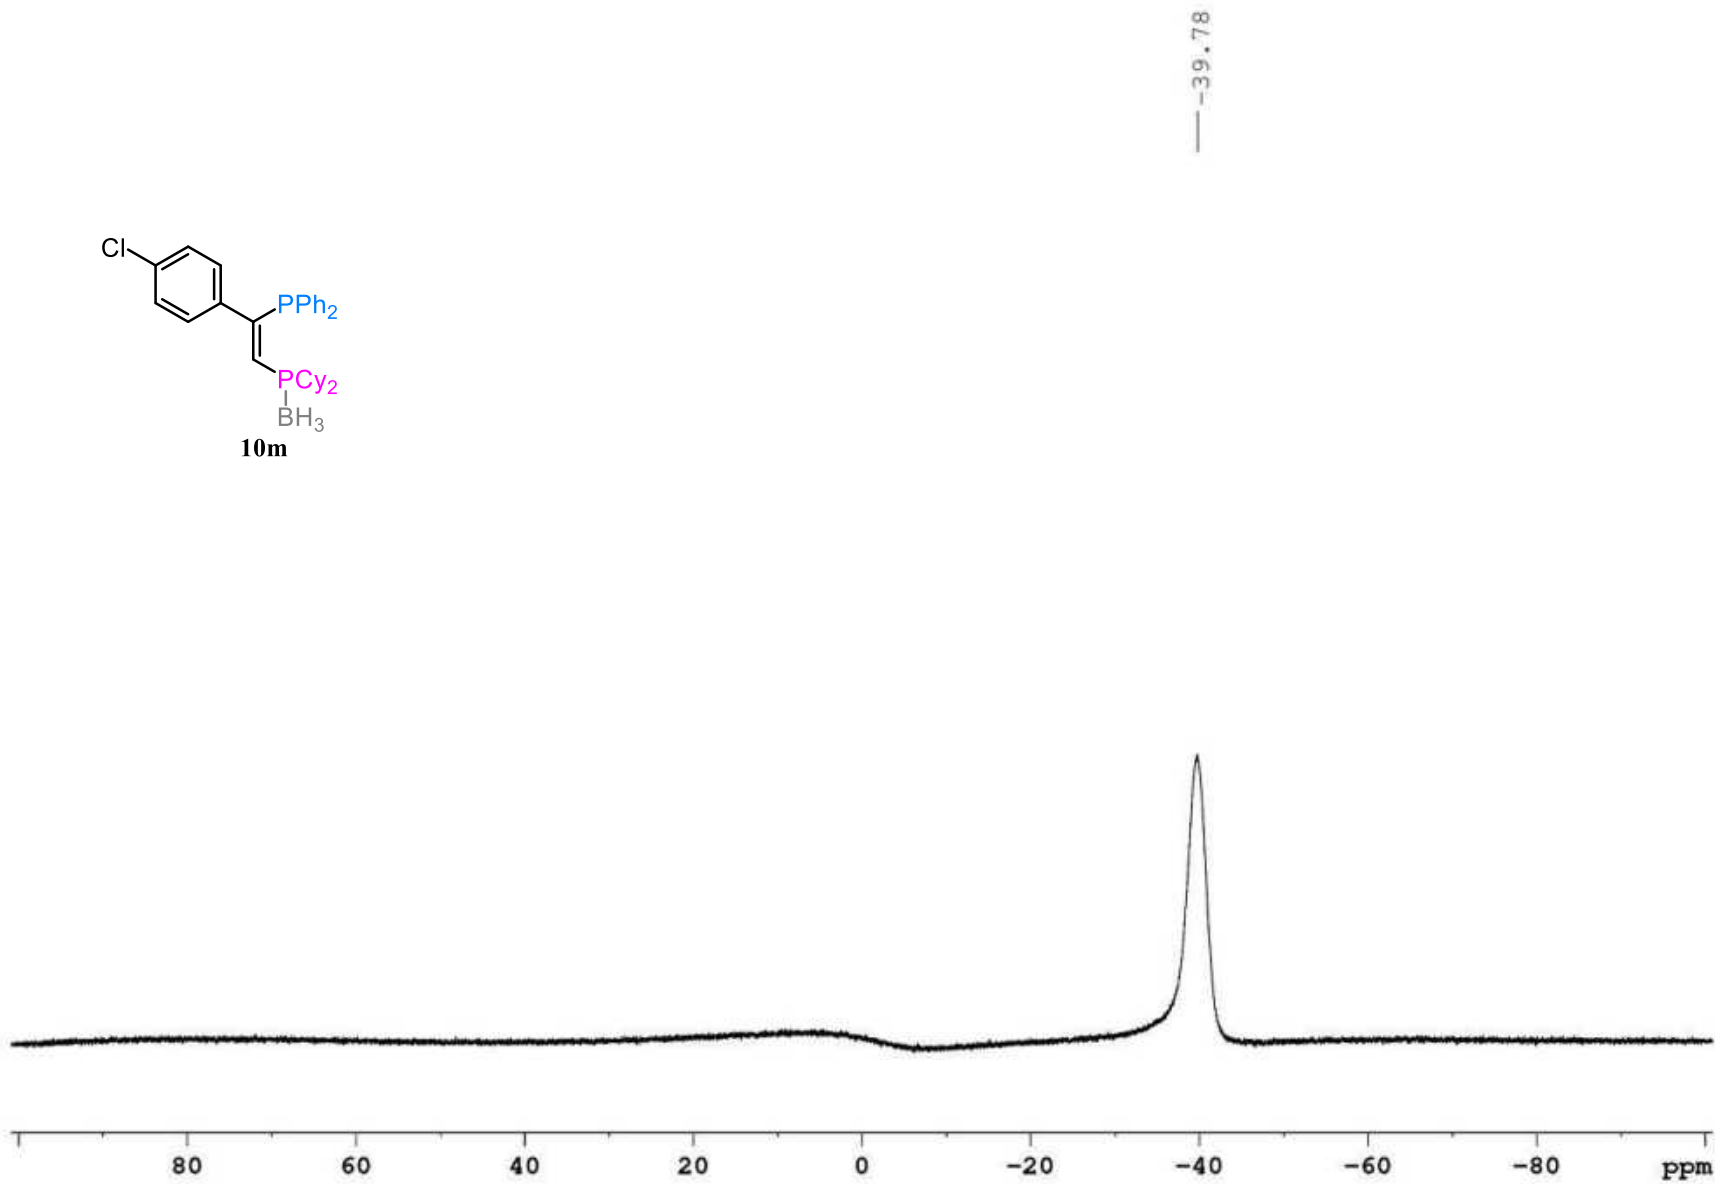

S453

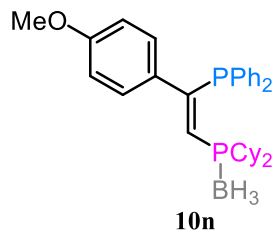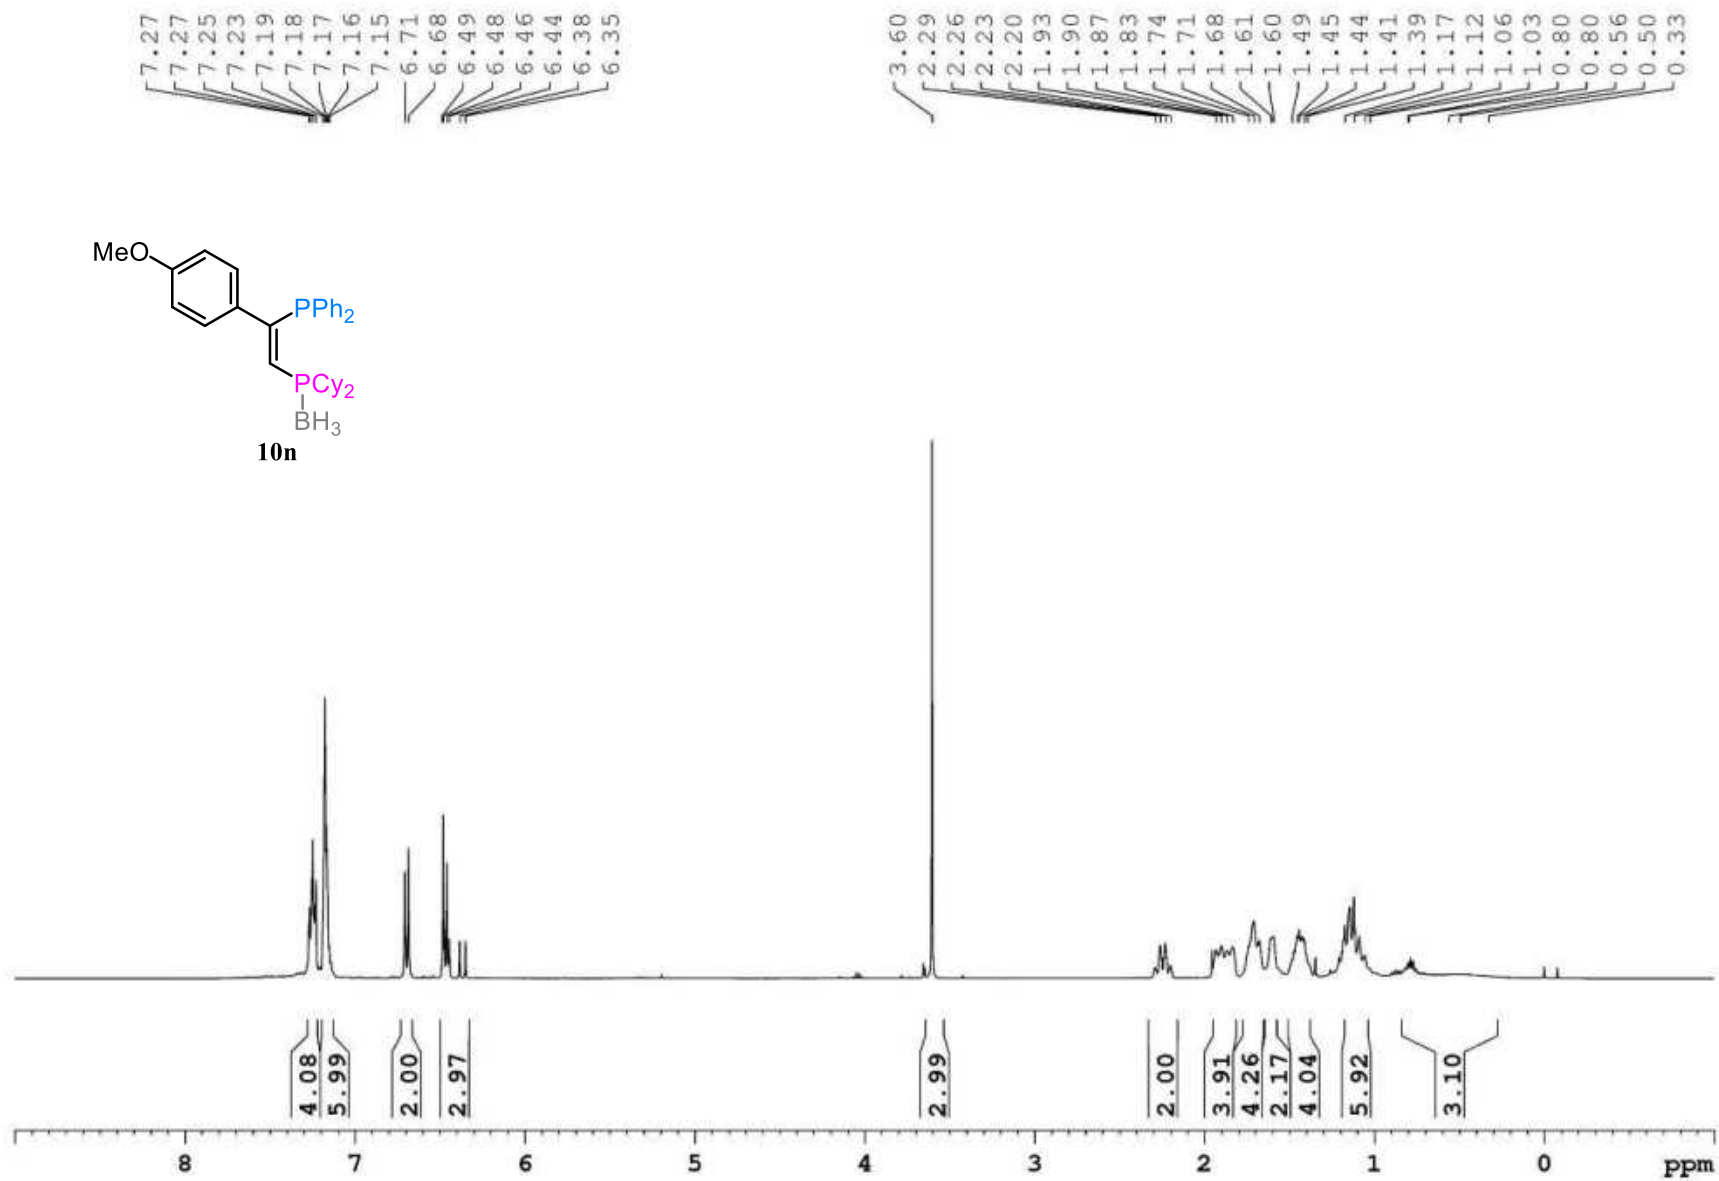



159.31  
 159.18  
 158.99  
 136.38  
 135.98  
 135.94  
 135.61  
 135.55  
 135.48  
 135.21  
 135.17  
 135.08  
 135.04  
 133.34  
 133.15  
 129.28  
 128.51  
 128.28  
 128.22  
 112.96

— 55.18

34.97  
 34.90  
 34.64  
 34.57  
 27.58  
 27.47  
 26.96  
 26.85  
 25.99

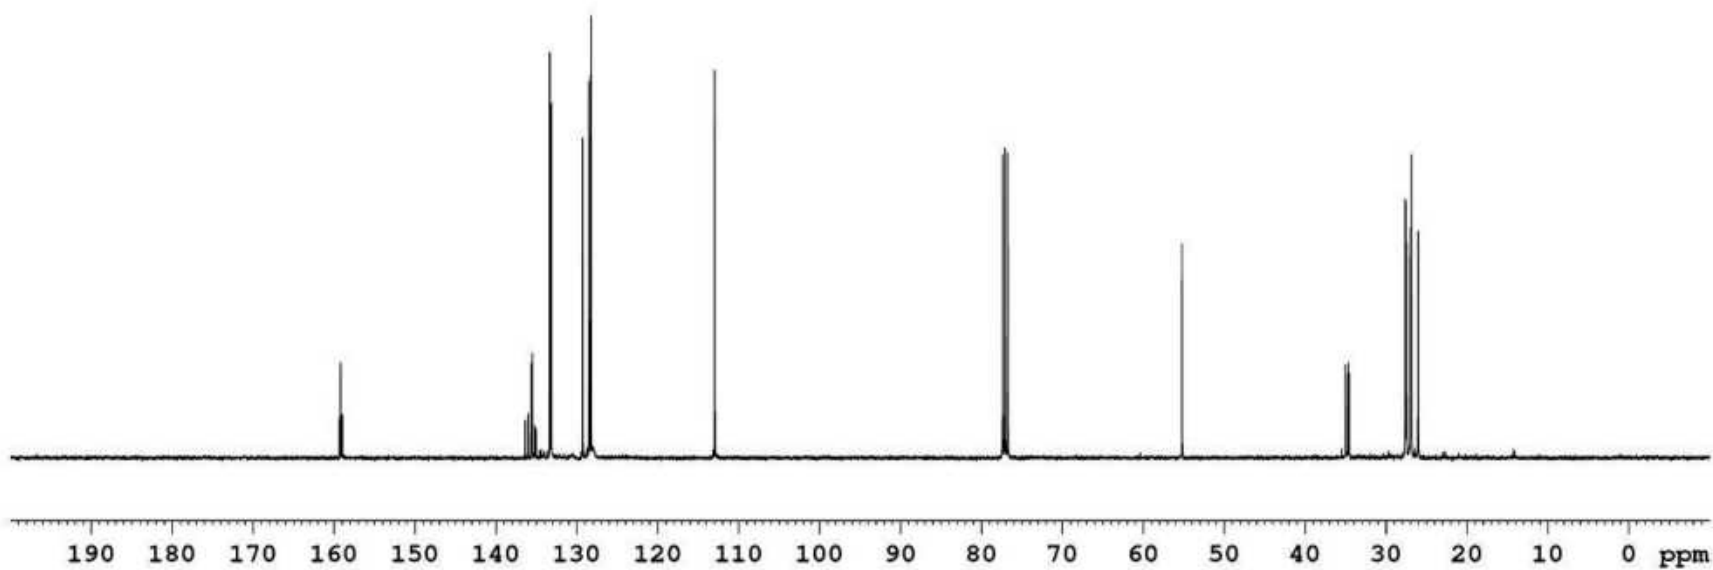

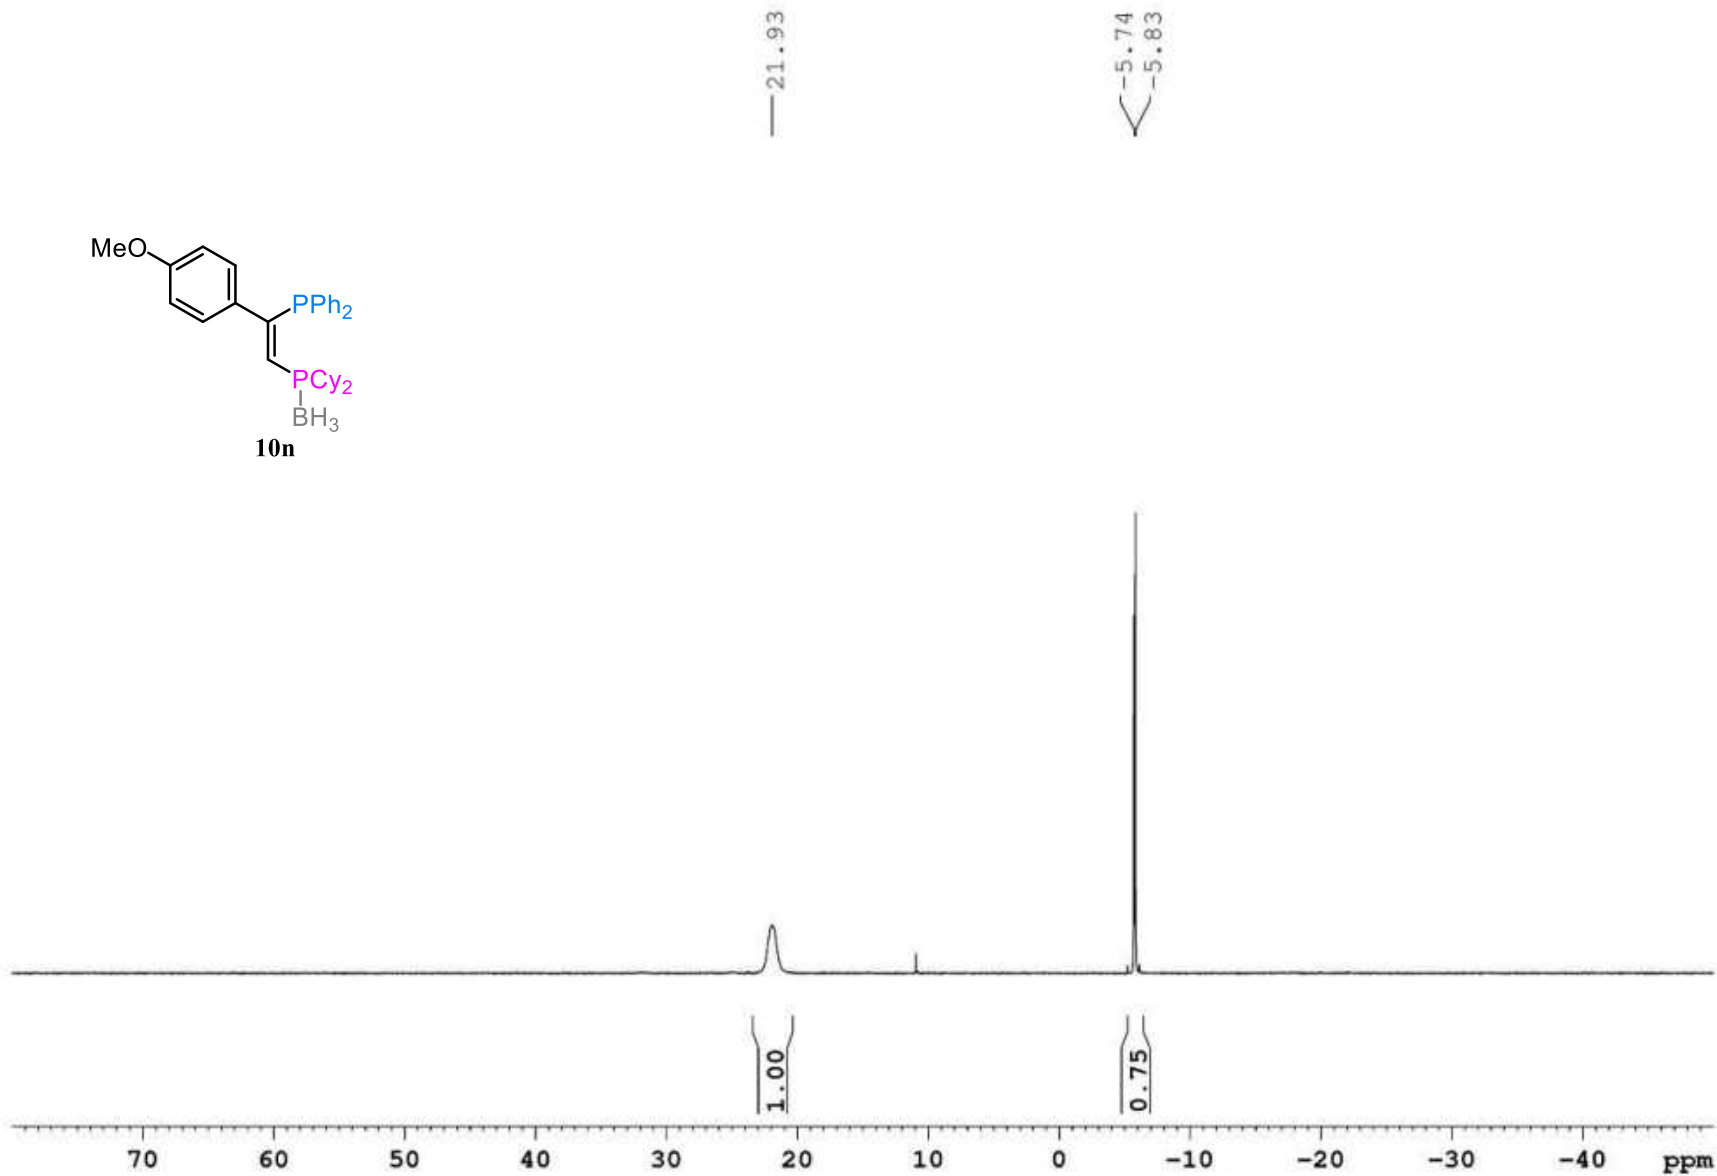

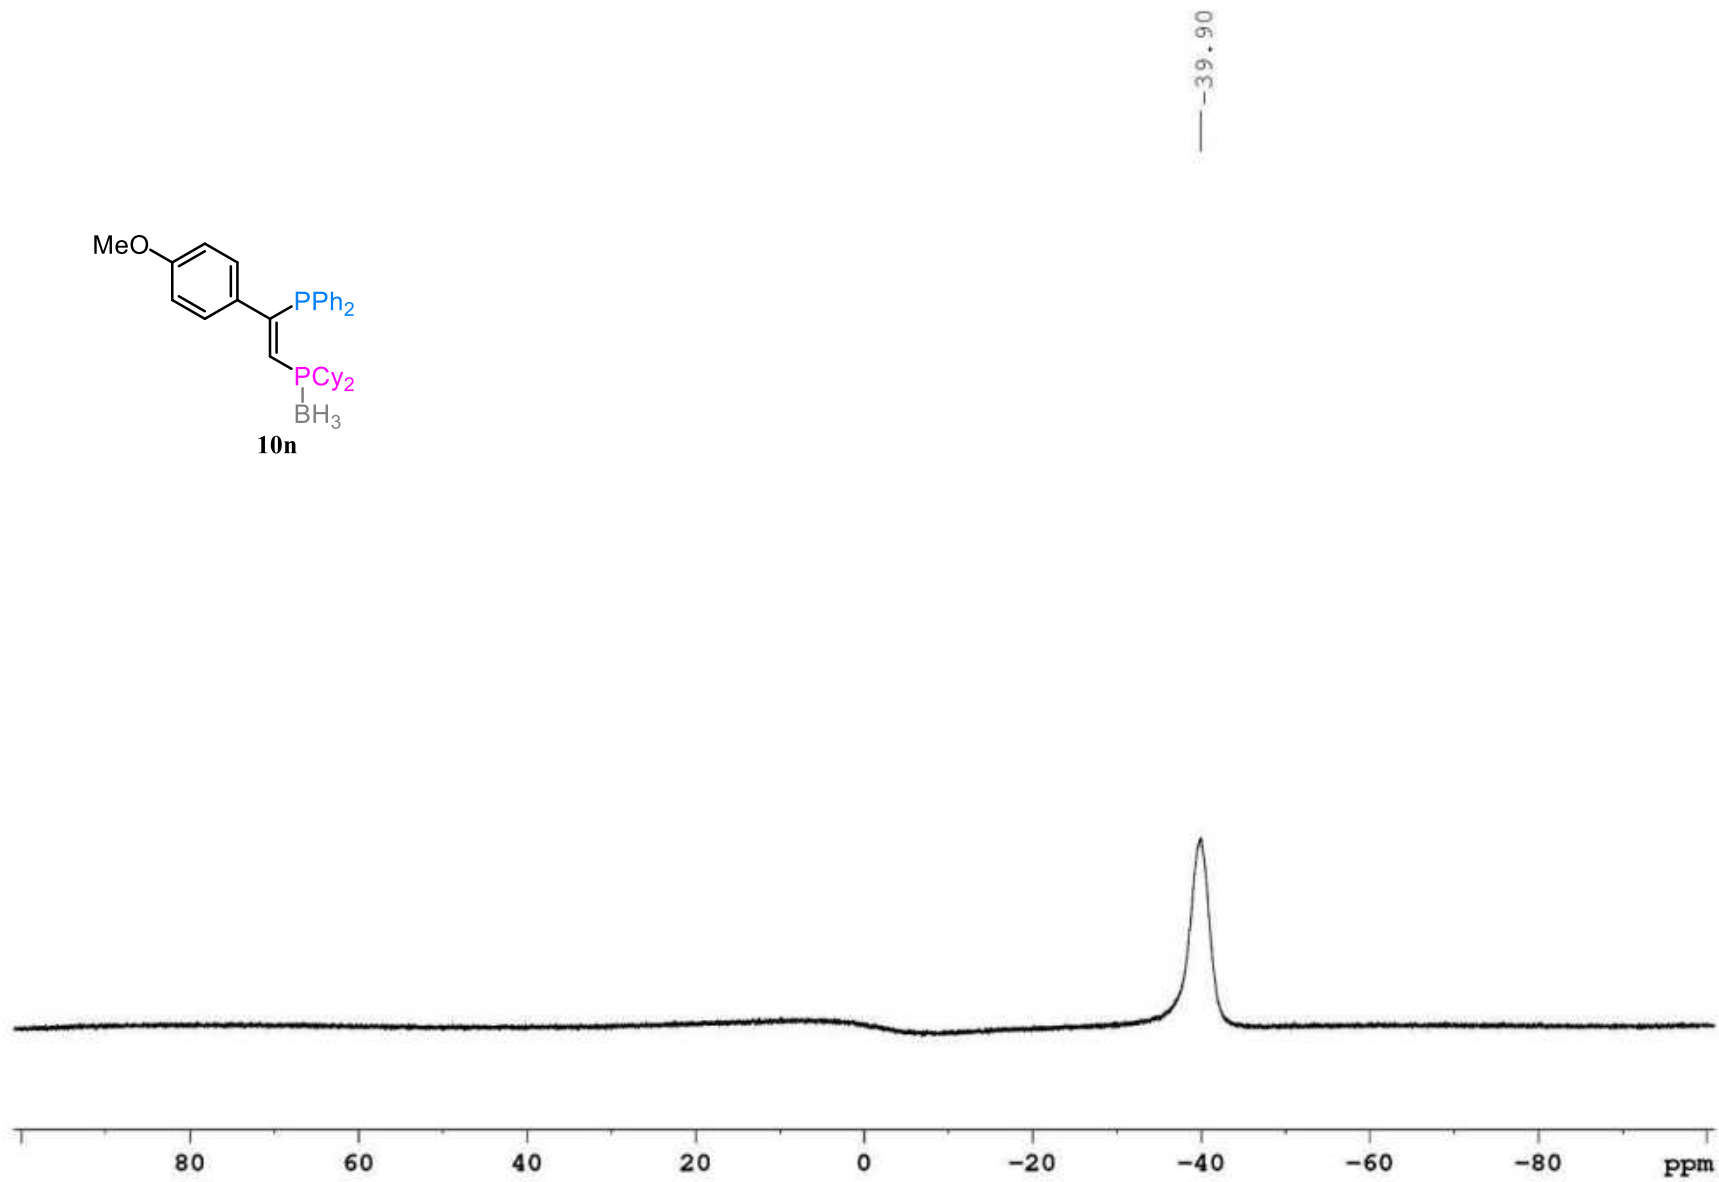



7.44  
7.43  
7.42  
7.42  
7.40  
7.40  
7.39  
7.38  
7.35  
7.34  
7.34  
7.26

5.88  
5.85  
5.79  
5.75

2.39  
2.39  
2.36  
2.33  
2.30  
1.92  
1.89  
1.76  
1.72  
1.65  
1.62  
1.54  
1.52  
1.45  
1.44  
1.41  
1.40  
1.34  
1.22  
1.19  
1.16  
1.09  
1.06  
1.03  
1.00  
0.87  
0.82  
0.58  
0.58  
0.56  
0.49  
0.18

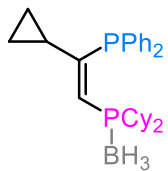

100

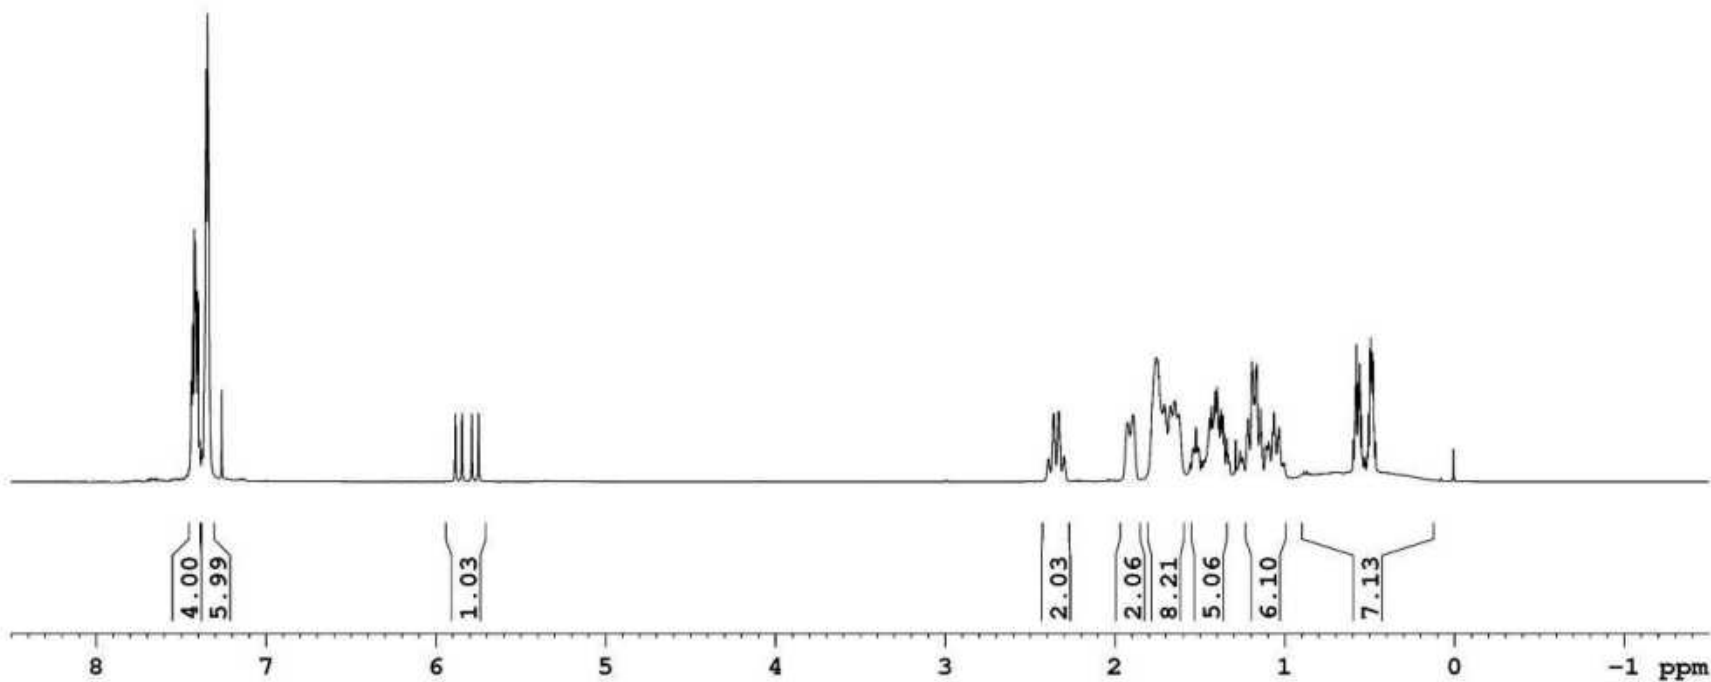

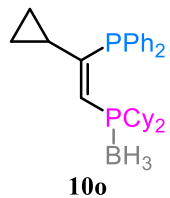

162.61  
162.37

136.03  
135.90  
133.35  
133.17  
128.63  
128.51  
128.45  
125.75  
125.39  
125.26  
124.89

34.85  
34.76  
34.52  
34.44  
27.66  
27.40  
26.88  
26.77  
26.67  
25.93  
19.01  
18.98  
18.88  
18.85  
11.08

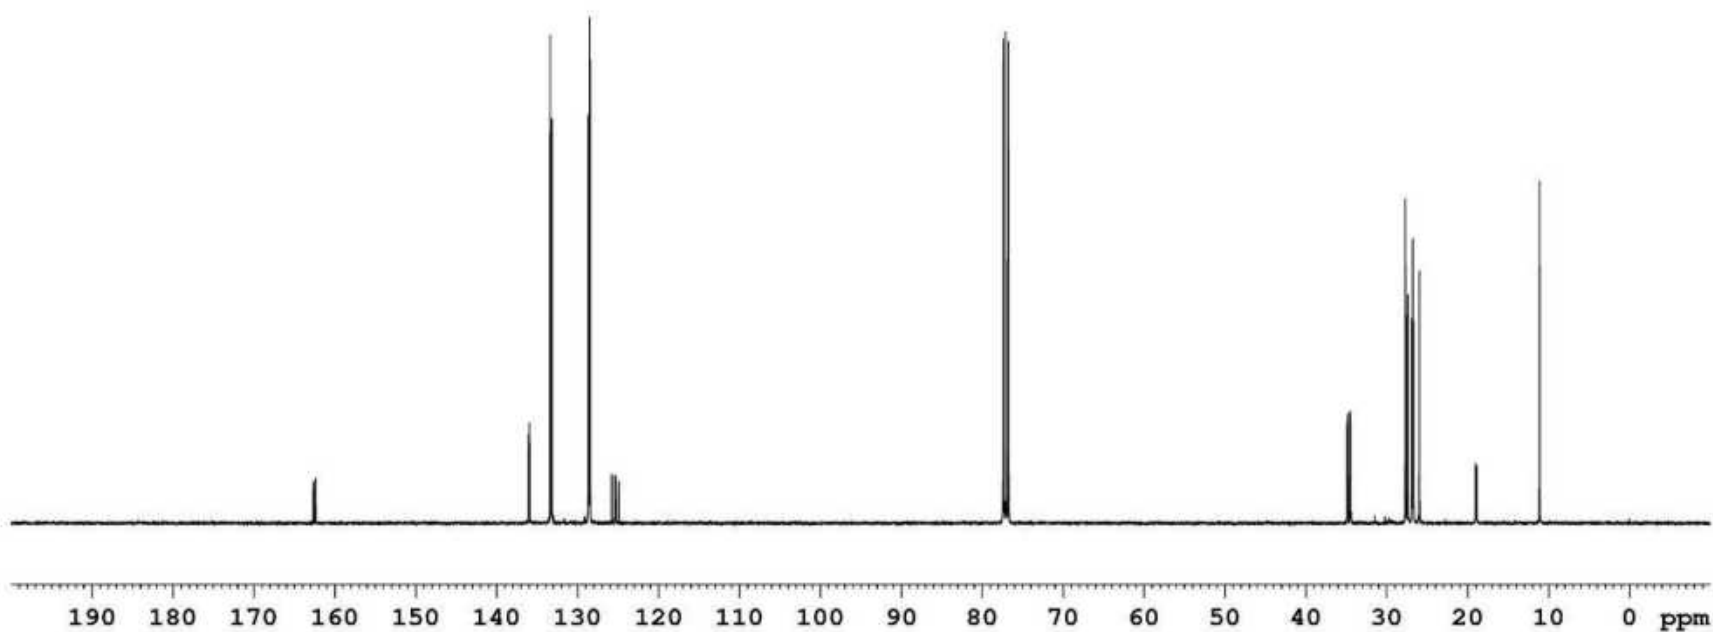

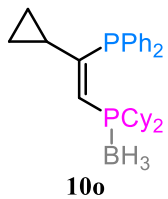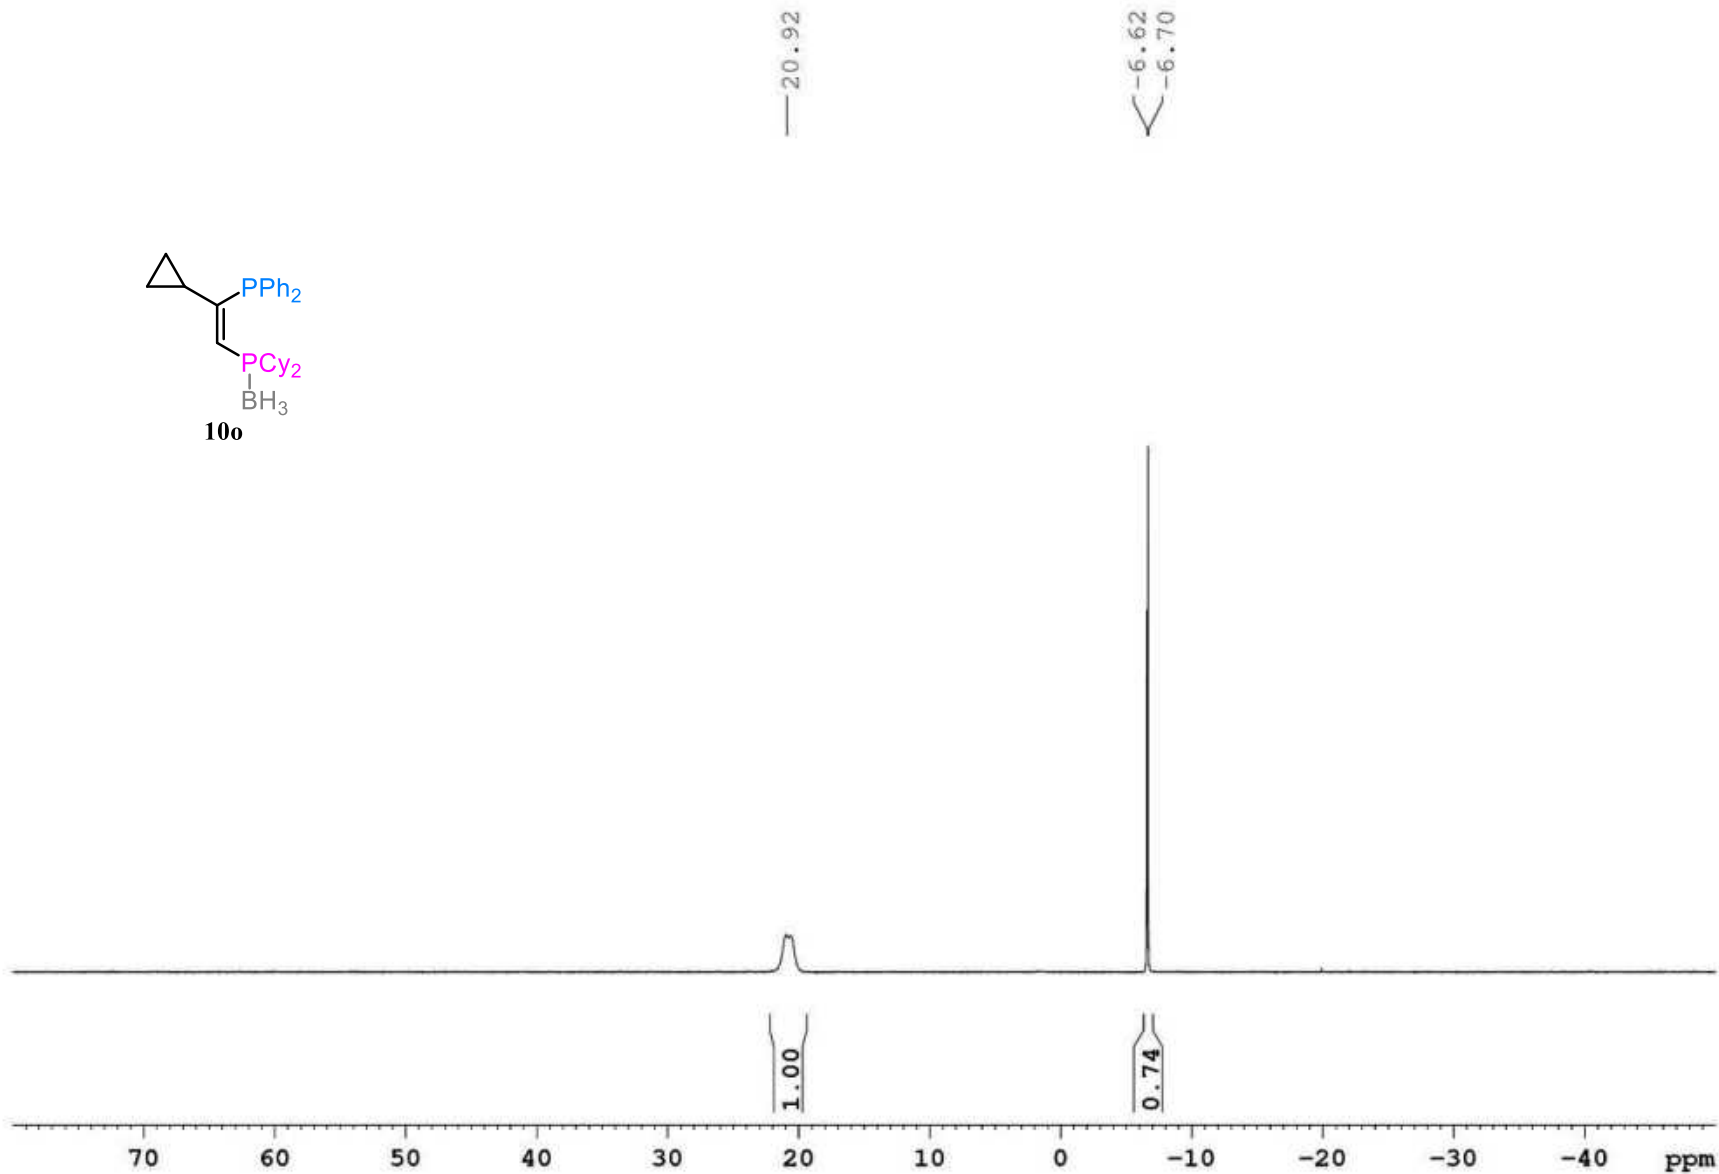

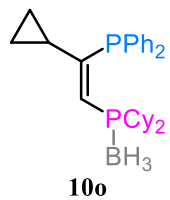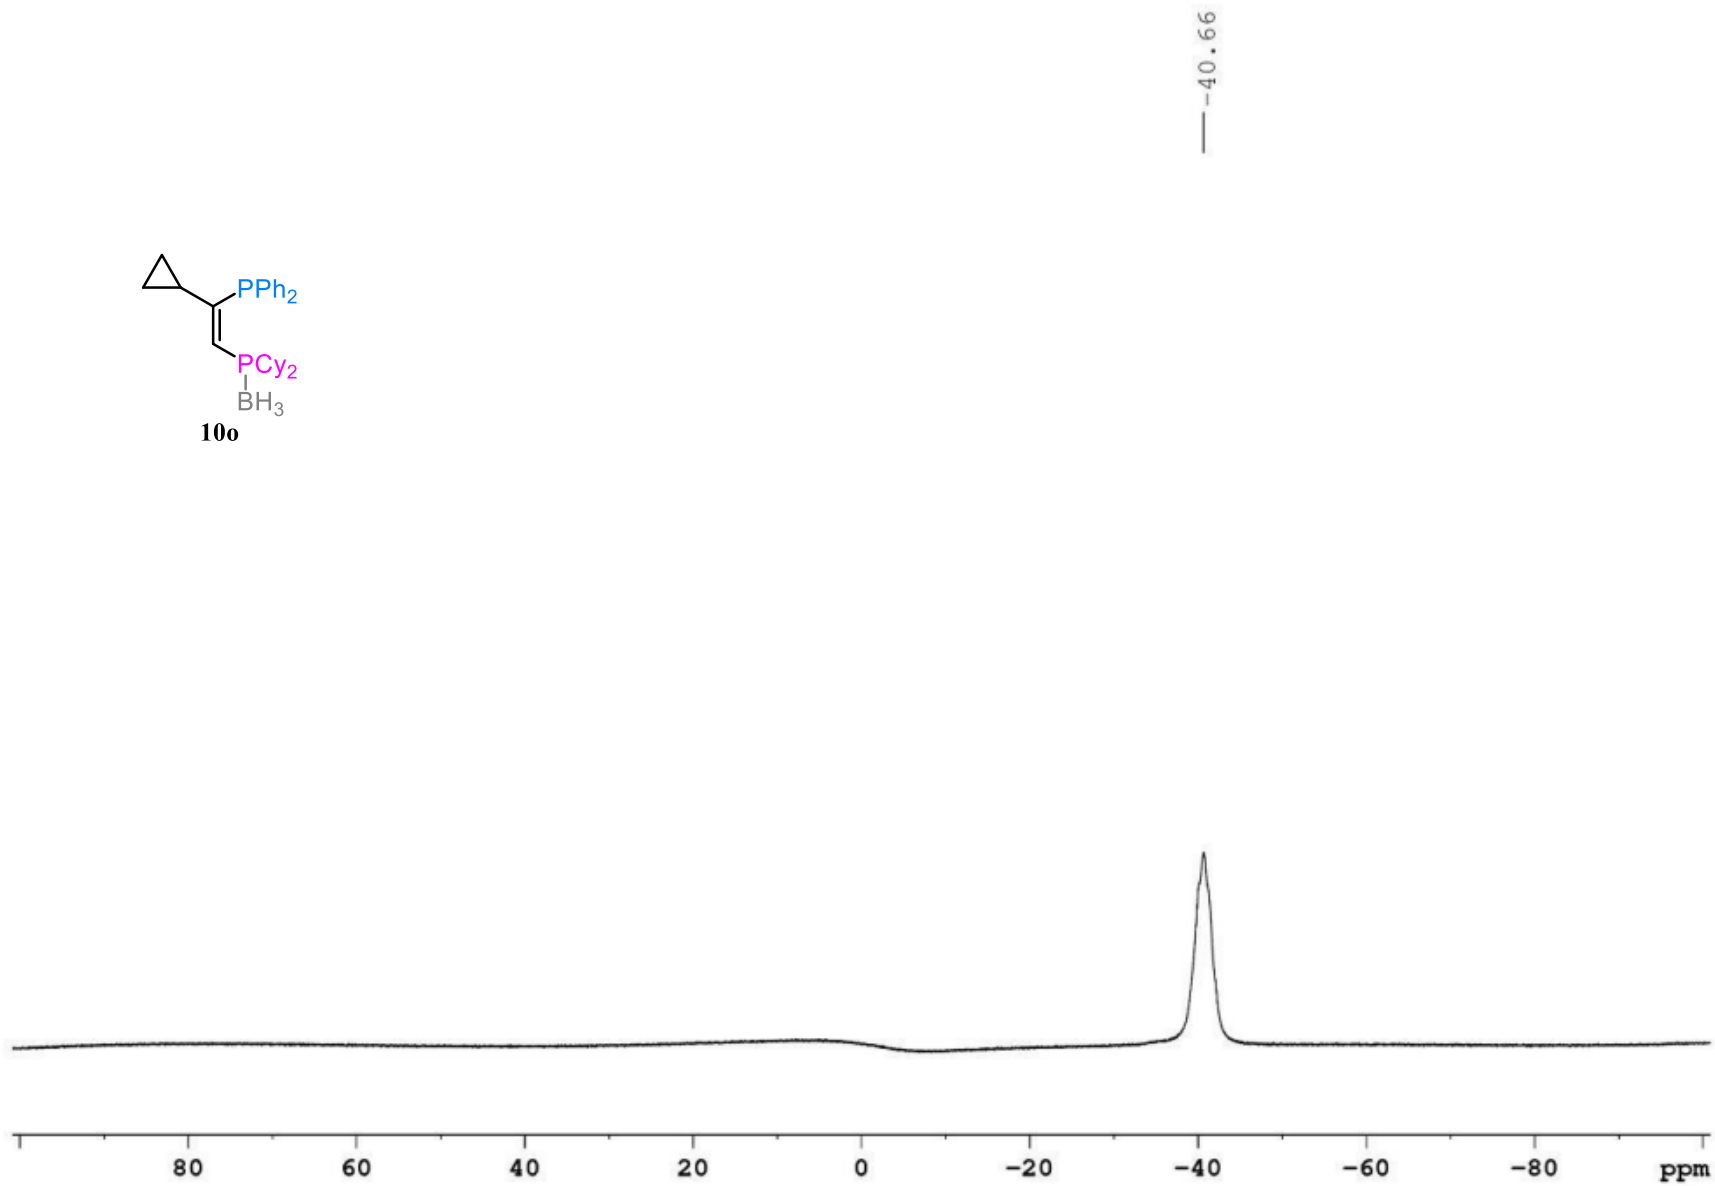

S461

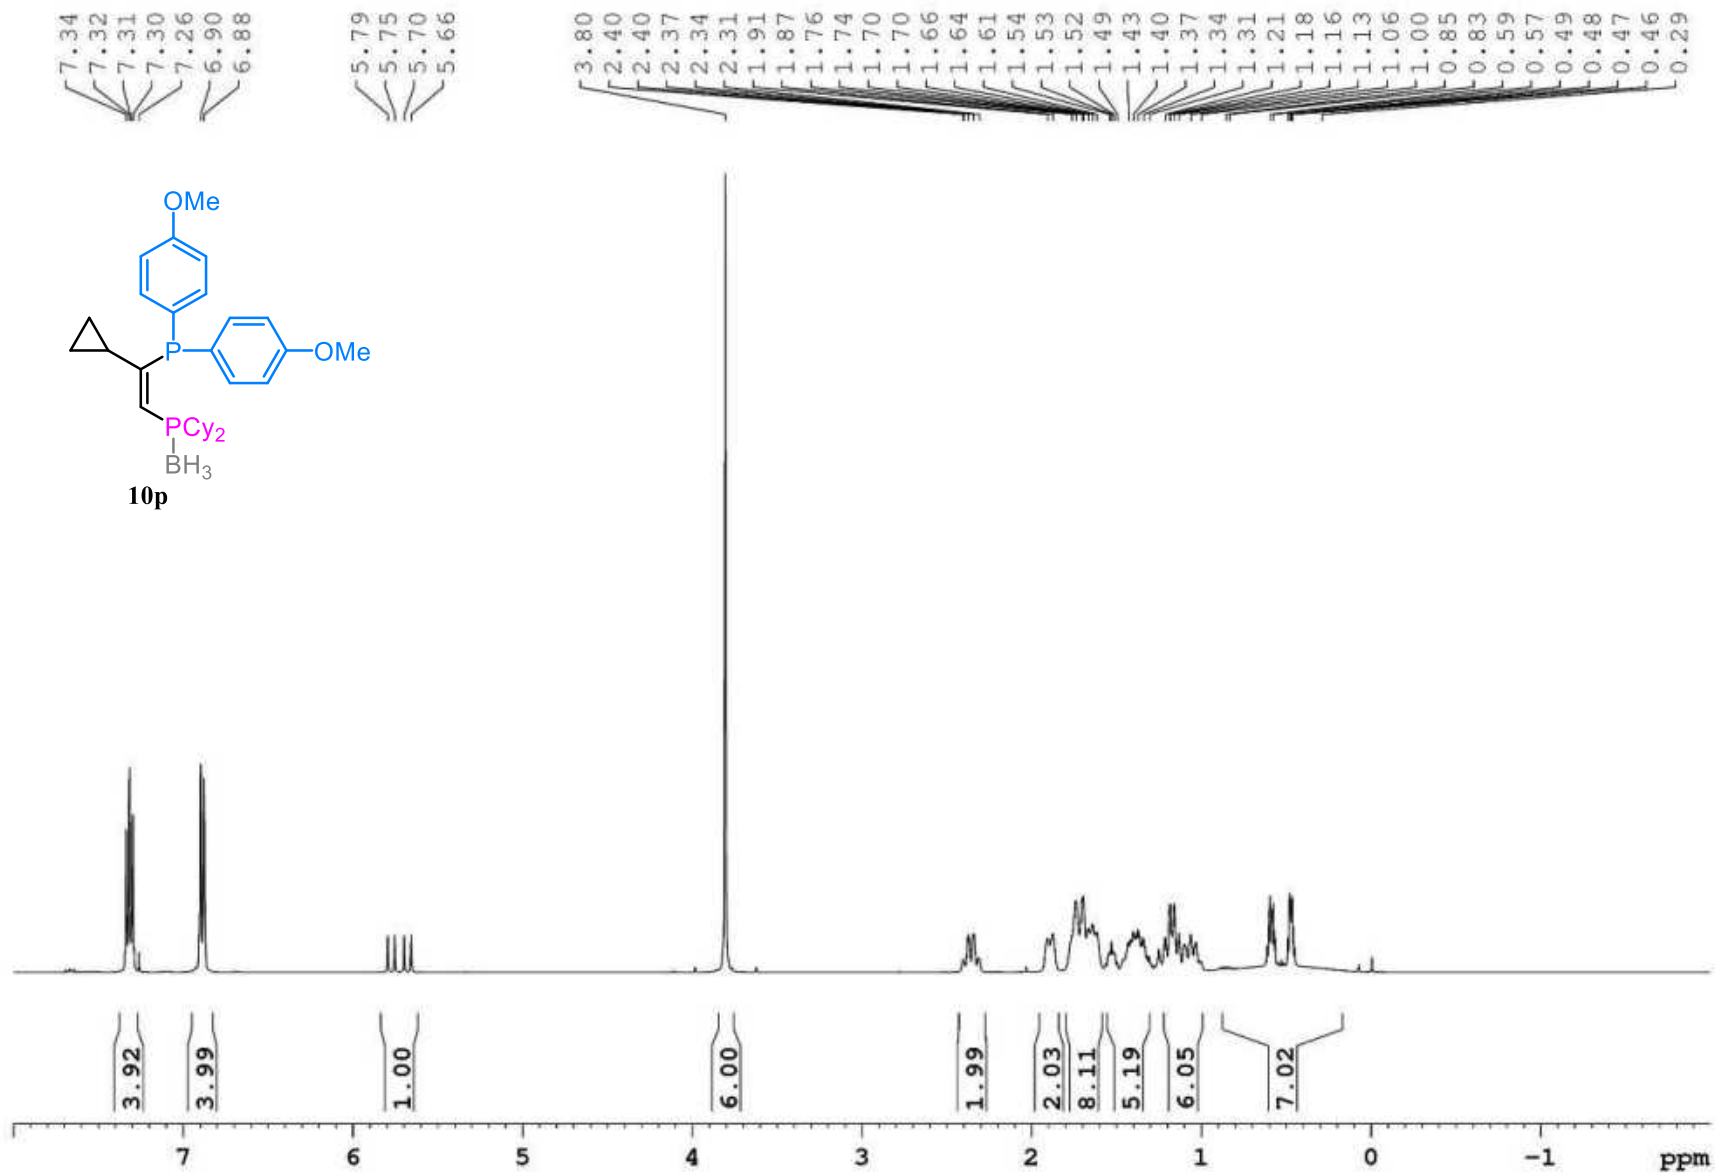

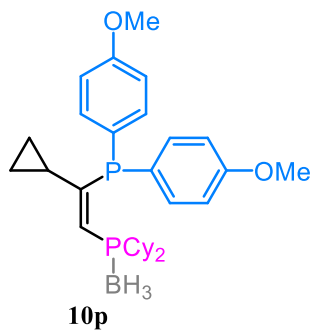

163.61  
163.36  
160.15

134.78  
134.58  
127.14  
127.04  
124.62  
124.25  
124.12  
123.75  
114.23  
114.16

55.21  
34.83  
34.74  
34.50  
34.41  
27.70  
27.40  
26.89  
26.79  
26.77  
26.69  
25.93  
18.64  
18.61  
18.51  
18.48  
11.03

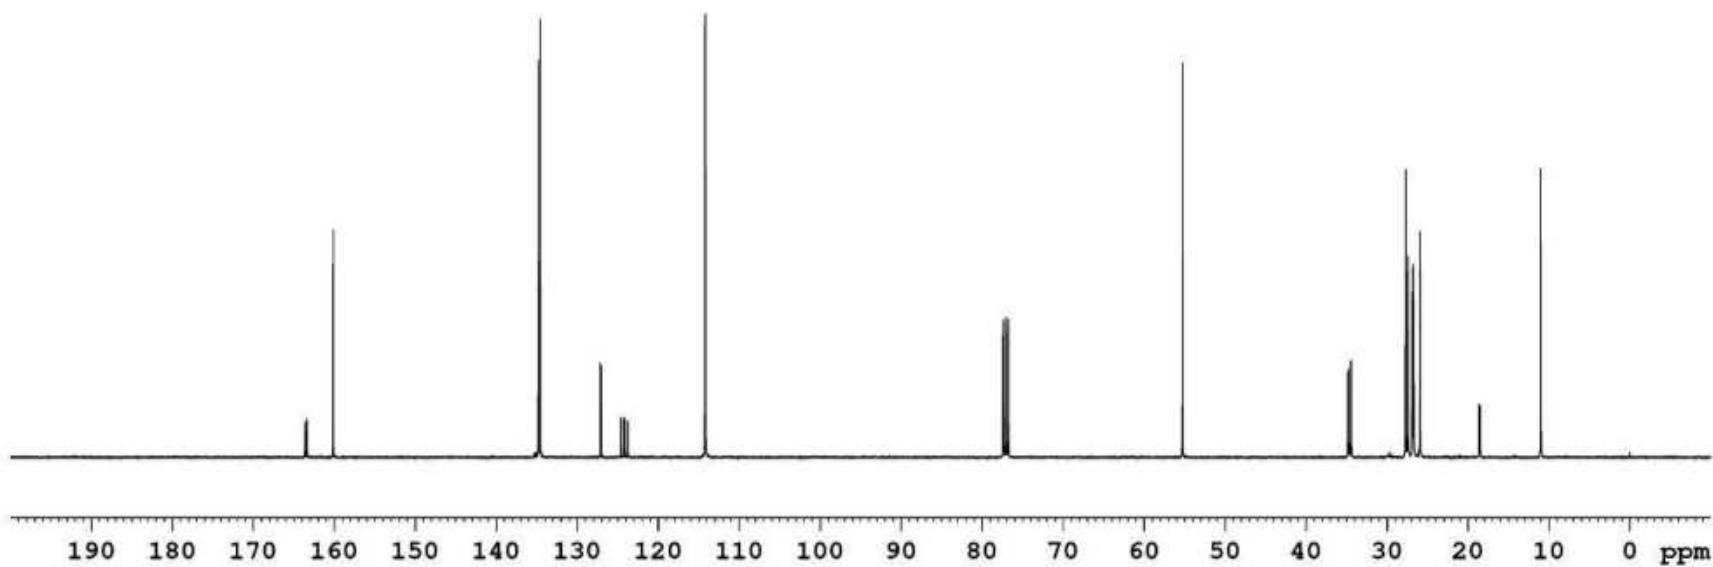

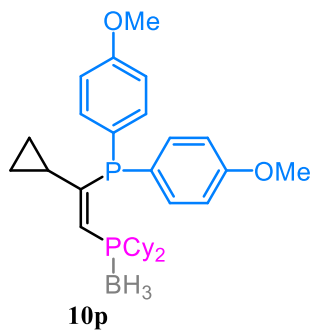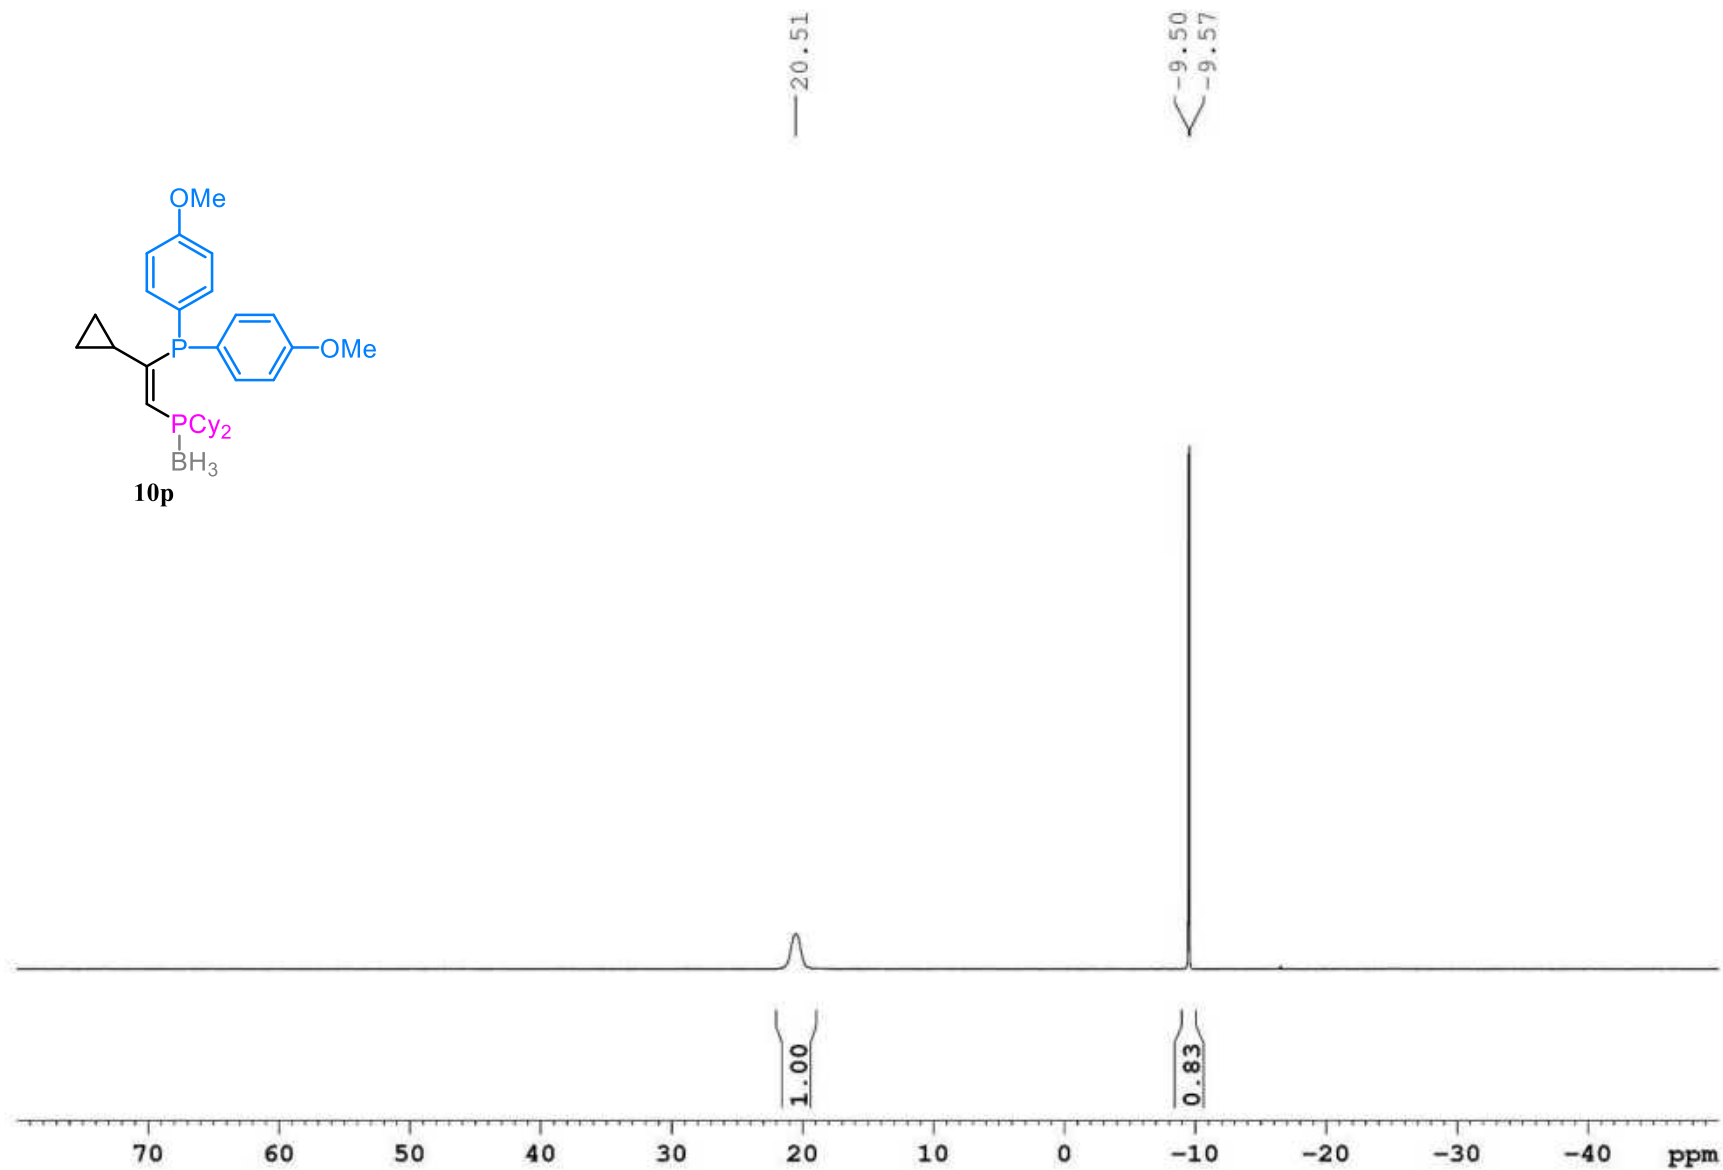



— -40.67

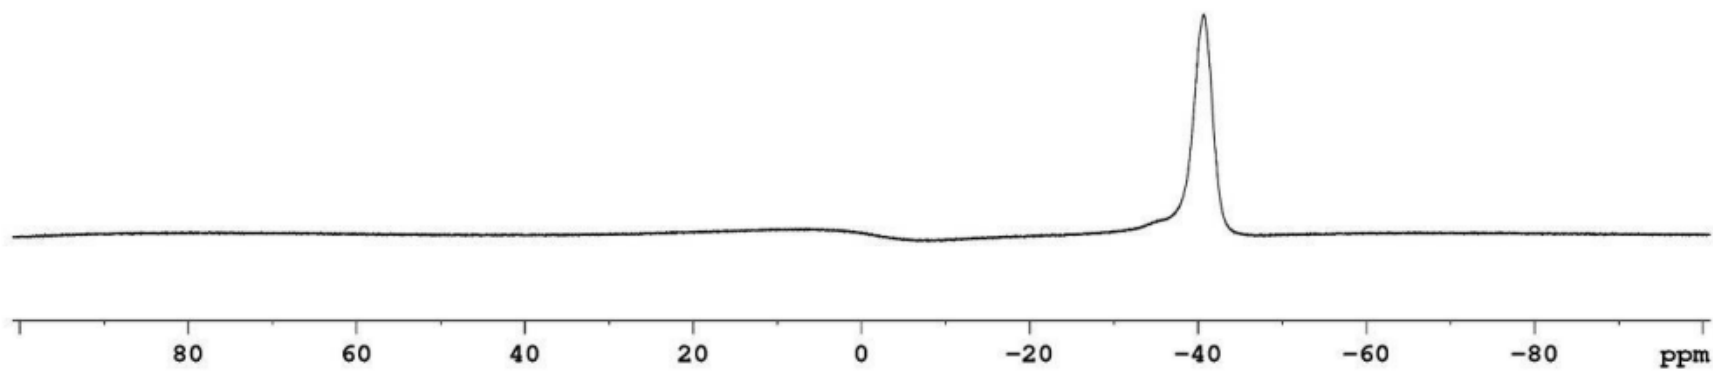

S465



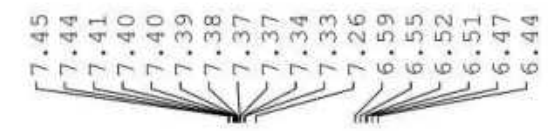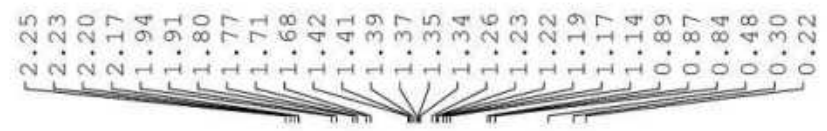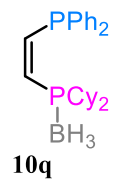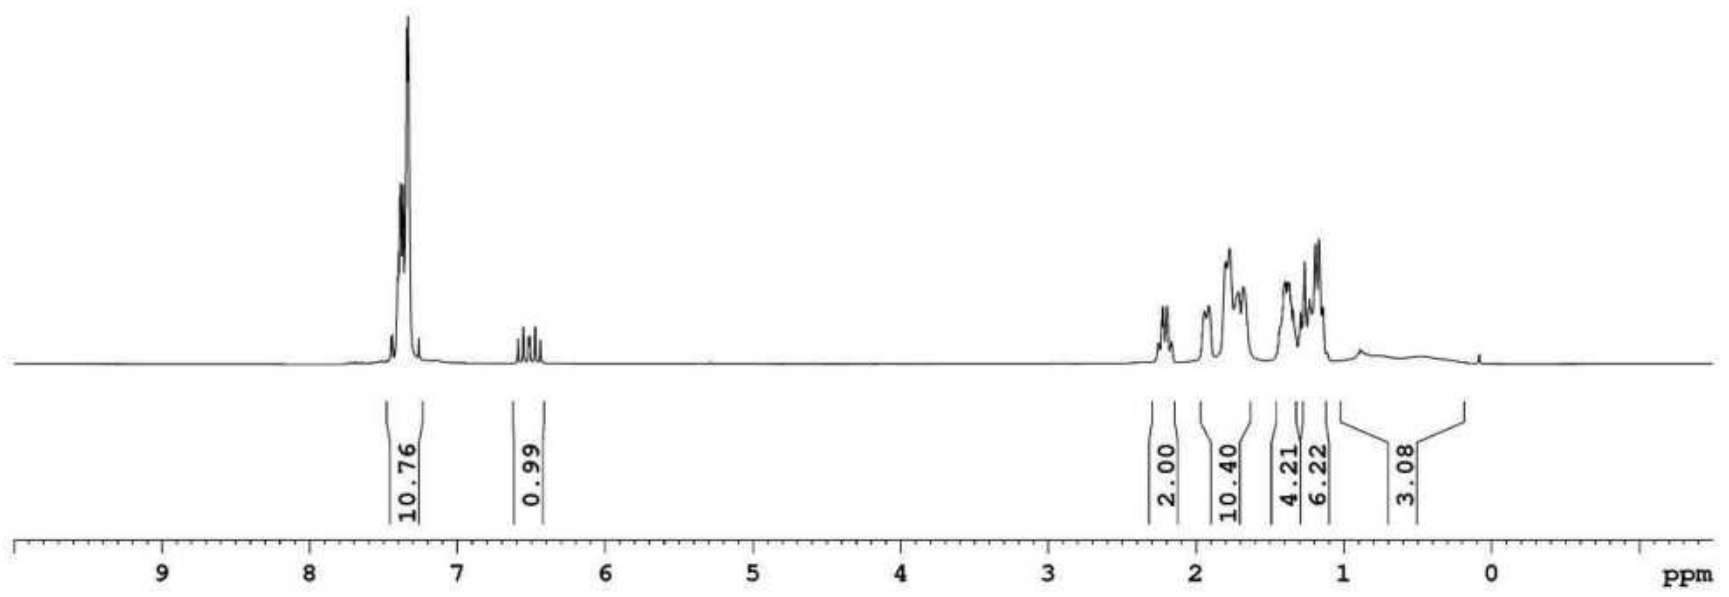

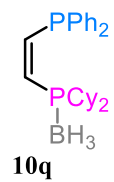

150.81  
150.61  
138.43  
138.32  
135.68  
135.41  
135.26  
134.98  
132.88  
132.69  
128.85  
128.69  
128.63

33.63  
33.57  
33.31  
33.25  
27.07  
27.04  
26.88  
26.78  
26.76  
26.68  
25.93

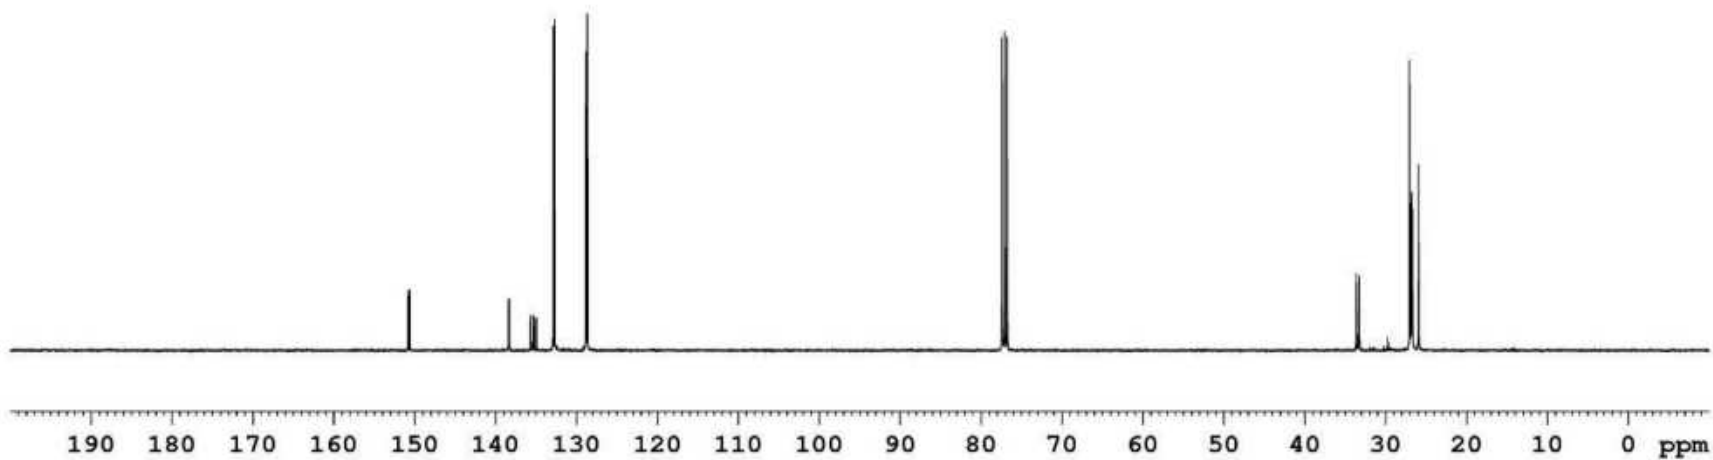

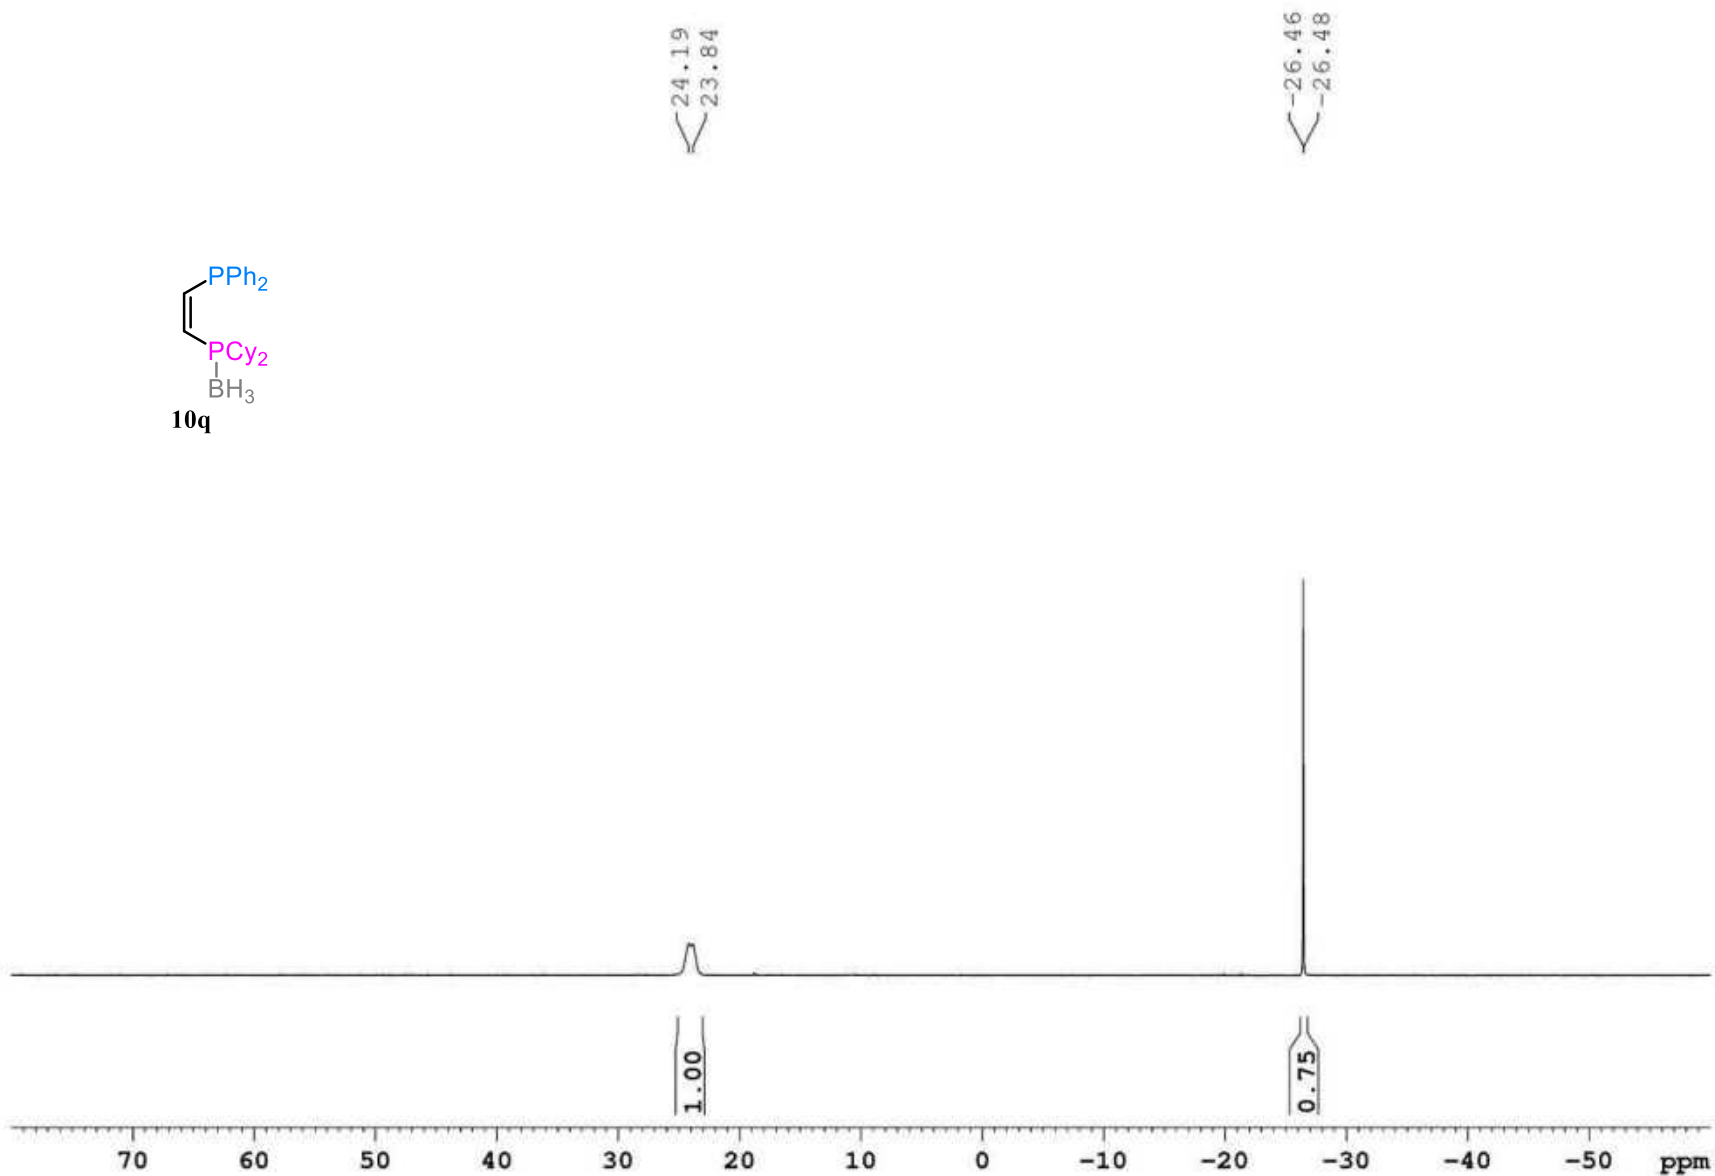

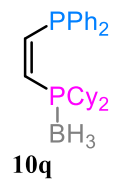

-41.07

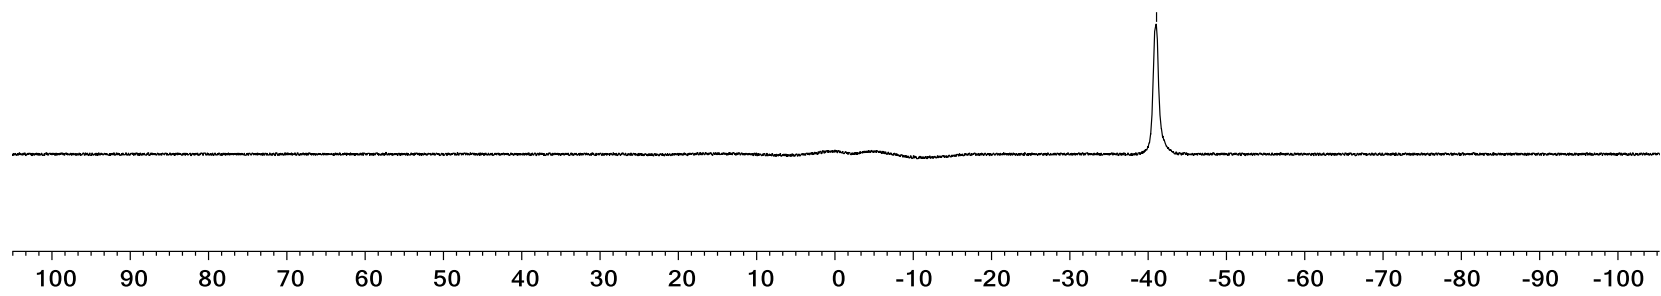

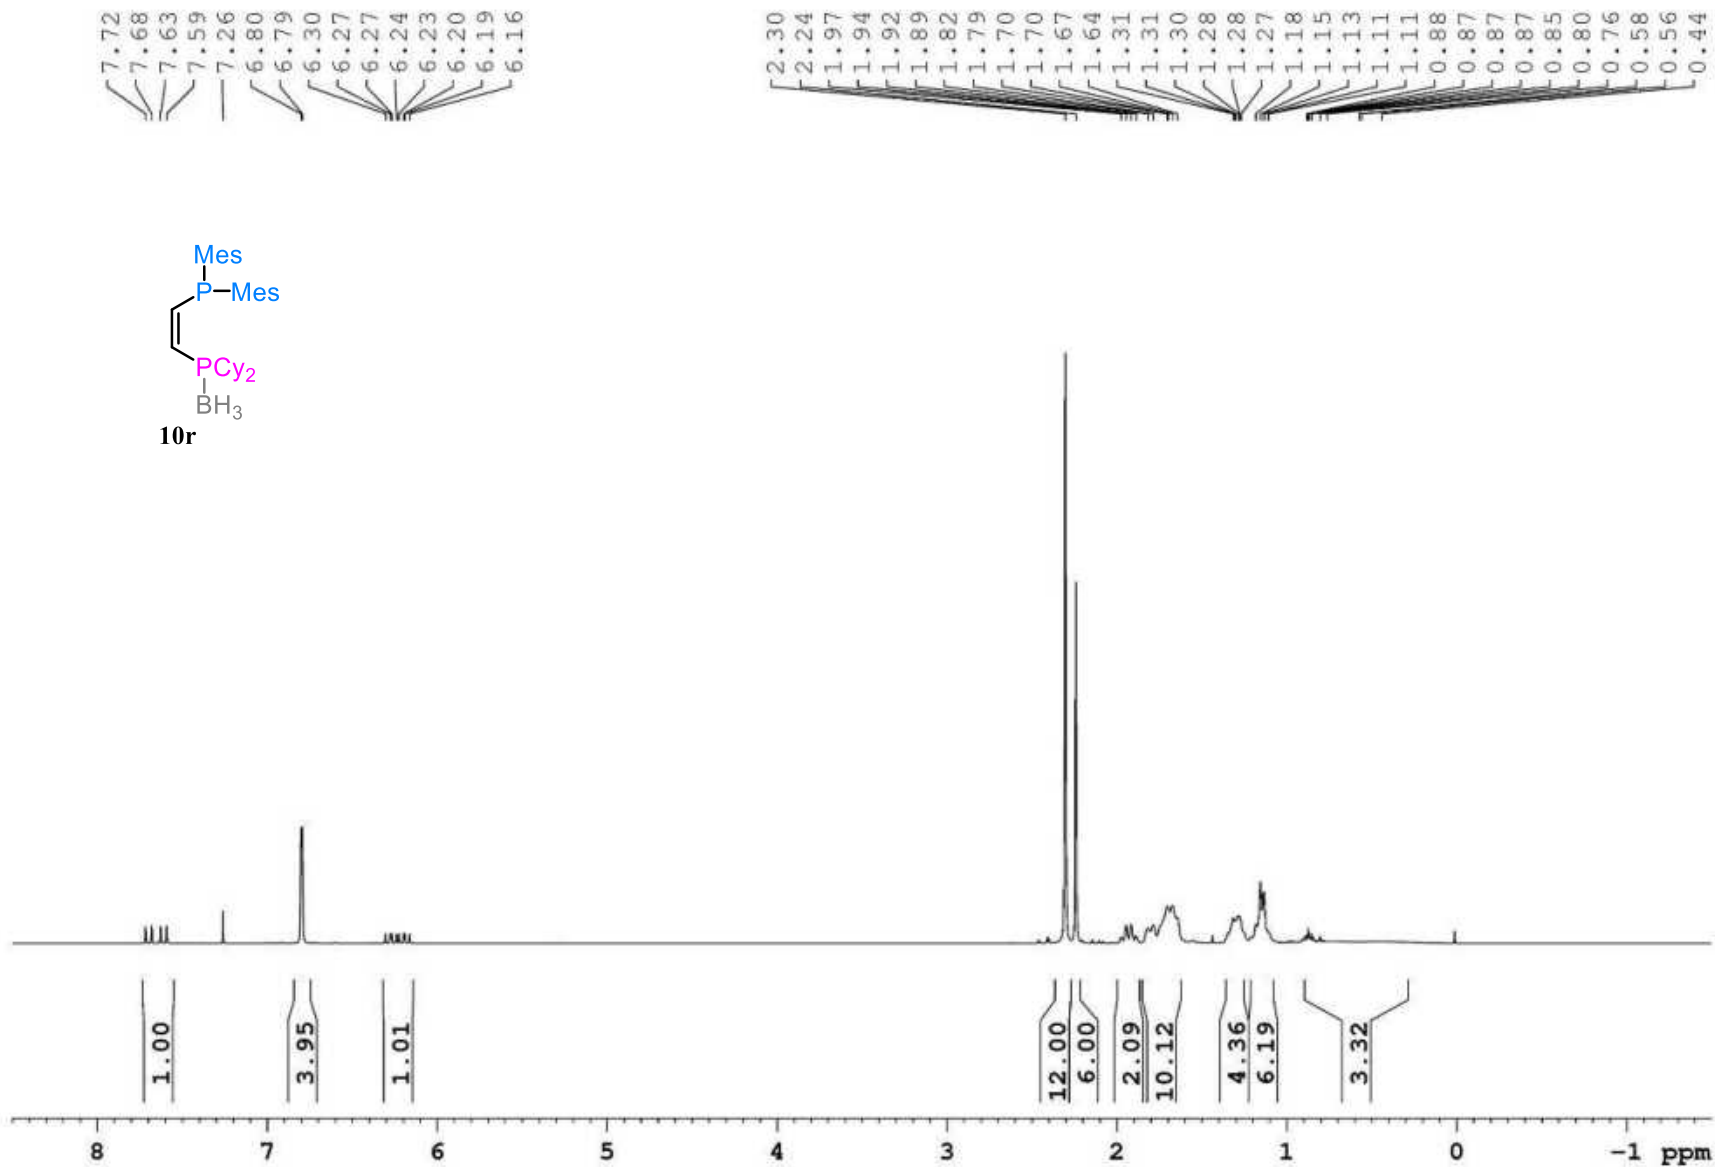

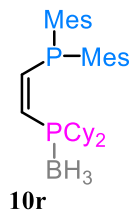

154.48  
154.26  
142.53  
142.38  
138.17  
132.46  
132.27  
130.70  
130.41  
130.26  
129.97  
129.94

33.41  
33.37  
33.07  
33.04  
27.04  
26.95  
26.84  
26.73  
25.94  
23.62  
23.48  
20.84

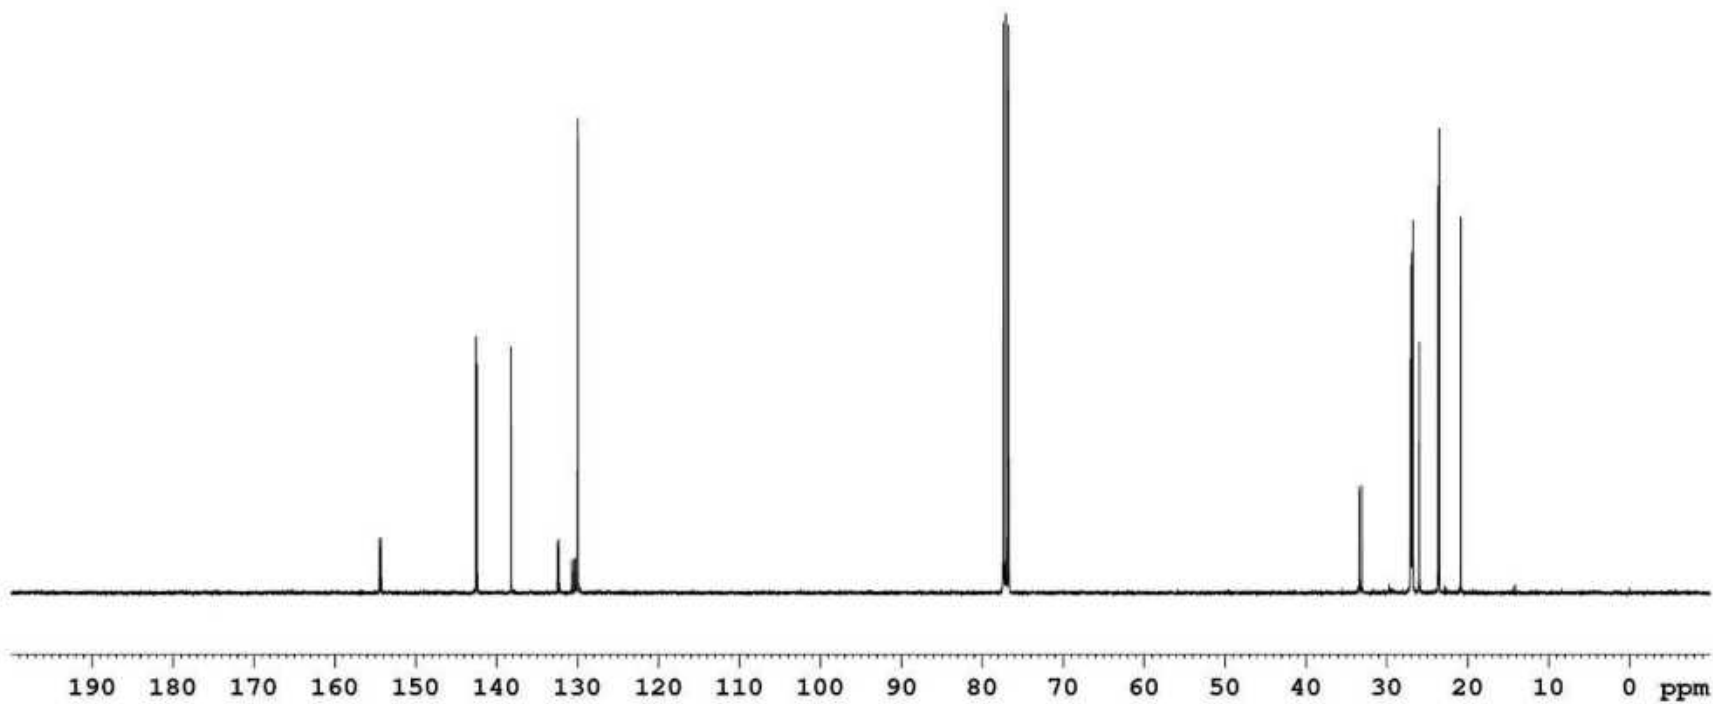

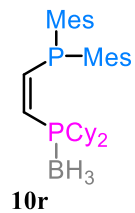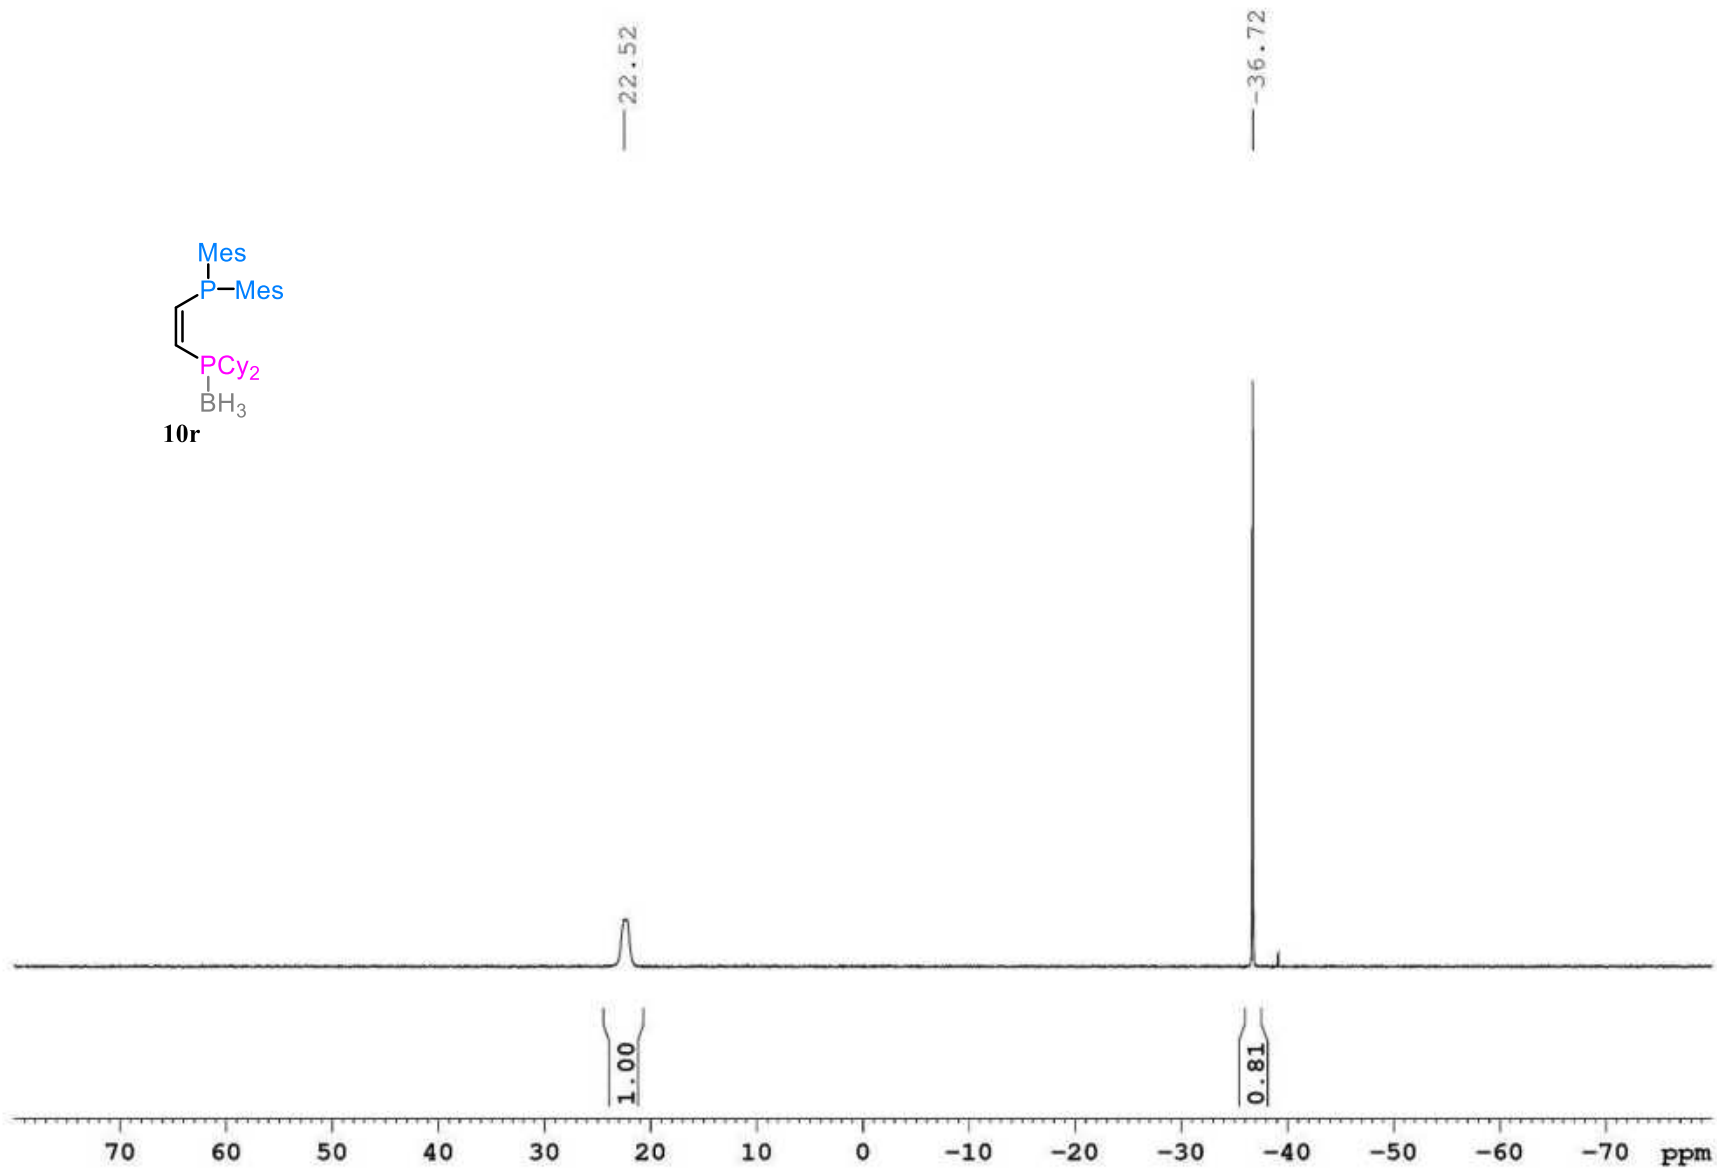

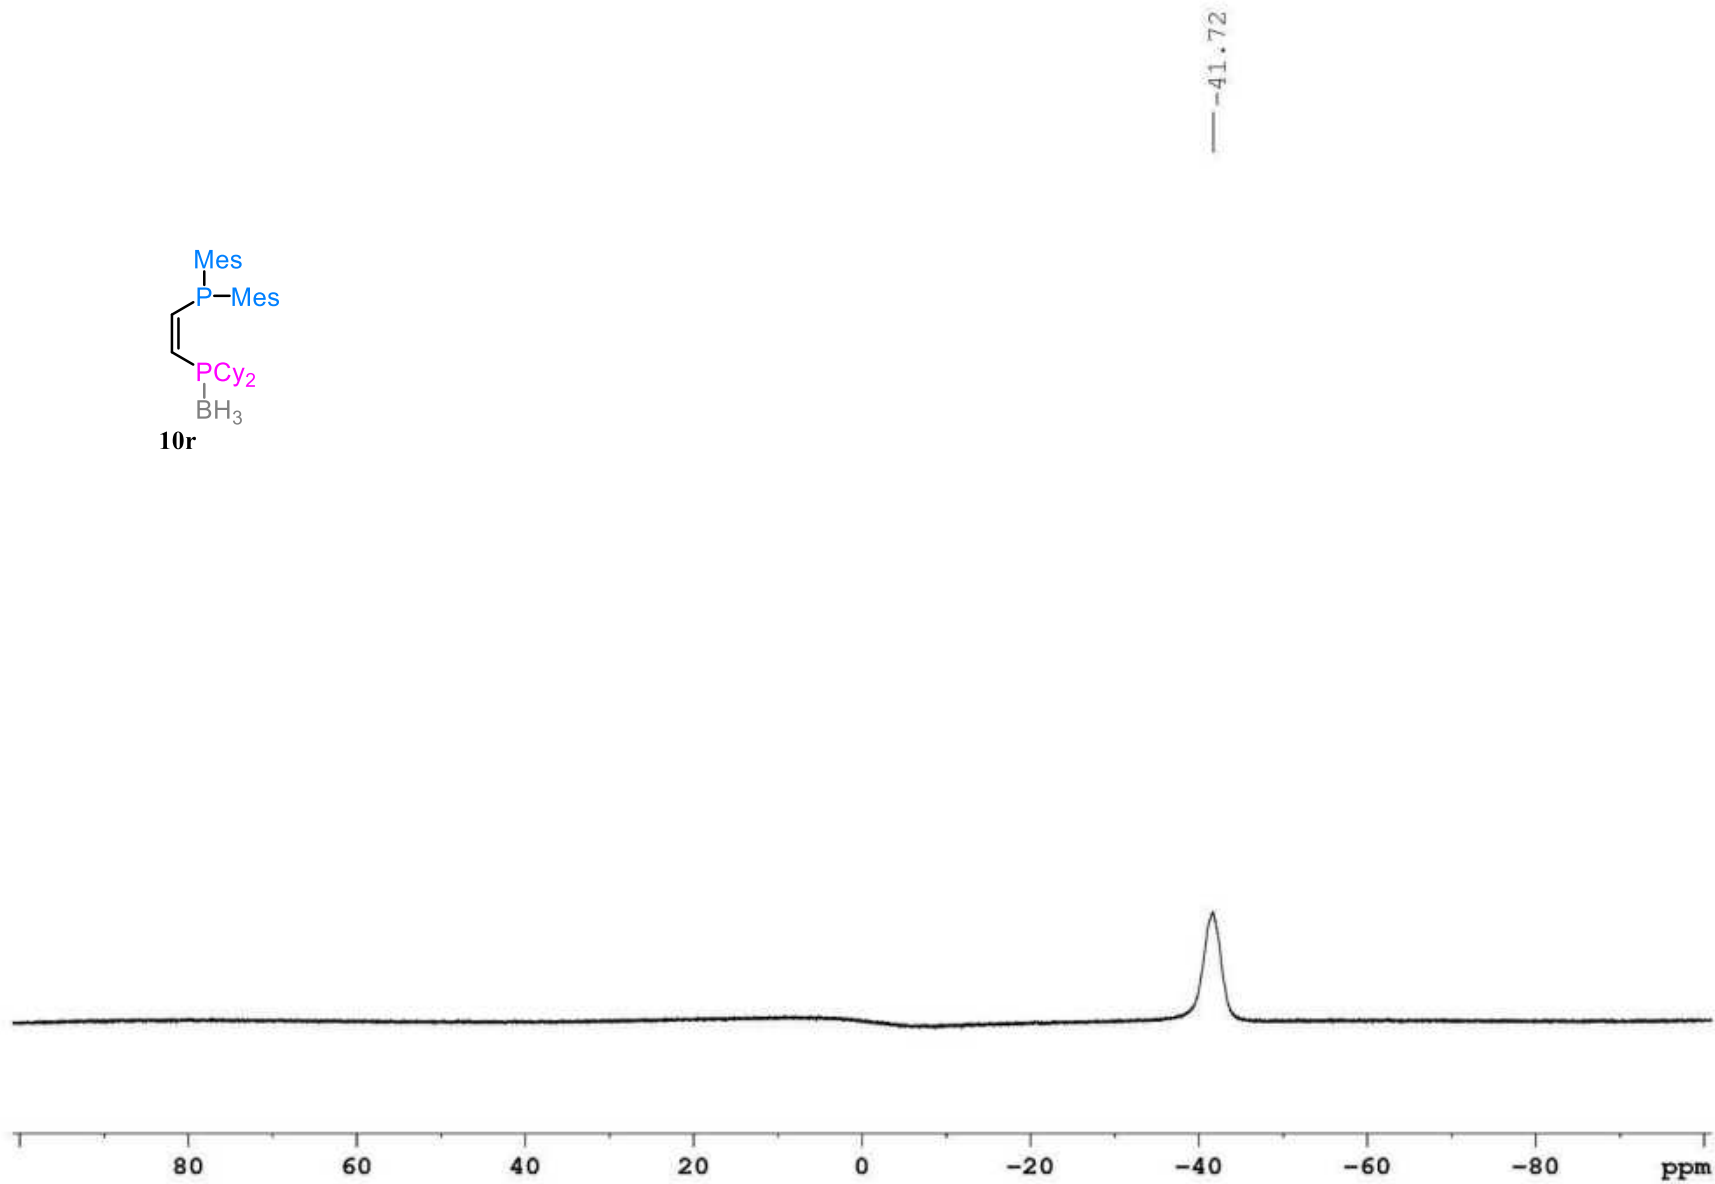

S473



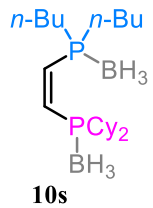

7.26  
6.88  
6.84  
6.80  
6.80  
6.76  
6.72  
6.64  
6.63  
6.60  
6.59  
6.56  
6.55  
6.52  
6.51

2.10  
2.07  
2.04  
2.03  
1.80  
1.72  
1.70  
1.60  
1.58  
1.56  
1.53  
1.46  
1.45  
1.43  
1.40  
1.39  
1.37  
1.33  
1.28  
1.27  
1.24  
1.22  
1.19  
1.17  
1.16  
0.92  
0.91  
0.89  
0.16

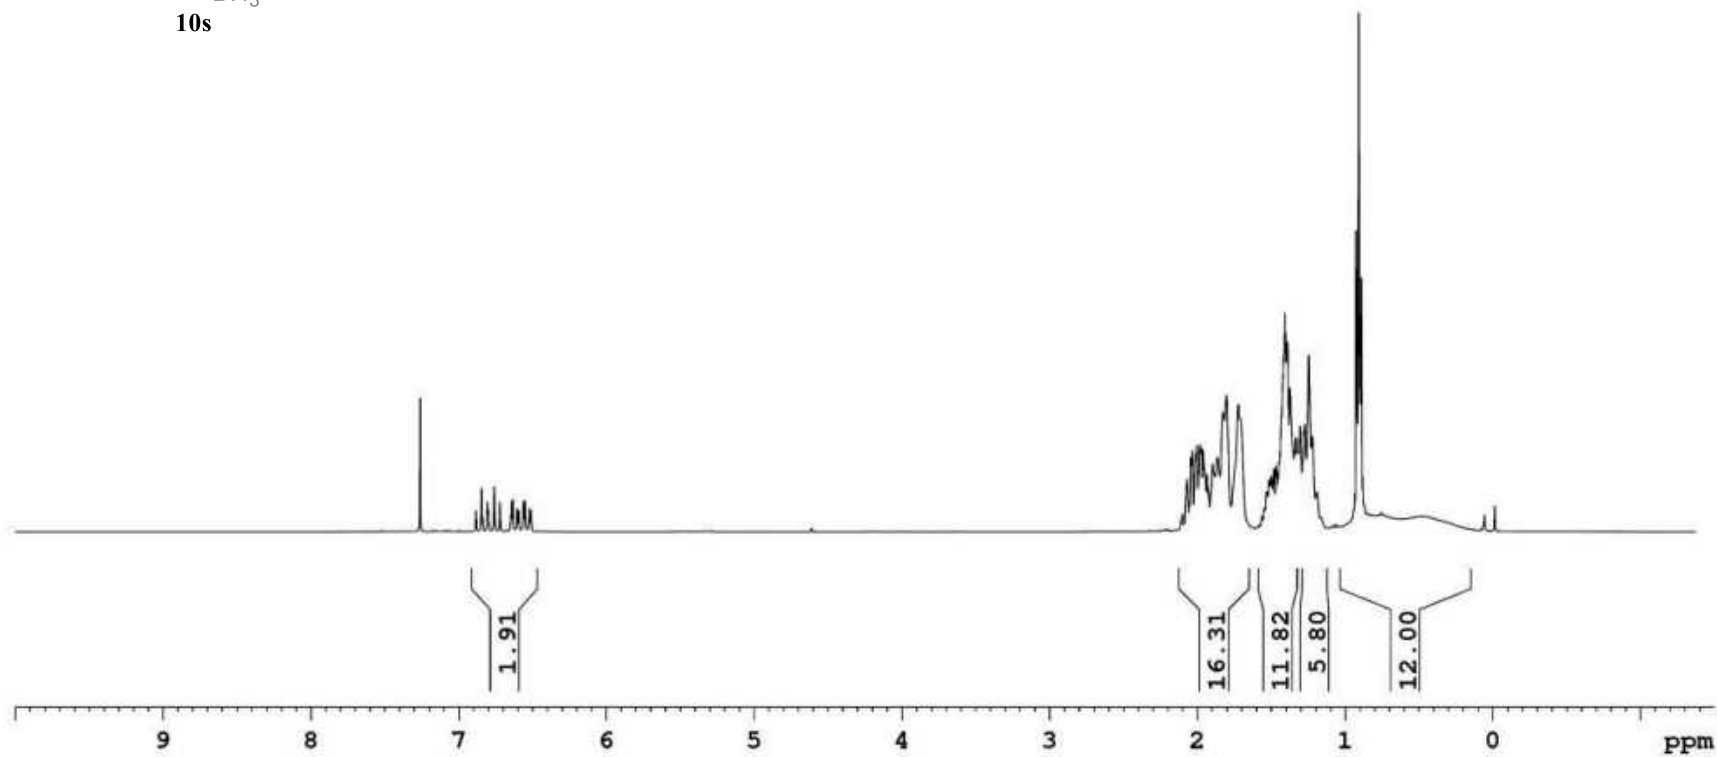

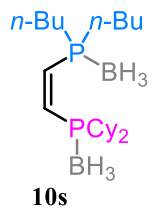

143.17  
 142.77  
 138.99  
 138.96  
 138.62  
 138.58

33.95  
 33.61  
 26.89  
 26.83  
 26.82  
 26.80  
 26.73  
 26.62  
 25.87  
 25.86  
 25.35  
 25.25  
 25.23  
 25.00  
 24.29  
 24.15  
 13.65

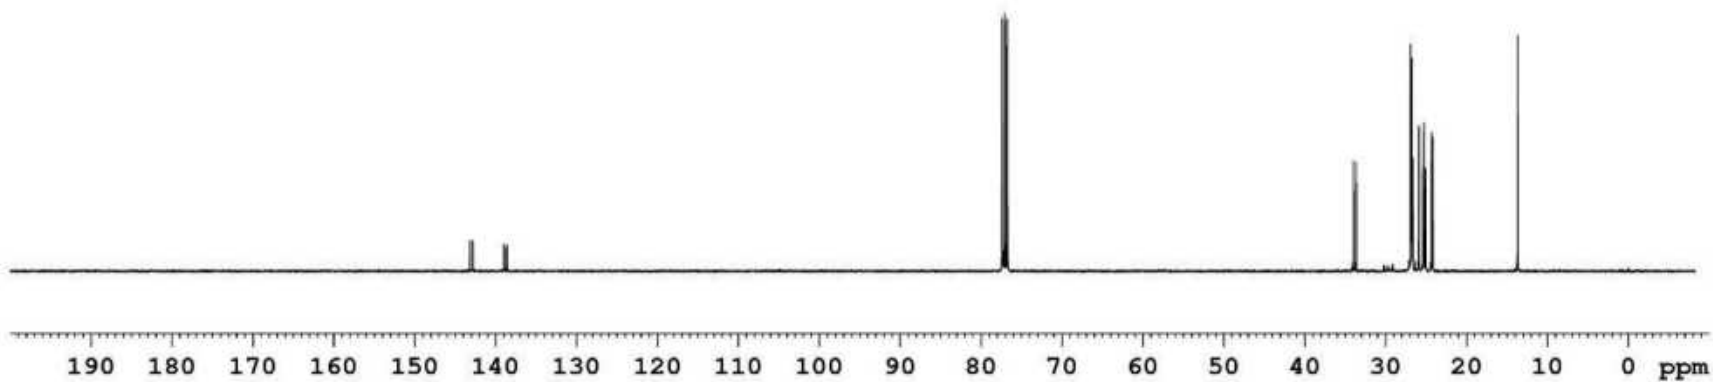

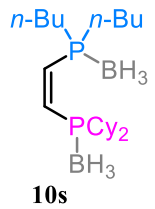

—21.05  
<10.70  
10.34

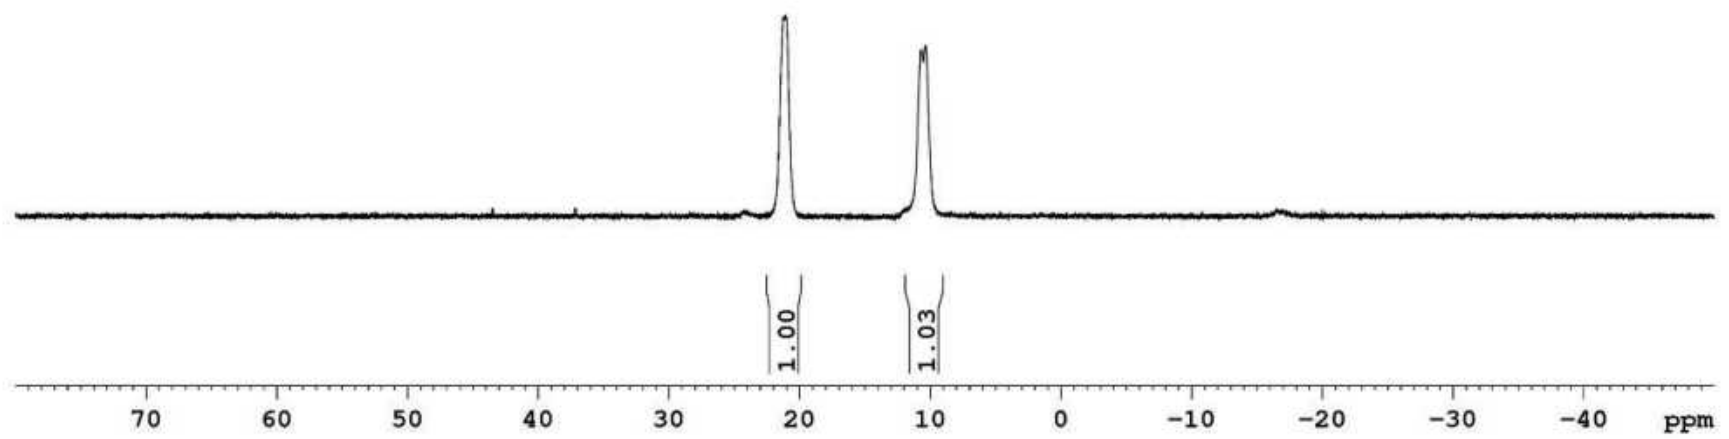

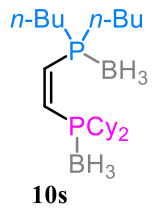

-38.35  
-40.94

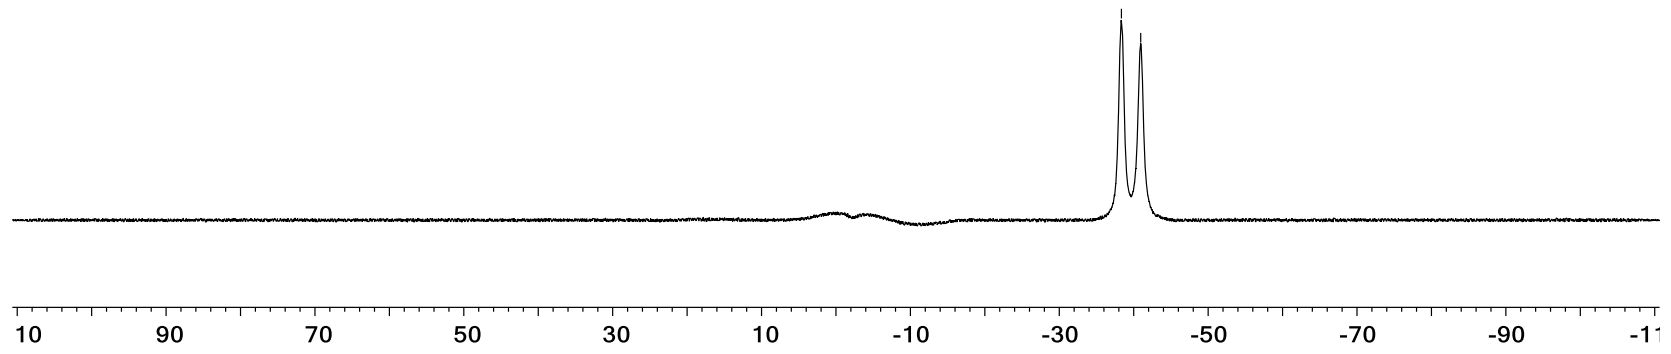

S477

7.76  
7.73  
7.71  
7.51  
7.49  
7.47  
7.45  
7.43  
7.41  
7.26  
7.12  
7.10  
7.08  
7.06  
7.04  
7.02  
7.00  
6.98  
6.78  
6.74  
6.74  
6.71  
6.69  
6.66  
6.65  
6.62

2.67  
2.64  
2.58  
2.41  
2.32  
2.06  
2.03  
1.97  
1.93  
1.88  
1.86  
1.76  
1.73  
1.66  
1.63  
1.54  
1.49  
1.46  
1.39  
1.33  
1.25  
1.17  
1.13  
1.06  
0.41  
0.37  
-0.00

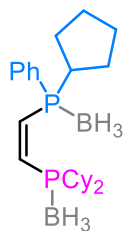

10t

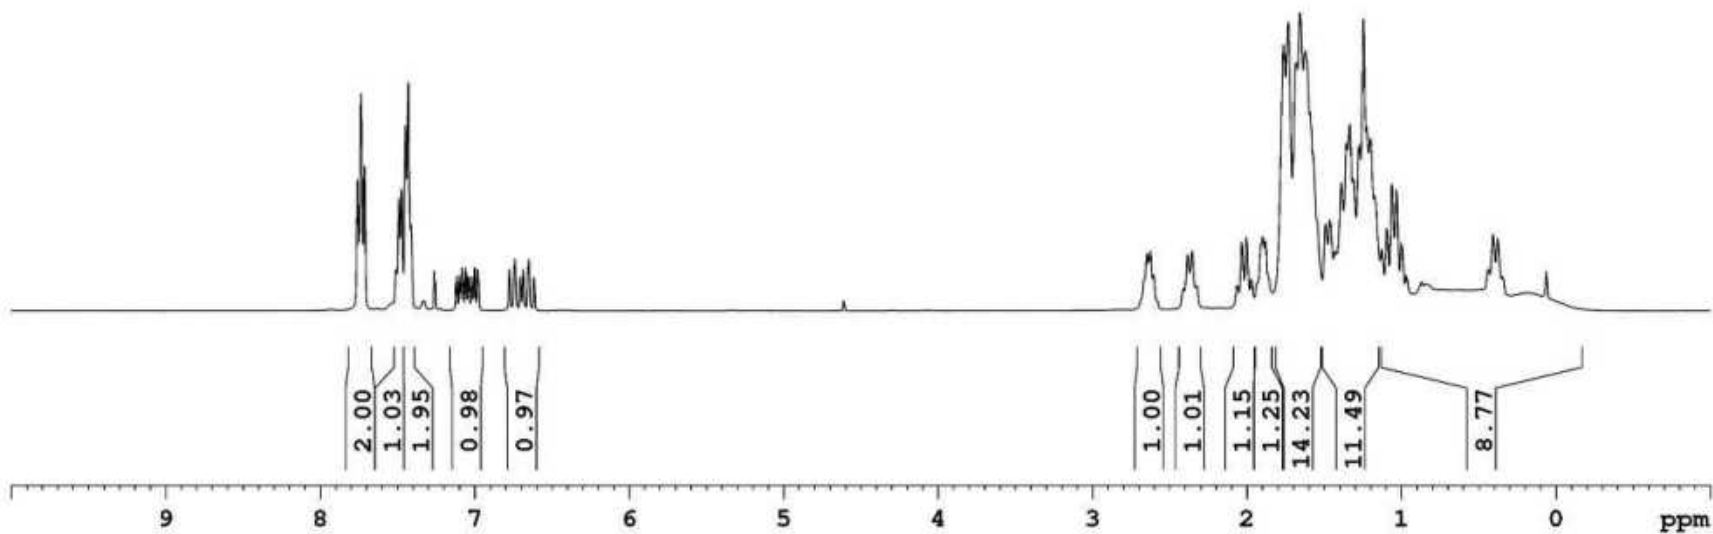



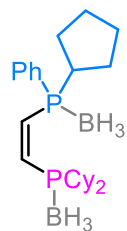

10t

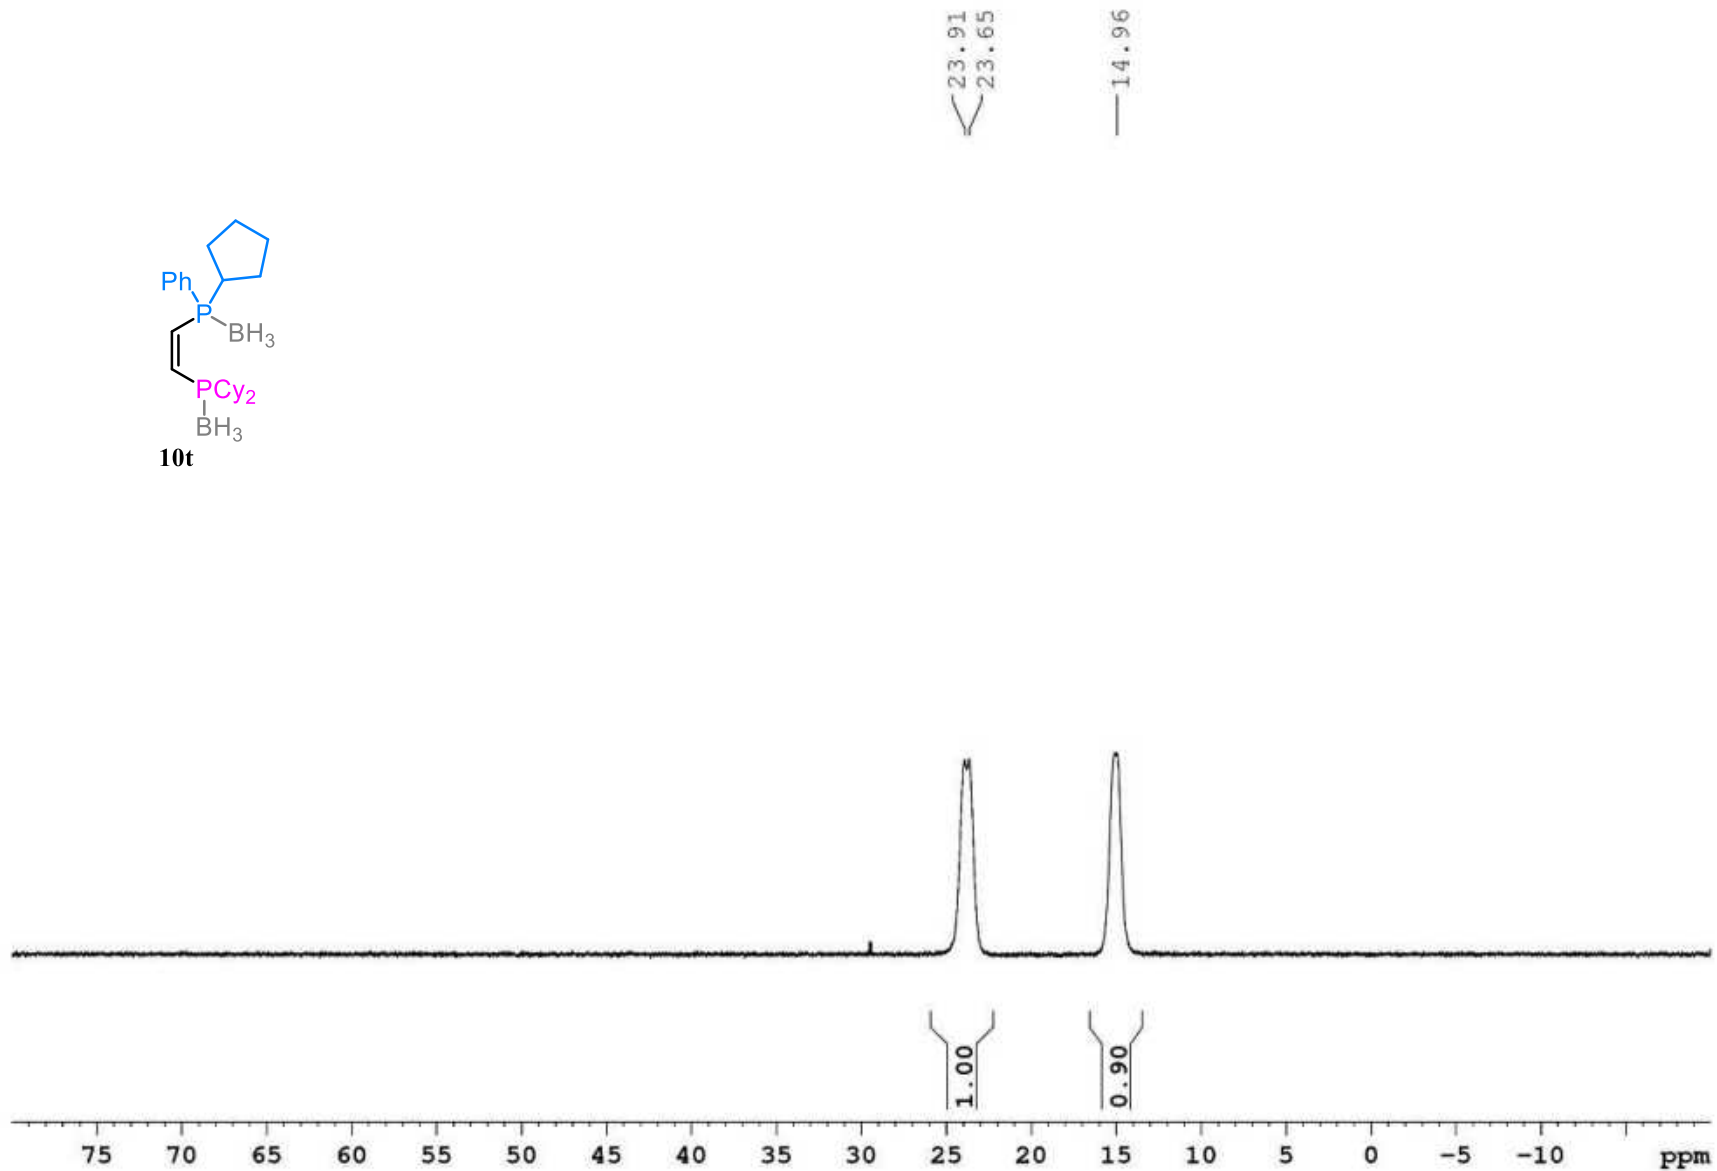



10t

~40.17  
~42.09

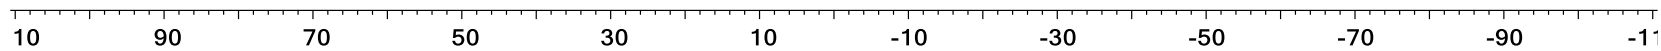

S481



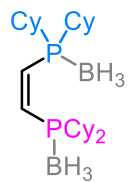

**10u**

6.74  
6.70  
6.67  
6.63

2.33  
2.33  
2.30  
2.27  
2.25  
2.24  
1.89  
1.87  
1.78  
1.70  
1.44  
1.43  
1.41  
1.28  
1.25  
1.22  
1.18  
1.16  
1.15  
0.87  
0.85  
0.84  
0.83  
0.81  
0.70  
0.44

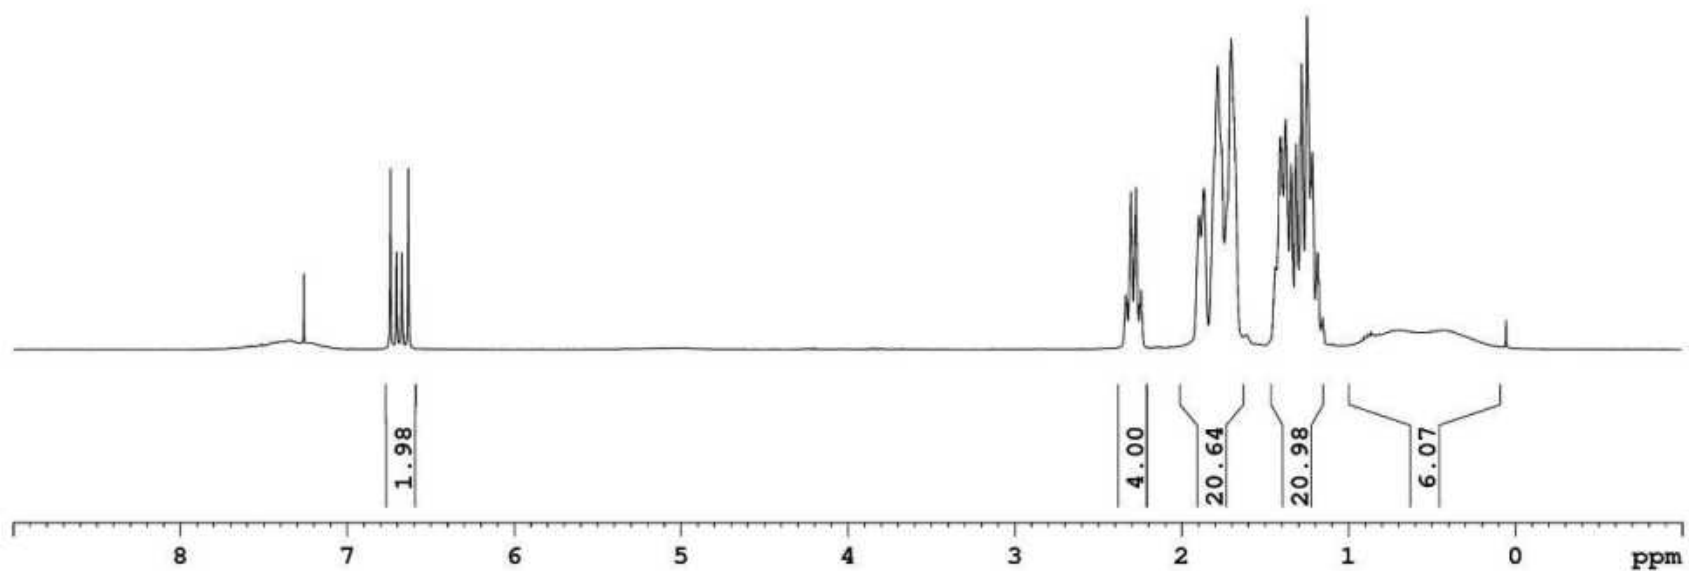





10u

—21.56

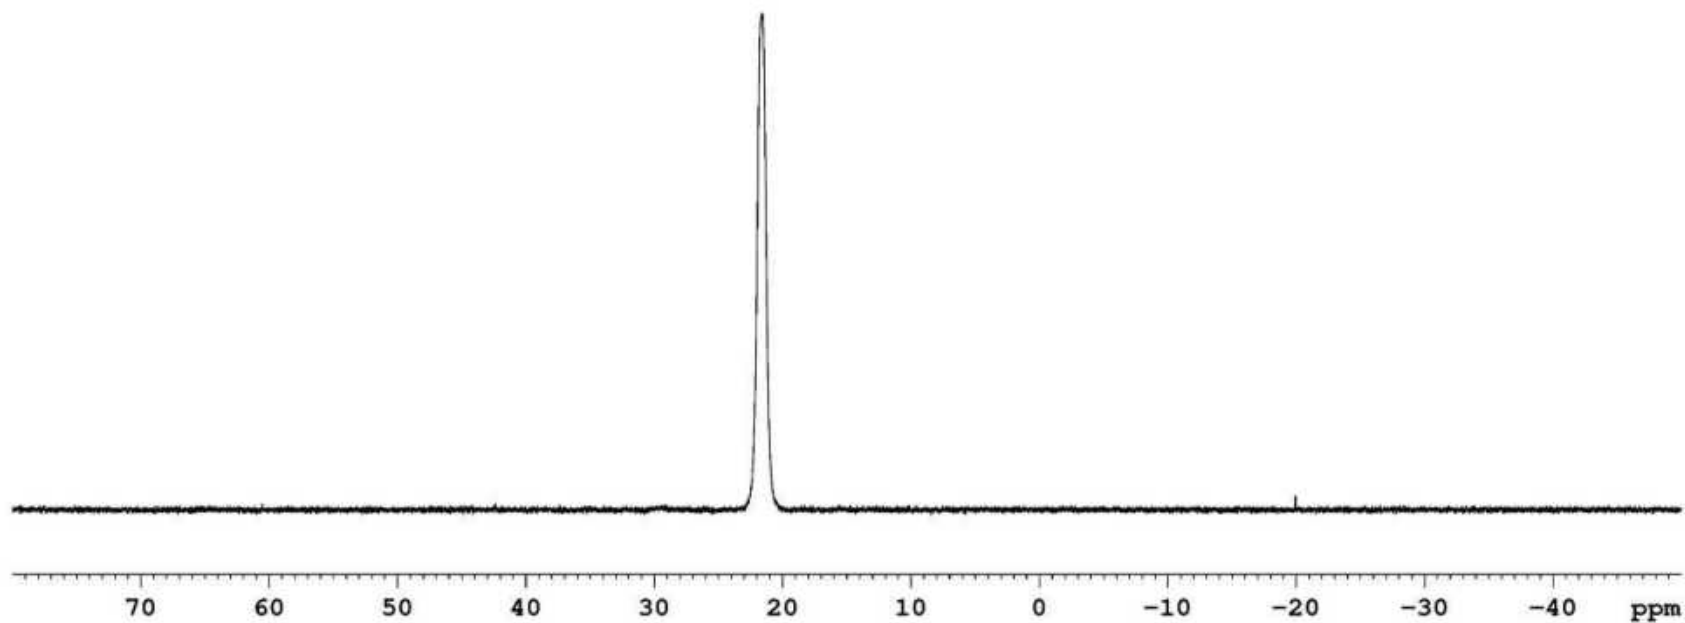

S484

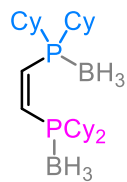

10u

— -41.04

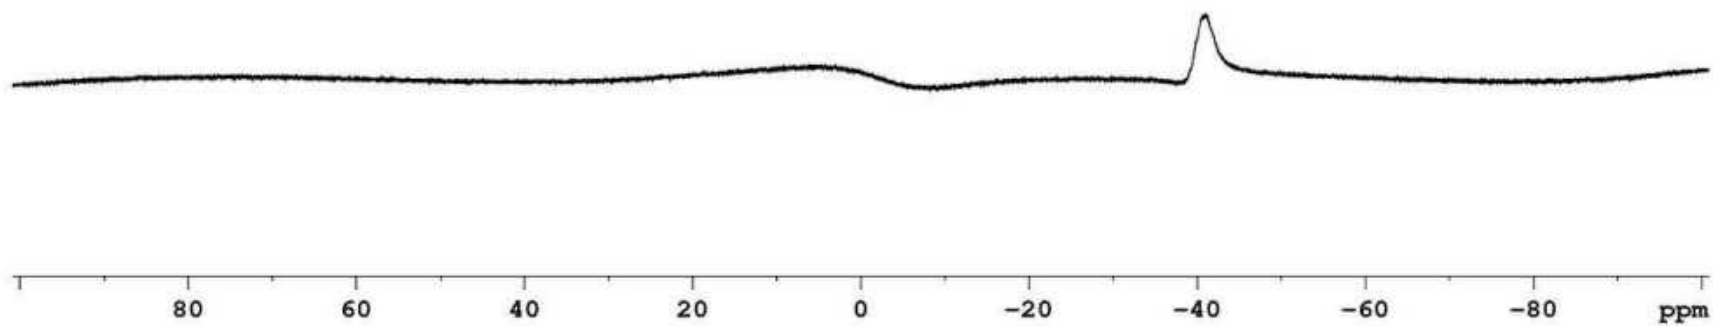

S485

7.38  
7.37  
7.34  
7.34  
7.28  
7.28  
7.27  
7.26  
7.25  
7.22  
7.21  
7.19  
7.16  
7.16  
7.15  
6.63  
6.60  
6.56  
6.56  
6.52  
6.49

2.47  
2.18  
2.15  
2.12  
2.09  
1.93  
1.89  
1.79  
1.77  
1.73  
1.70  
1.68  
1.66  
1.45  
1.41  
1.38  
1.34  
1.33  
1.22  
1.18  
1.15  
1.12  
1.09  
0.97  
0.75  
0.47  
0.24

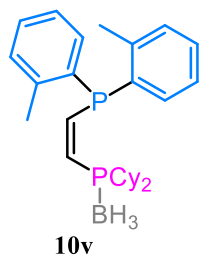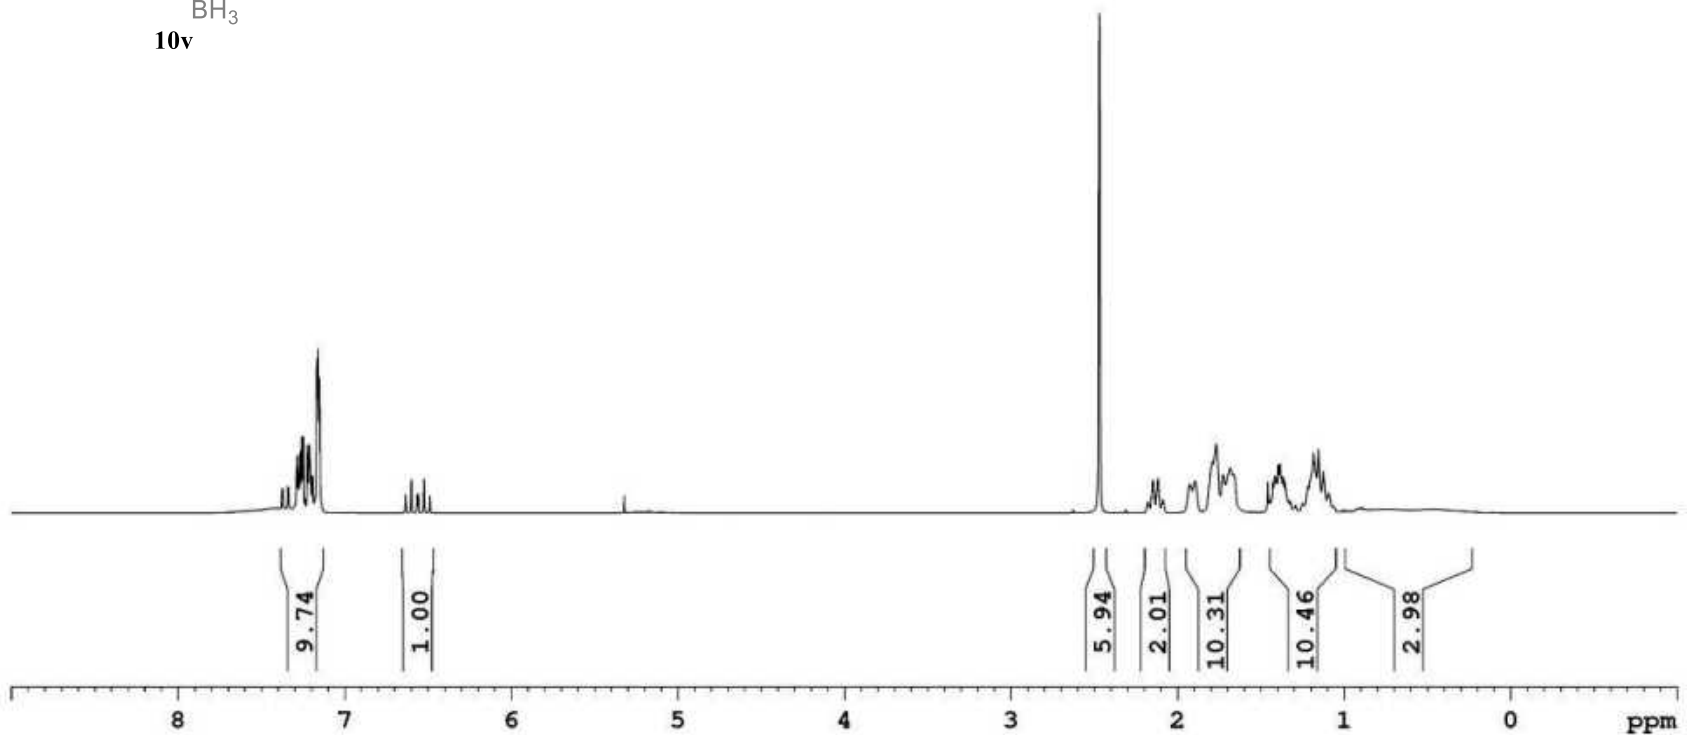



151.49  
151.28  
142.36  
142.10  
136.72  
136.60  
135.69  
135.42  
135.26  
134.99  
132.25  
130.31  
130.26  
128.87  
126.18  
126.18

33.67  
33.61  
33.34  
33.28  
27.09  
27.00  
26.87  
26.80  
26.75  
26.69  
25.91  
25.90  
21.58  
21.38

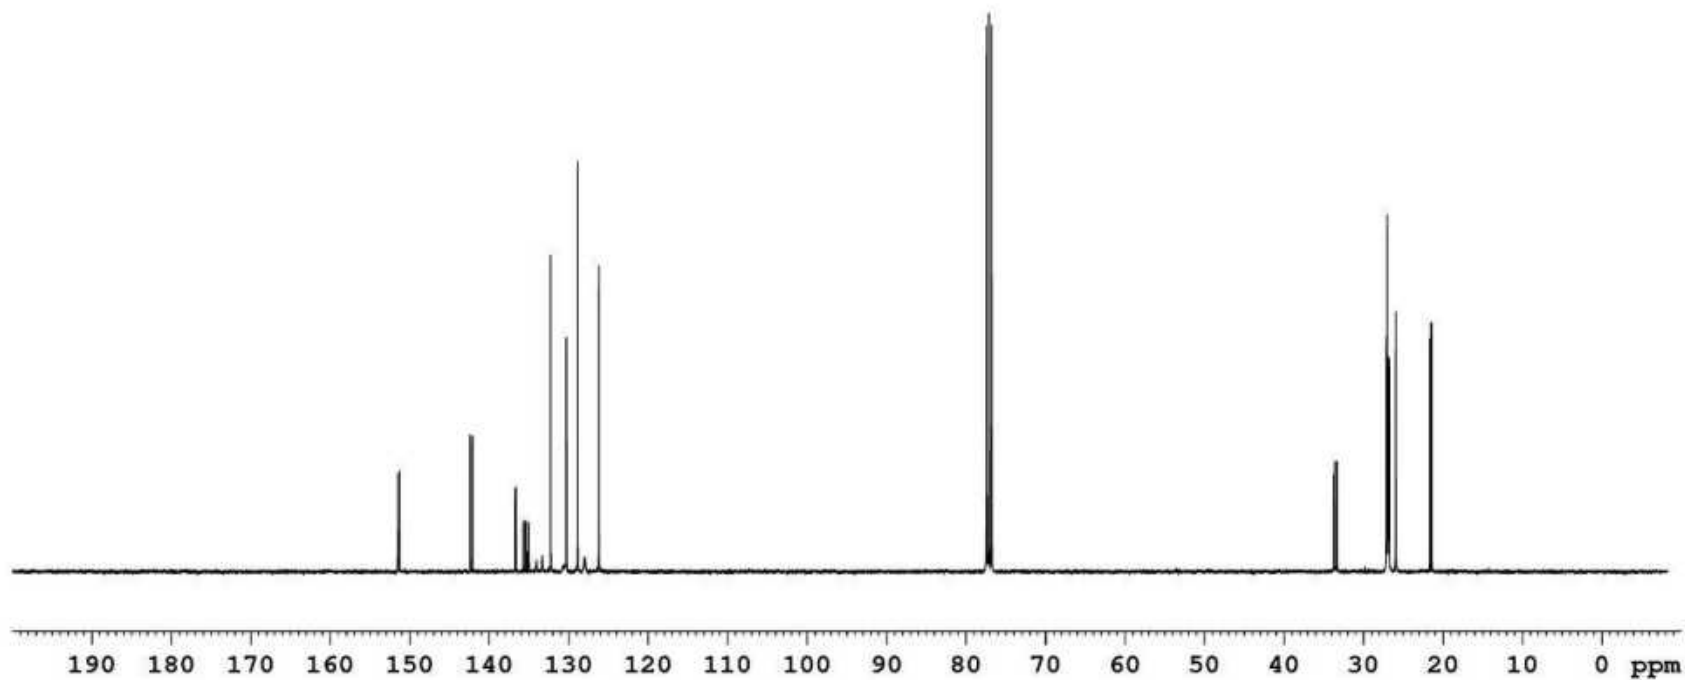

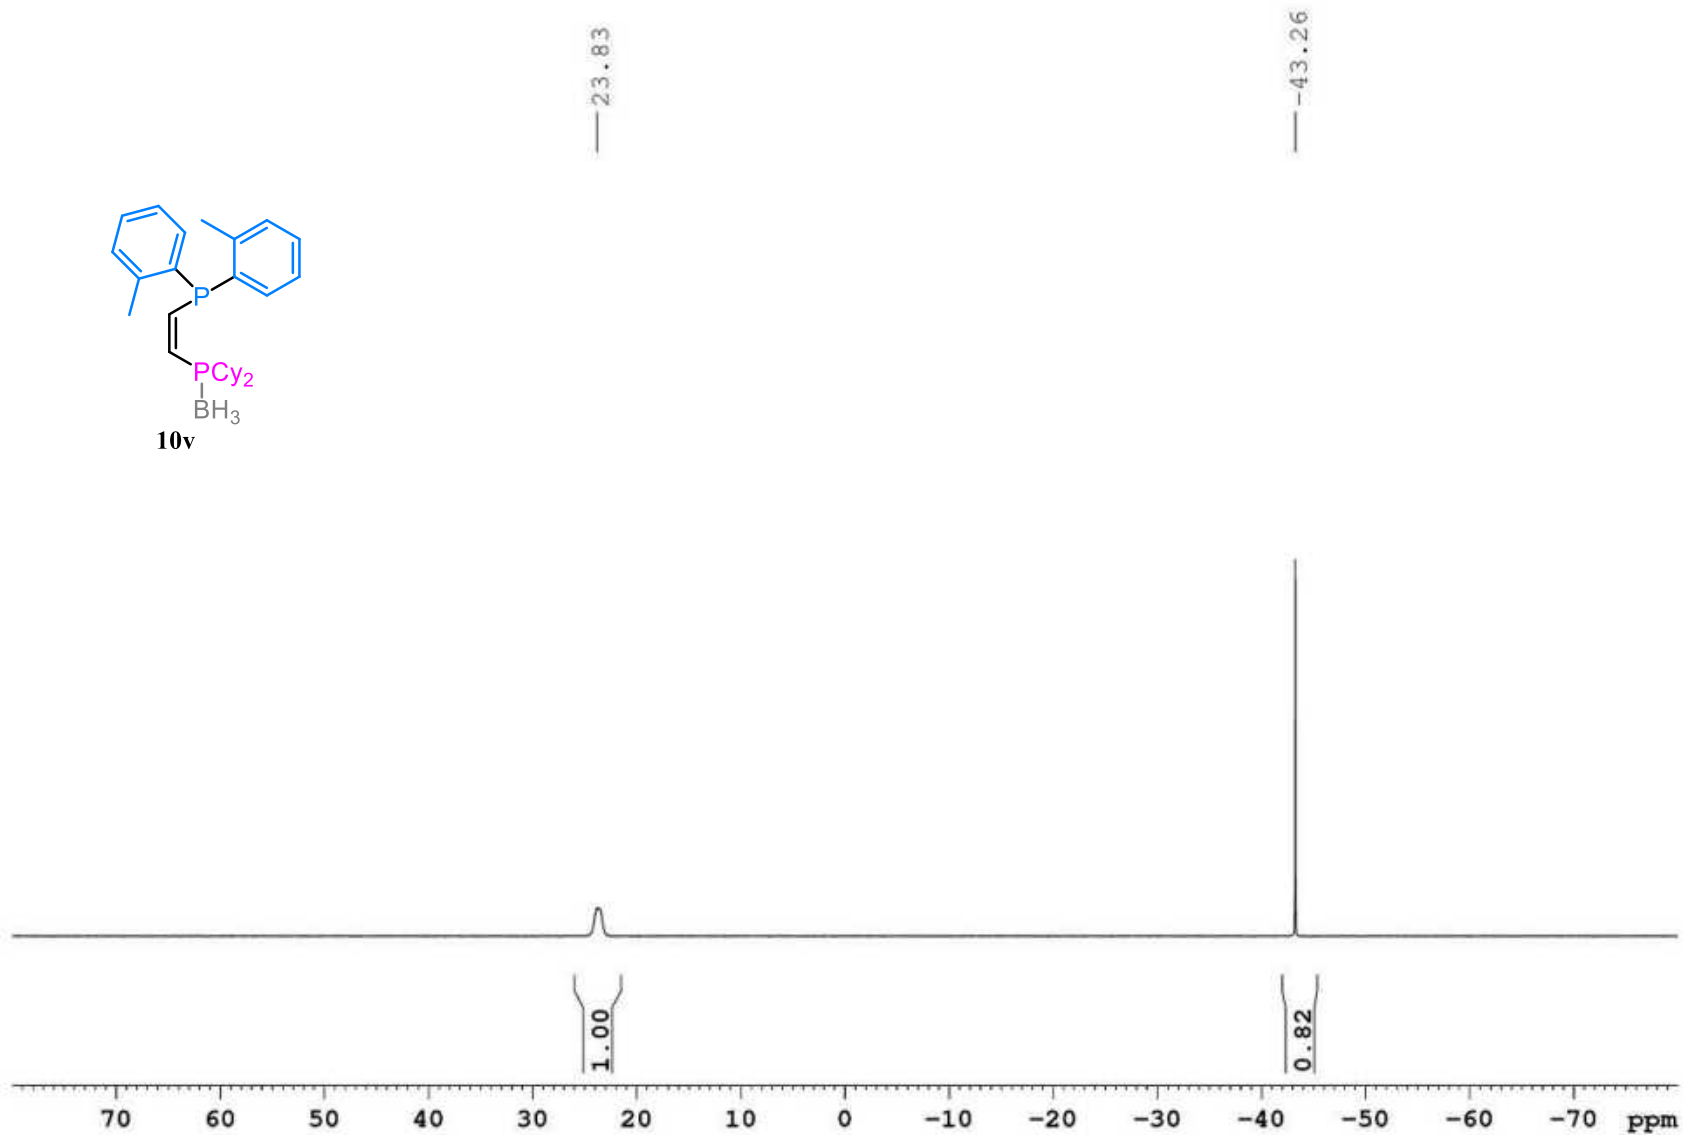

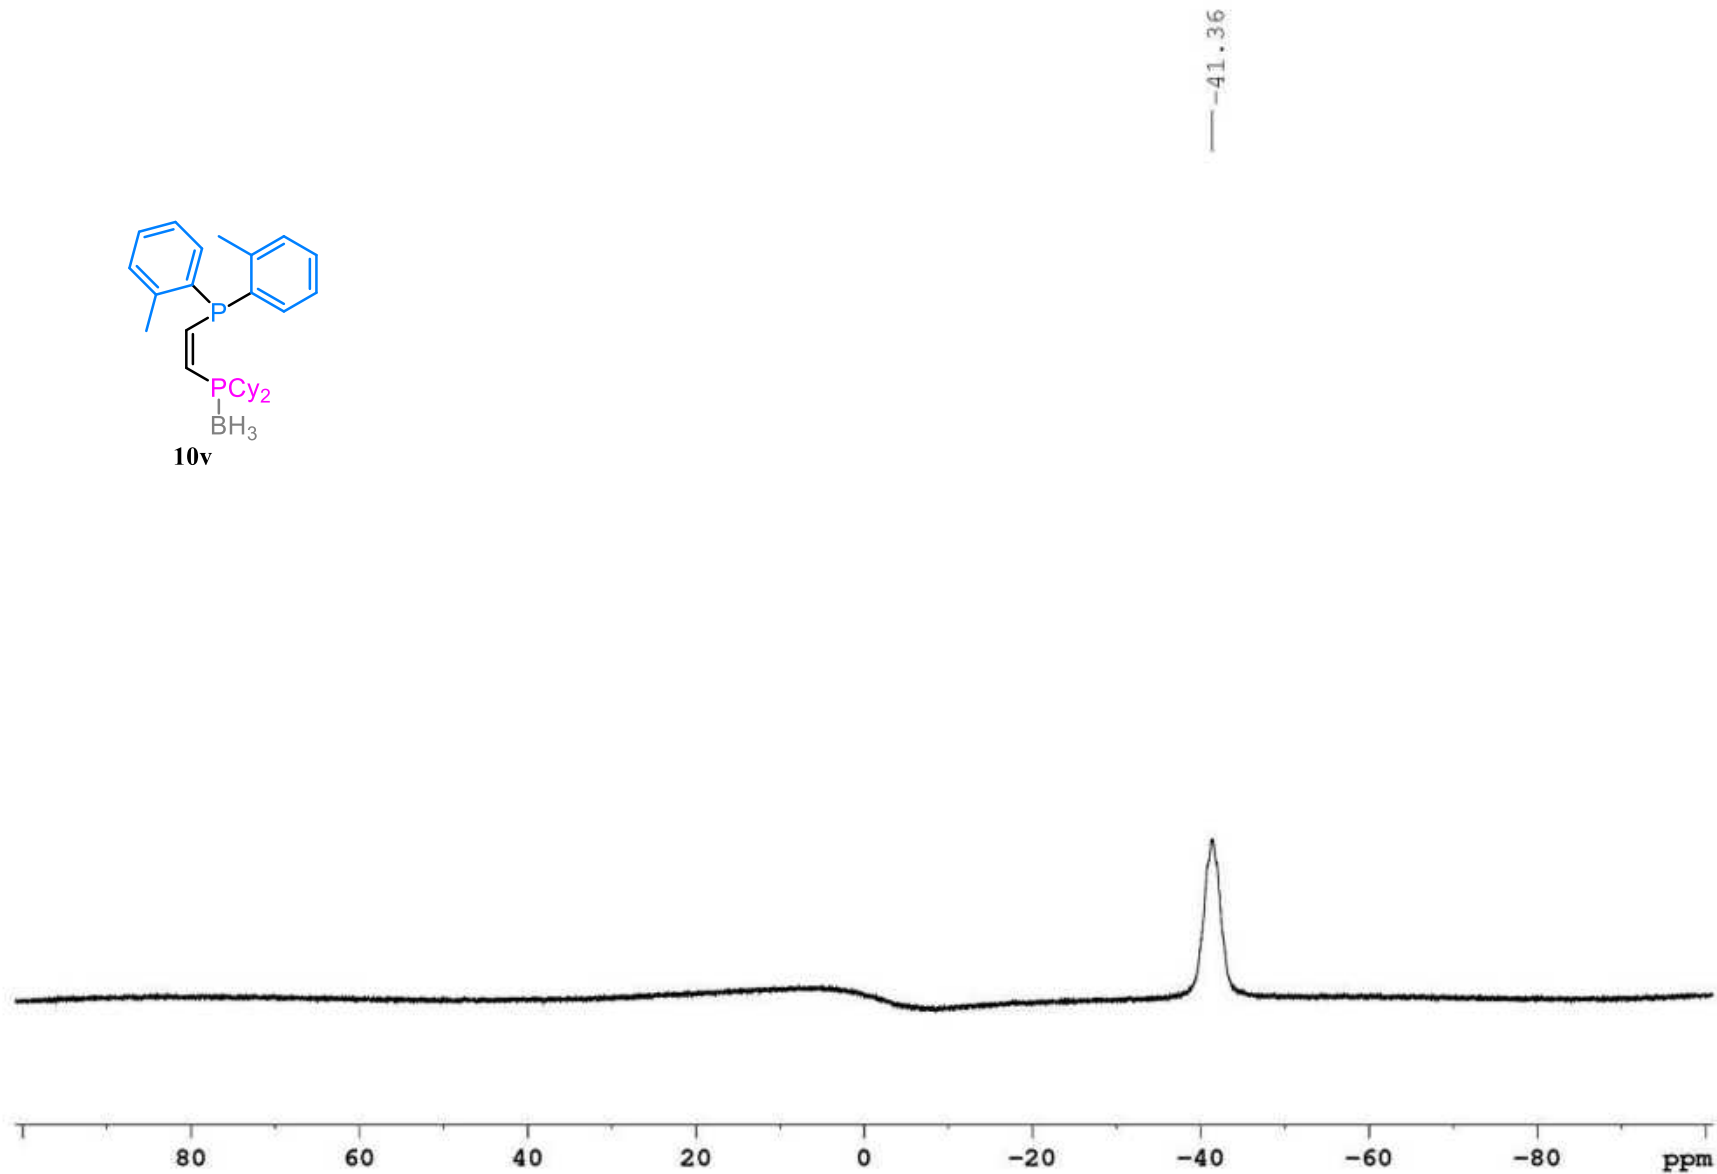



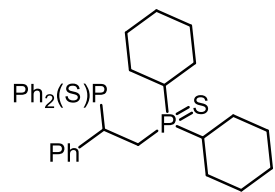

10aa

8.37  
8.35  
8.33  
7.57  
7.47  
7.45  
7.42  
7.28  
7.15

5.01  
4.99  
4.95  
4.92

2.61  
2.58  
2.55  
2.17  
2.14  
2.10  
2.07  
1.73  
1.66  
1.58  
1.46  
1.43  
1.28  
1.18  
1.16  
1.13  
1.11  
1.02  
0.92  
0.89  
0.85  
0.82  
0.73  
0.70  
0.61  
0.56

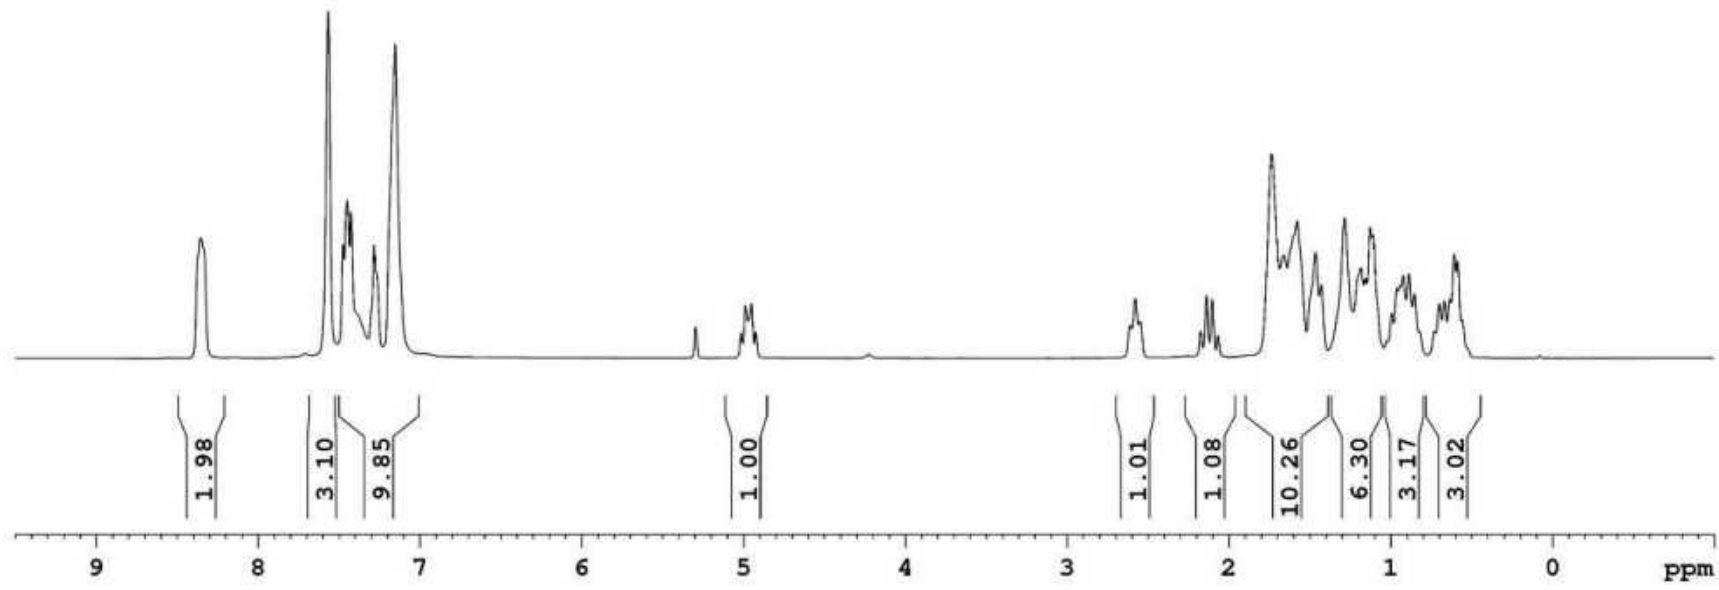

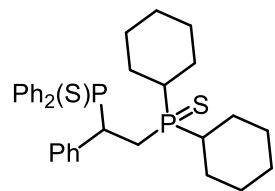

10aa

134.64  
134.60  
132.77  
132.68  
131.90  
131.88  
131.85  
131.37  
131.27  
131.16  
131.13  
131.11  
130.74  
130.61  
129.97  
128.93  
128.82  
127.96  
127.94  
127.81  
127.77  
127.74

40.45  
39.95  
39.20  
38.75  
37.36  
36.89  
27.00  
26.86  
26.60  
26.47  
26.33  
26.24  
26.21  
26.10  
25.67  
25.53  
25.36  
25.33  
24.79  
24.76  
24.38  
24.35

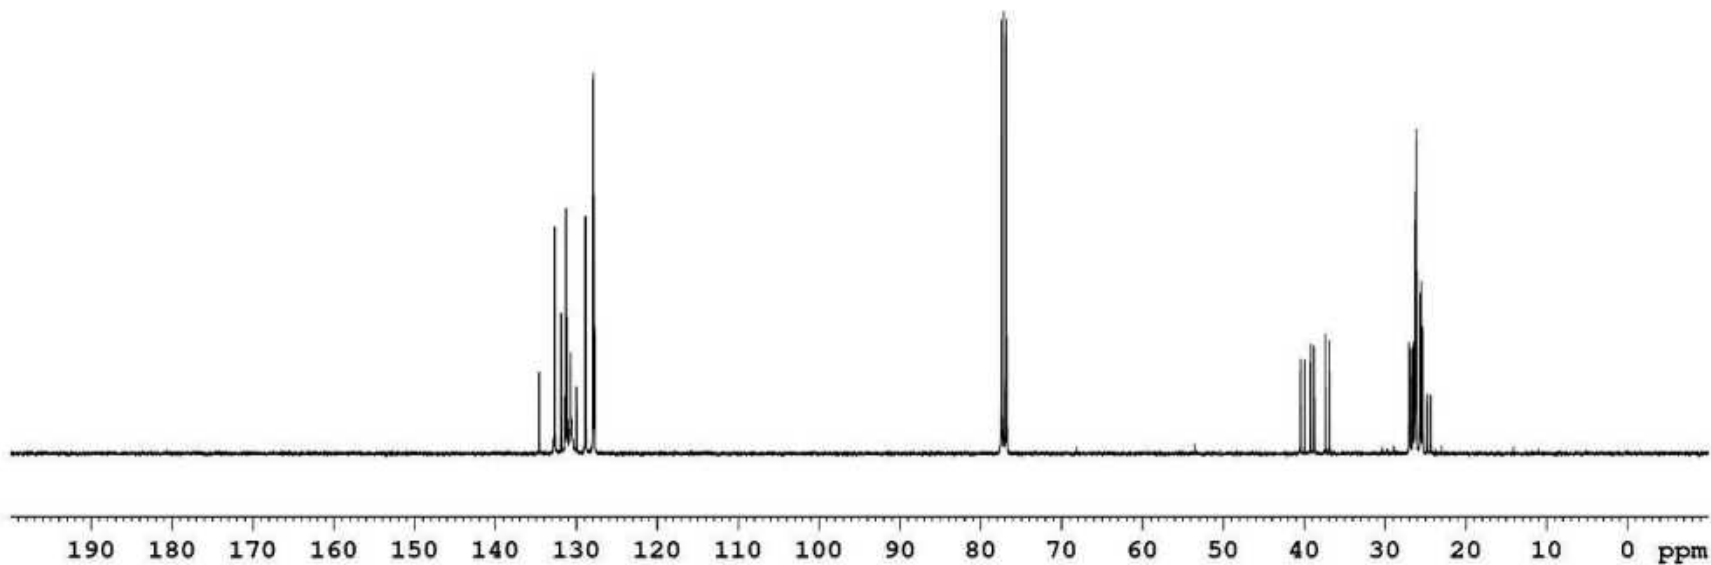



10aa

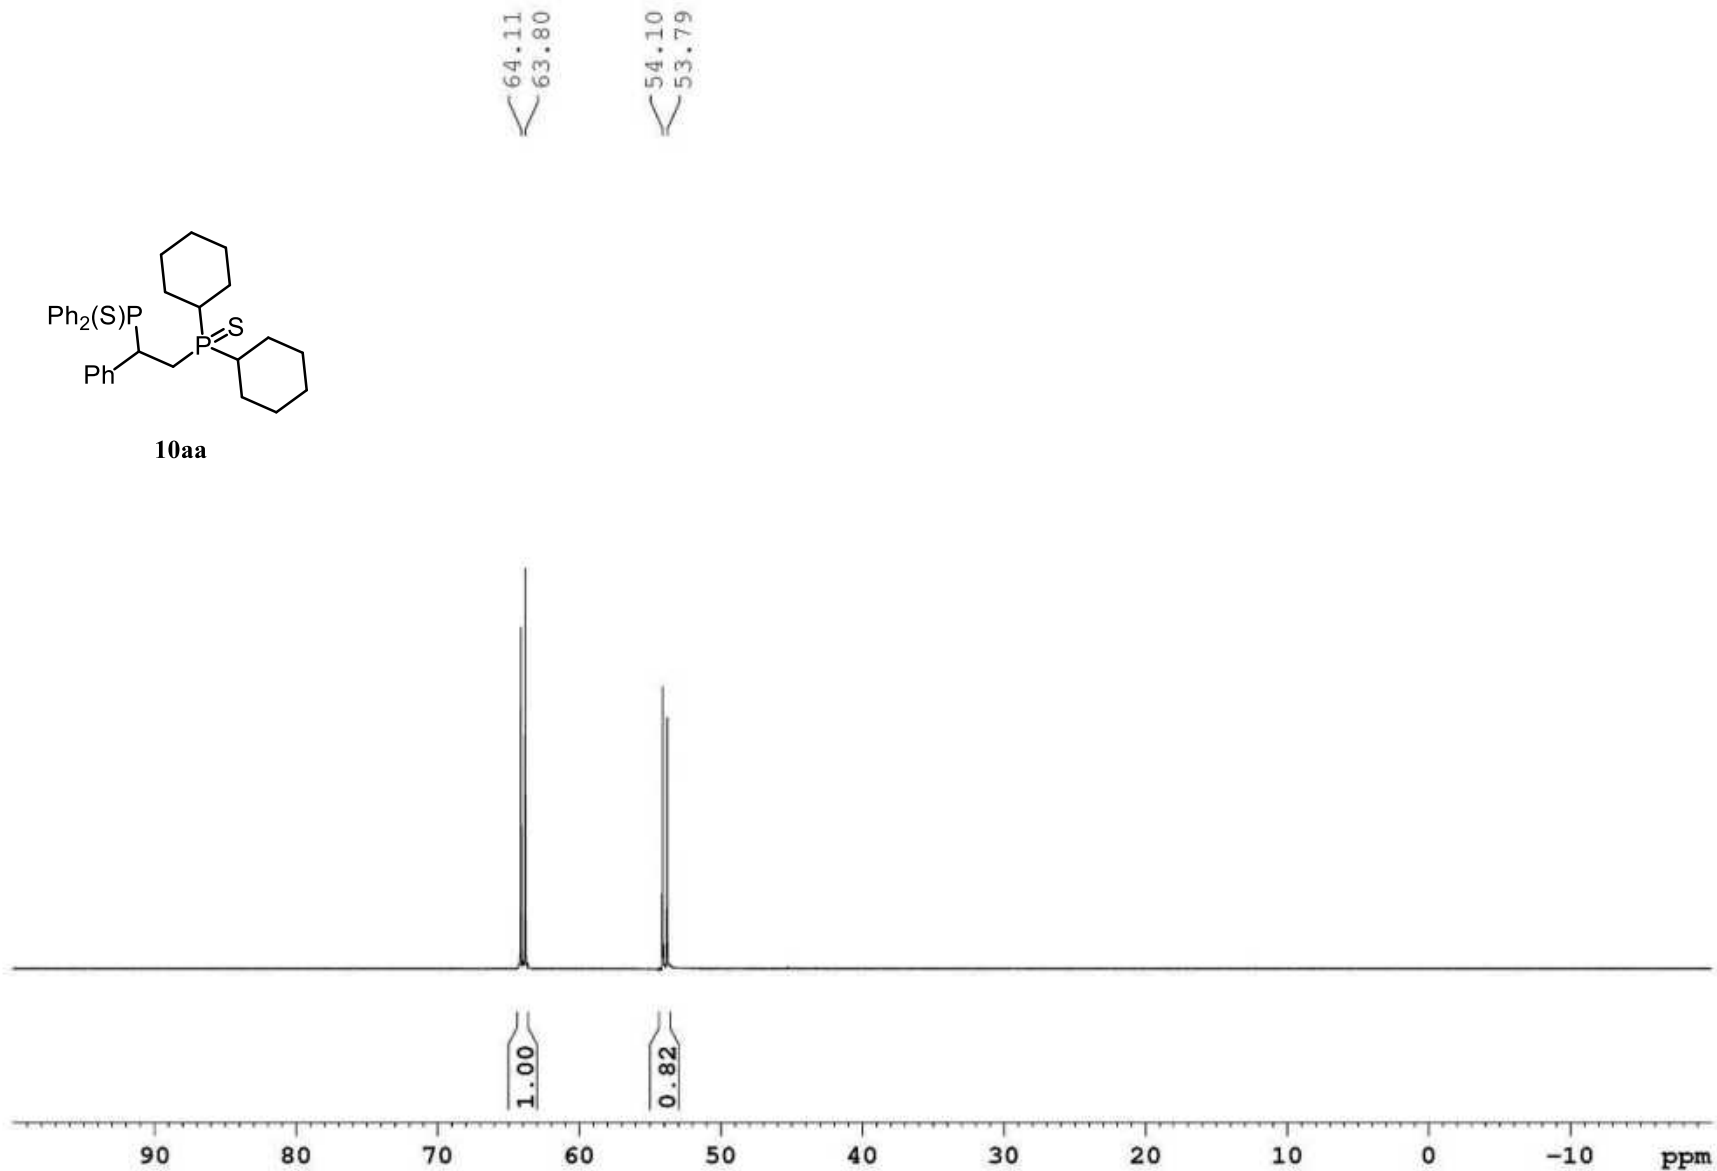

Supplement: d3qo00748k1.pdf [file d3qo00748k1.pdf]
